# Supplementary material for: Single-Cell RNA-Seq Analysis of Cells from Degenerating and Non-Degenerating Intervertebral Discs from the Same Individual Reveals New Biomarkers for Intervertebral Disc Degeneration
Source: MDPI journal article supplement (doi:10.3390/ijms23073993), 2022-04-03
Supplement: s1 [file s1]

**Table S9:** Opposite gene expression in NPnD and AFnD in total cell analysis.

| Gene     | logFC.AF     | Pval.AF   | Fdr.AF    |  | logFC.NP | Pval.NP   | Fdr.NP    |
|----------|--------------|-----------|-----------|--|----------|-----------|-----------|
| BAMBI    | 0.001226699  | 1.95E-02  | 1.00E+00  |  | -0.44419 | 7.16E-116 | 1.3E-111  |
| C10orf10 | 0.302770071  | 1.28E-34  | 2.34E-30  |  | -0.09743 | 5.718E-07 | 0.010434  |
| C1S      | 0.0050643    | 3.64E-01  | 1.00E+00  |  | -0.27177 | 4.952E-83 | 9.04E-79  |
| C2orf40  | 0.209268514  | 1.59E-06  | 2.90E-02  |  | -0.80392 | 0         | 0         |
| C7orf73  | 0.021609485  | 4.74E-06  | 8.64E-02  |  | -0.27222 | 5.41E-126 | 9.88E-122 |
| CCDC80   | 0.33012088   | 1.06E-29  | 1.94E-25  |  | -0.46874 | 3.66E-170 | 6.67E-166 |
| CHI3L1   | 0.416970778  | 5.73E-58  | 1.04E-53  |  | -0.49678 | 1.63E-82  | 2.97E-78  |
| CTSD     | 0.798865369  | 3.20E-129 | 5.84E-125 |  | -0.42878 | 1.37E-195 | 2.50E-191 |
| DUSP1    | 0.004863469  | 0.004482  | 1         |  | -0.3847  | 3.12E-124 | 5.69E-120 |
| EGR1     | 0.383555074  | 7.02E-54  | 1.28E-49  |  | -0.01361 | 0.0123146 | 1         |
| EPYC     | 0.805758755  | 1.78E-174 | 3.25E-170 |  | -0.05459 | 7.04E-09  | 0.000128  |
| FGFBP2   | 0.065406456  | 1.25E-06  | 0.022786  |  | -0.37073 | 2.00E-61  | 3.65E-57  |
| FXYP1    | 0.020384998  | 3.86E-05  | 0.705024  |  | -0.29932 | 6.93E-74  | 1.27E-69  |
| HIF-1a   | 0.251163061  | 2.92E-39  | 5.32E-35  |  | -0.0147  | 2.13E-05  | 0.389002  |
| ITM2B    | 0.076385364  | 0.211905  | 1         |  | -0.32983 | 2.73E-123 | 4.98E-119 |
| JUNB     | 0.039095944  | 1.43E-06  | 0.026066  |  | -0.55778 | 6.09E-224 | 1.11E-219 |
| MT1F     | 0.388752241  | 2.64E-47  | 4.81E-43  |  | -0.0527  | 0.0027746 | 1         |
| PNRC1    | 0.059033604  | 0.829217  | 1         |  | -0.26635 | 7.21E-116 | 1.32E-111 |
| PRELP    | 0.074196163  | 0.069956  | 1         |  | -0.59135 | 5.83E-262 | 1.06E-257 |
| SCRG1    | 0.082860694  | 0.013475  | 1         |  | -0.30437 | 1.877E-79 | 3.43E-75  |
| SOX9     | 0.105780382  | 8.31E-08  | 0.001517  |  | -0.26217 | 1.36E-65  | 2.48E-61  |
| EIF1     | -0.023088268 | 0.047079  | 1         |  | 0.488611 | 0         | 0         |
| LGALS1   | -0.335409178 | 2.88E-53  | 5.26E-49  |  | 0.120207 | 0.9493502 | 1         |
| RGCC     | -0.122823966 | 0.125307  | 1         |  | 0.434918 | 3.71E-121 | 6.76E-117 |

Avg\_logFC

Decrease

Increase
