# Supplementary material for: Single-Cell RNA-Seq Analysis of Cells from Degenerating and Non-Degenerating Intervertebral Discs from the Same Individual Reveals New Biomarkers for Intervertebral Disc Degeneration
Source: MDPI journal article supplement (doi:10.3390/ijms23073993), 2022-04-03
Supplement: s1 [file s1]

**Table S12:** Differentially expressed genes between AFD and AFnD

| gene      | cluster | avg_logFC  | p_val     | p_val_adj | pct.1 | pct.2 |
|-----------|---------|------------|-----------|-----------|-------|-------|
| SPP1      | 0       | 2.57023305 | 2.83E-124 | 5.17E-120 | 0.753 | 0.064 |
| PRG4      | 0       | 1.54276463 | 2.78E-75  | 5.07E-71  | 0.498 | 0.024 |
| COMP      | 0       | 1.4564712  | 6.75E-99  | 1.23E-94  | 0.966 | 0.613 |
| PTGS2     | 0       | 1.33641275 | 4.56E-105 | 8.32E-101 | 0.686 | 0.076 |
| VEGFA     | 0       | 1.33312822 | 9.00E-117 | 1.64E-112 | 0.874 | 0.324 |
| CHI3L2    | 0       | 1.26218405 | 1.06E-86  | 1.93E-82  | 0.912 | 0.497 |
| G0S2      | 0       | 1.19193541 | 8.62E-20  | 1.57E-15  | 0.395 | 0.174 |
| MT2A      | 0       | 1.18135357 | 5.16E-72  | 9.42E-68  | 1     | 0.997 |
| MT1X      | 0       | 1.13400835 | 2.23E-51  | 4.07E-47  | 1     | 0.995 |
| CCDC85B   | 0       | 1.10699512 | 2.68E-80  | 4.89E-76  | 0.949 | 0.702 |
| WTAP      | 0       | 1.10181237 | 2.30E-72  | 4.19E-68  | 0.908 | 0.578 |
| SERPINE2  | 0       | 1.09700184 | 4.66E-82  | 8.50E-78  | 0.998 | 0.986 |
| PHLDA1    | 0       | 1.06406901 | 3.31E-63  | 6.04E-59  | 0.469 | 0.043 |
| IGFBP3    | 0       | 1.05209957 | 1.41E-58  | 2.58E-54  | 0.433 | 0.036 |
| S100A2    | 0       | 1.02945893 | 7.50E-46  | 1.37E-41  | 0.637 | 0.291 |
| PLA2G2A   | 0       | 1.00790305 | 5.41E-55  | 9.88E-51  | 0.7   | 0.251 |
| UPP1      | 0       | 0.97409631 | 6.48E-76  | 1.18E-71  | 0.621 | 0.133 |
| MT1G      | 0       | 0.97053609 | 2.77E-35  | 5.05E-31  | 0.958 | 0.898 |
| TGFBI     | 0       | 0.97043607 | 3.93E-83  | 7.17E-79  | 0.677 | 0.141 |
| ERO1A     | 0       | 0.93333075 | 1.67E-72  | 3.05E-68  | 0.742 | 0.312 |
| FN1       | 0       | 0.89669996 | 2.87E-98  | 5.23E-94  | 1     | 0.998 |
| BMP2      | 0       | 0.87468122 | 9.39E-67  | 1.71E-62  | 0.464 | 0.028 |
| MRPS6     | 0       | 0.87106892 | 4.75E-40  | 8.68E-36  | 0.948 | 0.905 |
| PPP3CA    | 0       | 0.854816   | 1.82E-71  | 3.31E-67  | 0.93  | 0.585 |
| CTSD      | 0       | 0.84592868 | 2.09E-29  | 3.81E-25  | 0.969 | 0.938 |
| DDIT4L    | 0       | 0.81556649 | 6.31E-68  | 1.15E-63  | 0.926 | 0.552 |
| ADM       | 0       | 0.7981543  | 1.06E-43  | 1.93E-39  | 0.854 | 0.583 |
| BHLHE40   | 0       | 0.79308981 | 1.64E-45  | 3.00E-41  | 0.677 | 0.329 |
| TMEM45A   | 0       | 0.78046516 | 9.74E-57  | 1.78E-52  | 0.917 | 0.716 |
| STK17A    | 0       | 0.77699538 | 5.52E-56  | 1.01E-51  | 0.543 | 0.129 |
| IGFBP5    | 0       | 0.76784334 | 3.36E-47  | 6.14E-43  | 0.428 | 0.067 |
| ARF6      | 0       | 0.76517891 | 4.36E-61  | 7.95E-57  | 0.742 | 0.401 |
| MT1H      | 0       | 0.74073325 | 6.32E-12  | 1.15E-07  | 0.675 | 0.546 |
| CTSL      | 0       | 0.73292609 | 1.75E-23  | 3.19E-19  | 0.659 | 0.468 |
| TNFRSF12A | 0       | 0.73101355 | 1.02E-40  | 1.86E-36  | 0.451 | 0.115 |
| BZW1      | 0       | 0.72436973 | 6.62E-59  | 1.21E-54  | 0.778 | 0.408 |

|          |   |            |          |            |       |       |
|----------|---|------------|----------|------------|-------|-------|
| HILPDA   | 0 | 0.72170638 | 1.33E-45 | 2.42E-41   | 0.626 | 0.25  |
| TREM1    | 0 | 0.7061875  | 6.19E-74 | 1.13E-69   | 0.475 | 0.012 |
| SOD2     | 0 | 0.70064745 | 1.15E-41 | 2.10E-37   | 1     | 0.966 |
| CTHRC1   | 0 | 0.69561282 | 7.47E-65 | 1.36E-60   | 0.484 | 0.046 |
| FOSL1    | 0 | 0.68089746 | 1.18E-59 | 2.15E-55   | 0.417 | 0.021 |
| TIMP1    | 0 | 0.65820307 | 1.99E-17 | 3.64E-13   | 0.996 | 0.998 |
| SLC3A2   | 0 | 0.64765613 | 6.32E-32 | 1.15E-27   | 0.616 | 0.344 |
| ENO2     | 0 | 0.64649715 | 1.74E-50 | 3.17E-46   | 0.7   | 0.315 |
| CA9      | 0 | 0.63736859 | 2.37E-48 | 4.32E-44   | 0.563 | 0.174 |
| NDRG1    | 0 | 0.6345852  | 2.38E-42 | 4.35E-38   | 0.724 | 0.411 |
| FAM162A  | 0 | 0.62946033 | 1.30E-52 | 2.38E-48   | 0.957 | 0.8   |
| RNF145   | 0 | 0.62622107 | 1.46E-44 | 2.66E-40   | 0.585 | 0.219 |
| SLC2A1   | 0 | 0.61486164 | 8.61E-41 | 1.57E-36   | 0.52  | 0.177 |
| PGK1     | 0 | 0.60509615 | 1.11E-47 | 2.02E-43   | 0.953 | 0.878 |
| PTP4A1   | 0 | 0.59990636 | 3.77E-32 | 6.88E-28   | 0.652 | 0.404 |
| PDE4B    | 0 | 0.59557382 | 1.54E-53 | 2.81E-49   | 0.558 | 0.134 |
| EGLN3    | 0 | 0.59324109 | 3.89E-41 | 7.10E-37   | 0.525 | 0.17  |
| ARRDC3   | 0 | 0.57326062 | 1.26E-19 | 2.30E-15   | 0.532 | 0.324 |
| PPP1CB   | 0 | 0.57314315 | 2.59E-27 | 4.73E-23   | 0.832 | 0.644 |
| CRTAC1   | 0 | 0.57207933 | 1.63E-48 | 2.98E-44   | 0.493 | 0.112 |
| GAPDH    | 0 | 0.56821964 | 3.54E-44 | 6.46E-40   | 1     | 1     |
| NRP2     | 0 | 0.565826   | 3.51E-36 | 6.41E-32   | 0.403 | 0.095 |
| PPP1R15A | 0 | 0.5616194  | 2.21E-39 | 4.02E-35   | 0.56  | 0.222 |
| ORM1     | 0 | 0.56081399 | 1.03E-08 | 0.00018875 | 0.383 | 0.246 |
| PPFIBP1  | 0 | 0.56073728 | 4.90E-30 | 8.94E-26   | 0.601 | 0.348 |
| HLA-DRB1 | 0 | 0.56036782 | 4.28E-39 | 7.81E-35   | 0.534 | 0.201 |
| SLC25A37 | 0 | 0.55991999 | 1.55E-41 | 2.82E-37   | 0.897 | 0.668 |
| AK2      | 0 | 0.55580456 | 1.12E-41 | 2.04E-37   | 0.819 | 0.587 |
| PMP22    | 0 | 0.54908564 | 1.42E-33 | 2.59E-29   | 0.848 | 0.625 |
| SGIP1    | 0 | 0.54598083 | 1.15E-53 | 2.10E-49   | 0.401 | 0.029 |
| VAPA     | 0 | 0.52554077 | 2.27E-48 | 4.15E-44   | 0.964 | 0.842 |
| NAMPT    | 0 | 0.51059213 | 4.08E-31 | 7.45E-27   | 0.697 | 0.425 |
| ATP6V1G1 | 0 | 0.50606359 | 3.53E-48 | 6.44E-44   | 0.993 | 0.955 |
| MT1F     | 0 | 0.50538905 | 8.41E-14 | 1.53E-09   | 0.91  | 0.869 |
| WDR45B   | 0 | 0.50319133 | 1.03E-38 | 1.88E-34   | 0.579 | 0.241 |
| EMP3     | 0 | 0.49957119 | 3.52E-38 | 6.43E-34   | 0.919 | 0.78  |
| GBE1     | 0 | 0.49508247 | 4.28E-25 | 7.81E-21   | 0.722 | 0.539 |
| ARPP19   | 0 | 0.491237   | 1.02E-34 | 1.86E-30   | 0.704 | 0.425 |
| ARF4     | 0 | 0.48739634 | 5.29E-32 | 9.64E-28   | 0.785 | 0.575 |

|            |   |            |          |          |       |       |
|------------|---|------------|----------|----------|-------|-------|
| GOLT1B     | 0 | 0.48657387 | 1.06E-40 | 1.93E-36 | 0.542 | 0.189 |
| DNAJB9     | 0 | 0.48249053 | 6.07E-32 | 1.11E-27 | 0.758 | 0.522 |
| SPRY2      | 0 | 0.46859692 | 1.41E-36 | 2.57E-32 | 0.354 | 0.059 |
| CLK1       | 0 | 0.46551444 | 1.86E-34 | 3.39E-30 | 0.74  | 0.446 |
| BTG1       | 0 | 0.45360596 | 1.13E-23 | 2.06E-19 | 0.989 | 0.974 |
| WWP2       | 0 | 0.44420283 | 1.44E-21 | 2.63E-17 | 0.713 | 0.513 |
| NT5C3A     | 0 | 0.4431571  | 1.53E-25 | 2.79E-21 | 0.46  | 0.2   |
| SAR1A      | 0 | 0.44234708 | 9.91E-34 | 1.81E-29 | 0.621 | 0.301 |
| INSIG2     | 0 | 0.43928706 | 2.78E-18 | 5.08E-14 | 0.599 | 0.43  |
| RNMT       | 0 | 0.43736782 | 5.30E-24 | 9.67E-20 | 0.551 | 0.308 |
| SLC5A3     | 0 | 0.43450182 | 4.41E-18 | 8.05E-14 | 0.578 | 0.372 |
| SH3BP5     | 0 | 0.433618   | 6.68E-22 | 1.22E-17 | 0.579 | 0.346 |
| HSPA5      | 0 | 0.4274981  | 4.44E-14 | 8.10E-10 | 0.509 | 0.332 |
| ERRFI1     | 0 | 0.42678325 | 8.64E-18 | 1.58E-13 | 0.399 | 0.186 |
| WDR33      | 0 | 0.42677    | 3.00E-25 | 5.47E-21 | 0.601 | 0.361 |
| FGFBP2     | 0 | 0.42671048 | 1.94E-19 | 3.53E-15 | 0.966 | 0.914 |
| ISG20      | 0 | 0.42506703 | 9.79E-21 | 1.79E-16 | 0.605 | 0.392 |
| SLC39A8    | 0 | 0.42104845 | 1.29E-26 | 2.36E-22 | 0.525 | 0.256 |
| HMGA1      | 0 | 0.42000124 | 6.55E-13 | 1.19E-08 | 0.404 | 0.238 |
| RAB13      | 0 | 0.4184382  | 4.75E-30 | 8.67E-26 | 0.933 | 0.831 |
| GPX1       | 0 | 0.41649906 | 6.93E-27 | 1.26E-22 | 0.921 | 0.83  |
| XBP1       | 0 | 0.41592116 | 5.95E-21 | 1.09E-16 | 0.693 | 0.516 |
| ENO1       | 0 | 0.41555348 | 1.70E-22 | 3.09E-18 | 0.998 | 0.983 |
| DDIT3      | 0 | 0.41551487 | 9.33E-22 | 1.70E-17 | 0.648 | 0.399 |
| IFRD1      | 0 | 0.41477745 | 3.64E-26 | 6.63E-22 | 0.742 | 0.527 |
| GRB10      | 0 | 0.41373976 | 1.02E-33 | 1.86E-29 | 0.253 | 0.012 |
| CSGALNACT2 | 0 | 0.41100294 | 4.77E-25 | 8.70E-21 | 0.413 | 0.157 |
| C4orf48    | 0 | 0.40953343 | 1.66E-31 | 3.03E-27 | 0.428 | 0.127 |
| NPR3       | 0 | 0.40818493 | 3.41E-41 | 6.22E-37 | 0.287 | 0.007 |
| COX17      | 0 | 0.40036541 | 4.37E-27 | 7.97E-23 | 0.807 | 0.623 |
| TMEM38B    | 0 | 0.39916839 | 1.28E-23 | 2.34E-19 | 0.671 | 0.449 |
| RABGGTB    | 0 | 0.39754429 | 1.12E-25 | 2.04E-21 | 0.791 | 0.616 |
| ZNF385D    | 0 | 0.39505137 | 1.22E-22 | 2.22E-18 | 0.749 | 0.532 |
| SLC25A36   | 0 | 0.38965099 | 6.39E-28 | 1.17E-23 | 0.652 | 0.361 |
| BAALC      | 0 | 0.38837797 | 5.73E-18 | 1.04E-13 | 0.505 | 0.286 |
| TFPI       | 0 | 0.38197232 | 8.09E-29 | 1.48E-24 | 0.301 | 0.053 |
| CD44       | 0 | 0.38111769 | 6.47E-25 | 1.18E-20 | 0.951 | 0.785 |
| CAPZA2     | 0 | 0.37981467 | 3.40E-24 | 6.21E-20 | 0.753 | 0.575 |
| RELB       | 0 | 0.37760797 | 9.80E-23 | 1.79E-18 | 0.417 | 0.169 |

|          |   |            |          |            |       |       |
|----------|---|------------|----------|------------|-------|-------|
| MED21    | 0 | 0.37724821 | 7.06E-20 | 1.29E-15   | 0.581 | 0.367 |
| ATP6V0E1 | 0 | 0.37688982 | 2.52E-27 | 4.59E-23   | 0.919 | 0.824 |
| CLEC2B   | 0 | 0.37476552 | 1.19E-08 | 0.00021683 | 0.285 | 0.155 |
| EPS8     | 0 | 0.37410798 | 2.23E-24 | 4.08E-20   | 0.442 | 0.179 |
| RAB1A    | 0 | 0.37267944 | 2.16E-22 | 3.95E-18   | 0.785 | 0.675 |
| MIF      | 0 | 0.37082763 | 1.16E-40 | 2.12E-36   | 1     | 1     |
| CDK5RAP2 | 0 | 0.36670705 | 2.97E-13 | 5.42E-09   | 0.305 | 0.134 |
| FAM210A  | 0 | 0.36317036 | 1.36E-26 | 2.49E-22   | 0.458 | 0.186 |
| KLF3     | 0 | 0.36113752 | 6.63E-17 | 1.21E-12   | 0.417 | 0.208 |
| BNIP3    | 0 | 0.36065951 | 1.28E-20 | 2.33E-16   | 0.998 | 0.997 |
| GLRX     | 0 | 0.35531239 | 5.34E-08 | 0.00097381 | 0.422 | 0.293 |
| C11orf96 | 0 | 0.35141613 | 1.28E-20 | 2.33E-16   | 0.285 | 0.077 |
| EIF4EBP1 | 0 | 0.35078785 | 1.21E-11 | 2.20E-07   | 0.565 | 0.423 |
| EVI2A    | 0 | 0.34780392 | 1.41E-30 | 2.58E-26   | 0.383 | 0.096 |
| PLAUR    | 0 | 0.34737224 | 3.24E-23 | 5.91E-19   | 0.428 | 0.174 |
| HMGA2    | 0 | 0.3438079  | 5.68E-38 | 1.04E-33   | 0.26  | 0.003 |
| SMIM15   | 0 | 0.3429076  | 6.33E-18 | 1.16E-13   | 0.536 | 0.336 |
| DNER     | 0 | 0.34260159 | 1.82E-13 | 3.31E-09   | 0.57  | 0.391 |
| CLDND1   | 0 | 0.3414832  | 6.95E-23 | 1.27E-18   | 0.565 | 0.317 |
| CTNNB1   | 0 | 0.33982693 | 5.93E-12 | 1.08E-07   | 0.401 | 0.231 |
| GUK1     | 0 | 0.33973742 | 5.42E-28 | 9.90E-24   | 0.94  | 0.821 |
| SMIM3    | 0 | 0.33879964 | 4.02E-31 | 7.33E-27   | 0.354 | 0.076 |
| SELK     | 0 | 0.33871696 | 1.31E-25 | 2.39E-21   | 0.895 | 0.797 |
| TM4SF1   | 0 | 0.33722445 | 1.53E-06 | 0.02786366 | 0.484 | 0.372 |
| SDCBP    | 0 | 0.33502181 | 3.05E-15 | 5.56E-11   | 0.652 | 0.463 |
| RGS16    | 0 | 0.33348338 | 4.16E-14 | 7.58E-10   | 0.291 | 0.114 |
| RSRC2    | 0 | 0.33305575 | 3.14E-18 | 5.73E-14   | 0.605 | 0.392 |
| STK26    | 0 | 0.33220066 | 2.48E-28 | 4.53E-24   | 0.384 | 0.108 |
| PTGES3   | 0 | 0.33091337 | 1.17E-27 | 2.14E-23   | 0.984 | 0.943 |
| SERPINE1 | 0 | 0.33064337 | 3.91E-28 | 7.14E-24   | 0.244 | 0.024 |
| SNRNP27  | 0 | 0.32981854 | 5.38E-22 | 9.82E-18   | 0.529 | 0.281 |
| ADAMTS6  | 0 | 0.32511989 | 1.11E-16 | 2.02E-12   | 0.218 | 0.053 |
| POLR2H   | 0 | 0.32284921 | 1.44E-21 | 2.63E-17   | 0.616 | 0.367 |
| MMP3     | 0 | 0.32024126 | 1.69E-08 | 0.00030805 | 0.883 | 0.785 |
| SEC61G   | 0 | 0.31754639 | 2.72E-20 | 4.97E-16   | 0.993 | 0.991 |
| C15orf48 | 0 | 0.3161471  | 7.20E-21 | 1.31E-16   | 0.179 | 0.015 |
| VDAC1    | 0 | 0.31612047 | 1.69E-14 | 3.08E-10   | 0.856 | 0.823 |
| DDIT4    | 0 | 0.31555938 | 1.32E-11 | 2.41E-07   | 0.558 | 0.384 |
| CCNG2    | 0 | 0.31386815 | 1.55E-12 | 2.82E-08   | 0.558 | 0.401 |

|          |   |            |          |            |       |       |
|----------|---|------------|----------|------------|-------|-------|
| EGR1     | 0 | 0.31286721 | 8.20E-11 | 1.50E-06   | 0.403 | 0.241 |
| MSANTD3  | 0 | 0.31117059 | 1.47E-23 | 2.69E-19   | 0.43  | 0.17  |
| A4GALT   | 0 | 0.31086102 | 1.78E-33 | 3.25E-29   | 0.26  | 0.015 |
| AK4      | 0 | 0.30716611 | 1.48E-18 | 2.69E-14   | 0.547 | 0.308 |
| NTMT1    | 0 | 0.30709727 | 1.01E-19 | 1.84E-15   | 0.545 | 0.303 |
| RNF126   | 0 | 0.30455342 | 3.56E-22 | 6.50E-18   | 0.401 | 0.153 |
| METAP2   | 0 | 0.30412284 | 9.24E-20 | 1.69E-15   | 0.836 | 0.685 |
| UBL3     | 0 | 0.30366947 | 3.40E-16 | 6.20E-12   | 0.567 | 0.355 |
| CFD      | 0 | 0.30217626 | 8.62E-15 | 1.57E-10   | 0.307 | 0.115 |
| NBPF14   | 0 | 0.30141876 | 7.78E-25 | 1.42E-20   | 0.383 | 0.126 |
| PLA2G4A  | 0 | 0.30066771 | 6.72E-22 | 1.23E-17   | 0.408 | 0.16  |
| HMG1N1   | 0 | 0.30065704 | 3.29E-14 | 6.00E-10   | 0.841 | 0.762 |
| IER3     | 0 | 0.30034454 | 3.74E-14 | 6.82E-10   | 0.296 | 0.117 |
| PID1     | 0 | 0.29986622 | 2.53E-12 | 4.62E-08   | 0.606 | 0.448 |
| SYPL1    | 0 | 0.2997512  | 1.89E-16 | 3.45E-12   | 0.745 | 0.582 |
| TMSB4X   | 0 | 0.29945314 | 6.28E-08 | 0.00114616 | 0.726 | 0.614 |
| C11orf31 | 0 | 0.2944233  | 5.19E-16 | 9.47E-12   | 0.778 | 0.671 |
| CLDN12   | 0 | 0.29440262 | 4.15E-21 | 7.57E-17   | 0.448 | 0.198 |
| PHPT1    | 0 | 0.29094434 | 3.70E-16 | 6.76E-12   | 0.8   | 0.656 |
| SEP7     | 0 | 0.28997641 | 3.54E-12 | 6.45E-08   | 0.619 | 0.472 |
| PLCG2    | 0 | 0.28780161 | 1.85E-17 | 3.38E-13   | 0.197 | 0.038 |
| CD55     | 0 | 0.28721678 | 8.20E-13 | 1.50E-08   | 0.662 | 0.491 |
| PCSK1N   | 0 | 0.28710851 | 1.45E-16 | 2.64E-12   | 0.287 | 0.098 |
| TRMT112  | 0 | 0.28637881 | 8.80E-19 | 1.61E-14   | 0.942 | 0.893 |
| CDC37L1  | 0 | 0.28484276 | 3.09E-17 | 5.64E-13   | 0.511 | 0.287 |
| NDUFC1   | 0 | 0.28227855 | 9.64E-17 | 1.76E-12   | 0.89  | 0.799 |
| ZNF593   | 0 | 0.27934841 | 6.69E-17 | 1.22E-12   | 0.59  | 0.365 |
| SNHG12   | 0 | 0.27894724 | 2.86E-11 | 5.22E-07   | 0.605 | 0.454 |
| IL11     | 0 | 0.27826132 | 9.04E-17 | 1.65E-12   | 0.117 | 0.002 |
| WSB1     | 0 | 0.27781814 | 4.66E-18 | 8.50E-14   | 0.868 | 0.73  |
| ATP6V1C1 | 0 | 0.27777545 | 2.84E-16 | 5.18E-12   | 0.507 | 0.299 |
| RGCC     | 0 | 0.27693045 | 7.04E-11 | 1.28E-06   | 0.751 | 0.645 |
| EPYC     | 0 | 0.27665264 | 5.48E-19 | 1.00E-14   | 0.206 | 0.036 |
| NDIFP1   | 0 | 0.27652776 | 4.01E-15 | 7.31E-11   | 0.717 | 0.565 |
| SLC7A2   | 0 | 0.27604878 | 3.52E-26 | 6.42E-22   | 0.236 | 0.026 |
| NOL7     | 0 | 0.2753535  | 6.06E-13 | 1.11E-08   | 0.697 | 0.549 |
| VIMP     | 0 | 0.27521007 | 2.63E-13 | 4.79E-09   | 0.708 | 0.537 |
| RAB7A    | 0 | 0.2751193  | 2.12E-12 | 3.87E-08   | 0.704 | 0.577 |
| CNIH1    | 0 | 0.27509962 | 1.11E-16 | 2.03E-12   | 0.809 | 0.67  |

|               |   |            |          |            |       |       |
|---------------|---|------------|----------|------------|-------|-------|
| PRR34-AS1     | 0 | 0.27415588 | 8.50E-24 | 1.55E-19   | 0.329 | 0.09  |
| CLIC4         | 0 | 0.27403385 | 5.29E-13 | 9.65E-09   | 0.529 | 0.36  |
| TNFSF11       | 0 | 0.27311992 | 9.10E-30 | 1.66E-25   | 0.209 | 0.003 |
| SOX9          | 0 | 0.27287785 | 2.40E-08 | 0.00043773 | 0.659 | 0.578 |
| SLC20A1       | 0 | 0.27134106 | 5.75E-15 | 1.05E-10   | 0.292 | 0.114 |
| KAT5          | 0 | 0.26991296 | 1.75E-14 | 3.19E-10   | 0.43  | 0.239 |
| PAPOLA        | 0 | 0.26964404 | 1.05E-13 | 1.91E-09   | 0.688 | 0.54  |
| EIF1B         | 0 | 0.26939441 | 3.68E-15 | 6.71E-11   | 0.769 | 0.661 |
| DDX41         | 0 | 0.26922473 | 1.79E-15 | 3.26E-11   | 0.319 | 0.133 |
| RP11-125O18.1 | 0 | 0.26857677 | 7.48E-15 | 1.37E-10   | 0.271 | 0.096 |
| SAT1          | 0 | 0.26776057 | 6.00E-13 | 1.09E-08   | 0.98  | 0.928 |
| RORA          | 0 | 0.26698664 | 7.24E-15 | 1.32E-10   | 0.509 | 0.312 |
| RNF114        | 0 | 0.26591498 | 3.52E-11 | 6.42E-07   | 0.625 | 0.509 |
| MOB4          | 0 | 0.2653403  | 6.44E-17 | 1.17E-12   | 0.413 | 0.203 |
| ANKRD37       | 0 | 0.26377352 | 2.57E-10 | 4.70E-06   | 0.43  | 0.274 |
| MRPL14        | 0 | 0.26299951 | 2.84E-13 | 5.18E-09   | 0.616 | 0.454 |
| RAB14         | 0 | 0.26249707 | 4.46E-11 | 8.14E-07   | 0.478 | 0.334 |
| SFT2D1        | 0 | 0.26112793 | 1.09E-11 | 1.98E-07   | 0.727 | 0.616 |
| RTN4          | 0 | 0.26009026 | 6.03E-11 | 1.10E-06   | 0.653 | 0.525 |
| POMP          | 0 | 0.25971375 | 4.10E-16 | 7.49E-12   | 0.87  | 0.783 |
| TIMM10B       | 0 | 0.25965402 | 7.39E-18 | 1.35E-13   | 0.383 | 0.165 |
| WBP5          | 0 | 0.25963073 | 1.80E-09 | 3.29E-05   | 0.74  | 0.657 |
| CCND1         | 0 | 0.25957413 | 7.36E-22 | 1.34E-17   | 0.283 | 0.069 |
| OAZ1          | 0 | 0.25932842 | 8.97E-23 | 1.64E-18   | 0.998 | 0.99  |
| CTTN          | 0 | 0.2593066  | 2.65E-09 | 4.83E-05   | 0.451 | 0.312 |
| TMSB10        | 0 | 0.25902604 | 1.29E-08 | 0.00023614 | 0.993 | 0.983 |
| TNS1          | 0 | 0.25631973 | 8.51E-18 | 1.55E-13   | 0.352 | 0.136 |
| TVP23B        | 0 | 0.25624256 | 2.90E-16 | 5.29E-12   | 0.442 | 0.227 |
| GPRC5A        | 0 | 0.2559583  | 4.73E-14 | 8.63E-10   | 0.314 | 0.136 |
| AVPI1         | 0 | 0.25557356 | 3.35E-11 | 6.12E-07   | 0.365 | 0.201 |
| DNAJB1        | 0 | 0.25470229 | 1.38E-06 | 0.02522532 | 0.307 | 0.194 |
| MGST1         | 0 | 0.2542484  | 1.41E-11 | 2.57E-07   | 0.442 | 0.256 |
| MTHFD2        | 0 | 0.25357654 | 7.79E-07 | 0.01420537 | 0.626 | 0.556 |
| SRSF1         | 0 | 0.25308436 | 4.04E-10 | 7.37E-06   | 0.44  | 0.293 |
| SDHA          | 0 | 0.25264387 | 2.89E-13 | 5.28E-09   | 0.357 | 0.177 |
| CHMP4B        | 0 | 0.25244758 | 1.90E-12 | 3.46E-08   | 0.69  | 0.547 |
| EIF4A2        | 0 | 0.251918   | 8.23E-20 | 1.50E-15   | 0.995 | 1     |
| BTG3          | 0 | 0.25152322 | 5.75E-11 | 1.05E-06   | 0.435 | 0.274 |
| TNFAIP6       | 0 | 0.25105006 | 3.37E-21 | 6.15E-17   | 0.161 | 0.007 |

|            |   |            |          |            |       |       |
|------------|---|------------|----------|------------|-------|-------|
| PTX3       | 0 | 0.2506984  | 3.14E-10 | 5.74E-06   | 0.116 | 0.022 |
| ENAH       | 0 | -0.2500025 | 3.79E-14 | 6.92E-10   | 0.182 | 0.373 |
| IFI27L2    | 0 | -0.2501032 | 2.11E-13 | 3.86E-09   | 0.767 | 0.892 |
| MRPS21     | 0 | -0.251191  | 1.72E-16 | 3.14E-12   | 0.83  | 0.935 |
| MZT2B      | 0 | -0.2527523 | 4.45E-19 | 8.12E-15   | 0.915 | 0.983 |
| ATP5L      | 0 | -0.2528027 | 3.35E-18 | 6.12E-14   | 0.935 | 0.986 |
| DNAJC1     | 0 | -0.25304   | 5.51E-13 | 1.01E-08   | 0.245 | 0.423 |
| DIO2       | 0 | -0.2542139 | 2.78E-12 | 5.07E-08   | 0.116 | 0.277 |
| PTPRD-AS1  | 0 | -0.2546948 | 1.90E-13 | 3.46E-09   | 0.323 | 0.516 |
| ATPIF1     | 0 | -0.2547331 | 1.93E-13 | 3.53E-09   | 0.556 | 0.744 |
| GOLIM4     | 0 | -0.2555817 | 1.91E-08 | 0.00034921 | 0.287 | 0.437 |
| DAAM1      | 0 | -0.2558896 | 9.83E-14 | 1.79E-09   | 0.193 | 0.382 |
| EIF3M      | 0 | -0.2564523 | 2.24E-14 | 4.08E-10   | 0.587 | 0.756 |
| C12orf57   | 0 | -0.2566581 | 1.75E-20 | 3.18E-16   | 0.951 | 0.988 |
| SLC44A1    | 0 | -0.2579536 | 1.94E-14 | 3.54E-10   | 0.171 | 0.363 |
| NFIC       | 0 | -0.2587521 | 2.64E-12 | 4.82E-08   | 0.296 | 0.468 |
| RPL5       | 0 | -0.2591308 | 1.33E-48 | 2.43E-44   | 1     | 1     |
| MTDH       | 0 | -0.2593068 | 9.91E-14 | 1.81E-09   | 0.538 | 0.702 |
| PABPC4     | 0 | -0.259677  | 4.23E-11 | 7.72E-07   | 0.542 | 0.685 |
| KRT18      | 0 | -0.2598986 | 3.50E-13 | 6.39E-09   | 0.193 | 0.38  |
| EFNA1      | 0 | -0.2603807 | 1.03E-16 | 1.88E-12   | 0.218 | 0.444 |
| NACA       | 0 | -0.2629044 | 1.45E-40 | 2.65E-36   | 1     | 1     |
| AC005152.3 | 0 | -0.2629172 | 1.16E-27 | 2.12E-23   | 0.032 | 0.263 |
| SERPIN1    | 0 | -0.2629803 | 7.84E-09 | 0.00014312 | 0.13  | 0.258 |
| ANG        | 0 | -0.2634136 | 4.02E-17 | 7.33E-13   | 0.224 | 0.448 |
| FCGRT      | 0 | -0.263836  | 1.03E-12 | 1.88E-08   | 0.507 | 0.652 |
| COX7C      | 0 | -0.2655107 | 1.49E-39 | 2.71E-35   | 1     | 1     |
| PPIC       | 0 | -0.2655539 | 1.50E-14 | 2.73E-10   | 0.166 | 0.356 |
| CCNG1      | 0 | -0.2663217 | 1.10E-15 | 2.00E-11   | 0.424 | 0.635 |
| H1FX       | 0 | -0.2667846 | 6.10E-19 | 1.11E-14   | 0.128 | 0.349 |
| PLPP1      | 0 | -0.267141  | 7.90E-17 | 1.44E-12   | 0.099 | 0.287 |
| MAGED1     | 0 | -0.267365  | 2.65E-11 | 4.83E-07   | 0.09  | 0.234 |
| ATP5H      | 0 | -0.267495  | 9.21E-16 | 1.68E-11   | 0.612 | 0.762 |
| RPS15A     | 0 | -0.2680127 | 2.24E-51 | 4.09E-47   | 1     | 1     |
| ENPP1      | 0 | -0.2683314 | 4.75E-20 | 8.67E-16   | 0.119 | 0.348 |
| RARRES3    | 0 | -0.2707128 | 6.86E-26 | 1.25E-21   | 0.054 | 0.289 |
| MIA        | 0 | -0.27207   | 2.53E-11 | 4.62E-07   | 0.939 | 0.966 |
| BSG        | 0 | -0.2722308 | 2.60E-16 | 4.74E-12   | 0.561 | 0.759 |
| PRKCSH     | 0 | -0.2723875 | 9.29E-14 | 1.70E-09   | 0.327 | 0.504 |

|               |   |            |          |          |       |       |
|---------------|---|------------|----------|----------|-------|-------|
| MPST          | 0 | -0.2736187 | 5.16E-20 | 9.41E-16 | 0.327 | 0.578 |
| RPS21         | 0 | -0.2740218 | 2.44E-41 | 4.46E-37 | 0.998 | 1     |
| RPA3          | 0 | -0.2749046 | 9.02E-16 | 1.65E-11 | 0.384 | 0.589 |
| C1orf21       | 0 | -0.2752225 | 5.13E-18 | 9.35E-14 | 0.408 | 0.642 |
| RPS4X         | 0 | -0.2757485 | 4.63E-66 | 8.46E-62 | 1     | 1     |
| PLP2          | 0 | -0.2764062 | 6.10E-17 | 1.11E-12 | 0.722 | 0.88  |
| RBP4          | 0 | -0.2768237 | 4.12E-16 | 7.52E-12 | 0.617 | 0.818 |
| SNRPE         | 0 | -0.2773969 | 1.72E-15 | 3.13E-11 | 0.606 | 0.757 |
| PPA1          | 0 | -0.277767  | 1.37E-16 | 2.49E-12 | 0.356 | 0.563 |
| FAM200B       | 0 | -0.2781441 | 4.17E-16 | 7.62E-12 | 0.258 | 0.468 |
| SNRPA         | 0 | -0.2787717 | 9.76E-22 | 1.78E-17 | 0.164 | 0.413 |
| AP2M1         | 0 | -0.2798015 | 2.50E-14 | 4.57E-10 | 0.464 | 0.625 |
| MOXD1         | 0 | -0.280918  | 1.91E-19 | 3.48E-15 | 0.106 | 0.322 |
| RP11-983P16.4 | 0 | -0.2809693 | 2.76E-20 | 5.04E-16 | 0.285 | 0.554 |
| RPS3          | 0 | -0.2816281 | 3.37E-68 | 6.15E-64 | 1     | 1     |
| SOCS3         | 0 | -0.2817068 | 2.21E-21 | 4.03E-17 | 0.13  | 0.372 |
| RPL11         | 0 | -0.2824429 | 1.82E-70 | 3.32E-66 | 1     | 1     |
| RPL28         | 0 | -0.2825902 | 2.11E-58 | 3.84E-54 | 1     | 1     |
| RPL12         | 0 | -0.2831471 | 5.77E-53 | 1.05E-48 | 1     | 1     |
| GYPC          | 0 | -0.2832294 | 9.79E-13 | 1.79E-08 | 0.518 | 0.685 |
| ARPC1A        | 0 | -0.2834029 | 1.31E-16 | 2.39E-12 | 0.365 | 0.583 |
| MSRB1         | 0 | -0.2834893 | 1.23E-19 | 2.24E-15 | 0.137 | 0.361 |
| HSPD1         | 0 | -0.2867537 | 1.65E-13 | 3.02E-09 | 0.57  | 0.699 |
| TCEAL8        | 0 | -0.2875418 | 1.13E-19 | 2.06E-15 | 0.65  | 0.842 |
| GLTSCR2       | 0 | -0.2891186 | 1.16E-24 | 2.12E-20 | 0.937 | 0.981 |
| RPL15         | 0 | -0.2897806 | 1.23E-83 | 2.25E-79 | 1     | 1     |
| SNAI2         | 0 | -0.28988   | 1.57E-10 | 2.87E-06 | 0.31  | 0.482 |
| SNHG8         | 0 | -0.2899284 | 3.66E-20 | 6.67E-16 | 0.821 | 0.95  |
| PPT1          | 0 | -0.2900564 | 6.65E-18 | 1.21E-13 | 0.251 | 0.478 |
| ST13          | 0 | -0.290139  | 8.35E-26 | 1.52E-21 | 0.962 | 0.99  |
| DBP           | 0 | -0.2911877 | 2.24E-17 | 4.09E-13 | 0.186 | 0.403 |
| PDLIM4        | 0 | -0.2912296 | 4.06E-14 | 7.42E-10 | 0.76  | 0.854 |
| ANGPTL2       | 0 | -0.2918173 | 1.81E-14 | 3.30E-10 | 0.366 | 0.568 |
| CHMP3         | 0 | -0.2929285 | 1.28E-16 | 2.34E-12 | 0.437 | 0.654 |
| CRYAB         | 0 | -0.2934538 | 5.15E-10 | 9.39E-06 | 0.626 | 0.787 |
| RPL27A        | 0 | -0.2951791 | 4.22E-58 | 7.71E-54 | 1     | 1     |
| BEX2          | 0 | -0.2960886 | 1.31E-19 | 2.39E-15 | 0.247 | 0.501 |
| ITM2A         | 0 | -0.2966835 | 1.30E-18 | 2.37E-14 | 0.345 | 0.597 |
| KHDRBS3       | 0 | -0.2994683 | 9.90E-29 | 1.81E-24 | 0.018 | 0.241 |



|              |   |            |          |          |       |       |
|--------------|---|------------|----------|----------|-------|-------|
| ERGIC3       | 0 | -0.3004659 | 2.11E-19 | 3.85E-15 | 0.722 | 0.892 |
| RNF130       | 0 | -0.3015111 | 1.42E-18 | 2.59E-14 | 0.477 | 0.695 |
| RPL22        | 0 | -0.3015537 | 1.28E-55 | 2.33E-51 | 1     | 1     |
| ZNF90        | 0 | -0.3021543 | 3.86E-19 | 7.05E-15 | 0.518 | 0.704 |
| CMB9-22P13.1 | 0 | -0.3025595 | 9.01E-17 | 1.64E-12 | 0.321 | 0.535 |
| HSPB1        | 0 | -0.3025602 | 2.88E-17 | 5.25E-13 | 0.579 | 0.778 |
| FBXO2        | 0 | -0.3046345 | 2.29E-19 | 4.18E-15 | 0.659 | 0.866 |
| GALNT15      | 0 | -0.3046345 | 6.17E-25 | 1.13E-20 | 0.106 | 0.365 |
| NINJ1        | 0 | -0.3051826 | 1.26E-21 | 2.30E-17 | 0.466 | 0.73  |
| SSR4         | 0 | -0.3061951 | 8.42E-18 | 1.54E-13 | 0.903 | 0.95  |
| C19orf43     | 0 | -0.3074905 | 3.66E-24 | 6.68E-20 | 0.794 | 0.938 |
| GSTP1        | 0 | -0.3083137 | 1.76E-26 | 3.21E-22 | 0.912 | 0.976 |
| TSPO         | 0 | -0.3083398 | 3.73E-22 | 6.81E-18 | 0.706 | 0.895 |
| SPINT2       | 0 | -0.3085165 | 2.16E-22 | 3.95E-18 | 0.204 | 0.466 |
| COX7A2L      | 0 | -0.308926  | 1.45E-25 | 2.65E-21 | 0.859 | 0.95  |
| RPS24        | 0 | -0.3093853 | 2.71E-51 | 4.94E-47 | 1     | 1     |
| FXVD6        | 0 | -0.3094189 | 3.68E-23 | 6.71E-19 | 0.702 | 0.902 |
| EIF3F        | 0 | -0.3099469 | 1.69E-23 | 3.08E-19 | 0.805 | 0.91  |
| ATP5A1       | 0 | -0.3102596 | 7.69E-20 | 1.40E-15 | 0.489 | 0.699 |
| VCAN         | 0 | -0.3109459 | 2.84E-09 | 5.18E-05 | 0.292 | 0.43  |
| RPL39        | 0 | -0.3116243 | 4.78E-59 | 8.73E-55 | 1     | 1     |
| LITAF        | 0 | -0.3117201 | 6.70E-20 | 1.22E-15 | 0.357 | 0.592 |
| NBEAL1       | 0 | -0.3119976 | 3.19E-31 | 5.82E-27 | 0.986 | 0.995 |
| DNM3OS       | 0 | -0.3121658 | 3.12E-20 | 5.70E-16 | 0.13  | 0.36  |
| TTC3         | 0 | -0.3125165 | 2.09E-21 | 3.82E-17 | 0.561 | 0.809 |
| RPS9         | 0 | -0.3128804 | 4.83E-74 | 8.80E-70 | 1     | 1     |
| PIGP         | 0 | -0.3129466 | 2.25E-19 | 4.11E-15 | 0.514 | 0.728 |
| EIF2S3       | 0 | -0.3140207 | 5.37E-17 | 9.80E-13 | 0.527 | 0.702 |
| RPS6         | 0 | -0.3158735 | 3.74E-87 | 6.82E-83 | 1     | 1     |
| SP5          | 0 | -0.3161039 | 2.68E-29 | 4.88E-25 | 0     | 0.205 |
| ATP5D        | 0 | -0.317219  | 5.18E-25 | 9.45E-21 | 0.834 | 0.938 |
| SDF4         | 0 | -0.3188984 | 4.76E-20 | 8.69E-16 | 0.505 | 0.756 |
| RPL35A       | 0 | -0.3211479 | 1.08E-73 | 1.97E-69 | 1     | 1     |
| RPL36AL      | 0 | -0.3235237 | 3.02E-47 | 5.50E-43 | 1     | 1     |
| MYLK         | 0 | -0.3243686 | 3.42E-21 | 6.24E-17 | 0.097 | 0.32  |
| IGBP1        | 0 | -0.3245853 | 4.08E-20 | 7.44E-16 | 0.619 | 0.788 |
| EIF3E        | 0 | -0.324623  | 1.21E-39 | 2.20E-35 | 1     | 1     |
| RPS25        | 0 | -0.325148  | 1.01E-80 | 1.85E-76 | 1     | 1     |
| RBMX         | 0 | -0.3270604 | 9.04E-20 | 1.65E-15 | 0.682 | 0.835 |

|            |   |            |          |          |       |       |
|------------|---|------------|----------|----------|-------|-------|
| AHNAK2     | 0 | -0.328842  | 1.32E-17 | 2.40E-13 | 0.296 | 0.52  |
| COMMD6     | 0 | -0.3289618 | 7.04E-40 | 1.28E-35 | 1     | 1     |
| MYL12B     | 0 | -0.3302377 | 1.17E-21 | 2.14E-17 | 0.439 | 0.67  |
| LDHB       | 0 | -0.3303779 | 9.10E-24 | 1.66E-19 | 0.745 | 0.888 |
| RPS27      | 0 | -0.3312591 | 9.34E-90 | 1.70E-85 | 1     | 1     |
| HERPUD1    | 0 | -0.3329362 | 2.24E-15 | 4.08E-11 | 0.394 | 0.578 |
| ITM2C      | 0 | -0.3330021 | 1.96E-20 | 3.58E-16 | 0.318 | 0.57  |
| AC003090.1 | 0 | -0.3333594 | 4.62E-34 | 8.43E-30 | 0.04  | 0.317 |
| PDE4DIP    | 0 | -0.3335863 | 1.32E-21 | 2.40E-17 | 0.273 | 0.525 |
| TUBB2B     | 0 | -0.3337498 | 3.48E-14 | 6.35E-10 | 0.244 | 0.437 |
| EID1       | 0 | -0.3345177 | 3.40E-32 | 6.21E-28 | 0.919 | 0.985 |
| SLC29A1    | 0 | -0.3349206 | 1.25E-23 | 2.28E-19 | 0.245 | 0.522 |
| RPS12      | 0 | -0.3364233 | 8.55E-69 | 1.56E-64 | 1     | 1     |
| RPL7A      | 0 | -0.3379401 | 7.16E-76 | 1.31E-71 | 1     | 1     |
| ILF3-AS1   | 0 | -0.3387185 | 6.40E-24 | 1.17E-19 | 0.209 | 0.472 |
| KRT8       | 0 | -0.338758  | 4.03E-20 | 7.36E-16 | 0.204 | 0.444 |
| CUTA       | 0 | -0.3390564 | 2.80E-26 | 5.11E-22 | 0.742 | 0.914 |
| NUPR1      | 0 | -0.3406909 | 1.70E-16 | 3.10E-12 | 0.978 | 0.991 |
| LINC01503  | 0 | -0.3409566 | 4.95E-16 | 9.03E-12 | 0.244 | 0.446 |
| RPL27      | 0 | -0.3425985 | 4.83E-53 | 8.82E-49 | 1     | 1     |
| RPL35      | 0 | -0.3426458 | 1.18E-73 | 2.15E-69 | 1     | 1     |
| CHID1      | 0 | -0.3460536 | 7.17E-20 | 1.31E-15 | 0.415 | 0.625 |
| LTA4H      | 0 | -0.3476435 | 6.33E-23 | 1.16E-18 | 0.522 | 0.721 |
| RPL18A     | 0 | -0.3483844 | 6.39E-83 | 1.17E-78 | 1     | 1     |
| SSPN       | 0 | -0.3485477 | 3.27E-25 | 5.96E-21 | 0.137 | 0.403 |
| MALAT1     | 0 | -0.3491655 | 4.47E-22 | 8.15E-18 | 1     | 1     |
| RPL13      | 0 | -0.3493834 | 5.49E-99 | 1.00E-94 | 1     | 1     |
| PDIA6      | 0 | -0.3510824 | 4.16E-20 | 7.59E-16 | 0.426 | 0.666 |
| S100A13    | 0 | -0.3518527 | 1.03E-38 | 1.88E-34 | 0.978 | 1     |
| DMKN       | 0 | -0.3520139 | 6.41E-24 | 1.17E-19 | 0.256 | 0.525 |
| CRIP2      | 0 | -0.3526196 | 3.19E-23 | 5.82E-19 | 0.217 | 0.472 |
| UQCRH      | 0 | -0.3540857 | 6.75E-36 | 1.23E-31 | 0.926 | 0.981 |
| FHL1       | 0 | -0.3544008 | 4.91E-18 | 8.97E-14 | 0.287 | 0.503 |
| PPIA       | 0 | -0.3570007 | 1.93E-37 | 3.51E-33 | 0.93  | 0.986 |
| RPS5       | 0 | -0.3573963 | 1.17E-76 | 2.14E-72 | 1     | 1     |
| ZBTB20     | 0 | -0.357879  | 1.63E-25 | 2.97E-21 | 0.2   | 0.472 |
| UBA52      | 0 | -0.3586053 | 1.68E-78 | 3.06E-74 | 1     | 1     |
| HDLBP      | 0 | -0.3586937 | 1.06E-20 | 1.94E-16 | 0.363 | 0.589 |
| RPL37A     | 0 | -0.3607762 | 8.20E-94 | 1.50E-89 | 1     | 1     |

|          |   |            |           |           |       |       |
|----------|---|------------|-----------|-----------|-------|-------|
| RPLP1    | 0 | -0.3616779 | 3.47E-96  | 6.34E-92  | 1     | 1     |
| YBX1     | 0 | -0.3617449 | 4.09E-42  | 7.47E-38  | 0.971 | 1     |
| PTRF     | 0 | -0.3646415 | 2.33E-24  | 4.26E-20  | 0.319 | 0.575 |
| RPL29    | 0 | -0.3663656 | 9.31E-81  | 1.70E-76  | 1     | 1     |
| FMOD     | 0 | -0.367116  | 3.61E-30  | 6.58E-26  | 0.912 | 0.981 |
| HMG2     | 0 | -0.3683847 | 7.51E-31  | 1.37E-26  | 0.863 | 0.978 |
| BRK1     | 0 | -0.3686013 | 1.07E-31  | 1.95E-27  | 0.749 | 0.94  |
| RPL3     | 0 | -0.3688829 | 5.20E-86  | 9.49E-82  | 1     | 1     |
| PLA2G16  | 0 | -0.3712764 | 1.09E-24  | 1.98E-20  | 0.213 | 0.478 |
| GNAS     | 0 | -0.3717164 | 2.88E-27  | 5.25E-23  | 0.477 | 0.726 |
| PTMS     | 0 | -0.3721142 | 2.75E-29  | 5.02E-25  | 0.502 | 0.795 |
| EIF3K    | 0 | -0.3744505 | 3.73E-32  | 6.80E-28  | 0.787 | 0.943 |
| NGFRAP1  | 0 | -0.3746134 | 4.78E-28  | 8.72E-24  | 0.764 | 0.947 |
| PSMA7    | 0 | -0.3751671 | 1.12E-29  | 2.05E-25  | 0.785 | 0.919 |
| RPL21    | 0 | -0.375305  | 3.98E-107 | 7.26E-103 | 1     | 1     |
| NFIA     | 0 | -0.3779827 | 7.83E-29  | 1.43E-24  | 0.188 | 0.478 |
| ATP5O    | 0 | -0.3781198 | 2.94E-29  | 5.36E-25  | 0.736 | 0.907 |
| PRCP     | 0 | -0.3806253 | 1.29E-35  | 2.36E-31  | 0.112 | 0.435 |
| RPS18    | 0 | -0.3810791 | 7.07E-97  | 1.29E-92  | 1     | 1     |
| RPL31    | 0 | -0.3821947 | 1.96E-79  | 3.58E-75  | 1     | 1     |
| HOXC10   | 0 | -0.3822607 | 1.76E-25  | 3.21E-21  | 0.65  | 0.847 |
| RPS7     | 0 | -0.385376  | 6.89E-79  | 1.26E-74  | 1     | 1     |
| PCBP2    | 0 | -0.3853832 | 1.36E-39  | 2.48E-35  | 0.897 | 0.981 |
| PSAP     | 0 | -0.3882713 | 1.00E-31  | 1.83E-27  | 0.899 | 0.976 |
| HSP90AB1 | 0 | -0.389608  | 9.21E-35  | 1.68E-30  | 0.968 | 0.993 |
| EIF3D    | 0 | -0.3904094 | 8.65E-33  | 1.58E-28  | 0.738 | 0.902 |
| RABAC1   | 0 | -0.3924675 | 6.54E-33  | 1.19E-28  | 0.675 | 0.885 |
| MYL6     | 0 | -0.3929202 | 4.61E-36  | 8.40E-32  | 0.839 | 0.972 |
| NMRK1    | 0 | -0.3934604 | 2.11E-31  | 3.85E-27  | 0.255 | 0.561 |
| RPL19    | 0 | -0.3941651 | 9.95E-117 | 1.82E-112 | 1     | 1     |
| CYBRD1   | 0 | -0.3952185 | 9.16E-28  | 1.67E-23  | 0.484 | 0.728 |
| TOMM7    | 0 | -0.3972475 | 2.23E-86  | 4.08E-82  | 1     | 1     |
| PLXDC2   | 0 | -0.4019937 | 3.09E-24  | 5.65E-20  | 0.466 | 0.682 |
| RGS10    | 0 | -0.4032317 | 4.36E-29  | 7.96E-25  | 0.511 | 0.744 |
| ATP5G2   | 0 | -0.4038161 | 8.97E-55  | 1.64E-50  | 0.996 | 1     |
| DDR2     | 0 | -0.4043991 | 1.05E-21  | 1.92E-17  | 0.397 | 0.625 |
| RPL8     | 0 | -0.4062619 | 1.94E-105 | 3.54E-101 | 1     | 1     |
| TPM1     | 0 | -0.4075856 | 6.09E-18  | 1.11E-13  | 0.392 | 0.596 |
| LRRC2    | 0 | -0.4151504 | 5.69E-36  | 1.04E-31  | 0.144 | 0.48  |

|          |   |            |           |           |       |       |
|----------|---|------------|-----------|-----------|-------|-------|
| S100A1   | 0 | -0.4156035 | 3.87E-44  | 7.06E-40  | 0.996 | 1     |
| SLC25A3  | 0 | -0.4160111 | 4.80E-40  | 8.75E-36  | 0.845 | 0.974 |
| CPE      | 0 | -0.4172918 | 8.46E-30  | 1.54E-25  | 0.569 | 0.826 |
| BTF3     | 0 | -0.4186172 | 1.66E-71  | 3.04E-67  | 0.995 | 1     |
| NPM1     | 0 | -0.4189786 | 4.93E-62  | 8.99E-58  | 1     | 1     |
| RPL10    | 0 | -0.4225206 | 4.20E-115 | 7.67E-111 | 1     | 1     |
| RPL14    | 0 | -0.4254124 | 1.92E-108 | 3.50E-104 | 1     | 1     |
| PLAC9    | 0 | -0.4254514 | 1.19E-31  | 2.18E-27  | 0.653 | 0.917 |
| RPS23    | 0 | -0.4257551 | 1.14E-109 | 2.07E-105 | 1     | 1     |
| THY1     | 0 | -0.4276627 | 3.73E-28  | 6.80E-24  | 0.099 | 0.367 |
| RPL13A   | 0 | -0.4303259 | 4.71E-127 | 8.60E-123 | 1     | 1     |
| ID1      | 0 | -0.4318863 | 4.91E-21  | 8.96E-17  | 0.395 | 0.68  |
| EIF2A    | 0 | -0.437178  | 3.98E-37  | 7.26E-33  | 0.684 | 0.909 |
| CFH      | 0 | -0.437711  | 2.79E-18  | 5.09E-14  | 0.125 | 0.341 |
| OXA1L    | 0 | -0.4380044 | 1.11E-34  | 2.03E-30  | 0.48  | 0.749 |
| RPL37    | 0 | -0.4383207 | 1.43E-102 | 2.62E-98  | 1     | 1     |
| NDUFA11  | 0 | -0.4411281 | 1.58E-40  | 2.88E-36  | 0.749 | 0.928 |
| HINT1    | 0 | -0.4436172 | 6.80E-60  | 1.24E-55  | 0.958 | 0.998 |
| RPL30    | 0 | -0.4446135 | 2.20E-110 | 4.01E-106 | 1     | 1     |
| RPL9     | 0 | -0.4464657 | 2.98E-114 | 5.44E-110 | 1     | 1     |
| ARHGAP29 | 0 | -0.4464994 | 1.75E-26  | 3.18E-22  | 0.273 | 0.542 |
| RPS13    | 0 | -0.447895  | 1.33E-105 | 2.43E-101 | 1     | 1     |
| RPSA     | 0 | -0.4496293 | 2.57E-80  | 4.69E-76  | 1     | 1     |
| RPS27A   | 0 | -0.4544651 | 4.39E-123 | 8.01E-119 | 1     | 1     |
| NAP1L1   | 0 | -0.4596825 | 1.44E-57  | 2.64E-53  | 0.951 | 0.995 |
| RPS2     | 0 | -0.4597098 | 1.86E-119 | 3.39E-115 | 1     | 1     |
| LECT1    | 0 | -0.4685133 | 4.87E-22  | 8.89E-18  | 0.783 | 0.9   |
| ATRNL1   | 0 | -0.4717558 | 2.17E-42  | 3.96E-38  | 0.088 | 0.437 |
| COL9A3   | 0 | -0.473534  | 8.86E-24  | 1.62E-19  | 0.504 | 0.759 |
| SSR2     | 0 | -0.4746393 | 2.37E-48  | 4.32E-44  | 0.731 | 0.933 |
| GAS6     | 0 | -0.4782011 | 3.68E-33  | 6.71E-29  | 0.269 | 0.575 |
| CEBPD    | 0 | -0.4806061 | 3.74E-30  | 6.82E-26  | 0.773 | 0.94  |
| UQCRB    | 0 | -0.4902402 | 8.61E-58  | 1.57E-53  | 0.966 | 1     |
| CD99     | 0 | -0.4944199 | 1.38E-49  | 2.52E-45  | 0.883 | 0.972 |
| TSC22D1  | 0 | -0.4972642 | 1.55E-25  | 2.82E-21  | 0.579 | 0.823 |
| H3F3A    | 0 | -0.5003933 | 7.22E-56  | 1.32E-51  | 0.903 | 0.986 |
| GREM1    | 0 | -0.5007418 | 3.63E-31  | 6.62E-27  | 0.011 | 0.241 |
| CTSC     | 0 | -0.5018296 | 4.56E-17  | 8.33E-13  | 0.2   | 0.418 |
| SEC11A   | 0 | -0.5057992 | 3.63E-54  | 6.63E-50  | 0.783 | 0.967 |

|          |   |            |           |           |       |       |
|----------|---|------------|-----------|-----------|-------|-------|
| RPL23A   | 0 | -0.5093862 | 2.91E-135 | 5.31E-131 | 1     | 1     |
| CYR61    | 0 | -0.5126095 | 3.47E-29  | 6.32E-25  | 0.15  | 0.451 |
| PABPC1   | 0 | -0.513342  | 3.07E-61  | 5.60E-57  | 0.877 | 0.988 |
| HLA-B    | 0 | -0.5145525 | 3.09E-38  | 5.63E-34  | 0.718 | 0.919 |
| SERPINA5 | 0 | -0.5161674 | 3.05E-42  | 5.56E-38  | 0.253 | 0.632 |
| RPL34    | 0 | -0.5164448 | 2.81E-128 | 5.12E-124 | 1     | 1     |
| RPS29    | 0 | -0.5166689 | 7.53E-127 | 1.37E-122 | 1     | 1     |
| CHRD2    | 0 | -0.5174182 | 1.85E-26  | 3.37E-22  | 0.135 | 0.403 |
| HLA-A    | 0 | -0.5190942 | 9.16E-37  | 1.67E-32  | 0.87  | 0.981 |
| RPL23    | 0 | -0.5228855 | 4.99E-97  | 9.10E-93  | 0.998 | 1     |
| TCF4     | 0 | -0.5230796 | 1.24E-39  | 2.27E-35  | 0.224 | 0.577 |
| RPS3A    | 0 | -0.5241873 | 3.26E-138 | 5.95E-134 | 1     | 1     |
| PEBP1    | 0 | -0.5258809 | 3.60E-55  | 6.57E-51  | 0.681 | 0.94  |
| EEF1B2   | 0 | -0.527837  | 7.71E-77  | 1.41E-72  | 0.987 | 0.997 |
| ISLR     | 0 | -0.5338022 | 7.47E-48  | 1.36E-43  | 0.166 | 0.558 |
| CCDC102B | 0 | -0.5339761 | 1.32E-58  | 2.40E-54  | 0.029 | 0.437 |
| CP       | 0 | -0.5448195 | 4.66E-48  | 8.50E-44  | 0.599 | 0.941 |
| MT-ND4   | 0 | -0.5451784 | 1.56E-19  | 2.84E-15  | 0.955 | 0.905 |
| RPS17    | 0 | -0.5465259 | 3.51E-118 | 6.40E-114 | 1     | 1     |
| BGN      | 0 | -0.5502913 | 9.15E-58  | 1.67E-53  | 0.986 | 1     |
| HIST1H4C | 0 | -0.551793  | 1.97E-37  | 3.59E-33  | 0.307 | 0.633 |
| TPT1     | 0 | -0.5520375 | 1.21E-122 | 2.21E-118 | 1     | 1     |
| HNRNPA1  | 0 | -0.5553224 | 5.76E-76  | 1.05E-71  | 0.996 | 1     |
| RPS16    | 0 | -0.5555843 | 1.52E-132 | 2.78E-128 | 1     | 1     |
| TUBB     | 0 | -0.55633   | 4.27E-52  | 7.80E-48  | 0.668 | 0.917 |
| RPLP2    | 0 | -0.5574053 | 3.62E-139 | 6.61E-135 | 1     | 1     |
| SLC14A1  | 0 | -0.5593469 | 1.39E-50  | 2.54E-46  | 0.191 | 0.599 |
| CRISPLD1 | 0 | -0.5670895 | 7.00E-43  | 1.28E-38  | 0.047 | 0.377 |
| FTH1     | 0 | -0.5674418 | 2.97E-76  | 5.42E-72  | 1     | 1     |
| EIF4B    | 0 | -0.5694374 | 1.05E-61  | 1.92E-57  | 0.832 | 0.972 |
| EIF3L    | 0 | -0.5731485 | 1.19E-70  | 2.18E-66  | 0.816 | 0.979 |
| HLA-C    | 0 | -0.5742464 | 3.23E-50  | 5.89E-46  | 0.836 | 0.966 |
| CD9      | 0 | -0.5773675 | 5.87E-45  | 1.07E-40  | 0.291 | 0.661 |
| SSR3     | 0 | -0.5836327 | 5.28E-52  | 9.64E-48  | 0.762 | 0.957 |
| RPL18    | 0 | -0.585663  | 1.47E-137 | 2.69E-133 | 1     | 1     |
| NPC2     | 0 | -0.5948873 | 5.08E-90  | 9.27E-86  | 0.977 | 1     |
| MGP      | 0 | -0.5954236 | 1.14E-37  | 2.07E-33  | 0.998 | 1     |
| RPL7     | 0 | -0.6014448 | 4.29E-125 | 7.84E-121 | 1     | 1     |
| INHBA    | 0 | -0.6015266 | 4.24E-37  | 7.73E-33  | 0.195 | 0.525 |

|          |   |            |           |           |       |       |
|----------|---|------------|-----------|-----------|-------|-------|
| ACAN     | 0 | -0.606664  | 3.22E-61  | 5.88E-57  | 0.924 | 0.998 |
| CTGF     | 0 | -0.6084944 | 1.19E-29  | 2.17E-25  | 0.206 | 0.506 |
| EEF2     | 0 | -0.6130293 | 2.22E-74  | 4.06E-70  | 0.998 | 1     |
| NNMT     | 0 | -0.6180746 | 5.92E-51  | 1.08E-46  | 0.854 | 0.981 |
| EEF1A1   | 0 | -0.6486385 | 1.41E-142 | 2.57E-138 | 1     | 1     |
| MT-ND1   | 0 | -0.6507158 | 5.10E-37  | 9.31E-33  | 0.417 | 0.738 |
| RPL4     | 0 | -0.6622202 | 3.29E-128 | 6.01E-124 | 1     | 1     |
| PRUNE2   | 0 | -0.6646353 | 1.16E-54  | 2.12E-50  | 0.22  | 0.649 |
| CITED2   | 0 | -0.6656102 | 1.11E-46  | 2.02E-42  | 0.2   | 0.587 |
| COL2A1   | 0 | -0.6723926 | 2.53E-57  | 4.61E-53  | 0.415 | 0.857 |
| CCNI     | 0 | -0.676862  | 1.34E-115 | 2.45E-111 | 0.998 | 1     |
| P4HB     | 0 | -0.6786    | 7.48E-62  | 1.36E-57  | 0.623 | 0.935 |
| RPL10A   | 0 | -0.680292  | 1.94E-132 | 3.54E-128 | 1     | 1     |
| ID3      | 0 | -0.6869741 | 8.51E-40  | 1.55E-35  | 0.323 | 0.714 |
| HIST1H1C | 0 | -0.6950066 | 2.36E-34  | 4.31E-30  | 0.258 | 0.573 |
| RHOBTB3  | 0 | -0.7049755 | 8.19E-61  | 1.49E-56  | 0.451 | 0.836 |
| VIM      | 0 | -0.7064854 | 1.02E-86  | 1.85E-82  | 1     | 1     |
| RPS8     | 0 | -0.7140221 | 4.20E-160 | 7.66E-156 | 1     | 1     |
| RPLP0    | 0 | -0.7340358 | 2.49E-152 | 4.54E-148 | 1     | 1     |
| MT-CO3   | 0 | -0.7439173 | 1.42E-31  | 2.59E-27  | 0.821 | 0.874 |
| XAGE2    | 0 | -0.7449579 | 1.69E-35  | 3.08E-31  | 0.002 | 0.25  |
| MT-CO2   | 0 | -0.7473611 | 1.09E-31  | 1.98E-27  | 0.917 | 0.917 |
| MT-ATP6  | 0 | -0.7513142 | 7.14E-37  | 1.30E-32  | 0.699 | 0.857 |
| YBX3     | 0 | -0.7591452 | 1.08E-88  | 1.97E-84  | 0.724 | 0.969 |
| SPARC    | 0 | -0.7732216 | 8.73E-72  | 1.59E-67  | 0.19  | 0.694 |
| SLC40A1  | 0 | -0.7735968 | 2.64E-64  | 4.82E-60  | 0.065 | 0.513 |
| CRTAP    | 0 | -0.7795357 | 9.97E-98  | 1.82E-93  | 0.496 | 0.931 |
| EIF3H    | 0 | -0.7918116 | 2.08E-122 | 3.79E-118 | 0.957 | 1     |
| MT-CO1   | 0 | -0.7919248 | 6.30E-31  | 1.15E-26  | 0.937 | 0.909 |
| B2M      | 0 | -0.7939931 | 2.31E-106 | 4.22E-102 | 0.995 | 1     |
| GPX3     | 0 | -0.8024191 | 8.84E-79  | 1.61E-74  | 0.912 | 0.993 |
| MT-CYB   | 0 | -0.8550674 | 2.37E-49  | 4.32E-45  | 0.527 | 0.828 |
| C2orf82  | 0 | -0.8718169 | 1.06E-75  | 1.93E-71  | 0.921 | 1     |
| MT-ND2   | 0 | -0.908054  | 9.52E-45  | 1.74E-40  | 0.502 | 0.78  |
| APOD     | 0 | -0.9240069 | 6.30E-49  | 1.15E-44  | 0.171 | 0.561 |
| NEAT1    | 0 | -0.9274664 | 1.22E-100 | 2.23E-96  | 0.987 | 0.998 |
| PAX1     | 0 | -0.9333762 | 1.03E-95  | 1.87E-91  | 0.403 | 0.898 |
| ACTG1    | 0 | -0.9344587 | 6.02E-104 | 1.10E-99  | 0.937 | 0.998 |
| CAPS     | 0 | -0.9964306 | 2.83E-79  | 5.17E-75  | 0.489 | 0.912 |

| RPS20   | 0       | -1.0098311 | 5.00E-175 | 9.11E-171 | 0.998 | 1     |
|---------|---------|------------|-----------|-----------|-------|-------|
| RPS11   | 0       | -1.0479369 | 3.53E-171 | 6.45E-167 | 0.987 | 1     |
| MT-ND3  | 0       | -1.0557432 | 1.39E-62  | 2.54E-58  | 0.489 | 0.809 |
| ZFP36L2 | 0       | -1.0654357 | 1.23E-70  | 2.24E-66  | 0.137 | 0.627 |
| CLEC3A  | 0       | -1.1588556 | 1.19E-92  | 2.18E-88  | 0.264 | 0.835 |
| ADIRF   | 0       | -1.1714212 | 8.10E-101 | 1.48E-96  | 0.3   | 0.855 |
| OGN     | 0       | -1.3303552 | 1.43E-101 | 2.60E-97  | 0.857 | 0.979 |
| SPTSSB  | 0       | -1.5514351 | 3.52E-128 | 6.42E-124 | 0.029 | 0.742 |
| FRZB    | 0       | -2.2033143 | 1.02E-126 | 1.85E-122 | 0.255 | 0.909 |
| gene    | cluster | avg_logFC  | p_val     | p_val_adj | pct.1 | pct.2 |
| SPP1    | 1       | 1.96075969 | 8.86E-108 | 1.62E-103 | 0.717 | 0.078 |
| PLA2G2A | 1       | 1.52866988 | 3.96E-70  | 7.22E-66  | 0.708 | 0.197 |
| PRG4    | 1       | 1.3933776  | 2.12E-68  | 3.87E-64  | 0.479 | 0.04  |
| COMP    | 1       | 1.3601691  | 4.12E-72  | 7.51E-68  | 0.993 | 0.802 |
| CHI3L2  | 1       | 1.29754359 | 6.40E-85  | 1.17E-80  | 0.865 | 0.407 |
| S100A2  | 1       | 1.2245374  | 7.80E-44  | 1.42E-39  | 0.603 | 0.246 |
| VEGFA   | 1       | 1.2189331  | 1.95E-78  | 3.55E-74  | 0.776 | 0.306 |
| PTGS2   | 1       | 1.15379578 | 3.02E-88  | 5.52E-84  | 0.575 | 0.045 |
| MT1G    | 1       | 1.1154134  | 2.12E-41  | 3.88E-37  | 0.977 | 0.932 |
| TGFBI   | 1       | 1.10608105 | 1.44E-70  | 2.62E-66  | 0.699 | 0.233 |
| CTSD    | 1       | 1.0688436  | 2.85E-44  | 5.20E-40  | 0.989 | 0.94  |
| MT1X    | 1       | 1.06235356 | 6.85E-56  | 1.25E-51  | 1     | 0.988 |
| MT2A    | 1       | 1.00353418 | 5.71E-46  | 1.04E-41  | 1     | 0.997 |
| PPP3CA  | 1       | 0.96623116 | 8.54E-72  | 1.56E-67  | 0.929 | 0.65  |
| IGFBP3  | 1       | 0.92866469 | 6.00E-44  | 1.09E-39  | 0.379 | 0.055 |
| CCDC85B | 1       | 0.88412121 | 4.38E-48  | 8.00E-44  | 0.9   | 0.707 |
| EPYC    | 1       | 0.87777138 | 2.35E-51  | 4.28E-47  | 0.539 | 0.131 |
| DDIT4L  | 1       | 0.85445021 | 2.55E-54  | 4.65E-50  | 0.847 | 0.504 |
| MRPS6   | 1       | 0.84212082 | 1.94E-30  | 3.53E-26  | 0.95  | 0.892 |
| SOD2    | 1       | 0.83042719 | 6.17E-43  | 1.13E-38  | 0.982 | 0.894 |
| FN1     | 1       | 0.82749888 | 7.58E-78  | 1.38E-73  | 1     | 0.995 |
| PHLDA1  | 1       | 0.82050188 | 2.60E-45  | 4.74E-41  | 0.377 | 0.048 |
| ADM     | 1       | 0.78626621 | 5.51E-28  | 1.01E-23  | 0.811 | 0.598 |
| CYTL1   | 1       | 0.77992687 | 4.18E-25  | 7.64E-21  | 0.443 | 0.166 |
| WTAP    | 1       | 0.76263308 | 7.75E-48  | 1.41E-43  | 0.808 | 0.481 |
| DDIT3   | 1       | 0.75543177 | 4.65E-37  | 8.48E-33  | 0.689 | 0.373 |
| MT1H    | 1       | 0.73369853 | 7.74E-17  | 1.41E-12  | 0.76  | 0.584 |
| SLC2A1  | 1       | 0.73257448 | 8.42E-43  | 1.54E-38  | 0.491 | 0.143 |
| CHI3L1  | 1       | 0.71095869 | 1.15E-21  | 2.09E-17  | 0.977 | 0.949 |

|           |   |            |          |          |       |       |
|-----------|---|------------|----------|----------|-------|-------|
| ERO1A     | 1 | 0.70902938 | 2.24E-40 | 4.09E-36 | 0.683 | 0.373 |
| RGS2      | 1 | 0.70224149 | 8.94E-18 | 1.63E-13 | 0.477 | 0.261 |
| SERPINE2  | 1 | 0.70058745 | 1.62E-32 | 2.95E-28 | 1     | 0.998 |
| CCDC80    | 1 | 0.69729707 | 1.55E-36 | 2.83E-32 | 0.995 | 0.972 |
| PTP4A1    | 1 | 0.67816037 | 1.62E-34 | 2.96E-30 | 0.632 | 0.35  |
| TIMP1     | 1 | 0.67559793 | 2.73E-18 | 4.98E-14 | 1     | 0.998 |
| TNFRSF12A | 1 | 0.67336263 | 2.54E-25 | 4.64E-21 | 0.395 | 0.141 |
| SLC3A2    | 1 | 0.66769403 | 1.40E-31 | 2.56E-27 | 0.548 | 0.249 |
| FOSL1     | 1 | 0.65256057 | 6.77E-42 | 1.24E-37 | 0.317 | 0.026 |
| CTHRC1    | 1 | 0.6467938  | 9.50E-56 | 1.73E-51 | 0.429 | 0.046 |
| CA9       | 1 | 0.64518678 | 1.91E-30 | 3.49E-26 | 0.58  | 0.293 |
| AEBP1     | 1 | 0.63603149 | 6.89E-41 | 1.26E-36 | 0.767 | 0.438 |
| ENO2      | 1 | 0.63505147 | 1.30E-40 | 2.37E-36 | 0.653 | 0.315 |
| NRN1      | 1 | 0.63353121 | 1.55E-21 | 2.83E-17 | 0.605 | 0.332 |
| TMEM45A   | 1 | 0.63280694 | 1.54E-37 | 2.81E-33 | 0.927 | 0.797 |
| BTG1      | 1 | 0.62532098 | 1.38E-46 | 2.51E-42 | 0.986 | 0.919 |
| CFD       | 1 | 0.62360965 | 8.81E-32 | 1.61E-27 | 0.308 | 0.049 |
| BMP2      | 1 | 0.59242567 | 6.16E-42 | 1.12E-37 | 0.333 | 0.034 |
| CD44      | 1 | 0.57556886 | 1.62E-48 | 2.95E-44 | 0.9   | 0.535 |
| MMP3      | 1 | 0.57319222 | 9.38E-18 | 1.71E-13 | 0.918 | 0.826 |
| EGLN3     | 1 | 0.57238174 | 7.16E-34 | 1.31E-29 | 0.482 | 0.164 |
| BZW1      | 1 | 0.56914875 | 1.19E-31 | 2.17E-27 | 0.655 | 0.382 |
| STK17A    | 1 | 0.56151406 | 9.76E-27 | 1.78E-22 | 0.402 | 0.135 |
| BHLHE40   | 1 | 0.560565   | 3.64E-22 | 6.65E-18 | 0.582 | 0.349 |
| PPP1CB    | 1 | 0.54377092 | 2.34E-20 | 4.28E-16 | 0.845 | 0.702 |
| HILPDA    | 1 | 0.5330127  | 2.79E-23 | 5.09E-19 | 0.555 | 0.289 |
| C4orf48   | 1 | 0.52892028 | 9.27E-40 | 1.69E-35 | 0.555 | 0.187 |
| ORM1      | 1 | 0.52590823 | 2.03E-19 | 3.71E-15 | 0.365 | 0.137 |
| IGFBP5    | 1 | 0.51981203 | 1.46E-26 | 2.66E-22 | 0.352 | 0.097 |
| ARRDC3    | 1 | 0.51530484 | 1.45E-16 | 2.64E-12 | 0.463 | 0.261 |
| IFRD1     | 1 | 0.51143925 | 4.10E-31 | 7.48E-27 | 0.71  | 0.43  |
| UPP1      | 1 | 0.50516334 | 2.54E-33 | 4.63E-29 | 0.42  | 0.12  |
| SLC25A37  | 1 | 0.50322481 | 3.61E-33 | 6.59E-29 | 0.836 | 0.578 |
| TPD52     | 1 | 0.50172587 | 2.44E-34 | 4.44E-30 | 0.817 | 0.568 |
| GBE1      | 1 | 0.49909578 | 9.30E-18 | 1.70E-13 | 0.68  | 0.518 |
| IBSP      | 1 | 0.49309012 | 7.91E-13 | 1.44E-08 | 0.139 | 0.026 |
| AK2       | 1 | 0.49230539 | 2.80E-25 | 5.10E-21 | 0.769 | 0.604 |
| FAM162A   | 1 | 0.49037068 | 6.73E-29 | 1.23E-24 | 0.947 | 0.876 |
| NOVA1     | 1 | 0.47814924 | 6.26E-14 | 1.14E-09 | 0.916 | 0.865 |



|               |   |            |          |          |       |       |
|---------------|---|------------|----------|----------|-------|-------|
| ARF6          | 1 | 0.47577645 | 1.05E-26 | 1.92E-22 | 0.623 | 0.367 |
| GAPDH         | 1 | 0.47211195 | 4.74E-13 | 8.65E-09 | 1     | 1     |
| TREM1         | 1 | 0.47105081 | 1.22E-56 | 2.22E-52 | 0.356 | 0.008 |
| NDRG1         | 1 | 0.46711678 | 5.16E-27 | 9.42E-23 | 0.616 | 0.338 |
| NT5C3A        | 1 | 0.46562543 | 1.72E-23 | 3.14E-19 | 0.413 | 0.164 |
| VAPA          | 1 | 0.45500878 | 1.23E-33 | 2.24E-29 | 0.925 | 0.854 |
| MT1F          | 1 | 0.44943567 | 5.00E-11 | 9.12E-07 | 0.957 | 0.937 |
| HLA-DRB1      | 1 | 0.44843223 | 5.78E-33 | 1.05E-28 | 0.461 | 0.152 |
| PPP1R15A      | 1 | 0.44610444 | 1.33E-30 | 2.43E-26 | 0.411 | 0.123 |
| CD55          | 1 | 0.44265096 | 2.73E-22 | 4.97E-18 | 0.648 | 0.418 |
| SPRY2         | 1 | 0.44074249 | 1.32E-32 | 2.41E-28 | 0.292 | 0.04  |
| PMP22         | 1 | 0.43949949 | 9.16E-17 | 1.67E-12 | 0.772 | 0.604 |
| PLA2G4A       | 1 | 0.43902086 | 8.85E-40 | 1.62E-35 | 0.452 | 0.112 |
| PDE4B         | 1 | 0.43804764 | 1.52E-36 | 2.77E-32 | 0.397 | 0.084 |
| EGR1          | 1 | 0.43524182 | 1.08E-15 | 1.98E-11 | 0.438 | 0.243 |
| ATP6V1G1      | 1 | 0.4301069  | 4.61E-39 | 8.42E-35 | 0.986 | 0.942 |
| RABGGTB       | 1 | 0.43004921 | 1.34E-30 | 2.45E-26 | 0.751 | 0.487 |
| STK26         | 1 | 0.41676104 | 2.76E-29 | 5.03E-25 | 0.505 | 0.198 |
| DNER          | 1 | 0.41570882 | 3.27E-21 | 5.96E-17 | 0.527 | 0.281 |
| PGK1          | 1 | 0.41151462 | 2.74E-16 | 5.00E-12 | 0.97  | 0.934 |
| DNAJB9        | 1 | 0.40650693 | 3.31E-20 | 6.05E-16 | 0.703 | 0.501 |
| ADAMTS6       | 1 | 0.40355293 | 4.46E-30 | 8.13E-26 | 0.299 | 0.052 |
| C10orf10      | 1 | 0.39948053 | 2.16E-10 | 3.94E-06 | 0.584 | 0.438 |
| RNF145        | 1 | 0.39159037 | 1.01E-21 | 1.84E-17 | 0.484 | 0.229 |
| WWP2          | 1 | 0.38971766 | 9.61E-18 | 1.75E-13 | 0.82  | 0.677 |
| INSIG2        | 1 | 0.38641189 | 7.46E-13 | 1.36E-08 | 0.603 | 0.464 |
| GPX1          | 1 | 0.3818058  | 2.03E-23 | 3.70E-19 | 0.897 | 0.759 |
| NAMPT         | 1 | 0.38094516 | 1.35E-26 | 2.47E-22 | 0.639 | 0.336 |
| RP11-125O18.1 | 1 | 0.38054237 | 2.97E-32 | 5.41E-28 | 0.352 | 0.072 |
| ARPP19        | 1 | 0.37979351 | 1.55E-18 | 2.83E-14 | 0.626 | 0.442 |
| CTSL          | 1 | 0.37783465 | 4.78E-09 | 8.72E-05 | 0.507 | 0.372 |
| WDR45B        | 1 | 0.3766582  | 5.38E-20 | 9.82E-16 | 0.459 | 0.227 |
| ARF4          | 1 | 0.36799722 | 1.66E-18 | 3.02E-14 | 0.744 | 0.588 |
| RAB1A         | 1 | 0.3651727  | 5.37E-20 | 9.80E-16 | 0.804 | 0.67  |
| BAALC         | 1 | 0.36477552 | 6.50E-14 | 1.19E-09 | 0.507 | 0.32  |
| CRLF1         | 1 | 0.35879442 | 5.10E-23 | 9.30E-19 | 0.425 | 0.166 |
| EMP3          | 1 | 0.35647066 | 1.12E-19 | 2.05E-15 | 0.918 | 0.854 |
| XBP1          | 1 | 0.35641304 | 1.45E-14 | 2.65E-10 | 0.687 | 0.519 |
| SLC39A8       | 1 | 0.3559052  | 8.28E-21 | 1.51E-16 | 0.514 | 0.266 |

|          |   |            |          |            |       |       |
|----------|---|------------|----------|------------|-------|-------|
| ERRFI1   | 1 | 0.35029132 | 1.39E-11 | 2.53E-07   | 0.358 | 0.189 |
| CXCL14   | 1 | 0.34651374 | 1.92E-13 | 3.51E-09   | 0.103 | 0.008 |
| PAM      | 1 | 0.34150175 | 1.18E-18 | 2.16E-14   | 0.806 | 0.659 |
| GOLT1B   | 1 | 0.34006106 | 8.79E-22 | 1.60E-17   | 0.47  | 0.214 |
| RNMT     | 1 | 0.33945092 | 4.37E-14 | 7.97E-10   | 0.495 | 0.306 |
| WDR33    | 1 | 0.33688833 | 1.74E-14 | 3.17E-10   | 0.548 | 0.359 |
| CLK1     | 1 | 0.33675497 | 2.25E-19 | 4.10E-15   | 0.667 | 0.43  |
| COX17    | 1 | 0.33372785 | 3.71E-20 | 6.77E-16   | 0.84  | 0.648 |
| BNIP3    | 1 | 0.33265295 | 2.43E-16 | 4.43E-12   | 0.998 | 0.998 |
| C11orf96 | 1 | 0.3322331  | 7.96E-21 | 1.45E-16   | 0.235 | 0.048 |
| PLAUR    | 1 | 0.33192183 | 2.14E-18 | 3.91E-14   | 0.4   | 0.174 |
| PDPN     | 1 | 0.32948448 | 8.75E-08 | 0.00159578 | 0.664 | 0.565 |
| CDK5RAP2 | 1 | 0.32942091 | 4.77E-08 | 0.0008706  | 0.263 | 0.141 |
| MTHFD2   | 1 | 0.32928002 | 9.27E-16 | 1.69E-11   | 0.671 | 0.462 |
| ISG20    | 1 | 0.3289252  | 4.78E-14 | 8.72E-10   | 0.507 | 0.312 |
| SAT1     | 1 | 0.32737713 | 9.35E-20 | 1.71E-15   | 0.991 | 0.962 |
| SMOC2    | 1 | 0.32623408 | 3.36E-22 | 6.13E-18   | 0.32  | 0.089 |
| CRTAC1   | 1 | 0.32390772 | 3.82E-17 | 6.98E-13   | 0.402 | 0.183 |
| SLC5A3   | 1 | 0.32155147 | 3.68E-08 | 0.00067223 | 0.534 | 0.409 |
| PPFIBP1  | 1 | 0.31895226 | 1.21E-11 | 2.20E-07   | 0.5   | 0.339 |
| PTGES3   | 1 | 0.31756441 | 1.81E-21 | 3.30E-17   | 0.941 | 0.911 |
| HIF1A    | 1 | 0.31756026 | 5.69E-15 | 1.04E-10   | 0.945 | 0.879 |
| C11orf31 | 1 | 0.31735002 | 4.08E-18 | 7.45E-14   | 0.795 | 0.641 |
| MED21    | 1 | 0.31731697 | 2.38E-16 | 4.34E-12   | 0.541 | 0.33  |
| AVPI1    | 1 | 0.31676166 | 1.16E-13 | 2.12E-09   | 0.397 | 0.215 |
| CCNG2    | 1 | 0.31185241 | 5.05E-10 | 9.21E-06   | 0.491 | 0.344 |
| CLU      | 1 | 0.3108765  | 2.27E-12 | 4.15E-08   | 1     | 1     |
| TMEM38B  | 1 | 0.31003981 | 2.35E-14 | 4.29E-10   | 0.543 | 0.355 |
| NPR3     | 1 | 0.3099752  | 3.72E-33 | 6.78E-29   | 0.212 | 0.003 |
| CLIC4    | 1 | 0.30974449 | 7.33E-15 | 1.34E-10   | 0.568 | 0.364 |
| SLC25A36 | 1 | 0.30927935 | 1.11E-17 | 2.03E-13   | 0.635 | 0.401 |
| DDX41    | 1 | 0.30878783 | 5.36E-17 | 9.78E-13   | 0.313 | 0.118 |
| NTMT1    | 1 | 0.30707498 | 1.59E-17 | 2.91E-13   | 0.489 | 0.264 |
| DDIT4    | 1 | 0.30501119 | 9.62E-07 | 0.01756174 | 0.534 | 0.416 |
| COL10A1  | 1 | 0.30484128 | 1.28E-13 | 2.33E-09   | 0.112 | 0.011 |
| CTNNB1   | 1 | 0.30211627 | 2.84E-08 | 0.00051739 | 0.447 | 0.303 |
| CD68     | 1 | 0.30195095 | 3.38E-14 | 6.16E-10   | 0.637 | 0.425 |
| SRGN     | 1 | 0.30139199 | 2.27E-12 | 4.15E-08   | 0.484 | 0.289 |
| ZNF385D  | 1 | 0.29975831 | 5.33E-13 | 9.72E-09   | 0.658 | 0.476 |

|           |   |            |          |            |       |       |
|-----------|---|------------|----------|------------|-------|-------|
| SNRNP27   | 1 | 0.29812585 | 5.63E-18 | 1.03E-13   | 0.518 | 0.289 |
| TSHZ2     | 1 | 0.29557676 | 5.95E-30 | 1.08E-25   | 0.237 | 0.02  |
| EIF4EBP1  | 1 | 0.29165889 | 3.59E-10 | 6.55E-06   | 0.546 | 0.387 |
| SGIP1     | 1 | 0.28824925 | 5.08E-25 | 9.28E-21   | 0.205 | 0.02  |
| MIF       | 1 | 0.28659628 | 5.45E-26 | 9.95E-22   | 1     | 1     |
| SEP7      | 1 | 0.28630953 | 5.51E-12 | 1.00E-07   | 0.664 | 0.515 |
| NOL3      | 1 | 0.28524515 | 7.58E-12 | 1.38E-07   | 0.53  | 0.346 |
| EPS8      | 1 | 0.28430481 | 3.57E-15 | 6.51E-11   | 0.352 | 0.157 |
| CLDND1    | 1 | 0.28361757 | 1.97E-14 | 3.59E-10   | 0.457 | 0.261 |
| ATP6V0E1  | 1 | 0.28336601 | 2.16E-16 | 3.94E-12   | 0.911 | 0.857 |
| C4orf3    | 1 | 0.2823558  | 8.36E-21 | 1.53E-16   | 0.998 | 0.975 |
| PCSK1N    | 1 | 0.27933517 | 1.64E-09 | 2.99E-05   | 0.365 | 0.203 |
| WSB1      | 1 | 0.2785077  | 3.78E-15 | 6.89E-11   | 0.87  | 0.757 |
| TNFRSF11B | 1 | 0.27577172 | 1.01E-06 | 0.018516   | 0.669 | 0.565 |
| SAR1A     | 1 | 0.2738137  | 6.11E-14 | 1.11E-09   | 0.605 | 0.419 |
| ANGPTL4   | 1 | 0.26915731 | 1.39E-12 | 2.53E-08   | 0.306 | 0.134 |
| RPS27L    | 1 | 0.26696987 | 4.52E-13 | 8.25E-09   | 0.968 | 0.932 |
| SLC20A1   | 1 | 0.26456096 | 1.59E-14 | 2.90E-10   | 0.249 | 0.084 |
| RAB7A     | 1 | 0.2626497  | 6.62E-10 | 1.21E-05   | 0.683 | 0.594 |
| GPRC5A    | 1 | 0.2605895  | 1.89E-15 | 3.44E-11   | 0.272 | 0.095 |
| RNF126    | 1 | 0.25962078 | 1.80E-13 | 3.29E-09   | 0.352 | 0.169 |
| PID1      | 1 | 0.25886907 | 5.93E-09 | 0.00010822 | 0.546 | 0.404 |
| EIF4A2    | 1 | 0.25840376 | 4.79E-15 | 8.75E-11   | 0.998 | 0.994 |
| TRMT112   | 1 | 0.25830499 | 4.46E-18 | 8.14E-14   | 0.943 | 0.883 |
| MEF2A     | 1 | 0.25735993 | 8.19E-13 | 1.49E-08   | 0.493 | 0.301 |
| ANKRD37   | 1 | 0.25735392 | 1.50E-07 | 0.00274357 | 0.374 | 0.252 |
| CLDN12    | 1 | 0.25695815 | 9.29E-16 | 1.69E-11   | 0.422 | 0.206 |
| RTN4      | 1 | 0.25676992 | 1.35E-11 | 2.47E-07   | 0.694 | 0.536 |
| C7orf50   | 1 | 0.25644566 | 4.72E-09 | 8.61E-05   | 0.632 | 0.512 |
| EVI2A     | 1 | 0.25610676 | 2.12E-19 | 3.88E-15   | 0.276 | 0.077 |
| SMOX      | 1 | 0.25559085 | 2.00E-07 | 0.00364093 | 0.299 | 0.178 |
| RORA      | 1 | 0.25426141 | 3.44E-14 | 6.27E-10   | 0.463 | 0.253 |
| LTBP1     | 1 | 0.25204112 | 1.85E-26 | 3.38E-22   | 0.235 | 0.029 |
| GLRX      | 1 | 0.25155189 | 3.48E-08 | 0.00063427 | 0.361 | 0.221 |
| FTL       | 1 | -0.2500986 | 2.55E-29 | 4.65E-25   | 1     | 1     |
| MDFI      | 1 | -0.2506436 | 1.16E-11 | 2.12E-07   | 0.491 | 0.691 |
| HADHA     | 1 | -0.2509986 | 3.41E-13 | 6.23E-09   | 0.356 | 0.555 |
| PTGFR     | 1 | -0.2520806 | 9.25E-15 | 1.69E-10   | 0.112 | 0.306 |
| PTPRD-AS1 | 1 | -0.2526743 | 8.70E-14 | 1.59E-09   | 0.269 | 0.481 |

|            |   |            |          |            |       |       |
|------------|---|------------|----------|------------|-------|-------|
| GABPB1-AS1 | 1 | -0.2540484 | 2.39E-15 | 4.35E-11   | 0.167 | 0.381 |
| SLC25A5    | 1 | -0.2544972 | 9.28E-13 | 1.69E-08   | 0.368 | 0.556 |
| EIF2S3     | 1 | -0.2552101 | 1.89E-13 | 3.45E-09   | 0.507 | 0.684 |
| SNHG18     | 1 | -0.2555748 | 4.06E-14 | 7.40E-10   | 0.205 | 0.413 |
| IFI27L2    | 1 | -0.2557548 | 4.56E-14 | 8.31E-10   | 0.801 | 0.916 |
| MYL12B     | 1 | -0.2559523 | 2.72E-13 | 4.96E-09   | 0.475 | 0.662 |
| MZT2B      | 1 | -0.256057  | 3.29E-21 | 6.01E-17   | 0.945 | 0.98  |
| MSMP       | 1 | -0.2608719 | 7.23E-07 | 0.01318821 | 0.123 | 0.246 |
| KTN1       | 1 | -0.2609597 | 6.10E-13 | 1.11E-08   | 0.562 | 0.711 |
| RPS4Y1     | 1 | -0.2609727 | 1.03E-25 | 1.88E-21   | 0.977 | 0.997 |
| CCNG1      | 1 | -0.2613498 | 3.28E-13 | 5.99E-09   | 0.384 | 0.582 |
| DPYSL3     | 1 | -0.2614197 | 1.20E-15 | 2.20E-11   | 0.155 | 0.372 |
| BEX2       | 1 | -0.2623703 | 2.20E-13 | 4.01E-09   | 0.247 | 0.453 |
| FAU        | 1 | -0.2629002 | 1.12E-44 | 2.04E-40   | 1     | 1     |
| PRKCSH     | 1 | -0.2633338 | 3.95E-11 | 7.21E-07   | 0.349 | 0.521 |
| QARS       | 1 | -0.2634873 | 1.41E-15 | 2.57E-11   | 0.171 | 0.382 |
| RPL6       | 1 | -0.2637262 | 8.57E-37 | 1.56E-32   | 1     | 1     |
| AC005152.3 | 1 | -0.2637956 | 1.62E-15 | 2.96E-11   | 0.1   | 0.301 |
| RPL28      | 1 | -0.2642941 | 1.27E-42 | 2.32E-38   | 1     | 1     |
| RPL32      | 1 | -0.2643111 | 8.98E-50 | 1.64E-45   | 1     | 1     |
| RPL5       | 1 | -0.2654257 | 3.76E-35 | 6.85E-31   | 1     | 1     |
| PDE4DIP    | 1 | -0.265534  | 4.04E-13 | 7.37E-09   | 0.393 | 0.581 |
| PGAM1      | 1 | -0.26584   | 2.87E-15 | 5.24E-11   | 0.783 | 0.905 |
| HMGB1      | 1 | -0.2668041 | 2.92E-13 | 5.32E-09   | 0.642 | 0.817 |
| ATP5A1     | 1 | -0.2673171 | 4.82E-13 | 8.80E-09   | 0.5   | 0.671 |
| HERPUD1    | 1 | -0.2695916 | 2.77E-12 | 5.06E-08   | 0.425 | 0.607 |
| RPL24      | 1 | -0.2715839 | 7.44E-47 | 1.36E-42   | 1     | 1     |
| MYLK       | 1 | -0.2721412 | 1.55E-11 | 2.84E-07   | 0.194 | 0.373 |
| ARL2BP     | 1 | -0.272246  | 2.30E-12 | 4.19E-08   | 0.521 | 0.651 |
| HOXB8      | 1 | -0.2726575 | 5.13E-20 | 9.36E-16   | 0.096 | 0.33  |
| INSIG1     | 1 | -0.2726904 | 4.74E-09 | 8.66E-05   | 0.345 | 0.493 |
| SLC29A1    | 1 | -0.2727173 | 6.21E-15 | 1.13E-10   | 0.256 | 0.472 |
| COL6A1     | 1 | -0.272858  | 2.02E-14 | 3.69E-10   | 0.413 | 0.621 |
| RARRES3    | 1 | -0.2729094 | 1.28E-18 | 2.33E-14   | 0.096 | 0.321 |
| UQCRHL     | 1 | -0.2733068 | 4.15E-15 | 7.56E-11   | 0.331 | 0.544 |
| TIMP2      | 1 | -0.2734909 | 9.83E-14 | 1.79E-09   | 0.539 | 0.719 |
| RPS4X      | 1 | -0.2743365 | 9.26E-52 | 1.69E-47   | 1     | 1     |
| BRK1       | 1 | -0.275159  | 7.87E-21 | 1.44E-16   | 0.852 | 0.946 |
| SNRPE      | 1 | -0.2764654 | 1.59E-13 | 2.89E-09   | 0.584 | 0.734 |

|             |   |            |          |            |       |       |
|-------------|---|------------|----------|------------|-------|-------|
| HIST1H2AC   | 1 | -0.2766537 | 2.19E-16 | 3.99E-12   | 0.116 | 0.33  |
| TSPO        | 1 | -0.2769122 | 5.32E-19 | 9.71E-15   | 0.822 | 0.934 |
| RPA3        | 1 | -0.2778217 | 5.33E-16 | 9.72E-12   | 0.436 | 0.641 |
| RPL36AL     | 1 | -0.2786368 | 1.09E-26 | 1.99E-22   | 0.995 | 1     |
| FBXO2       | 1 | -0.2786668 | 2.23E-16 | 4.07E-12   | 0.858 | 0.949 |
| RPL26       | 1 | -0.2793231 | 1.42E-45 | 2.58E-41   | 1     | 1     |
| CAV1        | 1 | -0.2817383 | 5.84E-18 | 1.07E-13   | 0.568 | 0.82  |
| LITAF       | 1 | -0.2819207 | 9.87E-14 | 1.80E-09   | 0.459 | 0.639 |
| EIF3E       | 1 | -0.2822142 | 4.06E-23 | 7.40E-19   | 0.995 | 1     |
| IGBP1       | 1 | -0.2837925 | 1.72E-13 | 3.14E-09   | 0.532 | 0.693 |
| C19orf43    | 1 | -0.2855386 | 3.08E-16 | 5.62E-12   | 0.772 | 0.899 |
| TRPS1       | 1 | -0.2857706 | 9.75E-13 | 1.78E-08   | 0.438 | 0.625 |
| PRCP        | 1 | -0.2865034 | 5.45E-17 | 9.95E-13   | 0.196 | 0.424 |
| EIF3M       | 1 | -0.2865603 | 1.11E-13 | 2.02E-09   | 0.495 | 0.665 |
| HMG2        | 1 | -0.2865941 | 2.93E-21 | 5.35E-17   | 0.893 | 0.972 |
| KHDRBS3     | 1 | -0.2866465 | 1.89E-23 | 3.45E-19   | 0.011 | 0.224 |
| MTDH        | 1 | -0.2870947 | 4.85E-15 | 8.85E-11   | 0.571 | 0.745 |
| NCOR1       | 1 | -0.2871382 | 3.38E-18 | 6.18E-14   | 0.162 | 0.395 |
| SSR4        | 1 | -0.2875442 | 1.12E-18 | 2.04E-14   | 0.973 | 0.992 |
| SMIM19      | 1 | -0.2879314 | 1.14E-15 | 2.08E-11   | 0.336 | 0.544 |
| PPT1        | 1 | -0.2888066 | 4.41E-14 | 8.05E-10   | 0.416 | 0.604 |
| CYBRD1      | 1 | -0.2888883 | 8.03E-16 | 1.47E-11   | 0.459 | 0.671 |
| CA11        | 1 | -0.2900238 | 2.40E-20 | 4.37E-16   | 0.158 | 0.413 |
| SERTAD4-AS1 | 1 | -0.2908141 | 4.00E-18 | 7.30E-14   | 0.123 | 0.349 |
| CTSK        | 1 | -0.2934951 | 1.01E-14 | 1.84E-10   | 0.288 | 0.493 |
| FBL         | 1 | -0.2935572 | 3.91E-16 | 7.14E-12   | 0.459 | 0.667 |
| NGFRAP1     | 1 | -0.293803  | 2.81E-21 | 5.12E-17   | 0.909 | 0.983 |
| RPL15       | 1 | -0.294526  | 1.34E-66 | 2.44E-62   | 1     | 1     |
| ARPC1A      | 1 | -0.2947709 | 1.39E-16 | 2.53E-12   | 0.425 | 0.651 |
| SP5         | 1 | -0.2957142 | 9.95E-23 | 1.82E-18   | 0     | 0.195 |
| KDEL2       | 1 | -0.2983727 | 2.39E-19 | 4.36E-15   | 0.769 | 0.939 |
| NACA        | 1 | -0.2986633 | 3.93E-44 | 7.18E-40   | 1     | 1     |
| RPL7A       | 1 | -0.2990311 | 6.92E-51 | 1.26E-46   | 1     | 1     |
| LPP         | 1 | -0.2996654 | 1.11E-08 | 0.00020325 | 0.381 | 0.525 |
| COX7C       | 1 | -0.3005037 | 5.13E-37 | 9.36E-33   | 1     | 1     |
| RPS14       | 1 | -0.3026946 | 1.90E-68 | 3.46E-64   | 1     | 1     |
| EIF3F       | 1 | -0.3028063 | 6.34E-20 | 1.16E-15   | 0.747 | 0.892 |
| LTA4H       | 1 | -0.305502  | 1.33E-15 | 2.42E-11   | 0.409 | 0.607 |
| ITM2C       | 1 | -0.3074731 | 3.35E-15 | 6.12E-11   | 0.694 | 0.853 |

|              |   |            |          |          |       |       |
|--------------|---|------------|----------|----------|-------|-------|
| ATP5D        | 1 | -0.3084345 | 1.99E-24 | 3.63E-20 | 0.826 | 0.955 |
| MIA          | 1 | -0.3084484 | 6.68E-18 | 1.22E-13 | 0.998 | 0.997 |
| ST13         | 1 | -0.3092858 | 4.10E-25 | 7.48E-21 | 0.927 | 0.992 |
| CCDC8        | 1 | -0.3102243 | 6.01E-21 | 1.10E-16 | 0.098 | 0.339 |
| GNB2L1       | 1 | -0.3105073 | 9.47E-43 | 1.73E-38 | 0.998 | 1     |
| PPIC         | 1 | -0.3122461 | 1.25E-11 | 2.28E-07 | 0.45  | 0.622 |
| PEBP1        | 1 | -0.3124466 | 4.47E-24 | 8.16E-20 | 0.808 | 0.975 |
| RPS28        | 1 | -0.3125015 | 1.01E-69 | 1.84E-65 | 1     | 1     |
| GLTSCR2      | 1 | -0.3158579 | 1.25E-22 | 2.29E-18 | 0.886 | 0.965 |
| OAF          | 1 | -0.3161621 | 3.58E-18 | 6.53E-14 | 0.155 | 0.384 |
| PLP2         | 1 | -0.3165639 | 4.50E-20 | 8.22E-16 | 0.644 | 0.842 |
| RPS19        | 1 | -0.3171075 | 2.03E-60 | 3.71E-56 | 1     | 1     |
| NUCB2        | 1 | -0.3173223 | 7.80E-12 | 1.42E-07 | 0.516 | 0.644 |
| HSP90AB1     | 1 | -0.3173721 | 9.27E-20 | 1.69E-15 | 0.954 | 0.994 |
| C12orf57     | 1 | -0.3175389 | 2.05E-26 | 3.74E-22 | 0.952 | 0.988 |
| DBP          | 1 | -0.3178758 | 1.32E-14 | 2.41E-10 | 0.267 | 0.478 |
| SNAI2        | 1 | -0.3185702 | 2.83E-14 | 5.17E-10 | 0.409 | 0.634 |
| RPS15A       | 1 | -0.3188916 | 3.93E-59 | 7.16E-55 | 1     | 1     |
| MT-ND5       | 1 | -0.3191021 | 4.48E-10 | 8.18E-06 | 0.587 | 0.697 |
| PLAC9        | 1 | -0.3193139 | 3.19E-15 | 5.82E-11 | 0.886 | 0.983 |
| PLXDC2       | 1 | -0.3201463 | 6.57E-17 | 1.20E-12 | 0.555 | 0.747 |
| NINJ1        | 1 | -0.3205262 | 1.62E-16 | 2.95E-12 | 0.511 | 0.716 |
| COL6A2       | 1 | -0.3209212 | 1.62E-13 | 2.96E-09 | 0.632 | 0.808 |
| ILF3-AS1     | 1 | -0.3215491 | 5.42E-20 | 9.89E-16 | 0.265 | 0.519 |
| NMRK1        | 1 | -0.3248303 | 1.74E-19 | 3.18E-15 | 0.256 | 0.499 |
| LRRC2        | 1 | -0.3256216 | 3.27E-18 | 5.98E-14 | 0.148 | 0.378 |
| CXXC5        | 1 | -0.3263981 | 1.94E-18 | 3.54E-14 | 0.244 | 0.482 |
| RPS25        | 1 | -0.3276736 | 6.00E-64 | 1.09E-59 | 1     | 1     |
| C2orf82      | 1 | -0.3282748 | 2.22E-16 | 4.05E-12 | 0.984 | 1     |
| RPS12        | 1 | -0.3289567 | 4.20E-58 | 7.67E-54 | 1     | 1     |
| ZIC1         | 1 | -0.3295898 | 4.12E-16 | 7.51E-12 | 0.199 | 0.424 |
| RP11-71N10.1 | 1 | -0.3299173 | 3.78E-26 | 6.89E-22 | 0.071 | 0.346 |
| DDR2         | 1 | -0.3322922 | 2.01E-14 | 3.66E-10 | 0.559 | 0.711 |
| ZNF90        | 1 | -0.3323463 | 6.61E-22 | 1.21E-17 | 0.406 | 0.661 |
| ZFAS1        | 1 | -0.3324435 | 2.91E-26 | 5.32E-22 | 0.982 | 0.998 |
| ID2          | 1 | -0.3343434 | 4.52E-10 | 8.25E-06 | 0.42  | 0.594 |
| AP2M1        | 1 | -0.3350441 | 3.41E-18 | 6.22E-14 | 0.466 | 0.662 |
| RPS6         | 1 | -0.3368482 | 1.66E-76 | 3.04E-72 | 1     | 1     |
| CRIP2        | 1 | -0.3375428 | 1.47E-16 | 2.69E-12 | 0.288 | 0.496 |

|            |   |            |          |          |       |       |
|------------|---|------------|----------|----------|-------|-------|
| CYSTM1     | 1 | -0.3384014 | 1.61E-20 | 2.94E-16 | 0.418 | 0.67  |
| RPS24      | 1 | -0.3402734 | 1.40E-51 | 2.55E-47 | 1     | 1     |
| NDUFA11    | 1 | -0.3406391 | 3.02E-27 | 5.52E-23 | 0.836 | 0.962 |
| RPL27A     | 1 | -0.3424492 | 9.68E-64 | 1.77E-59 | 1     | 1     |
| AC003090.1 | 1 | -0.3425446 | 3.93E-25 | 7.17E-21 | 0.11  | 0.389 |
| SPTLC3     | 1 | -0.3432543 | 2.81E-14 | 5.14E-10 | 0.164 | 0.369 |
| AFF3       | 1 | -0.3441417 | 9.63E-31 | 1.76E-26 | 0.073 | 0.382 |
| MALAT1     | 1 | -0.3441891 | 2.83E-22 | 5.16E-18 | 1     | 1     |
| RPS9       | 1 | -0.3455566 | 2.18E-70 | 3.97E-66 | 1     | 1     |
| PNISR      | 1 | -0.3459756 | 5.26E-22 | 9.60E-18 | 0.644 | 0.843 |
| HOXB6      | 1 | -0.3463492 | 1.65E-21 | 3.02E-17 | 0.199 | 0.461 |
| RGS10      | 1 | -0.3478088 | 3.52E-22 | 6.42E-18 | 0.347 | 0.616 |
| ERGIC3     | 1 | -0.3492922 | 4.69E-26 | 8.56E-22 | 0.815 | 0.945 |
| ID3        | 1 | -0.3496134 | 2.05E-15 | 3.74E-11 | 0.422 | 0.687 |
| PSMA7      | 1 | -0.3512942 | 3.26E-25 | 5.94E-21 | 0.785 | 0.942 |
| EIF3K      | 1 | -0.3519011 | 4.97E-28 | 9.08E-24 | 0.774 | 0.919 |
| COL9A3     | 1 | -0.3545085 | 3.61E-15 | 6.58E-11 | 0.724 | 0.88  |
| PLA2G16    | 1 | -0.354821  | 7.59E-20 | 1.39E-15 | 0.301 | 0.551 |
| RPS3       | 1 | -0.35638   | 3.18E-74 | 5.80E-70 | 1     | 1     |
| RPS21      | 1 | -0.3570557 | 2.70E-56 | 4.93E-52 | 1     | 1     |
| SPINT2     | 1 | -0.3574004 | 1.84E-16 | 3.36E-12 | 0.4   | 0.613 |
| ATP5G2     | 1 | -0.3584232 | 2.02E-40 | 3.68E-36 | 0.998 | 1     |
| ITM2A      | 1 | -0.360001  | 3.94E-19 | 7.20E-15 | 0.621 | 0.833 |
| MPP6       | 1 | -0.3661009 | 1.84E-26 | 3.36E-22 | 0.185 | 0.485 |
| NPM1       | 1 | -0.3662256 | 4.38E-35 | 7.99E-31 | 1     | 1     |
| TXNIP      | 1 | -0.3664141 | 1.06E-28 | 1.93E-24 | 0.068 | 0.359 |
| ATP5L      | 1 | -0.3664574 | 7.67E-33 | 1.40E-28 | 0.904 | 0.974 |
| GYPC       | 1 | -0.3684788 | 6.92E-22 | 1.26E-17 | 0.306 | 0.576 |
| RPL35      | 1 | -0.3703837 | 5.69E-72 | 1.04E-67 | 1     | 1     |
| RPL3       | 1 | -0.3704113 | 1.20E-71 | 2.19E-67 | 1     | 1     |
| COMMD6     | 1 | -0.370414  | 8.43E-46 | 1.54E-41 | 0.982 | 0.998 |
| SLC25A3    | 1 | -0.3705866 | 8.54E-32 | 1.56E-27 | 0.838 | 0.96  |
| RPL37A     | 1 | -0.371289  | 8.93E-83 | 1.63E-78 | 1     | 1     |
| EID1       | 1 | -0.3715217 | 1.70E-36 | 3.10E-32 | 0.92  | 0.989 |
| PLPP1      | 1 | -0.3732572 | 1.09E-18 | 1.99E-14 | 0.178 | 0.415 |
| PRUNE2     | 1 | -0.3735036 | 7.62E-19 | 1.39E-14 | 0.231 | 0.482 |
| EIF3D      | 1 | -0.3736658 | 1.22E-23 | 2.22E-19 | 0.646 | 0.833 |
| RPL22      | 1 | -0.3746473 | 4.37E-63 | 7.97E-59 | 1     | 1     |
| RABAC1     | 1 | -0.3754443 | 1.33E-26 | 2.43E-22 | 0.756 | 0.912 |

|         |   |            |           |          |       |       |
|---------|---|------------|-----------|----------|-------|-------|
| CP      | 1 | -0.3754653 | 4.44E-28  | 8.10E-24 | 0.721 | 0.955 |
| OXA1L   | 1 | -0.3768992 | 1.52E-24  | 2.77E-20 | 0.427 | 0.676 |
| RPL11   | 1 | -0.3786444 | 4.93E-87  | 9.00E-83 | 1     | 1     |
| RPL13   | 1 | -0.3789087 | 9.87E-91  | 1.80E-86 | 1     | 1     |
| LDHB    | 1 | -0.3790945 | 2.19E-27  | 4.00E-23 | 0.737 | 0.906 |
| PPIA    | 1 | -0.3829558 | 1.90E-36  | 3.48E-32 | 0.92  | 0.991 |
| NKX3-2  | 1 | -0.383692  | 5.45E-23  | 9.94E-19 | 0.073 | 0.321 |
| MEG3    | 1 | -0.3866219 | 3.48E-19  | 6.35E-15 | 0.196 | 0.441 |
| RPS27   | 1 | -0.3886086 | 6.40E-85  | 1.17E-80 | 1     | 1     |
| FHL1    | 1 | -0.3910261 | 3.46E-17  | 6.31E-13 | 0.336 | 0.544 |
| RPL39   | 1 | -0.3917889 | 6.67E-69  | 1.22E-64 | 1     | 1     |
| ATP5O   | 1 | -0.3919124 | 8.62E-31  | 1.57E-26 | 0.705 | 0.892 |
| RPL27   | 1 | -0.3934147 | 6.38E-57  | 1.16E-52 | 0.998 | 1     |
| RPS7    | 1 | -0.3977647 | 9.69E-73  | 1.77E-68 | 1     | 1     |
| RPL19   | 1 | -0.3983751 | 8.45E-96  | 1.54E-91 | 1     | 1     |
| HLA-A   | 1 | -0.3987521 | 4.24E-26  | 7.74E-22 | 0.918 | 0.989 |
| TUBB2B  | 1 | -0.4027244 | 1.81E-16  | 3.31E-12 | 0.418 | 0.61  |
| HS3ST1  | 1 | -0.402963  | 3.61E-28  | 6.59E-24 | 0.068 | 0.352 |
| RPS23   | 1 | -0.4032725 | 1.51E-87  | 2.76E-83 | 1     | 1     |
| RPL18A  | 1 | -0.4037754 | 3.01E-90  | 5.48E-86 | 1     | 1     |
| NFIA    | 1 | -0.4045911 | 2.22E-26  | 4.06E-22 | 0.272 | 0.565 |
| RPL35A  | 1 | -0.406725  | 1.71E-82  | 3.12E-78 | 1     | 1     |
| ZBTB20  | 1 | -0.4098291 | 1.94E-28  | 3.53E-24 | 0.292 | 0.601 |
| TTC3    | 1 | -0.4113188 | 1.04E-29  | 1.90E-25 | 0.671 | 0.882 |
| RPSA    | 1 | -0.4132118 | 2.56E-57  | 4.68E-53 | 1     | 1     |
| RPL21   | 1 | -0.415225  | 2.84E-102 | 5.18E-98 | 1     | 1     |
| RPLP1   | 1 | -0.4154731 | 2.70E-95  | 4.92E-91 | 1     | 1     |
| RPS5    | 1 | -0.415819  | 1.20E-83  | 2.19E-79 | 1     | 1     |
| YBX1    | 1 | -0.4166191 | 3.79E-48  | 6.92E-44 | 0.966 | 0.997 |
| UBA52   | 1 | -0.4178585 | 1.54E-85  | 2.81E-81 | 1     | 1     |
| MYL6    | 1 | -0.4180643 | 3.29E-35  | 6.00E-31 | 0.884 | 0.971 |
| BTF3    | 1 | -0.4196651 | 3.57E-54  | 6.52E-50 | 0.989 | 1     |
| RPL10   | 1 | -0.4213924 | 2.46E-98  | 4.48E-94 | 1     | 1     |
| TOMM7   | 1 | -0.4215192 | 1.00E-81  | 1.83E-77 | 1     | 1     |
| RPS2    | 1 | -0.4223925 | 4.34E-97  | 7.92E-93 | 1     | 1     |
| NNMT    | 1 | -0.4253348 | 4.23E-25  | 7.71E-21 | 0.877 | 0.974 |
| HNRNPA1 | 1 | -0.4258966 | 1.29E-47  | 2.36E-43 | 0.986 | 1     |
| PTMS    | 1 | -0.4261006 | 9.97E-28  | 1.82E-23 | 0.568 | 0.826 |
| LECT1   | 1 | -0.4298508 | 6.33E-26  | 1.15E-21 | 0.95  | 0.988 |



|          |   |            |           |           |       |       |
|----------|---|------------|-----------|-----------|-------|-------|
| RPL29    | 1 | -0.4319082 | 5.89E-85  | 1.07E-80  | 1     | 1     |
| EIF2A    | 1 | -0.4351889 | 8.23E-33  | 1.50E-28  | 0.628 | 0.863 |
| RPL9     | 1 | -0.4357456 | 1.79E-94  | 3.27E-90  | 1     | 1     |
| HINT1    | 1 | -0.4358368 | 8.41E-49  | 1.53E-44  | 0.963 | 0.994 |
| PDIA6    | 1 | -0.4367973 | 3.27E-27  | 5.97E-23  | 0.726 | 0.9   |
| RPS18    | 1 | -0.4368328 | 4.09E-97  | 7.46E-93  | 1     | 1     |
| HDLBP    | 1 | -0.4383966 | 5.50E-29  | 1.00E-24  | 0.395 | 0.684 |
| RPL8     | 1 | -0.4394533 | 1.41E-98  | 2.57E-94  | 1     | 1     |
| RPL14    | 1 | -0.4408129 | 1.34E-86  | 2.44E-82  | 1     | 1     |
| RPL31    | 1 | -0.4433892 | 1.21E-86  | 2.21E-82  | 1     | 1     |
| ATRNL1   | 1 | -0.4447169 | 6.88E-33  | 1.25E-28  | 0.158 | 0.499 |
| GAS6     | 1 | -0.44537   | 4.45E-27  | 8.12E-23  | 0.441 | 0.699 |
| CHRD2    | 1 | -0.4458083 | 2.46E-19  | 4.49E-15  | 0.144 | 0.389 |
| NAP1L1   | 1 | -0.4504471 | 1.96E-47  | 3.57E-43  | 0.922 | 0.989 |
| UQCRH    | 1 | -0.45092   | 3.70E-55  | 6.76E-51  | 0.895 | 0.992 |
| HLA-C    | 1 | -0.4535923 | 1.71E-34  | 3.13E-30  | 0.852 | 0.974 |
| HIST1H4C | 1 | -0.4566251 | 6.22E-27  | 1.14E-22  | 0.372 | 0.662 |
| ENPP1    | 1 | -0.4585772 | 1.58E-33  | 2.89E-29  | 0.203 | 0.555 |
| PCBP2    | 1 | -0.4629226 | 2.28E-47  | 4.17E-43  | 0.881 | 0.982 |
| GNAS     | 1 | -0.4634043 | 1.24E-34  | 2.26E-30  | 0.566 | 0.817 |
| PABPC1   | 1 | -0.4659922 | 4.38E-44  | 7.99E-40  | 0.854 | 0.974 |
| HOXC10   | 1 | -0.4667046 | 1.75E-33  | 3.20E-29  | 0.591 | 0.84  |
| TPM1     | 1 | -0.4709793 | 9.82E-24  | 1.79E-19  | 0.381 | 0.645 |
| CYR61    | 1 | -0.4717019 | 2.45E-21  | 4.48E-17  | 0.311 | 0.613 |
| RPL37    | 1 | -0.4751083 | 3.90E-100 | 7.11E-96  | 1     | 1     |
| RPS27A   | 1 | -0.4766624 | 2.05E-120 | 3.75E-116 | 1     | 1     |
| VIM      | 1 | -0.479089  | 5.53E-43  | 1.01E-38  | 1     | 1     |
| RPS13    | 1 | -0.4821495 | 2.98E-99  | 5.44E-95  | 1     | 1     |
| RPL13A   | 1 | -0.483419  | 5.46E-122 | 9.96E-118 | 1     | 1     |
| HLA-B    | 1 | -0.4928451 | 3.81E-33  | 6.96E-29  | 0.767 | 0.934 |
| MAGED1   | 1 | -0.5015916 | 3.89E-11  | 7.11E-07  | 0.242 | 0.421 |
| H3F3A    | 1 | -0.5017351 | 9.09E-59  | 1.66E-54  | 0.934 | 0.998 |
| GPX3     | 1 | -0.5050638 | 9.45E-39  | 1.72E-34  | 0.959 | 0.997 |
| SEC11A   | 1 | -0.5051824 | 5.84E-50  | 1.07E-45  | 0.747 | 0.939 |
| SSPN     | 1 | -0.5068556 | 1.67E-37  | 3.04E-33  | 0.233 | 0.608 |
| TUBB     | 1 | -0.5096702 | 5.19E-40  | 9.46E-36  | 0.646 | 0.888 |
| ARHGAP29 | 1 | -0.5113703 | 2.00E-29  | 3.65E-25  | 0.352 | 0.645 |
| CCDC102B | 1 | -0.5151531 | 5.84E-46  | 1.07E-41  | 0.037 | 0.425 |
| PTRF     | 1 | -0.5155056 | 1.04E-37  | 1.90E-33  | 0.345 | 0.691 |

|          |   |            |           |           |       |       |
|----------|---|------------|-----------|-----------|-------|-------|
| UQCRB    | 1 | -0.5166824 | 2.30E-63  | 4.20E-59  | 0.963 | 1     |
| EEF1B2   | 1 | -0.5192653 | 9.63E-66  | 1.76E-61  | 0.977 | 0.997 |
| RPL23A   | 1 | -0.5257577 | 1.13E-123 | 2.06E-119 | 1     | 1     |
| SLC44A1  | 1 | -0.5337512 | 1.89E-38  | 3.45E-34  | 0.178 | 0.535 |
| RPS29    | 1 | -0.5342767 | 3.86E-112 | 7.05E-108 | 1     | 1     |
| CTGF     | 1 | -0.5348426 | 1.54E-19  | 2.80E-15  | 0.358 | 0.627 |
| MOXD1    | 1 | -0.5356866 | 2.79E-41  | 5.10E-37  | 0.135 | 0.519 |
| RPL30    | 1 | -0.536289  | 7.69E-117 | 1.40E-112 | 1     | 1     |
| SSR3     | 1 | -0.5396284 | 1.61E-47  | 2.94E-43  | 0.858 | 0.966 |
| MT-ND4   | 1 | -0.5406167 | 2.25E-31  | 4.10E-27  | 0.963 | 0.966 |
| SSR2     | 1 | -0.5463849 | 2.86E-54  | 5.22E-50  | 0.733 | 0.954 |
| RPL34    | 1 | -0.5578183 | 1.22E-122 | 2.23E-118 | 1     | 1     |
| NPC2     | 1 | -0.5578434 | 5.30E-71  | 9.67E-67  | 0.966 | 0.998 |
| EIF3L    | 1 | -0.5592207 | 8.36E-59  | 1.53E-54  | 0.795 | 0.977 |
| RPS3A    | 1 | -0.5604116 | 1.45E-127 | 2.64E-123 | 1     | 1     |
| RPL23    | 1 | -0.5652015 | 1.01E-95  | 1.84E-91  | 0.995 | 1     |
| EIF4B    | 1 | -0.5658737 | 5.65E-51  | 1.03E-46  | 0.765 | 0.951 |
| CD9      | 1 | -0.5673619 | 2.64E-39  | 4.82E-35  | 0.409 | 0.75  |
| TPT1     | 1 | -0.5708823 | 2.14E-108 | 3.90E-104 | 1     | 1     |
| RPS17    | 1 | -0.5743028 | 3.30E-112 | 6.03E-108 | 1     | 1     |
| RPLP2    | 1 | -0.5753994 | 2.46E-127 | 4.48E-123 | 1     | 1     |
| CITED2   | 1 | -0.5792091 | 1.87E-33  | 3.42E-29  | 0.301 | 0.651 |
| RHOBTB3  | 1 | -0.5873571 | 4.31E-46  | 7.87E-42  | 0.553 | 0.865 |
| RPL7     | 1 | -0.6000961 | 1.88E-110 | 3.43E-106 | 1     | 1     |
| RPL4     | 1 | -0.6037221 | 2.27E-102 | 4.15E-98  | 1     | 1     |
| RPS16    | 1 | -0.6068979 | 5.71E-126 | 1.04E-121 | 1     | 1     |
| RPL18    | 1 | -0.6085816 | 2.98E-126 | 5.44E-122 | 1     | 1     |
| RPL10A   | 1 | -0.6169387 | 1.43E-111 | 2.61E-107 | 1     | 1     |
| SERPINA5 | 1 | -0.6201736 | 2.71E-43  | 4.94E-39  | 0.612 | 0.854 |
| EEF1A1   | 1 | -0.6307747 | 5.21E-119 | 9.51E-115 | 1     | 1     |
| P4HB     | 1 | -0.6309404 | 1.96E-54  | 3.57E-50  | 0.813 | 0.978 |
| YBX3     | 1 | -0.6333882 | 9.17E-65  | 1.67E-60  | 0.719 | 0.971 |
| THY1     | 1 | -0.6367243 | 8.02E-36  | 1.46E-31  | 0.308 | 0.648 |
| ACTG1    | 1 | -0.6466559 | 1.64E-50  | 2.99E-46  | 0.888 | 0.975 |
| TCF4     | 1 | -0.6480408 | 1.14E-44  | 2.07E-40  | 0.368 | 0.728 |
| EEF2     | 1 | -0.6641939 | 8.33E-68  | 1.52E-63  | 0.975 | 1     |
| NEAT1    | 1 | -0.6718664 | 7.44E-64  | 1.36E-59  | 0.986 | 1     |
| RPS8     | 1 | -0.6738944 | 7.11E-136 | 1.30E-131 | 1     | 1     |
| MT-CO2   | 1 | -0.6967343 | 1.99E-42  | 3.64E-38  | 0.945 | 0.972 |

| SLC14A1  | 1       | -0.6976955 | 7.53E-53  | 1.37E-48  | 0.326 | 0.737 |
|----------|---------|------------|-----------|-----------|-------|-------|
| HIST1H1C | 1       | -0.711753  | 8.18E-33  | 1.49E-28  | 0.189 | 0.528 |
| TSC22D1  | 1       | -0.7184128 | 3.30E-35  | 6.02E-31  | 0.779 | 0.935 |
| CCNI     | 1       | -0.7257413 | 6.27E-104 | 1.14E-99  | 0.986 | 1     |
| MT-ND1   | 1       | -0.7299649 | 4.89E-45  | 8.92E-41  | 0.584 | 0.851 |
| RPLP0    | 1       | -0.7761294 | 5.96E-141 | 1.09E-136 | 1     | 1     |
| B2M      | 1       | -0.7907609 | 1.73E-103 | 3.16E-99  | 0.993 | 1     |
| PAX1     | 1       | -0.8065734 | 1.81E-72  | 3.31E-68  | 0.594 | 0.949 |
| MT-CO1   | 1       | -0.8153655 | 1.26E-51  | 2.30E-47  | 0.947 | 0.969 |
| MT-ATP6  | 1       | -0.8280482 | 4.89E-51  | 8.93E-47  | 0.756 | 0.922 |
| CRTAP    | 1       | -0.8339431 | 3.83E-100 | 6.99E-96  | 0.523 | 0.946 |
| ISLR     | 1       | -0.8436491 | 1.13E-73  | 2.06E-69  | 0.416 | 0.862 |
| MT-CO3   | 1       | -0.8680193 | 1.57E-56  | 2.87E-52  | 0.84  | 0.948 |
| XAGE2    | 1       | -0.8701211 | 3.39E-26  | 6.19E-22  | 0.016 | 0.253 |
| FTH1     | 1       | -0.883484  | 4.34E-127 | 7.91E-123 | 1     | 1     |
| MT-ND2   | 1       | -0.8907815 | 2.13E-48  | 3.88E-44  | 0.603 | 0.857 |
| CAPS     | 1       | -0.8934464 | 1.99E-67  | 3.63E-63  | 0.733 | 0.972 |
| MT-CYB   | 1       | -0.904296  | 1.54E-57  | 2.81E-53  | 0.619 | 0.905 |
| EIF3H    | 1       | -0.9081249 | 5.91E-121 | 1.08E-116 | 0.945 | 1     |
| COL2A1   | 1       | -0.9371047 | 4.83E-46  | 8.81E-42  | 0.717 | 0.969 |
| SLC40A1  | 1       | -0.983289  | 5.04E-72  | 9.19E-68  | 0.16  | 0.688 |
| RPS20    | 1       | -1.0073216 | 3.92E-160 | 7.16E-156 | 0.995 | 1     |
| SPARC    | 1       | -1.0304494 | 4.10E-68  | 7.48E-64  | 0.53  | 0.902 |
| RPS11    | 1       | -1.0316865 | 1.21E-157 | 2.21E-153 | 0.982 | 1     |
| ZFP36L2  | 1       | -1.049991  | 1.98E-64  | 3.62E-60  | 0.169 | 0.664 |
| MT-ND3   | 1       | -1.0642473 | 2.42E-74  | 4.41E-70  | 0.587 | 0.897 |
| CRISPLD1 | 1       | -1.0760114 | 1.50E-53  | 2.73E-49  | 0.146 | 0.588 |
| ADIRF    | 1       | -1.0843082 | 1.28E-73  | 2.33E-69  | 0.381 | 0.856 |
| OGN      | 1       | -1.089475  | 2.33E-94  | 4.25E-90  | 0.938 | 1     |
| APOD     | 1       | -1.1182894 | 2.74E-64  | 5.01E-60  | 0.226 | 0.722 |
| CLEC3A   | 1       | -1.2390386 | 6.53E-80  | 1.19E-75  | 0.587 | 0.949 |
| SPTSSB   | 1       | -1.2941568 | 1.69E-82  | 3.09E-78  | 0.043 | 0.641 |
| FRZB     | 1       | -1.5319439 | 2.32E-74  | 4.23E-70  | 0.26  | 0.794 |
| gene     | cluster | avg_logFC  | p_val     | p_val_adj | pct.1 | pct.2 |
| SPP1     | 2       | 1.44110631 | 1.93E-58  | 3.53E-54  | 0.638 | 0.068 |
| PRG4     | 2       | 1.3586778  | 9.44E-45  | 1.72E-40  | 0.477 | 0.031 |
| CHI3L2   | 2       | 1.32984446 | 4.87E-69  | 8.88E-65  | 0.928 | 0.452 |
| PLA2G2A  | 2       | 1.31123869 | 7.41E-37  | 1.35E-32  | 0.749 | 0.299 |
| S100A2   | 2       | 1.14148248 | 1.36E-27  | 2.48E-23  | 0.59  | 0.254 |

|           |   |            |          |            |       |       |
|-----------|---|------------|----------|------------|-------|-------|
| VEGFA     | 2 | 1.12180214 | 4.16E-63 | 7.59E-59   | 0.828 | 0.35  |
| PTGS2     | 2 | 1.05995462 | 5.22E-64 | 9.53E-60   | 0.629 | 0.042 |
| COMP      | 2 | 0.965253   | 3.71E-38 | 6.77E-34   | 0.941 | 0.74  |
| DDIT4L    | 2 | 0.95242239 | 1.04E-44 | 1.90E-40   | 0.844 | 0.435 |
| G0S2      | 2 | 0.94252857 | 3.90E-09 | 7.11E-05   | 0.376 | 0.203 |
| CCDC85B   | 2 | 0.93270897 | 4.00E-41 | 7.30E-37   | 0.914 | 0.701 |
| PPP3CA    | 2 | 0.87880683 | 4.91E-47 | 8.96E-43   | 0.934 | 0.644 |
| CTSL      | 2 | 0.85131129 | 3.47E-19 | 6.34E-15   | 0.622 | 0.393 |
| BMP2      | 2 | 0.84873235 | 6.56E-37 | 1.20E-32   | 0.448 | 0.051 |
| UPP1      | 2 | 0.8406463  | 3.43E-34 | 6.26E-30   | 0.468 | 0.085 |
| MRPS6     | 2 | 0.83255811 | 7.88E-27 | 1.44E-22   | 0.957 | 0.879 |
| TGFB1     | 2 | 0.83118944 | 1.98E-43 | 3.61E-39   | 0.64  | 0.184 |
| MT2A      | 2 | 0.81265381 | 7.76E-41 | 1.42E-36   | 1     | 1     |
| SOD2      | 2 | 0.79644767 | 2.45E-34 | 4.46E-30   | 0.993 | 0.907 |
| MT1G      | 2 | 0.77783518 | 3.43E-40 | 6.26E-36   | 1     | 0.997 |
| WTAP      | 2 | 0.77318099 | 3.62E-31 | 6.60E-27   | 0.812 | 0.554 |
| MT1X      | 2 | 0.76063181 | 3.01E-48 | 5.49E-44   | 1     | 1     |
| PHLDA1    | 2 | 0.74319627 | 4.63E-32 | 8.45E-28   | 0.394 | 0.04  |
| FN1       | 2 | 0.72857922 | 7.20E-57 | 1.31E-52   | 1     | 0.994 |
| IGFBP3    | 2 | 0.71614489 | 9.17E-24 | 1.67E-19   | 0.355 | 0.065 |
| SLC25A37  | 2 | 0.70111707 | 5.73E-40 | 1.05E-35   | 0.912 | 0.588 |
| ERO1A     | 2 | 0.68406959 | 3.34E-30 | 6.10E-26   | 0.661 | 0.339 |
| BTG1      | 2 | 0.68296818 | 1.73E-36 | 3.16E-32   | 0.982 | 0.912 |
| ADM       | 2 | 0.66680984 | 5.33E-21 | 9.72E-17   | 0.803 | 0.54  |
| HILPDA    | 2 | 0.66581907 | 4.86E-28 | 8.87E-24   | 0.643 | 0.291 |
| CTSD      | 2 | 0.66460333 | 9.11E-17 | 1.66E-12   | 0.991 | 0.935 |
| TNFRSF12A | 2 | 0.6546399  | 3.42E-19 | 6.24E-15   | 0.4   | 0.133 |
| FOSL1     | 2 | 0.64746911 | 5.03E-28 | 9.18E-24   | 0.335 | 0.025 |
| BHLHE40   | 2 | 0.63900629 | 6.83E-22 | 1.25E-17   | 0.575 | 0.291 |
| ENO2      | 2 | 0.61278473 | 2.44E-33 | 4.45E-29   | 0.654 | 0.28  |
| PTP4A1    | 2 | 0.61226461 | 1.36E-19 | 2.49E-15   | 0.586 | 0.35  |
| PMP22     | 2 | 0.60694649 | 1.57E-26 | 2.86E-22   | 0.796 | 0.537 |
| DDIT3     | 2 | 0.6029596  | 1.83E-27 | 3.35E-23   | 0.645 | 0.308 |
| TM4SF1    | 2 | 0.59528264 | 1.21E-07 | 0.00221453 | 0.443 | 0.305 |
| ORM1      | 2 | 0.59027687 | 1.48E-08 | 0.00026933 | 0.371 | 0.203 |
| MT1H      | 2 | 0.58141667 | 6.07E-24 | 1.11E-19   | 0.984 | 0.929 |
| ARF6      | 2 | 0.57968512 | 5.00E-26 | 9.12E-22   | 0.661 | 0.373 |
| BZW1      | 2 | 0.56962911 | 1.18E-26 | 2.15E-22   | 0.692 | 0.393 |
| STK17A    | 2 | 0.56798404 | 8.12E-17 | 1.48E-12   | 0.396 | 0.158 |

|          |   |            |          |            |       |       |
|----------|---|------------|----------|------------|-------|-------|
| SERPINE2 | 2 | 0.55799368 | 4.40E-25 | 8.02E-21   | 0.998 | 0.986 |
| CD44     | 2 | 0.54799727 | 8.03E-37 | 1.47E-32   | 0.916 | 0.636 |
| CTHRC1   | 2 | 0.54685992 | 1.40E-33 | 2.56E-29   | 0.423 | 0.051 |
| IGFBP5   | 2 | 0.53688559 | 2.28E-17 | 4.16E-13   | 0.344 | 0.096 |
| NDRG1    | 2 | 0.52359379 | 2.96E-20 | 5.40E-16   | 0.645 | 0.398 |
| TREM1    | 2 | 0.51912149 | 5.12E-35 | 9.34E-31   | 0.362 | 0.006 |
| PPP1CB   | 2 | 0.50689997 | 1.28E-14 | 2.33E-10   | 0.826 | 0.701 |
| CA9      | 2 | 0.50320109 | 5.30E-20 | 9.66E-16   | 0.543 | 0.271 |
| SLC2A1   | 2 | 0.50212596 | 2.00E-20 | 3.64E-16   | 0.428 | 0.15  |
| FAM162A  | 2 | 0.50185738 | 6.04E-27 | 1.10E-22   | 0.959 | 0.842 |
| EGLN3    | 2 | 0.49959373 | 1.25E-20 | 2.29E-16   | 0.475 | 0.189 |
| AK2      | 2 | 0.49643471 | 2.40E-14 | 4.38E-10   | 0.697 | 0.585 |
| EGR1     | 2 | 0.49118765 | 8.33E-10 | 1.52E-05   | 0.416 | 0.243 |
| EPYC     | 2 | 0.47803873 | 1.88E-14 | 3.43E-10   | 0.351 | 0.124 |
| HLA-DRB1 | 2 | 0.47113421 | 3.99E-18 | 7.28E-14   | 0.455 | 0.192 |
| NRP2     | 2 | 0.46587104 | 6.68E-24 | 1.22E-19   | 0.369 | 0.071 |
| SLC3A2   | 2 | 0.46308588 | 1.74E-14 | 3.18E-10   | 0.491 | 0.254 |
| C11orf96 | 2 | 0.46014509 | 1.57E-16 | 2.87E-12   | 0.231 | 0.028 |
| NAMPT    | 2 | 0.45328498 | 1.46E-20 | 2.66E-16   | 0.633 | 0.37  |
| WDR45B   | 2 | 0.44373524 | 1.80E-19 | 3.29E-15   | 0.498 | 0.215 |
| ARRDC3   | 2 | 0.43762222 | 1.63E-09 | 2.97E-05   | 0.473 | 0.316 |
| IFRD1    | 2 | 0.43607444 | 1.43E-17 | 2.61E-13   | 0.629 | 0.41  |
| RNF145   | 2 | 0.43035721 | 4.78E-17 | 8.73E-13   | 0.511 | 0.254 |
| PGK1     | 2 | 0.42792721 | 1.00E-16 | 1.83E-12   | 0.966 | 0.904 |
| CLK1     | 2 | 0.42071935 | 1.54E-19 | 2.81E-15   | 0.654 | 0.404 |
| NRN1     | 2 | 0.41793972 | 1.22E-06 | 0.02224207 | 0.5   | 0.331 |
| PPP1R15A | 2 | 0.41687135 | 8.73E-20 | 1.59E-15   | 0.446 | 0.158 |
| CRTAC1   | 2 | 0.40869196 | 1.90E-19 | 3.47E-15   | 0.425 | 0.144 |
| ERRFI1   | 2 | 0.40659569 | 2.61E-13 | 4.76E-09   | 0.373 | 0.153 |
| TMEM45A  | 2 | 0.40542996 | 2.58E-16 | 4.71E-12   | 0.885 | 0.782 |
| ISG20    | 2 | 0.40179454 | 6.72E-16 | 1.23E-11   | 0.568 | 0.333 |
| ATP6V1G1 | 2 | 0.40160815 | 1.61E-25 | 2.95E-21   | 0.986 | 0.927 |
| ZNF385D  | 2 | 0.39516815 | 5.50E-16 | 1.00E-11   | 0.717 | 0.523 |
| PDE4B    | 2 | 0.39247943 | 1.12E-21 | 2.04E-17   | 0.369 | 0.082 |
| SPRY2    | 2 | 0.39244194 | 2.30E-22 | 4.20E-18   | 0.317 | 0.045 |
| NT5C3A   | 2 | 0.38924705 | 6.15E-19 | 1.12E-14   | 0.398 | 0.124 |
| SGIP1    | 2 | 0.38763249 | 7.25E-22 | 1.32E-17   | 0.274 | 0.023 |
| GPX1     | 2 | 0.38727755 | 2.57E-19 | 4.70E-15   | 0.928 | 0.768 |
| SLC5A3   | 2 | 0.38580775 | 5.14E-08 | 0.00093713 | 0.543 | 0.41  |

|          |   |            |          |            |       |       |
|----------|---|------------|----------|------------|-------|-------|
| VAPA     | 2 | 0.38353289 | 1.59E-19 | 2.90E-15   | 0.934 | 0.845 |
| RABGGTB  | 2 | 0.38016243 | 9.12E-19 | 1.66E-14   | 0.756 | 0.537 |
| SLC39A8  | 2 | 0.37677697 | 2.84E-14 | 5.18E-10   | 0.493 | 0.266 |
| ARPP19   | 2 | 0.37463936 | 4.24E-15 | 7.73E-11   | 0.62  | 0.401 |
| MMP3     | 2 | 0.37384492 | 4.82E-09 | 8.80E-05   | 0.921 | 0.797 |
| CFD      | 2 | 0.37349574 | 2.97E-14 | 5.42E-10   | 0.299 | 0.082 |
| GAPDH    | 2 | 0.37160953 | 1.52E-10 | 2.77E-06   | 1     | 1     |
| GBE1     | 2 | 0.3697097  | 8.26E-10 | 1.51E-05   | 0.627 | 0.525 |
| EIF4EBP1 | 2 | 0.36133482 | 1.76E-09 | 3.21E-05   | 0.561 | 0.39  |
| TMSB10   | 2 | 0.35993266 | 4.29E-13 | 7.83E-09   | 0.993 | 0.977 |
| HMGA1    | 2 | 0.35487441 | 4.77E-07 | 0.00871057 | 0.353 | 0.218 |
| COX17    | 2 | 0.35439853 | 1.02E-13 | 1.87E-09   | 0.819 | 0.706 |
| RNMT     | 2 | 0.35296047 | 6.25E-13 | 1.14E-08   | 0.509 | 0.299 |
| SMOX     | 2 | 0.34726473 | 1.45E-09 | 2.64E-05   | 0.321 | 0.15  |
| PPFIBP1  | 2 | 0.34649177 | 4.15E-09 | 7.57E-05   | 0.509 | 0.35  |
| MT1M     | 2 | 0.34148255 | 5.34E-09 | 9.74E-05   | 0.808 | 0.675 |
| XBP1     | 2 | 0.33842824 | 7.79E-10 | 1.42E-05   | 0.665 | 0.534 |
| PTGES3   | 2 | 0.33815339 | 2.47E-19 | 4.50E-15   | 0.962 | 0.898 |
| SLC25A36 | 2 | 0.33734162 | 1.28E-11 | 2.33E-07   | 0.577 | 0.41  |
| SNHG12   | 2 | 0.3334791  | 8.42E-11 | 1.54E-06   | 0.466 | 0.28  |
| CD55     | 2 | 0.33233335 | 6.17E-11 | 1.13E-06   | 0.611 | 0.421 |
| DNAJB9   | 2 | 0.32916395 | 3.18E-09 | 5.81E-05   | 0.649 | 0.497 |
| CLEC2B   | 2 | 0.32899444 | 6.22E-07 | 0.01134522 | 0.219 | 0.093 |
| CDK5RAP2 | 2 | 0.3288973  | 6.94E-09 | 0.00012669 | 0.344 | 0.175 |
| PLA2G4A  | 2 | 0.32775052 | 8.01E-16 | 1.46E-11   | 0.385 | 0.141 |
| GPRC5A   | 2 | 0.32643784 | 1.54E-17 | 2.80E-13   | 0.337 | 0.09  |
| SELK     | 2 | 0.32576836 | 6.52E-16 | 1.19E-11   | 0.885 | 0.774 |
| ZNF593   | 2 | 0.3251803  | 9.96E-14 | 1.82E-09   | 0.527 | 0.291 |
| EMP3     | 2 | 0.32246462 | 8.88E-12 | 1.62E-07   | 0.896 | 0.831 |
| MIF      | 2 | 0.31568041 | 2.68E-22 | 4.90E-18   | 1     | 1     |
| ARF4     | 2 | 0.31516535 | 7.99E-10 | 1.46E-05   | 0.706 | 0.576 |
| ADAMTS6  | 2 | 0.3128732  | 6.23E-10 | 1.14E-05   | 0.244 | 0.085 |
| CTNNB1   | 2 | 0.31200096 | 1.50E-07 | 0.00274355 | 0.441 | 0.282 |
| RAB1A    | 2 | 0.31106635 | 5.75E-11 | 1.05E-06   | 0.769 | 0.633 |
| C4orf48  | 2 | 0.30784437 | 3.81E-11 | 6.95E-07   | 0.419 | 0.212 |
| ANKRD37  | 2 | 0.30768114 | 1.78E-11 | 3.24E-07   | 0.407 | 0.203 |
| MED21    | 2 | 0.30675597 | 3.78E-14 | 6.89E-10   | 0.523 | 0.282 |
| GOLT1B   | 2 | 0.30458171 | 2.24E-10 | 4.08E-06   | 0.43  | 0.246 |
| KLF3     | 2 | 0.30418682 | 1.14E-09 | 2.07E-05   | 0.353 | 0.175 |

|            |   |            |          |            |       |       |
|------------|---|------------|----------|------------|-------|-------|
| BNIP3      | 2 | 0.30131803 | 3.37E-09 | 6.15E-05   | 0.998 | 0.997 |
| SLC20A1    | 2 | 0.29920236 | 7.46E-15 | 1.36E-10   | 0.287 | 0.073 |
| RELB       | 2 | 0.29833892 | 5.34E-15 | 9.74E-11   | 0.333 | 0.102 |
| CCNG2      | 2 | 0.29696646 | 7.84E-08 | 0.00143124 | 0.484 | 0.336 |
| RAB13      | 2 | 0.29693178 | 1.92E-11 | 3.50E-07   | 0.889 | 0.836 |
| TRMT112    | 2 | 0.28932932 | 1.06E-12 | 1.93E-08   | 0.921 | 0.859 |
| CCND1      | 2 | 0.28881265 | 2.18E-16 | 3.98E-12   | 0.274 | 0.051 |
| WSB1       | 2 | 0.28798071 | 6.79E-11 | 1.24E-06   | 0.837 | 0.729 |
| BAALC      | 2 | 0.28773681 | 9.25E-08 | 0.00168694 | 0.523 | 0.359 |
| A4GALT     | 2 | 0.28550139 | 2.78E-18 | 5.07E-14   | 0.244 | 0.025 |
| MGST1      | 2 | 0.28523483 | 3.18E-11 | 5.80E-07   | 0.378 | 0.167 |
| TMEM38B    | 2 | 0.28423075 | 9.21E-10 | 1.68E-05   | 0.527 | 0.347 |
| SERPINE1   | 2 | 0.28331814 | 2.37E-16 | 4.33E-12   | 0.231 | 0.028 |
| CLU        | 2 | 0.28197171 | 8.80E-08 | 0.00160657 | 1     | 1     |
| PLAUR      | 2 | 0.28189221 | 4.59E-10 | 8.37E-06   | 0.369 | 0.181 |
| NTMT1      | 2 | 0.27981096 | 9.15E-10 | 1.67E-05   | 0.482 | 0.308 |
| ZFYVE16    | 2 | 0.27946679 | 1.98E-16 | 3.61E-12   | 0.326 | 0.088 |
| CLDND1     | 2 | 0.2783687  | 9.08E-12 | 1.66E-07   | 0.473 | 0.257 |
| SMIM3      | 2 | 0.27607363 | 6.69E-13 | 1.22E-08   | 0.31  | 0.105 |
| ATP6V0E1   | 2 | 0.27589735 | 4.96E-11 | 9.05E-07   | 0.93  | 0.836 |
| TPD52      | 2 | 0.27268327 | 1.44E-08 | 0.00026343 | 0.676 | 0.556 |
| EIF1B      | 2 | 0.27244004 | 1.30E-11 | 2.38E-07   | 0.74  | 0.545 |
| NBPF14     | 2 | 0.2723623  | 1.23E-17 | 2.24E-13   | 0.31  | 0.068 |
| DNER       | 2 | 0.27126835 | 7.93E-08 | 0.00144618 | 0.518 | 0.373 |
| MTHFD2     | 2 | 0.27002528 | 3.65E-07 | 0.0066684  | 0.6   | 0.46  |
| AVPI1      | 2 | 0.26995719 | 5.75E-10 | 1.05E-05   | 0.385 | 0.195 |
| IER3       | 2 | 0.26776955 | 7.19E-07 | 0.01311843 | 0.274 | 0.138 |
| EPS8       | 2 | 0.26594884 | 1.14E-11 | 2.07E-07   | 0.321 | 0.124 |
| HMGA2      | 2 | 0.26479778 | 3.95E-19 | 7.22E-15   | 0.201 | 0     |
| SNRNP27    | 2 | 0.2636541  | 6.33E-10 | 1.15E-05   | 0.48  | 0.288 |
| EVI2A      | 2 | 0.25544975 | 1.06E-13 | 1.94E-09   | 0.285 | 0.079 |
| CSGALNACT2 | 2 | 0.25517034 | 9.81E-09 | 0.00017894 | 0.281 | 0.124 |
| NOL7       | 2 | 0.25362902 | 1.21E-07 | 0.00221547 | 0.627 | 0.5   |
| FAM210A    | 2 | 0.25353731 | 4.28E-10 | 7.81E-06   | 0.376 | 0.186 |
| RNF126     | 2 | 0.25353731 | 1.49E-08 | 0.00027162 | 0.348 | 0.184 |
| PRR34-AS1  | 2 | 0.25052552 | 2.11E-13 | 3.84E-09   | 0.314 | 0.102 |
| OAF        | 2 | -0.2502901 | 3.45E-12 | 6.30E-08   | 0.145 | 0.35  |
| TBL1XR1    | 2 | -0.2504341 | 1.69E-10 | 3.08E-06   | 0.206 | 0.401 |
| KHDRBS3    | 2 | -0.2504924 | 6.66E-20 | 1.22E-15   | 0.016 | 0.215 |

|              |   |            |          |            |       |       |
|--------------|---|------------|----------|------------|-------|-------|
| CMB9-22P13.1 | 2 | -0.2515136 | 1.04E-07 | 0.00189258 | 0.387 | 0.542 |
| PRDX5        | 2 | -0.2525598 | 8.61E-14 | 1.57E-09   | 0.867 | 0.949 |
| COL9A2       | 2 | -0.2527396 | 1.58E-07 | 0.00289144 | 0.303 | 0.475 |
| MKX          | 2 | -0.2532943 | 1.51E-11 | 2.76E-07   | 0.17  | 0.373 |
| RPL26        | 2 | -0.2533017 | 5.18E-31 | 9.45E-27   | 1     | 1     |
| GNB2L1       | 2 | -0.2537016 | 5.25E-23 | 9.58E-19   | 1     | 1     |
| KDELR2       | 2 | -0.2538536 | 2.79E-10 | 5.10E-06   | 0.769 | 0.918 |
| PSAP         | 2 | -0.255395  | 5.33E-12 | 9.72E-08   | 0.923 | 0.975 |
| PARK7        | 2 | -0.2566451 | 4.91E-12 | 8.96E-08   | 0.808 | 0.927 |
| ARL6IP5      | 2 | -0.2568597 | 3.86E-09 | 7.04E-05   | 0.507 | 0.684 |
| NME2         | 2 | -0.2576306 | 5.90E-14 | 1.08E-09   | 0.176 | 0.404 |
| ANGPTL5      | 2 | -0.258118  | 4.65E-12 | 8.49E-08   | 0.176 | 0.387 |
| ZFAS1        | 2 | -0.2582488 | 8.63E-14 | 1.58E-09   | 0.998 | 0.997 |
| DSEL         | 2 | -0.2589024 | 1.59E-12 | 2.89E-08   | 0.072 | 0.249 |
| IDH2         | 2 | -0.2590542 | 2.26E-17 | 4.13E-13   | 0.077 | 0.305 |
| ZCRB1        | 2 | -0.2592666 | 9.59E-11 | 1.75E-06   | 0.396 | 0.602 |
| PRKCSH       | 2 | -0.2601286 | 4.10E-13 | 7.48E-09   | 0.267 | 0.503 |
| PTPRD-AS1    | 2 | -0.2602952 | 2.34E-10 | 4.28E-06   | 0.31  | 0.508 |
| RPS28        | 2 | -0.2608206 | 3.52E-38 | 6.42E-34   | 1     | 1     |
| SDC2         | 2 | -0.2612612 | 1.05E-11 | 1.91E-07   | 0.787 | 0.927 |
| GDI2         | 2 | -0.2614718 | 7.14E-09 | 0.00013031 | 0.611 | 0.751 |
| H1FX         | 2 | -0.2618733 | 8.50E-11 | 1.55E-06   | 0.179 | 0.367 |
| ISM1         | 2 | -0.2620183 | 4.80E-14 | 8.75E-10   | 0.09  | 0.294 |
| DMKN         | 2 | -0.2626436 | 2.12E-14 | 3.86E-10   | 0.29  | 0.556 |
| RPS14        | 2 | -0.263762  | 5.19E-42 | 9.47E-38   | 1     | 1     |
| HOXB6        | 2 | -0.2638309 | 4.06E-11 | 7.40E-07   | 0.233 | 0.435 |
| RPS15A       | 2 | -0.2638424 | 1.69E-39 | 3.08E-35   | 1     | 1     |
| PRCP         | 2 | -0.2639239 | 1.61E-13 | 2.95E-09   | 0.138 | 0.353 |
| SET          | 2 | -0.2642285 | 2.22E-09 | 4.06E-05   | 0.656 | 0.816 |
| ARPC1B       | 2 | -0.2643646 | 9.10E-12 | 1.66E-07   | 0.262 | 0.477 |
| RPS19        | 2 | -0.2647972 | 6.70E-38 | 1.22E-33   | 1     | 1     |
| DPYSL3       | 2 | -0.2659551 | 4.51E-14 | 8.23E-10   | 0.14  | 0.362 |
| RCN3         | 2 | -0.266538  | 6.56E-12 | 1.20E-07   | 0.242 | 0.463 |
| NUCKS1       | 2 | -0.2676309 | 7.60E-13 | 1.39E-08   | 0.538 | 0.74  |
| ZNF90        | 2 | -0.2688273 | 7.75E-11 | 1.41E-06   | 0.5   | 0.661 |
| IVNS1ABP     | 2 | -0.2693724 | 1.44E-07 | 0.00263476 | 0.719 | 0.822 |
| RP11-553L6.5 | 2 | -0.2696831 | 3.83E-14 | 7.00E-10   | 0.21  | 0.446 |
| C6orf48      | 2 | -0.270224  | 1.03E-10 | 1.87E-06   | 0.765 | 0.91  |
| TIMP2        | 2 | -0.2710816 | 2.66E-12 | 4.85E-08   | 0.511 | 0.723 |



|         |   |            |          |            |       |       |
|---------|---|------------|----------|------------|-------|-------|
| IGBP1   | 2 | -0.2720525 | 9.61E-11 | 1.75E-06   | 0.543 | 0.709 |
| LITAF   | 2 | -0.2720592 | 7.01E-11 | 1.28E-06   | 0.403 | 0.588 |
| TRPS1   | 2 | -0.2721628 | 8.86E-09 | 0.00016176 | 0.391 | 0.556 |
| IFI27L2 | 2 | -0.2724314 | 1.16E-10 | 2.12E-06   | 0.76  | 0.901 |
| RPL5    | 2 | -0.2724459 | 2.25E-27 | 4.11E-23   | 1     | 1     |
| TSPAN4  | 2 | -0.2727701 | 1.70E-12 | 3.11E-08   | 0.339 | 0.565 |
| CHPT1   | 2 | -0.2735466 | 1.49E-12 | 2.72E-08   | 0.532 | 0.734 |
| HSPA8   | 2 | -0.2738706 | 5.72E-09 | 0.00010443 | 0.317 | 0.489 |
| COL6A1  | 2 | -0.2742745 | 3.19E-09 | 5.82E-05   | 0.355 | 0.531 |
| VCAN    | 2 | -0.2744594 | 1.46E-07 | 0.00266404 | 0.405 | 0.568 |
| DAAM1   | 2 | -0.2751531 | 4.52E-11 | 8.25E-07   | 0.204 | 0.41  |
| IGFBP6  | 2 | -0.2753985 | 4.80E-09 | 8.76E-05   | 0.554 | 0.737 |
| RPL36AL | 2 | -0.2757431 | 9.43E-20 | 1.72E-15   | 0.998 | 0.997 |
| MALAT1  | 2 | -0.2776192 | 2.81E-10 | 5.13E-06   | 1     | 1     |
| FXVD6   | 2 | -0.2777834 | 4.26E-14 | 7.78E-10   | 0.758 | 0.932 |
| BRK1    | 2 | -0.2788382 | 1.43E-14 | 2.62E-10   | 0.812 | 0.932 |
| EIF2S3  | 2 | -0.2793722 | 7.84E-11 | 1.43E-06   | 0.482 | 0.698 |
| NDRG2   | 2 | -0.2798804 | 1.91E-20 | 3.48E-16   | 0.063 | 0.311 |
| SEP1    | 2 | -0.2807454 | 7.22E-14 | 1.32E-09   | 0.161 | 0.387 |
| BEX2    | 2 | -0.2810884 | 2.51E-13 | 4.58E-09   | 0.253 | 0.503 |
| ZIC1    | 2 | -0.2817592 | 4.70E-09 | 8.57E-05   | 0.179 | 0.347 |
| HSPB1   | 2 | -0.2818764 | 2.60E-11 | 4.75E-07   | 0.64  | 0.808 |
| MTDH    | 2 | -0.2827098 | 2.12E-12 | 3.86E-08   | 0.511 | 0.715 |
| RPS25   | 2 | -0.2828624 | 6.18E-39 | 1.13E-34   | 1     | 1     |
| COL6A2  | 2 | -0.2830203 | 2.21E-08 | 0.00040241 | 0.545 | 0.709 |
| PRDX6   | 2 | -0.283521  | 9.74E-14 | 1.78E-09   | 0.724 | 0.893 |
| SPON2   | 2 | -0.2842958 | 2.14E-11 | 3.90E-07   | 0.251 | 0.477 |
| RPS4X   | 2 | -0.2843425 | 4.84E-41 | 8.84E-37   | 1     | 1     |
| CYSTM1  | 2 | -0.2851341 | 4.81E-12 | 8.78E-08   | 0.428 | 0.633 |
| AHNAK2  | 2 | -0.2861571 | 1.22E-10 | 2.23E-06   | 0.296 | 0.511 |
| SLC29A1 | 2 | -0.2863385 | 8.62E-14 | 1.57E-09   | 0.244 | 0.48  |
| HMGB1   | 2 | -0.2864309 | 9.44E-13 | 1.72E-08   | 0.618 | 0.822 |
| RBMX    | 2 | -0.2865515 | 2.13E-12 | 3.88E-08   | 0.636 | 0.794 |
| RARRES3 | 2 | -0.2868214 | 1.31E-20 | 2.40E-16   | 0.043 | 0.277 |
| PGAM1   | 2 | -0.2875963 | 1.65E-13 | 3.02E-09   | 0.704 | 0.879 |
| RPL27A  | 2 | -0.2878737 | 3.34E-38 | 6.10E-34   | 1     | 1     |
| RPS3    | 2 | -0.2895055 | 1.45E-47 | 2.64E-43   | 1     | 1     |
| RPS21   | 2 | -0.2897192 | 1.81E-30 | 3.31E-26   | 1     | 1     |
| RNF130  | 2 | -0.2897751 | 1.33E-14 | 2.43E-10   | 0.473 | 0.729 |

|               |   |            |          |            |       |       |
|---------------|---|------------|----------|------------|-------|-------|
| DDR2          | 2 | -0.2898753 | 1.38E-11 | 2.52E-07   | 0.455 | 0.678 |
| AFF3          | 2 | -0.291279  | 3.69E-17 | 6.73E-13   | 0.09  | 0.322 |
| HERPUD1       | 2 | -0.2913968 | 4.63E-13 | 8.45E-09   | 0.378 | 0.605 |
| MYL12B        | 2 | -0.2937049 | 9.35E-13 | 1.71E-08   | 0.462 | 0.664 |
| EIF3E         | 2 | -0.2939896 | 7.20E-19 | 1.31E-14   | 0.998 | 0.994 |
| RAC1          | 2 | -0.2940626 | 2.26E-15 | 4.13E-11   | 0.851 | 0.955 |
| RPL15         | 2 | -0.2947023 | 2.07E-54 | 3.78E-50   | 1     | 1     |
| IGFBP7        | 2 | -0.2953656 | 1.95E-08 | 0.00035575 | 0.855 | 0.907 |
| COMMD6        | 2 | -0.2965949 | 5.56E-26 | 1.01E-21   | 0.998 | 1     |
| RPL28         | 2 | -0.2968612 | 6.72E-41 | 1.23E-36   | 1     | 1     |
| NFIC          | 2 | -0.296931  | 4.23E-13 | 7.72E-09   | 0.296 | 0.525 |
| FBL           | 2 | -0.2970179 | 3.15E-14 | 5.75E-10   | 0.473 | 0.698 |
| PLXDC2        | 2 | -0.2979989 | 4.72E-09 | 8.62E-05   | 0.475 | 0.638 |
| RPL11         | 2 | -0.2984471 | 1.10E-45 | 2.01E-41   | 1     | 1     |
| CEBPD         | 2 | -0.2990218 | 3.80E-09 | 6.94E-05   | 0.731 | 0.864 |
| NACA          | 2 | -0.2996828 | 2.90E-32 | 5.29E-28   | 1     | 1     |
| NMRK1         | 2 | -0.3000609 | 2.20E-14 | 4.02E-10   | 0.251 | 0.492 |
| RP5-1097P24.1 | 2 | -0.3007656 | 2.91E-16 | 5.30E-12   | 0.163 | 0.415 |
| RPL7A         | 2 | -0.3009925 | 5.15E-41 | 9.40E-37   | 1     | 1     |
| ST13          | 2 | -0.3019268 | 7.90E-16 | 1.44E-11   | 0.921 | 0.963 |
| MYLK          | 2 | -0.3032384 | 1.31E-15 | 2.38E-11   | 0.131 | 0.364 |
| NINJ1         | 2 | -0.30457   | 2.10E-13 | 3.84E-09   | 0.5   | 0.701 |
| C19orf43      | 2 | -0.3045841 | 1.02E-16 | 1.87E-12   | 0.751 | 0.912 |
| NDUFC2        | 2 | -0.3056499 | 8.53E-12 | 1.56E-07   | 0.606 | 0.771 |
| S100A13       | 2 | -0.3072096 | 7.27E-24 | 1.33E-19   | 0.995 | 1     |
| CD63          | 2 | -0.3078577 | 4.81E-18 | 8.77E-14   | 1     | 1     |
| SNAI2         | 2 | -0.3080331 | 3.86E-11 | 7.04E-07   | 0.38  | 0.593 |
| KRT8          | 2 | -0.3084455 | 7.81E-15 | 1.43E-10   | 0.24  | 0.492 |
| LRRC2         | 2 | -0.3085534 | 1.32E-18 | 2.41E-14   | 0.154 | 0.429 |
| GLTSCR2       | 2 | -0.3092759 | 2.48E-15 | 4.52E-11   | 0.889 | 0.958 |
| PPIB          | 2 | -0.3099143 | 8.48E-13 | 1.55E-08   | 0.833 | 0.915 |
| NUCB2         | 2 | -0.3099173 | 1.34E-09 | 2.45E-05   | 0.344 | 0.52  |
| FTL           | 2 | -0.3107751 | 8.12E-28 | 1.48E-23   | 1     | 1     |
| RPS6          | 2 | -0.3109903 | 1.54E-56 | 2.82E-52   | 1     | 1     |
| PLP2          | 2 | -0.3112883 | 6.11E-15 | 1.12E-10   | 0.681 | 0.879 |
| PRDX4         | 2 | -0.3127334 | 4.73E-12 | 8.63E-08   | 0.706 | 0.859 |
| CRYAB         | 2 | -0.3143114 | 7.61E-08 | 0.00138795 | 0.656 | 0.794 |
| EIF3M         | 2 | -0.3147291 | 7.45E-15 | 1.36E-10   | 0.466 | 0.698 |
| RPS12         | 2 | -0.3154933 | 5.73E-41 | 1.05E-36   | 1     | 1     |

|            |   |            |          |            |       |       |
|------------|---|------------|----------|------------|-------|-------|
| RPL35      | 2 | -0.3156868 | 2.59E-46 | 4.72E-42   | 1     | 1     |
| RPS9       | 2 | -0.3157938 | 2.81E-47 | 5.13E-43   | 1     | 1     |
| FCGRT      | 2 | -0.3165244 | 1.23E-12 | 2.25E-08   | 0.48  | 0.678 |
| TMED10     | 2 | -0.3166642 | 3.98E-16 | 7.26E-12   | 0.828 | 0.941 |
| EIF3F      | 2 | -0.3169261 | 3.18E-16 | 5.80E-12   | 0.726 | 0.89  |
| BBX        | 2 | -0.3173231 | 2.06E-19 | 3.76E-15   | 0.219 | 0.508 |
| MSRB1      | 2 | -0.3182054 | 8.83E-23 | 1.61E-18   | 0.136 | 0.441 |
| ATP5D      | 2 | -0.3189672 | 2.24E-17 | 4.09E-13   | 0.81  | 0.949 |
| MATN4      | 2 | -0.3192117 | 1.98E-11 | 3.61E-07   | 0.136 | 0.328 |
| DCN        | 2 | -0.3196303 | 1.18E-18 | 2.16E-14   | 1     | 1     |
| PPT1       | 2 | -0.3197284 | 4.19E-15 | 7.65E-11   | 0.271 | 0.525 |
| RPL35A     | 2 | -0.3205264 | 5.20E-51 | 9.49E-47   | 1     | 1     |
| CHID1      | 2 | -0.320535  | 3.57E-13 | 6.52E-09   | 0.486 | 0.689 |
| RPS24      | 2 | -0.3212492 | 2.49E-37 | 4.55E-33   | 1     | 1     |
| ARL2BP     | 2 | -0.321465  | 1.64E-14 | 2.99E-10   | 0.369 | 0.613 |
| LGALS1     | 2 | -0.3227031 | 3.57E-13 | 6.52E-09   | 0.964 | 0.983 |
| RPS27      | 2 | -0.3236711 | 5.77E-49 | 1.05E-44   | 1     | 1     |
| MZT2B      | 2 | -0.324005  | 3.33E-24 | 6.08E-20   | 0.912 | 0.983 |
| RGS10      | 2 | -0.3259212 | 1.65E-13 | 3.01E-09   | 0.446 | 0.664 |
| PPA1       | 2 | -0.3260437 | 1.59E-19 | 2.89E-15   | 0.29  | 0.593 |
| HOXB8      | 2 | -0.3263158 | 3.30E-25 | 6.03E-21   | 0.068 | 0.359 |
| DNM3OS     | 2 | -0.3280512 | 4.01E-16 | 7.32E-12   | 0.222 | 0.489 |
| RPL22      | 2 | -0.3288171 | 2.65E-40 | 4.84E-36   | 1     | 1     |
| PLA2G16    | 2 | -0.3289108 | 1.40E-16 | 2.56E-12   | 0.256 | 0.52  |
| EBPL       | 2 | -0.3289851 | 2.94E-18 | 5.37E-14   | 0.317 | 0.605 |
| CPE        | 2 | -0.3296887 | 5.38E-16 | 9.82E-12   | 0.563 | 0.794 |
| ATP5L      | 2 | -0.3317721 | 4.90E-22 | 8.94E-18   | 0.928 | 0.975 |
| EDF1       | 2 | -0.332108  | 2.91E-27 | 5.32E-23   | 0.955 | 0.98  |
| MPP6       | 2 | -0.3359572 | 1.32E-20 | 2.41E-16   | 0.161 | 0.449 |
| EIF2A      | 2 | -0.3381655 | 1.14E-13 | 2.07E-09   | 0.64  | 0.802 |
| PDIA3      | 2 | -0.3384233 | 3.24E-13 | 5.91E-09   | 0.477 | 0.698 |
| AC005152.3 | 2 | -0.3386107 | 3.05E-21 | 5.57E-17   | 0.059 | 0.308 |
| LPP        | 2 | -0.3417434 | 2.25E-10 | 4.11E-06   | 0.344 | 0.54  |
| ID4        | 2 | -0.3423529 | 4.20E-14 | 7.66E-10   | 0.419 | 0.684 |
| CUTA       | 2 | -0.3430181 | 5.44E-16 | 9.93E-12   | 0.753 | 0.91  |
| AP2M1      | 2 | -0.343292  | 6.56E-16 | 1.20E-11   | 0.4   | 0.647 |
| EIF3K      | 2 | -0.3442378 | 3.30E-19 | 6.03E-15   | 0.796 | 0.918 |
| CXXC5      | 2 | -0.3467536 | 8.77E-19 | 1.60E-14   | 0.181 | 0.466 |
| SLPI       | 2 | -0.3485181 | 1.32E-08 | 0.00024067 | 0.98  | 0.994 |

|            |   |            |          |            |       |       |
|------------|---|------------|----------|------------|-------|-------|
| MT-ND5     | 2 | -0.3486361 | 1.04E-08 | 0.00019014 | 0.525 | 0.658 |
| ATP5A1     | 2 | -0.3501992 | 2.32E-17 | 4.23E-13   | 0.385 | 0.641 |
| PDE4DIP    | 2 | -0.3503137 | 4.24E-17 | 7.74E-13   | 0.265 | 0.534 |
| RPL13      | 2 | -0.3504189 | 4.77E-64 | 8.70E-60   | 1     | 1     |
| CST3       | 2 | -0.3509774 | 1.38E-16 | 2.52E-12   | 0.998 | 0.997 |
| INSIG1     | 2 | -0.3538201 | 8.38E-15 | 1.53E-10   | 0.281 | 0.542 |
| ATP5O      | 2 | -0.3552124 | 3.11E-19 | 5.68E-15   | 0.715 | 0.901 |
| EIF3D      | 2 | -0.3578298 | 4.90E-17 | 8.94E-13   | 0.661 | 0.847 |
| DBP        | 2 | -0.3591222 | 3.69E-20 | 6.73E-16   | 0.21  | 0.506 |
| BSG        | 2 | -0.3596834 | 7.98E-18 | 1.46E-13   | 0.557 | 0.794 |
| UQCRH      | 2 | -0.3598136 | 4.75E-27 | 8.67E-23   | 0.923 | 0.992 |
| LDHB       | 2 | -0.3600377 | 8.15E-18 | 1.49E-13   | 0.665 | 0.856 |
| AC003090.1 | 2 | -0.36036   | 3.91E-24 | 7.13E-20   | 0.106 | 0.407 |
| S100A1     | 2 | -0.3607891 | 2.80E-24 | 5.11E-20   | 0.995 | 1     |
| NPM1       | 2 | -0.3618148 | 1.28E-20 | 2.34E-16   | 1     | 1     |
| SDF4       | 2 | -0.362072  | 7.53E-19 | 1.37E-14   | 0.543 | 0.78  |
| RPL37A     | 2 | -0.3630442 | 1.82E-65 | 3.32E-61   | 1     | 1     |
| RPL29      | 2 | -0.3649735 | 4.31E-52 | 7.86E-48   | 1     | 1     |
| RPL39      | 2 | -0.3658353 | 1.45E-50 | 2.64E-46   | 1     | 1     |
| PLPP1      | 2 | -0.3670881 | 2.94E-18 | 5.37E-14   | 0.124 | 0.373 |
| RPS23      | 2 | -0.3690706 | 2.75E-61 | 5.02E-57   | 1     | 1     |
| RPL18A     | 2 | -0.3702739 | 2.05E-58 | 3.74E-54   | 1     | 1     |
| TUBB       | 2 | -0.370654  | 2.70E-14 | 4.92E-10   | 0.688 | 0.847 |
| SPTLC3     | 2 | -0.3708378 | 4.23E-16 | 7.72E-12   | 0.104 | 0.328 |
| RPL21      | 2 | -0.3736463 | 5.52E-72 | 1.01E-67   | 1     | 1     |
| RPL19      | 2 | -0.3740841 | 1.83E-67 | 3.35E-63   | 1     | 1     |
| EID1       | 2 | -0.379574  | 8.02E-31 | 1.46E-26   | 0.932 | 0.986 |
| CYBRD1     | 2 | -0.3816885 | 5.36E-20 | 9.77E-16   | 0.421 | 0.698 |
| COL5A2     | 2 | -0.3817266 | 1.84E-13 | 3.36E-09   | 0.208 | 0.432 |
| TXNIP      | 2 | -0.3822761 | 1.92E-30 | 3.51E-26   | 0.052 | 0.373 |
| TOMM7      | 2 | -0.3835564 | 1.26E-54 | 2.30E-50   | 1     | 1     |
| S100A4     | 2 | -0.3848396 | 5.30E-09 | 9.67E-05   | 0.749 | 0.879 |
| RPL31      | 2 | -0.3850906 | 1.14E-57 | 2.08E-53   | 1     | 1     |
| RPL8       | 2 | -0.3855593 | 1.31E-67 | 2.39E-63   | 1     | 1     |
| TTC3       | 2 | -0.3859372 | 6.36E-19 | 1.16E-14   | 0.595 | 0.833 |
| MYL6       | 2 | -0.3874652 | 5.29E-27 | 9.65E-23   | 0.896 | 0.972 |
| BTF3       | 2 | -0.3884256 | 4.05E-38 | 7.38E-34   | 0.986 | 0.997 |
| PEBP1      | 2 | -0.3892505 | 2.45E-24 | 4.47E-20   | 0.744 | 0.946 |
| NKX3-2     | 2 | -0.3895507 | 9.25E-21 | 1.69E-16   | 0.068 | 0.316 |

|          |   |            |          |          |       |       |
|----------|---|------------|----------|----------|-------|-------|
| GREM1    | 2 | -0.3920467 | 7.86E-13 | 1.43E-08 | 0.041 | 0.198 |
| RPL37    | 2 | -0.3939183 | 4.45E-62 | 8.12E-58 | 1     | 1     |
| OXA1L    | 2 | -0.3948558 | 4.54E-19 | 8.28E-15 | 0.38  | 0.644 |
| HOXC10   | 2 | -0.3953097 | 8.46E-21 | 1.54E-16 | 0.577 | 0.816 |
| ENPP1    | 2 | -0.3955718 | 9.58E-24 | 1.75E-19 | 0.17  | 0.5   |
| UBA52    | 2 | -0.3955871 | 7.01E-59 | 1.28E-54 | 1     | 1     |
| ATP5G2   | 2 | -0.3966398 | 5.54E-34 | 1.01E-29 | 0.995 | 1     |
| PRUNE2   | 2 | -0.3972473 | 2.29E-19 | 4.18E-15 | 0.24  | 0.528 |
| FMOD     | 2 | -0.3979643 | 1.52E-25 | 2.77E-21 | 0.923 | 0.992 |
| COL11A1  | 2 | -0.3988034 | 2.05E-13 | 3.73E-09 | 0.706 | 0.89  |
| RPS18    | 2 | -0.3993299 | 1.21E-64 | 2.22E-60 | 1     | 1     |
| TPM1     | 2 | -0.4003689 | 1.01E-11 | 1.85E-07 | 0.403 | 0.605 |
| RPS5     | 2 | -0.4009336 | 2.56E-59 | 4.67E-55 | 1     | 1     |
| TSPO     | 2 | -0.402345  | 3.57E-24 | 6.51E-20 | 0.71  | 0.921 |
| HSP90AB1 | 2 | -0.4024133 | 8.12E-23 | 1.48E-18 | 0.93  | 0.983 |
| RPLP1    | 2 | -0.406064  | 2.05E-73 | 3.75E-69 | 1     | 1     |
| RPS7     | 2 | -0.4070071 | 3.27E-58 | 5.97E-54 | 1     | 1     |
| RPS13    | 2 | -0.4072381 | 1.25E-62 | 2.29E-58 | 1     | 1     |
| RPL10    | 2 | -0.4093129 | 5.12E-75 | 9.35E-71 | 1     | 1     |
| PTMS     | 2 | -0.4102561 | 2.73E-23 | 4.99E-19 | 0.52  | 0.828 |
| RPL3     | 2 | -0.4114066 | 4.05E-66 | 7.39E-62 | 1     | 1     |
| YBX1     | 2 | -0.4153008 | 1.57E-37 | 2.86E-33 | 0.959 | 0.989 |
| NGFRAP1  | 2 | -0.4169068 | 3.49E-26 | 6.38E-22 | 0.837 | 0.966 |
| NFIA     | 2 | -0.4173217 | 1.35E-27 | 2.46E-23 | 0.206 | 0.568 |
| PSMA7    | 2 | -0.4200361 | 5.76E-23 | 1.05E-18 | 0.747 | 0.927 |
| GNAS     | 2 | -0.420732  | 2.67E-24 | 4.87E-20 | 0.457 | 0.746 |
| GSTP1    | 2 | -0.4217166 | 2.30E-26 | 4.20E-22 | 0.912 | 0.986 |
| MIA      | 2 | -0.4219258 | 2.00E-14 | 3.64E-10 | 0.975 | 0.992 |
| RPL9     | 2 | -0.423629  | 4.70E-74 | 8.58E-70 | 1     | 1     |
| ERGIC3   | 2 | -0.4242247 | 1.71E-26 | 3.13E-22 | 0.695 | 0.924 |
| SLC44A1  | 2 | -0.4244105 | 9.48E-28 | 1.73E-23 | 0.163 | 0.508 |
| RBP4     | 2 | -0.425874  | 1.66E-22 | 3.04E-18 | 0.722 | 0.921 |
| SPINT2   | 2 | -0.4281782 | 4.09E-22 | 7.46E-18 | 0.251 | 0.559 |
| RPS27A   | 2 | -0.4311873 | 3.75E-79 | 6.85E-75 | 1     | 1     |
| RPL27    | 2 | -0.4403419 | 1.55E-53 | 2.83E-49 | 1     | 1     |
| TUBB2B   | 2 | -0.4409435 | 3.06E-17 | 5.59E-13 | 0.283 | 0.551 |
| ACAN     | 2 | -0.4418578 | 2.92E-28 | 5.32E-24 | 0.946 | 0.997 |
| INHBA    | 2 | -0.4420364 | 1.58E-17 | 2.88E-13 | 0.251 | 0.54  |
| PPIA     | 2 | -0.4421834 | 2.71E-35 | 4.94E-31 | 0.948 | 0.986 |

|          |   |            |          |          |       |       |
|----------|---|------------|----------|----------|-------|-------|
| RPL14    | 2 | -0.4421929 | 3.73E-63 | 6.80E-59 | 1     | 1     |
| FBXO2    | 2 | -0.4422033 | 1.14E-27 | 2.08E-23 | 0.692 | 0.921 |
| RPL13A   | 2 | -0.4458935 | 2.68E-85 | 4.88E-81 | 1     | 1     |
| SSPN     | 2 | -0.4462488 | 7.45E-30 | 1.36E-25 | 0.192 | 0.562 |
| NAP1L1   | 2 | -0.4463692 | 1.45E-32 | 2.64E-28 | 0.91  | 0.997 |
| NNMT     | 2 | -0.453459  | 1.84E-22 | 3.36E-18 | 0.916 | 0.975 |
| HINT1    | 2 | -0.4543391 | 5.06E-40 | 9.23E-36 | 0.959 | 0.997 |
| CTSC     | 2 | -0.4553897 | 1.98E-16 | 3.61E-12 | 0.133 | 0.373 |
| RPS2     | 2 | -0.4557097 | 3.25E-78 | 5.93E-74 | 1     | 1     |
| HLA-B    | 2 | -0.4609523 | 3.90E-23 | 7.12E-19 | 0.724 | 0.912 |
| HDLBP    | 2 | -0.4612759 | 1.83E-24 | 3.34E-20 | 0.351 | 0.647 |
| BGN      | 2 | -0.4631184 | 1.70E-26 | 3.10E-22 | 0.977 | 1     |
| RABAC1   | 2 | -0.4655617 | 6.61E-32 | 1.21E-27 | 0.683 | 0.932 |
| ID1      | 2 | -0.466818  | 1.30E-12 | 2.36E-08 | 0.491 | 0.743 |
| PPIC     | 2 | -0.4676223 | 1.75E-20 | 3.19E-16 | 0.269 | 0.565 |
| HNRNPA1  | 2 | -0.4679197 | 7.00E-43 | 1.28E-38 | 0.989 | 0.997 |
| RPSA     | 2 | -0.4695821 | 2.09E-55 | 3.81E-51 | 1     | 1     |
| PTRF     | 2 | -0.4697367 | 1.28E-24 | 2.33E-20 | 0.357 | 0.655 |
| NDUFA11  | 2 | -0.4702763 | 2.13E-34 | 3.89E-30 | 0.774 | 0.949 |
| RPL30    | 2 | -0.4728611 | 7.16E-80 | 1.31E-75 | 1     | 1     |
| MOXD1    | 2 | -0.4730959 | 1.13E-33 | 2.06E-29 | 0.081 | 0.438 |
| ID3      | 2 | -0.4731512 | 6.15E-22 | 1.12E-17 | 0.414 | 0.771 |
| FHL1     | 2 | -0.475316  | 8.30E-21 | 1.51E-16 | 0.283 | 0.571 |
| SSR4     | 2 | -0.4758708 | 1.25E-32 | 2.28E-28 | 0.95  | 0.989 |
| RHOBTB3  | 2 | -0.4773597 | 1.59E-22 | 2.89E-18 | 0.527 | 0.811 |
| ATRNL1   | 2 | -0.4783258 | 4.46E-37 | 8.13E-33 | 0.115 | 0.523 |
| ZBTB20   | 2 | -0.479106  | 1.65E-30 | 3.01E-26 | 0.215 | 0.579 |
| SLC25A3  | 2 | -0.480824  | 2.55E-35 | 4.65E-31 | 0.808 | 0.972 |
| PCBP2    | 2 | -0.482241  | 2.84E-39 | 5.18E-35 | 0.878 | 0.98  |
| RPL23    | 2 | -0.4870696 | 3.17E-59 | 5.79E-55 | 0.998 | 1     |
| HIST1H4C | 2 | -0.4900123 | 1.81E-23 | 3.29E-19 | 0.333 | 0.636 |
| UQCRB    | 2 | -0.4900319 | 3.45E-42 | 6.30E-38 | 0.975 | 1     |
| CP       | 2 | -0.4903933 | 6.91E-31 | 1.26E-26 | 0.658 | 0.963 |
| CD99     | 2 | -0.4905576 | 2.35E-37 | 4.29E-33 | 0.912 | 0.994 |
| RPS29    | 2 | -0.4910719 | 6.36E-83 | 1.16E-78 | 1     | 1     |
| ITM2C    | 2 | -0.4967916 | 2.72E-23 | 4.97E-19 | 0.439 | 0.743 |
| SSR3     | 2 | -0.4985619 | 3.15E-31 | 5.75E-27 | 0.817 | 0.96  |
| RPL34    | 2 | -0.503879  | 5.09E-87 | 9.28E-83 | 1     | 1     |
| RPL23A   | 2 | -0.5057831 | 1.90E-90 | 3.48E-86 | 1     | 1     |

|          |   |            |          |          |       |       |
|----------|---|------------|----------|----------|-------|-------|
| PABPC1   | 2 | -0.5067085 | 3.07E-39 | 5.61E-35 | 0.846 | 0.977 |
| GAS6     | 2 | -0.5080544 | 5.86E-25 | 1.07E-20 | 0.285 | 0.599 |
| CRIP2    | 2 | -0.5128834 | 3.07E-34 | 5.59E-30 | 0.217 | 0.605 |
| RPS3A    | 2 | -0.5149408 | 3.71E-93 | 6.77E-89 | 1     | 1     |
| HLA-A    | 2 | -0.520091  | 3.95E-30 | 7.20E-26 | 0.851 | 0.986 |
| PDIA6    | 2 | -0.5209554 | 4.37E-27 | 7.97E-23 | 0.511 | 0.805 |
| SSR2     | 2 | -0.5209946 | 2.72E-39 | 4.97E-35 | 0.706 | 0.946 |
| CYR61    | 2 | -0.5221692 | 8.20E-16 | 1.50E-11 | 0.294 | 0.545 |
| EIF4B    | 2 | -0.5253864 | 2.68E-31 | 4.89E-27 | 0.715 | 0.921 |
| CITED2   | 2 | -0.528145  | 1.13E-21 | 2.07E-17 | 0.26  | 0.562 |
| GPX3     | 2 | -0.5284901 | 1.22E-30 | 2.23E-26 | 0.93  | 0.986 |
| PLAC9    | 2 | -0.5306895 | 1.21E-28 | 2.20E-24 | 0.796 | 0.966 |
| CCDC102B | 2 | -0.5312942 | 1.53E-47 | 2.79E-43 | 0.036 | 0.466 |
| RPLP2    | 2 | -0.5328527 | 1.03E-92 | 1.88E-88 | 1     | 1     |
| CHRD12   | 2 | -0.5365063 | 3.11E-21 | 5.68E-17 | 0.152 | 0.441 |
| RPS17    | 2 | -0.5371477 | 3.26E-85 | 5.95E-81 | 1     | 1     |
| MGP      | 2 | -0.5408321 | 4.97E-30 | 9.07E-26 | 1     | 1     |
| MAGED1   | 2 | -0.549815  | 1.34E-21 | 2.44E-17 | 0.115 | 0.395 |
| EEF1B2   | 2 | -0.5505498 | 5.68E-55 | 1.04E-50 | 0.975 | 0.997 |
| ARHGAP29 | 2 | -0.5512934 | 1.13E-26 | 2.06E-22 | 0.285 | 0.616 |
| RPL7     | 2 | -0.5522325 | 1.35E-74 | 2.45E-70 | 1     | 1     |
| TPT1     | 2 | -0.5549318 | 1.40E-85 | 2.56E-81 | 1     | 1     |
| RPS16    | 2 | -0.5573653 | 3.52E-90 | 6.43E-86 | 1     | 1     |
| MT-ND4   | 2 | -0.5641868 | 1.19E-24 | 2.18E-20 | 0.966 | 0.955 |
| HLA-C    | 2 | -0.5694753 | 9.49E-37 | 1.73E-32 | 0.835 | 0.977 |
| RPL18    | 2 | -0.5746862 | 8.99E-90 | 1.64E-85 | 1     | 1     |
| EIF3L    | 2 | -0.5808319 | 3.20E-43 | 5.84E-39 | 0.76  | 0.966 |
| P4HB     | 2 | -0.5852912 | 3.11E-34 | 5.67E-30 | 0.729 | 0.941 |
| TCF4     | 2 | -0.5940778 | 1.85E-33 | 3.38E-29 | 0.29  | 0.667 |
| COL9A3   | 2 | -0.5970247 | 4.77E-23 | 8.71E-19 | 0.59  | 0.816 |
| ITM2A    | 2 | -0.5975989 | 1.49E-30 | 2.72E-26 | 0.419 | 0.74  |
| SEC11A   | 2 | -0.5998653 | 3.68E-51 | 6.72E-47 | 0.733 | 0.96  |
| SLC14A1  | 2 | -0.6102209 | 1.16E-39 | 2.12E-35 | 0.208 | 0.636 |
| NPC2     | 2 | -0.6174461 | 4.58E-65 | 8.35E-61 | 0.968 | 0.997 |
| H3F3A    | 2 | -0.6252803 | 2.91E-58 | 5.31E-54 | 0.9   | 1     |
| RPL10A   | 2 | -0.6276631 | 4.25E-87 | 7.76E-83 | 1     | 1     |
| SERPINA5 | 2 | -0.627929  | 5.01E-35 | 9.14E-31 | 0.448 | 0.76  |
| HIST1H1C | 2 | -0.6328573 | 2.95E-18 | 5.38E-14 | 0.233 | 0.486 |
| CCNI     | 2 | -0.6350908 | 2.37E-67 | 4.33E-63 | 0.977 | 1     |

|          |   |            |           |           |       |       |
|----------|---|------------|-----------|-----------|-------|-------|
| YBX3     | 2 | -0.6358947 | 4.00E-52  | 7.30E-48  | 0.762 | 0.98  |
| VIM      | 2 | -0.6520509 | 1.96E-48  | 3.57E-44  | 1     | 1     |
| RPL4     | 2 | -0.6597815 | 2.06E-83  | 3.76E-79  | 0.998 | 1     |
| RPS8     | 2 | -0.6739271 | 2.06E-106 | 3.75E-102 | 1     | 1     |
| CD9      | 2 | -0.679401  | 1.68E-40  | 3.07E-36  | 0.353 | 0.754 |
| THY1     | 2 | -0.6798461 | 1.37E-35  | 2.50E-31  | 0.152 | 0.54  |
| MT-ND1   | 2 | -0.68063   | 3.91E-34  | 7.13E-30  | 0.563 | 0.876 |
| LECT1    | 2 | -0.6840437 | 6.62E-26  | 1.21E-21  | 0.86  | 0.952 |
| EEF1A1   | 2 | -0.685956  | 1.54E-102 | 2.82E-98  | 1     | 1     |
| EEF2     | 2 | -0.6868858 | 8.18E-57  | 1.49E-52  | 0.98  | 1     |
| ISLR     | 2 | -0.7267498 | 2.40E-47  | 4.37E-43  | 0.303 | 0.751 |
| XAGE2    | 2 | -0.7283743 | 1.06E-23  | 1.94E-19  | 0.014 | 0.24  |
| RPLP0    | 2 | -0.7624503 | 1.30E-106 | 2.37E-102 | 1     | 1     |
| CTGF     | 2 | -0.7936555 | 5.72E-33  | 1.04E-28  | 0.244 | 0.641 |
| MT-CO3   | 2 | -0.8045678 | 5.55E-39  | 1.01E-34  | 0.873 | 0.941 |
| NEAT1    | 2 | -0.8076964 | 5.04E-60  | 9.20E-56  | 0.977 | 1     |
| MT-CO2   | 2 | -0.8158382 | 3.52E-39  | 6.42E-35  | 0.946 | 0.966 |
| MT-ATP6  | 2 | -0.8191801 | 2.94E-38  | 5.36E-34  | 0.794 | 0.91  |
| TSC22D1  | 2 | -0.8227657 | 4.26E-29  | 7.78E-25  | 0.647 | 0.91  |
| ACTG1    | 2 | -0.8230521 | 2.42E-57  | 4.41E-53  | 0.876 | 0.989 |
| CRTAP    | 2 | -0.8405446 | 3.80E-72  | 6.94E-68  | 0.471 | 0.91  |
| PAX1     | 2 | -0.846734  | 1.08E-64  | 1.98E-60  | 0.529 | 0.963 |
| APOD     | 2 | -0.8506216 | 9.28E-34  | 1.69E-29  | 0.206 | 0.573 |
| SLC40A1  | 2 | -0.8553132 | 6.22E-58  | 1.13E-53  | 0.072 | 0.588 |
| MT-CO1   | 2 | -0.8625966 | 4.54E-39  | 8.28E-35  | 0.968 | 0.972 |
| EIF3H    | 2 | -0.8713126 | 1.16E-90  | 2.12E-86  | 0.95  | 0.997 |
| B2M      | 2 | -0.8744569 | 2.02E-86  | 3.68E-82  | 0.977 | 1     |
| MT-ND2   | 2 | -0.8840604 | 3.27E-39  | 5.96E-35  | 0.6   | 0.862 |
| FTH1     | 2 | -0.8977603 | 1.52E-84  | 2.77E-80  | 1     | 1     |
| C2orf82  | 2 | -0.9464014 | 1.83E-50  | 3.34E-46  | 0.957 | 1     |
| MT-CYB   | 2 | -0.9618583 | 2.92E-47  | 5.32E-43  | 0.593 | 0.893 |
| CRISPLD1 | 2 | -0.9712115 | 8.17E-52  | 1.49E-47  | 0.063 | 0.531 |
| RPS20    | 2 | -0.9887685 | 1.40E-118 | 2.55E-114 | 0.995 | 1     |
| CAPS     | 2 | -1.0121777 | 9.03E-64  | 1.65E-59  | 0.624 | 0.963 |
| ZFP36L2  | 2 | -1.0171251 | 6.61E-55  | 1.21E-50  | 0.133 | 0.641 |
| RPS11    | 2 | -1.018521  | 3.72E-118 | 6.79E-114 | 0.986 | 1     |
| MT-ND3   | 2 | -1.0186145 | 4.36E-56  | 7.96E-52  | 0.6   | 0.91  |
| SPARC    | 2 | -1.0457017 | 1.84E-59  | 3.36E-55  | 0.269 | 0.802 |
| COL2A1   | 2 | -1.1307089 | 2.12E-47  | 3.87E-43  | 0.541 | 0.941 |



|             |                |                  |              |                  |              |              |
|-------------|----------------|------------------|--------------|------------------|--------------|--------------|
| ADIRF       | 2              | -1.2586168       | 1.33E-72     | 2.42E-68         | 0.276        | 0.847        |
| OGN         | 2              | -1.3108085       | 1.19E-66     | 2.18E-62         | 0.894        | 1            |
| CLEC3A      | 2              | -1.3293304       | 1.07E-75     | 1.95E-71         | 0.355        | 0.907        |
| SPTSSB      | 2              | -1.5210974       | 1.45E-92     | 2.65E-88         | 0.014        | 0.706        |
| MSMP        | 2              | -1.5309741       | 4.97E-14     | 9.06E-10         | 0.124        | 0.339        |
| FRZB        | 2              | -1.9474534       | 2.93E-65     | 5.35E-61         | 0.283        | 0.816        |
| <b>gene</b> | <b>cluster</b> | <b>avg_logFC</b> | <b>p_val</b> | <b>p_val_adj</b> | <b>pct.1</b> | <b>pct.2</b> |
| PRG4        | 3              | 1.65854155       | 8.41E-34     | 1.54E-29         | 0.537        | 0.066        |
| SPP1        | 3              | 1.56672108       | 1.12E-45     | 2.04E-41         | 0.779        | 0.172        |
| CCL20       | 3              | 1.48994485       | 9.45E-11     | 1.72E-06         | 0.192        | 0.02         |
| PTGS2       | 3              | 1.14541394       | 3.52E-48     | 6.43E-44         | 0.694        | 0.102        |
| PLA2G2A     | 3              | 1.14267119       | 6.03E-31     | 1.10E-26         | 0.678        | 0.188        |
| VEGFA       | 3              | 1.111942         | 1.38E-50     | 2.51E-46         | 0.876        | 0.387        |
| IGFBP3      | 3              | 1.07109267       | 5.43E-28     | 9.90E-24         | 0.492        | 0.082        |
| G0S2        | 3              | 1.06604824       | 1.07E-15     | 1.94E-11         | 0.707        | 0.422        |
| UPP1        | 3              | 1.04587567       | 6.56E-39     | 1.20E-34         | 0.691        | 0.199        |
| CCDC85B     | 3              | 0.97010448       | 8.18E-33     | 1.49E-28         | 0.948        | 0.797        |
| CTSL        | 3              | 0.94295722       | 2.87E-16     | 5.25E-12         | 0.795        | 0.613        |
| S100A2      | 3              | 0.93099374       | 5.42E-18     | 9.89E-14         | 0.678        | 0.398        |
| COMP        | 3              | 0.91913017       | 1.99E-26     | 3.63E-22         | 0.948        | 0.785        |
| BMP2        | 3              | 0.91224934       | 3.33E-37     | 6.08E-33         | 0.645        | 0.105        |
| ERO1A       | 3              | 0.84214077       | 4.63E-30     | 8.44E-26         | 0.752        | 0.434        |
| STK17A      | 3              | 0.80037181       | 2.88E-27     | 5.26E-23         | 0.593        | 0.188        |
| TREM1       | 3              | 0.78341059       | 1.05E-40     | 1.92E-36         | 0.554        | 0.023        |
| PHLDA1      | 3              | 0.78053785       | 3.49E-23     | 6.37E-19         | 0.56         | 0.16         |
| TNFRSF12A   | 3              | 0.75550632       | 8.67E-15     | 1.58E-10         | 0.55         | 0.289        |
| CHI3L2      | 3              | 0.74544145       | 9.75E-21     | 1.78E-16         | 0.964        | 0.766        |
| FOSL1       | 3              | 0.73605824       | 4.37E-27     | 7.98E-23         | 0.482        | 0.074        |
| TNFAIP6     | 3              | 0.72323511       | 1.80E-18     | 3.29E-14         | 0.306        | 0.023        |
| HILPDA      | 3              | 0.69364207       | 9.88E-22     | 1.80E-17         | 0.72         | 0.383        |
| MRPS6       | 3              | 0.69154789       | 7.40E-16     | 1.35E-11         | 0.977        | 0.93         |
| TGFBI       | 3              | 0.6779144        | 9.65E-26     | 1.76E-21         | 0.58         | 0.176        |
| IGFBP5      | 3              | 0.67536473       | 6.15E-14     | 1.12E-09         | 0.358        | 0.098        |
| PPP3CA      | 3              | 0.66490942       | 9.81E-20     | 1.79E-15         | 0.922        | 0.691        |
| MT1X        | 3              | 0.64974092       | 4.46E-20     | 8.13E-16         | 1            | 1            |
| DNAJB9      | 3              | 0.64741437       | 5.97E-21     | 1.09E-16         | 0.759        | 0.465        |
| TMEM45A     | 3              | 0.64005416       | 3.72E-24     | 6.79E-20         | 0.928        | 0.688        |
| ARF6        | 3              | 0.61726649       | 9.41E-24     | 1.72E-19         | 0.792        | 0.539        |
| CTHRC1      | 3              | 0.61631094       | 6.12E-23     | 1.12E-18         | 0.466        | 0.098        |

|          |   |            |          |            |       |       |
|----------|---|------------|----------|------------|-------|-------|
| MT2A     | 3 | 0.61044927 | 1.52E-22 | 2.78E-18   | 1     | 1     |
| NRP2     | 3 | 0.57774495 | 1.82E-17 | 3.33E-13   | 0.573 | 0.258 |
| SLC2A1   | 3 | 0.56055736 | 1.85E-17 | 3.38E-13   | 0.531 | 0.211 |
| BZW1     | 3 | 0.53298308 | 9.45E-18 | 1.72E-13   | 0.808 | 0.625 |
| WTAP     | 3 | 0.53208498 | 9.49E-14 | 1.73E-09   | 0.961 | 0.84  |
| PPP1R15A | 3 | 0.50611493 | 1.95E-17 | 3.55E-13   | 0.619 | 0.305 |
| PTP4A1   | 3 | 0.49605241 | 1.95E-12 | 3.55E-08   | 0.59  | 0.348 |
| ERRFI1   | 3 | 0.48874863 | 1.70E-09 | 3.10E-05   | 0.463 | 0.246 |
| CA9      | 3 | 0.48855324 | 2.25E-14 | 4.10E-10   | 0.534 | 0.254 |
| SELK     | 3 | 0.48365018 | 2.72E-19 | 4.96E-15   | 0.945 | 0.793 |
| RNF145   | 3 | 0.47832467 | 8.98E-16 | 1.64E-11   | 0.521 | 0.227 |
| SLC25A37 | 3 | 0.4777184  | 3.34E-21 | 6.09E-17   | 0.974 | 0.789 |
| HMGA2    | 3 | 0.47468667 | 3.91E-27 | 7.13E-23   | 0.417 | 0.027 |
| ENO2     | 3 | 0.46576169 | 3.29E-14 | 6.00E-10   | 0.655 | 0.43  |
| ARF4     | 3 | 0.4470625  | 2.53E-10 | 4.62E-06   | 0.72  | 0.602 |
| FAM162A  | 3 | 0.44670604 | 1.58E-16 | 2.88E-12   | 0.958 | 0.793 |
| SLC39A8  | 3 | 0.44148132 | 1.63E-15 | 2.97E-11   | 0.648 | 0.359 |
| C15orf48 | 3 | 0.43799751 | 4.24E-11 | 7.74E-07   | 0.511 | 0.23  |
| HLA-DRB1 | 3 | 0.43736891 | 3.24E-12 | 5.90E-08   | 0.534 | 0.297 |
| HMGA1    | 3 | 0.43503989 | 1.24E-06 | 0.02254533 | 0.596 | 0.441 |
| XBP1     | 3 | 0.42918373 | 5.34E-13 | 9.75E-09   | 0.743 | 0.531 |
| BHLHE40  | 3 | 0.42542602 | 3.00E-08 | 0.00054654 | 0.609 | 0.414 |
| TNFSF11  | 3 | 0.41733789 | 2.96E-19 | 5.40E-15   | 0.27  | 0     |
| PTGES3   | 3 | 0.4166747  | 3.91E-22 | 7.13E-18   | 0.974 | 0.891 |
| NDRG1    | 3 | 0.4134271  | 1.14E-12 | 2.08E-08   | 0.762 | 0.535 |
| WDR45B   | 3 | 0.41323844 | 6.61E-16 | 1.21E-11   | 0.573 | 0.262 |
| PPP1CB   | 3 | 0.4100338  | 1.99E-07 | 0.00363482 | 0.844 | 0.734 |
| SGIP1    | 3 | 0.40570322 | 8.70E-20 | 1.59E-15   | 0.368 | 0.051 |
| INSIG2   | 3 | 0.40292147 | 2.47E-09 | 4.50E-05   | 0.609 | 0.422 |
| SLC5A3   | 3 | 0.40267402 | 5.90E-08 | 0.00107662 | 0.645 | 0.484 |
| RABGGTB  | 3 | 0.40220246 | 1.18E-15 | 2.16E-11   | 0.818 | 0.582 |
| PLAUR    | 3 | 0.40108174 | 1.19E-10 | 2.18E-06   | 0.528 | 0.293 |
| IL11     | 3 | 0.40002144 | 1.15E-12 | 2.10E-08   | 0.179 | 0     |
| CCND1    | 3 | 0.39526001 | 2.08E-12 | 3.79E-08   | 0.446 | 0.18  |
| SPRY2    | 3 | 0.39435152 | 1.95E-11 | 3.57E-07   | 0.332 | 0.105 |
| ISG20    | 3 | 0.39135351 | 2.30E-10 | 4.20E-06   | 0.71  | 0.543 |
| EIF4EBP1 | 3 | 0.37965693 | 1.17E-09 | 2.13E-05   | 0.599 | 0.395 |
| NAMPT    | 3 | 0.37866551 | 1.93E-12 | 3.53E-08   | 0.808 | 0.645 |
| IL32     | 3 | 0.37832434 | 1.89E-11 | 3.44E-07   | 0.498 | 0.227 |

|            |   |            |          |            |       |       |
|------------|---|------------|----------|------------|-------|-------|
| GAPDH      | 3 | 0.37276338 | 8.88E-13 | 1.62E-08   | 1     | 1     |
| DDIT4L     | 3 | 0.37003838 | 1.11E-09 | 2.02E-05   | 0.899 | 0.734 |
| PPFIBP1    | 3 | 0.36819587 | 8.88E-08 | 0.00162035 | 0.612 | 0.484 |
| EVI2A      | 3 | 0.36331913 | 1.12E-12 | 2.04E-08   | 0.43  | 0.168 |
| CLDND1     | 3 | 0.36071718 | 4.46E-13 | 8.14E-09   | 0.606 | 0.348 |
| ARPP19     | 3 | 0.3588232  | 2.81E-12 | 5.13E-08   | 0.71  | 0.492 |
| EGLN3      | 3 | 0.354519   | 3.08E-08 | 0.00056218 | 0.407 | 0.211 |
| CFD        | 3 | 0.35400944 | 6.13E-09 | 0.00011192 | 0.29  | 0.094 |
| CD44       | 3 | 0.35313729 | 4.57E-13 | 8.35E-09   | 0.974 | 0.898 |
| SMOX       | 3 | 0.35020873 | 1.08E-06 | 0.01968354 | 0.479 | 0.32  |
| GOLT1B     | 3 | 0.34168396 | 8.50E-09 | 0.00015518 | 0.502 | 0.305 |
| CLMP       | 3 | 0.33847629 | 4.65E-13 | 8.49E-09   | 0.414 | 0.145 |
| TFPI       | 3 | 0.33736892 | 8.27E-12 | 1.51E-07   | 0.345 | 0.102 |
| RNMT       | 3 | 0.33516463 | 1.54E-11 | 2.80E-07   | 0.57  | 0.312 |
| TMEM38B    | 3 | 0.33370925 | 6.29E-10 | 1.15E-05   | 0.707 | 0.52  |
| CSGALNACT2 | 3 | 0.32787655 | 2.33E-08 | 0.00042539 | 0.394 | 0.203 |
| TNFAIP8    | 3 | 0.32510673 | 1.33E-10 | 2.42E-06   | 0.342 | 0.113 |
| GBE1       | 3 | 0.32270736 | 1.20E-07 | 0.00218679 | 0.713 | 0.586 |
| RELB       | 3 | 0.32060826 | 3.55E-10 | 6.49E-06   | 0.625 | 0.391 |
| AK2        | 3 | 0.31961532 | 3.83E-09 | 6.98E-05   | 0.814 | 0.684 |
| RAB13      | 3 | 0.31935132 | 4.21E-12 | 7.68E-08   | 0.954 | 0.895 |
| NT5C3A     | 3 | 0.31929088 | 1.43E-06 | 0.02603462 | 0.394 | 0.227 |
| CDK5RAP2   | 3 | 0.31623437 | 2.60E-06 | 0.0474066  | 0.283 | 0.133 |
| C11orf31   | 3 | 0.31522901 | 6.33E-11 | 1.16E-06   | 0.805 | 0.637 |
| RAB1A      | 3 | 0.31034388 | 4.05E-09 | 7.40E-05   | 0.805 | 0.676 |
| PHLDA2     | 3 | 0.30741533 | 8.77E-10 | 1.60E-05   | 0.267 | 0.07  |
| SLC7A2     | 3 | 0.30723541 | 2.71E-06 | 0.04951181 | 0.518 | 0.336 |
| VIMP       | 3 | 0.30543577 | 1.08E-07 | 0.00197043 | 0.717 | 0.59  |
| PGK1       | 3 | 0.2997677  | 1.67E-07 | 0.00304013 | 0.958 | 0.938 |
| VAPA       | 3 | 0.29386767 | 1.66E-08 | 0.00030377 | 0.941 | 0.883 |
| C4orf48    | 3 | 0.29229373 | 2.43E-10 | 4.43E-06   | 0.42  | 0.184 |
| A4GALT     | 3 | 0.29199112 | 1.29E-09 | 2.35E-05   | 0.388 | 0.164 |
| RNF126     | 3 | 0.28792608 | 1.58E-10 | 2.89E-06   | 0.423 | 0.188 |
| SMIM15     | 3 | 0.28620037 | 1.19E-09 | 2.17E-05   | 0.537 | 0.309 |
| COX17      | 3 | 0.28526113 | 3.18E-09 | 5.79E-05   | 0.86  | 0.695 |
| SEC61G     | 3 | 0.28009616 | 2.07E-08 | 0.00037686 | 0.997 | 0.988 |
| MGST1      | 3 | 0.27626586 | 5.14E-07 | 0.00937129 | 0.476 | 0.266 |
| MIF        | 3 | 0.27534169 | 1.73E-14 | 3.15E-10   | 1     | 1     |
| PTGES      | 3 | 0.27335177 | 3.35E-11 | 6.12E-07   | 0.254 | 0.051 |

|            |   |            |          |            |       |       |
|------------|---|------------|----------|------------|-------|-------|
| BCL2A1     | 3 | 0.26891524 | 2.17E-10 | 3.96E-06   | 0.173 | 0.012 |
| CISD2      | 3 | 0.26871865 | 1.07E-07 | 0.00196118 | 0.599 | 0.426 |
| TNS1       | 3 | 0.26683656 | 4.66E-09 | 8.51E-05   | 0.319 | 0.121 |
| TMSB10     | 3 | 0.26620553 | 5.04E-07 | 0.0091955  | 0.984 | 0.988 |
| SERPINE1   | 3 | 0.26319735 | 5.51E-10 | 1.00E-05   | 0.277 | 0.074 |
| KDM7A      | 3 | 0.26136829 | 3.31E-07 | 0.00604429 | 0.316 | 0.145 |
| LTBP1      | 3 | 0.26042894 | 6.51E-13 | 1.19E-08   | 0.257 | 0.035 |
| PAIP2      | 3 | 0.25871708 | 2.71E-06 | 0.04951133 | 0.743 | 0.672 |
| TVP23B     | 3 | 0.25708078 | 7.61E-07 | 0.01388138 | 0.427 | 0.258 |
| SPHK1      | 3 | 0.25568817 | 2.98E-08 | 0.00054417 | 0.303 | 0.117 |
| VPS37A     | 3 | 0.25499691 | 4.40E-10 | 8.02E-06   | 0.384 | 0.148 |
| BNIP3      | 3 | 0.25461202 | 3.59E-07 | 0.0065549  | 1     | 0.988 |
| TRAM1      | 3 | 0.25332392 | 4.75E-07 | 0.00866311 | 0.736 | 0.652 |
| SNRNP27    | 3 | 0.25196568 | 1.52E-07 | 0.00278079 | 0.557 | 0.371 |
| UBE2I      | 3 | 0.25189684 | 1.44E-07 | 0.00263419 | 0.759 | 0.602 |
| SLC25A36   | 3 | 0.25100208 | 9.11E-07 | 0.01662222 | 0.599 | 0.422 |
| MZT2B      | 3 | -0.2509082 | 8.29E-09 | 0.00015121 | 0.915 | 0.953 |
| ATP5A1     | 3 | -0.2529876 | 1.27E-07 | 0.00232547 | 0.427 | 0.621 |
| HMGB2      | 3 | -0.2532068 | 8.84E-07 | 0.01613316 | 0.316 | 0.512 |
| RPL39      | 3 | -0.253489  | 4.73E-16 | 8.64E-12   | 1     | 1     |
| RPL12      | 3 | -0.253632  | 1.41E-17 | 2.57E-13   | 1     | 1     |
| SP5        | 3 | -0.2539152 | 4.24E-14 | 7.74E-10   | 0     | 0.172 |
| RBMX       | 3 | -0.2549095 | 7.26E-07 | 0.01324175 | 0.632 | 0.77  |
| TTC3       | 3 | -0.2550834 | 1.50E-08 | 0.00027401 | 0.567 | 0.77  |
| CTSK       | 3 | -0.2551728 | 7.19E-10 | 1.31E-05   | 0.14  | 0.355 |
| AC003090.1 | 3 | -0.2559987 | 2.39E-13 | 4.36E-09   | 0.052 | 0.273 |
| MRC2       | 3 | -0.2566333 | 1.84E-13 | 3.36E-09   | 0.085 | 0.328 |
| ZNF90      | 3 | -0.2587727 | 1.90E-07 | 0.00346735 | 0.453 | 0.633 |
| IL13RA1    | 3 | -0.258817  | 1.41E-10 | 2.58E-06   | 0.238 | 0.492 |
| CD59       | 3 | -0.259312  | 1.22E-09 | 2.23E-05   | 0.909 | 0.957 |
| ATP5D      | 3 | -0.2598011 | 5.27E-08 | 0.00096132 | 0.785 | 0.91  |
| TOMM7      | 3 | -0.260467  | 2.84E-20 | 5.18E-16   | 1     | 1     |
| RPS6       | 3 | -0.2614557 | 1.67E-24 | 3.05E-20   | 1     | 1     |
| IFI27L2    | 3 | -0.2629576 | 3.60E-09 | 6.57E-05   | 0.713 | 0.875 |
| GSTP1      | 3 | -0.2629923 | 4.31E-10 | 7.86E-06   | 0.945 | 0.973 |
| ANGPTL2    | 3 | -0.2631633 | 1.89E-06 | 0.03453298 | 0.283 | 0.445 |
| PTMA       | 3 | -0.2639632 | 8.25E-17 | 1.50E-12   | 1     | 1     |
| SLC25A5    | 3 | -0.2639635 | 1.91E-08 | 0.00034898 | 0.407 | 0.621 |
| SDF4       | 3 | -0.2643883 | 2.27E-06 | 0.04149088 | 0.58  | 0.719 |

|          |   |            |          |            |       |       |
|----------|---|------------|----------|------------|-------|-------|
| HNRNPA3  | 3 | -0.2644243 | 6.96E-07 | 0.01270759 | 0.459 | 0.621 |
| BRK1     | 3 | -0.2648323 | 3.29E-11 | 6.01E-07   | 0.811 | 0.934 |
| RPL7A    | 3 | -0.2651549 | 1.50E-20 | 2.74E-16   | 1     | 1     |
| C19orf43 | 3 | -0.2659191 | 7.17E-11 | 1.31E-06   | 0.801 | 0.953 |
| RPL31    | 3 | -0.2659881 | 1.67E-20 | 3.05E-16   | 1     | 1     |
| PARK7    | 3 | -0.2660446 | 2.65E-10 | 4.83E-06   | 0.801 | 0.926 |
| CUTA     | 3 | -0.2661324 | 6.86E-09 | 0.00012523 | 0.759 | 0.898 |
| DPYSL3   | 3 | -0.2667696 | 7.24E-11 | 1.32E-06   | 0.121 | 0.344 |
| NDUFB1   | 3 | -0.2683985 | 3.98E-11 | 7.26E-07   | 0.818 | 0.922 |
| SMIM19   | 3 | -0.2690719 | 1.78E-08 | 0.00032442 | 0.319 | 0.527 |
| EIF2A    | 3 | -0.269297  | 2.14E-07 | 0.00390854 | 0.606 | 0.77  |
| H2AFJ    | 3 | -0.2693553 | 9.31E-08 | 0.00169887 | 0.658 | 0.828 |
| SNRPE    | 3 | -0.2697581 | 7.41E-09 | 0.00013527 | 0.632 | 0.781 |
| RPS12    | 3 | -0.269866  | 1.07E-23 | 1.95E-19   | 1     | 1     |
| RPS4X    | 3 | -0.2698882 | 1.96E-22 | 3.58E-18   | 1     | 1     |
| PDE4DIP  | 3 | -0.2710598 | 1.80E-09 | 3.29E-05   | 0.208 | 0.43  |
| AP2M1    | 3 | -0.2711686 | 1.22E-08 | 0.00022291 | 0.453 | 0.656 |
| PPT1     | 3 | -0.2713478 | 6.31E-09 | 0.0001151  | 0.332 | 0.551 |
| RPL8     | 3 | -0.2718141 | 4.07E-25 | 7.43E-21   | 1     | 1     |
| CNBP     | 3 | -0.2720163 | 2.76E-09 | 5.04E-05   | 0.834 | 0.934 |
| RPL21    | 3 | -0.2723655 | 6.84E-29 | 1.25E-24   | 1     | 1     |
| SSR2     | 3 | -0.2725869 | 2.23E-08 | 0.00040628 | 0.73  | 0.871 |
| EIF3K    | 3 | -0.2733966 | 3.54E-09 | 6.46E-05   | 0.814 | 0.922 |
| RPL13    | 3 | -0.2734184 | 2.25E-26 | 4.10E-22   | 1     | 1     |
| RPS5     | 3 | -0.2734293 | 7.72E-23 | 1.41E-18   | 1     | 1     |
| BBX      | 3 | -0.27389   | 1.04E-09 | 1.90E-05   | 0.221 | 0.438 |
| PRKCSH   | 3 | -0.274875  | 4.95E-09 | 9.03E-05   | 0.218 | 0.438 |
| EDF1     | 3 | -0.2754409 | 5.25E-12 | 9.58E-08   | 0.932 | 0.977 |
| ENPP1    | 3 | -0.2762076 | 4.46E-10 | 8.14E-06   | 0.127 | 0.34  |
| ZBTB20   | 3 | -0.2769805 | 3.71E-10 | 6.77E-06   | 0.202 | 0.438 |
| WBP2     | 3 | -0.2776587 | 1.29E-06 | 0.0234616  | 0.505 | 0.633 |
| OS9      | 3 | -0.277979  | 1.47E-09 | 2.67E-05   | 0.349 | 0.594 |
| MYL12B   | 3 | -0.2788003 | 3.93E-08 | 0.00071772 | 0.485 | 0.676 |
| AHNAK    | 3 | -0.2788726 | 1.70E-09 | 3.10E-05   | 0.378 | 0.609 |
| PGAM1    | 3 | -0.2798135 | 2.80E-09 | 5.11E-05   | 0.697 | 0.855 |
| CHID1    | 3 | -0.2809253 | 4.85E-10 | 8.86E-06   | 0.352 | 0.602 |
| MTDH     | 3 | -0.2810196 | 2.66E-09 | 4.86E-05   | 0.528 | 0.742 |
| HDLBP    | 3 | -0.2813378 | 2.25E-06 | 0.04102322 | 0.371 | 0.52  |
| LTA4H    | 3 | -0.2826569 | 2.58E-09 | 4.71E-05   | 0.508 | 0.691 |

|               |   |            |          |            |       |       |
|---------------|---|------------|----------|------------|-------|-------|
| SSPN          | 3 | -0.2856253 | 2.18E-13 | 3.97E-09   | 0.134 | 0.398 |
| CYSTM1        | 3 | -0.2868328 | 1.08E-09 | 1.97E-05   | 0.469 | 0.672 |
| UBE2R2        | 3 | -0.2874771 | 3.39E-09 | 6.18E-05   | 0.358 | 0.57  |
| TCEA3         | 3 | -0.2877768 | 4.66E-12 | 8.50E-08   | 0.228 | 0.504 |
| ERGIC3        | 3 | -0.2887914 | 8.23E-10 | 1.50E-05   | 0.642 | 0.848 |
| MYLK          | 3 | -0.2888149 | 8.62E-12 | 1.57E-07   | 0.088 | 0.309 |
| ITM2C         | 3 | -0.2892118 | 1.62E-08 | 0.00029481 | 0.316 | 0.531 |
| RPL14         | 3 | -0.2896371 | 3.92E-22 | 7.14E-18   | 1     | 1     |
| DST           | 3 | -0.2898839 | 1.16E-08 | 0.0002114  | 0.375 | 0.598 |
| ARPC1A        | 3 | -0.2914514 | 2.02E-09 | 3.69E-05   | 0.404 | 0.602 |
| BSG           | 3 | -0.2918886 | 2.63E-09 | 4.81E-05   | 0.534 | 0.727 |
| CXXC5         | 3 | -0.2926019 | 1.19E-09 | 2.17E-05   | 0.15  | 0.355 |
| SEPP1         | 3 | -0.2928959 | 4.03E-10 | 7.35E-06   | 0.244 | 0.484 |
| RP11-983P16.4 | 3 | -0.2931442 | 7.78E-11 | 1.42E-06   | 0.303 | 0.547 |
| RPL37A        | 3 | -0.2935344 | 9.09E-31 | 1.66E-26   | 1     | 1     |
| ITGA10        | 3 | -0.2942892 | 3.69E-07 | 0.00672656 | 0.362 | 0.547 |
| H1FX          | 3 | -0.29439   | 8.77E-13 | 1.60E-08   | 0.124 | 0.379 |
| ATP5F1        | 3 | -0.297001  | 1.79E-09 | 3.27E-05   | 0.436 | 0.656 |
| CRISPLD1      | 3 | -0.2976993 | 2.13E-10 | 3.89E-06   | 0.029 | 0.191 |
| RPS7          | 3 | -0.2987508 | 1.69E-24 | 3.09E-20   | 1     | 1     |
| PDIA3         | 3 | -0.299655  | 8.80E-08 | 0.00160617 | 0.433 | 0.656 |
| MPP6          | 3 | -0.3000739 | 2.60E-13 | 4.74E-09   | 0.15  | 0.414 |
| KRT8          | 3 | -0.3008041 | 3.39E-09 | 6.18E-05   | 0.274 | 0.496 |
| NFIA          | 3 | -0.3012933 | 1.41E-12 | 2.57E-08   | 0.143 | 0.402 |
| LRP10         | 3 | -0.3015088 | 1.28E-09 | 2.33E-05   | 0.3   | 0.531 |
| GRN           | 3 | -0.3016296 | 4.80E-11 | 8.75E-07   | 0.212 | 0.473 |
| COL6A1        | 3 | -0.302651  | 5.10E-09 | 9.31E-05   | 0.329 | 0.543 |
| PSMA7         | 3 | -0.3030611 | 2.96E-10 | 5.41E-06   | 0.785 | 0.926 |
| RPL27         | 3 | -0.3044553 | 5.07E-23 | 9.26E-19   | 1     | 1     |
| CHMP3         | 3 | -0.3049935 | 1.74E-11 | 3.18E-07   | 0.401 | 0.648 |
| HADHA         | 3 | -0.3050067 | 2.04E-09 | 3.72E-05   | 0.303 | 0.512 |
| PRELP         | 3 | -0.3053353 | 3.33E-07 | 0.00606716 | 0.928 | 0.977 |
| TPD52L1       | 3 | -0.305338  | 2.52E-09 | 4.60E-05   | 0.3   | 0.52  |
| IGFBP6        | 3 | -0.3055659 | 8.69E-07 | 0.01585972 | 0.518 | 0.691 |
| PKM           | 3 | -0.3059126 | 1.65E-06 | 0.03002476 | 0.899 | 0.98  |
| ANXA4         | 3 | -0.3075252 | 3.36E-10 | 6.13E-06   | 0.319 | 0.551 |
| RPS18         | 3 | -0.3081521 | 4.81E-29 | 8.77E-25   | 1     | 1     |
| NBEAL1        | 3 | -0.3098649 | 3.38E-13 | 6.16E-09   | 0.984 | 0.992 |
| PIK3R1        | 3 | -0.3119155 | 7.36E-08 | 0.00134221 | 0.169 | 0.363 |

|          |   |            |          |            |       |       |
|----------|---|------------|----------|------------|-------|-------|
| RPL13A   | 3 | -0.3141491 | 2.28E-36 | 4.17E-32   | 1     | 1     |
| UQCRHL   | 3 | -0.315505  | 4.75E-12 | 8.66E-08   | 0.287 | 0.547 |
| UQCRH    | 3 | -0.3162138 | 4.74E-16 | 8.65E-12   | 0.912 | 0.988 |
| RPA3     | 3 | -0.3164712 | 2.62E-10 | 4.78E-06   | 0.43  | 0.641 |
| ANXA1    | 3 | -0.317366  | 3.29E-09 | 6.01E-05   | 0.632 | 0.844 |
| RPL19    | 3 | -0.3175765 | 5.84E-36 | 1.07E-31   | 1     | 1     |
| UBA52    | 3 | -0.3181634 | 1.75E-28 | 3.19E-24   | 1     | 1     |
| METTL7A  | 3 | -0.3184954 | 6.18E-09 | 0.00011269 | 0.094 | 0.277 |
| RPS2     | 3 | -0.3193403 | 1.66E-30 | 3.02E-26   | 1     | 1     |
| ATP5G2   | 3 | -0.3197594 | 2.81E-18 | 5.12E-14   | 0.997 | 0.992 |
| ATP5O    | 3 | -0.3199076 | 1.09E-12 | 1.99E-08   | 0.723 | 0.875 |
| COMMD6   | 3 | -0.3209632 | 2.79E-21 | 5.10E-17   | 1     | 1     |
| EIF3D    | 3 | -0.321724  | 1.76E-09 | 3.21E-05   | 0.694 | 0.828 |
| XAGE2    | 3 | -0.3232598 | 1.99E-09 | 3.64E-05   | 0.007 | 0.129 |
| CRYAB    | 3 | -0.3237435 | 6.52E-09 | 0.00011891 | 0.564 | 0.785 |
| CST3     | 3 | -0.324489  | 7.55E-11 | 1.38E-06   | 0.984 | 1     |
| GSN      | 3 | -0.3246446 | 4.69E-11 | 8.55E-07   | 0.436 | 0.664 |
| HSP90AB1 | 3 | -0.3253928 | 5.15E-13 | 9.39E-09   | 0.941 | 0.969 |
| OXA1L    | 3 | -0.3268523 | 8.20E-11 | 1.50E-06   | 0.42  | 0.633 |
| ATRNL1   | 3 | -0.3278528 | 1.52E-17 | 2.77E-13   | 0.055 | 0.328 |
| PDLIM4   | 3 | -0.3286441 | 1.97E-08 | 0.00036019 | 0.713 | 0.863 |
| PRCP     | 3 | -0.3290756 | 1.87E-15 | 3.42E-11   | 0.098 | 0.371 |
| SLC39A14 | 3 | -0.3295483 | 4.27E-11 | 7.79E-07   | 0.801 | 0.902 |
| CRIP2    | 3 | -0.3299969 | 3.06E-12 | 5.57E-08   | 0.186 | 0.441 |
| PPIC     | 3 | -0.3310477 | 1.27E-11 | 2.32E-07   | 0.153 | 0.395 |
| SCARA3   | 3 | -0.3323865 | 7.08E-12 | 1.29E-07   | 0.179 | 0.434 |
| SSR3     | 3 | -0.3327423 | 1.67E-10 | 3.04E-06   | 0.785 | 0.91  |
| EIF2S3   | 3 | -0.3331915 | 1.32E-11 | 2.41E-07   | 0.469 | 0.711 |
| TSPAN4   | 3 | -0.3335405 | 1.00E-09 | 1.83E-05   | 0.329 | 0.539 |
| RGS10    | 3 | -0.3336865 | 5.15E-13 | 9.41E-09   | 0.482 | 0.734 |
| COL11A1  | 3 | -0.3346034 | 2.46E-10 | 4.49E-06   | 0.45  | 0.703 |
| ATPIF1   | 3 | -0.3360668 | 1.00E-11 | 1.83E-07   | 0.502 | 0.766 |
| LITAF    | 3 | -0.3367191 | 9.91E-13 | 1.81E-08   | 0.404 | 0.652 |
| RPS13    | 3 | -0.3370681 | 1.03E-32 | 1.88E-28   | 1     | 1     |
| GNAS     | 3 | -0.3372688 | 8.26E-12 | 1.51E-07   | 0.456 | 0.656 |
| RPS23    | 3 | -0.3383728 | 6.38E-36 | 1.16E-31   | 1     | 1     |
| NAP1L1   | 3 | -0.3386098 | 1.05E-15 | 1.91E-11   | 0.967 | 0.977 |
| ILF3-AS1 | 3 | -0.3388083 | 1.64E-14 | 2.99E-10   | 0.205 | 0.5   |
| PRDX5    | 3 | -0.3390108 | 3.45E-16 | 6.30E-12   | 0.818 | 0.961 |

|              |   |            |          |            |       |       |
|--------------|---|------------|----------|------------|-------|-------|
| CYBRD1       | 3 | -0.3390827 | 1.21E-10 | 2.21E-06   | 0.401 | 0.629 |
| RPL10        | 3 | -0.3412254 | 1.29E-33 | 2.35E-29   | 1     | 1     |
| RPL30        | 3 | -0.3427073 | 4.93E-35 | 9.00E-31   | 1     | 1     |
| NMRK1        | 3 | -0.3430464 | 2.02E-14 | 3.68E-10   | 0.235 | 0.527 |
| PFN1         | 3 | -0.345399  | 2.27E-11 | 4.14E-07   | 0.814 | 0.941 |
| DBP          | 3 | -0.3473818 | 1.61E-16 | 2.94E-12   | 0.107 | 0.398 |
| HMGB1        | 3 | -0.347881  | 4.33E-12 | 7.91E-08   | 0.632 | 0.855 |
| LINC01503    | 3 | -0.3481185 | 5.52E-12 | 1.01E-07   | 0.179 | 0.43  |
| RPLP1        | 3 | -0.3493832 | 1.38E-39 | 2.52E-35   | 1     | 1     |
| NFIC         | 3 | -0.3500056 | 3.86E-11 | 7.04E-07   | 0.287 | 0.523 |
| ARL6IP5      | 3 | -0.3502026 | 2.90E-14 | 5.28E-10   | 0.476 | 0.789 |
| MIA          | 3 | -0.3506076 | 4.59E-07 | 0.00838199 | 0.974 | 0.965 |
| CMB9-22P13.1 | 3 | -0.352104  | 7.27E-13 | 1.33E-08   | 0.27  | 0.535 |
| SPINT2       | 3 | -0.3524459 | 4.08E-11 | 7.44E-07   | 0.231 | 0.453 |
| GAS6         | 3 | -0.3545941 | 9.74E-13 | 1.78E-08   | 0.215 | 0.488 |
| DMKN         | 3 | -0.3550523 | 5.53E-14 | 1.01E-09   | 0.27  | 0.551 |
| LUM          | 3 | -0.3552749 | 1.25E-19 | 2.27E-15   | 1     | 1     |
| PDIA6        | 3 | -0.3580995 | 8.11E-12 | 1.48E-07   | 0.427 | 0.699 |
| PCBP2        | 3 | -0.3586265 | 5.66E-16 | 1.03E-11   | 0.87  | 0.961 |
| RPS29        | 3 | -0.3595662 | 1.43E-41 | 2.62E-37   | 1     | 1     |
| ASS1         | 3 | -0.3599185 | 3.46E-12 | 6.31E-08   | 0.495 | 0.754 |
| CPE          | 3 | -0.3610112 | 2.37E-12 | 4.32E-08   | 0.57  | 0.805 |
| CTSC         | 3 | -0.3618799 | 5.09E-08 | 0.0009296  | 0.169 | 0.367 |
| KLF6         | 3 | -0.3622984 | 1.12E-10 | 2.05E-06   | 0.202 | 0.441 |
| POLR2L       | 3 | -0.3627878 | 4.27E-11 | 7.79E-07   | 0.743 | 0.863 |
| NR1D1        | 3 | -0.362823  | 2.96E-08 | 0.00054066 | 0.277 | 0.48  |
| BTF3         | 3 | -0.3641456 | 1.35E-25 | 2.46E-21   | 0.993 | 1     |
| FHL1         | 3 | -0.3684643 | 1.80E-16 | 3.29E-12   | 0.244 | 0.57  |
| DDR2         | 3 | -0.3740422 | 1.61E-12 | 2.94E-08   | 0.29  | 0.559 |
| AHNAK2       | 3 | -0.376643  | 3.71E-13 | 6.77E-09   | 0.283 | 0.566 |
| C9orf16      | 3 | -0.3809333 | 9.86E-10 | 1.80E-05   | 0.466 | 0.668 |
| SSR4         | 3 | -0.3816585 | 1.06E-12 | 1.93E-08   | 0.866 | 0.977 |
| NOVA1        | 3 | -0.3817134 | 1.94E-09 | 3.54E-05   | 0.801 | 0.918 |
| RPL9         | 3 | -0.3831885 | 3.22E-41 | 5.87E-37   | 1     | 1     |
| CD9          | 3 | -0.3841219 | 8.54E-13 | 1.56E-08   | 0.322 | 0.59  |
| PPIA         | 3 | -0.3846768 | 1.76E-18 | 3.21E-14   | 0.906 | 0.977 |
| RPL37        | 3 | -0.3866551 | 2.86E-39 | 5.22E-35   | 1     | 1     |
| RPS27A       | 3 | -0.3886282 | 5.72E-43 | 1.04E-38   | 1     | 1     |
| RPL3         | 3 | -0.3891292 | 7.14E-35 | 1.30E-30   | 1     | 1     |



|          |   |            |          |            |       |       |
|----------|---|------------|----------|------------|-------|-------|
| SLC14A1  | 3 | -0.3911711 | 5.19E-14 | 9.47E-10   | 0.163 | 0.434 |
| IGFBP7   | 3 | -0.3925199 | 8.15E-07 | 0.01487025 | 0.831 | 0.859 |
| LPP      | 3 | -0.392727  | 7.76E-12 | 1.42E-07   | 0.508 | 0.715 |
| RBP4     | 3 | -0.3938106 | 1.32E-08 | 0.00024001 | 0.648 | 0.805 |
| MALAT1   | 3 | -0.3939635 | 1.43E-13 | 2.62E-09   | 1     | 1     |
| LDHB     | 3 | -0.3951868 | 1.13E-15 | 2.06E-11   | 0.642 | 0.848 |
| FGF7     | 3 | -0.4034585 | 1.78E-11 | 3.24E-07   | 0.156 | 0.414 |
| NDUFA11  | 3 | -0.4040916 | 4.27E-17 | 7.79E-13   | 0.733 | 0.93  |
| COL9A3   | 3 | -0.4058532 | 8.17E-08 | 0.00149044 | 0.404 | 0.613 |
| RPS16    | 3 | -0.4105488 | 1.63E-42 | 2.97E-38   | 1     | 1     |
| SLC29A1  | 3 | -0.4119677 | 1.16E-14 | 2.12E-10   | 0.235 | 0.516 |
| F13A1    | 3 | -0.4131127 | 5.33E-12 | 9.73E-08   | 0.189 | 0.441 |
| RPL23A   | 3 | -0.4178442 | 1.04E-45 | 1.90E-41   | 1     | 1     |
| NUPR1    | 3 | -0.4184134 | 3.33E-13 | 6.07E-09   | 0.951 | 0.988 |
| HTRA1    | 3 | -0.4196722 | 1.18E-17 | 2.16E-13   | 0.655 | 0.918 |
| MAF      | 3 | -0.4204668 | 8.90E-14 | 1.62E-09   | 0.186 | 0.461 |
| ITM2A    | 3 | -0.4213082 | 4.04E-15 | 7.37E-11   | 0.309 | 0.617 |
| FBXO2    | 3 | -0.4225081 | 2.02E-16 | 3.68E-12   | 0.573 | 0.852 |
| YBX1     | 3 | -0.4227847 | 4.13E-28 | 7.53E-24   | 0.971 | 0.988 |
| NGFRAP1  | 3 | -0.4242684 | 1.52E-19 | 2.77E-15   | 0.691 | 0.93  |
| MYL6     | 3 | -0.4245441 | 2.94E-23 | 5.36E-19   | 0.886 | 0.984 |
| TUBB     | 3 | -0.428656  | 2.67E-15 | 4.88E-11   | 0.691 | 0.879 |
| RPL23    | 3 | -0.4302741 | 3.61E-36 | 6.58E-32   | 0.997 | 1     |
| SLC25A3  | 3 | -0.4353997 | 1.09E-22 | 1.98E-18   | 0.814 | 0.988 |
| SPON2    | 3 | -0.4372904 | 2.07E-13 | 3.78E-09   | 0.176 | 0.457 |
| S100A13  | 3 | -0.4382536 | 3.18E-27 | 5.80E-23   | 0.967 | 1     |
| TSPO     | 3 | -0.4383654 | 4.57E-17 | 8.33E-13   | 0.681 | 0.902 |
| CCDC102B | 3 | -0.4396432 | 8.42E-25 | 1.54E-20   | 0.023 | 0.352 |
| HLA-A    | 3 | -0.4407631 | 1.04E-12 | 1.90E-08   | 0.883 | 0.977 |
| RPSA     | 3 | -0.4409796 | 4.89E-31 | 8.93E-27   | 1     | 1     |
| SEC11A   | 3 | -0.4411458 | 3.94E-24 | 7.19E-20   | 0.743 | 0.949 |
| DCN      | 3 | -0.4414994 | 2.49E-24 | 4.55E-20   | 1     | 1     |
| SLC40A1  | 3 | -0.4419534 | 8.77E-16 | 1.60E-11   | 0.075 | 0.336 |
| ID3      | 3 | -0.4484649 | 3.71E-14 | 6.77E-10   | 0.287 | 0.625 |
| CITED2   | 3 | -0.4518199 | 4.59E-13 | 8.38E-09   | 0.16  | 0.414 |
| EEF1B2   | 3 | -0.4566195 | 4.03E-29 | 7.35E-25   | 0.98  | 0.992 |
| RPLP2    | 3 | -0.456727  | 3.86E-53 | 7.05E-49   | 1     | 1     |
| FXVD6    | 3 | -0.4570346 | 1.11E-20 | 2.02E-16   | 0.684 | 0.922 |
| RPL18    | 3 | -0.4671147 | 2.96E-45 | 5.40E-41   | 1     | 1     |

|          |   |            |          |          |       |       |
|----------|---|------------|----------|----------|-------|-------|
| EIF4B    | 3 | -0.4702745 | 1.29E-17 | 2.36E-13 | 0.756 | 0.883 |
| HLA-B    | 3 | -0.4704213 | 4.92E-14 | 8.98E-10 | 0.749 | 0.898 |
| PEBP1    | 3 | -0.4747215 | 1.58E-24 | 2.88E-20 | 0.658 | 0.926 |
| PTMS     | 3 | -0.4795565 | 5.32E-19 | 9.71E-15 | 0.466 | 0.797 |
| INHBA    | 3 | -0.4830769 | 1.22E-19 | 2.22E-15 | 0.156 | 0.504 |
| UQCRB    | 3 | -0.4864167 | 5.01E-26 | 9.14E-22 | 0.948 | 0.996 |
| CD99     | 3 | -0.487052  | 3.66E-26 | 6.68E-22 | 0.876 | 0.93  |
| RABAC1   | 3 | -0.4872901 | 1.40E-21 | 2.56E-17 | 0.632 | 0.879 |
| RPS17    | 3 | -0.4884654 | 1.27E-51 | 2.31E-47 | 1     | 1     |
| RPS3A    | 3 | -0.4919672 | 2.58E-52 | 4.71E-48 | 1     | 1     |
| FMOD     | 3 | -0.4923649 | 9.86E-19 | 1.80E-14 | 0.824 | 0.949 |
| RPL34    | 3 | -0.4928108 | 8.62E-48 | 1.57E-43 | 1     | 1     |
| HINT1    | 3 | -0.4939735 | 3.04E-32 | 5.55E-28 | 0.935 | 0.996 |
| EID1     | 3 | -0.4992316 | 6.75E-30 | 1.23E-25 | 0.876 | 0.988 |
| SERPINA5 | 3 | -0.500124  | 1.31E-20 | 2.38E-16 | 0.189 | 0.535 |
| HIST1H4C | 3 | -0.5055421 | 2.19E-15 | 4.00E-11 | 0.394 | 0.66  |
| MT-ND5   | 3 | -0.5069291 | 4.30E-13 | 7.85E-09 | 0.603 | 0.773 |
| RHOBTB3  | 3 | -0.5121496 | 2.40E-15 | 4.38E-11 | 0.375 | 0.68  |
| HIST1H1C | 3 | -0.5147056 | 2.18E-12 | 3.97E-08 | 0.264 | 0.512 |
| ACAN     | 3 | -0.5159284 | 7.95E-20 | 1.45E-15 | 0.857 | 0.965 |
| HSPB1    | 3 | -0.5189131 | 1.45E-21 | 2.65E-17 | 0.489 | 0.801 |
| SOD3     | 3 | -0.519496  | 1.48E-16 | 2.70E-12 | 0.967 | 0.996 |
| PSAP     | 3 | -0.5205507 | 2.40E-25 | 4.37E-21 | 0.883 | 0.977 |
| PABPC1   | 3 | -0.5227081 | 6.60E-25 | 1.21E-20 | 0.831 | 0.969 |
| TCF4     | 3 | -0.528934  | 1.48E-25 | 2.70E-21 | 0.186 | 0.602 |
| EIF3L    | 3 | -0.5324388 | 7.40E-29 | 1.35E-24 | 0.775 | 0.977 |
| THY1     | 3 | -0.5350563 | 3.85E-26 | 7.03E-22 | 0.081 | 0.465 |
| MOXD1    | 3 | -0.5453701 | 7.99E-23 | 1.46E-18 | 0.195 | 0.566 |
| CTGF     | 3 | -0.5479761 | 4.72E-17 | 8.61E-13 | 0.192 | 0.52  |
| HNRNPA1  | 3 | -0.5514958 | 2.05E-30 | 3.74E-26 | 0.971 | 1     |
| RPL7     | 3 | -0.5605293 | 2.48E-46 | 4.53E-42 | 1     | 1     |
| PTRF     | 3 | -0.5611599 | 8.51E-22 | 1.55E-17 | 0.306 | 0.648 |
| ARHGAP29 | 3 | -0.5612858 | 6.78E-20 | 1.24E-15 | 0.264 | 0.594 |
| NPC2     | 3 | -0.5719613 | 3.59E-39 | 6.54E-35 | 0.928 | 0.996 |
| CEBPD    | 3 | -0.5855643 | 1.24E-20 | 2.27E-16 | 0.814 | 0.941 |
| EIF3H    | 3 | -0.5881285 | 1.39E-36 | 2.53E-32 | 0.951 | 0.988 |
| CCNI     | 3 | -0.5900351 | 1.42E-45 | 2.60E-41 | 0.997 | 1     |
| TPT1     | 3 | -0.5959845 | 6.51E-56 | 1.19E-51 | 1     | 1     |
| CP       | 3 | -0.5980051 | 3.06E-30 | 5.58E-26 | 0.609 | 0.961 |

|         |   |            |          |          |       |       |
|---------|---|------------|----------|----------|-------|-------|
| ISLR    | 3 | -0.6064464 | 1.42E-32 | 2.59E-28 | 0.127 | 0.594 |
| BGN     | 3 | -0.6127605 | 5.65E-32 | 1.03E-27 | 0.925 | 1     |
| RPL4    | 3 | -0.6143371 | 5.68E-54 | 1.04E-49 | 1     | 1     |
| EEF2    | 3 | -0.6148909 | 6.86E-26 | 1.25E-21 | 0.99  | 0.992 |
| SPARC   | 3 | -0.6306205 | 8.99E-31 | 1.64E-26 | 0.13  | 0.582 |
| P4HB    | 3 | -0.6322406 | 4.68E-25 | 8.55E-21 | 0.537 | 0.883 |
| VIM     | 3 | -0.6369923 | 9.54E-38 | 1.74E-33 | 1     | 1     |
| HLA-C   | 3 | -0.6396752 | 8.22E-26 | 1.50E-21 | 0.795 | 0.961 |
| H3F3A   | 3 | -0.6438029 | 1.20E-40 | 2.18E-36 | 0.893 | 0.992 |
| RPS8    | 3 | -0.6509203 | 9.58E-66 | 1.75E-61 | 1     | 1     |
| GADD45A | 3 | -0.6539036 | 4.17E-15 | 7.62E-11 | 0.365 | 0.656 |
| TPM1    | 3 | -0.6541351 | 1.02E-19 | 1.87E-15 | 0.453 | 0.746 |
| FTH1    | 3 | -0.6556321 | 4.81E-20 | 8.78E-16 | 1     | 1     |
| RPL10A  | 3 | -0.6573164 | 6.69E-57 | 1.22E-52 | 1     | 1     |
| YBX3    | 3 | -0.6603149 | 2.05E-35 | 3.74E-31 | 0.668 | 0.969 |
| RPLP0   | 3 | -0.6658396 | 1.58E-61 | 2.89E-57 | 1     | 1     |
| SLPI    | 3 | -0.6679375 | 7.96E-14 | 1.45E-09 | 0.951 | 1     |
| S100A4  | 3 | -0.6695544 | 2.38E-15 | 4.35E-11 | 0.629 | 0.867 |
| PRUNE2  | 3 | -0.6779954 | 1.11E-29 | 2.02E-25 | 0.208 | 0.645 |
| EEF1A1  | 3 | -0.6787017 | 3.39E-66 | 6.18E-62 | 1     | 1     |
| MSMP    | 3 | -0.6788438 | 8.12E-16 | 1.48E-11 | 0.088 | 0.363 |
| S100A1  | 3 | -0.6838578 | 3.21E-39 | 5.85E-35 | 0.977 | 0.996 |
| BAMBI   | 3 | -0.6875201 | 7.36E-12 | 1.34E-07 | 0.505 | 0.691 |
| CRTAP   | 3 | -0.687996  | 8.30E-38 | 1.51E-33 | 0.42  | 0.859 |
| NNMT    | 3 | -0.6883819 | 2.20E-34 | 4.01E-30 | 0.863 | 0.984 |
| COL2A1  | 3 | -0.6949448 | 2.61E-27 | 4.75E-23 | 0.42  | 0.824 |
| PLAC9   | 3 | -0.6991481 | 8.47E-33 | 1.55E-28 | 0.645 | 0.961 |
| CYR61   | 3 | -0.7215278 | 1.20E-19 | 2.19E-15 | 0.134 | 0.473 |
| TSC22D1 | 3 | -0.7490916 | 5.01E-25 | 9.14E-21 | 0.518 | 0.852 |
| B2M     | 3 | -0.7806325 | 3.19E-56 | 5.82E-52 | 0.993 | 1     |
| C2orf82 | 3 | -0.7928156 | 4.39E-27 | 8.02E-23 | 0.86  | 0.988 |
| GPX3    | 3 | -0.8259654 | 3.35E-43 | 6.11E-39 | 0.902 | 1     |
| MT-ND4  | 3 | -0.8460437 | 2.14E-38 | 3.91E-34 | 0.971 | 0.977 |
| CAPS    | 3 | -0.8502548 | 6.79E-37 | 1.24E-32 | 0.463 | 0.887 |
| MT-CO3  | 3 | -0.8810186 | 4.81E-31 | 8.78E-27 | 0.886 | 0.953 |
| PAX1    | 3 | -0.8822525 | 1.94E-43 | 3.54E-39 | 0.342 | 0.863 |
| RPS20   | 3 | -0.8989436 | 1.28E-80 | 2.33E-76 | 0.997 | 1     |
| MT-ND1  | 3 | -0.9084404 | 4.68E-36 | 8.53E-32 | 0.482 | 0.855 |
| RPS11   | 3 | -0.9273548 | 8.92E-79 | 1.63E-74 | 0.984 | 1     |

| CCL2     | 3       | -0.9315377 | 2.07E-14 | 3.78E-10   | 0.026 | 0.234 |
|----------|---------|------------|----------|------------|-------|-------|
| ACTG1    | 3       | -0.9342111 | 4.49E-49 | 8.20E-45   | 0.899 | 0.992 |
| MGP      | 3       | -1.0304227 | 7.55E-40 | 1.38E-35   | 0.997 | 1     |
| APOD     | 3       | -1.041314  | 1.40E-27 | 2.55E-23   | 0.202 | 0.613 |
| SPTSSB   | 3       | -1.043607  | 1.12E-38 | 2.04E-34   | 0.01  | 0.465 |
| MT-CO1   | 3       | -1.0685374 | 1.23E-42 | 2.24E-38   | 0.971 | 0.98  |
| ADIRF    | 3       | -1.0704599 | 2.81E-51 | 5.13E-47   | 0.228 | 0.828 |
| CLEC3A   | 3       | -1.0727708 | 5.06E-41 | 9.23E-37   | 0.182 | 0.719 |
| MT-ATP6  | 3       | -1.0738792 | 9.66E-46 | 1.76E-41   | 0.798 | 0.945 |
| MT-CO2   | 3       | -1.0904068 | 1.19E-40 | 2.17E-36   | 0.935 | 0.98  |
| NEAT1    | 3       | -1.1047211 | 1.79E-55 | 3.27E-51   | 0.958 | 0.996 |
| OGN      | 3       | -1.1451567 | 3.43E-29 | 6.26E-25   | 0.681 | 0.918 |
| MT-ND2   | 3       | -1.1749745 | 5.87E-45 | 1.07E-40   | 0.56  | 0.895 |
| MT-CYB   | 3       | -1.2123513 | 7.37E-48 | 1.34E-43   | 0.609 | 0.926 |
| MT-ND3   | 3       | -1.2749634 | 3.59E-56 | 6.55E-52   | 0.567 | 0.93  |
| ZFP36L2  | 3       | -1.2784743 | 2.92E-46 | 5.33E-42   | 0.163 | 0.711 |
| FRZB     | 3       | -1.5815535 | 6.30E-43 | 1.15E-38   | 0.143 | 0.699 |
| gene     | cluster | avg_logFC  | p_val    | p_val_adj  | pct.1 | pct.2 |
| PLA2G2A  | 4       | 1.72279508 | 3.48E-43 | 6.34E-39   | 0.841 | 0.28  |
| MT1G     | 4       | 1.28050728 | 1.99E-18 | 3.64E-14   | 0.995 | 0.872 |
| CHI3L2   | 4       | 1.27704128 | 2.47E-52 | 4.51E-48   | 0.914 | 0.412 |
| TGFBI    | 4       | 1.24432252 | 3.95E-44 | 7.21E-40   | 0.777 | 0.243 |
| EPYC     | 4       | 1.16667225 | 1.21E-39 | 2.21E-35   | 0.718 | 0.206 |
| PRG4     | 4       | 1.14319155 | 3.05E-28 | 5.57E-24   | 0.518 | 0.098 |
| SPP1     | 4       | 1.13662918 | 9.43E-45 | 1.72E-40   | 0.582 | 0.027 |
| CYP1B1   | 4       | 1.02761942 | 1.53E-23 | 2.79E-19   | 0.559 | 0.179 |
| MT1X     | 4       | 0.94071142 | 4.97E-24 | 9.08E-20   | 1     | 0.993 |
| CTHRC1   | 4       | 0.93727732 | 9.18E-41 | 1.68E-36   | 0.605 | 0.078 |
| PPP3CA   | 4       | 0.9349202  | 5.97E-31 | 1.09E-26   | 0.941 | 0.659 |
| COMP     | 4       | 0.9180967  | 3.38E-30 | 6.17E-26   | 0.95  | 0.679 |
| MT2A     | 4       | 0.91260638 | 4.47E-18 | 8.15E-14   | 1     | 0.993 |
| MT1H     | 4       | 0.84292468 | 1.06E-07 | 0.00194048 | 0.736 | 0.557 |
| COL1A2   | 4       | 0.76049002 | 1.80E-17 | 3.29E-13   | 0.655 | 0.351 |
| SLC25A37 | 4       | 0.74568213 | 6.78E-30 | 1.24E-25   | 0.905 | 0.622 |
| BTG1     | 4       | 0.70712459 | 3.58E-33 | 6.54E-29   | 0.986 | 0.949 |
| NOVA1    | 4       | 0.67662017 | 1.40E-18 | 2.56E-14   | 0.918 | 0.74  |
| SOD2     | 4       | 0.66404525 | 2.02E-13 | 3.68E-09   | 0.959 | 0.818 |
| CTSD     | 4       | 0.65680894 | 2.04E-09 | 3.71E-05   | 0.995 | 0.959 |
| SAT1     | 4       | 0.65600763 | 7.58E-21 | 1.38E-16   | 0.986 | 0.929 |

|           |   |            |          |            |       |       |
|-----------|---|------------|----------|------------|-------|-------|
| CYTL1     | 4 | 0.64917255 | 1.42E-19 | 2.60E-15   | 0.505 | 0.149 |
| PTGS2     | 4 | 0.63276176 | 1.14E-19 | 2.08E-15   | 0.405 | 0.081 |
| CHI3L1    | 4 | 0.62201206 | 5.48E-12 | 1.00E-07   | 0.977 | 0.929 |
| VEGFA     | 4 | 0.55790285 | 2.72E-15 | 4.96E-11   | 0.705 | 0.47  |
| FN1       | 4 | 0.54717564 | 5.66E-23 | 1.03E-18   | 1     | 1     |
| CFD       | 4 | 0.52392522 | 8.06E-12 | 1.47E-07   | 0.314 | 0.081 |
| CA9       | 4 | 0.51813481 | 4.76E-10 | 8.69E-06   | 0.564 | 0.351 |
| ADAMTS6   | 4 | 0.51542111 | 3.41E-22 | 6.23E-18   | 0.409 | 0.064 |
| CCDC85B   | 4 | 0.51164291 | 7.57E-14 | 1.38E-09   | 0.9   | 0.703 |
| DDIT4L    | 4 | 0.50197031 | 7.91E-19 | 1.44E-14   | 0.614 | 0.25  |
| PMP22     | 4 | 0.50114442 | 2.60E-12 | 4.74E-08   | 0.732 | 0.551 |
| PPP1CB    | 4 | 0.49900184 | 1.58E-09 | 2.89E-05   | 0.85  | 0.733 |
| MT1M      | 4 | 0.48897559 | 4.44E-12 | 8.10E-08   | 0.705 | 0.476 |
| TNFRSF11B | 4 | 0.48718772 | 1.24E-08 | 0.00022562 | 0.686 | 0.497 |
| SORBS2    | 4 | 0.47759468 | 1.12E-06 | 0.02049236 | 0.286 | 0.125 |
| COL11A1   | 4 | 0.47658269 | 8.07E-09 | 0.00014733 | 0.945 | 0.963 |
| CD44      | 4 | 0.47196626 | 4.23E-15 | 7.71E-11   | 0.782 | 0.5   |
| AEBP1     | 4 | 0.47062752 | 1.88E-15 | 3.42E-11   | 0.868 | 0.699 |
| TIMP1     | 4 | 0.46080403 | 1.36E-06 | 0.02480794 | 0.995 | 1     |
| SERPINE2  | 4 | 0.45705652 | 4.88E-07 | 0.00890387 | 1     | 0.976 |
| HAPLN1    | 4 | 0.45492584 | 8.26E-11 | 1.51E-06   | 0.795 | 0.662 |
| C7orf73   | 4 | 0.44595352 | 3.85E-15 | 7.02E-11   | 0.959 | 0.875 |
| SCRG1     | 4 | 0.43853862 | 5.11E-09 | 9.33E-05   | 1     | 1     |
| CLEC11A   | 4 | 0.43754519 | 6.88E-11 | 1.25E-06   | 0.65  | 0.419 |
| TMSB4X    | 4 | 0.42858929 | 1.03E-11 | 1.87E-07   | 0.909 | 0.794 |
| C4orf48   | 4 | 0.42626596 | 8.61E-11 | 1.57E-06   | 0.591 | 0.355 |
| CCDC80    | 4 | 0.42303807 | 2.10E-11 | 3.83E-07   | 0.986 | 0.966 |
| WWP2      | 4 | 0.41690751 | 4.29E-10 | 7.83E-06   | 0.723 | 0.591 |
| SMOC2     | 4 | 0.41180124 | 7.75E-17 | 1.41E-12   | 0.391 | 0.091 |
| BAMBI     | 4 | 0.40513128 | 6.76E-10 | 1.23E-05   | 0.768 | 0.568 |
| RNF145    | 4 | 0.40046319 | 2.93E-10 | 5.34E-06   | 0.573 | 0.361 |
| WTAP      | 4 | 0.39424925 | 1.33E-10 | 2.43E-06   | 0.741 | 0.544 |
| MT1F      | 4 | 0.39244093 | 1.19E-08 | 0.00021633 | 0.973 | 0.885 |
| PDE4B     | 4 | 0.38347356 | 4.05E-18 | 7.40E-14   | 0.305 | 0.03  |
| SRGN      | 4 | 0.37548095 | 1.26E-09 | 2.30E-05   | 0.582 | 0.355 |
| IFITM10   | 4 | 0.37361295 | 2.27E-11 | 4.13E-07   | 0.645 | 0.385 |
| RABGGTB   | 4 | 0.36683067 | 7.67E-09 | 0.00013989 | 0.6   | 0.419 |
| HIF1A     | 4 | 0.3636777  | 1.07E-10 | 1.96E-06   | 0.955 | 0.905 |
| BZW1      | 4 | 0.36054342 | 5.03E-09 | 9.18E-05   | 0.645 | 0.463 |

|          |   |            |          |            |       |       |
|----------|---|------------|----------|------------|-------|-------|
| BAALC    | 4 | 0.35775301 | 2.45E-09 | 4.46E-05   | 0.582 | 0.358 |
| CRIP1    | 4 | 0.35754091 | 5.73E-14 | 1.05E-09   | 0.7   | 0.361 |
| FKBP9    | 4 | 0.34858527 | 2.49E-12 | 4.54E-08   | 0.445 | 0.172 |
| TSHZ2    | 4 | 0.33569788 | 1.08E-17 | 1.96E-13   | 0.268 | 0.017 |
| LTBP1    | 4 | 0.31927715 | 2.11E-21 | 3.85E-17   | 0.345 | 0.03  |
| FOSL1    | 4 | 0.31891982 | 7.69E-13 | 1.40E-08   | 0.25  | 0.037 |
| WSB1     | 4 | 0.31830439 | 1.78E-08 | 0.00032421 | 0.9   | 0.841 |
| CRLF1    | 4 | 0.31498535 | 2.14E-11 | 3.90E-07   | 0.482 | 0.213 |
| PHLDA1   | 4 | 0.3149695  | 2.27E-06 | 0.04134883 | 0.227 | 0.084 |
| PAM      | 4 | 0.30953618 | 7.11E-10 | 1.30E-05   | 0.864 | 0.75  |
| DDIT3    | 4 | 0.30260852 | 1.00E-06 | 0.01827282 | 0.536 | 0.361 |
| BMP2     | 4 | 0.29999455 | 1.81E-09 | 3.31E-05   | 0.182 | 0.027 |
| C11orf31 | 4 | 0.29977605 | 9.60E-09 | 0.00017517 | 0.8   | 0.689 |
| EVI2A    | 4 | 0.29352163 | 7.51E-13 | 1.37E-08   | 0.268 | 0.047 |
| COX17    | 4 | 0.28659424 | 5.58E-07 | 0.01018838 | 0.818 | 0.733 |
| CCDC151  | 4 | 0.2812961  | 2.02E-06 | 0.03690321 | 0.545 | 0.385 |
| BIRC2    | 4 | 0.27091121 | 1.87E-06 | 0.03410422 | 0.645 | 0.483 |
| ANXA1    | 4 | -0.2501837 | 6.74E-07 | 0.01230298 | 0.686 | 0.824 |
| ZNF90    | 4 | -0.2517189 | 4.69E-07 | 0.00855967 | 0.486 | 0.676 |
| DPYSL3   | 4 | -0.2520024 | 5.21E-09 | 9.51E-05   | 0.168 | 0.402 |
| RPS15A   | 4 | -0.2520882 | 3.31E-24 | 6.04E-20   | 1     | 1     |
| CHMP2A   | 4 | -0.2520909 | 1.87E-07 | 0.00341164 | 0.418 | 0.611 |
| HEBP1    | 4 | -0.2545033 | 9.59E-09 | 0.00017495 | 0.25  | 0.486 |
| DNAJC1   | 4 | -0.254511  | 1.59E-08 | 0.00029087 | 0.155 | 0.372 |
| FAU      | 4 | -0.2545489 | 7.99E-17 | 1.46E-12   | 1     | 1     |
| SF1      | 4 | -0.2564281 | 1.07E-07 | 0.00195819 | 0.373 | 0.584 |
| MZT2A    | 4 | -0.2564281 | 3.74E-08 | 0.00068175 | 0.732 | 0.878 |
| KCNQ1OT1 | 4 | -0.2571947 | 1.67E-06 | 0.03039441 | 0.2   | 0.382 |
| CHID1    | 4 | -0.2577319 | 3.09E-07 | 0.00563381 | 0.536 | 0.723 |
| UQCRHL   | 4 | -0.258992  | 1.27E-09 | 2.32E-05   | 0.355 | 0.611 |
| RGS10    | 4 | -0.2590671 | 1.48E-08 | 0.00027026 | 0.264 | 0.514 |
| RPL26    | 4 | -0.2598436 | 1.63E-20 | 2.98E-16   | 1     | 1     |
| P3H2     | 4 | -0.2606971 | 1.82E-06 | 0.03316826 | 0.277 | 0.47  |
| SLC25A5  | 4 | -0.2620071 | 2.43E-09 | 4.44E-05   | 0.309 | 0.578 |
| NDUFC2   | 4 | -0.2625699 | 4.39E-07 | 0.00800582 | 0.605 | 0.78  |
| SLC44A1  | 4 | -0.2628839 | 2.01E-06 | 0.03671436 | 0.355 | 0.537 |
| TXN      | 4 | -0.2635461 | 1.16E-07 | 0.00211118 | 0.791 | 0.912 |
| NPDC1    | 4 | -0.2639738 | 1.34E-07 | 0.00244188 | 0.182 | 0.378 |
| PLXDC2   | 4 | -0.2643258 | 7.19E-07 | 0.01311453 | 0.505 | 0.679 |

|              |   |            |          |            |       |       |
|--------------|---|------------|----------|------------|-------|-------|
| NUCB2        | 4 | -0.2646036 | 1.47E-06 | 0.02684801 | 0.341 | 0.527 |
| RPS12        | 4 | -0.2646204 | 5.42E-21 | 9.88E-17   | 1     | 1     |
| RNH1         | 4 | -0.2651633 | 1.42E-06 | 0.02582481 | 0.327 | 0.507 |
| EID1         | 4 | -0.2661945 | 1.67E-10 | 3.04E-06   | 0.945 | 0.986 |
| EEF1D        | 4 | -0.2666428 | 1.57E-13 | 2.87E-09   | 0.991 | 1     |
| BEX2         | 4 | -0.2669572 | 2.23E-08 | 0.00040614 | 0.205 | 0.432 |
| ARPC1A       | 4 | -0.2678467 | 1.04E-08 | 0.00019056 | 0.545 | 0.75  |
| BNIP3L       | 4 | -0.2681106 | 1.52E-08 | 0.00027773 | 0.768 | 0.909 |
| TENM3        | 4 | -0.2682942 | 3.82E-12 | 6.98E-08   | 0.068 | 0.321 |
| RPL28        | 4 | -0.2684607 | 5.57E-24 | 1.02E-19   | 1     | 1     |
| RPL3         | 4 | -0.2690076 | 5.68E-21 | 1.04E-16   | 1     | 1     |
| C14orf1      | 4 | -0.2705762 | 7.56E-07 | 0.01379216 | 0.286 | 0.473 |
| PDIA6        | 4 | -0.2713102 | 3.15E-07 | 0.00574942 | 0.7   | 0.868 |
| UQCRH        | 4 | -0.2716997 | 1.77E-11 | 3.24E-07   | 0.964 | 0.983 |
| HOXB6        | 4 | -0.2732369 | 4.35E-07 | 0.00793215 | 0.309 | 0.497 |
| RABAC1       | 4 | -0.2733028 | 5.35E-11 | 9.77E-07   | 0.818 | 0.949 |
| RPS25        | 4 | -0.2734299 | 2.58E-24 | 4.71E-20   | 1     | 1     |
| PPIA         | 4 | -0.2734402 | 4.74E-10 | 8.64E-06   | 0.945 | 0.997 |
| RWDD1        | 4 | -0.2741767 | 2.26E-07 | 0.00411599 | 0.645 | 0.774 |
| HADHA        | 4 | -0.2746104 | 2.69E-08 | 0.00049003 | 0.336 | 0.568 |
| RP11-71N10.1 | 4 | -0.2751148 | 1.86E-08 | 0.00033997 | 0.159 | 0.378 |
| UBB          | 4 | -0.2754384 | 3.74E-08 | 0.00068154 | 0.709 | 0.895 |
| RPL27A       | 4 | -0.2758275 | 3.85E-25 | 7.03E-21   | 1     | 1     |
| RPL36AL      | 4 | -0.2758668 | 2.03E-14 | 3.70E-10   | 0.995 | 1     |
| ATP5G2       | 4 | -0.2767568 | 5.50E-11 | 1.00E-06   | 0.982 | 0.993 |
| RPL24        | 4 | -0.277097  | 8.65E-23 | 1.58E-18   | 1     | 1     |
| RPS9         | 4 | -0.2771242 | 3.26E-25 | 5.95E-21   | 1     | 1     |
| TUBB4B       | 4 | -0.2772468 | 7.28E-07 | 0.01328982 | 0.323 | 0.517 |
| ATP5L        | 4 | -0.2776317 | 1.35E-10 | 2.46E-06   | 0.932 | 0.97  |
| MPP6         | 4 | -0.2797598 | 1.25E-10 | 2.28E-06   | 0.214 | 0.48  |
| GNB2L1       | 4 | -0.2805237 | 6.68E-16 | 1.22E-11   | 0.995 | 0.997 |
| KRTCAP2      | 4 | -0.2811659 | 7.70E-09 | 0.00014051 | 0.655 | 0.851 |
| PRKCSH       | 4 | -0.2821559 | 5.03E-08 | 0.00091835 | 0.291 | 0.514 |
| NFIC         | 4 | -0.2823967 | 1.32E-08 | 0.00024174 | 0.391 | 0.615 |
| HSP90AB1     | 4 | -0.282471  | 1.35E-07 | 0.00246441 | 0.877 | 0.946 |
| MALAT1       | 4 | -0.2826625 | 5.53E-08 | 0.00100996 | 1     | 1     |
| RPL11        | 4 | -0.2834777 | 3.45E-26 | 6.29E-22   | 1     | 1     |
| GPC1         | 4 | -0.2837421 | 2.32E-13 | 4.24E-09   | 0.1   | 0.385 |
| ARPC2        | 4 | -0.2843579 | 6.88E-07 | 0.01255237 | 0.714 | 0.831 |

|          |   |            |          |            |       |       |
|----------|---|------------|----------|------------|-------|-------|
| PCBP2    | 4 | -0.286582  | 1.62E-11 | 2.95E-07   | 0.941 | 0.983 |
| C19orf43 | 4 | -0.2882017 | 2.42E-10 | 4.41E-06   | 0.764 | 0.882 |
| NFIA     | 4 | -0.2883916 | 2.72E-08 | 0.00049581 | 0.432 | 0.642 |
| RPS21    | 4 | -0.2885217 | 7.21E-23 | 1.32E-18   | 1     | 1     |
| RPS6     | 4 | -0.2888516 | 2.03E-29 | 3.70E-25   | 1     | 1     |
| RPL35    | 4 | -0.2891312 | 8.61E-28 | 1.57E-23   | 1     | 1     |
| CIRBP    | 4 | -0.2908788 | 1.70E-09 | 3.10E-05   | 0.968 | 0.98  |
| RPL22    | 4 | -0.290942  | 1.95E-21 | 3.56E-17   | 1     | 1     |
| RPS2     | 4 | -0.2909991 | 2.34E-26 | 4.27E-22   | 1     | 1     |
| EIF2A    | 4 | -0.2913011 | 9.45E-07 | 0.0172367  | 0.586 | 0.747 |
| AP2M1    | 4 | -0.2936222 | 1.61E-09 | 2.93E-05   | 0.455 | 0.709 |
| EIF3F    | 4 | -0.2940839 | 1.26E-08 | 0.00022982 | 0.736 | 0.889 |
| ZFXH4    | 4 | -0.2947653 | 3.64E-11 | 6.64E-07   | 0.2   | 0.47  |
| ATP5A1   | 4 | -0.2947826 | 2.87E-08 | 0.00052375 | 0.455 | 0.655 |
| FBL      | 4 | -0.2951239 | 2.63E-08 | 0.00047909 | 0.355 | 0.571 |
| EIF1     | 4 | -0.2955972 | 1.42E-15 | 2.59E-11   | 1     | 1     |
| RPL27    | 4 | -0.2973367 | 3.84E-22 | 7.00E-18   | 1     | 1     |
| SRP14    | 4 | -0.2984044 | 1.93E-14 | 3.53E-10   | 0.982 | 0.997 |
| RPS7     | 4 | -0.3007548 | 7.94E-24 | 1.45E-19   | 1     | 1     |
| RPL13    | 4 | -0.3008355 | 2.70E-33 | 4.93E-29   | 1     | 1     |
| HSPD1    | 4 | -0.3014175 | 3.90E-09 | 7.12E-05   | 0.295 | 0.551 |
| HOXB8    | 4 | -0.3019244 | 1.53E-10 | 2.78E-06   | 0.109 | 0.345 |
| ISM1     | 4 | -0.3019551 | 3.86E-10 | 7.05E-06   | 0.232 | 0.497 |
| CREG1    | 4 | -0.3024277 | 4.38E-10 | 8.00E-06   | 0.355 | 0.625 |
| REEP5    | 4 | -0.3034248 | 4.70E-11 | 8.58E-07   | 0.414 | 0.709 |
| SQLE     | 4 | -0.3036609 | 7.24E-09 | 0.0001322  | 0.136 | 0.355 |
| RPL29    | 4 | -0.3057791 | 1.12E-27 | 2.04E-23   | 1     | 1     |
| NACA     | 4 | -0.3059923 | 3.20E-19 | 5.84E-15   | 1     | 1     |
| VIM      | 4 | -0.3061186 | 1.06E-10 | 1.93E-06   | 1     | 1     |
| PFN1     | 4 | -0.3082919 | 8.58E-10 | 1.57E-05   | 0.877 | 0.959 |
| RARRES3  | 4 | -0.3097719 | 2.56E-11 | 4.67E-07   | 0.114 | 0.365 |
| RAC1     | 4 | -0.3100997 | 1.25E-11 | 2.29E-07   | 0.827 | 0.939 |
| HDLBP    | 4 | -0.3124689 | 8.11E-08 | 0.00147912 | 0.523 | 0.662 |
| TOMM7    | 4 | -0.3143676 | 7.81E-25 | 1.43E-20   | 1     | 1     |
| HNRNPA1  | 4 | -0.3143899 | 4.75E-10 | 8.67E-06   | 0.977 | 0.997 |
| ITGA11   | 4 | -0.3149999 | 4.71E-12 | 8.60E-08   | 0.095 | 0.355 |
| RPL10    | 4 | -0.3152705 | 2.81E-33 | 5.12E-29   | 1     | 1     |
| TBL1XR1  | 4 | -0.3159429 | 2.73E-06 | 0.04976411 | 0.586 | 0.75  |
| CCDC8    | 4 | -0.3167085 | 1.42E-11 | 2.59E-07   | 0.118 | 0.378 |



|           |   |            |          |            |       |       |
|-----------|---|------------|----------|------------|-------|-------|
| MT-ND5    | 4 | -0.3167867 | 4.51E-08 | 0.00082349 | 0.586 | 0.78  |
| EDF1      | 4 | -0.3177972 | 6.80E-16 | 1.24E-11   | 0.941 | 0.986 |
| GADD45B   | 4 | -0.3179146 | 8.61E-07 | 0.01571432 | 0.291 | 0.503 |
| PRDX6     | 4 | -0.318401  | 3.37E-10 | 6.16E-06   | 0.659 | 0.851 |
| RPS5      | 4 | -0.3207004 | 1.28E-27 | 2.34E-23   | 1     | 1     |
| PKM       | 4 | -0.3220426 | 5.51E-11 | 1.01E-06   | 0.895 | 0.953 |
| NPM1      | 4 | -0.3236013 | 5.51E-10 | 1.01E-05   | 0.973 | 0.993 |
| RPS23     | 4 | -0.3253018 | 3.89E-33 | 7.10E-29   | 1     | 1     |
| PTRF      | 4 | -0.3260116 | 6.92E-10 | 1.26E-05   | 0.591 | 0.801 |
| GLTSCR2   | 4 | -0.3283798 | 8.74E-11 | 1.59E-06   | 0.877 | 0.953 |
| PSAP      | 4 | -0.328974  | 5.62E-12 | 1.02E-07   | 0.886 | 0.956 |
| LDHB      | 4 | -0.3293631 | 4.28E-11 | 7.81E-07   | 0.586 | 0.855 |
| RPL18A    | 4 | -0.3295418 | 3.18E-33 | 5.79E-29   | 1     | 1     |
| ATP5H     | 4 | -0.3300644 | 7.62E-11 | 1.39E-06   | 0.509 | 0.76  |
| ID4       | 4 | -0.3301852 | 1.22E-08 | 0.00022234 | 0.705 | 0.872 |
| EIF3D     | 4 | -0.331419  | 6.18E-10 | 1.13E-05   | 0.541 | 0.77  |
| RPS19     | 4 | -0.3323246 | 9.02E-33 | 1.65E-28   | 1     | 1     |
| LGALS1    | 4 | -0.3331364 | 1.89E-10 | 3.45E-06   | 0.991 | 0.993 |
| C14orf166 | 4 | -0.3337881 | 8.30E-12 | 1.51E-07   | 0.627 | 0.834 |
| UBA52     | 4 | -0.3342208 | 3.63E-33 | 6.63E-29   | 1     | 1     |
| COL14A1   | 4 | -0.3344485 | 3.62E-10 | 6.61E-06   | 0.05  | 0.257 |
| CTGF      | 4 | -0.3364656 | 1.94E-07 | 0.00354721 | 0.836 | 0.97  |
| CD63      | 4 | -0.3385182 | 3.71E-11 | 6.77E-07   | 0.995 | 1     |
| PABPC1    | 4 | -0.3396137 | 4.99E-12 | 9.11E-08   | 0.891 | 0.97  |
| RPS18     | 4 | -0.3398235 | 1.31E-35 | 2.39E-31   | 1     | 1     |
| FTL       | 4 | -0.3406741 | 7.99E-21 | 1.46E-16   | 1     | 1     |
| SLC25A3   | 4 | -0.3412489 | 7.09E-13 | 1.29E-08   | 0.782 | 0.949 |
| ITM2A     | 4 | -0.3427464 | 3.34E-08 | 0.00061027 | 0.568 | 0.76  |
| MSMO1     | 4 | -0.3443856 | 1.01E-07 | 0.00184495 | 0.227 | 0.429 |
| NINJ1     | 4 | -0.3457559 | 3.51E-10 | 6.41E-06   | 0.555 | 0.743 |
| GSTP1     | 4 | -0.3473717 | 8.12E-12 | 1.48E-07   | 0.918 | 0.966 |
| RPL21     | 4 | -0.3484704 | 9.03E-44 | 1.65E-39   | 1     | 1     |
| COX7C     | 4 | -0.3487182 | 2.06E-24 | 3.77E-20   | 1     | 1     |
| B2M       | 4 | -0.3487914 | 2.79E-17 | 5.10E-13   | 0.995 | 1     |
| KHDRBS3   | 4 | -0.3526799 | 1.35E-16 | 2.47E-12   | 0.009 | 0.284 |
| RPL35A    | 4 | -0.356493  | 6.05E-35 | 1.10E-30   | 1     | 1     |
| RPS27     | 4 | -0.3570262 | 9.06E-36 | 1.65E-31   | 1     | 1     |
| RPL31     | 4 | -0.3587749 | 1.48E-32 | 2.69E-28   | 1     | 1     |
| PLP2      | 4 | -0.3597979 | 3.97E-12 | 7.24E-08   | 0.514 | 0.801 |

|           |   |            |          |            |       |       |
|-----------|---|------------|----------|------------|-------|-------|
| MGP       | 4 | -0.360526  | 3.18E-09 | 5.79E-05   | 1     | 1     |
| DMKN      | 4 | -0.3605905 | 1.76E-12 | 3.21E-08   | 0.395 | 0.669 |
| CST3      | 4 | -0.3625401 | 4.27E-14 | 7.79E-10   | 0.991 | 1     |
| NGFRAP1   | 4 | -0.3628153 | 6.12E-15 | 1.12E-10   | 0.932 | 0.98  |
| IGFBP7    | 4 | -0.3656961 | 4.07E-08 | 0.00074228 | 0.932 | 0.946 |
| SEC11A    | 4 | -0.3662782 | 5.80E-16 | 1.06E-11   | 0.814 | 0.946 |
| MOXD1     | 4 | -0.3670014 | 1.08E-09 | 1.97E-05   | 0.223 | 0.453 |
| NAP1L1    | 4 | -0.3690003 | 7.60E-14 | 1.39E-09   | 0.914 | 0.956 |
| RPSA      | 4 | -0.3690855 | 5.96E-25 | 1.09E-20   | 1     | 1     |
| TSPO      | 4 | -0.3700776 | 7.28E-15 | 1.33E-10   | 0.786 | 0.929 |
| PEBP1     | 4 | -0.3740143 | 3.61E-16 | 6.58E-12   | 0.727 | 0.953 |
| CPE       | 4 | -0.3742311 | 7.63E-13 | 1.39E-08   | 0.5   | 0.794 |
| HOXC10    | 4 | -0.3744364 | 2.94E-12 | 5.36E-08   | 0.523 | 0.76  |
| RPL8      | 4 | -0.3754563 | 1.22E-42 | 2.23E-38   | 1     | 1     |
| CALM3     | 4 | -0.3764498 | 6.38E-12 | 1.16E-07   | 0.545 | 0.791 |
| ERGIC3    | 4 | -0.3772454 | 7.65E-15 | 1.40E-10   | 0.795 | 0.939 |
| RPL37     | 4 | -0.3779345 | 5.32E-37 | 9.70E-33   | 1     | 1     |
| AFF3      | 4 | -0.378266  | 3.74E-15 | 6.83E-11   | 0.195 | 0.541 |
| RPL19     | 4 | -0.3798681 | 5.54E-41 | 1.01E-36   | 1     | 1     |
| PDE4DIP   | 4 | -0.3799765 | 8.47E-13 | 1.55E-08   | 0.459 | 0.709 |
| SLC25A6   | 4 | -0.3803636 | 1.16E-20 | 2.11E-16   | 0.964 | 0.997 |
| YBX3      | 4 | -0.3840504 | 4.00E-15 | 7.30E-11   | 0.745 | 0.939 |
| SPTLC3    | 4 | -0.3891636 | 2.64E-07 | 0.00481184 | 0.286 | 0.5   |
| CAV1      | 4 | -0.3892614 | 6.06E-13 | 1.11E-08   | 0.573 | 0.807 |
| RPL13A    | 4 | -0.390582  | 2.95E-47 | 5.39E-43   | 1     | 1     |
| HIF1A-AS2 | 4 | -0.391369  | 5.76E-08 | 0.00105022 | 0.264 | 0.47  |
| RPS29     | 4 | -0.3918228 | 4.34E-42 | 7.91E-38   | 1     | 1     |
| RPL4      | 4 | -0.3920062 | 2.40E-29 | 4.39E-25   | 1     | 1     |
| ARL2BP    | 4 | -0.3925217 | 1.62E-14 | 2.95E-10   | 0.505 | 0.77  |
| RHOA      | 4 | -0.3946807 | 1.66E-14 | 3.02E-10   | 0.718 | 0.916 |
| SLC14A1   | 4 | -0.3964153 | 4.30E-13 | 7.85E-09   | 0.318 | 0.622 |
| ARHGAP29  | 4 | -0.3977131 | 2.52E-11 | 4.61E-07   | 0.427 | 0.689 |
| CXXC5     | 4 | -0.4017344 | 5.40E-12 | 9.85E-08   | 0.459 | 0.689 |
| RPL9      | 4 | -0.406068  | 1.71E-41 | 3.12E-37   | 1     | 1     |
| TSC22D1   | 4 | -0.407948  | 7.89E-08 | 0.00143937 | 0.673 | 0.845 |
| SSR2      | 4 | -0.4106713 | 9.81E-19 | 1.79E-14   | 0.777 | 0.943 |
| LPP       | 4 | -0.4115671 | 1.91E-09 | 3.49E-05   | 0.45  | 0.682 |
| TPT1      | 4 | -0.4127313 | 9.75E-38 | 1.78E-33   | 1     | 1     |
| KDELR2    | 4 | -0.4133019 | 3.08E-15 | 5.62E-11   | 0.791 | 0.956 |

|         |   |            |          |            |       |       |
|---------|---|------------|----------|------------|-------|-------|
| AHNAK2  | 4 | -0.4154635 | 4.28E-12 | 7.81E-08   | 0.236 | 0.507 |
| RPL14   | 4 | -0.4170346 | 1.33E-37 | 2.42E-33   | 1     | 1     |
| EIF3L   | 4 | -0.4181629 | 7.36E-19 | 1.34E-14   | 0.814 | 0.99  |
| RPS3A   | 4 | -0.4185924 | 7.23E-47 | 1.32E-42   | 1     | 1     |
| PSMA7   | 4 | -0.4198082 | 7.59E-14 | 1.38E-09   | 0.614 | 0.848 |
| RPL10A  | 4 | -0.4213892 | 2.78E-37 | 5.07E-33   | 1     | 1     |
| C2orf82 | 4 | -0.4215395 | 1.92E-13 | 3.50E-09   | 0.955 | 1     |
| MYL12B  | 4 | -0.4242116 | 8.84E-16 | 1.61E-11   | 0.509 | 0.787 |
| PLA2G16 | 4 | -0.4292051 | 1.60E-14 | 2.93E-10   | 0.209 | 0.514 |
| ISLR    | 4 | -0.4305624 | 8.42E-12 | 1.54E-07   | 0.582 | 0.801 |
| ST13    | 4 | -0.4308906 | 5.74E-19 | 1.05E-14   | 0.895 | 0.98  |
| UMAD1   | 4 | -0.4316189 | 7.74E-12 | 1.41E-07   | 0.341 | 0.581 |
| NKX3-2  | 4 | -0.4344289 | 1.61E-13 | 2.94E-09   | 0.159 | 0.459 |
| DAB2    | 4 | -0.434909  | 3.34E-10 | 6.10E-06   | 0.418 | 0.625 |
| EIF3K   | 4 | -0.4352275 | 6.21E-18 | 1.13E-13   | 0.7   | 0.909 |
| RPS13   | 4 | -0.4371232 | 1.19E-43 | 2.18E-39   | 1     | 1     |
| DSEL    | 4 | -0.4372373 | 3.09E-07 | 0.00563676 | 0.295 | 0.48  |
| BTF3    | 4 | -0.4385305 | 4.80E-28 | 8.77E-24   | 1     | 1     |
| RPL23   | 4 | -0.4421603 | 4.10E-37 | 7.49E-33   | 0.995 | 1     |
| RPL23A  | 4 | -0.4425396 | 1.29E-46 | 2.35E-42   | 1     | 1     |
| CCNI    | 4 | -0.4429762 | 3.32E-26 | 6.06E-22   | 0.991 | 1     |
| RPS17   | 4 | -0.446854  | 4.41E-47 | 8.04E-43   | 1     | 1     |
| RPLP2   | 4 | -0.4470842 | 3.19E-53 | 5.82E-49   | 1     | 1     |
| RPL34   | 4 | -0.4487295 | 7.03E-51 | 1.28E-46   | 1     | 1     |
| EEF1B2  | 4 | -0.4529687 | 1.65E-24 | 3.01E-20   | 0.973 | 1     |
| MYLK    | 4 | -0.4538399 | 7.74E-13 | 1.41E-08   | 0.314 | 0.595 |
| RPS27A  | 4 | -0.4565797 | 1.82E-48 | 3.32E-44   | 1     | 1     |
| HLA-C   | 4 | -0.4616976 | 1.11E-16 | 2.03E-12   | 0.814 | 0.966 |
| CALM1   | 4 | -0.4641953 | 1.26E-12 | 2.30E-08   | 0.432 | 0.699 |
| UQCRB   | 4 | -0.4672016 | 2.14E-26 | 3.91E-22   | 0.959 | 0.99  |
| HLA-B   | 4 | -0.4692851 | 4.41E-18 | 8.05E-14   | 0.736 | 0.939 |
| MT-CO2  | 4 | -0.4705628 | 5.21E-21 | 9.50E-17   | 0.977 | 0.98  |
| RPS8    | 4 | -0.4705716 | 6.03E-49 | 1.10E-44   | 1     | 1     |
| SSR3    | 4 | -0.4775886 | 2.90E-20 | 5.29E-16   | 0.786 | 0.963 |
| ATP5O   | 4 | -0.4780526 | 3.08E-21 | 5.62E-17   | 0.641 | 0.902 |
| ACTB    | 4 | -0.4796401 | 6.45E-16 | 1.18E-11   | 0.845 | 0.966 |
| RPL30   | 4 | -0.4832956 | 2.79E-47 | 5.09E-43   | 1     | 1     |
| HINT1   | 4 | -0.4849371 | 1.08E-33 | 1.98E-29   | 0.964 | 1     |
| MT-ND4  | 4 | -0.4855809 | 1.56E-20 | 2.84E-16   | 0.986 | 0.973 |

|           |   |            |          |            |       |       |
|-----------|---|------------|----------|------------|-------|-------|
| CRIP2     | 4 | -0.4860274 | 8.53E-16 | 1.56E-11   | 0.382 | 0.672 |
| SPINT2    | 4 | -0.4957646 | 8.93E-18 | 1.63E-13   | 0.223 | 0.588 |
| NEAT1     | 4 | -0.5024424 | 6.05E-16 | 1.10E-11   | 0.991 | 1     |
| RPL7      | 4 | -0.5085314 | 9.08E-45 | 1.66E-40   | 1     | 1     |
| TUBB2B    | 4 | -0.5116743 | 6.41E-09 | 0.00011702 | 0.55  | 0.747 |
| MAGED1    | 4 | -0.5129766 | 1.02E-06 | 0.01857691 | 0.368 | 0.554 |
| MYL6      | 4 | -0.5144393 | 9.29E-29 | 1.69E-24   | 0.932 | 0.983 |
| RPS16     | 4 | -0.5180298 | 2.18E-51 | 3.98E-47   | 1     | 1     |
| EIF4B     | 4 | -0.5232577 | 6.95E-20 | 1.27E-15   | 0.691 | 0.895 |
| TCF4      | 4 | -0.523282  | 2.00E-16 | 3.65E-12   | 0.541 | 0.774 |
| ZFAS1     | 4 | -0.524824  | 2.57E-22 | 4.68E-18   | 0.968 | 0.993 |
| ATRNL1    | 4 | -0.5263013 | 2.15E-22 | 3.91E-18   | 0.232 | 0.652 |
| DCN       | 4 | -0.5304061 | 1.11E-27 | 2.03E-23   | 1     | 1     |
| LINC01503 | 4 | -0.5306648 | 1.61E-11 | 2.94E-07   | 0.505 | 0.733 |
| CRYAB     | 4 | -0.5398239 | 5.54E-15 | 1.01E-10   | 0.895 | 0.966 |
| NPC2      | 4 | -0.5400468 | 7.84E-32 | 1.43E-27   | 0.982 | 0.997 |
| SDC2      | 4 | -0.5402974 | 2.64E-21 | 4.82E-17   | 0.864 | 0.963 |
| EEF2      | 4 | -0.5425338 | 2.76E-25 | 5.04E-21   | 0.991 | 1     |
| CRTAP     | 4 | -0.5425481 | 2.77E-27 | 5.05E-23   | 0.668 | 0.916 |
| FBXO2     | 4 | -0.5459077 | 4.47E-19 | 8.16E-15   | 0.805 | 0.936 |
| INSIG1    | 4 | -0.5461195 | 2.43E-12 | 4.43E-08   | 0.286 | 0.568 |
| HIST1H1C  | 4 | -0.5574461 | 3.49E-13 | 6.38E-09   | 0.177 | 0.459 |
| RPL18     | 4 | -0.5732253 | 1.53E-57 | 2.80E-53   | 1     | 1     |
| TUBB      | 4 | -0.5802107 | 2.12E-21 | 3.88E-17   | 0.714 | 0.926 |
| APOD      | 4 | -0.586284  | 4.16E-15 | 7.58E-11   | 0.173 | 0.486 |
| PAX1      | 4 | -0.5971622 | 3.60E-24 | 6.57E-20   | 0.673 | 0.905 |
| HLA-A     | 4 | -0.6095085 | 1.37E-25 | 2.49E-21   | 0.786 | 0.966 |
| MT-CO3    | 4 | -0.6102879 | 3.71E-30 | 6.78E-26   | 0.977 | 0.956 |
| GREM1     | 4 | -0.6131894 | 6.11E-10 | 1.12E-05   | 0.077 | 0.294 |
| EEF1A1    | 4 | -0.6149488 | 2.98E-56 | 5.43E-52   | 1     | 1     |
| RPLP0     | 4 | -0.6163979 | 7.04E-65 | 1.28E-60   | 1     | 1     |
| CITED2    | 4 | -0.6195588 | 4.27E-16 | 7.79E-12   | 0.477 | 0.774 |
| MT-ND1    | 4 | -0.6329123 | 5.94E-24 | 1.08E-19   | 0.745 | 0.912 |
| OGN       | 4 | -0.6520344 | 5.44E-20 | 9.92E-16   | 1     | 1     |
| TPM1      | 4 | -0.662913  | 3.63E-16 | 6.63E-12   | 0.65  | 0.865 |
| OSBPL9    | 4 | -0.6696352 | 1.62E-26 | 2.96E-22   | 0.277 | 0.689 |
| MT-CO1    | 4 | -0.6917164 | 3.11E-30 | 5.67E-26   | 0.977 | 0.966 |
| CLEC3A    | 4 | -0.6969906 | 1.23E-16 | 2.24E-12   | 0.409 | 0.77  |
| MT-ATP6   | 4 | -0.7164844 | 2.02E-27 | 3.68E-23   | 0.936 | 0.949 |

| RGCC     | 4       | -0.7224965 | 4.35E-11 | 7.95E-07  | 0.723 | 0.851 |
|----------|---------|------------|----------|-----------|-------|-------|
| MSMP     | 4       | -0.7400347 | 4.19E-10 | 7.64E-06  | 0.077 | 0.297 |
| PLPP1    | 4       | -0.741753  | 1.27E-26 | 2.31E-22  | 0.4   | 0.794 |
| ACTG1    | 4       | -0.7541412 | 1.30E-32 | 2.38E-28  | 0.864 | 0.986 |
| THY1     | 4       | -0.7585601 | 2.19E-21 | 4.00E-17  | 0.7   | 0.892 |
| CD9      | 4       | -0.7625193 | 4.48E-26 | 8.17E-22  | 0.386 | 0.787 |
| CCDC102B | 4       | -0.766985  | 8.80E-38 | 1.61E-33  | 0.095 | 0.652 |
| MT-ND2   | 4       | -0.7723303 | 3.42E-25 | 6.24E-21  | 0.782 | 0.916 |
| EIF3H    | 4       | -0.7743928 | 2.37E-49 | 4.33E-45  | 0.9   | 1     |
| MT-ND3   | 4       | -0.8252386 | 1.38E-38 | 2.52E-34  | 0.855 | 0.932 |
| FHL1     | 4       | -0.8439919 | 3.33E-27 | 6.07E-23  | 0.545 | 0.841 |
| FTH1     | 4       | -0.8493686 | 5.66E-57 | 1.03E-52  | 1     | 1     |
| XAGE2    | 4       | -0.8711722 | 3.63E-15 | 6.62E-11  | 0.014 | 0.27  |
| CRISPLD1 | 4       | -0.8775357 | 4.07E-27 | 7.43E-23  | 0.105 | 0.551 |
| MT-CYB   | 4       | -0.8815357 | 4.75E-35 | 8.68E-31  | 0.855 | 0.946 |
| ZFP36L2  | 4       | -0.8913423 | 5.24E-24 | 9.57E-20  | 0.291 | 0.682 |
| RPS11    | 4       | -0.909619  | 5.02E-72 | 9.15E-68  | 0.995 | 1     |
| SLC40A1  | 4       | -0.9836826 | 8.79E-24 | 1.60E-19  | 0.264 | 0.676 |
| ADIRF    | 4       | -1.0168031 | 5.86E-35 | 1.07E-30  | 0.3   | 0.794 |
| RPS20    | 4       | -1.0318771 | 1.33E-76 | 2.42E-72  | 0.995 | 1     |
| CAPS     | 4       | -1.092489  | 1.28E-41 | 2.33E-37  | 0.732 | 0.993 |
| FRZB     | 4       | -1.1687865 | 1.72E-25 | 3.14E-21  | 0.336 | 0.743 |
| SPTSSB   | 4       | -1.215181  | 7.08E-38 | 1.29E-33  | 0.018 | 0.568 |
| gene     | cluster | avg_logFC  | p_val    | p_val_adj | pct.1 | pct.2 |
| SPP1     | 5       | 2.20204647 | 5.54E-55 | 1.01E-50  | 0.743 | 0.047 |
| PRG4     | 5       | 1.56580969 | 9.15E-40 | 1.67E-35  | 0.555 | 0.016 |
| COMP     | 5       | 1.46276481 | 2.08E-46 | 3.79E-42  | 0.991 | 0.559 |
| PLA2G2A  | 5       | 1.31326096 | 9.62E-31 | 1.76E-26  | 0.927 | 0.645 |
| CHI3L2   | 5       | 1.25618701 | 6.17E-42 | 1.13E-37  | 0.968 | 0.617 |
| SERPINE2 | 5       | 1.14660246 | 2.28E-32 | 4.16E-28  | 1     | 0.977 |
| VEGFA    | 5       | 1.13669235 | 3.17E-43 | 5.79E-39  | 0.862 | 0.316 |
| MT1G     | 5       | 1.13363874 | 8.10E-29 | 1.48E-24  | 0.977 | 0.91  |
| MT1H     | 5       | 1.07823018 | 6.75E-16 | 1.23E-11  | 0.789 | 0.539 |
| PTGS2    | 5       | 1.06780844 | 6.46E-34 | 1.18E-29  | 0.587 | 0.086 |
| MT2A     | 5       | 1.01222777 | 1.08E-19 | 1.97E-15  | 1     | 0.996 |
| TGFBI    | 5       | 0.96963357 | 1.54E-43 | 2.80E-39  | 0.67  | 0.066 |
| DDIT4L   | 5       | 0.96775159 | 7.84E-29 | 1.43E-24  | 0.917 | 0.57  |
| EPYC     | 5       | 0.91525966 | 3.37E-31 | 6.15E-27  | 0.573 | 0.094 |
| ADM      | 5       | 0.87543189 | 5.18E-18 | 9.45E-14  | 0.803 | 0.523 |

|           |   |            |          |            |       |       |
|-----------|---|------------|----------|------------|-------|-------|
| FN1       | 5 | 0.86803988 | 7.02E-44 | 1.28E-39   | 1     | 0.992 |
| S100A2    | 5 | 0.86149243 | 1.73E-19 | 3.16E-15   | 0.569 | 0.203 |
| CTSD      | 5 | 0.83951476 | 2.01E-16 | 3.67E-12   | 0.986 | 0.961 |
| CCDC85B   | 5 | 0.82703883 | 1.06E-23 | 1.94E-19   | 0.936 | 0.695 |
| MT1X      | 5 | 0.80460703 | 1.28E-18 | 2.33E-14   | 1     | 0.992 |
| CHI3L1    | 5 | 0.80090189 | 7.68E-19 | 1.40E-14   | 1     | 0.961 |
| STK17A    | 5 | 0.78814491 | 2.80E-19 | 5.10E-15   | 0.459 | 0.113 |
| SOD2      | 5 | 0.78688191 | 6.61E-20 | 1.21E-15   | 0.991 | 0.914 |
| CTHRC1    | 5 | 0.78392387 | 1.83E-32 | 3.34E-28   | 0.541 | 0.059 |
| PPP3CA    | 5 | 0.78104318 | 1.25E-29 | 2.29E-25   | 0.963 | 0.672 |
| C2orf40   | 5 | 0.73571698 | 7.68E-25 | 1.40E-20   | 1     | 1     |
| MRPS6     | 5 | 0.73275163 | 1.97E-14 | 3.60E-10   | 0.972 | 0.906 |
| BMP2      | 5 | 0.73106254 | 2.15E-21 | 3.92E-17   | 0.367 | 0.031 |
| ORM1      | 5 | 0.72912608 | 2.21E-07 | 0.00402701 | 0.427 | 0.215 |
| TMEM45A   | 5 | 0.7199251  | 9.83E-24 | 1.79E-19   | 0.95  | 0.801 |
| HILPDA    | 5 | 0.71914852 | 5.89E-16 | 1.07E-11   | 0.606 | 0.301 |
| IGFBP3    | 5 | 0.7118593  | 1.59E-16 | 2.91E-12   | 0.344 | 0.055 |
| TNFRSF12A | 5 | 0.70844126 | 3.82E-13 | 6.97E-09   | 0.413 | 0.145 |
| CA9       | 5 | 0.69454165 | 1.35E-23 | 2.47E-19   | 0.578 | 0.176 |
| WTAP      | 5 | 0.6917737  | 3.48E-19 | 6.35E-15   | 0.839 | 0.547 |
| DDIT3     | 5 | 0.69156973 | 4.37E-16 | 7.97E-12   | 0.679 | 0.367 |
| GAPDH     | 5 | 0.6831234  | 9.40E-16 | 1.72E-11   | 1     | 1     |
| UPP1      | 5 | 0.66800537 | 1.70E-20 | 3.10E-16   | 0.472 | 0.109 |
| FAM162A   | 5 | 0.65832493 | 7.48E-28 | 1.36E-23   | 0.982 | 0.836 |
| ERO1A     | 5 | 0.65733031 | 1.23E-18 | 2.25E-14   | 0.693 | 0.398 |
| MT1F      | 5 | 0.64608804 | 1.58E-13 | 2.89E-09   | 0.959 | 0.883 |
| TIMP1     | 5 | 0.6350791  | 1.78E-07 | 0.00324245 | 1     | 1     |
| SLC25A37  | 5 | 0.61864362 | 4.99E-18 | 9.10E-14   | 0.862 | 0.645 |
| ARRDC3    | 5 | 0.6134442  | 2.83E-13 | 5.16E-09   | 0.56  | 0.277 |
| AK2       | 5 | 0.60614052 | 8.46E-16 | 1.54E-11   | 0.784 | 0.598 |
| FOSL1     | 5 | 0.60497516 | 4.88E-17 | 8.91E-13   | 0.289 | 0.02  |
| WWP2      | 5 | 0.59372082 | 3.81E-18 | 6.96E-14   | 0.858 | 0.613 |
| BAALC     | 5 | 0.58981723 | 5.01E-21 | 9.13E-17   | 0.61  | 0.215 |
| PPP1CB    | 5 | 0.56028237 | 2.31E-15 | 4.22E-11   | 0.904 | 0.699 |
| PHLDA1    | 5 | 0.55903002 | 3.19E-18 | 5.82E-14   | 0.39  | 0.066 |
| CTSL      | 5 | 0.55784869 | 1.60E-06 | 0.02928454 | 0.628 | 0.465 |
| ANGPTL7   | 5 | 0.55583812 | 3.99E-12 | 7.27E-08   | 0.211 | 0.016 |
| EGR1      | 5 | 0.55057432 | 2.46E-11 | 4.48E-07   | 0.408 | 0.156 |
| PTP4A1    | 5 | 0.54779835 | 5.58E-11 | 1.02E-06   | 0.633 | 0.422 |

|          |   |            |          |            |       |       |
|----------|---|------------|----------|------------|-------|-------|
| BZW1     | 5 | 0.54573862 | 1.49E-13 | 2.72E-09   | 0.628 | 0.371 |
| DNER     | 5 | 0.53456592 | 7.08E-16 | 1.29E-11   | 0.633 | 0.309 |
| CYTL1    | 5 | 0.53188543 | 1.53E-09 | 2.80E-05   | 0.312 | 0.102 |
| RGCC     | 5 | 0.53059087 | 1.02E-10 | 1.86E-06   | 0.729 | 0.523 |
| SLC3A2   | 5 | 0.52586101 | 1.14E-08 | 0.00020778 | 0.491 | 0.281 |
| PMP22    | 5 | 0.52184164 | 1.02E-13 | 1.86E-09   | 0.826 | 0.641 |
| PDPN     | 5 | 0.52079179 | 2.28E-14 | 4.16E-10   | 0.679 | 0.352 |
| BTG1     | 5 | 0.51254013 | 1.37E-14 | 2.51E-10   | 0.995 | 0.988 |
| AEBP1    | 5 | 0.50760729 | 2.43E-13 | 4.43E-09   | 0.812 | 0.621 |
| RNF145   | 5 | 0.50084239 | 2.45E-15 | 4.48E-11   | 0.592 | 0.281 |
| ENO2     | 5 | 0.49640443 | 1.83E-14 | 3.34E-10   | 0.624 | 0.344 |
| C4orf48  | 5 | 0.49051008 | 6.00E-20 | 1.09E-15   | 0.495 | 0.121 |
| HLA-DRB1 | 5 | 0.48893164 | 2.40E-14 | 4.38E-10   | 0.495 | 0.195 |
| PTGDS    | 5 | 0.48372409 | 1.39E-10 | 2.54E-06   | 0.161 | 0.004 |
| CCDC80   | 5 | 0.4801615  | 2.84E-12 | 5.18E-08   | 0.995 | 0.973 |
| PDE4B    | 5 | 0.47947401 | 1.72E-21 | 3.14E-17   | 0.394 | 0.043 |
| C11orf96 | 5 | 0.46869215 | 9.71E-11 | 1.77E-06   | 0.294 | 0.074 |
| BHLHE40  | 5 | 0.45727603 | 1.16E-08 | 0.00021147 | 0.518 | 0.293 |
| ARF6     | 5 | 0.45462622 | 7.88E-12 | 1.44E-07   | 0.628 | 0.406 |
| CLK1     | 5 | 0.45331496 | 1.22E-14 | 2.23E-10   | 0.67  | 0.363 |
| TREM1    | 5 | 0.45224795 | 1.36E-22 | 2.49E-18   | 0.33  | 0.004 |
| GBE1     | 5 | 0.44935997 | 2.08E-09 | 3.80E-05   | 0.72  | 0.5   |
| CRLF1    | 5 | 0.44745163 | 1.42E-19 | 2.59E-15   | 0.399 | 0.059 |
| PPFIBP1  | 5 | 0.44640942 | 2.19E-12 | 3.99E-08   | 0.601 | 0.336 |
| EIF4EBP1 | 5 | 0.4452656  | 7.19E-07 | 0.01312308 | 0.532 | 0.371 |
| EGLN3    | 5 | 0.44506956 | 7.55E-12 | 1.38E-07   | 0.413 | 0.141 |
| SLC2A1   | 5 | 0.43930717 | 2.02E-10 | 3.68E-06   | 0.394 | 0.156 |
| ADAMTS6  | 5 | 0.43731462 | 7.39E-12 | 1.35E-07   | 0.275 | 0.051 |
| CDK5RAP2 | 5 | 0.43070952 | 7.98E-08 | 0.00145527 | 0.326 | 0.137 |
| SPRY2    | 5 | 0.43001532 | 3.64E-15 | 6.65E-11   | 0.349 | 0.066 |
| ISG20    | 5 | 0.42778375 | 4.02E-09 | 7.33E-05   | 0.615 | 0.383 |
| INSIG2   | 5 | 0.4261906  | 1.68E-09 | 3.07E-05   | 0.711 | 0.531 |
| TPD52    | 5 | 0.42515022 | 4.42E-13 | 8.06E-09   | 0.853 | 0.68  |
| ATP6V1G1 | 5 | 0.42242998 | 2.34E-19 | 4.26E-15   | 0.995 | 0.969 |
| ZNF385D  | 5 | 0.41740223 | 6.78E-12 | 1.24E-07   | 0.711 | 0.461 |
| CRTAC1   | 5 | 0.41733234 | 1.68E-19 | 3.07E-15   | 0.385 | 0.055 |
| DNAJB9   | 5 | 0.41295092 | 1.69E-08 | 0.00030911 | 0.748 | 0.598 |
| NDRG1    | 5 | 0.41227806 | 1.22E-08 | 0.00022301 | 0.573 | 0.363 |
| IER3     | 5 | 0.41199681 | 3.01E-09 | 5.50E-05   | 0.275 | 0.074 |

|               |   |            |          |            |       |       |
|---------------|---|------------|----------|------------|-------|-------|
| NOVA1         | 5 | 0.40644717 | 3.08E-08 | 0.00056142 | 0.945 | 0.898 |
| CFD           | 5 | 0.39737016 | 1.04E-07 | 0.00189481 | 0.349 | 0.137 |
| SGIP1         | 5 | 0.39543148 | 3.54E-20 | 6.47E-16   | 0.298 | 0.004 |
| VAPA          | 5 | 0.39209691 | 4.42E-13 | 8.07E-09   | 0.931 | 0.867 |
| IFITM3        | 5 | 0.38857117 | 5.11E-11 | 9.32E-07   | 0.95  | 0.832 |
| NAMPT         | 5 | 0.38811267 | 2.79E-12 | 5.10E-08   | 0.665 | 0.383 |
| ERRFI1        | 5 | 0.38699551 | 5.56E-08 | 0.00101438 | 0.376 | 0.168 |
| GPX1          | 5 | 0.38660758 | 6.82E-12 | 1.25E-07   | 0.908 | 0.781 |
| MTHFD2        | 5 | 0.38558805 | 3.35E-10 | 6.11E-06   | 0.78  | 0.57  |
| STK26         | 5 | 0.38552421 | 1.86E-10 | 3.39E-06   | 0.509 | 0.254 |
| SRGN          | 5 | 0.38503732 | 3.83E-12 | 6.99E-08   | 0.463 | 0.18  |
| MIF           | 5 | 0.38095178 | 2.94E-20 | 5.36E-16   | 1     | 1     |
| RAB1A         | 5 | 0.38011535 | 2.41E-09 | 4.39E-05   | 0.835 | 0.73  |
| RNMT          | 5 | 0.37518657 | 3.78E-10 | 6.89E-06   | 0.564 | 0.32  |
| NRP2          | 5 | 0.37483037 | 5.52E-15 | 1.01E-10   | 0.307 | 0.043 |
| ABI3BP        | 5 | 0.37033045 | 4.10E-10 | 7.48E-06   | 0.569 | 0.301 |
| IFRD1         | 5 | 0.36906405 | 1.94E-07 | 0.00353443 | 0.67  | 0.523 |
| RP11-125O18.1 | 5 | 0.36897942 | 9.67E-13 | 1.76E-08   | 0.358 | 0.094 |
| PPP1R15A      | 5 | 0.36872883 | 8.84E-10 | 1.61E-05   | 0.399 | 0.168 |
| WDR45B        | 5 | 0.36737719 | 2.16E-08 | 0.00039493 | 0.459 | 0.258 |
| SLC25A36      | 5 | 0.36405735 | 2.08E-10 | 3.80E-06   | 0.706 | 0.453 |
| CSGALNACT2    | 5 | 0.36104276 | 7.38E-09 | 0.00013466 | 0.349 | 0.145 |
| NT5C3A        | 5 | 0.36045258 | 2.35E-08 | 0.00042889 | 0.376 | 0.172 |
| EMP3          | 5 | 0.35817679 | 1.51E-10 | 2.76E-06   | 0.927 | 0.785 |
| GLRX          | 5 | 0.35297516 | 1.11E-08 | 0.0002032  | 0.417 | 0.191 |
| AVPI1         | 5 | 0.35090912 | 2.68E-08 | 0.00048976 | 0.399 | 0.188 |
| SLC39A8       | 5 | 0.34789392 | 3.35E-10 | 6.11E-06   | 0.514 | 0.262 |
| NPR3          | 5 | 0.34235268 | 1.36E-15 | 2.48E-11   | 0.225 | 0     |
| XBP1          | 5 | 0.33716585 | 1.03E-06 | 0.01875627 | 0.716 | 0.59  |
| TSHZ2         | 5 | 0.33621588 | 5.69E-14 | 1.04E-09   | 0.294 | 0.043 |
| RABGGTB       | 5 | 0.33613106 | 1.78E-10 | 3.24E-06   | 0.78  | 0.57  |
| IL11          | 5 | 0.3351914  | 2.87E-10 | 5.23E-06   | 0.156 | 0.004 |
| PHPT1         | 5 | 0.33104773 | 1.47E-09 | 2.69E-05   | 0.812 | 0.711 |
| PLA2G4A       | 5 | 0.32822014 | 5.39E-09 | 9.84E-05   | 0.436 | 0.211 |
| DDX41         | 5 | 0.32720027 | 3.78E-09 | 6.90E-05   | 0.326 | 0.113 |
| SAR1A         | 5 | 0.32190023 | 7.11E-08 | 0.00129729 | 0.633 | 0.434 |
| CD55          | 5 | 0.32102503 | 1.64E-06 | 0.02996667 | 0.587 | 0.418 |
| RAB13         | 5 | 0.32033436 | 3.62E-09 | 6.61E-05   | 0.899 | 0.797 |
| CLIC4         | 5 | 0.31702845 | 4.62E-08 | 0.00084368 | 0.573 | 0.363 |



|          |   |            |          |            |       |       |
|----------|---|------------|----------|------------|-------|-------|
| PID1     | 5 | 0.31448877 | 8.75E-07 | 0.0159571  | 0.573 | 0.391 |
| MED21    | 5 | 0.31403017 | 9.99E-08 | 0.00182314 | 0.518 | 0.316 |
| NOL7     | 5 | 0.31123063 | 2.20E-06 | 0.04013819 | 0.596 | 0.434 |
| COX17    | 5 | 0.30964527 | 7.53E-08 | 0.00137473 | 0.83  | 0.672 |
| RND3     | 5 | 0.30960566 | 1.80E-07 | 0.00327667 | 0.22  | 0.059 |
| SCOC     | 5 | 0.30781549 | 1.56E-08 | 0.00028391 | 0.661 | 0.488 |
| PGK1     | 5 | 0.30496819 | 1.58E-06 | 0.02881022 | 0.959 | 0.934 |
| VDAC1    | 5 | 0.30378323 | 8.64E-08 | 0.00157723 | 0.876 | 0.77  |
| NDUFC1   | 5 | 0.30306007 | 1.25E-09 | 2.29E-05   | 0.94  | 0.863 |
| PAM      | 5 | 0.30044432 | 1.28E-06 | 0.02343703 | 0.72  | 0.617 |
| CD68     | 5 | 0.29720689 | 1.01E-08 | 0.00018461 | 0.628 | 0.387 |
| SMIM15   | 5 | 0.29557524 | 5.78E-07 | 0.01054041 | 0.532 | 0.355 |
| ATP6V0E1 | 5 | 0.29512026 | 3.46E-08 | 0.00063065 | 0.931 | 0.859 |
| KLF3     | 5 | 0.29421377 | 1.13E-06 | 0.0205279  | 0.39  | 0.207 |
| ARF4     | 5 | 0.29382246 | 6.85E-07 | 0.01249722 | 0.798 | 0.711 |
| HNRNPDL  | 5 | 0.29165547 | 1.85E-07 | 0.0033718  | 0.835 | 0.664 |
| CD44     | 5 | 0.29056493 | 1.99E-10 | 3.63E-06   | 0.927 | 0.766 |
| SMIM3    | 5 | 0.29055746 | 2.69E-11 | 4.90E-07   | 0.289 | 0.062 |
| C4orf3   | 5 | 0.28999049 | 4.96E-11 | 9.05E-07   | 1     | 0.988 |
| MRPL17   | 5 | 0.28957339 | 2.08E-06 | 0.03799412 | 0.514 | 0.328 |
| WSB1     | 5 | 0.28906355 | 7.32E-08 | 0.00133524 | 0.913 | 0.797 |
| A4GALT   | 5 | 0.2883601  | 7.21E-16 | 1.32E-11   | 0.239 | 0.004 |
| FAM210A  | 5 | 0.28680938 | 2.84E-08 | 0.00051851 | 0.362 | 0.152 |
| SAMD4A   | 5 | 0.28452065 | 3.49E-08 | 0.00063672 | 0.376 | 0.164 |
| PLAUR    | 5 | 0.28452065 | 2.57E-06 | 0.04691856 | 0.358 | 0.188 |
| CCND1    | 5 | 0.28313733 | 9.26E-16 | 1.69E-11   | 0.266 | 0.016 |
| IFITM10  | 5 | 0.27771943 | 4.61E-07 | 0.00841077 | 0.33  | 0.148 |
| CDKN1A   | 5 | 0.27731929 | 1.63E-07 | 0.00297778 | 0.298 | 0.109 |
| SNRPG    | 5 | 0.27533062 | 7.29E-07 | 0.01330921 | 0.789 | 0.645 |
| CALD1    | 5 | 0.27497988 | 2.83E-07 | 0.00517279 | 0.679 | 0.457 |
| EPS8     | 5 | 0.27401107 | 9.10E-10 | 1.66E-05   | 0.39  | 0.148 |
| RELB     | 5 | 0.27375953 | 2.56E-09 | 4.68E-05   | 0.298 | 0.09  |
| ATP6V1C1 | 5 | 0.27335554 | 8.06E-07 | 0.01470598 | 0.427 | 0.234 |
| RNF126   | 5 | 0.27275112 | 2.75E-10 | 5.01E-06   | 0.431 | 0.172 |
| C11orf31 | 5 | 0.27078573 | 7.30E-08 | 0.00133288 | 0.803 | 0.688 |
| GPRC5A   | 5 | 0.26880724 | 1.82E-07 | 0.00331433 | 0.303 | 0.117 |
| SUMO3    | 5 | 0.26692163 | 9.70E-07 | 0.0177082  | 0.651 | 0.461 |
| BCAT1    | 5 | 0.26687243 | 2.56E-07 | 0.00467072 | 0.661 | 0.453 |
| BNIP3    | 5 | 0.26477256 | 2.29E-07 | 0.00417605 | 0.995 | 0.996 |

|              |   |            |          |            |       |       |
|--------------|---|------------|----------|------------|-------|-------|
| LY6E         | 5 | 0.26422306 | 4.18E-07 | 0.00762604 | 0.638 | 0.43  |
| ZFYVE16      | 5 | 0.2636672  | 1.30E-10 | 2.38E-06   | 0.381 | 0.129 |
| NOP10        | 5 | 0.26282746 | 2.40E-06 | 0.04386329 | 0.826 | 0.688 |
| IFT22        | 5 | 0.26189228 | 3.34E-07 | 0.00609806 | 0.472 | 0.262 |
| ZNF593       | 5 | 0.25698561 | 1.92E-06 | 0.03500985 | 0.518 | 0.32  |
| SLC20A1      | 5 | 0.25662368 | 6.10E-09 | 0.00011128 | 0.307 | 0.098 |
| RARRES3      | 5 | -0.2505134 | 3.16E-08 | 0.00057659 | 0.06  | 0.242 |
| UBB          | 5 | -0.2509453 | 7.45E-07 | 0.01358643 | 0.798 | 0.922 |
| FAU          | 5 | -0.252174  | 1.29E-20 | 2.36E-16   | 1     | 1     |
| EDF1         | 5 | -0.2530547 | 8.82E-09 | 0.00016097 | 0.936 | 0.992 |
| RPL32        | 5 | -0.253966  | 3.59E-26 | 6.54E-22   | 1     | 1     |
| DNM3OS       | 5 | -0.2541432 | 1.33E-06 | 0.02421328 | 0.275 | 0.48  |
| CD302        | 5 | -0.2552267 | 4.63E-09 | 8.45E-05   | 0.151 | 0.387 |
| RPL24        | 5 | -0.2553976 | 1.57E-20 | 2.86E-16   | 1     | 1     |
| ENPP1        | 5 | -0.2558734 | 4.37E-07 | 0.00798233 | 0.174 | 0.379 |
| BRK1         | 5 | -0.2563844 | 8.04E-08 | 0.00146734 | 0.812 | 0.938 |
| MTDH         | 5 | -0.2568311 | 8.51E-07 | 0.01552329 | 0.573 | 0.738 |
| SLC38A1      | 5 | -0.2568748 | 1.03E-07 | 0.00188246 | 0.193 | 0.41  |
| FMOD         | 5 | -0.2579898 | 5.04E-08 | 0.0009204  | 0.977 | 0.996 |
| EPB41L4A-AS1 | 5 | -0.2584149 | 2.45E-07 | 0.00447671 | 0.766 | 0.91  |
| NUCB2        | 5 | -0.2586142 | 6.72E-07 | 0.01225344 | 0.399 | 0.617 |
| RPL6         | 5 | -0.2594889 | 1.05E-17 | 1.91E-13   | 1     | 1     |
| CIRBP        | 5 | -0.2595126 | 3.16E-08 | 0.00057598 | 1     | 1     |
| BGN          | 5 | -0.2615898 | 1.66E-07 | 0.00302755 | 0.995 | 1     |
| RPL12        | 5 | -0.2624919 | 9.30E-18 | 1.70E-13   | 1     | 1     |
| ATP5A1       | 5 | -0.2632773 | 2.56E-06 | 0.04671125 | 0.472 | 0.645 |
| MZT2B        | 5 | -0.2648951 | 5.33E-10 | 9.73E-06   | 0.931 | 0.992 |
| RPS15        | 5 | -0.2656435 | 1.09E-24 | 1.99E-20   | 1     | 1     |
| TOMM20       | 5 | -0.2672556 | 1.38E-08 | 0.00025145 | 0.798 | 0.949 |
| RBM3         | 5 | -0.2680096 | 6.45E-07 | 0.01176112 | 0.5   | 0.656 |
| RGS10        | 5 | -0.2687519 | 2.39E-06 | 0.04353921 | 0.463 | 0.641 |
| NCOR1        | 5 | -0.2701005 | 2.41E-07 | 0.00438915 | 0.179 | 0.375 |
| MPST         | 5 | -0.2712253 | 1.83E-07 | 0.00333407 | 0.307 | 0.52  |
| ARPC1B       | 5 | -0.271513  | 1.77E-07 | 0.00323556 | 0.22  | 0.438 |
| CDKN2C       | 5 | -0.2736507 | 1.15E-10 | 2.10E-06   | 0.096 | 0.34  |
| SNHG8        | 5 | -0.2754434 | 7.45E-08 | 0.00135884 | 0.835 | 0.953 |
| PRCP         | 5 | -0.2760353 | 2.01E-09 | 3.67E-05   | 0.142 | 0.379 |
| GNB2L1       | 5 | -0.2772619 | 1.73E-16 | 3.16E-12   | 1     | 1     |
| SCG5         | 5 | -0.2774329 | 6.74E-08 | 0.00123011 | 0.046 | 0.215 |

|            |   |            |          |            |       |       |
|------------|---|------------|----------|------------|-------|-------|
| EIF3F      | 5 | -0.2778306 | 4.17E-08 | 0.00076005 | 0.794 | 0.922 |
| AC003090.1 | 5 | -0.2779643 | 1.85E-09 | 3.38E-05   | 0.124 | 0.355 |
| PLP2       | 5 | -0.2793351 | 2.00E-07 | 0.00364731 | 0.651 | 0.82  |
| C14orf166  | 5 | -0.2804553 | 6.90E-08 | 0.00125882 | 0.688 | 0.824 |
| RPS24      | 5 | -0.2820384 | 1.92E-20 | 3.50E-16   | 1     | 1     |
| IDH2       | 5 | -0.2820541 | 2.51E-09 | 4.58E-05   | 0.087 | 0.301 |
| NBEAL1     | 5 | -0.2832915 | 3.52E-11 | 6.43E-07   | 0.977 | 0.996 |
| RAC1       | 5 | -0.2844826 | 8.85E-11 | 1.61E-06   | 0.876 | 0.973 |
| PTMS       | 5 | -0.2853432 | 4.64E-08 | 0.00084757 | 0.583 | 0.773 |
| RPS14      | 5 | -0.286134  | 1.81E-32 | 3.31E-28   | 1     | 1     |
| ATP5D      | 5 | -0.2869708 | 5.27E-09 | 9.62E-05   | 0.821 | 0.938 |
| RPS4Y1     | 5 | -0.2908288 | 2.18E-15 | 3.99E-11   | 0.991 | 0.996 |
| COX7C      | 5 | -0.2918437 | 4.04E-17 | 7.37E-13   | 1     | 1     |
| YBX1       | 5 | -0.2926634 | 8.14E-13 | 1.48E-08   | 0.963 | 0.992 |
| CLDN11     | 5 | -0.2929321 | 2.50E-12 | 4.56E-08   | 0.018 | 0.242 |
| PPIC       | 5 | -0.2930495 | 5.39E-07 | 0.00983678 | 0.339 | 0.582 |
| RSPO3      | 5 | -0.2950149 | 1.75E-11 | 3.20E-07   | 0.005 | 0.199 |
| SLC44A1    | 5 | -0.2957028 | 8.96E-08 | 0.00163571 | 0.211 | 0.414 |
| CUTA       | 5 | -0.2958089 | 1.76E-07 | 0.00321111 | 0.757 | 0.891 |
| KDEL2      | 5 | -0.296263  | 5.76E-07 | 0.01051196 | 0.803 | 0.91  |
| MYL12B     | 5 | -0.2966078 | 6.83E-08 | 0.00124616 | 0.486 | 0.66  |
| C10orf107  | 5 | -0.2969685 | 2.66E-13 | 4.86E-09   | 0.028 | 0.273 |
| GSTP1      | 5 | -0.2984149 | 1.04E-10 | 1.90E-06   | 0.931 | 0.973 |
| MATN4      | 5 | -0.2986849 | 3.99E-07 | 0.00728384 | 0.206 | 0.426 |
| BEX2       | 5 | -0.301423  | 2.68E-08 | 0.00048873 | 0.239 | 0.465 |
| MRAP2      | 5 | -0.3019411 | 2.72E-12 | 4.96E-08   | 0.009 | 0.223 |
| AHNAK      | 5 | -0.3038029 | 1.16E-07 | 0.0021134  | 0.317 | 0.535 |
| HSP90AB1   | 5 | -0.3069893 | 6.99E-09 | 0.00012747 | 0.936 | 0.969 |
| RPS4X      | 5 | -0.3074635 | 1.15E-28 | 2.11E-24   | 1     | 1     |
| RPL36AL    | 5 | -0.3091696 | 2.96E-16 | 5.39E-12   | 0.995 | 1     |
| EIF3D      | 5 | -0.3095602 | 3.39E-08 | 0.00061911 | 0.697 | 0.824 |
| C19orf43   | 5 | -0.3108007 | 1.12E-10 | 2.04E-06   | 0.752 | 0.918 |
| SEP1       | 5 | -0.3116334 | 9.98E-10 | 1.82E-05   | 0.202 | 0.445 |
| PSAP       | 5 | -0.3119773 | 5.21E-09 | 9.50E-05   | 0.94  | 0.965 |
| SDF4       | 5 | -0.3126939 | 6.35E-09 | 0.00011583 | 0.697 | 0.859 |
| TTC3       | 5 | -0.3127245 | 1.71E-08 | 0.00031114 | 0.697 | 0.863 |
| RABAC1     | 5 | -0.3131945 | 8.94E-11 | 1.63E-06   | 0.775 | 0.906 |
| ATP5L      | 5 | -0.3141118 | 6.85E-11 | 1.25E-06   | 0.927 | 0.969 |
| RPL28      | 5 | -0.3150448 | 1.33E-29 | 2.44E-25   | 1     | 1     |

|         |   |            |          |            |       |       |
|---------|---|------------|----------|------------|-------|-------|
| RPS3    | 5 | -0.3173534 | 6.11E-34 | 1.12E-29   | 1     | 1     |
| RPL5    | 5 | -0.3177204 | 2.19E-21 | 4.00E-17   | 1     | 1     |
| FHL1    | 5 | -0.3181556 | 2.99E-07 | 0.00545101 | 0.326 | 0.535 |
| CCNG1   | 5 | -0.3183772 | 4.72E-08 | 0.00086153 | 0.5   | 0.668 |
| SLC25A6 | 5 | -0.3185541 | 1.65E-12 | 3.01E-08   | 0.963 | 0.992 |
| SPINT2  | 5 | -0.3187519 | 2.29E-10 | 4.18E-06   | 0.321 | 0.613 |
| CYSTM1  | 5 | -0.3202903 | 3.37E-08 | 0.00061442 | 0.404 | 0.617 |
| RPA3    | 5 | -0.3221117 | 5.74E-10 | 1.05E-05   | 0.459 | 0.695 |
| RPL26   | 5 | -0.3227072 | 5.52E-32 | 1.01E-27   | 1     | 1     |
| TIMP2   | 5 | -0.3228603 | 6.40E-09 | 0.00011681 | 0.518 | 0.727 |
| CYBRD1  | 5 | -0.3237826 | 9.28E-10 | 1.69E-05   | 0.427 | 0.688 |
| CHID1   | 5 | -0.3263593 | 3.30E-09 | 6.03E-05   | 0.587 | 0.762 |
| RPS28   | 5 | -0.3280129 | 5.77E-38 | 1.05E-33   | 1     | 1     |
| RPS9    | 5 | -0.3282228 | 5.67E-32 | 1.03E-27   | 1     | 1     |
| EIF2S3  | 5 | -0.3287866 | 5.83E-08 | 0.00106457 | 0.495 | 0.684 |
| MALAT1  | 5 | -0.3288264 | 4.65E-09 | 8.48E-05   | 1     | 1     |
| LDHB    | 5 | -0.3292114 | 2.09E-11 | 3.82E-07   | 0.697 | 0.898 |
| IGBP1   | 5 | -0.3293401 | 6.92E-09 | 0.00012632 | 0.573 | 0.738 |
| RPL15   | 5 | -0.3293496 | 1.54E-41 | 2.82E-37   | 1     | 1     |
| RPL7A   | 5 | -0.3297765 | 7.05E-29 | 1.29E-24   | 1     | 1     |
| PSMA7   | 5 | -0.3302696 | 1.53E-10 | 2.80E-06   | 0.729 | 0.938 |
| HTR2A   | 5 | -0.3310785 | 1.16E-09 | 2.12E-05   | 0.041 | 0.242 |
| EIF3E   | 5 | -0.3319009 | 2.93E-16 | 5.35E-12   | 1     | 1     |
| PRDX6   | 5 | -0.332526  | 4.06E-10 | 7.42E-06   | 0.752 | 0.898 |
| EIF3M   | 5 | -0.3346391 | 2.90E-11 | 5.30E-07   | 0.477 | 0.754 |
| BSG     | 5 | -0.3386489 | 2.91E-11 | 5.32E-07   | 0.674 | 0.875 |
| COMMD6  | 5 | -0.3386871 | 3.58E-18 | 6.54E-14   | 0.991 | 1     |
| CCDC8   | 5 | -0.3416326 | 7.06E-12 | 1.29E-07   | 0.078 | 0.332 |
| ANGPTL5 | 5 | -0.3473224 | 1.21E-09 | 2.20E-05   | 0.252 | 0.492 |
| LRRC2   | 5 | -0.348561  | 2.04E-10 | 3.71E-06   | 0.151 | 0.398 |
| CEBPD   | 5 | -0.348644  | 2.05E-06 | 0.03731718 | 0.757 | 0.91  |
| DBP     | 5 | -0.3494236 | 1.97E-07 | 0.00358628 | 0.243 | 0.426 |
| RPS19   | 5 | -0.3500337 | 1.16E-33 | 2.11E-29   | 1     | 1     |
| GPX3    | 5 | -0.350896  | 4.22E-08 | 0.00077069 | 0.936 | 0.984 |
| ST13    | 5 | -0.3551938 | 5.84E-15 | 1.07E-10   | 0.931 | 0.98  |
| HERPUD1 | 5 | -0.3566792 | 9.96E-10 | 1.82E-05   | 0.413 | 0.66  |
| SSPN    | 5 | -0.357416  | 2.55E-09 | 4.65E-05   | 0.206 | 0.445 |
| RPS21   | 5 | -0.3575507 | 1.71E-27 | 3.12E-23   | 1     | 1     |
| RPS12   | 5 | -0.3595792 | 6.27E-32 | 1.14E-27   | 1     | 1     |

|          |   |            |          |            |       |       |
|----------|---|------------|----------|------------|-------|-------|
| CPE      | 5 | -0.3622033 | 2.60E-09 | 4.74E-05   | 0.628 | 0.777 |
| RPL3     | 5 | -0.3650636 | 3.37E-32 | 6.16E-28   | 1     | 1     |
| HDLBP    | 5 | -0.365156  | 5.54E-11 | 1.01E-06   | 0.45  | 0.676 |
| GLTSCR2  | 5 | -0.3677544 | 1.10E-14 | 2.01E-10   | 0.894 | 0.996 |
| MYL6     | 5 | -0.3678428 | 3.38E-14 | 6.17E-10   | 0.904 | 0.965 |
| TXNIP    | 5 | -0.3696934 | 1.37E-15 | 2.49E-11   | 0.06  | 0.363 |
| ARL2BP   | 5 | -0.371305  | 1.52E-11 | 2.78E-07   | 0.39  | 0.672 |
| ZNF90    | 5 | -0.3718641 | 2.65E-10 | 4.83E-06   | 0.399 | 0.652 |
| BTF3     | 5 | -0.3740072 | 2.65E-24 | 4.84E-20   | 0.991 | 1     |
| PCBP2    | 5 | -0.3751354 | 9.37E-15 | 1.71E-10   | 0.899 | 0.984 |
| RPS15A   | 5 | -0.3763323 | 3.48E-39 | 6.34E-35   | 1     | 1     |
| RPL27    | 5 | -0.3794955 | 4.64E-28 | 8.46E-24   | 1     | 1     |
| H3F3A    | 5 | -0.3802289 | 7.05E-18 | 1.29E-13   | 0.954 | 0.996 |
| NDUFA11  | 5 | -0.3817073 | 9.24E-15 | 1.69E-10   | 0.826 | 0.957 |
| RPL35    | 5 | -0.3817919 | 2.24E-38 | 4.08E-34   | 1     | 1     |
| ATP5O    | 5 | -0.3855678 | 1.95E-14 | 3.57E-10   | 0.706 | 0.887 |
| RPS6     | 5 | -0.3866819 | 6.75E-48 | 1.23E-43   | 1     | 1     |
| MFG8     | 5 | -0.3875956 | 3.02E-09 | 5.51E-05   | 0.83  | 0.941 |
| PPT1     | 5 | -0.3885143 | 1.34E-12 | 2.45E-08   | 0.339 | 0.625 |
| ATP5G2   | 5 | -0.3901779 | 3.62E-21 | 6.61E-17   | 0.995 | 0.996 |
| RPS25    | 5 | -0.3942113 | 7.39E-43 | 1.35E-38   | 1     | 1     |
| TCF4     | 5 | -0.3962679 | 2.26E-08 | 0.00041218 | 0.353 | 0.547 |
| SERPINI1 | 5 | -0.3967332 | 2.52E-07 | 0.00460432 | 0.151 | 0.344 |
| NFIA     | 5 | -0.3969193 | 5.45E-13 | 9.94E-09   | 0.229 | 0.527 |
| EIF3K    | 5 | -0.3971867 | 1.15E-15 | 2.09E-11   | 0.766 | 0.922 |
| RPL27A   | 5 | -0.3973213 | 5.10E-44 | 9.30E-40   | 1     | 1     |
| HIST1H4C | 5 | -0.3989334 | 5.67E-10 | 1.03E-05   | 0.353 | 0.609 |
| ATRNL1   | 5 | -0.4031088 | 2.13E-14 | 3.88E-10   | 0.092 | 0.387 |
| PPIA     | 5 | -0.4034345 | 9.15E-20 | 1.67E-15   | 0.972 | 0.992 |
| RPL11    | 5 | -0.4040788 | 1.71E-46 | 3.12E-42   | 1     | 1     |
| KHDRBS3  | 5 | -0.4052346 | 4.45E-18 | 8.12E-14   | 0.028 | 0.348 |
| CD99     | 5 | -0.4092387 | 1.15E-19 | 2.10E-15   | 0.972 | 0.996 |
| UQCRH    | 5 | -0.411521  | 7.47E-21 | 1.36E-16   | 0.931 | 0.992 |
| LGALS1   | 5 | -0.4122834 | 3.58E-10 | 6.53E-06   | 0.922 | 0.98  |
| RPL13    | 5 | -0.412381  | 6.74E-50 | 1.23E-45   | 1     | 1     |
| ZBTB20   | 5 | -0.4131668 | 6.23E-14 | 1.14E-09   | 0.271 | 0.574 |
| PLPP1    | 5 | -0.4136439 | 3.00E-11 | 5.47E-07   | 0.101 | 0.348 |
| RPL22    | 5 | -0.4140658 | 2.47E-36 | 4.52E-32   | 1     | 1     |
| SSR2     | 5 | -0.4220078 | 4.49E-19 | 8.19E-15   | 0.78  | 0.969 |

|         |   |            |          |            |       |       |
|---------|---|------------|----------|------------|-------|-------|
| ZFAS1   | 5 | -0.4248878 | 7.24E-23 | 1.32E-18   | 0.991 | 1     |
| HNRNPA1 | 5 | -0.4262724 | 2.26E-19 | 4.12E-15   | 0.986 | 0.996 |
| RPS27   | 5 | -0.4266338 | 7.26E-50 | 1.32E-45   | 1     | 1     |
| RPL39   | 5 | -0.4295598 | 1.56E-36 | 2.85E-32   | 1     | 1     |
| HINT1   | 5 | -0.4297408 | 2.08E-20 | 3.79E-16   | 0.959 | 0.984 |
| HOXC10  | 5 | -0.4334894 | 4.97E-12 | 9.07E-08   | 0.633 | 0.789 |
| RPL35A  | 5 | -0.4340461 | 1.15E-47 | 2.10E-43   | 1     | 1     |
| UBA52   | 5 | -0.4344446 | 3.68E-42 | 6.72E-38   | 1     | 1     |
| ITM2A   | 5 | -0.4347976 | 8.24E-10 | 1.50E-05   | 0.528 | 0.742 |
| RPL37A  | 5 | -0.43547   | 2.42E-52 | 4.42E-48   | 1     | 1     |
| APOD    | 5 | -0.4365645 | 5.85E-10 | 1.07E-05   | 0.239 | 0.508 |
| RPL29   | 5 | -0.4372156 | 5.66E-43 | 1.03E-38   | 1     | 1     |
| RPS7    | 5 | -0.4383321 | 1.38E-38 | 2.51E-34   | 1     | 1     |
| TOMM7   | 5 | -0.4387809 | 1.50E-42 | 2.73E-38   | 1     | 1     |
| GAS6    | 5 | -0.4389387 | 4.85E-14 | 8.86E-10   | 0.349 | 0.648 |
| RPS2    | 5 | -0.4401219 | 1.09E-48 | 1.98E-44   | 1     | 1     |
| SLC25A3 | 5 | -0.4405061 | 4.24E-18 | 7.73E-14   | 0.826 | 0.965 |
| GNAS    | 5 | -0.4415567 | 1.18E-17 | 2.16E-13   | 0.431 | 0.785 |
| ISLR    | 5 | -0.4422585 | 2.06E-11 | 3.75E-07   | 0.376 | 0.625 |
| MT-ND4  | 5 | -0.4460265 | 2.88E-10 | 5.25E-06   | 0.972 | 0.953 |
| RPLP1   | 5 | -0.4472734 | 1.32E-49 | 2.41E-45   | 1     | 1     |
| DSEL    | 5 | -0.4496728 | 1.58E-11 | 2.89E-07   | 0.151 | 0.418 |
| NPM1    | 5 | -0.4520817 | 9.89E-26 | 1.80E-21   | 1     | 1     |
| C2orf82 | 5 | -0.4539907 | 3.06E-15 | 5.58E-11   | 0.977 | 1     |
| PTRF    | 5 | -0.4556324 | 1.61E-14 | 2.94E-10   | 0.33  | 0.617 |
| RPS18   | 5 | -0.4584906 | 1.60E-49 | 2.92E-45   | 1     | 1     |
| RPL19   | 5 | -0.4605431 | 1.41E-55 | 2.58E-51   | 1     | 1     |
| RPL9    | 5 | -0.4610925 | 8.71E-50 | 1.59E-45   | 1     | 1     |
| RPS23   | 5 | -0.46207   | 2.59E-51 | 4.72E-47   | 1     | 1     |
| RPL21   | 5 | -0.464387  | 2.69E-57 | 4.92E-53   | 1     | 1     |
| RPL37   | 5 | -0.4645586 | 3.49E-45 | 6.37E-41   | 1     | 1     |
| COL9A3  | 5 | -0.467353  | 3.55E-14 | 6.48E-10   | 0.826 | 0.934 |
| RPS5    | 5 | -0.4679462 | 1.01E-45 | 1.84E-41   | 1     | 1     |
| OXA1L   | 5 | -0.4681195 | 5.60E-18 | 1.02E-13   | 0.394 | 0.734 |
| PABPC1  | 5 | -0.4683487 | 1.57E-19 | 2.86E-15   | 0.862 | 0.98  |
| EIF2A   | 5 | -0.4705894 | 7.08E-17 | 1.29E-12   | 0.679 | 0.852 |
| RPL8    | 5 | -0.4747944 | 1.28E-50 | 2.34E-46   | 1     | 1     |
| PEBP1   | 5 | -0.4748489 | 1.57E-18 | 2.86E-14   | 0.748 | 0.953 |
| COL2A1  | 5 | -0.4760485 | 9.31E-09 | 0.00016997 | 0.725 | 0.93  |

|          |   |            |          |          |       |       |
|----------|---|------------|----------|----------|-------|-------|
| UQCRB    | 5 | -0.4769521 | 1.57E-25 | 2.87E-21 | 0.972 | 1     |
| CRIP2    | 5 | -0.4769977 | 1.36E-12 | 2.48E-08 | 0.225 | 0.5   |
| RPSA     | 5 | -0.4789152 | 8.88E-35 | 1.62E-30 | 1     | 1     |
| PDIA6    | 5 | -0.4797697 | 8.03E-17 | 1.46E-12 | 0.651 | 0.895 |
| RPL18A   | 5 | -0.4808532 | 5.64E-53 | 1.03E-48 | 1     | 1     |
| RHOBTB3  | 5 | -0.4816212 | 1.37E-16 | 2.50E-12 | 0.683 | 0.898 |
| NNMT     | 5 | -0.482387  | 5.82E-15 | 1.06E-10 | 0.839 | 0.98  |
| HLA-B    | 5 | -0.4832876 | 4.48E-17 | 8.18E-13 | 0.693 | 0.918 |
| RPL13A   | 5 | -0.4872999 | 3.44E-58 | 6.28E-54 | 1     | 1     |
| RPL10    | 5 | -0.4878635 | 4.35E-55 | 7.93E-51 | 1     | 1     |
| SLC14A1  | 5 | -0.4924246 | 6.21E-13 | 1.13E-08 | 0.257 | 0.527 |
| RPL14    | 5 | -0.4925911 | 6.45E-48 | 1.18E-43 | 1     | 1     |
| HLA-A    | 5 | -0.4969344 | 2.58E-17 | 4.71E-13 | 0.904 | 0.988 |
| RPL31    | 5 | -0.4997112 | 9.77E-49 | 1.78E-44 | 1     | 1     |
| PLXDC2   | 5 | -0.5035108 | 2.78E-16 | 5.07E-12 | 0.541 | 0.805 |
| HLA-C    | 5 | -0.5084519 | 1.93E-17 | 3.52E-13 | 0.826 | 0.965 |
| PRUNE2   | 5 | -0.5106231 | 1.31E-14 | 2.39E-10 | 0.298 | 0.629 |
| RPS13    | 5 | -0.5144991 | 2.91E-55 | 5.31E-51 | 1     | 1     |
| NAP1L1   | 5 | -0.5194776 | 1.94E-27 | 3.54E-23 | 0.94  | 0.984 |
| SEC11A   | 5 | -0.5205498 | 1.22E-23 | 2.23E-19 | 0.761 | 0.941 |
| RPS27A   | 5 | -0.5216722 | 1.72E-60 | 3.14E-56 | 1     | 1     |
| MT-CO3   | 5 | -0.52852   | 7.65E-12 | 1.40E-07 | 0.922 | 0.934 |
| EEF1B2   | 5 | -0.5311863 | 1.19E-32 | 2.17E-28 | 0.945 | 1     |
| RPL30    | 5 | -0.5313954 | 1.57E-55 | 2.87E-51 | 1     | 1     |
| RPL23    | 5 | -0.5407421 | 7.58E-44 | 1.38E-39 | 1     | 1     |
| CCDC102B | 5 | -0.5455941 | 1.90E-25 | 3.46E-21 | 0.041 | 0.465 |
| MT-ND1   | 5 | -0.5551073 | 1.20E-12 | 2.20E-08 | 0.518 | 0.781 |
| MT-ATP6  | 5 | -0.5596617 | 1.03E-12 | 1.87E-08 | 0.807 | 0.898 |
| RPL23A   | 5 | -0.5602615 | 1.75E-62 | 3.19E-58 | 1     | 1     |
| RPS29    | 5 | -0.562032  | 4.12E-58 | 7.51E-54 | 1     | 1     |
| EIF4B    | 5 | -0.5759665 | 9.06E-26 | 1.65E-21 | 0.803 | 0.961 |
| RPLP2    | 5 | -0.5797397 | 7.39E-63 | 1.35E-58 | 1     | 1     |
| TUBB     | 5 | -0.587079  | 1.70E-23 | 3.09E-19 | 0.601 | 0.922 |
| NPC2     | 5 | -0.5878319 | 3.58E-33 | 6.54E-29 | 0.963 | 1     |
| RPL4     | 5 | -0.5891077 | 9.55E-45 | 1.74E-40 | 1     | 1     |
| RPL34    | 5 | -0.5896377 | 6.15E-61 | 1.12E-56 | 1     | 1     |
| MT-CO2   | 5 | -0.5937187 | 7.53E-14 | 1.37E-09 | 0.936 | 0.965 |
| INHBA    | 5 | -0.598278  | 1.63E-17 | 2.97E-13 | 0.225 | 0.59  |
| VIM      | 5 | -0.598863  | 3.90E-28 | 7.13E-24 | 1     | 1     |

|          |   |            |          |          |       |       |
|----------|---|------------|----------|----------|-------|-------|
| MT-CO1   | 5 | -0.6003683 | 3.88E-13 | 7.09E-09 | 0.963 | 0.969 |
| EIF3L    | 5 | -0.6069107 | 4.99E-31 | 9.10E-27 | 0.771 | 0.996 |
| XAGE2    | 5 | -0.6086714 | 1.68E-10 | 3.06E-06 | 0.009 | 0.191 |
| ZFP36L2  | 5 | -0.6087268 | 3.23E-16 | 5.90E-12 | 0.151 | 0.48  |
| TPT1     | 5 | -0.6108689 | 3.70E-57 | 6.76E-53 | 1     | 1     |
| RPL18    | 5 | -0.6183312 | 2.40E-61 | 4.39E-57 | 1     | 1     |
| RPS3A    | 5 | -0.6193799 | 4.58E-66 | 8.36E-62 | 1     | 1     |
| RPL10A   | 5 | -0.619507  | 1.08E-54 | 1.97E-50 | 1     | 1     |
| YBX3     | 5 | -0.623334  | 2.25E-30 | 4.10E-26 | 0.812 | 0.984 |
| CTGF     | 5 | -0.6431579 | 4.38E-16 | 8.00E-12 | 0.261 | 0.617 |
| SLC40A1  | 5 | -0.6471443 | 1.01E-16 | 1.85E-12 | 0.119 | 0.453 |
| HIST1H1C | 5 | -0.648858  | 5.00E-11 | 9.13E-07 | 0.271 | 0.531 |
| RPL7     | 5 | -0.6512818 | 3.25E-56 | 5.93E-52 | 1     | 1     |
| RPS17    | 5 | -0.6520849 | 2.05E-60 | 3.75E-56 | 1     | 1     |
| RPS16    | 5 | -0.6574506 | 1.32E-65 | 2.41E-61 | 1     | 1     |
| RPS8     | 5 | -0.6638292 | 1.27E-63 | 2.32E-59 | 1     | 1     |
| EEF2     | 5 | -0.6694624 | 1.56E-33 | 2.85E-29 | 1     | 1     |
| CITED2   | 5 | -0.677483  | 1.80E-21 | 3.29E-17 | 0.271 | 0.684 |
| CCNI     | 5 | -0.678491  | 2.43E-44 | 4.43E-40 | 0.995 | 1     |
| P4HB     | 5 | -0.6933203 | 1.51E-30 | 2.76E-26 | 0.789 | 0.977 |
| EEF1A1   | 5 | -0.6948047 | 1.26E-62 | 2.30E-58 | 1     | 1     |
| SSR3     | 5 | -0.7272031 | 9.92E-32 | 1.81E-27 | 0.807 | 0.973 |
| NEAT1    | 5 | -0.728996  | 2.22E-35 | 4.06E-31 | 1     | 1     |
| MT-CYB   | 5 | -0.7412196 | 6.15E-20 | 1.12E-15 | 0.656 | 0.875 |
| MT-ND2   | 5 | -0.7609417 | 4.34E-15 | 7.91E-11 | 0.619 | 0.785 |
| B2M      | 5 | -0.7645681 | 5.13E-46 | 9.35E-42 | 1     | 1     |
| CHRD2    | 5 | -0.7848787 | 1.41E-17 | 2.57E-13 | 0.394 | 0.719 |
| CLEC3A   | 5 | -0.790828  | 3.50E-17 | 6.39E-13 | 0.693 | 0.906 |
| SPARC    | 5 | -0.8077599 | 1.84E-28 | 3.36E-24 | 0.39  | 0.832 |
| PAX1     | 5 | -0.8209689 | 1.79E-29 | 3.27E-25 | 0.528 | 0.875 |
| FTH1     | 5 | -0.8243489 | 6.77E-54 | 1.24E-49 | 1     | 1     |
| EIF3H    | 5 | -0.8389578 | 1.25E-55 | 2.28E-51 | 0.963 | 1     |
| RPLP0    | 5 | -0.8452373 | 2.75E-70 | 5.01E-66 | 1     | 1     |
| CRTAP    | 5 | -0.8467567 | 2.45E-49 | 4.48E-45 | 0.495 | 0.969 |
| CAPS     | 5 | -0.8563313 | 1.16E-27 | 2.11E-23 | 0.716 | 0.953 |
| CD9      | 5 | -0.8590509 | 1.81E-36 | 3.30E-32 | 0.372 | 0.828 |
| CFH      | 5 | -0.859149  | 4.77E-15 | 8.71E-11 | 0.183 | 0.512 |
| MT-ND3   | 5 | -0.8858117 | 1.81E-22 | 3.30E-18 | 0.647 | 0.871 |
| ACTG1    | 5 | -0.8858735 | 6.48E-39 | 1.18E-34 | 0.881 | 0.988 |



| GREM1    | 5       | -0.9488709 | 4.02E-21 | 7.33E-17   | 0.115 | 0.52  |
|----------|---------|------------|----------|------------|-------|-------|
| OGN      | 5       | -0.9769744 | 4.58E-29 | 8.35E-25   | 0.908 | 0.988 |
| RPS11    | 5       | -1.0523182 | 6.52E-74 | 1.19E-69   | 0.995 | 1     |
| RPS20    | 5       | -1.0548791 | 4.79E-75 | 8.74E-71   | 1     | 1     |
| CRISPLD1 | 5       | -1.1355991 | 1.06E-34 | 1.93E-30   | 0.183 | 0.707 |
| ADIRF    | 5       | -1.2935023 | 6.57E-48 | 1.20E-43   | 0.289 | 0.895 |
| SPTSSB   | 5       | -1.9345241 | 3.47E-67 | 6.34E-63   | 0.041 | 0.875 |
| FRZB     | 5       | -1.9827525 | 5.14E-63 | 9.37E-59   | 0.739 | 0.992 |
| gene     | cluster | avg_logFC  | p_val    | p_val_adj  | pct.1 | pct.2 |
| SPP1     | 6       | 2.40594361 | 1.42E-23 | 2.60E-19   | 0.749 | 0.131 |
| BMP2     | 6       | 1.49056394 | 9.71E-27 | 1.77E-22   | 0.733 | 0.071 |
| PLA2G2A  | 6       | 1.46193036 | 3.00E-16 | 5.48E-12   | 0.712 | 0.253 |
| PHLDA1   | 6       | 1.44057551 | 1.45E-20 | 2.64E-16   | 0.691 | 0.141 |
| PRG4     | 6       | 1.41856484 | 1.66E-20 | 3.03E-16   | 0.617 | 0.051 |
| TGFB1    | 6       | 1.38413386 | 2.78E-21 | 5.07E-17   | 0.745 | 0.222 |
| FOSL1    | 6       | 1.31136251 | 1.28E-12 | 2.33E-08   | 0.56  | 0.162 |
| CHI3L2   | 6       | 1.22546307 | 2.27E-24 | 4.14E-20   | 0.901 | 0.455 |
| VEGFA    | 6       | 1.20734118 | 3.87E-28 | 7.06E-24   | 0.926 | 0.434 |
| PTGS2    | 6       | 1.19728382 | 1.60E-25 | 2.92E-21   | 0.728 | 0.071 |
| MRPS6    | 6       | 1.16168897 | 4.72E-22 | 8.62E-18   | 0.988 | 0.909 |
| COMP     | 6       | 1.11750329 | 4.12E-15 | 7.51E-11   | 0.947 | 0.687 |
| CTHRC1   | 6       | 1.08760386 | 1.28E-22 | 2.33E-18   | 0.663 | 0.061 |
| IL11     | 6       | 1.07501647 | 2.23E-13 | 4.07E-09   | 0.403 | 0     |
| MT2A     | 6       | 1.06891995 | 6.72E-17 | 1.23E-12   | 1     | 1     |
| STK17A   | 6       | 1.05435835 | 4.14E-21 | 7.56E-17   | 0.819 | 0.323 |
| CCDC85B  | 6       | 1.04381369 | 2.17E-20 | 3.96E-16   | 0.975 | 0.788 |
| CTSL     | 6       | 1.04321293 | 1.80E-12 | 3.28E-08   | 0.831 | 0.535 |
| MT1X     | 6       | 0.96169082 | 5.01E-13 | 9.14E-09   | 0.996 | 0.98  |
| IGFBP3   | 6       | 0.93703017 | 6.82E-14 | 1.24E-09   | 0.683 | 0.253 |
| CTSD     | 6       | 0.92232911 | 6.54E-08 | 0.00119325 | 0.979 | 0.939 |
| UPP1     | 6       | 0.86200401 | 2.52E-17 | 4.60E-13   | 0.745 | 0.253 |
| DDIT4L   | 6       | 0.85813334 | 1.22E-17 | 2.23E-13   | 0.914 | 0.525 |
| PPP3CA   | 6       | 0.83935796 | 1.98E-16 | 3.61E-12   | 0.942 | 0.667 |
| ARRDC3   | 6       | 0.8291378  | 4.80E-15 | 8.76E-11   | 0.741 | 0.323 |
| IGFBP5   | 6       | 0.8024681  | 5.09E-08 | 0.00092922 | 0.469 | 0.172 |
| WTAP     | 6       | 0.78220389 | 3.70E-16 | 6.76E-12   | 0.889 | 0.556 |
| MT1G     | 6       | 0.77866989 | 4.00E-07 | 0.00729131 | 0.955 | 0.919 |
| SOD2     | 6       | 0.77187271 | 3.71E-15 | 6.76E-11   | 0.988 | 0.869 |
| CA9      | 6       | 0.7665561  | 6.33E-12 | 1.15E-07   | 0.691 | 0.333 |

|           |   |            |          |            |       |       |
|-----------|---|------------|----------|------------|-------|-------|
| HILPDA    | 6 | 0.76604189 | 2.20E-11 | 4.01E-07   | 0.593 | 0.212 |
| TREM1     | 6 | 0.7487921  | 1.19E-16 | 2.16E-12   | 0.494 | 0.01  |
| EIF4A2    | 6 | 0.73935327 | 1.52E-19 | 2.78E-15   | 0.979 | 0.889 |
| ENO2      | 6 | 0.73602951 | 3.87E-16 | 7.06E-12   | 0.765 | 0.364 |
| TNFRSF12A | 6 | 0.73233041 | 9.20E-14 | 1.68E-09   | 0.914 | 0.616 |
| ERO1A     | 6 | 0.72864572 | 4.45E-13 | 8.11E-09   | 0.786 | 0.444 |
| PMP22     | 6 | 0.70399159 | 3.65E-16 | 6.67E-12   | 0.955 | 0.707 |
| EPYC      | 6 | 0.70100671 | 7.41E-11 | 1.35E-06   | 0.453 | 0.081 |
| NRN1      | 6 | 0.69705812 | 4.82E-08 | 0.00087866 | 0.675 | 0.414 |
| SLC25A37  | 6 | 0.69061873 | 1.23E-14 | 2.24E-10   | 0.918 | 0.646 |
| SLC5A3    | 6 | 0.68549754 | 1.22E-10 | 2.22E-06   | 0.807 | 0.566 |
| RABGGTB   | 6 | 0.65624784 | 1.47E-17 | 2.69E-13   | 0.827 | 0.364 |
| EGLN3     | 6 | 0.65393902 | 3.38E-13 | 6.16E-09   | 0.547 | 0.121 |
| SMOX      | 6 | 0.64530065 | 2.70E-11 | 4.92E-07   | 0.695 | 0.333 |
| ISG20     | 6 | 0.63663144 | 3.00E-16 | 5.48E-12   | 0.848 | 0.364 |
| HLA-DRB1  | 6 | 0.62605851 | 7.40E-11 | 1.35E-06   | 0.58  | 0.222 |
| ANGPTL4   | 6 | 0.59810363 | 2.96E-07 | 0.00539418 | 0.44  | 0.162 |
| TNFSF11   | 6 | 0.59271278 | 7.41E-11 | 1.35E-06   | 0.35  | 0.01  |
| SERPINE2  | 6 | 0.59125907 | 1.21E-09 | 2.20E-05   | 1     | 1     |
| GAPDH     | 6 | 0.5912441  | 6.48E-12 | 1.18E-07   | 1     | 1     |
| FAM162A   | 6 | 0.58801526 | 3.37E-16 | 6.16E-12   | 0.984 | 0.838 |
| C11orf96  | 6 | 0.58534503 | 2.77E-09 | 5.05E-05   | 0.461 | 0.111 |
| CFD       | 6 | 0.58449663 | 1.58E-07 | 0.00288601 | 0.329 | 0.061 |
| TMEM45A   | 6 | 0.58144319 | 2.31E-11 | 4.22E-07   | 0.947 | 0.778 |
| SPRY2     | 6 | 0.57835624 | 3.12E-13 | 5.69E-09   | 0.654 | 0.212 |
| AK2       | 6 | 0.57676373 | 3.50E-10 | 6.39E-06   | 0.852 | 0.667 |
| BTG1      | 6 | 0.57532791 | 8.77E-17 | 1.60E-12   | 0.992 | 0.909 |
| EPS8      | 6 | 0.57425029 | 7.50E-14 | 1.37E-09   | 0.667 | 0.232 |
| IFRD1     | 6 | 0.56939398 | 3.39E-10 | 6.19E-06   | 0.695 | 0.404 |
| NT5C3A    | 6 | 0.56107431 | 3.06E-11 | 5.58E-07   | 0.523 | 0.152 |
| PPFIBP1   | 6 | 0.55100373 | 1.73E-11 | 3.15E-07   | 0.765 | 0.455 |
| INSIG2    | 6 | 0.54777619 | 1.65E-09 | 3.01E-05   | 0.774 | 0.525 |
| BNIP3     | 6 | 0.54511779 | 2.89E-15 | 5.28E-11   | 1     | 0.99  |
| PPP1CB    | 6 | 0.53878362 | 1.90E-07 | 0.00346867 | 0.877 | 0.717 |
| HMGA2     | 6 | 0.53487278 | 6.99E-14 | 1.27E-09   | 0.477 | 0.04  |
| VAPA      | 6 | 0.53065515 | 1.02E-14 | 1.87E-10   | 0.975 | 0.859 |
| PDE4B     | 6 | 0.52464277 | 2.50E-12 | 4.55E-08   | 0.547 | 0.141 |
| SERPINE1  | 6 | 0.5241989  | 2.76E-08 | 0.00050296 | 0.539 | 0.212 |
| GBE1      | 6 | 0.51883578 | 1.06E-07 | 0.0019273  | 0.774 | 0.596 |

|          |   |            |          |            |       |       |
|----------|---|------------|----------|------------|-------|-------|
| PTP4A1   | 6 | 0.51623425 | 5.24E-09 | 9.57E-05   | 0.716 | 0.444 |
| BZW1     | 6 | 0.51553891 | 2.71E-11 | 4.95E-07   | 0.881 | 0.616 |
| PPP1R15A | 6 | 0.50095419 | 6.68E-09 | 0.00012197 | 0.58  | 0.263 |
| DDIT3    | 6 | 0.49672102 | 6.27E-08 | 0.00114423 | 0.757 | 0.505 |
| ARF6     | 6 | 0.49487595 | 2.78E-10 | 5.07E-06   | 0.815 | 0.606 |
| ADM      | 6 | 0.48835277 | 3.07E-08 | 0.00056034 | 0.848 | 0.586 |
| CLK1     | 6 | 0.48657814 | 4.67E-09 | 8.53E-05   | 0.63  | 0.323 |
| EVI2A    | 6 | 0.48118428 | 1.00E-11 | 1.83E-07   | 0.44  | 0.061 |
| SLC2A1   | 6 | 0.4806899  | 5.76E-07 | 0.01051596 | 0.506 | 0.232 |
| NTMT1    | 6 | 0.46127181 | 9.41E-11 | 1.72E-06   | 0.621 | 0.263 |
| WDR45B   | 6 | 0.45908239 | 5.62E-10 | 1.03E-05   | 0.605 | 0.253 |
| PTGES3   | 6 | 0.4568895  | 2.78E-14 | 5.08E-10   | 0.988 | 0.909 |
| DDX41    | 6 | 0.4516712  | 6.87E-07 | 0.01254254 | 0.428 | 0.162 |
| SGIP1    | 6 | 0.44782279 | 1.96E-09 | 3.57E-05   | 0.395 | 0.071 |
| SRGN     | 6 | 0.44685304 | 1.06E-07 | 0.00194257 | 0.457 | 0.162 |
| WSB1     | 6 | 0.44470561 | 6.99E-08 | 0.00127581 | 0.848 | 0.667 |
| BAALC    | 6 | 0.44143585 | 1.02E-06 | 0.01863393 | 0.683 | 0.424 |
| SMIM3    | 6 | 0.43278292 | 1.67E-10 | 3.05E-06   | 0.473 | 0.111 |
| VDAC1    | 6 | 0.43262109 | 3.56E-09 | 6.50E-05   | 0.93  | 0.788 |
| S100A2   | 6 | 0.4280955  | 5.85E-09 | 0.00010673 | 0.835 | 0.505 |
| RGS2     | 6 | 0.42381425 | 8.74E-07 | 0.01594476 | 0.63  | 0.354 |
| WDR33    | 6 | 0.42148052 | 2.44E-07 | 0.00444346 | 0.605 | 0.333 |
| A4GALT   | 6 | 0.42124685 | 1.37E-10 | 2.51E-06   | 0.399 | 0.051 |
| CD55     | 6 | 0.41992663 | 4.90E-07 | 0.00895011 | 0.712 | 0.434 |
| PHF1     | 6 | 0.41828521 | 7.46E-09 | 0.00013611 | 0.584 | 0.253 |
| PLAUR    | 6 | 0.40856565 | 1.29E-06 | 0.02353243 | 0.634 | 0.343 |
| ARPP19   | 6 | 0.40690314 | 6.61E-09 | 0.00012068 | 0.753 | 0.465 |
| NRP2     | 6 | 0.39828094 | 1.65E-07 | 0.00301484 | 0.444 | 0.152 |
| ZNF385D  | 6 | 0.39235929 | 3.39E-08 | 0.00061903 | 0.724 | 0.485 |
| MIF      | 6 | 0.39112131 | 1.91E-16 | 3.49E-12   | 1     | 1     |
| RNF126   | 6 | 0.38607392 | 9.76E-07 | 0.01781561 | 0.498 | 0.232 |
| GRB10    | 6 | 0.38516853 | 4.45E-08 | 0.00081273 | 0.3   | 0.03  |
| RELB     | 6 | 0.37685726 | 2.39E-07 | 0.00436501 | 0.37  | 0.101 |
| NAMPT    | 6 | 0.37502408 | 1.06E-06 | 0.01926249 | 0.63  | 0.384 |
| ADSS     | 6 | 0.3682976  | 2.31E-06 | 0.04217703 | 0.724 | 0.475 |
| SLC39A8  | 6 | 0.36751629 | 4.67E-08 | 0.00085125 | 0.519 | 0.212 |
| FN1      | 6 | 0.36498321 | 6.17E-08 | 0.0011264  | 1     | 1     |
| CLDND1   | 6 | 0.36283745 | 1.29E-07 | 0.00236297 | 0.63  | 0.354 |
| PLA2G4A  | 6 | 0.36101335 | 9.18E-09 | 0.00016746 | 0.469 | 0.141 |

|              |   |            |          |            |       |       |
|--------------|---|------------|----------|------------|-------|-------|
| COX17        | 6 | 0.36070721 | 3.07E-08 | 0.00056037 | 0.897 | 0.677 |
| NDRG1        | 6 | 0.35712287 | 5.85E-08 | 0.00106687 | 0.811 | 0.535 |
| LTBP1        | 6 | 0.35482138 | 7.74E-10 | 1.41E-05   | 0.342 | 0.02  |
| HMGA1        | 6 | 0.35482138 | 1.47E-08 | 0.00026912 | 0.7   | 0.384 |
| TSHZ2        | 6 | 0.34174929 | 4.67E-08 | 0.00085197 | 0.251 | 0     |
| SNHG12       | 6 | 0.34137058 | 2.59E-06 | 0.04730113 | 0.514 | 0.232 |
| LINC00493    | 6 | 0.33702016 | 2.96E-07 | 0.00540177 | 0.901 | 0.707 |
| CD44         | 6 | 0.33015265 | 2.66E-06 | 0.04860608 | 0.918 | 0.697 |
| SLC25A11     | 6 | 0.32767039 | 7.24E-07 | 0.01321166 | 0.527 | 0.242 |
| RORA         | 6 | 0.32583384 | 6.57E-07 | 0.0119871  | 0.593 | 0.323 |
| SELK         | 6 | 0.32063001 | 2.23E-06 | 0.04065016 | 0.914 | 0.747 |
| EMP3         | 6 | 0.32038552 | 6.44E-07 | 0.01174391 | 0.992 | 0.919 |
| FOXA3        | 6 | 0.31220679 | 2.71E-06 | 0.04940793 | 0.342 | 0.091 |
| PTGES        | 6 | 0.30905693 | 2.45E-08 | 0.00044717 | 0.259 | 0     |
| YWHAE        | 6 | 0.30810008 | 2.30E-06 | 0.04192041 | 0.955 | 0.869 |
| ZFYVE16      | 6 | 0.30245339 | 1.73E-07 | 0.00314795 | 0.391 | 0.101 |
| SPHK1        | 6 | 0.29873191 | 1.27E-06 | 0.02309001 | 0.366 | 0.111 |
| ATP6V1C1     | 6 | 0.2903534  | 2.47E-06 | 0.04498368 | 0.56  | 0.283 |
| CHMP4B       | 6 | 0.28616301 | 1.06E-06 | 0.01928055 | 0.77  | 0.475 |
| CYGB         | 6 | 0.2595112  | 2.25E-06 | 0.04113698 | 0.333 | 0.081 |
| TNS1         | 6 | 0.25750417 | 1.19E-06 | 0.02178929 | 0.379 | 0.111 |
| RPL13        | 6 | -0.2524994 | 6.94E-14 | 1.27E-09   | 1     | 1     |
| ENPP1        | 6 | -0.2525851 | 3.05E-07 | 0.00557113 | 0.14  | 0.384 |
| RPL6         | 6 | -0.2547448 | 1.24E-08 | 0.00022624 | 1     | 1     |
| RPS25        | 6 | -0.2565442 | 1.59E-09 | 2.90E-05   | 1     | 1     |
| SERTAD4-AS1  | 6 | -0.2586674 | 5.22E-09 | 9.53E-05   | 0.086 | 0.343 |
| RP11-71N10.1 | 6 | -0.2588616 | 3.05E-11 | 5.57E-07   | 0.033 | 0.273 |
| RPS15A       | 6 | -0.2601775 | 1.98E-09 | 3.61E-05   | 1     | 1     |
| IDH1         | 6 | -0.2602615 | 2.31E-08 | 0.00042068 | 0.074 | 0.303 |
| HOXB8        | 6 | -0.2628378 | 3.91E-09 | 7.14E-05   | 0.033 | 0.232 |
| COMMD6       | 6 | -0.2649401 | 5.98E-08 | 0.00109098 | 0.996 | 1     |
| RPS4X        | 6 | -0.2661394 | 1.62E-11 | 2.95E-07   | 1     | 1     |
| MBTPS1       | 6 | -0.2669717 | 1.71E-09 | 3.12E-05   | 0.091 | 0.354 |
| DPYSL3       | 6 | -0.2669717 | 5.07E-09 | 9.25E-05   | 0.078 | 0.323 |
| RPS27        | 6 | -0.2673307 | 2.81E-09 | 5.12E-05   | 1     | 1     |
| ISM1         | 6 | -0.2688464 | 1.16E-07 | 0.00211898 | 0.045 | 0.232 |
| HS3ST1       | 6 | -0.2688733 | 2.84E-07 | 0.0051752  | 0.086 | 0.303 |
| SCD          | 6 | -0.2693329 | 4.24E-07 | 0.0077299  | 0.099 | 0.313 |
| MPP6         | 6 | -0.2693329 | 2.14E-07 | 0.00391099 | 0.156 | 0.404 |

|          |   |            |          |            |       |       |
|----------|---|------------|----------|------------|-------|-------|
| TMEM160  | 6 | -0.2701772 | 1.49E-06 | 0.02720327 | 0.185 | 0.424 |
| RPL14    | 6 | -0.2720081 | 5.76E-11 | 1.05E-06   | 1     | 1     |
| OSBPL9   | 6 | -0.2768668 | 3.59E-07 | 0.00654951 | 0.144 | 0.384 |
| ITGA11   | 6 | -0.2842586 | 2.87E-07 | 0.00524554 | 0.091 | 0.303 |
| COX7C    | 6 | -0.2856196 | 2.47E-09 | 4.51E-05   | 0.996 | 1     |
| RPL12    | 6 | -0.2878356 | 5.44E-12 | 9.92E-08   | 1     | 1     |
| CTDNEP1  | 6 | -0.2879093 | 1.53E-07 | 0.00278411 | 0.206 | 0.475 |
| RPL19    | 6 | -0.289172  | 2.54E-16 | 4.64E-12   | 1     | 1     |
| SPINT2   | 6 | -0.2940255 | 6.49E-07 | 0.01183411 | 0.342 | 0.626 |
| RPS6     | 6 | -0.2982121 | 1.06E-15 | 1.93E-11   | 1     | 1     |
| DSEL     | 6 | -0.2987262 | 1.52E-06 | 0.02770212 | 0.074 | 0.263 |
| C12orf57 | 6 | -0.2988234 | 1.89E-07 | 0.00345488 | 0.947 | 0.98  |
| RPN1     | 6 | -0.3007584 | 1.54E-07 | 0.00280559 | 0.132 | 0.374 |
| RPL27A   | 6 | -0.3013637 | 6.54E-14 | 1.19E-09   | 1     | 1     |
| GSTP1    | 6 | -0.3020497 | 6.67E-08 | 0.00121778 | 0.979 | 0.99  |
| TSPAN5   | 6 | -0.3020933 | 5.16E-08 | 0.00094155 | 0.123 | 0.374 |
| RPS7     | 6 | -0.3022026 | 3.06E-14 | 5.58E-10   | 1     | 1     |
| RPS5     | 6 | -0.3028586 | 6.82E-13 | 1.24E-08   | 1     | 1     |
| SLC25A3  | 6 | -0.3042703 | 1.22E-06 | 0.02224138 | 0.864 | 0.98  |
| FMOD     | 6 | -0.3048418 | 7.23E-07 | 0.01320088 | 0.926 | 0.99  |
| CKAP4    | 6 | -0.3062639 | 3.07E-07 | 0.00560555 | 0.218 | 0.485 |
| TOMM7    | 6 | -0.3092514 | 4.71E-11 | 8.59E-07   | 1     | 1     |
| RPL22    | 6 | -0.3098838 | 1.70E-09 | 3.11E-05   | 1     | 1     |
| BTF3     | 6 | -0.3121911 | 2.12E-08 | 0.00038669 | 0.984 | 0.99  |
| MAF      | 6 | -0.3122803 | 7.08E-08 | 0.00129146 | 0.14  | 0.394 |
| COL14A1  | 6 | -0.312591  | 7.88E-10 | 1.44E-05   | 0.012 | 0.192 |
| KDELR3   | 6 | -0.3136332 | 1.61E-09 | 2.94E-05   | 0.16  | 0.465 |
| MYEOV2   | 6 | -0.314055  | 9.29E-07 | 0.01695399 | 0.683 | 0.889 |
| SSPN     | 6 | -0.3167123 | 1.20E-06 | 0.02184476 | 0.198 | 0.434 |
| ARL2     | 6 | -0.3179241 | 1.92E-06 | 0.03503971 | 0.37  | 0.616 |
| DCN      | 6 | -0.3184923 | 1.16E-06 | 0.02125626 | 1     | 1     |
| FTL      | 6 | -0.3186723 | 1.86E-09 | 3.40E-05   | 1     | 1     |
| RPS24    | 6 | -0.3202791 | 1.05E-11 | 1.92E-07   | 1     | 1     |
| NME2     | 6 | -0.321462  | 1.02E-06 | 0.01861447 | 0.222 | 0.455 |
| TMEM219  | 6 | -0.3227915 | 1.34E-06 | 0.02451691 | 0.646 | 0.798 |
| CHCHD2   | 6 | -0.323497  | 3.81E-09 | 6.95E-05   | 0.963 | 1     |
| RPL29    | 6 | -0.3259024 | 1.50E-15 | 2.74E-11   | 1     | 1     |
| FXVD6    | 6 | -0.3275003 | 1.53E-08 | 0.00027868 | 0.778 | 0.96  |
| EDF1     | 6 | -0.3288471 | 9.34E-10 | 1.70E-05   | 0.942 | 0.99  |

|           |   |            |          |            |       |       |
|-----------|---|------------|----------|------------|-------|-------|
| RPS19     | 6 | -0.3307851 | 8.11E-13 | 1.48E-08   | 1     | 1     |
| ATP5E     | 6 | -0.3309541 | 1.00E-09 | 1.83E-05   | 0.992 | 1     |
| ATRNL1    | 6 | -0.3310265 | 7.19E-09 | 0.00013117 | 0.123 | 0.384 |
| EIF4B     | 6 | -0.3317033 | 1.38E-06 | 0.02526193 | 0.72  | 0.879 |
| NENF      | 6 | -0.3323556 | 5.90E-07 | 0.01075769 | 0.93  | 0.939 |
| RPS21     | 6 | -0.332934  | 4.91E-10 | 8.96E-06   | 1     | 1     |
| SLC44A1   | 6 | -0.3349302 | 1.62E-06 | 0.02963485 | 0.206 | 0.434 |
| GREM1     | 6 | -0.3353333 | 6.12E-07 | 0.01116719 | 0.029 | 0.182 |
| AP2M1     | 6 | -0.3377429 | 2.45E-06 | 0.04474167 | 0.514 | 0.697 |
| RPL18A    | 6 | -0.3397199 | 1.47E-15 | 2.69E-11   | 1     | 1     |
| HNRNPA2B1 | 6 | -0.3400766 | 1.48E-06 | 0.02709387 | 0.494 | 0.727 |
| NBEAL1    | 6 | -0.3402223 | 4.98E-09 | 9.08E-05   | 0.979 | 0.99  |
| DMKN      | 6 | -0.3419216 | 2.64E-07 | 0.00481042 | 0.313 | 0.586 |
| RPL35     | 6 | -0.3426136 | 7.14E-15 | 1.30E-10   | 1     | 1     |
| TCEB2     | 6 | -0.3426504 | 1.75E-07 | 0.00320179 | 0.971 | 0.99  |
| TXN       | 6 | -0.3428665 | 1.15E-06 | 0.02093868 | 0.852 | 0.96  |
| RPL3      | 6 | -0.343877  | 1.90E-14 | 3.47E-10   | 1     | 1     |
| MRC2      | 6 | -0.345873  | 1.13E-09 | 2.07E-05   | 0.193 | 0.505 |
| PPIA      | 6 | -0.3494418 | 4.23E-10 | 7.72E-06   | 0.963 | 0.97  |
| SSR2      | 6 | -0.3524304 | 1.39E-09 | 2.54E-05   | 0.823 | 0.949 |
| LRP10     | 6 | -0.3530104 | 4.50E-07 | 0.00821126 | 0.317 | 0.566 |
| MLEC      | 6 | -0.3548077 | 8.83E-07 | 0.01610732 | 0.333 | 0.576 |
| C14orf1   | 6 | -0.3556173 | 1.37E-08 | 0.00025003 | 0.206 | 0.495 |
| PRKCDBP   | 6 | -0.357374  | 1.37E-06 | 0.02493631 | 0.37  | 0.606 |
| SLC38A1   | 6 | -0.3584607 | 2.64E-11 | 4.81E-07   | 0.173 | 0.515 |
| RPS13     | 6 | -0.3596299 | 4.75E-14 | 8.66E-10   | 1     | 1     |
| RPL37A    | 6 | -0.3602386 | 2.18E-18 | 3.97E-14   | 1     | 1     |
| RPL31     | 6 | -0.3608184 | 1.13E-14 | 2.05E-10   | 1     | 1     |
| RPL9      | 6 | -0.3658967 | 1.76E-16 | 3.21E-12   | 1     | 1     |
| NFIA      | 6 | -0.3666374 | 2.59E-08 | 0.00047212 | 0.173 | 0.444 |
| RPL21     | 6 | -0.3683846 | 2.51E-18 | 4.57E-14   | 1     | 1     |
| TTC3      | 6 | -0.3688625 | 1.55E-07 | 0.00282285 | 0.609 | 0.828 |
| ZBTB20    | 6 | -0.3692981 | 6.72E-09 | 0.00012257 | 0.202 | 0.495 |
| ERGIC3    | 6 | -0.3695296 | 2.74E-07 | 0.00500583 | 0.802 | 0.869 |
| RPL10     | 6 | -0.3698007 | 5.94E-19 | 1.08E-14   | 1     | 1     |
| COX6C     | 6 | -0.3701184 | 5.77E-07 | 0.01052469 | 0.852 | 0.949 |
| SRP14     | 6 | -0.3709529 | 6.04E-11 | 1.10E-06   | 0.988 | 0.99  |
| PRDX5     | 6 | -0.3729313 | 1.27E-11 | 2.32E-07   | 0.877 | 0.97  |
| RPL8      | 6 | -0.3762298 | 7.42E-23 | 1.35E-18   | 1     | 1     |

|           |   |            |          |            |       |       |
|-----------|---|------------|----------|------------|-------|-------|
| EID1      | 6 | -0.377605  | 1.51E-09 | 2.76E-05   | 0.93  | 0.97  |
| RPL39     | 6 | -0.3782852 | 2.36E-15 | 4.31E-11   | 1     | 1     |
| CTSK      | 6 | -0.3785045 | 1.54E-08 | 0.00028157 | 0.243 | 0.515 |
| HNRNPA1   | 6 | -0.378762  | 1.11E-08 | 0.00020283 | 0.988 | 0.98  |
| HLA-B     | 6 | -0.379622  | 1.50E-07 | 0.00273575 | 0.778 | 0.929 |
| BEX2      | 6 | -0.3804714 | 1.24E-07 | 0.00226992 | 0.202 | 0.465 |
| RPL13A    | 6 | -0.3805484 | 9.29E-23 | 1.70E-18   | 1     | 1     |
| RPS27A    | 6 | -0.3825875 | 1.39E-18 | 2.54E-14   | 1     | 1     |
| CFL1      | 6 | -0.3827139 | 5.91E-09 | 0.00010779 | 0.749 | 0.909 |
| TUBB      | 6 | -0.3830113 | 1.23E-06 | 0.02249609 | 0.72  | 0.859 |
| MIA       | 6 | -0.386685  | 1.91E-08 | 0.00034859 | 0.988 | 0.99  |
| SSR3      | 6 | -0.3880275 | 1.59E-06 | 0.02906928 | 0.807 | 0.899 |
| SERF2     | 6 | -0.3889334 | 1.53E-14 | 2.80E-10   | 1     | 1     |
| NDUFA3    | 6 | -0.3936148 | 6.09E-08 | 0.00111048 | 0.444 | 0.707 |
| HMGB1     | 6 | -0.3959218 | 1.23E-07 | 0.00225219 | 0.683 | 0.869 |
| NREP      | 6 | -0.3976981 | 9.32E-10 | 1.70E-05   | 0.148 | 0.434 |
| LITAF     | 6 | -0.3989504 | 1.63E-07 | 0.00298291 | 0.453 | 0.677 |
| LINC01503 | 6 | -0.4033765 | 3.45E-07 | 0.00629644 | 0.218 | 0.475 |
| S100A1    | 6 | -0.4035903 | 1.69E-09 | 3.08E-05   | 1     | 1     |
| SERPINA5  | 6 | -0.4045077 | 2.47E-08 | 0.00045126 | 0.465 | 0.747 |
| PFN1      | 6 | -0.4070313 | 2.52E-09 | 4.59E-05   | 0.922 | 0.96  |
| IDI1      | 6 | -0.4112388 | 2.46E-06 | 0.04493982 | 0.226 | 0.455 |
| PPT1      | 6 | -0.4120693 | 1.41E-07 | 0.00257478 | 0.313 | 0.566 |
| GPX4      | 6 | -0.4124338 | 6.76E-10 | 1.23E-05   | 0.996 | 0.98  |
| RPS2      | 6 | -0.4126948 | 1.81E-21 | 3.31E-17   | 1     | 1     |
| RPS23     | 6 | -0.4138807 | 4.45E-19 | 8.12E-15   | 1     | 1     |
| GNAS      | 6 | -0.4167647 | 3.91E-09 | 7.14E-05   | 0.551 | 0.758 |
| RPL23     | 6 | -0.4172231 | 5.78E-17 | 1.05E-12   | 0.996 | 1     |
| TMBIM6    | 6 | -0.4227431 | 2.15E-06 | 0.03931306 | 0.7   | 0.808 |
| NDUFA11   | 6 | -0.4228652 | 5.52E-11 | 1.01E-06   | 0.84  | 0.929 |
| BSG       | 6 | -0.4234165 | 3.08E-08 | 0.00056174 | 0.609 | 0.818 |
| COL5A2    | 6 | -0.4240087 | 1.31E-06 | 0.02391264 | 0.374 | 0.606 |
| RPS18     | 6 | -0.4243853 | 3.55E-20 | 6.48E-16   | 1     | 1     |
| NINJ1     | 6 | -0.4246539 | 3.28E-07 | 0.00597975 | 0.481 | 0.707 |
| SEC11A    | 6 | -0.4257308 | 2.86E-12 | 5.22E-08   | 0.815 | 0.919 |
| DBI       | 6 | -0.4309586 | 5.14E-10 | 9.39E-06   | 0.7   | 0.869 |
| HLA-C     | 6 | -0.4312953 | 3.18E-10 | 5.81E-06   | 0.868 | 0.97  |
| RPL23A    | 6 | -0.4314866 | 1.17E-22 | 2.14E-18   | 1     | 1     |
| RPL18     | 6 | -0.431757  | 2.13E-20 | 3.89E-16   | 1     | 1     |

|         |   |            |          |            |       |       |
|---------|---|------------|----------|------------|-------|-------|
| MOXD1   | 6 | -0.4349421 | 7.21E-09 | 0.00013152 | 0.239 | 0.515 |
| PLXDC2  | 6 | -0.4356205 | 2.61E-08 | 0.00047655 | 0.428 | 0.667 |
| UBA52   | 6 | -0.4372263 | 1.60E-23 | 2.92E-19   | 1     | 1     |
| MYL12B  | 6 | -0.4398328 | 1.77E-10 | 3.24E-06   | 0.551 | 0.788 |
| HERPUD1 | 6 | -0.4398665 | 6.44E-08 | 0.00117451 | 0.444 | 0.697 |
| RPS29   | 6 | -0.4400064 | 7.30E-21 | 1.33E-16   | 1     | 1     |
| INHBA   | 6 | -0.4425795 | 7.72E-07 | 0.01409161 | 0.255 | 0.495 |
| CITED2  | 6 | -0.4448791 | 2.88E-07 | 0.00526063 | 0.333 | 0.586 |
| RHOBTB3 | 6 | -0.4470436 | 1.10E-09 | 2.01E-05   | 0.387 | 0.697 |
| PEBP1   | 6 | -0.4470497 | 3.02E-11 | 5.51E-07   | 0.749 | 0.949 |
| NGFRAP1 | 6 | -0.4485388 | 3.54E-10 | 6.45E-06   | 0.84  | 0.96  |
| PPIB    | 6 | -0.4510198 | 1.65E-07 | 0.00300767 | 0.938 | 0.939 |
| PCBP2   | 6 | -0.4511803 | 1.10E-13 | 2.00E-09   | 0.844 | 0.97  |
| RPL27   | 6 | -0.4522896 | 6.41E-19 | 1.17E-14   | 1     | 1     |
| SSR4    | 6 | -0.4525526 | 4.30E-12 | 7.84E-08   | 0.975 | 0.99  |
| EIF3L   | 6 | -0.4536367 | 4.80E-13 | 8.77E-09   | 0.798 | 0.949 |
| RPL37   | 6 | -0.4596037 | 5.65E-22 | 1.03E-17   | 1     | 1     |
| PDIA3   | 6 | -0.4596867 | 2.76E-07 | 0.00503419 | 0.63  | 0.818 |
| H3F3A   | 6 | -0.4649732 | 9.23E-14 | 1.68E-09   | 0.951 | 1     |
| POLR2L  | 6 | -0.4652205 | 1.08E-08 | 0.00019648 | 0.86  | 0.939 |
| RPL30   | 6 | -0.4652617 | 8.25E-20 | 1.51E-15   | 1     | 1     |
| SNAI2   | 6 | -0.4680425 | 1.54E-06 | 0.02817015 | 0.416 | 0.646 |
| MALL    | 6 | -0.4688347 | 1.09E-07 | 0.00199693 | 0.23  | 0.485 |
| RPS12   | 6 | -0.4709264 | 1.05E-19 | 1.92E-15   | 1     | 1     |
| EEF2    | 6 | -0.4722025 | 1.44E-09 | 2.63E-05   | 0.979 | 1     |
| PRDX4   | 6 | -0.4748116 | 7.35E-09 | 0.00013418 | 0.794 | 0.929 |
| CCNI    | 6 | -0.4786699 | 1.65E-17 | 3.02E-13   | 0.996 | 1     |
| RPL34   | 6 | -0.4788297 | 5.04E-24 | 9.20E-20   | 1     | 1     |
| LGALS1  | 6 | -0.4818971 | 7.98E-10 | 1.46E-05   | 0.979 | 0.99  |
| RPS3A   | 6 | -0.4856449 | 4.84E-26 | 8.83E-22   | 1     | 1     |
| FHL1    | 6 | -0.4867458 | 6.36E-08 | 0.00116091 | 0.288 | 0.556 |
| HINT1   | 6 | -0.4880062 | 1.04E-15 | 1.89E-11   | 0.971 | 1     |
| TIMP2   | 6 | -0.4889739 | 2.52E-08 | 0.00046031 | 0.469 | 0.707 |
| TMED10  | 6 | -0.4911493 | 2.93E-13 | 5.34E-09   | 0.84  | 0.97  |
| PDE4DIP | 6 | -0.4924765 | 1.29E-14 | 2.35E-10   | 0.239 | 0.626 |
| UQCRH   | 6 | -0.4936806 | 2.86E-14 | 5.22E-10   | 0.909 | 0.97  |
| PLPP1   | 6 | -0.4959547 | 4.00E-11 | 7.29E-07   | 0.14  | 0.455 |
| CD9     | 6 | -0.4965498 | 1.49E-10 | 2.71E-06   | 0.564 | 0.808 |
| NUCB2   | 6 | -0.4989827 | 5.46E-08 | 0.00099541 | 0.399 | 0.636 |



|          |   |            |          |            |       |       |
|----------|---|------------|----------|------------|-------|-------|
| UQCRB    | 6 | -0.4997213 | 2.83E-12 | 5.17E-08   | 0.959 | 0.98  |
| RPS16    | 6 | -0.5012163 | 1.86E-27 | 3.39E-23   | 1     | 1     |
| RPLP1    | 6 | -0.5026455 | 4.45E-28 | 8.11E-24   | 1     | 1     |
| SDC2     | 6 | -0.5071288 | 2.45E-10 | 4.46E-06   | 0.852 | 0.949 |
| CCDC102B | 6 | -0.5144116 | 5.97E-21 | 1.09E-16   | 0.021 | 0.394 |
| C2orf82  | 6 | -0.5154792 | 8.30E-08 | 0.0015138  | 0.963 | 0.99  |
| ACTG1    | 6 | -0.5292105 | 3.92E-08 | 0.00071573 | 0.951 | 0.99  |
| SLC14A1  | 6 | -0.5354279 | 7.93E-11 | 1.45E-06   | 0.263 | 0.576 |
| CXXC5    | 6 | -0.5356487 | 2.10E-12 | 3.83E-08   | 0.206 | 0.566 |
| IGFBP7   | 6 | -0.536863  | 1.82E-07 | 0.00332918 | 0.914 | 0.96  |
| EEF1B2   | 6 | -0.5379389 | 1.38E-19 | 2.52E-15   | 0.988 | 1     |
| CD99     | 6 | -0.5385906 | 1.92E-16 | 3.51E-12   | 0.93  | 1     |
| RABAC1   | 6 | -0.5387811 | 2.34E-15 | 4.28E-11   | 0.733 | 0.949 |
| DNM3OS   | 6 | -0.5394904 | 2.78E-14 | 5.08E-10   | 0.189 | 0.596 |
| RPSA     | 6 | -0.5396106 | 4.93E-18 | 9.00E-14   | 1     | 1     |
| ANXA1    | 6 | -0.5410717 | 3.14E-08 | 0.00057231 | 0.716 | 0.879 |
| MSMO1    | 6 | -0.5417172 | 2.31E-06 | 0.04209582 | 0.243 | 0.465 |
| PDIA6    | 6 | -0.5420303 | 2.56E-10 | 4.68E-06   | 0.663 | 0.879 |
| MFGE8    | 6 | -0.5492806 | 1.87E-09 | 3.42E-05   | 0.831 | 0.98  |
| RPL7     | 6 | -0.5494271 | 3.99E-23 | 7.27E-19   | 1     | 1     |
| ARHGAP29 | 6 | -0.5547631 | 3.32E-08 | 0.00060554 | 0.416 | 0.636 |
| SLC40A1  | 6 | -0.5548297 | 7.11E-13 | 1.30E-08   | 0.099 | 0.414 |
| XAGE2    | 6 | -0.5581717 | 9.47E-12 | 1.73E-07   | 0     | 0.182 |
| HSPB1    | 6 | -0.5607445 | 2.04E-12 | 3.71E-08   | 0.63  | 0.869 |
| EEF1A1   | 6 | -0.5660655 | 2.44E-23 | 4.45E-19   | 1     | 1     |
| ARPC1B   | 6 | -0.5746809 | 3.99E-10 | 7.29E-06   | 0.379 | 0.687 |
| NUPR1    | 6 | -0.5747047 | 3.39E-10 | 6.19E-06   | 0.955 | 0.97  |
| ITM2A    | 6 | -0.5765214 | 3.65E-13 | 6.66E-09   | 0.42  | 0.778 |
| RPN2     | 6 | -0.5786542 | 2.39E-14 | 4.37E-10   | 0.198 | 0.586 |
| RPS17    | 6 | -0.5791962 | 8.96E-27 | 1.64E-22   | 1     | 1     |
| OAF      | 6 | -0.58248   | 7.47E-12 | 1.36E-07   | 0.169 | 0.495 |
| RPL10A   | 6 | -0.587883  | 2.75E-25 | 5.02E-21   | 1     | 1     |
| COL11A1  | 6 | -0.5929594 | 1.35E-07 | 0.00245794 | 0.757 | 0.879 |
| SLPI     | 6 | -0.5996577 | 3.48E-08 | 0.00063411 | 0.984 | 1     |
| RPS8     | 6 | -0.6024251 | 7.10E-30 | 1.29E-25   | 1     | 1     |
| TPT1     | 6 | -0.6084143 | 1.12E-31 | 2.04E-27   | 1     | 1     |
| MYL6     | 6 | -0.609919  | 1.29E-18 | 2.35E-14   | 0.951 | 0.99  |
| RPLP2    | 6 | -0.6101469 | 7.05E-34 | 1.29E-29   | 1     | 1     |
| CRISPLD1 | 6 | -0.6102595 | 5.54E-15 | 1.01E-10   | 0.07  | 0.404 |

|         |   |            |          |            |       |       |
|---------|---|------------|----------|------------|-------|-------|
| FBXO2   | 6 | -0.61511   | 5.44E-15 | 9.92E-11   | 0.691 | 0.939 |
| YBX1    | 6 | -0.6276513 | 2.19E-21 | 3.99E-17   | 0.959 | 1     |
| PTRF    | 6 | -0.6283373 | 7.33E-11 | 1.34E-06   | 0.432 | 0.687 |
| MYLK    | 6 | -0.6301937 | 1.55E-15 | 2.82E-11   | 0.148 | 0.535 |
| RPL4    | 6 | -0.6312718 | 1.51E-29 | 2.76E-25   | 0.996 | 1     |
| TCF4    | 6 | -0.6326605 | 3.62E-12 | 6.60E-08   | 0.226 | 0.566 |
| GPX3    | 6 | -0.648077  | 2.71E-14 | 4.94E-10   | 0.942 | 0.97  |
| NPC2    | 6 | -0.6482994 | 4.26E-22 | 7.77E-18   | 0.951 | 1     |
| TSPO    | 6 | -0.663149  | 1.44E-21 | 2.63E-17   | 0.737 | 0.96  |
| YBX3    | 6 | -0.6665675 | 7.06E-24 | 1.29E-19   | 0.745 | 0.97  |
| CRYAB   | 6 | -0.6686315 | 3.28E-12 | 5.99E-08   | 0.708 | 0.929 |
| IGFBP6  | 6 | -0.6779576 | 6.79E-11 | 1.24E-06   | 0.704 | 0.859 |
| PAX1    | 6 | -0.6996473 | 9.29E-17 | 1.69E-12   | 0.535 | 0.848 |
| CRTAP   | 6 | -0.7146762 | 4.80E-18 | 8.76E-14   | 0.494 | 0.828 |
| PTMS    | 6 | -0.7164707 | 6.78E-24 | 1.24E-19   | 0.465 | 0.929 |
| ID3     | 6 | -0.7341354 | 1.40E-09 | 2.55E-05   | 0.362 | 0.687 |
| RPLP0   | 6 | -0.7349579 | 2.34E-36 | 4.27E-32   | 1     | 1     |
| P4HB    | 6 | -0.7414377 | 1.16E-15 | 2.12E-11   | 0.852 | 0.97  |
| MT-CO2  | 6 | -0.7693312 | 7.87E-10 | 1.44E-05   | 0.955 | 0.96  |
| B2M     | 6 | -0.7845565 | 8.33E-26 | 1.52E-21   | 0.988 | 1     |
| ZFP36L2 | 6 | -0.789923  | 8.77E-15 | 1.60E-10   | 0.181 | 0.556 |
| MGP     | 6 | -0.7902949 | 3.32E-09 | 6.06E-05   | 0.996 | 1     |
| MT-CO1  | 6 | -0.7929383 | 2.21E-10 | 4.04E-06   | 0.951 | 0.939 |
| APOD    | 6 | -0.7952874 | 1.26E-14 | 2.30E-10   | 0.202 | 0.586 |
| EIF3H   | 6 | -0.8055348 | 9.99E-26 | 1.82E-21   | 0.922 | 1     |
| THY1    | 6 | -0.8055683 | 3.65E-15 | 6.66E-11   | 0.292 | 0.687 |
| ISLR    | 6 | -0.8160906 | 3.05E-18 | 5.57E-14   | 0.35  | 0.747 |
| PPIC    | 6 | -0.8199076 | 2.87E-18 | 5.23E-14   | 0.296 | 0.747 |
| MT-ND1  | 6 | -0.8250029 | 6.30E-13 | 1.15E-08   | 0.519 | 0.828 |
| CRIP2   | 6 | -0.8278492 | 2.79E-25 | 5.08E-21   | 0.276 | 0.798 |
| TSC22D1 | 6 | -0.8434168 | 5.67E-07 | 0.01033701 | 0.765 | 0.909 |
| FTH1    | 6 | -0.8647495 | 2.36E-25 | 4.30E-21   | 1     | 1     |
| MT-CO3  | 6 | -0.8744111 | 5.50E-11 | 1.00E-06   | 0.848 | 0.939 |
| OGN     | 6 | -0.9406831 | 1.93E-16 | 3.51E-12   | 0.901 | 0.99  |
| MT-ND2  | 6 | -0.9500981 | 1.08E-12 | 1.98E-08   | 0.613 | 0.838 |
| MT-ATP6 | 6 | -0.9533661 | 3.01E-15 | 5.49E-11   | 0.749 | 0.909 |
| PLAC9   | 6 | -0.9827619 | 1.68E-20 | 3.07E-16   | 0.733 | 0.939 |
| RPS11   | 6 | -1.002838  | 3.21E-42 | 5.85E-38   | 0.979 | 1     |
| RPS20   | 6 | -1.0147113 | 1.76E-43 | 3.21E-39   | 0.992 | 1     |

| MT-ND3    | 6       | -1.0294742 | 1.14E-14 | 2.08E-10   | 0.597 | 0.828 |
|-----------|---------|------------|----------|------------|-------|-------|
| MT-CYB    | 6       | -1.0725581 | 1.07E-17 | 1.95E-13   | 0.556 | 0.848 |
| CYR61     | 6       | -1.1110348 | 1.05E-19 | 1.92E-15   | 0.222 | 0.697 |
| CAPS      | 6       | -1.1205152 | 1.65E-23 | 3.01E-19   | 0.683 | 0.97  |
| ADIRF     | 6       | -1.1323792 | 3.72E-28 | 6.78E-24   | 0.333 | 0.879 |
| NEAT1     | 6       | -1.1702245 | 2.54E-24 | 4.63E-20   | 0.963 | 1     |
| CLEC3A    | 6       | -1.2737309 | 1.22E-21 | 2.22E-17   | 0.383 | 0.838 |
| SPARC     | 6       | -1.278278  | 4.63E-26 | 8.45E-22   | 0.506 | 0.929 |
| SPTSSB    | 6       | -1.4602904 | 1.30E-40 | 2.37E-36   | 0.025 | 0.677 |
| FRZB      | 6       | -1.4762204 | 7.27E-24 | 1.33E-19   | 0.251 | 0.778 |
| CTGF      | 6       | -1.4874391 | 3.75E-17 | 6.84E-13   | 0.362 | 0.828 |
| COL2A1    | 6       | -1.5596144 | 3.02E-26 | 5.50E-22   | 0.568 | 0.96  |
| gene      | cluster | avg_logFC  | p_val    | p_val_adj  | pct.1 | pct.2 |
| PLA2G2A   | 7       | 1.59159912 | 2.42E-16 | 4.42E-12   | 0.718 | 0.306 |
| CTHRC1    | 7       | 1.56383792 | 5.57E-30 | 1.02E-25   | 0.889 | 0.376 |
| TGFBI     | 7       | 1.38947724 | 1.09E-28 | 1.99E-24   | 0.897 | 0.422 |
| COL1A1    | 7       | 1.35985487 | 2.84E-09 | 5.18E-05   | 0.496 | 0.197 |
| SPP1      | 7       | 1.04526268 | 4.40E-22 | 8.02E-18   | 0.547 | 0.052 |
| CYP1B1    | 7       | 0.95564746 | 9.26E-10 | 1.69E-05   | 0.598 | 0.283 |
| CHI3L2    | 7       | 0.87633948 | 4.48E-12 | 8.18E-08   | 0.65  | 0.347 |
| COL3A1    | 7       | 0.86395817 | 1.69E-08 | 0.00030907 | 0.897 | 0.775 |
| PHLDA1    | 7       | 0.81600085 | 5.56E-12 | 1.01E-07   | 0.538 | 0.179 |
| TIMP1     | 7       | 0.79725594 | 1.68E-12 | 3.06E-08   | 1     | 0.988 |
| MMP2      | 7       | 0.71526941 | 3.34E-08 | 0.00060981 | 0.197 | 0.012 |
| ADAMTS6   | 7       | 0.67993031 | 5.64E-15 | 1.03E-10   | 0.607 | 0.197 |
| LTBP1     | 7       | 0.67141962 | 7.35E-17 | 1.34E-12   | 0.581 | 0.15  |
| TNC       | 7       | 0.65871297 | 3.94E-10 | 7.19E-06   | 0.632 | 0.324 |
| TNFRSF11B | 7       | 0.64571401 | 3.13E-08 | 0.00057189 | 0.684 | 0.428 |
| COMP      | 7       | 0.64512332 | 4.33E-07 | 0.00790482 | 0.812 | 0.595 |
| VMP1      | 7       | 0.63322222 | 1.13E-09 | 2.07E-05   | 0.735 | 0.52  |
| EPYC      | 7       | 0.60903016 | 1.48E-09 | 2.70E-05   | 0.521 | 0.214 |
| PPP3CA    | 7       | 0.60202735 | 9.84E-10 | 1.80E-05   | 0.897 | 0.746 |
| MT1X      | 7       | 0.58451426 | 1.13E-06 | 0.02058364 | 1     | 0.936 |
| COL1A2    | 7       | 0.58156034 | 8.73E-07 | 0.01592634 | 0.923 | 0.85  |
| IL11      | 7       | 0.51827284 | 9.11E-07 | 0.01662441 | 0.179 | 0.017 |
| PTGES     | 7       | 0.50775456 | 1.34E-10 | 2.45E-06   | 0.41  | 0.098 |
| CRLF1     | 7       | 0.48841657 | 5.42E-10 | 9.90E-06   | 0.701 | 0.393 |
| FN1       | 7       | 0.47544335 | 1.43E-09 | 2.61E-05   | 0.991 | 1     |
| CYTL1     | 7       | 0.4722432  | 3.76E-10 | 6.86E-06   | 0.812 | 0.451 |

|              |   |            |          |            |       |       |
|--------------|---|------------|----------|------------|-------|-------|
| ITM2B        | 7 | 0.4413074  | 2.30E-08 | 0.00041901 | 0.983 | 0.925 |
| BAALC        | 7 | 0.41282394 | 2.60E-06 | 0.0474943  | 0.692 | 0.532 |
| PRRX2        | 7 | 0.4047853  | 4.56E-09 | 8.32E-05   | 0.53  | 0.225 |
| SLC25A37     | 7 | 0.39111766 | 1.89E-06 | 0.03448445 | 0.769 | 0.584 |
| SOD2         | 7 | 0.37326004 | 1.05E-07 | 0.0019122  | 0.761 | 0.59  |
| AEBP1        | 7 | 0.37221351 | 1.13E-07 | 0.00205553 | 0.923 | 0.769 |
| GJA1         | 7 | 0.36979489 | 4.36E-07 | 0.00795686 | 0.547 | 0.266 |
| BMP2         | 7 | 0.3686448  | 5.34E-07 | 0.00975159 | 0.231 | 0.04  |
| DUSP4        | 7 | 0.36356771 | 5.51E-09 | 0.00010048 | 0.308 | 0.058 |
| PDE4B        | 7 | 0.3336606  | 6.32E-08 | 0.00115387 | 0.385 | 0.121 |
| CYGB         | 7 | 0.30842594 | 4.84E-08 | 0.00088332 | 0.316 | 0.075 |
| TREM1        | 7 | 0.30823    | 4.51E-13 | 8.23E-09   | 0.316 | 0.017 |
| SMIM3        | 7 | 0.29891147 | 2.24E-08 | 0.00040815 | 0.376 | 0.11  |
| LEF1         | 7 | 0.29748205 | 9.33E-10 | 1.70E-05   | 0.274 | 0.029 |
| SAMD11       | 7 | 0.29630987 | 4.88E-08 | 0.00089113 | 0.385 | 0.116 |
| TNFSF11      | 7 | 0.26405878 | 6.20E-08 | 0.00113057 | 0.205 | 0.017 |
| ARFGEF3      | 7 | -0.2507362 | 1.31E-07 | 0.00239136 | 0.026 | 0.26  |
| CHCHD2       | 7 | -0.2508147 | 1.19E-06 | 0.02174942 | 0.991 | 1     |
| DHCR7        | 7 | -0.2528393 | 1.43E-07 | 0.00260618 | 0.051 | 0.306 |
| PLA2G16      | 7 | -0.2566609 | 3.21E-07 | 0.00585554 | 0.051 | 0.295 |
| DAP          | 7 | -0.2570781 | 1.57E-06 | 0.0285621  | 0.701 | 0.89  |
| RPL3         | 7 | -0.2572936 | 6.51E-09 | 0.00011886 | 1     | 1     |
| PPDPF        | 7 | -0.2598489 | 7.65E-09 | 0.00013957 | 1     | 1     |
| RPS17        | 7 | -0.2622806 | 5.19E-11 | 9.47E-07   | 1     | 1     |
| SRGAP1       | 7 | -0.2640021 | 6.03E-07 | 0.01099569 | 0.12  | 0.387 |
| CYB5D2       | 7 | -0.2644183 | 7.22E-07 | 0.01316536 | 0.231 | 0.52  |
| AC003090.1   | 7 | -0.2644468 | 1.22E-06 | 0.02227536 | 0.043 | 0.26  |
| RPL31        | 7 | -0.2668103 | 1.37E-09 | 2.51E-05   | 1     | 1     |
| SYNGR1       | 7 | -0.2676619 | 2.61E-07 | 0.00476104 | 0.214 | 0.52  |
| RP4-621F18.2 | 7 | -0.2683815 | 1.07E-06 | 0.01959792 | 0.145 | 0.41  |
| RPL23A       | 7 | -0.268634  | 1.81E-12 | 3.30E-08   | 1     | 1     |
| TOMM7        | 7 | -0.2695942 | 5.04E-10 | 9.19E-06   | 0.991 | 1     |
| EDF1         | 7 | -0.2727591 | 1.95E-07 | 0.00355109 | 0.949 | 0.988 |
| PDXK         | 7 | -0.2755379 | 1.48E-06 | 0.02697669 | 0.256 | 0.538 |
| RPS8         | 7 | -0.2757736 | 3.91E-12 | 7.13E-08   | 1     | 1     |
| ENKUR        | 7 | -0.2764962 | 2.25E-08 | 0.00041077 | 0.017 | 0.266 |
| PXDN         | 7 | -0.2775955 | 6.43E-07 | 0.01173964 | 0.205 | 0.491 |
| OAZ1         | 7 | -0.2793274 | 4.46E-07 | 0.00813041 | 1     | 1     |
| SRP14        | 7 | -0.2798499 | 9.48E-08 | 0.00173026 | 0.991 | 0.994 |

|          |   |            |          |            |       |       |
|----------|---|------------|----------|------------|-------|-------|
| YIPF2    | 7 | -0.2836322 | 2.56E-06 | 0.04670799 | 0.427 | 0.717 |
| RPS3A    | 7 | -0.2849616 | 1.49E-12 | 2.72E-08   | 1     | 1     |
| RPS2     | 7 | -0.285482  | 7.99E-11 | 1.46E-06   | 1     | 1     |
| CCNI     | 7 | -0.2893669 | 1.91E-06 | 0.03487109 | 0.983 | 0.994 |
| TSPAN5   | 7 | -0.2908562 | 4.94E-08 | 0.00090207 | 0.137 | 0.439 |
| PLCD3    | 7 | -0.2944249 | 4.28E-08 | 0.0007811  | 0.12  | 0.416 |
| GTF3A    | 7 | -0.2953702 | 2.21E-06 | 0.04034002 | 0.556 | 0.786 |
| RPL30    | 7 | -0.2966387 | 3.58E-14 | 6.54E-10   | 1     | 1     |
| RBM39    | 7 | -0.2981156 | 1.28E-06 | 0.02343124 | 0.684 | 0.844 |
| ARSJ     | 7 | -0.2984771 | 3.01E-07 | 0.00549755 | 0.188 | 0.468 |
| PGAM1    | 7 | -0.3008468 | 1.61E-06 | 0.02928792 | 0.855 | 0.948 |
| RPL37    | 7 | -0.302239  | 7.02E-15 | 1.28E-10   | 1     | 1     |
| GPX4     | 7 | -0.3047881 | 1.07E-07 | 0.00194854 | 0.983 | 0.988 |
| PRPSAP1  | 7 | -0.3054251 | 8.38E-09 | 0.00015285 | 0.197 | 0.543 |
| PCBP2    | 7 | -0.3060537 | 4.28E-09 | 7.82E-05   | 0.949 | 1     |
| DBI      | 7 | -0.3067244 | 1.55E-06 | 0.02821027 | 0.821 | 0.965 |
| GNB2L1   | 7 | -0.3094645 | 1.10E-08 | 0.00019998 | 1     | 1     |
| DNAJC4   | 7 | -0.3113032 | 3.08E-09 | 5.62E-05   | 0.282 | 0.653 |
| CCSER2   | 7 | -0.3114784 | 3.68E-07 | 0.00670947 | 0.274 | 0.566 |
| NQO1     | 7 | -0.3121819 | 4.77E-07 | 0.00870502 | 0.197 | 0.48  |
| C10orf54 | 7 | -0.3141509 | 5.39E-08 | 0.00098288 | 0.051 | 0.312 |
| RPA3     | 7 | -0.3151703 | 7.26E-07 | 0.01325151 | 0.419 | 0.682 |
| ANXA11   | 7 | -0.3160158 | 1.84E-07 | 0.0033622  | 0.171 | 0.462 |
| ZNF706   | 7 | -0.3168446 | 8.65E-07 | 0.01578885 | 0.513 | 0.751 |
| RPL23    | 7 | -0.3175204 | 2.40E-12 | 4.38E-08   | 1     | 1     |
| FLNA     | 7 | -0.3187803 | 8.24E-07 | 0.01502826 | 0.231 | 0.503 |
| FUS      | 7 | -0.319124  | 2.70E-06 | 0.04924918 | 0.487 | 0.751 |
| ODC1     | 7 | -0.3196047 | 4.61E-08 | 0.00084182 | 0.162 | 0.474 |
| RPL14    | 7 | -0.3218197 | 1.85E-13 | 3.38E-09   | 1     | 1     |
| ARL2BP   | 7 | -0.3218321 | 1.27E-06 | 0.02322165 | 0.59  | 0.757 |
| ALDOA    | 7 | -0.3224616 | 3.66E-09 | 6.68E-05   | 0.983 | 1     |
| KDELR1   | 7 | -0.3236202 | 2.47E-06 | 0.04504308 | 0.667 | 0.821 |
| AFF3     | 7 | -0.3240084 | 2.81E-08 | 0.00051338 | 0.12  | 0.422 |
| CYSTM1   | 7 | -0.325019  | 2.32E-06 | 0.04224881 | 0.368 | 0.624 |
| FTH1     | 7 | -0.32838   | 2.11E-10 | 3.86E-06   | 1     | 1     |
| EIF3K    | 7 | -0.3314723 | 1.12E-06 | 0.02040458 | 0.667 | 0.855 |
| ZIC1     | 7 | -0.3332279 | 3.10E-08 | 0.000565   | 0.154 | 0.474 |
| GNAS     | 7 | -0.3340555 | 9.32E-08 | 0.00170003 | 0.795 | 0.913 |
| ZCRB1    | 7 | -0.3341707 | 4.41E-08 | 0.00080486 | 0.504 | 0.757 |

|         |   |            |          |            |       |       |
|---------|---|------------|----------|------------|-------|-------|
| RPS16   | 7 | -0.3362567 | 1.22E-16 | 2.22E-12   | 1     | 1     |
| COPZ2   | 7 | -0.3365507 | 3.71E-07 | 0.00676621 | 0.564 | 0.838 |
| LPIN1   | 7 | -0.3376205 | 1.20E-06 | 0.02187638 | 0.171 | 0.422 |
| TPT1    | 7 | -0.3385573 | 5.36E-14 | 9.77E-10   | 1     | 1     |
| ATP5A1  | 7 | -0.3424631 | 7.79E-07 | 0.01420827 | 0.521 | 0.723 |
| MGLL    | 7 | -0.3425967 | 4.39E-07 | 0.00801672 | 0.231 | 0.526 |
| C1orf21 | 7 | -0.3442718 | 2.60E-07 | 0.00474988 | 0.479 | 0.751 |
| CAPNS1  | 7 | -0.3464813 | 4.12E-07 | 0.00750866 | 0.402 | 0.665 |
| GPC6    | 7 | -0.3479868 | 2.50E-08 | 0.0004562  | 0.496 | 0.792 |
| CALM3   | 7 | -0.3485495 | 1.55E-06 | 0.02832604 | 0.667 | 0.815 |
| OTOS    | 7 | -0.3487166 | 4.79E-09 | 8.75E-05   | 0.111 | 0.439 |
| GPC1    | 7 | -0.3491763 | 8.33E-10 | 1.52E-05   | 0.214 | 0.566 |
| CD81    | 7 | -0.3494318 | 2.46E-06 | 0.04485053 | 0.513 | 0.699 |
| CETN2   | 7 | -0.3508197 | 3.84E-08 | 0.00070021 | 0.419 | 0.705 |
| RBM3    | 7 | -0.351175  | 5.12E-08 | 0.00093431 | 0.615 | 0.844 |
| NKX3-2  | 7 | -0.3525818 | 6.49E-07 | 0.01184208 | 0.137 | 0.399 |
| RPL4    | 7 | -0.3579676 | 1.33E-13 | 2.43E-09   | 1     | 1     |
| MXD4    | 7 | -0.3579882 | 2.89E-08 | 0.00052683 | 0.188 | 0.486 |
| MLEC    | 7 | -0.360806  | 1.47E-07 | 0.00268963 | 0.564 | 0.821 |
| PDE4DIP | 7 | -0.368969  | 3.73E-08 | 0.0006806  | 0.462 | 0.74  |
| SSR2    | 7 | -0.371886  | 3.07E-09 | 5.60E-05   | 0.846 | 0.983 |
| NFIC    | 7 | -0.3747511 | 2.34E-08 | 0.00042729 | 0.59  | 0.815 |
| ZBTB20  | 7 | -0.3769926 | 4.16E-09 | 7.60E-05   | 0.299 | 0.647 |
| BTF3    | 7 | -0.3772072 | 8.04E-13 | 1.47E-08   | 0.983 | 1     |
| DSTN    | 7 | -0.3786309 | 4.97E-11 | 9.07E-07   | 1     | 1     |
| HDLBP   | 7 | -0.3795878 | 2.73E-09 | 4.98E-05   | 0.709 | 0.89  |
| ITGA10  | 7 | -0.3834208 | 4.68E-07 | 0.00853213 | 0.325 | 0.618 |
| FTL     | 7 | -0.3839556 | 3.00E-11 | 5.47E-07   | 1     | 1     |
| GSTP1   | 7 | -0.3860092 | 4.72E-08 | 0.00086182 | 0.923 | 0.965 |
| ARPC1B  | 7 | -0.3861456 | 2.09E-06 | 0.03821425 | 0.821 | 0.96  |
| SLC25A3 | 7 | -0.3886926 | 9.29E-09 | 0.00016954 | 0.812 | 0.919 |
| MFGE8   | 7 | -0.3888187 | 3.36E-07 | 0.00612797 | 0.752 | 0.908 |
| PEBP1   | 7 | -0.3889034 | 1.74E-09 | 3.18E-05   | 0.761 | 0.908 |
| TSPO    | 7 | -0.3902439 | 7.03E-10 | 1.28E-05   | 0.906 | 0.977 |
| MYL6    | 7 | -0.3909088 | 1.09E-06 | 0.01997645 | 0.983 | 0.988 |
| TSPAN4  | 7 | -0.39211   | 3.19E-07 | 0.00582943 | 0.641 | 0.844 |
| C1QTNF8 | 7 | -0.3942    | 4.49E-09 | 8.19E-05   | 0.222 | 0.538 |
| MOXD1   | 7 | -0.3954307 | 6.65E-07 | 0.01213437 | 0.197 | 0.462 |
| RPL18   | 7 | -0.3969475 | 6.31E-18 | 1.15E-13   | 1     | 1     |

|           |   |            |          |            |       |       |
|-----------|---|------------|----------|------------|-------|-------|
| AHNAK2    | 7 | -0.3973397 | 2.76E-08 | 0.00050398 | 0.231 | 0.543 |
| SPARC     | 7 | -0.3980107 | 9.59E-09 | 0.000175   | 0.932 | 0.994 |
| CXXC5     | 7 | -0.4000672 | 1.91E-08 | 0.00034939 | 0.556 | 0.803 |
| TKT       | 7 | -0.4044911 | 4.68E-08 | 0.0008548  | 0.35  | 0.676 |
| KHDRBS3   | 7 | -0.4048869 | 3.29E-10 | 6.00E-06   | 0.026 | 0.329 |
| YBX1      | 7 | -0.4054079 | 3.56E-11 | 6.50E-07   | 0.983 | 1     |
| MALAT1    | 7 | -0.405487  | 3.21E-12 | 5.85E-08   | 1     | 1     |
| S100A6    | 7 | -0.4056118 | 2.36E-08 | 0.00043138 | 1     | 1     |
| NFIA      | 7 | -0.4065422 | 2.26E-11 | 4.13E-07   | 0.368 | 0.763 |
| HEBP2     | 7 | -0.4085522 | 5.43E-08 | 0.00099029 | 0.624 | 0.867 |
| SLC9A3R2  | 7 | -0.4085728 | 4.00E-08 | 0.0007298  | 0.316 | 0.618 |
| CALR      | 7 | -0.4124928 | 1.30E-07 | 0.00237847 | 0.863 | 0.948 |
| ARHGAP29  | 7 | -0.4131113 | 6.03E-09 | 0.00010997 | 0.359 | 0.665 |
| MMP24-AS1 | 7 | -0.4141468 | 4.54E-09 | 8.28E-05   | 0.573 | 0.832 |
| ATRNL1    | 7 | -0.4154966 | 3.37E-11 | 6.15E-07   | 0.094 | 0.457 |
| AHNAK     | 7 | -0.4159738 | 2.21E-07 | 0.00403082 | 0.701 | 0.827 |
| RHOA      | 7 | -0.4171565 | 1.29E-11 | 2.35E-07   | 0.846 | 0.954 |
| C14orf1   | 7 | -0.4204473 | 2.25E-08 | 0.00040968 | 0.359 | 0.671 |
| FXVD5     | 7 | -0.4208907 | 2.70E-08 | 0.00049227 | 0.812 | 0.942 |
| AP2M1     | 7 | -0.4228344 | 1.53E-09 | 2.79E-05   | 0.624 | 0.908 |
| HSPB1     | 7 | -0.4285287 | 2.45E-08 | 0.00044694 | 0.829 | 0.908 |
| NDUFA11   | 7 | -0.4311147 | 2.29E-12 | 4.18E-08   | 0.906 | 0.983 |
| HSPB6     | 7 | -0.4328398 | 2.03E-09 | 3.70E-05   | 0.274 | 0.618 |
| LGALS1    | 7 | -0.4330716 | 4.95E-07 | 0.00904099 | 1     | 1     |
| RPL7      | 7 | -0.4374891 | 4.70E-18 | 8.57E-14   | 1     | 1     |
| OSBPL9    | 7 | -0.4392306 | 3.02E-07 | 0.00551506 | 0.265 | 0.532 |
| IGFBP6    | 7 | -0.4395478 | 1.25E-07 | 0.00228422 | 0.769 | 0.936 |
| MT-ND5    | 7 | -0.4416154 | 4.74E-09 | 8.65E-05   | 0.658 | 0.832 |
| NUCB2     | 7 | -0.444204  | 7.15E-09 | 0.00013042 | 0.487 | 0.798 |
| CRISPLD1  | 7 | -0.4463922 | 6.80E-08 | 0.00124059 | 0.12  | 0.399 |
| HRCT1     | 7 | -0.4493542 | 7.52E-09 | 0.00013731 | 0.077 | 0.37  |
| RPSA      | 7 | -0.4498986 | 1.54E-16 | 2.81E-12   | 1     | 1     |
| SPINT2    | 7 | -0.4499497 | 3.77E-09 | 6.89E-05   | 0.154 | 0.474 |
| PAX1      | 7 | -0.4505021 | 8.56E-07 | 0.01562294 | 0.718 | 0.838 |
| TPM2      | 7 | -0.4516919 | 8.30E-10 | 1.51E-05   | 0.735 | 0.919 |
| S100A10   | 7 | -0.4541774 | 8.41E-08 | 0.00153535 | 0.983 | 0.994 |
| S100A1    | 7 | -0.4545774 | 7.02E-07 | 0.01281422 | 0.949 | 0.988 |
| SCD       | 7 | -0.4680147 | 5.30E-07 | 0.00967018 | 0.308 | 0.595 |
| ELL2      | 7 | -0.4715304 | 5.51E-11 | 1.01E-06   | 0.282 | 0.642 |

|           |   |            |          |            |       |       |
|-----------|---|------------|----------|------------|-------|-------|
| HCFC1R1   | 7 | -0.4879381 | 2.11E-10 | 3.86E-06   | 0.889 | 0.988 |
| METR1     | 7 | -0.4885091 | 1.73E-10 | 3.16E-06   | 0.427 | 0.757 |
| ACTG1     | 7 | -0.4886478 | 1.20E-07 | 0.00219677 | 0.906 | 0.971 |
| PDLIM2    | 7 | -0.4971416 | 8.54E-12 | 1.56E-07   | 0.692 | 0.873 |
| HINT1     | 7 | -0.4977741 | 9.84E-17 | 1.80E-12   | 0.94  | 1     |
| GAPDH     | 7 | -0.5004331 | 5.45E-13 | 9.94E-09   | 1     | 1     |
| LINC01503 | 7 | -0.5010755 | 1.39E-06 | 0.02527336 | 0.308 | 0.555 |
| CKAP4     | 7 | -0.5093177 | 1.07E-10 | 1.95E-06   | 0.59  | 0.85  |
| NPDC1     | 7 | -0.5121389 | 2.15E-15 | 3.92E-11   | 0.171 | 0.63  |
| EEF2      | 7 | -0.5181644 | 1.39E-09 | 2.53E-05   | 0.966 | 1     |
| TMEM106C  | 7 | -0.5226699 | 1.07E-13 | 1.95E-09   | 0.299 | 0.711 |
| TBL1XR1   | 7 | -0.5279599 | 1.26E-08 | 0.0002304  | 0.547 | 0.798 |
| NINJ1     | 7 | -0.5299808 | 2.20E-14 | 4.02E-10   | 0.282 | 0.723 |
| NGFRAP1   | 7 | -0.5303287 | 1.42E-14 | 2.59E-10   | 0.932 | 0.994 |
| P3H2      | 7 | -0.533423  | 7.25E-11 | 1.32E-06   | 0.282 | 0.665 |
| RPLP0     | 7 | -0.5389845 | 3.61E-29 | 6.59E-25   | 1     | 1     |
| DAB2      | 7 | -0.5398792 | 3.34E-09 | 6.09E-05   | 0.521 | 0.78  |
| PKM       | 7 | -0.5415893 | 1.52E-13 | 2.77E-09   | 0.915 | 0.983 |
| C2orf82   | 7 | -0.541819  | 2.85E-07 | 0.0051925  | 0.846 | 0.919 |
| CCDC102B  | 7 | -0.5492706 | 1.59E-15 | 2.89E-11   | 0.051 | 0.491 |
| CRYAB     | 7 | -0.5494054 | 1.32E-07 | 0.00240783 | 0.761 | 0.913 |
| LOXL1     | 7 | -0.5653795 | 4.91E-08 | 0.00089577 | 0.282 | 0.561 |
| CLU       | 7 | -0.5655528 | 1.47E-06 | 0.02687245 | 0.957 | 0.988 |
| FBXO2     | 7 | -0.5695954 | 2.80E-09 | 5.12E-05   | 0.641 | 0.85  |
| HIST1H1C  | 7 | -0.57507   | 1.96E-09 | 3.57E-05   | 0.085 | 0.399 |
| MAGED1    | 7 | -0.5769182 | 2.69E-12 | 4.91E-08   | 0.35  | 0.757 |
| EEF1A1    | 7 | -0.5780714 | 2.93E-23 | 5.35E-19   | 1     | 1     |
| PTRF      | 7 | -0.5921126 | 1.03E-16 | 1.88E-12   | 0.675 | 0.919 |
| SPTLC3    | 7 | -0.5935861 | 5.82E-08 | 0.00106134 | 0.299 | 0.566 |
| COL14A1   | 7 | -0.6046372 | 6.02E-11 | 1.10E-06   | 0.111 | 0.468 |
| NEAT1     | 7 | -0.6219931 | 2.97E-12 | 5.42E-08   | 1     | 1     |
| ITGA11    | 7 | -0.6478822 | 1.50E-16 | 2.74E-12   | 0.197 | 0.659 |
| COL8A1    | 7 | -0.6618491 | 7.89E-11 | 1.44E-06   | 0.077 | 0.416 |
| MT-CO2    | 7 | -0.6783066 | 3.10E-20 | 5.66E-16   | 0.957 | 0.988 |
| SDC2      | 7 | -0.6813995 | 1.49E-17 | 2.72E-13   | 0.872 | 0.983 |
| RPS11     | 7 | -0.6966022 | 3.24E-34 | 5.91E-30   | 0.991 | 1     |
| FRZB      | 7 | -0.7242081 | 2.54E-06 | 0.04639055 | 0.239 | 0.509 |
| SPTSSB    | 7 | -0.7272414 | 1.53E-09 | 2.79E-05   | 0     | 0.266 |
| CRIP2     | 7 | -0.7323406 | 3.60E-17 | 6.57E-13   | 0.47  | 0.85  |



| DOK1    | 7       | -0.7348936 | 5.60E-10 | 1.02E-05   | 0.333 | 0.676 |
|---------|---------|------------|----------|------------|-------|-------|
| MT-ND4  | 7       | -0.7575953 | 5.07E-28 | 9.24E-24   | 0.949 | 0.994 |
| CITED2  | 7       | -0.7871026 | 2.26E-12 | 4.12E-08   | 0.35  | 0.694 |
| ZFP36L2 | 7       | -0.8062465 | 1.15E-11 | 2.09E-07   | 0.248 | 0.63  |
| EIF3H   | 7       | -0.8304323 | 2.41E-25 | 4.39E-21   | 0.829 | 0.96  |
| PLPP1   | 7       | -0.8309994 | 2.83E-18 | 5.17E-14   | 0.179 | 0.676 |
| COL2A1  | 7       | -0.8385229 | 2.01E-07 | 0.00366235 | 0.897 | 0.942 |
| RPS20   | 7       | -0.839652  | 2.06E-39 | 3.77E-35   | 1     | 1     |
| PRSS23  | 7       | -0.8755707 | 2.20E-09 | 4.02E-05   | 0.632 | 0.838 |
| THY1    | 7       | -0.8947854 | 3.42E-15 | 6.24E-11   | 0.812 | 0.983 |
| CAPS    | 7       | -0.9014849 | 1.45E-18 | 2.65E-14   | 0.573 | 0.936 |
| MT-ATP6 | 7       | -0.911867  | 4.29E-29 | 7.83E-25   | 0.923 | 0.988 |
| CYR61   | 7       | -0.9391886 | 1.99E-12 | 3.64E-08   | 0.615 | 0.873 |
| VIM     | 7       | -0.9413073 | 8.29E-15 | 1.51E-10   | 1     | 1     |
| MT-ND1  | 7       | -0.9721355 | 2.57E-29 | 4.69E-25   | 0.803 | 0.988 |
| MT-CO3  | 7       | -0.9865317 | 3.88E-34 | 7.08E-30   | 0.94  | 0.988 |
| MT-ND3  | 7       | -1.018359  | 2.00E-36 | 3.64E-32   | 0.872 | 0.988 |
| MT-CO1  | 7       | -1.0224252 | 2.58E-35 | 4.71E-31   | 0.949 | 0.994 |
| TPM1    | 7       | -1.0652244 | 1.05E-23 | 1.91E-19   | 0.718 | 0.965 |
| FHL1    | 7       | -1.0913335 | 1.82E-20 | 3.32E-16   | 0.299 | 0.792 |
| MT-CYB  | 7       | -1.1673559 | 7.31E-33 | 1.33E-28   | 0.838 | 0.988 |
| MT-ND2  | 7       | -1.2439353 | 1.40E-36 | 2.56E-32   | 0.752 | 0.988 |
| ADIRF   | 7       | -1.3064904 | 7.58E-26 | 1.38E-21   | 0.385 | 0.908 |
| CTGF    | 7       | -1.5748348 | 2.35E-12 | 4.29E-08   | 0.667 | 0.85  |
| MSMP    | 7       | -1.8139589 | 2.32E-12 | 4.24E-08   | 0.248 | 0.636 |
| gene    | cluster | avg_logFC  | p_val    | p_val_adj  | pct.1 | pct.2 |
| PLA2G2A | 8       | 1.94419782 | 4.04E-28 | 7.38E-24   | 0.838 | 0.338 |
| CHI3L2  | 8       | 1.36634745 | 2.06E-33 | 3.77E-29   | 0.87  | 0.384 |
| EPYC    | 8       | 1.2177949  | 6.12E-33 | 1.12E-28   | 0.792 | 0.197 |
| CCDC80  | 8       | 1.20939086 | 9.71E-37 | 1.77E-32   | 0.994 | 0.939 |
| FN1     | 8       | 1.17927638 | 8.35E-43 | 1.52E-38   | 1     | 1     |
| MT1G    | 8       | 1.11573937 | 2.55E-14 | 4.65E-10   | 0.987 | 0.894 |
| TGFBI   | 8       | 1.0757038  | 4.43E-31 | 8.09E-27   | 0.74  | 0.177 |
| AEBP1   | 8       | 0.94446161 | 3.28E-25 | 5.98E-21   | 0.844 | 0.444 |
| CHI3L1  | 8       | 0.91129795 | 1.04E-10 | 1.90E-06   | 0.929 | 0.854 |
| CTHRC1  | 8       | 0.88575401 | 5.88E-23 | 1.07E-18   | 0.578 | 0.106 |
| CYTL1   | 8       | 0.87450302 | 3.19E-11 | 5.83E-07   | 0.461 | 0.152 |
| SPP1    | 8       | 0.87174494 | 9.07E-30 | 1.65E-25   | 0.623 | 0.061 |
| MT1H    | 8       | 0.83463348 | 1.37E-07 | 0.00249836 | 0.74  | 0.51  |

|          |   |            |          |            |       |       |
|----------|---|------------|----------|------------|-------|-------|
| PPP3CA   | 8 | 0.82640561 | 4.41E-20 | 8.06E-16   | 0.909 | 0.631 |
| NOVA1    | 8 | 0.78728845 | 8.54E-21 | 1.56E-16   | 0.961 | 0.808 |
| BTG1     | 8 | 0.75855019 | 3.32E-22 | 6.07E-18   | 0.994 | 0.859 |
| MT1X     | 8 | 0.75246674 | 8.58E-16 | 1.57E-11   | 1     | 1     |
| SOD2     | 8 | 0.75018772 | 2.39E-11 | 4.36E-07   | 0.883 | 0.667 |
| VEGFA    | 8 | 0.74965366 | 1.11E-17 | 2.02E-13   | 0.669 | 0.273 |
| CTSD     | 8 | 0.69560175 | 1.05E-07 | 0.00191207 | 0.968 | 0.944 |
| TIMP1    | 8 | 0.67098202 | 4.23E-09 | 7.71E-05   | 0.981 | 1     |
| PRG4     | 8 | 0.63890741 | 9.53E-16 | 1.74E-11   | 0.357 | 0.03  |
| ANGPTL7  | 8 | 0.63316967 | 2.14E-09 | 3.90E-05   | 0.195 | 0.01  |
| MMP3     | 8 | 0.63138609 | 1.01E-11 | 1.83E-07   | 0.825 | 0.495 |
| SCRG1    | 8 | 0.56708226 | 1.59E-13 | 2.90E-09   | 1     | 1     |
| DDIT4L   | 8 | 0.56639547 | 2.28E-12 | 4.17E-08   | 0.643 | 0.318 |
| SMOC2    | 8 | 0.5582897  | 1.59E-12 | 2.90E-08   | 0.455 | 0.136 |
| PTGS2    | 8 | 0.55721194 | 1.71E-16 | 3.12E-12   | 0.364 | 0.03  |
| COX17    | 8 | 0.53844569 | 3.66E-15 | 6.68E-11   | 0.877 | 0.662 |
| CD44     | 8 | 0.53055763 | 2.31E-10 | 4.21E-06   | 0.695 | 0.419 |
| HILPDA   | 8 | 0.5278232  | 1.38E-09 | 2.51E-05   | 0.539 | 0.273 |
| SLC25A37 | 8 | 0.52618014 | 5.69E-09 | 0.00010382 | 0.727 | 0.515 |
| WWP2     | 8 | 0.51109211 | 2.65E-10 | 4.83E-06   | 0.857 | 0.727 |
| TMSB4X   | 8 | 0.5066221  | 5.06E-09 | 9.23E-05   | 0.896 | 0.803 |
| MT2A     | 8 | 0.50611108 | 2.65E-08 | 0.00048366 | 1     | 0.995 |
| C7orf73  | 8 | 0.49139909 | 1.48E-19 | 2.70E-15   | 0.987 | 0.919 |
| ADAMTS6  | 8 | 0.48986381 | 1.58E-10 | 2.89E-06   | 0.37  | 0.101 |
| COL1A2   | 8 | 0.48745723 | 2.15E-09 | 3.92E-05   | 0.74  | 0.465 |
| PAM      | 8 | 0.47316124 | 2.58E-13 | 4.71E-09   | 0.87  | 0.717 |
| C4orf48  | 8 | 0.46654142 | 1.72E-09 | 3.14E-05   | 0.558 | 0.278 |
| BAALC    | 8 | 0.46332614 | 3.54E-10 | 6.46E-06   | 0.571 | 0.278 |
| SLC26A2  | 8 | 0.44399877 | 8.82E-10 | 1.61E-05   | 0.695 | 0.424 |
| RNF145   | 8 | 0.44251507 | 1.10E-09 | 2.01E-05   | 0.63  | 0.394 |
| LUM      | 8 | 0.43390278 | 1.36E-10 | 2.48E-06   | 1     | 1     |
| SRGN     | 8 | 0.42073258 | 3.56E-07 | 0.0064978  | 0.468 | 0.242 |
| CD59     | 8 | 0.41430743 | 2.08E-10 | 3.80E-06   | 0.974 | 0.944 |
| SAMD11   | 8 | 0.40403552 | 5.97E-14 | 1.09E-09   | 0.279 | 0.01  |
| SEPW1    | 8 | 0.3965635  | 1.96E-07 | 0.00358261 | 0.766 | 0.611 |
| IFITM10  | 8 | 0.39556404 | 2.97E-08 | 0.00054171 | 0.591 | 0.338 |
| CFD      | 8 | 0.3896191  | 1.97E-09 | 3.59E-05   | 0.26  | 0.04  |
| HIF1A    | 8 | 0.38837731 | 3.32E-07 | 0.00605102 | 0.929 | 0.899 |
| SERF2    | 8 | 0.38302192 | 3.13E-19 | 5.71E-15   | 1     | 1     |

|           |   |            |          |            |       |       |
|-----------|---|------------|----------|------------|-------|-------|
| ACAN      | 8 | 0.38272554 | 7.07E-13 | 1.29E-08   | 1     | 1     |
| PNRC1     | 8 | 0.37900154 | 2.69E-10 | 4.90E-06   | 0.994 | 0.965 |
| CRIP1     | 8 | 0.37843143 | 5.79E-09 | 0.00010557 | 0.695 | 0.379 |
| MT1F      | 8 | 0.37759806 | 1.10E-07 | 0.00201063 | 0.994 | 0.864 |
| IGFBP3    | 8 | 0.36560357 | 1.34E-08 | 0.00024394 | 0.292 | 0.066 |
| CCND2-AS1 | 8 | 0.36398759 | 2.08E-11 | 3.80E-07   | 0.377 | 0.086 |
| TSHZ2     | 8 | 0.35518129 | 5.37E-14 | 9.80E-10   | 0.292 | 0.015 |
| C4orf3    | 8 | 0.34621317 | 2.65E-12 | 4.84E-08   | 1     | 0.985 |
| CRLF1     | 8 | 0.34404491 | 6.89E-07 | 0.01258049 | 0.416 | 0.187 |
| FAM162A   | 8 | 0.34390722 | 2.57E-07 | 0.0046975  | 0.929 | 0.783 |
| TPD52     | 8 | 0.33116336 | 2.26E-06 | 0.04118211 | 0.734 | 0.596 |
| CNPY2     | 8 | 0.3228302  | 3.75E-07 | 0.00684657 | 0.87  | 0.793 |
| GJA1      | 8 | 0.2796182  | 1.10E-06 | 0.02012055 | 0.227 | 0.056 |
| LTBP1     | 8 | 0.26598462 | 5.32E-10 | 9.70E-06   | 0.24  | 0.025 |
| COL9A1    | 8 | 0.25608771 | 2.20E-07 | 0.00402055 | 0.227 | 0.045 |
| RPLP1     | 8 | -0.2519564 | 8.57E-18 | 1.56E-13   | 1     | 1     |
| ARFGAP3   | 8 | -0.2531417 | 3.87E-08 | 0.0007056  | 0.182 | 0.465 |
| CLNS1A    | 8 | -0.2534056 | 2.34E-06 | 0.04265259 | 0.37  | 0.611 |
| RPL24     | 8 | -0.2535642 | 1.74E-12 | 3.18E-08   | 1     | 1     |
| DNAJC1    | 8 | -0.2541493 | 4.51E-07 | 0.0082255  | 0.175 | 0.429 |
| RPS14     | 8 | -0.2550429 | 1.64E-18 | 3.00E-14   | 1     | 1     |
| RPL11     | 8 | -0.2565679 | 3.46E-16 | 6.31E-12   | 1     | 1     |
| CDIPT     | 8 | -0.2572229 | 7.12E-07 | 0.01299961 | 0.13  | 0.354 |
| SOD1      | 8 | -0.2582682 | 9.00E-07 | 0.01641392 | 0.903 | 0.98  |
| RRAGD     | 8 | -0.258334  | 7.69E-08 | 0.0014029  | 0.104 | 0.343 |
| ACP1      | 8 | -0.2602656 | 2.14E-06 | 0.03909016 | 0.474 | 0.692 |
| SCFD1     | 8 | -0.2626313 | 4.22E-07 | 0.00770493 | 0.201 | 0.46  |
| C6orf48   | 8 | -0.2648608 | 1.38E-06 | 0.02519968 | 0.89  | 0.955 |
| GHITM     | 8 | -0.2657176 | 1.65E-06 | 0.03005726 | 0.416 | 0.677 |
| COL14A1   | 8 | -0.2659421 | 1.05E-07 | 0.00190995 | 0.006 | 0.182 |
| PPDPF     | 8 | -0.2679688 | 5.66E-11 | 1.03E-06   | 1     | 1     |
| COMTD1    | 8 | -0.2680635 | 1.20E-09 | 2.19E-05   | 0.052 | 0.313 |
| RPL36AL   | 8 | -0.2695946 | 6.34E-10 | 1.16E-05   | 0.994 | 0.99  |
| RPS12     | 8 | -0.2697992 | 1.02E-15 | 1.87E-11   | 1     | 1     |
| RAC1      | 8 | -0.2708009 | 6.50E-07 | 0.01186056 | 0.734 | 0.949 |
| FTL       | 8 | -0.2710043 | 1.91E-10 | 3.48E-06   | 1     | 1     |
| RPL27     | 8 | -0.2739805 | 5.57E-15 | 1.02E-10   | 1     | 1     |
| HMG2      | 8 | -0.2740233 | 1.82E-08 | 0.00033167 | 0.916 | 0.96  |
| RPS28     | 8 | -0.2742395 | 5.76E-20 | 1.05E-15   | 1     | 1     |

|         |   |            |          |            |       |       |
|---------|---|------------|----------|------------|-------|-------|
| ATP5L   | 8 | -0.2751931 | 9.69E-09 | 0.00017679 | 0.922 | 0.985 |
| RPS6    | 8 | -0.275861  | 1.15E-20 | 2.09E-16   | 1     | 1     |
| PPIB    | 8 | -0.2763518 | 1.41E-06 | 0.02580386 | 0.935 | 0.995 |
| BEX2    | 8 | -0.2768852 | 5.87E-08 | 0.00107113 | 0.162 | 0.449 |
| NDUFC2  | 8 | -0.277787  | 2.59E-06 | 0.04729564 | 0.597 | 0.803 |
| RPL26   | 8 | -0.2779035 | 2.80E-16 | 5.10E-12   | 1     | 1     |
| RPL15   | 8 | -0.2785862 | 5.93E-19 | 1.08E-14   | 1     | 1     |
| RPS3    | 8 | -0.2809142 | 3.82E-18 | 6.97E-14   | 1     | 1     |
| VPS28   | 8 | -0.2815834 | 8.97E-07 | 0.01636528 | 0.357 | 0.606 |
| RRAGA   | 8 | -0.2817119 | 3.28E-08 | 0.00059784 | 0.195 | 0.49  |
| RPS9    | 8 | -0.2820179 | 5.75E-17 | 1.05E-12   | 1     | 1     |
| PCBP2   | 8 | -0.282044  | 3.65E-08 | 0.00066685 | 0.948 | 0.99  |
| SERTAD4 | 8 | -0.2840523 | 1.45E-09 | 2.64E-05   | 0.045 | 0.298 |
| HS3ST1  | 8 | -0.2852135 | 1.45E-07 | 0.00264619 | 0.091 | 0.318 |
| RPS4Y1  | 8 | -0.286968  | 2.64E-10 | 4.81E-06   | 0.987 | 0.995 |
| FDFT1   | 8 | -0.2876821 | 3.02E-07 | 0.00551576 | 0.182 | 0.434 |
| FAU     | 8 | -0.2887848 | 6.01E-17 | 1.10E-12   | 1     | 1     |
| COX5A   | 8 | -0.2889935 | 1.86E-08 | 0.0003397  | 0.39  | 0.722 |
| SQSTM1  | 8 | -0.2906538 | 1.85E-07 | 0.00337941 | 0.708 | 0.904 |
| HSPD1   | 8 | -0.2938493 | 1.88E-07 | 0.00342835 | 0.338 | 0.621 |
| ENPP1   | 8 | -0.2947995 | 4.03E-07 | 0.00734618 | 0.37  | 0.646 |
| NDUFA11 | 8 | -0.2949078 | 5.70E-09 | 0.00010409 | 0.903 | 0.99  |
| RPL39   | 8 | -0.2950744 | 1.55E-15 | 2.82E-11   | 1     | 1     |
| RPS15A  | 8 | -0.295349  | 6.12E-23 | 1.12E-18   | 1     | 1     |
| SNRPD2  | 8 | -0.2955277 | 6.72E-09 | 0.00012261 | 0.851 | 0.955 |
| RPL21   | 8 | -0.2961152 | 2.52E-22 | 4.60E-18   | 1     | 1     |
| RPL37A  | 8 | -0.2966561 | 9.21E-24 | 1.68E-19   | 1     | 1     |
| RPS25   | 8 | -0.2979739 | 1.25E-17 | 2.28E-13   | 1     | 1     |
| MPC2    | 8 | -0.2982257 | 5.38E-08 | 0.00098255 | 0.331 | 0.621 |
| RPL13   | 8 | -0.2986732 | 4.03E-23 | 7.36E-19   | 1     | 1     |
| RPL36   | 8 | -0.2987974 | 3.44E-17 | 6.28E-13   | 1     | 1     |
| APOA1BP | 8 | -0.2999522 | 7.91E-07 | 0.01444107 | 0.182 | 0.419 |
| TMEM147 | 8 | -0.3002145 | 8.53E-08 | 0.00155566 | 0.617 | 0.833 |
| SLC38A1 | 8 | -0.3003672 | 2.03E-07 | 0.00370961 | 0.357 | 0.626 |
| CIRBP   | 8 | -0.302378  | 1.18E-07 | 0.00215319 | 0.968 | 0.985 |
| SLC25A5 | 8 | -0.3037662 | 9.49E-08 | 0.00173144 | 0.351 | 0.611 |
| IGBP1   | 8 | -0.3037662 | 2.02E-06 | 0.03691078 | 0.338 | 0.561 |
| EDF1    | 8 | -0.3041103 | 5.99E-10 | 1.09E-05   | 0.961 | 0.99  |
| RPL22   | 8 | -0.30472   | 1.55E-14 | 2.83E-10   | 1     | 1     |

|              |   |            |          |            |       |       |
|--------------|---|------------|----------|------------|-------|-------|
| PRNP         | 8 | -0.3076241 | 4.16E-07 | 0.00759813 | 0.253 | 0.515 |
| MTDH         | 8 | -0.3079033 | 5.84E-07 | 0.01065449 | 0.656 | 0.833 |
| FADS1        | 8 | -0.3090263 | 1.04E-07 | 0.00189141 | 0.175 | 0.434 |
| PDE4DIP      | 8 | -0.3098363 | 6.96E-08 | 0.00127082 | 0.506 | 0.768 |
| RNH1         | 8 | -0.3107197 | 2.01E-06 | 0.03660163 | 0.344 | 0.576 |
| MZT2B        | 8 | -0.3108869 | 9.91E-11 | 1.81E-06   | 0.909 | 0.985 |
| RPS21        | 8 | -0.3109553 | 4.10E-17 | 7.49E-13   | 1     | 1     |
| PLP2         | 8 | -0.3114313 | 2.72E-07 | 0.0049552  | 0.506 | 0.783 |
| TMED3        | 8 | -0.3115963 | 3.47E-07 | 0.00633046 | 0.532 | 0.763 |
| GYPC         | 8 | -0.3119206 | 2.13E-07 | 0.00387893 | 0.234 | 0.495 |
| PSMB4        | 8 | -0.3120735 | 9.21E-09 | 0.00016799 | 0.208 | 0.49  |
| RPL28        | 8 | -0.3132025 | 5.81E-23 | 1.06E-18   | 1     | 1     |
| CHID1        | 8 | -0.313407  | 2.94E-07 | 0.00535565 | 0.519 | 0.768 |
| KDELR2       | 8 | -0.3163551 | 1.94E-08 | 0.00035466 | 0.844 | 0.98  |
| CREG1        | 8 | -0.3166696 | 3.59E-07 | 0.00654555 | 0.429 | 0.667 |
| MPP6         | 8 | -0.3171903 | 3.52E-09 | 6.42E-05   | 0.201 | 0.5   |
| GLTSCR2      | 8 | -0.3180385 | 1.38E-08 | 0.00025127 | 0.792 | 0.965 |
| RCN3         | 8 | -0.3181651 | 8.18E-07 | 0.0149333  | 0.403 | 0.657 |
| PRDX4        | 8 | -0.3184537 | 3.77E-07 | 0.00688466 | 0.753 | 0.934 |
| AC003090.1   | 8 | -0.318739  | 8.16E-09 | 0.00014898 | 0.117 | 0.384 |
| NACA         | 8 | -0.3199095 | 2.95E-15 | 5.38E-11   | 1     | 1     |
| RHOBTB3      | 8 | -0.3202158 | 6.95E-07 | 0.01268    | 0.747 | 0.904 |
| RPL35A       | 8 | -0.321003  | 3.09E-22 | 5.64E-18   | 1     | 1     |
| ALDOC        | 8 | -0.3212048 | 1.31E-06 | 0.02386808 | 0.221 | 0.455 |
| CCDC8        | 8 | -0.3223312 | 7.55E-09 | 0.00013778 | 0.169 | 0.449 |
| TAF1D        | 8 | -0.3237871 | 4.99E-08 | 0.00091062 | 0.344 | 0.626 |
| RPS19        | 8 | -0.323841  | 4.26E-20 | 7.77E-16   | 1     | 1     |
| ATRNL1       | 8 | -0.3260968 | 5.07E-07 | 0.00924912 | 0.156 | 0.384 |
| GLO1         | 8 | -0.3265219 | 2.54E-10 | 4.63E-06   | 0.247 | 0.581 |
| ERGIC3       | 8 | -0.3269092 | 7.78E-09 | 0.00014191 | 0.792 | 0.929 |
| RP11-71N10.1 | 8 | -0.3289918 | 2.35E-11 | 4.29E-07   | 0.039 | 0.333 |
| TCF4         | 8 | -0.3292642 | 2.44E-08 | 0.00044475 | 0.409 | 0.697 |
| RPL10        | 8 | -0.3293027 | 2.38E-22 | 4.35E-18   | 1     | 1     |
| MYL12B       | 8 | -0.3294339 | 4.53E-07 | 0.00826078 | 0.539 | 0.758 |
| ATP5G2       | 8 | -0.3307673 | 1.39E-09 | 2.53E-05   | 1     | 0.995 |
| C10orf54     | 8 | -0.3318319 | 2.90E-10 | 5.29E-06   | 0.091 | 0.379 |
| PGAM1        | 8 | -0.3349696 | 1.54E-09 | 2.81E-05   | 0.773 | 0.934 |
| PPIA         | 8 | -0.3364722 | 2.88E-10 | 5.26E-06   | 0.942 | 0.985 |
| PPT1         | 8 | -0.3364722 | 2.01E-08 | 0.00036612 | 0.37  | 0.641 |

|          |   |            |          |            |       |       |
|----------|---|------------|----------|------------|-------|-------|
| ATP5H    | 8 | -0.3368899 | 7.91E-08 | 0.00144294 | 0.481 | 0.712 |
| TOMM7    | 8 | -0.3381715 | 4.35E-19 | 7.94E-15   | 1     | 1     |
| LDHA     | 8 | -0.3387465 | 7.27E-10 | 1.33E-05   | 0.968 | 1     |
| CAV1     | 8 | -0.3391323 | 1.26E-07 | 0.00229716 | 0.474 | 0.717 |
| YBX1     | 8 | -0.3410611 | 4.18E-13 | 7.62E-09   | 0.987 | 1     |
| SLC44A1  | 8 | -0.3411342 | 2.43E-06 | 0.04425488 | 0.312 | 0.535 |
| RPS23    | 8 | -0.3414105 | 4.41E-23 | 8.04E-19   | 1     | 1     |
| CD63     | 8 | -0.341513  | 3.24E-10 | 5.92E-06   | 1     | 1     |
| EIF3K    | 8 | -0.3416842 | 1.03E-09 | 1.88E-05   | 0.721 | 0.934 |
| RHOA     | 8 | -0.3416842 | 9.08E-08 | 0.00165652 | 0.695 | 0.894 |
| EIF2A    | 8 | -0.3456889 | 2.54E-09 | 4.63E-05   | 0.532 | 0.793 |
| MDH2     | 8 | -0.3460417 | 8.49E-09 | 0.000155   | 0.286 | 0.566 |
| PRDX5    | 8 | -0.3461075 | 3.13E-09 | 5.70E-05   | 0.825 | 0.944 |
| AP2M1    | 8 | -0.3463288 | 6.75E-09 | 0.00012317 | 0.416 | 0.702 |
| PPA1     | 8 | -0.3477354 | 7.62E-10 | 1.39E-05   | 0.26  | 0.576 |
| KHDRBS3  | 8 | -0.3478038 | 2.53E-12 | 4.62E-08   | 0.013 | 0.298 |
| PKM      | 8 | -0.3487791 | 3.94E-09 | 7.19E-05   | 0.935 | 0.97  |
| HNRNPA1  | 8 | -0.3498286 | 2.34E-12 | 4.27E-08   | 1     | 0.995 |
| CYBRD1   | 8 | -0.3537513 | 4.36E-09 | 7.95E-05   | 0.396 | 0.697 |
| RPL8     | 8 | -0.3551683 | 9.72E-28 | 1.77E-23   | 1     | 1     |
| C12orf57 | 8 | -0.3561653 | 8.01E-14 | 1.46E-09   | 0.922 | 0.995 |
| EEF1D    | 8 | -0.3563875 | 1.83E-16 | 3.34E-12   | 1     | 1     |
| NFIA     | 8 | -0.3571497 | 9.97E-09 | 0.00018201 | 0.364 | 0.646 |
| RPL29    | 8 | -0.3574982 | 2.64E-24 | 4.82E-20   | 1     | 1     |
| H3F3A    | 8 | -0.3577147 | 2.55E-15 | 4.65E-11   | 0.987 | 1     |
| NKX3-2   | 8 | -0.3605698 | 4.21E-08 | 0.00076773 | 0.214 | 0.49  |
| ATP2B1   | 8 | -0.3609807 | 9.05E-09 | 0.0001652  | 0.221 | 0.53  |
| SLC25A6  | 8 | -0.3609807 | 7.93E-12 | 1.45E-07   | 0.916 | 0.995 |
| TSPAN4   | 8 | -0.3613182 | 4.60E-07 | 0.00839014 | 0.487 | 0.697 |
| LTA4H    | 8 | -0.3619963 | 5.68E-10 | 1.04E-05   | 0.24  | 0.551 |
| RPS27    | 8 | -0.362322  | 9.83E-26 | 1.79E-21   | 1     | 1     |
| PABPC1   | 8 | -0.3643863 | 3.61E-10 | 6.60E-06   | 0.844 | 0.96  |
| TMED10   | 8 | -0.364648  | 5.94E-10 | 1.08E-05   | 0.89  | 0.99  |
| LECT1    | 8 | -0.3658545 | 6.26E-07 | 0.01143126 | 0.994 | 0.995 |
| RPS29    | 8 | -0.3677831 | 4.51E-26 | 8.23E-22   | 1     | 1     |
| TSPO     | 8 | -0.3678691 | 3.36E-13 | 6.14E-09   | 0.805 | 0.955 |
| CCPG1    | 8 | -0.3682987 | 1.67E-07 | 0.00304767 | 0.461 | 0.712 |
| IDI1     | 8 | -0.3686293 | 3.75E-07 | 0.00684726 | 0.403 | 0.631 |
| MT-ND4   | 8 | -0.3688302 | 2.42E-08 | 0.00044145 | 0.987 | 0.99  |

|          |   |            |          |            |       |       |
|----------|---|------------|----------|------------|-------|-------|
| UBA52    | 8 | -0.3692521 | 3.73E-25 | 6.80E-21   | 1     | 1     |
| SERPINA5 | 8 | -0.370881  | 4.66E-07 | 0.00850469 | 0.779 | 0.914 |
| RPL9     | 8 | -0.3724849 | 2.15E-25 | 3.92E-21   | 1     | 1     |
| RPL31    | 8 | -0.3734112 | 2.16E-22 | 3.93E-18   | 1     | 1     |
| CNBP     | 8 | -0.3737793 | 5.49E-09 | 0.00010025 | 0.643 | 0.823 |
| UQCRH    | 8 | -0.3741816 | 1.27E-13 | 2.32E-09   | 0.948 | 0.995 |
| RPL19    | 8 | -0.3746111 | 1.32E-33 | 2.42E-29   | 1     | 1     |
| RPS2     | 8 | -0.3752216 | 7.63E-26 | 1.39E-21   | 1     | 1     |
| ARL6IP5  | 8 | -0.3753121 | 5.99E-08 | 0.0010928  | 0.545 | 0.758 |
| GPC1     | 8 | -0.375343  | 6.39E-12 | 1.17E-07   | 0.11  | 0.439 |
| NGFRAP1  | 8 | -0.3755834 | 4.91E-12 | 8.96E-08   | 0.922 | 0.985 |
| RPS7     | 8 | -0.3757011 | 2.21E-22 | 4.03E-18   | 1     | 1     |
| GAS6     | 8 | -0.3757132 | 6.41E-09 | 0.000117   | 0.266 | 0.566 |
| RPL35    | 8 | -0.3770786 | 1.42E-24 | 2.60E-20   | 1     | 1     |
| RPLP2    | 8 | -0.3795162 | 5.37E-31 | 9.80E-27   | 1     | 1     |
| ZBTB20   | 8 | -0.3797603 | 1.11E-08 | 0.0002018  | 0.331 | 0.596 |
| ATP5O    | 8 | -0.3797744 | 4.90E-10 | 8.95E-06   | 0.656 | 0.869 |
| RPL18A   | 8 | -0.3798619 | 1.55E-28 | 2.82E-24   | 1     | 1     |
| ATP5F1   | 8 | -0.3801392 | 3.32E-08 | 0.00060541 | 0.383 | 0.626 |
| HOXB6    | 8 | -0.381513  | 6.15E-10 | 1.12E-05   | 0.253 | 0.566 |
| MT-CO2   | 8 | -0.3822914 | 5.15E-10 | 9.39E-06   | 0.968 | 0.99  |
| PRDX2    | 8 | -0.3857149 | 2.45E-09 | 4.47E-05   | 0.604 | 0.828 |
| LRPAP1   | 8 | -0.3859523 | 6.91E-08 | 0.00126158 | 0.494 | 0.707 |
| EIF3M    | 8 | -0.386617  | 1.10E-09 | 2.01E-05   | 0.37  | 0.677 |
| RPL23A   | 8 | -0.3871347 | 1.72E-26 | 3.14E-22   | 1     | 1     |
| EIF3F    | 8 | -0.3874715 | 3.23E-11 | 5.90E-07   | 0.662 | 0.904 |
| RPL34    | 8 | -0.3880917 | 1.40E-24 | 2.55E-20   | 1     | 1     |
| COX7C    | 8 | -0.3903705 | 3.98E-19 | 7.26E-15   | 1     | 1     |
| RGS10    | 8 | -0.3905395 | 2.90E-09 | 5.30E-05   | 0.318 | 0.586 |
| ACTB     | 8 | -0.3927261 | 5.94E-07 | 0.01083916 | 0.838 | 0.909 |
| SQLE     | 8 | -0.392917  | 2.59E-06 | 0.04732784 | 0.214 | 0.429 |
| GNB2L1   | 8 | -0.3930294 | 3.21E-17 | 5.85E-13   | 0.994 | 1     |
| MEG3     | 8 | -0.3945121 | 3.80E-07 | 0.0069328  | 0.338 | 0.576 |
| RPL13A   | 8 | -0.3949347 | 9.14E-32 | 1.67E-27   | 1     | 1     |
| ARHGAP29 | 8 | -0.3962066 | 1.90E-07 | 0.0034706  | 0.273 | 0.51  |
| DDOST    | 8 | -0.3969822 | 1.08E-08 | 0.00019732 | 0.331 | 0.606 |
| RPS27A   | 8 | -0.3971926 | 2.19E-29 | 4.00E-25   | 1     | 1     |
| ITM2A    | 8 | -0.3992731 | 7.36E-08 | 0.00134215 | 0.584 | 0.808 |
| ARPC2    | 8 | -0.3998496 | 3.00E-09 | 5.47E-05   | 0.649 | 0.889 |

|              |   |            |          |            |       |       |
|--------------|---|------------|----------|------------|-------|-------|
| ST13         | 8 | -0.3999367 | 3.43E-13 | 6.27E-09   | 0.896 | 0.955 |
| FXVD5        | 8 | -0.4003822 | 2.45E-09 | 4.47E-05   | 0.753 | 0.914 |
| C14orf166    | 8 | -0.4027347 | 7.59E-12 | 1.38E-07   | 0.597 | 0.848 |
| CXXC5        | 8 | -0.4044063 | 4.52E-07 | 0.00824968 | 0.448 | 0.631 |
| ARL2BP       | 8 | -0.4046537 | 4.29E-10 | 7.82E-06   | 0.442 | 0.732 |
| GSTP1        | 8 | -0.4049726 | 2.36E-12 | 4.31E-08   | 0.916 | 0.99  |
| NAP1L1       | 8 | -0.4054035 | 1.05E-14 | 1.91E-10   | 0.909 | 0.98  |
| TKT          | 8 | -0.4064934 | 8.02E-10 | 1.46E-05   | 0.286 | 0.596 |
| RPS5         | 8 | -0.4079592 | 1.74E-27 | 3.17E-23   | 1     | 1     |
| RPSA         | 8 | -0.4099203 | 1.48E-20 | 2.70E-16   | 1     | 1     |
| ATP5A1       | 8 | -0.4103341 | 3.44E-10 | 6.28E-06   | 0.429 | 0.722 |
| EPB41L4A-AS1 | 8 | -0.4106614 | 2.83E-09 | 5.16E-05   | 0.669 | 0.879 |
| LGALS1       | 8 | -0.411466  | 9.30E-09 | 0.00016964 | 0.994 | 0.98  |
| HERPUD1      | 8 | -0.4169352 | 1.40E-06 | 0.02560144 | 0.513 | 0.742 |
| ALDOA        | 8 | -0.4177835 | 5.74E-15 | 1.05E-10   | 0.981 | 1     |
| HSPA8        | 8 | -0.4195601 | 2.87E-11 | 5.23E-07   | 0.299 | 0.657 |
| TXNIP        | 8 | -0.420523  | 2.59E-12 | 4.72E-08   | 0.065 | 0.389 |
| UQCRB        | 8 | -0.4218834 | 5.63E-15 | 1.03E-10   | 0.968 | 0.995 |
| RPS18        | 8 | -0.4219327 | 3.71E-35 | 6.77E-31   | 1     | 1     |
| SSPN         | 8 | -0.4231406 | 3.82E-10 | 6.97E-06   | 0.305 | 0.611 |
| VDAC2        | 8 | -0.4232946 | 5.17E-10 | 9.44E-06   | 0.403 | 0.677 |
| EEF1B2       | 8 | -0.4268699 | 2.23E-17 | 4.08E-13   | 0.981 | 1     |
| HIST1H1C     | 8 | -0.4307215 | 4.42E-08 | 0.00080629 | 0.13  | 0.384 |
| PDIA3        | 8 | -0.4330479 | 1.26E-08 | 0.00023018 | 0.61  | 0.803 |
| C14orf1      | 8 | -0.4344162 | 1.98E-13 | 3.61E-09   | 0.247 | 0.636 |
| B2M          | 8 | -0.4353181 | 3.30E-16 | 6.02E-12   | 1     | 1     |
| EIF1         | 8 | -0.4374047 | 5.28E-19 | 9.64E-15   | 1     | 1     |
| HDLBP        | 8 | -0.4436297 | 2.21E-11 | 4.03E-07   | 0.513 | 0.763 |
| PRDX6        | 8 | -0.4449529 | 8.30E-13 | 1.51E-08   | 0.584 | 0.859 |
| NINJ1        | 8 | -0.4475854 | 1.03E-10 | 1.88E-06   | 0.442 | 0.717 |
| RPL10A       | 8 | -0.4482526 | 1.43E-29 | 2.60E-25   | 1     | 1     |
| HNRNPC       | 8 | -0.4486355 | 2.87E-14 | 5.24E-10   | 0.532 | 0.854 |
| FBXO2        | 8 | -0.4502432 | 7.95E-15 | 1.45E-10   | 0.838 | 0.98  |
| RPS13        | 8 | -0.4503723 | 2.44E-29 | 4.46E-25   | 1     | 1     |
| RPS3A        | 8 | -0.4515435 | 1.59E-33 | 2.90E-29   | 1     | 1     |
| SSR3         | 8 | -0.4521068 | 3.30E-13 | 6.02E-09   | 0.89  | 0.975 |
| TPT1         | 8 | -0.4528062 | 6.10E-29 | 1.11E-24   | 1     | 1     |
| CLEC3A       | 8 | -0.4548707 | 6.33E-11 | 1.15E-06   | 0.734 | 0.909 |
| NPM1         | 8 | -0.4585543 | 7.60E-15 | 1.39E-10   | 1     | 1     |



|          |   |            |          |            |       |       |
|----------|---|------------|----------|------------|-------|-------|
| ZFP36L2  | 8 | -0.4607778 | 6.84E-11 | 1.25E-06   | 0.136 | 0.455 |
| NPC2     | 8 | -0.4609538 | 3.81E-14 | 6.95E-10   | 0.929 | 1     |
| CALM1    | 8 | -0.4614938 | 2.23E-10 | 4.07E-06   | 0.455 | 0.737 |
| MT-CO3   | 8 | -0.4659681 | 1.03E-09 | 1.87E-05   | 0.974 | 0.965 |
| RPL37    | 8 | -0.4669149 | 2.72E-35 | 4.96E-31   | 1     | 1     |
| SLC25A3  | 8 | -0.4676914 | 1.29E-15 | 2.35E-11   | 0.753 | 0.97  |
| IGFBP7   | 8 | -0.4693866 | 4.48E-09 | 8.17E-05   | 0.818 | 0.934 |
| GNAS     | 8 | -0.4696553 | 2.96E-13 | 5.40E-09   | 0.617 | 0.859 |
| HLA-B    | 8 | -0.4726747 | 6.67E-10 | 1.22E-05   | 0.734 | 0.864 |
| CCNI     | 8 | -0.4768585 | 3.22E-21 | 5.88E-17   | 0.987 | 1     |
| HSP90AA1 | 8 | -0.4771602 | 3.26E-11 | 5.95E-07   | 0.494 | 0.798 |
| HOXC10   | 8 | -0.4791704 | 5.13E-14 | 9.37E-10   | 0.513 | 0.833 |
| RPS8     | 8 | -0.4811669 | 7.73E-37 | 1.41E-32   | 1     | 1     |
| YBX3     | 8 | -0.4815731 | 5.12E-17 | 9.35E-13   | 0.662 | 0.97  |
| MT-ND1   | 8 | -0.4817655 | 1.37E-07 | 0.00250064 | 0.74  | 0.879 |
| MT-ATP6  | 8 | -0.4819841 | 2.36E-08 | 0.00043067 | 0.929 | 0.96  |
| EIF3L    | 8 | -0.4834188 | 4.44E-17 | 8.11E-13   | 0.773 | 0.97  |
| BTF3     | 8 | -0.4838875 | 9.14E-23 | 1.67E-18   | 0.968 | 1     |
| EEF2     | 8 | -0.4846274 | 1.06E-13 | 1.93E-09   | 0.981 | 0.995 |
| EIF4B    | 8 | -0.4858243 | 2.31E-13 | 4.21E-09   | 0.669 | 0.919 |
| RPL4     | 8 | -0.4860006 | 4.09E-28 | 7.47E-24   | 1     | 1     |
| PEBP1    | 8 | -0.4860532 | 2.76E-13 | 5.03E-09   | 0.649 | 0.894 |
| CITED2   | 8 | -0.4866309 | 8.11E-09 | 0.00014797 | 0.377 | 0.652 |
| RPS16    | 8 | -0.4935143 | 1.81E-36 | 3.30E-32   | 1     | 1     |
| RPL14    | 8 | -0.4942292 | 1.93E-33 | 3.51E-29   | 1     | 1     |
| RPL23    | 8 | -0.4963619 | 4.07E-28 | 7.42E-24   | 0.994 | 1     |
| SEC11A   | 8 | -0.4969735 | 1.86E-18 | 3.40E-14   | 0.812 | 0.965 |
| HSP90AB1 | 8 | -0.4970954 | 1.06E-12 | 1.94E-08   | 0.883 | 0.975 |
| SLC14A1  | 8 | -0.4981857 | 3.69E-13 | 6.72E-09   | 0.221 | 0.606 |
| SLC40A1  | 8 | -0.5051142 | 7.22E-08 | 0.00131718 | 0.234 | 0.475 |
| RPS17    | 8 | -0.5054679 | 1.18E-35 | 2.15E-31   | 1     | 1     |
| RPL30    | 8 | -0.5067083 | 4.05E-35 | 7.39E-31   | 1     | 1     |
| MYLK     | 8 | -0.513009  | 9.13E-10 | 1.67E-05   | 0.357 | 0.646 |
| CTGF     | 8 | -0.5156715 | 2.35E-07 | 0.00429549 | 0.448 | 0.717 |
| MSMO1    | 8 | -0.5179229 | 1.64E-09 | 2.99E-05   | 0.273 | 0.581 |
| PDIA6    | 8 | -0.5222188 | 2.97E-16 | 5.42E-12   | 0.76  | 0.96  |
| PLXDC2   | 8 | -0.526598  | 2.41E-15 | 4.40E-11   | 0.487 | 0.793 |
| PTRF     | 8 | -0.5309605 | 3.92E-13 | 7.16E-09   | 0.383 | 0.697 |
| MT-CO1   | 8 | -0.5315051 | 3.08E-12 | 5.62E-08   | 0.994 | 0.99  |

|          |   |            |          |            |       |       |
|----------|---|------------|----------|------------|-------|-------|
| TUBB2B   | 8 | -0.5326392 | 1.64E-10 | 2.99E-06   | 0.39  | 0.697 |
| HINT1    | 8 | -0.5343356 | 1.52E-23 | 2.78E-19   | 0.948 | 0.995 |
| TUBB     | 8 | -0.5352243 | 3.07E-14 | 5.60E-10   | 0.558 | 0.859 |
| RPL18    | 8 | -0.5360652 | 6.48E-37 | 1.18E-32   | 1     | 1     |
| HLA-C    | 8 | -0.5431284 | 2.54E-15 | 4.63E-11   | 0.792 | 0.975 |
| LDHB     | 8 | -0.5500083 | 1.07E-19 | 1.95E-15   | 0.617 | 0.919 |
| P4HB     | 8 | -0.5500834 | 2.14E-17 | 3.91E-13   | 0.89  | 0.995 |
| PSMA7    | 8 | -0.5507268 | 1.98E-16 | 3.61E-12   | 0.558 | 0.894 |
| PAX1     | 8 | -0.5511998 | 6.66E-15 | 1.22E-10   | 0.669 | 0.909 |
| IGFBP6   | 8 | -0.5562173 | 8.68E-09 | 0.00015839 | 0.701 | 0.859 |
| RPL7     | 8 | -0.5586737 | 5.70E-35 | 1.04E-30   | 1     | 1     |
| APOD     | 8 | -0.5596158 | 1.60E-09 | 2.91E-05   | 0.201 | 0.475 |
| VIM      | 8 | -0.5603206 | 5.53E-12 | 1.01E-07   | 0.994 | 1     |
| SSR2     | 8 | -0.5605986 | 7.45E-21 | 1.36E-16   | 0.792 | 0.985 |
| COL2A1   | 8 | -0.5668463 | 1.87E-13 | 3.41E-09   | 1     | 1     |
| FHL1     | 8 | -0.5753641 | 3.42E-15 | 6.25E-11   | 0.286 | 0.662 |
| ISLR     | 8 | -0.5794972 | 2.80E-14 | 5.11E-10   | 0.591 | 0.848 |
| NUCB2    | 8 | -0.5912102 | 9.22E-13 | 1.68E-08   | 0.494 | 0.783 |
| THY1     | 8 | -0.5922866 | 1.58E-14 | 2.88E-10   | 0.409 | 0.742 |
| EEF1A1   | 8 | -0.5997358 | 3.25E-37 | 5.94E-33   | 1     | 1     |
| CHRD2    | 8 | -0.6067074 | 7.63E-11 | 1.39E-06   | 0.214 | 0.525 |
| INSIG1   | 8 | -0.6076498 | 2.19E-10 | 3.99E-06   | 0.383 | 0.692 |
| HLA-A    | 8 | -0.6114959 | 3.82E-15 | 6.97E-11   | 0.786 | 0.965 |
| CCDC102B | 8 | -0.620081  | 9.47E-21 | 1.73E-16   | 0.058 | 0.525 |
| SDC2     | 8 | -0.6202638 | 5.47E-23 | 9.98E-19   | 0.87  | 0.985 |
| CRIP2    | 8 | -0.6303216 | 2.29E-17 | 4.19E-13   | 0.344 | 0.727 |
| MSMP     | 8 | -0.6398102 | 6.15E-07 | 0.011229   | 0.058 | 0.263 |
| CRTAP    | 8 | -0.6441903 | 2.47E-24 | 4.51E-20   | 0.61  | 0.949 |
| SPINT2   | 8 | -0.6575413 | 7.26E-22 | 1.32E-17   | 0.156 | 0.662 |
| CD9      | 8 | -0.6627096 | 2.62E-13 | 4.77E-09   | 0.448 | 0.717 |
| TPM1     | 8 | -0.6657033 | 2.86E-12 | 5.23E-08   | 0.455 | 0.742 |
| C2orf82  | 8 | -0.6733503 | 1.82E-18 | 3.33E-14   | 0.955 | 1     |
| MT-ND3   | 8 | -0.6832605 | 1.33E-18 | 2.43E-14   | 0.896 | 0.949 |
| RPLP0    | 8 | -0.7026403 | 3.77E-49 | 6.87E-45   | 1     | 1     |
| ZFAS1    | 8 | -0.7028711 | 8.40E-26 | 1.53E-21   | 0.987 | 1     |
| PLPP1    | 8 | -0.7034236 | 3.33E-14 | 6.07E-10   | 0.227 | 0.591 |
| MT-CYB   | 8 | -0.7343252 | 5.95E-17 | 1.09E-12   | 0.805 | 0.949 |
| ACTG1    | 8 | -0.7361442 | 3.47E-22 | 6.33E-18   | 0.851 | 0.98  |
| SPARC    | 8 | -0.7531308 | 7.15E-22 | 1.31E-17   | 0.909 | 1     |

| MT-ND2    | 8       | -0.7679073 | 2.06E-13 | 3.75E-09   | 0.779 | 0.889 |
|-----------|---------|------------|----------|------------|-------|-------|
| EIF3H     | 8       | -0.875105  | 8.13E-38 | 1.48E-33   | 0.883 | 1     |
| OGN       | 8       | -0.8852488 | 1.31E-20 | 2.39E-16   | 0.961 | 0.995 |
| ADIRF     | 8       | -0.9262863 | 4.99E-21 | 9.10E-17   | 0.409 | 0.823 |
| RPS20     | 8       | -0.9404279 | 8.33E-53 | 1.52E-48   | 0.994 | 1     |
| RPS11     | 8       | -0.9616252 | 1.38E-54 | 2.52E-50   | 0.987 | 1     |
| FTH1      | 8       | -1.0136604 | 1.13E-49 | 2.07E-45   | 1     | 1     |
| CAPS      | 8       | -1.0459003 | 1.40E-32 | 2.55E-28   | 0.74  | 0.99  |
| CRISPLD1  | 8       | -1.267277  | 1.32E-27 | 2.42E-23   | 0.318 | 0.798 |
| FRZB      | 8       | -1.5388665 | 1.78E-23 | 3.25E-19   | 0.422 | 0.833 |
| SPTSSB    | 8       | -1.7710606 | 5.27E-38 | 9.62E-34   | 0.019 | 0.727 |
| gene      | cluster | avg_logFC  | p_val    | p_val_adj  | pct.1 | pct.2 |
| EPYC      | 9       | 1.75101624 | 3.49E-18 | 6.36E-14   | 0.901 | 0.386 |
| TGFBI     | 9       | 1.65259324 | 1.68E-21 | 3.07E-17   | 0.96  | 0.53  |
| CTHRC1    | 9       | 1.55141957 | 7.65E-21 | 1.40E-16   | 0.861 | 0.289 |
| PLA2G2A   | 9       | 1.52054076 | 1.83E-10 | 3.33E-06   | 0.752 | 0.337 |
| CHI3L2    | 9       | 1.43311262 | 3.91E-14 | 7.14E-10   | 0.901 | 0.542 |
| CYP1B1    | 9       | 1.17436468 | 7.31E-12 | 1.33E-07   | 0.673 | 0.205 |
| PRG4      | 9       | 1.14109865 | 1.22E-11 | 2.23E-07   | 0.743 | 0.265 |
| CFD       | 9       | 1.06166442 | 2.69E-11 | 4.91E-07   | 0.574 | 0.096 |
| TNFRSF11B | 9       | 1.01891996 | 1.37E-08 | 0.00025084 | 0.782 | 0.458 |
| SPP1      | 9       | 0.99619852 | 5.29E-10 | 9.65E-06   | 0.554 | 0.108 |
| MT1X      | 9       | 0.93070173 | 5.18E-08 | 0.0009443  | 1     | 0.976 |
| PTGS2     | 9       | 0.71339558 | 1.20E-07 | 0.00219285 | 0.436 | 0.096 |
| VEGFA     | 9       | 0.70817637 | 1.91E-06 | 0.03488384 | 0.683 | 0.386 |
| COMP      | 9       | 0.70555709 | 6.32E-08 | 0.00115259 | 0.98  | 0.88  |
| CTSD      | 9       | 0.70037757 | 1.51E-07 | 0.00276043 | 1     | 0.976 |
| BTG1      | 9       | 0.63458452 | 3.65E-08 | 0.00066653 | 0.98  | 0.831 |
| PMP22     | 9       | 0.58253983 | 5.45E-08 | 0.00099446 | 0.901 | 0.711 |
| PPP3CA    | 9       | 0.56058309 | 5.29E-07 | 0.00964799 | 0.871 | 0.627 |
| TNFAIP6   | 9       | 0.51321641 | 4.99E-07 | 0.00910542 | 0.406 | 0.084 |
| EVI2A     | 9       | 0.45531827 | 1.73E-08 | 0.00031573 | 0.386 | 0.036 |
| LTBP1     | 9       | 0.44660544 | 1.47E-07 | 0.00268698 | 0.554 | 0.169 |
| DDIT4L    | 9       | 0.40671617 | 2.16E-06 | 0.0393943  | 0.564 | 0.205 |
| PLA2G4A   | 9       | 0.39723743 | 1.03E-06 | 0.01870794 | 0.634 | 0.277 |
| RPL19     | 9       | -0.2625759 | 1.99E-07 | 0.00363488 | 1     | 1     |
| RPL13     | 9       | -0.2710991 | 2.93E-07 | 0.00534952 | 1     | 1     |
| RPL7A     | 9       | -0.2715573 | 1.53E-07 | 0.00279328 | 1     | 1     |
| RPL15     | 9       | -0.2729993 | 5.49E-07 | 0.01001629 | 1     | 1     |

|        |   |            |          |            |       |       |
|--------|---|------------|----------|------------|-------|-------|
| UBA52  | 9 | -0.2829863 | 4.29E-08 | 0.000783   | 1     | 1     |
| MAEA   | 9 | -0.2840555 | 2.15E-06 | 0.03915723 | 0.069 | 0.349 |
| RPL6   | 9 | -0.2852893 | 2.69E-06 | 0.04907257 | 1     | 1     |
| COX7C  | 9 | -0.2914437 | 1.74E-06 | 0.03181502 | 1     | 1     |
| RPL8   | 9 | -0.2943702 | 3.15E-09 | 5.75E-05   | 1     | 1     |
| RPS18  | 9 | -0.2988002 | 7.45E-07 | 0.01359545 | 1     | 1     |
| EIF1   | 9 | -0.2993651 | 4.32E-07 | 0.00788929 | 1     | 1     |
| CLEC3B | 9 | -0.2996583 | 1.98E-07 | 0.00361132 | 0     | 0.241 |
| GFRA1  | 9 | -0.2996583 | 4.34E-07 | 0.00791839 | 0     | 0.229 |
| RPLP1  | 9 | -0.3005753 | 9.71E-07 | 0.01772613 | 1     | 1     |
| MXD4   | 9 | -0.3035254 | 1.56E-07 | 0.00284724 | 0.05  | 0.349 |
| HOXC8  | 9 | -0.3060948 | 1.39E-06 | 0.02535878 | 0.109 | 0.41  |
| RPS29  | 9 | -0.3106572 | 3.24E-07 | 0.00591569 | 1     | 1     |
| RPL35A | 9 | -0.3118305 | 9.79E-08 | 0.00178653 | 1     | 1     |
| RPS13  | 9 | -0.3195726 | 2.49E-06 | 0.04540455 | 1     | 1     |
| GNB2L1 | 9 | -0.3227937 | 8.84E-09 | 0.00016125 | 1     | 1     |
| H3F3A  | 9 | -0.3246611 | 6.84E-07 | 0.01248897 | 0.98  | 1     |
| RPL13A | 9 | -0.3255522 | 1.12E-07 | 0.00204761 | 1     | 1     |
| RPL18A | 9 | -0.3259795 | 5.89E-07 | 0.01074698 | 1     | 1     |
| OAZ1   | 9 | -0.3294932 | 4.57E-07 | 0.00833934 | 1     | 1     |
| RPL4   | 9 | -0.3333544 | 2.00E-06 | 0.03645255 | 0.99  | 1     |
| RAC1   | 9 | -0.3452222 | 1.54E-07 | 0.00280749 | 0.901 | 0.964 |
| RPS27A | 9 | -0.3466923 | 1.47E-07 | 0.0026772  | 1     | 1     |
| KLHDC2 | 9 | -0.3482961 | 5.06E-07 | 0.00923485 | 0.257 | 0.614 |
| RPL10A | 9 | -0.3537772 | 7.47E-09 | 0.00013635 | 1     | 1     |
| RPSA   | 9 | -0.3637129 | 1.68E-06 | 0.03071885 | 0.99  | 1     |
| EIF3K  | 9 | -0.3672377 | 5.67E-07 | 0.01035264 | 0.723 | 0.892 |
| RPL29  | 9 | -0.3737938 | 1.88E-11 | 3.44E-07   | 1     | 1     |
| RPL10  | 9 | -0.3773078 | 6.23E-11 | 1.14E-06   | 1     | 1     |
| RPL9   | 9 | -0.3787269 | 6.80E-09 | 0.00012413 | 1     | 1     |
| HNRNPC | 9 | -0.3853812 | 3.54E-07 | 0.00646081 | 0.703 | 0.904 |
| EIF3L  | 9 | -0.3894124 | 1.10E-07 | 0.00201127 | 0.683 | 0.928 |
| BTF3   | 9 | -0.3898318 | 3.18E-08 | 0.0005799  | 0.97  | 0.988 |
| RPL23  | 9 | -0.3959199 | 4.67E-10 | 8.52E-06   | 1     | 1     |
| RPL14  | 9 | -0.3959538 | 8.11E-11 | 1.48E-06   | 1     | 1     |
| MYL6   | 9 | -0.3986484 | 1.33E-06 | 0.02420038 | 0.99  | 0.988 |
| RPLP2  | 9 | -0.4034858 | 1.67E-11 | 3.04E-07   | 1     | 1     |
| RPL31  | 9 | -0.4037185 | 1.94E-07 | 0.00353342 | 1     | 1     |
| RPL34  | 9 | -0.4072099 | 9.59E-08 | 0.00175005 | 1     | 1     |

|          |   |            |          |            |       |       |
|----------|---|------------|----------|------------|-------|-------|
| CCDC8    | 9 | -0.4141924 | 2.35E-08 | 0.00042831 | 0.129 | 0.494 |
| RPS16    | 9 | -0.4156781 | 4.74E-11 | 8.66E-07   | 1     | 1     |
| PDLIM2   | 9 | -0.4214832 | 8.28E-07 | 0.01510057 | 0.584 | 0.807 |
| RPL23A   | 9 | -0.4230447 | 1.30E-10 | 2.38E-06   | 1     | 1     |
| RPL30    | 9 | -0.4272478 | 7.10E-11 | 1.30E-06   | 1     | 1     |
| RPS3A    | 9 | -0.4274071 | 2.47E-10 | 4.51E-06   | 1     | 1     |
| TMEM106C | 9 | -0.4302177 | 1.82E-07 | 0.00332166 | 0.208 | 0.578 |
| CCNI     | 9 | -0.433006  | 1.34E-07 | 0.0024435  | 0.97  | 1     |
| RPL37    | 9 | -0.4368101 | 3.12E-11 | 5.70E-07   | 1     | 1     |
| C14orf1  | 9 | -0.4442967 | 4.07E-07 | 0.00743095 | 0.267 | 0.602 |
| YBX1     | 9 | -0.4487252 | 3.21E-08 | 0.00058614 | 0.96  | 0.976 |
| ITGA11   | 9 | -0.454109  | 2.20E-08 | 0.00040213 | 0.158 | 0.53  |
| ARPC2    | 9 | -0.4544203 | 5.36E-07 | 0.00977806 | 0.822 | 0.94  |
| RPS17    | 9 | -0.4571854 | 4.39E-12 | 8.00E-08   | 1     | 1     |
| RPS8     | 9 | -0.458318  | 2.20E-10 | 4.02E-06   | 1     | 1     |
| NPDC1    | 9 | -0.4617164 | 8.65E-10 | 1.58E-05   | 0.208 | 0.639 |
| CCDC102B | 9 | -0.4634835 | 4.85E-07 | 0.0088527  | 0.089 | 0.386 |
| ITGBL1   | 9 | -0.4762399 | 7.86E-08 | 0.00143361 | 0.228 | 0.602 |
| HRCT1    | 9 | -0.4769933 | 3.42E-08 | 0.0006249  | 0.05  | 0.373 |
| FTH1     | 9 | -0.4788923 | 2.02E-10 | 3.68E-06   | 1     | 1     |
| FADS1    | 9 | -0.4817857 | 1.83E-07 | 0.00333516 | 0.109 | 0.434 |
| MEG3     | 9 | -0.498282  | 3.60E-07 | 0.00657667 | 0.347 | 0.675 |
| RPL18    | 9 | -0.4989687 | 1.28E-14 | 2.33E-10   | 1     | 1     |
| KDELR2   | 9 | -0.5009403 | 2.31E-09 | 4.22E-05   | 0.941 | 0.988 |
| GPC1     | 9 | -0.5042467 | 1.35E-08 | 0.00024549 | 0.198 | 0.566 |
| NUCB2    | 9 | -0.5076162 | 3.08E-07 | 0.00561983 | 0.762 | 0.892 |
| ARPC1B   | 9 | -0.5244268 | 4.81E-07 | 0.00878273 | 0.584 | 0.831 |
| RPL7     | 9 | -0.5293222 | 7.11E-11 | 1.30E-06   | 1     | 1     |
| MAP1B    | 9 | -0.5441159 | 6.39E-07 | 0.01165656 | 0.208 | 0.53  |
| ISLR     | 9 | -0.5589119 | 1.05E-06 | 0.01915214 | 0.832 | 0.867 |
| HDLBP    | 9 | -0.5622142 | 3.14E-09 | 5.73E-05   | 0.495 | 0.795 |
| IGFBP6   | 9 | -0.5827871 | 1.31E-07 | 0.00238342 | 0.842 | 0.916 |
| HINT1    | 9 | -0.5831886 | 2.34E-14 | 4.26E-10   | 0.921 | 1     |
| COL14A1  | 9 | -0.5954358 | 1.72E-11 | 3.14E-07   | 0.04  | 0.458 |
| EEF2     | 9 | -0.5988423 | 2.66E-11 | 4.85E-07   | 0.98  | 1     |
| SCD      | 9 | -0.601745  | 1.49E-07 | 0.00271434 | 0.158 | 0.494 |
| TPT1     | 9 | -0.6025637 | 5.89E-14 | 1.07E-09   | 1     | 1     |
| DAB2     | 9 | -0.607937  | 6.56E-10 | 1.20E-05   | 0.416 | 0.771 |
| SPTSSB   | 9 | -0.6115973 | 1.87E-08 | 0.00034132 | 0     | 0.277 |

|             |                |                  |              |                  |              |              |
|-------------|----------------|------------------|--------------|------------------|--------------|--------------|
| LOXL1       | 9              | -0.6266426       | 5.42E-08     | 0.00098877       | 0.149        | 0.506        |
| PTRF        | 9              | -0.6350022       | 1.08E-10     | 1.98E-06         | 0.604        | 0.88         |
| RPLP0       | 9              | -0.6379358       | 6.95E-19     | 1.27E-14         | 1            | 1            |
| SDC2        | 9              | -0.6476324       | 4.93E-14     | 9.00E-10         | 0.99         | 0.976        |
| PAX1        | 9              | -0.653647        | 1.94E-08     | 0.0003537        | 0.624        | 0.855        |
| INSIG1      | 9              | -0.6943665       | 6.49E-07     | 0.01184408       | 0.465        | 0.771        |
| MT-ND4      | 9              | -0.7161304       | 1.07E-13     | 1.96E-09         | 0.99         | 0.988        |
| PLPP1       | 9              | -0.7219302       | 2.20E-09     | 4.02E-05         | 0.634        | 0.892        |
| MT-CO2      | 9              | -0.7283685       | 2.55E-11     | 4.65E-07         | 0.99         | 0.988        |
| CLEC3A      | 9              | -0.7314228       | 2.18E-07     | 0.00397796       | 0.307        | 0.651        |
| CRIP2       | 9              | -0.7358845       | 6.71E-12     | 1.22E-07         | 0.257        | 0.687        |
| VIM         | 9              | -0.7792955       | 9.94E-07     | 0.01813202       | 1            | 1            |
| EEF1A1      | 9              | -0.7858838       | 5.93E-21     | 1.08E-16         | 1            | 1            |
| RPS11       | 9              | -0.7888295       | 4.57E-21     | 8.34E-17         | 1            | 1            |
| THY1        | 9              | -0.794025        | 5.44E-12     | 9.92E-08         | 0.871        | 0.988        |
| NEAT1       | 9              | -0.8073935       | 5.32E-08     | 0.00097068       | 0.99         | 0.976        |
| ZFP36L2     | 9              | -0.877731        | 5.16E-08     | 0.00094124       | 0.208        | 0.542        |
| EIF3H       | 9              | -0.8877646       | 2.04E-19     | 3.73E-15         | 0.851        | 0.976        |
| MT-ND1      | 9              | -0.9001992       | 2.70E-16     | 4.93E-12         | 0.713        | 0.952        |
| COL8A1      | 9              | -0.9327239       | 4.06E-09     | 7.41E-05         | 0.089        | 0.458        |
| RPS20       | 9              | -0.9509704       | 2.49E-27     | 4.55E-23         | 0.99         | 1            |
| NOV         | 9              | -0.9527967       | 1.32E-07     | 0.00240237       | 0.05         | 0.349        |
| FHL1        | 9              | -0.9675919       | 1.61E-12     | 2.93E-08         | 0.574        | 0.904        |
| MT-CO1      | 9              | -0.967745        | 3.07E-19     | 5.60E-15         | 1            | 0.976        |
| MT-CO3      | 9              | -0.9729971       | 7.49E-20     | 1.37E-15         | 0.97         | 0.976        |
| TPM1        | 9              | -1.0155965       | 3.09E-11     | 5.65E-07         | 0.752        | 0.964        |
| MT-ATP6     | 9              | -1.0252439       | 3.91E-20     | 7.13E-16         | 0.901        | 1            |
| CAPS        | 9              | -1.0911204       | 4.29E-15     | 7.82E-11         | 0.614        | 0.928        |
| MT-ND3      | 9              | -1.0997464       | 8.55E-19     | 1.56E-14         | 0.822        | 0.964        |
| MT-ND2      | 9              | -1.1146737       | 1.68E-18     | 3.06E-14         | 0.772        | 0.976        |
| MT-CYB      | 9              | -1.1305891       | 4.20E-19     | 7.66E-15         | 0.822        | 0.976        |
| ADIRF       | 9              | -1.186295        | 4.84E-15     | 8.83E-11         | 0.277        | 0.771        |
| CTGF        | 9              | -1.1898402       | 5.34E-09     | 9.74E-05         | 0.851        | 0.988        |
| MSMP        | 9              | -2.1988854       | 1.08E-07     | 0.00197842       | 0.109        | 0.446        |
| <b>gene</b> | <b>cluster</b> | <b>avg_logFC</b> | <b>p_val</b> | <b>p_val_adj</b> | <b>pct.1</b> | <b>pct.2</b> |
| SPP1        | 10             | 2.40740793       | 6.69E-14     | 1.22E-09         | 0.745        | 0.098        |
| MT2A        | 10             | 1.57550069       | 1.71E-12     | 3.12E-08         | 1            | 0.98         |
| VEGFA       | 10             | 1.52106208       | 3.01E-16     | 5.49E-12         | 0.908        | 0.373        |
| PPP3CA      | 10             | 1.51189604       | 4.78E-22     | 8.72E-18         | 1            | 0.941        |

|           |    |            |          |            |       |       |
|-----------|----|------------|----------|------------|-------|-------|
| COMP      | 10 | 1.50219179 | 1.54E-14 | 2.82E-10   | 0.969 | 0.627 |
| S100A2    | 10 | 1.49073675 | 1.27E-08 | 0.00023151 | 0.745 | 0.373 |
| CHI3L2    | 10 | 1.46295719 | 9.37E-15 | 1.71E-10   | 0.888 | 0.333 |
| PTGS2     | 10 | 1.42861184 | 7.30E-14 | 1.33E-09   | 0.714 | 0.039 |
| CCDC85B   | 10 | 1.42120544 | 5.78E-18 | 1.06E-13   | 0.99  | 0.725 |
| MT1X      | 10 | 1.39064749 | 4.44E-11 | 8.11E-07   | 1     | 0.961 |
| MT1G      | 10 | 1.34101842 | 2.31E-09 | 4.22E-05   | 0.969 | 0.863 |
| PLA2G2A   | 10 | 1.28286723 | 6.32E-08 | 0.00115348 | 0.724 | 0.275 |
| DDIT4L    | 10 | 1.25561233 | 7.90E-14 | 1.44E-09   | 0.908 | 0.353 |
| MRPS6     | 10 | 1.25357321 | 6.66E-10 | 1.22E-05   | 0.969 | 0.882 |
| CTSD      | 10 | 1.24088695 | 1.70E-08 | 0.00030993 | 0.959 | 0.961 |
| PHLDA1    | 10 | 1.15999248 | 5.59E-10 | 1.02E-05   | 0.582 | 0.059 |
| STK17A    | 10 | 1.135637   | 4.60E-11 | 8.40E-07   | 0.653 | 0.098 |
| FN1       | 10 | 1.13057094 | 1.03E-15 | 1.88E-11   | 1     | 1     |
| PRG4      | 10 | 1.12948514 | 2.79E-09 | 5.08E-05   | 0.571 | 0.078 |
| IGFBP3    | 10 | 1.10996237 | 1.59E-08 | 0.0002896  | 0.582 | 0.118 |
| BMP2      | 10 | 1.10666602 | 1.29E-10 | 2.35E-06   | 0.582 | 0.02  |
| UPP1      | 10 | 1.09755614 | 1.31E-12 | 2.38E-08   | 0.735 | 0.137 |
| ERO1A     | 10 | 1.07437535 | 5.08E-14 | 9.28E-10   | 0.857 | 0.333 |
| FOSL1     | 10 | 1.0689377  | 6.55E-09 | 0.00011943 | 0.5   | 0.02  |
| PTP4A1    | 10 | 1.0501622  | 1.53E-13 | 2.79E-09   | 0.806 | 0.196 |
| WTAP      | 10 | 1.04466522 | 7.62E-12 | 1.39E-07   | 0.969 | 0.706 |
| SERPINE2  | 10 | 1.03354197 | 8.20E-13 | 1.50E-08   | 1     | 0.98  |
| IGFBP5    | 10 | 1.01284824 | 1.24E-08 | 0.00022712 | 0.551 | 0.078 |
| TNFRSF12A | 10 | 1.00589301 | 8.91E-11 | 1.63E-06   | 0.663 | 0.098 |
| ARF6      | 10 | 0.97740503 | 2.49E-12 | 4.55E-08   | 0.837 | 0.294 |
| PPP1CB    | 10 | 0.96943254 | 6.20E-17 | 1.13E-12   | 1     | 0.922 |
| ADM       | 10 | 0.92685939 | 4.34E-08 | 0.00079175 | 0.888 | 0.588 |
| TGFBI     | 10 | 0.92683403 | 2.25E-10 | 4.11E-06   | 0.694 | 0.196 |
| CTNNB1    | 10 | 0.88867588 | 1.84E-12 | 3.36E-08   | 0.98  | 0.804 |
| ARRDC3    | 10 | 0.84387836 | 2.59E-06 | 0.04726583 | 0.684 | 0.333 |
| ISG20     | 10 | 0.83493521 | 5.59E-09 | 0.00010207 | 0.653 | 0.176 |
| ENO2      | 10 | 0.82194801 | 1.01E-10 | 1.84E-06   | 0.786 | 0.294 |
| PPFIBP1   | 10 | 0.82075057 | 2.12E-09 | 3.87E-05   | 0.724 | 0.255 |
| BHLHE40   | 10 | 0.82075057 | 4.82E-07 | 0.00878653 | 0.663 | 0.333 |
| HILPDA    | 10 | 0.77089284 | 4.23E-07 | 0.00772208 | 0.724 | 0.314 |
| DDIT3     | 10 | 0.76996649 | 1.95E-07 | 0.00355382 | 0.735 | 0.373 |
| NDRG1     | 10 | 0.7512799  | 2.64E-08 | 0.00048179 | 0.765 | 0.412 |
| AK2       | 10 | 0.74408159 | 1.82E-08 | 0.00033135 | 0.806 | 0.529 |

|          |    |            |          |            |       |       |
|----------|----|------------|----------|------------|-------|-------|
| SLC2A1   | 10 | 0.73731053 | 3.11E-07 | 0.00568259 | 0.571 | 0.176 |
| RGS2     | 10 | 0.71209911 | 7.95E-07 | 0.01449791 | 0.653 | 0.235 |
| SLC3A2   | 10 | 0.70227528 | 2.01E-07 | 0.00366212 | 0.663 | 0.235 |
| WDR45B   | 10 | 0.70196959 | 7.58E-10 | 1.38E-05   | 0.633 | 0.118 |
| SLC25A37 | 10 | 0.70119016 | 1.30E-10 | 2.38E-06   | 0.98  | 0.804 |
| VAPA     | 10 | 0.68185922 | 1.40E-10 | 2.55E-06   | 0.969 | 0.863 |
| SPRY2    | 10 | 0.68088409 | 2.51E-08 | 0.0004582  | 0.52  | 0.059 |
| BAALC    | 10 | 0.66963911 | 6.63E-08 | 0.00120958 | 0.653 | 0.196 |
| C11orf96 | 10 | 0.66861399 | 2.57E-06 | 0.04694879 | 0.388 | 0.02  |
| SOD2     | 10 | 0.66101652 | 3.12E-08 | 0.00056959 | 0.99  | 0.765 |
| PGK1     | 10 | 0.66041723 | 8.38E-09 | 0.00015288 | 0.98  | 0.922 |
| ARPP19   | 10 | 0.65994911 | 3.64E-10 | 6.64E-06   | 0.857 | 0.412 |
| HLA-DRB1 | 10 | 0.65780308 | 1.83E-06 | 0.03337777 | 0.571 | 0.216 |
| CA9      | 10 | 0.63630269 | 1.90E-06 | 0.03473905 | 0.592 | 0.235 |
| GAPDH    | 10 | 0.62747671 | 5.23E-07 | 0.00954815 | 1     | 1     |
| FAM162A  | 10 | 0.62078146 | 1.63E-08 | 0.00029793 | 1     | 0.824 |
| SDC4     | 10 | 0.61931737 | 3.36E-07 | 0.0061234  | 0.755 | 0.333 |
| TREM1    | 10 | 0.61903921 | 1.79E-09 | 3.27E-05   | 0.5   | 0     |
| COX17    | 10 | 0.61352955 | 9.87E-08 | 0.00180116 | 0.837 | 0.588 |
| ZNF385D  | 10 | 0.60465047 | 1.56E-06 | 0.02845995 | 0.724 | 0.333 |
| RABGGTB  | 10 | 0.59817708 | 1.36E-07 | 0.00247409 | 0.847 | 0.51  |
| CTHRC1   | 10 | 0.59468284 | 9.29E-07 | 0.01695341 | 0.5   | 0.098 |
| CD44     | 10 | 0.59019203 | 1.38E-07 | 0.00251764 | 0.918 | 0.647 |
| SGIP1    | 10 | 0.58857129 | 9.16E-07 | 0.01671925 | 0.398 | 0.02  |
| RNMT     | 10 | 0.55395109 | 8.93E-07 | 0.01629383 | 0.602 | 0.196 |
| BTG1     | 10 | 0.54402212 | 1.19E-07 | 0.00216993 | 1     | 0.922 |
| MRPL14   | 10 | 0.54376379 | 4.96E-07 | 0.00904305 | 0.694 | 0.294 |
| PTGES3   | 10 | 0.54027824 | 5.81E-09 | 0.00010598 | 0.98  | 0.941 |
| FAM210A  | 10 | 0.53784376 | 6.39E-07 | 0.01166355 | 0.602 | 0.196 |
| HMGA2    | 10 | 0.53302633 | 1.46E-07 | 0.0026612  | 0.408 | 0     |
| ATP6V1G1 | 10 | 0.52339376 | 1.62E-07 | 0.00295133 | 1     | 0.961 |
| NRP2     | 10 | 0.52000349 | 1.49E-06 | 0.02718457 | 0.469 | 0.078 |
| PLA2G4A  | 10 | 0.49199046 | 2.03E-06 | 0.03702537 | 0.48  | 0.098 |
| EVI2A    | 10 | 0.48855403 | 1.93E-07 | 0.00351679 | 0.459 | 0.039 |
| EPS8     | 10 | 0.48425647 | 1.37E-06 | 0.02501043 | 0.551 | 0.157 |
| RTN4     | 10 | 0.47445798 | 2.23E-08 | 0.00040782 | 0.918 | 0.686 |
| TRMT112  | 10 | 0.47155016 | 9.40E-07 | 0.01715092 | 0.949 | 0.941 |
| CLDND1   | 10 | 0.46577571 | 5.93E-07 | 0.01081586 | 0.653 | 0.235 |
| NBPF14   | 10 | 0.44547044 | 1.77E-06 | 0.03222016 | 0.439 | 0.059 |



|             |    |            |          |            |       |       |
|-------------|----|------------|----------|------------|-------|-------|
| A4GALT      | 10 | 0.41897883 | 2.26E-07 | 0.00411954 | 0.398 | 0     |
| EIF4A2      | 10 | 0.41156889 | 8.71E-07 | 0.01590106 | 1     | 1     |
| MIF         | 10 | 0.38619383 | 8.37E-07 | 0.01527611 | 1     | 1     |
| RPL5        | 10 | -0.2599368 | 1.18E-06 | 0.02159454 | 1     | 1     |
| RPS19       | 10 | -0.2619095 | 3.53E-08 | 0.00064383 | 1     | 1     |
| RPS15A      | 10 | -0.2638761 | 3.52E-08 | 0.00064147 | 1     | 1     |
| RPS14       | 10 | -0.2683722 | 7.44E-09 | 0.00013575 | 1     | 1     |
| RPL26       | 10 | -0.2815783 | 1.42E-08 | 0.00025943 | 1     | 1     |
| RPL32       | 10 | -0.2834958 | 3.73E-11 | 6.81E-07   | 1     | 1     |
| NACA        | 10 | -0.2896637 | 8.37E-07 | 0.01528149 | 1     | 1     |
| ODF2L       | 10 | -0.3007012 | 8.23E-07 | 0.01501728 | 0.031 | 0.314 |
| RPS28       | 10 | -0.3021819 | 8.27E-13 | 1.51E-08   | 1     | 1     |
| GNB2L1      | 10 | -0.3025517 | 1.68E-07 | 0.00306715 | 1     | 1     |
| COX7C       | 10 | -0.3030344 | 1.32E-06 | 0.024039   | 1     | 1     |
| RPL6        | 10 | -0.3041889 | 1.17E-07 | 0.00214048 | 1     | 1     |
| AFF3        | 10 | -0.3146874 | 2.54E-07 | 0.00464052 | 0.031 | 0.333 |
| RPL24       | 10 | -0.3160712 | 4.90E-10 | 8.95E-06   | 1     | 1     |
| RPL15       | 10 | -0.3186254 | 1.83E-13 | 3.35E-09   | 1     | 1     |
| TXNIP       | 10 | -0.3262391 | 1.37E-07 | 0.00249687 | 0.041 | 0.373 |
| RPS21       | 10 | -0.3264576 | 8.24E-09 | 0.00015033 | 1     | 1     |
| RPS3        | 10 | -0.3267902 | 1.83E-11 | 3.34E-07   | 1     | 1     |
| RPL7A       | 10 | -0.3268838 | 7.24E-10 | 1.32E-05   | 1     | 1     |
| NBEAL1      | 10 | -0.3316855 | 1.65E-06 | 0.0300744  | 0.99  | 1     |
| SNRPA       | 10 | -0.3370218 | 4.13E-07 | 0.0075404  | 0.082 | 0.431 |
| RPL11       | 10 | -0.3386961 | 3.87E-12 | 7.06E-08   | 1     | 1     |
| RPL27A      | 10 | -0.3394624 | 3.78E-11 | 6.90E-07   | 1     | 1     |
| RPL28       | 10 | -0.3408602 | 3.33E-12 | 6.08E-08   | 1     | 1     |
| CLDN11      | 10 | -0.3420864 | 2.38E-06 | 0.04339096 | 0.031 | 0.294 |
| RPS25       | 10 | -0.3517911 | 3.31E-13 | 6.03E-09   | 1     | 1     |
| ATP5G2      | 10 | -0.3528427 | 1.05E-06 | 0.01908062 | 1     | 1     |
| GSTA4       | 10 | -0.353899  | 9.68E-07 | 0.01766053 | 0.153 | 0.529 |
| RPS24       | 10 | -0.3544813 | 1.01E-08 | 0.00018391 | 1     | 1     |
| RPS9        | 10 | -0.3634987 | 1.02E-11 | 1.87E-07   | 1     | 1     |
| KHDRBS3     | 10 | -0.3654598 | 4.83E-07 | 0.00880902 | 0.01  | 0.275 |
| RPS6        | 10 | -0.3654598 | 2.90E-14 | 5.29E-10   | 1     | 1     |
| RPS2        | 10 | -0.368656  | 3.51E-11 | 6.40E-07   | 1     | 1     |
| SERTAD4-AS1 | 10 | -0.3687547 | 7.36E-08 | 0.00134388 | 0.031 | 0.353 |
| RPL35       | 10 | -0.3751437 | 2.09E-12 | 3.81E-08   | 1     | 1     |
| RPL39       | 10 | -0.37745   | 8.70E-14 | 1.59E-09   | 1     | 1     |

|         |    |            |          |            |       |       |
|---------|----|------------|----------|------------|-------|-------|
| RPL12   | 10 | -0.3776    | 3.27E-13 | 5.96E-09   | 1     | 1     |
| COMMD6  | 10 | -0.379446  | 1.25E-09 | 2.28E-05   | 0.99  | 1     |
| TOMM7   | 10 | -0.3797404 | 9.29E-10 | 1.70E-05   | 1     | 1     |
| YBX1    | 10 | -0.3815592 | 1.62E-07 | 0.00295607 | 0.98  | 1     |
| RPL29   | 10 | -0.3845431 | 2.21E-12 | 4.02E-08   | 1     | 1     |
| CCDC8   | 10 | -0.3907776 | 9.49E-07 | 0.01732509 | 0.061 | 0.373 |
| PLP2    | 10 | -0.3944916 | 2.42E-06 | 0.0440908  | 0.582 | 0.941 |
| RPS27A  | 10 | -0.3982973 | 5.57E-14 | 1.02E-09   | 1     | 1     |
| RPL22   | 10 | -0.4010718 | 2.62E-11 | 4.78E-07   | 1     | 1     |
| RPS12   | 10 | -0.4011555 | 3.27E-13 | 5.96E-09   | 1     | 1     |
| RPL37A  | 10 | -0.4016999 | 1.33E-13 | 2.43E-09   | 1     | 1     |
| ATP5L   | 10 | -0.4029173 | 1.81E-06 | 0.03303139 | 0.959 | 1     |
| RPS5    | 10 | -0.4042322 | 5.67E-13 | 1.03E-08   | 1     | 1     |
| FUS     | 10 | -0.4076414 | 2.40E-06 | 0.04372015 | 0.388 | 0.745 |
| GLTSCR2 | 10 | -0.4103836 | 9.37E-09 | 0.00017106 | 0.959 | 0.98  |
| CXXC5   | 10 | -0.4104112 | 2.29E-07 | 0.0041711  | 0.153 | 0.549 |
| EID1    | 10 | -0.4142067 | 1.61E-07 | 0.002939   | 0.918 | 1     |
| RPL3    | 10 | -0.4163831 | 2.33E-13 | 4.26E-09   | 1     | 1     |
| RPL27   | 10 | -0.4205452 | 3.65E-11 | 6.66E-07   | 1     | 1     |
| RPL7    | 10 | -0.4221309 | 4.12E-10 | 7.52E-06   | 1     | 1     |
| RPS13   | 10 | -0.4227373 | 1.86E-13 | 3.40E-09   | 1     | 1     |
| RPS27   | 10 | -0.4240059 | 1.40E-14 | 2.55E-10   | 1     | 1     |
| CD99    | 10 | -0.4282607 | 1.66E-06 | 0.03035859 | 0.929 | 1     |
| RPL18A  | 10 | -0.4290153 | 2.42E-15 | 4.42E-11   | 1     | 1     |
| RPL13   | 10 | -0.4298348 | 3.50E-17 | 6.39E-13   | 1     | 1     |
| LRRC2   | 10 | -0.4299983 | 2.12E-07 | 0.0038605  | 0.122 | 0.49  |
| SDF4    | 10 | -0.4299983 | 2.33E-06 | 0.04254408 | 0.653 | 0.843 |
| TUBB    | 10 | -0.4319049 | 1.43E-06 | 0.02615487 | 0.684 | 0.961 |
| SSR4    | 10 | -0.4393296 | 1.88E-06 | 0.0343382  | 0.898 | 0.98  |
| SLC44A1 | 10 | -0.4442407 | 3.04E-07 | 0.00554423 | 0.214 | 0.608 |
| RPS7    | 10 | -0.4462395 | 9.71E-13 | 1.77E-08   | 1     | 1     |
| RPL19   | 10 | -0.4473392 | 3.02E-18 | 5.51E-14   | 1     | 1     |
| HINT1   | 10 | -0.4479597 | 5.15E-07 | 0.0093923  | 0.959 | 0.98  |
| CP      | 10 | -0.4542277 | 1.84E-06 | 0.03352613 | 0.602 | 0.902 |
| RPLP1   | 10 | -0.4609078 | 4.92E-16 | 8.98E-12   | 1     | 1     |
| RPA3    | 10 | -0.462452  | 1.58E-07 | 0.00288106 | 0.378 | 0.765 |
| RPL21   | 10 | -0.4627842 | 4.49E-18 | 8.20E-14   | 1     | 1     |
| RPL8    | 10 | -0.4659175 | 1.64E-16 | 2.99E-12   | 1     | 1     |
| NGFRAP1 | 10 | -0.4679994 | 1.87E-07 | 0.00340319 | 0.796 | 0.961 |

|          |    |            |          |            |       |       |
|----------|----|------------|----------|------------|-------|-------|
| RPS18    | 10 | -0.4725307 | 7.54E-18 | 1.38E-13   | 1     | 1     |
| PRKCSH   | 10 | -0.4772512 | 1.31E-07 | 0.00239535 | 0.204 | 0.608 |
| UBA52    | 10 | -0.478048  | 9.81E-16 | 1.79E-11   | 1     | 1     |
| RPL35A   | 10 | -0.4789987 | 4.12E-16 | 7.52E-12   | 1     | 1     |
| RPS23    | 10 | -0.4792653 | 2.76E-15 | 5.03E-11   | 1     | 1     |
| RPL31    | 10 | -0.4849972 | 7.47E-14 | 1.36E-09   | 1     | 1     |
| RPL34    | 10 | -0.4869929 | 1.98E-16 | 3.61E-12   | 1     | 1     |
| HIST1H1C | 10 | -0.4882672 | 1.95E-06 | 0.0355554  | 0.173 | 0.529 |
| EEF1B2   | 10 | -0.4920098 | 7.21E-08 | 0.00131608 | 0.969 | 1     |
| PPIA     | 10 | -0.4955129 | 1.02E-07 | 0.0018687  | 0.827 | 0.941 |
| RPL37    | 10 | -0.4980077 | 2.29E-14 | 4.18E-10   | 1     | 1     |
| PRDX6    | 10 | -0.4989912 | 4.66E-08 | 0.00085016 | 0.765 | 0.941 |
| RPL10    | 10 | -0.5007233 | 9.98E-19 | 1.82E-14   | 1     | 1     |
| PPIC     | 10 | -0.5014573 | 3.08E-07 | 0.00561942 | 0.296 | 0.667 |
| NAP1L1   | 10 | -0.5024816 | 1.29E-09 | 2.36E-05   | 0.98  | 1     |
| RPL9     | 10 | -0.5065865 | 1.76E-18 | 3.20E-14   | 1     | 1     |
| RPS3A    | 10 | -0.5079692 | 5.13E-16 | 9.35E-12   | 1     | 1     |
| PCBP2    | 10 | -0.5080496 | 4.39E-08 | 0.00080128 | 0.908 | 1     |
| RPL14    | 10 | -0.5097124 | 1.04E-16 | 1.89E-12   | 1     | 1     |
| PLPP1    | 10 | -0.5143054 | 8.62E-08 | 0.00157214 | 0.102 | 0.471 |
| RPL13A   | 10 | -0.5153472 | 5.93E-17 | 1.08E-12   | 1     | 1     |
| RPSA     | 10 | -0.5156343 | 2.15E-13 | 3.92E-09   | 1     | 1     |
| HNRNPA1  | 10 | -0.5157118 | 1.35E-08 | 0.00024646 | 1     | 1     |
| RPL30    | 10 | -0.5173315 | 6.58E-16 | 1.20E-11   | 1     | 1     |
| MYL6     | 10 | -0.5181856 | 1.17E-07 | 0.00212724 | 0.867 | 0.98  |
| EIF3K    | 10 | -0.5196105 | 4.17E-10 | 7.61E-06   | 0.704 | 0.961 |
| FMOD     | 10 | -0.520213  | 1.25E-07 | 0.00228101 | 0.827 | 0.98  |
| OXA1L    | 10 | -0.5222363 | 9.83E-07 | 0.01794162 | 0.449 | 0.784 |
| COL6A2   | 10 | -0.5276041 | 1.37E-07 | 0.00249756 | 0.52  | 0.863 |
| HDLBP    | 10 | -0.5362205 | 1.11E-06 | 0.02024505 | 0.367 | 0.706 |
| HIST1H4C | 10 | -0.5395447 | 2.73E-07 | 0.00497275 | 0.337 | 0.745 |
| EIF2A    | 10 | -0.540155  | 5.37E-08 | 0.0009804  | 0.673 | 0.882 |
| PTRF     | 10 | -0.5477813 | 1.33E-06 | 0.02424996 | 0.347 | 0.686 |
| PABPC1   | 10 | -0.5493022 | 1.22E-07 | 0.00223499 | 0.878 | 1     |
| EIF3D    | 10 | -0.5510124 | 1.29E-08 | 0.00023577 | 0.663 | 0.902 |
| RPL23    | 10 | -0.5526439 | 3.23E-15 | 5.90E-11   | 1     | 1     |
| RABAC1   | 10 | -0.5587322 | 2.64E-08 | 0.00048129 | 0.643 | 0.922 |
| RPS29    | 10 | -0.5609714 | 7.89E-18 | 1.44E-13   | 1     | 1     |
| MT-ND4   | 10 | -0.5664551 | 2.34E-07 | 0.00426494 | 0.969 | 0.98  |

|          |    |            |          |            |       |       |
|----------|----|------------|----------|------------|-------|-------|
| NDUFA11  | 10 | -0.5799384 | 2.57E-09 | 4.68E-05   | 0.765 | 0.961 |
| RHOBTB3  | 10 | -0.5869599 | 7.00E-07 | 0.01277889 | 0.51  | 0.824 |
| GPX3     | 10 | -0.5904909 | 1.10E-08 | 0.00020053 | 0.918 | 0.98  |
| NNMT     | 10 | -0.5906215 | 5.18E-08 | 0.00094577 | 0.857 | 0.961 |
| CITED2   | 10 | -0.5920542 | 2.68E-09 | 4.89E-05   | 0.296 | 0.745 |
| FHL1     | 10 | -0.5959834 | 1.04E-09 | 1.91E-05   | 0.255 | 0.725 |
| VIM      | 10 | -0.5990073 | 2.38E-10 | 4.35E-06   | 1     | 1     |
| CD9      | 10 | -0.6002994 | 1.53E-06 | 0.02788601 | 0.286 | 0.627 |
| NFIA     | 10 | -0.6035449 | 4.68E-08 | 0.00085443 | 0.214 | 0.608 |
| GAS6     | 10 | -0.6126505 | 1.48E-08 | 0.00026996 | 0.204 | 0.627 |
| ATRNL1   | 10 | -0.6154015 | 8.39E-11 | 1.53E-06   | 0.092 | 0.569 |
| TUBB2B   | 10 | -0.6156843 | 2.63E-06 | 0.04790583 | 0.306 | 0.608 |
| RPLP2    | 10 | -0.620919  | 1.90E-19 | 3.47E-15   | 1     | 1     |
| RPS17    | 10 | -0.6232695 | 2.11E-16 | 3.85E-12   | 1     | 1     |
| EIF3L    | 10 | -0.6308124 | 7.48E-12 | 1.36E-07   | 0.816 | 0.961 |
| RPL23A   | 10 | -0.6321385 | 2.87E-20 | 5.24E-16   | 1     | 1     |
| ISLR     | 10 | -0.6322352 | 2.70E-08 | 0.00049319 | 0.327 | 0.725 |
| SSPN     | 10 | -0.6363347 | 8.31E-08 | 0.00151712 | 0.204 | 0.588 |
| NPC2     | 10 | -0.6409217 | 2.97E-13 | 5.42E-09   | 0.969 | 1     |
| UQCRB    | 10 | -0.6421164 | 7.77E-12 | 1.42E-07   | 0.98  | 1     |
| SSR3     | 10 | -0.6428147 | 2.04E-08 | 0.00037165 | 0.776 | 0.961 |
| CCDC102B | 10 | -0.6433857 | 2.11E-13 | 3.85E-09   | 0.041 | 0.569 |
| FTH1     | 10 | -0.6494654 | 7.50E-11 | 1.37E-06   | 1     | 1     |
| SEC11A   | 10 | -0.6531418 | 1.45E-09 | 2.64E-05   | 0.765 | 0.961 |
| TPT1     | 10 | -0.6581005 | 1.34E-17 | 2.44E-13   | 1     | 1     |
| PRUNE2   | 10 | -0.6612391 | 2.42E-10 | 4.41E-06   | 0.224 | 0.706 |
| P4HB     | 10 | -0.668646  | 3.13E-11 | 5.71E-07   | 0.714 | 1     |
| CCNI     | 10 | -0.6689733 | 1.77E-16 | 3.22E-12   | 0.98  | 1     |
| RPS16    | 10 | -0.6723048 | 2.29E-18 | 4.18E-14   | 1     | 1     |
| H3F3A    | 10 | -0.6945986 | 6.33E-15 | 1.16E-10   | 0.918 | 1     |
| EIF4B    | 10 | -0.6974421 | 8.63E-12 | 1.57E-07   | 0.786 | 0.98  |
| RPL4     | 10 | -0.7115139 | 4.09E-17 | 7.46E-13   | 0.99  | 1     |
| EEF1A1   | 10 | -0.7176432 | 5.33E-19 | 9.73E-15   | 1     | 1     |
| RPL18    | 10 | -0.7208646 | 7.01E-20 | 1.28E-15   | 1     | 1     |
| XAGE2    | 10 | -0.7221347 | 5.41E-09 | 9.88E-05   | 0     | 0.314 |
| SERPINA5 | 10 | -0.7254625 | 6.45E-10 | 1.18E-05   | 0.418 | 0.824 |
| THY1     | 10 | -0.7260486 | 1.53E-12 | 2.79E-08   | 0.143 | 0.706 |
| SLC14A1  | 10 | -0.744809  | 6.62E-13 | 1.21E-08   | 0.194 | 0.765 |
| RPLP0    | 10 | -0.7633075 | 6.74E-20 | 1.23E-15   | 1     | 1     |

|          |         |            |          |            |       |       |
|----------|---------|------------|----------|------------|-------|-------|
| RPL10A   | 10      | -0.7705208 | 7.79E-19 | 1.42E-14   | 1     | 1     |
| CYR61    | 10      | -0.7897174 | 5.01E-09 | 9.14E-05   | 0.112 | 0.549 |
| YBX3     | 10      | -0.7946414 | 8.08E-13 | 1.47E-08   | 0.694 | 1     |
| APOD     | 10      | -0.7956419 | 8.87E-12 | 1.62E-07   | 0.092 | 0.608 |
| LECT1    | 10      | -0.80522   | 5.16E-08 | 0.00094076 | 0.816 | 0.961 |
| MT-ND1   | 10      | -0.8177229 | 8.85E-11 | 1.61E-06   | 0.5   | 0.902 |
| TCF4     | 10      | -0.8208062 | 5.63E-12 | 1.03E-07   | 0.245 | 0.745 |
| B2M      | 10      | -0.8218098 | 5.55E-14 | 1.01E-09   | 1     | 1     |
| C2orf82  | 10      | -0.824383  | 4.09E-10 | 7.46E-06   | 0.949 | 1     |
| MT-CO2   | 10      | -0.8322615 | 1.15E-09 | 2.09E-05   | 0.959 | 0.961 |
| RPS8     | 10      | -0.8342398 | 1.68E-21 | 3.06E-17   | 1     | 1     |
| SPARC    | 10      | -0.8491695 | 3.51E-07 | 0.00640866 | 0.418 | 0.765 |
| EEF2     | 10      | -0.858405  | 1.12E-15 | 2.05E-11   | 0.99  | 1     |
| ACTG1    | 10      | -0.8614977 | 7.70E-13 | 1.40E-08   | 0.898 | 1     |
| MT-CO3   | 10      | -0.8968608 | 2.74E-10 | 5.00E-06   | 0.857 | 0.98  |
| PAX1     | 10      | -0.9044563 | 3.27E-12 | 5.96E-08   | 0.418 | 0.902 |
| NEAT1    | 10      | -0.9121101 | 2.24E-13 | 4.09E-09   | 0.969 | 1     |
| CRISPLD1 | 10      | -0.917621  | 7.42E-10 | 1.35E-05   | 0.082 | 0.51  |
| MT-ND2   | 10      | -0.9337137 | 1.39E-09 | 2.54E-05   | 0.551 | 0.882 |
| RPS20    | 10      | -0.9450218 | 5.64E-22 | 1.03E-17   | 1     | 1     |
| CRTAP    | 10      | -0.9479414 | 2.41E-18 | 4.39E-14   | 0.541 | 0.961 |
| MT-CO1   | 10      | -0.9523707 | 4.13E-11 | 7.53E-07   | 0.939 | 0.961 |
| MT-ATP6  | 10      | -0.9657403 | 1.96E-10 | 3.57E-06   | 0.735 | 0.961 |
| EIF3H    | 10      | -0.9701111 | 9.37E-20 | 1.71E-15   | 0.949 | 1     |
| ZFP36L2  | 10      | -0.9753451 | 1.12E-10 | 2.04E-06   | 0.194 | 0.667 |
| COL2A1   | 10      | -1.0649562 | 1.62E-08 | 0.00029538 | 0.531 | 0.902 |
| RPS11    | 10      | -1.0659063 | 8.15E-22 | 1.49E-17   | 1     | 1     |
| SLC40A1  | 10      | -1.070877  | 8.64E-17 | 1.58E-12   | 0.071 | 0.706 |
| MT-CYB   | 10      | -1.100156  | 7.87E-11 | 1.44E-06   | 0.561 | 0.902 |
| ADIRF    | 10      | -1.2346491 | 1.16E-15 | 2.11E-11   | 0.306 | 0.882 |
| MT-ND3   | 10      | -1.2749124 | 4.35E-14 | 7.94E-10   | 0.469 | 0.922 |
| CLEC3A   | 10      | -1.2761795 | 2.77E-16 | 5.05E-12   | 0.306 | 0.941 |
| CAPS     | 10      | -1.3629759 | 1.88E-16 | 3.43E-12   | 0.51  | 0.941 |
| SPTSSB   | 10      | -1.4516495 | 2.43E-18 | 4.43E-14   | 0.01  | 0.647 |
| FRZB     | 10      | -1.6412971 | 4.86E-13 | 8.88E-09   | 0.306 | 0.843 |
| OGN      | 10      | -1.6656193 | 2.85E-18 | 5.21E-14   | 0.878 | 1     |
| SPP1     | 11      | 2.36128865 | 8.47E-13 | 1.55E-08   | 0.671 | 0.061 |
| gene     | cluster | avg_logFC  | p_val    | p_val_adj  | pct.1 | pct.2 |
| COMP     | 11      | 1.38278093 | 1.36E-09 | 2.48E-05   | 0.857 | 0.5   |

|          |    |            |          |            |       |       |
|----------|----|------------|----------|------------|-------|-------|
| FN1      | 11 | 1.29006633 | 4.55E-07 | 0.00830923 | 0.971 | 1     |
| MGST1    | 11 | 1.16618571 | 8.50E-12 | 1.55E-07   | 0.8   | 0.242 |
| PLA2G2A  | 11 | 1.15916384 | 6.15E-07 | 0.01122893 | 0.543 | 0.136 |
| DDIT4L   | 11 | 1.04780396 | 2.67E-08 | 0.00048722 | 0.743 | 0.318 |
| TGFBI    | 11 | 1.02107966 | 3.75E-09 | 6.84E-05   | 0.529 | 0.076 |
| SDCBP    | 11 | 0.99852883 | 2.34E-08 | 0.00042685 | 0.829 | 0.53  |
| PRG4     | 11 | 0.98950995 | 1.62E-07 | 0.00295218 | 0.4   | 0.03  |
| VEGFA    | 11 | 0.98771543 | 1.57E-07 | 0.00286347 | 0.643 | 0.303 |
| CHI3L2   | 11 | 0.82947638 | 6.28E-08 | 0.00114655 | 0.743 | 0.318 |
| DNAJB9   | 11 | 0.81101025 | 1.83E-06 | 0.03346588 | 0.943 | 0.727 |
| NT5C3A   | 11 | 0.80615694 | 6.82E-07 | 0.01245336 | 0.571 | 0.197 |
| ARF4     | 11 | 0.77754816 | 6.21E-07 | 0.01133921 | 0.943 | 0.773 |
| SLC3A2   | 11 | 0.76457188 | 2.20E-07 | 0.00400579 | 0.943 | 0.742 |
| PTGS2    | 11 | 0.7586044  | 3.48E-07 | 0.00635578 | 0.386 | 0.03  |
| CD55     | 11 | 0.74278732 | 7.65E-10 | 1.40E-05   | 0.771 | 0.379 |
| ARF6     | 11 | 0.70903023 | 4.77E-09 | 8.71E-05   | 0.829 | 0.379 |
| IFRD1    | 11 | 0.65072741 | 7.84E-10 | 1.43E-05   | 0.914 | 0.576 |
| SPHK1    | 11 | 0.64849132 | 1.14E-09 | 2.08E-05   | 0.529 | 0.045 |
| DDIT3    | 11 | 0.63021111 | 1.48E-06 | 0.0270117  | 0.929 | 0.758 |
| STK17A   | 11 | 0.62826437 | 1.27E-10 | 2.31E-06   | 0.714 | 0.182 |
| ATP6V0B  | 11 | 0.60445372 | 2.02E-07 | 0.00369265 | 0.957 | 0.667 |
| VAPA     | 11 | 0.60040513 | 1.55E-10 | 2.83E-06   | 1     | 0.864 |
| EMP3     | 11 | 0.59773439 | 1.26E-07 | 0.00229181 | 0.929 | 0.758 |
| PID1     | 11 | 0.511174   | 2.56E-06 | 0.04670102 | 0.557 | 0.182 |
| SMIM3    | 11 | 0.43759639 | 2.10E-06 | 0.03829082 | 0.4   | 0.061 |
| KIAA1033 | 11 | 0.43206981 | 3.89E-07 | 0.00710099 | 0.457 | 0.076 |
| YBX1     | 11 | -0.3003026 | 2.23E-06 | 0.04070019 | 1     | 1     |
| RPL35    | 11 | -0.312594  | 1.30E-07 | 0.00236658 | 1     | 1     |
| RPL15    | 11 | -0.3253437 | 1.08E-06 | 0.01971576 | 1     | 1     |
| RPS7     | 11 | -0.3310814 | 2.42E-08 | 0.00044102 | 1     | 1     |
| RPL22    | 11 | -0.3370612 | 3.32E-07 | 0.00605026 | 1     | 1     |
| RPL21    | 11 | -0.3491214 | 3.84E-07 | 0.00700938 | 1     | 1     |
| RPL13A   | 11 | -0.3617253 | 7.29E-08 | 0.00133022 | 1     | 1     |
| RPL13    | 11 | -0.366451  | 6.79E-07 | 0.0123921  | 1     | 1     |
| RPL27    | 11 | -0.3727636 | 1.23E-07 | 0.00224549 | 1     | 1     |
| RPS10    | 11 | -0.3771028 | 1.86E-07 | 0.00338505 | 1     | 1     |
| CCDC102B | 11 | -0.3811281 | 7.77E-07 | 0.01416984 | 0.014 | 0.333 |
| RPS2     | 11 | -0.3918505 | 8.65E-08 | 0.00157921 | 1     | 1     |
| RPL18A   | 11 | -0.3963486 | 3.76E-09 | 6.86E-05   | 1     | 1     |

|             |    |            |          |            |       |       |
|-------------|----|------------|----------|------------|-------|-------|
| RPS6        | 11 | -0.4015937 | 3.54E-09 | 6.47E-05   | 1     | 1     |
| RPS18       | 11 | -0.4017462 | 6.13E-07 | 0.01117959 | 1     | 1     |
| RPL37A      | 11 | -0.4066084 | 2.62E-10 | 4.79E-06   | 1     | 1     |
| RPL31       | 11 | -0.4106693 | 6.54E-07 | 0.01193814 | 1     | 1     |
| RPS27A      | 11 | -0.4118398 | 5.98E-09 | 0.00010918 | 1     | 1     |
| BRK1        | 11 | -0.4155154 | 8.13E-07 | 0.01484205 | 0.7   | 0.955 |
| RPL18       | 11 | -0.4229578 | 2.09E-09 | 3.82E-05   | 1     | 1     |
| RPS23       | 11 | -0.4252295 | 1.09E-07 | 0.00199312 | 1     | 1     |
| RPL19       | 11 | -0.4337376 | 2.30E-11 | 4.19E-07   | 1     | 1     |
| RPS19       | 11 | -0.4356126 | 4.92E-10 | 8.98E-06   | 1     | 1     |
| SERTAD4-AS1 | 11 | -0.4361347 | 3.01E-07 | 0.00548921 | 0.029 | 0.379 |
| RPLP1       | 11 | -0.4400499 | 1.12E-11 | 2.04E-07   | 1     | 1     |
| RPS12       | 11 | -0.4477579 | 4.49E-08 | 0.0008195  | 1     | 1     |
| EID1        | 11 | -0.4486803 | 1.95E-08 | 0.00035672 | 0.929 | 1     |
| FTH1        | 11 | -0.4734049 | 2.53E-07 | 0.00461034 | 1     | 1     |
| RPL29       | 11 | -0.4773676 | 8.10E-10 | 1.48E-05   | 1     | 1     |
| RPL37       | 11 | -0.4862501 | 4.20E-12 | 7.67E-08   | 1     | 1     |
| RPS29       | 11 | -0.4972782 | 4.72E-14 | 8.61E-10   | 1     | 1     |
| ZBTB20      | 11 | -0.4998123 | 2.18E-06 | 0.03985438 | 0.171 | 0.53  |
| UQCRB       | 11 | -0.5002253 | 2.56E-08 | 0.00046734 | 0.971 | 1     |
| NPC2        | 11 | -0.5025268 | 2.39E-07 | 0.00436065 | 0.957 | 0.97  |
| RPL30       | 11 | -0.5048047 | 2.07E-13 | 3.77E-09   | 1     | 1     |
| RPS13       | 11 | -0.5080748 | 1.05E-11 | 1.92E-07   | 1     | 1     |
| TOMM7       | 11 | -0.5089099 | 4.16E-10 | 7.59E-06   | 0.986 | 1     |
| RPS17       | 11 | -0.5136211 | 3.72E-16 | 6.79E-12   | 1     | 1     |
| KHDRBS3     | 11 | -0.5146595 | 1.44E-08 | 0.00026246 | 0.014 | 0.409 |
| RPL9        | 11 | -0.5155455 | 1.12E-13 | 2.04E-09   | 1     | 1     |
| CCDC8       | 11 | -0.5219712 | 9.72E-08 | 0.00177312 | 0.043 | 0.424 |
| RPL3        | 11 | -0.5251664 | 9.37E-08 | 0.00171023 | 0.986 | 1     |
| TUBB        | 11 | -0.5257142 | 4.28E-07 | 0.00781503 | 0.757 | 0.924 |
| CP          | 11 | -0.5299029 | 5.26E-08 | 0.00096001 | 0.329 | 0.803 |
| RPS16       | 11 | -0.5313713 | 1.44E-11 | 2.63E-07   | 1     | 1     |
| MALAT1      | 11 | -0.5336387 | 1.19E-07 | 0.00217413 | 1     | 1     |
| YBX3        | 11 | -0.5357646 | 1.82E-07 | 0.00331299 | 0.729 | 0.97  |
| B2M         | 11 | -0.5388648 | 4.18E-08 | 0.00076236 | 1     | 1     |
| RPLP2       | 11 | -0.5421644 | 3.74E-13 | 6.82E-09   | 1     | 1     |
| P4HB        | 11 | -0.5425852 | 3.10E-07 | 0.00565514 | 0.771 | 0.985 |
| GLTSCR2     | 11 | -0.5539178 | 2.60E-07 | 0.00475105 | 0.757 | 0.985 |
| EIF3L       | 11 | -0.5609324 | 7.68E-07 | 0.01400457 | 0.771 | 0.955 |

|         |         |            |          |            |       |       |
|---------|---------|------------|----------|------------|-------|-------|
| PEBP1   | 11      | -0.5675914 | 2.51E-07 | 0.0045758  | 0.757 | 0.924 |
| S100A13 | 11      | -0.5677686 | 4.75E-08 | 0.00086604 | 0.957 | 1     |
| NGFRAP1 | 11      | -0.5716945 | 1.36E-07 | 0.00248762 | 0.771 | 0.939 |
| RPL23   | 11      | -0.5768238 | 2.92E-09 | 5.33E-05   | 0.986 | 1     |
| EEF1B2  | 11      | -0.5788828 | 9.93E-09 | 0.00018118 | 0.957 | 1     |
| RPSA    | 11      | -0.5797277 | 7.06E-09 | 0.00012889 | 0.971 | 1     |
| RPL7    | 11      | -0.5826358 | 1.21E-11 | 2.21E-07   | 1     | 1     |
| RPL23A  | 11      | -0.5955264 | 5.19E-12 | 9.47E-08   | 1     | 1     |
| RPS3A   | 11      | -0.5964054 | 1.68E-14 | 3.06E-10   | 1     | 1     |
| NEAT1   | 11      | -0.6050749 | 7.05E-08 | 0.00128566 | 0.986 | 1     |
| CHRD2   | 11      | -0.6125681 | 2.14E-06 | 0.03896429 | 0.043 | 0.364 |
| EIF4B   | 11      | -0.6148785 | 1.21E-07 | 0.00220239 | 0.629 | 0.909 |
| EIF3H   | 11      | -0.6377495 | 1.04E-08 | 0.00018994 | 0.871 | 0.985 |
| CITED2  | 11      | -0.6382288 | 1.14E-06 | 0.02088373 | 0.229 | 0.606 |
| FXVD6   | 11      | -0.6662742 | 8.66E-11 | 1.58E-06   | 0.6   | 0.97  |
| TPT1    | 11      | -0.6735686 | 3.28E-12 | 5.98E-08   | 1     | 1     |
| RPS8    | 11      | -0.6790103 | 8.66E-13 | 1.58E-08   | 1     | 1     |
| CRTAP   | 11      | -0.6817834 | 1.03E-08 | 0.0001876  | 0.443 | 0.818 |
| SPARC   | 11      | -0.6929893 | 5.25E-09 | 9.58E-05   | 0.257 | 0.758 |
| RPL10A  | 11      | -0.740579  | 6.73E-12 | 1.23E-07   | 1     | 0.985 |
| CAPS    | 11      | -0.7545225 | 1.11E-06 | 0.0203453  | 0.543 | 0.909 |
| HNRNPA1 | 11      | -0.7608766 | 2.72E-10 | 4.96E-06   | 0.943 | 1     |
| RPL4    | 11      | -0.7693492 | 2.48E-17 | 4.52E-13   | 1     | 1     |
| EEF2    | 11      | -0.80294   | 8.81E-10 | 1.61E-05   | 0.957 | 0.97  |
| CCNI    | 11      | -0.8064971 | 3.78E-15 | 6.89E-11   | 0.971 | 1     |
| PLAC9   | 11      | -0.831619  | 9.04E-08 | 0.00164883 | 0.6   | 0.879 |
| RPLP0   | 11      | -0.8604061 | 3.97E-16 | 7.25E-12   | 1     | 1     |
| EEF1A1  | 11      | -0.8874561 | 1.03E-08 | 0.00018724 | 1     | 1     |
| ADIRF   | 11      | -0.8897201 | 1.24E-08 | 0.00022565 | 0.457 | 0.894 |
| RPS11   | 11      | -0.9544895 | 8.97E-21 | 1.64E-16   | 0.986 | 1     |
| PAX1    | 11      | -0.9687618 | 1.50E-11 | 2.74E-07   | 0.357 | 0.909 |
| COL2A1  | 11      | -0.9849192 | 2.17E-13 | 3.95E-09   | 0.3   | 0.909 |
| RPS20   | 11      | -1.0527418 | 3.16E-20 | 5.76E-16   | 0.957 | 1     |
| OGN     | 11      | -1.1033124 | 6.47E-10 | 1.18E-05   | 0.529 | 0.955 |
| CLEC3A  | 11      | -1.2628133 | 8.42E-10 | 1.54E-05   | 0.243 | 0.727 |
| SPTSSB  | 11      | -1.3938416 | 3.69E-14 | 6.74E-10   | 0     | 0.606 |
| SLPI    | 11      | -1.7754131 | 3.50E-07 | 0.00639374 | 0.929 | 1     |
| FRZB    | 11      | -2.185239  | 5.92E-14 | 1.08E-09   | 0.114 | 0.742 |
| gene    | cluster | avg_logFC  | p_val    | p_val_adj  | pct.1 | pct.2 |



|          |    |            |          |            |      |       |
|----------|----|------------|----------|------------|------|-------|
| SPP1     | 12 | 2.1653184  | 2.99E-12 | 5.46E-08   | 0.75 | 0.087 |
| COMP     | 12 | 2.13197035 | 1.71E-17 | 3.11E-13   | 0.99 | 0.674 |
| PRG4     | 12 | 1.9056579  | 1.48E-09 | 2.70E-05   | 0.56 | 0.022 |
| PTGS2    | 12 | 1.69615063 | 1.56E-15 | 2.85E-11   | 0.8  | 0.043 |
| CHI3L2   | 12 | 1.47984346 | 1.31E-10 | 2.39E-06   | 0.96 | 0.783 |
| PLA2G2A  | 12 | 1.37491036 | 2.00E-10 | 3.65E-06   | 0.77 | 0.152 |
| MT1X     | 12 | 1.35512314 | 1.63E-06 | 0.02981531 | 1    | 0.978 |
| VEGFA    | 12 | 1.35135271 | 3.41E-15 | 6.22E-11   | 0.91 | 0.283 |
| TGFBI    | 12 | 1.32760536 | 2.61E-14 | 4.76E-10   | 0.82 | 0.13  |
| IGFBP3   | 12 | 1.19392247 | 1.51E-07 | 0.00275223 | 0.44 | 0     |
| ERO1A    | 12 | 1.17144961 | 2.91E-10 | 5.30E-06   | 0.79 | 0.304 |
| SLC2A1   | 12 | 1.0182564  | 1.02E-11 | 1.86E-07   | 0.75 | 0.152 |
| CA9      | 12 | 1.01262312 | 8.43E-11 | 1.54E-06   | 0.77 | 0.217 |
| BHLHE40  | 12 | 0.95291192 | 1.10E-08 | 0.00020031 | 0.79 | 0.37  |
| SOD2     | 12 | 0.92615775 | 4.74E-07 | 0.00864894 | 1    | 0.957 |
| FN1      | 12 | 0.90736366 | 8.82E-13 | 1.61E-08   | 1    | 1     |
| PTP4A1   | 12 | 0.86956244 | 2.73E-09 | 4.99E-05   | 0.78 | 0.326 |
| PPP3CA   | 12 | 0.86777795 | 4.34E-09 | 7.92E-05   | 0.93 | 0.696 |
| BZW1     | 12 | 0.85589864 | 8.92E-09 | 0.00016273 | 0.85 | 0.435 |
| TIMP1    | 12 | 0.84144403 | 1.25E-06 | 0.02282832 | 1    | 1     |
| TMEM45A  | 12 | 0.82851994 | 1.91E-08 | 0.00034796 | 0.94 | 0.783 |
| SLC3A2   | 12 | 0.80785562 | 7.89E-08 | 0.00144017 | 0.81 | 0.522 |
| GAPDH    | 12 | 0.74388554 | 1.06E-12 | 1.94E-08   | 1    | 1     |
| TREM1    | 12 | 0.72754861 | 6.09E-08 | 0.00111111 | 0.46 | 0     |
| CCDC85B  | 12 | 0.71548573 | 9.51E-08 | 0.00173515 | 0.96 | 0.848 |
| ENO2     | 12 | 0.69080678 | 4.88E-08 | 0.00088975 | 0.81 | 0.413 |
| GBE1     | 12 | 0.68980828 | 1.34E-06 | 0.02446321 | 0.8  | 0.565 |
| AK2      | 12 | 0.62794789 | 1.09E-07 | 0.00199483 | 0.92 | 0.63  |
| SLC25A36 | 12 | 0.59472769 | 5.67E-08 | 0.00103525 | 0.75 | 0.348 |
| ARPP19   | 12 | 0.5827369  | 2.75E-07 | 0.00501103 | 0.79 | 0.413 |
| ATP6V1G1 | 12 | 0.56144699 | 5.90E-08 | 0.00107708 | 0.98 | 0.978 |
| NAMPT    | 12 | 0.5282157  | 2.38E-06 | 0.04350577 | 0.82 | 0.543 |
| PHPT1    | 12 | 0.49014261 | 1.20E-06 | 0.02181302 | 0.89 | 0.565 |
| RPS14    | 12 | -0.2657032 | 1.91E-06 | 0.03483105 | 1    | 1     |
| RPL35A   | 12 | -0.2872744 | 1.32E-07 | 0.00240187 | 1    | 1     |
| KHDRBS3  | 12 | -0.2885427 | 8.14E-07 | 0.01484988 | 0.01 | 0.261 |
| AGT      | 12 | -0.2933547 | 2.26E-06 | 0.04122732 | 0.06 | 0.37  |
| RPS21    | 12 | -0.2973327 | 1.62E-06 | 0.02957353 | 1    | 1     |
| RPS28    | 12 | -0.2980332 | 4.22E-08 | 0.00077056 | 1    | 1     |

|         |    |            |          |            |      |       |
|---------|----|------------|----------|------------|------|-------|
| RPL7A   | 12 | -0.2982749 | 1.89E-07 | 0.00345086 | 1    | 1     |
| RPS25   | 12 | -0.3020927 | 1.39E-07 | 0.00254347 | 1    | 1     |
| RPL35   | 12 | -0.3117989 | 8.94E-09 | 0.00016312 | 1    | 1     |
| RPL27A  | 12 | -0.3169626 | 7.95E-09 | 0.00014506 | 1    | 1     |
| RPS3    | 12 | -0.3175156 | 1.98E-09 | 3.62E-05   | 1    | 1     |
| RPL3    | 12 | -0.3179153 | 1.21E-07 | 0.00221205 | 1    | 1     |
| FTL     | 12 | -0.3247783 | 7.74E-07 | 0.01412453 | 1    | 1     |
| RPS9    | 12 | -0.3325275 | 5.27E-09 | 9.62E-05   | 1    | 1     |
| RPSA    | 12 | -0.3344645 | 1.56E-06 | 0.02838444 | 1    | 1     |
| C14orf1 | 12 | -0.334696  | 2.20E-06 | 0.04017465 | 0.11 | 0.457 |
| RPL37A  | 12 | -0.3448822 | 1.92E-09 | 3.50E-05   | 1    | 1     |
| RPS6    | 12 | -0.3465861 | 5.85E-10 | 1.07E-05   | 1    | 1     |
| RPL13   | 12 | -0.3478486 | 1.34E-10 | 2.45E-06   | 1    | 1     |
| RPS4X   | 12 | -0.3533099 | 6.14E-09 | 0.00011211 | 1    | 1     |
| NACA    | 12 | -0.3540809 | 1.73E-08 | 0.00031493 | 1    | 1     |
| SNRPA   | 12 | -0.361847  | 8.38E-07 | 0.01528893 | 0.09 | 0.435 |
| RPL21   | 12 | -0.3621964 | 4.51E-11 | 8.22E-07   | 1    | 1     |
| RPLP1   | 12 | -0.371695  | 7.33E-09 | 0.00013374 | 1    | 1     |
| RPS27   | 12 | -0.3744513 | 1.46E-11 | 2.67E-07   | 1    | 1     |
| RPL8    | 12 | -0.3896107 | 4.94E-10 | 9.01E-06   | 1    | 1     |
| BGN     | 12 | -0.3945471 | 1.68E-06 | 0.03059281 | 1    | 1     |
| CXXC5   | 12 | -0.3948178 | 1.37E-06 | 0.02502633 | 0.04 | 0.326 |
| RPL18A  | 12 | -0.3965494 | 1.75E-10 | 3.19E-06   | 1    | 1     |
| RPS5    | 12 | -0.4019529 | 2.64E-10 | 4.81E-06   | 1    | 1     |
| RPL13A  | 12 | -0.4055957 | 4.78E-13 | 8.73E-09   | 1    | 1     |
| UBA52   | 12 | -0.4077179 | 4.45E-11 | 8.11E-07   | 1    | 1     |
| RPS18   | 12 | -0.4085125 | 1.85E-10 | 3.37E-06   | 1    | 1     |
| RPL29   | 12 | -0.4181202 | 9.72E-11 | 1.77E-06   | 1    | 1     |
| RPL9    | 12 | -0.4219641 | 7.26E-12 | 1.32E-07   | 1    | 1     |
| RPS23   | 12 | -0.4251653 | 1.20E-12 | 2.18E-08   | 1    | 1     |
| VIM     | 12 | -0.4270429 | 5.12E-08 | 0.00093508 | 1    | 1     |
| S100A13 | 12 | -0.4279007 | 1.39E-06 | 0.02531325 | 0.97 | 1     |
| BTF3    | 12 | -0.4279896 | 6.57E-10 | 1.20E-05   | 1    | 1     |
| HINT1   | 12 | -0.4308283 | 2.16E-06 | 0.03936143 | 0.93 | 1     |
| RPL27   | 12 | -0.4322871 | 3.66E-09 | 6.68E-05   | 1    | 1     |
| RPL37   | 12 | -0.4340183 | 2.73E-12 | 4.98E-08   | 1    | 1     |
| TXN     | 12 | -0.438203  | 1.84E-07 | 0.0033609  | 0.56 | 0.935 |
| ATP5G2  | 12 | -0.4426469 | 3.17E-08 | 0.00057844 | 1    | 1     |
| RPL14   | 12 | -0.449427  | 6.37E-14 | 1.16E-09   | 1    | 1     |

|          |    |            |          |            |      |       |
|----------|----|------------|----------|------------|------|-------|
| RPL30    | 12 | -0.4498543 | 5.79E-11 | 1.06E-06   | 1    | 1     |
| RAC1     | 12 | -0.4560569 | 3.73E-07 | 0.00680071 | 0.82 | 0.978 |
| COMMD6   | 12 | -0.4572984 | 2.87E-09 | 5.25E-05   | 1    | 1     |
| NPM1     | 12 | -0.4583933 | 1.18E-08 | 0.00021494 | 0.99 | 1     |
| S100A1   | 12 | -0.4597637 | 1.37E-06 | 0.02493779 | 1    | 1     |
| GSTP1    | 12 | -0.4622159 | 3.33E-09 | 6.08E-05   | 0.96 | 1     |
| EIF3D    | 12 | -0.4626564 | 1.32E-06 | 0.02417121 | 0.74 | 0.891 |
| RPL10    | 12 | -0.465285  | 2.20E-12 | 4.01E-08   | 1    | 1     |
| PPIA     | 12 | -0.4718053 | 4.38E-07 | 0.0079886  | 0.87 | 1     |
| RPL19    | 12 | -0.473458  | 3.63E-16 | 6.62E-12   | 1    | 1     |
| RPS2     | 12 | -0.4761027 | 5.50E-14 | 1.00E-09   | 1    | 1     |
| IER2     | 12 | -0.4772859 | 5.88E-07 | 0.01072938 | 0.13 | 0.5   |
| SEC11A   | 12 | -0.4801348 | 1.97E-07 | 0.00360062 | 0.72 | 0.978 |
| MTDH     | 12 | -0.4806834 | 1.14E-06 | 0.02089216 | 0.4  | 0.804 |
| PLAC9    | 12 | -0.4897595 | 1.78E-06 | 0.0324549  | 0.72 | 0.978 |
| C19orf43 | 12 | -0.4929535 | 1.05E-06 | 0.01917931 | 0.68 | 0.913 |
| PFN1     | 12 | -0.4966899 | 6.44E-07 | 0.01175552 | 0.74 | 0.935 |
| PSMA7    | 12 | -0.5077152 | 5.24E-08 | 0.00095583 | 0.72 | 0.957 |
| HNRNPA1  | 12 | -0.5080295 | 6.85E-09 | 0.00012503 | 0.98 | 1     |
| CCDC102B | 12 | -0.5082648 | 1.82E-11 | 3.32E-07   | 0.02 | 0.457 |
| MYL6     | 12 | -0.5084937 | 5.21E-08 | 0.00095122 | 0.84 | 0.978 |
| RPS27A   | 12 | -0.5101565 | 2.10E-16 | 3.84E-12   | 1    | 1     |
| EIF3L    | 12 | -0.5108256 | 1.93E-07 | 0.00352835 | 0.8  | 1     |
| RPL23    | 12 | -0.5112008 | 1.81E-09 | 3.30E-05   | 0.99 | 1     |
| RPS7     | 12 | -0.5188029 | 1.84E-13 | 3.36E-09   | 1    | 1     |
| RPS3A    | 12 | -0.5218197 | 9.20E-16 | 1.68E-11   | 1    | 1     |
| HLA-C    | 12 | -0.5236506 | 4.31E-09 | 7.86E-05   | 0.95 | 1     |
| P4HB     | 12 | -0.5298121 | 2.52E-06 | 0.04605434 | 0.68 | 0.913 |
| RPS17    | 12 | -0.5339444 | 8.31E-13 | 1.52E-08   | 1    | 1     |
| RPL23A   | 12 | -0.5353327 | 2.10E-15 | 3.83E-11   | 1    | 1     |
| BRK1     | 12 | -0.5381178 | 1.01E-07 | 0.0018452  | 0.67 | 0.935 |
| PRUNE2   | 12 | -0.5384437 | 6.28E-09 | 0.00011461 | 0.16 | 0.609 |
| RPS29    | 12 | -0.5400445 | 3.28E-13 | 5.99E-09   | 1    | 1     |
| RPS13    | 12 | -0.5528283 | 1.77E-15 | 3.23E-11   | 1    | 1     |
| TCF4     | 12 | -0.5555381 | 2.91E-07 | 0.00531863 | 0.12 | 0.5   |
| EEF1B2   | 12 | -0.5569002 | 7.87E-10 | 1.44E-05   | 0.95 | 1     |
| HOXC10   | 12 | -0.5673183 | 2.06E-07 | 0.00375733 | 0.55 | 0.87  |
| HLA-B    | 12 | -0.5710469 | 2.55E-08 | 0.00046529 | 0.91 | 1     |
| KDELR2   | 12 | -0.5721651 | 2.03E-08 | 0.00037024 | 0.53 | 0.913 |

|         |    |            |          |            |      |       |
|---------|----|------------|----------|------------|------|-------|
| SSR3    | 12 | -0.5819133 | 5.25E-08 | 0.00095857 | 0.77 | 0.935 |
| TUBB    | 12 | -0.5830339 | 1.38E-07 | 0.00251505 | 0.51 | 0.913 |
| HLA-A   | 12 | -0.5851871 | 1.50E-07 | 0.00273109 | 0.99 | 0.978 |
| RPL34   | 12 | -0.5861989 | 9.25E-17 | 1.69E-12   | 1    | 1     |
| ISLR    | 12 | -0.5893172 | 7.73E-07 | 0.01410586 | 0.21 | 0.565 |
| ATRNL1  | 12 | -0.5904265 | 2.47E-10 | 4.51E-06   | 0.06 | 0.5   |
| RPS16   | 12 | -0.5924019 | 2.46E-17 | 4.49E-13   | 1    | 1     |
| RPLP2   | 12 | -0.5950844 | 2.02E-15 | 3.69E-11   | 1    | 1     |
| RPL18   | 12 | -0.5981102 | 5.68E-17 | 1.04E-12   | 1    | 1     |
| EID1    | 12 | -0.6128361 | 3.60E-10 | 6.56E-06   | 0.93 | 1     |
| RPL7    | 12 | -0.6138012 | 1.40E-15 | 2.55E-11   | 1    | 1     |
| TPM1    | 12 | -0.6223781 | 1.37E-06 | 0.02496595 | 0.26 | 0.674 |
| THY1    | 12 | -0.623766  | 1.62E-06 | 0.02952433 | 0.14 | 0.5   |
| EEF1A1  | 12 | -0.6544882 | 9.27E-19 | 1.69E-14   | 1    | 1     |
| CP      | 12 | -0.6603119 | 1.53E-09 | 2.79E-05   | 0.56 | 1     |
| RPLP0   | 12 | -0.6777741 | 2.07E-15 | 3.78E-11   | 1    | 1     |
| CD9     | 12 | -0.6959899 | 8.72E-07 | 0.01590906 | 0.4  | 0.761 |
| SLC40A1 | 12 | -0.6964861 | 1.39E-11 | 2.54E-07   | 0.04 | 0.5   |
| TPT1    | 12 | -0.7103659 | 6.34E-20 | 1.16E-15   | 1    | 1     |
| RPL10A  | 12 | -0.7215033 | 1.59E-16 | 2.90E-12   | 1    | 1     |
| COL2A1  | 12 | -0.7300088 | 3.72E-08 | 0.00067796 | 0.49 | 0.848 |
| NPC2    | 12 | -0.7301027 | 2.65E-15 | 4.83E-11   | 0.96 | 1     |
| RPS8    | 12 | -0.7308014 | 2.24E-16 | 4.09E-12   | 1    | 1     |
| SLC25A3 | 12 | -0.7367885 | 6.40E-12 | 1.17E-07   | 0.54 | 0.978 |
| RPL4    | 12 | -0.7412238 | 6.18E-17 | 1.13E-12   | 1    | 1     |
| H3F3A   | 12 | -0.7516828 | 1.79E-10 | 3.26E-06   | 0.82 | 1     |
| YBX3    | 12 | -0.7518362 | 6.76E-12 | 1.23E-07   | 0.63 | 0.957 |
| INHBA   | 12 | -0.7852625 | 4.06E-10 | 7.40E-06   | 0.1  | 0.565 |
| GREM1   | 12 | -0.795577  | 2.85E-08 | 0.00052065 | 0.03 | 0.37  |
| EIF3H   | 12 | -0.7988511 | 1.11E-14 | 2.02E-10   | 0.95 | 1     |
| CRTAP   | 12 | -0.8009202 | 7.91E-14 | 1.44E-09   | 0.39 | 0.935 |
| CCNI    | 12 | -0.8038342 | 2.18E-14 | 3.97E-10   | 0.97 | 1     |
| ID3     | 12 | -0.8082775 | 6.00E-08 | 0.00109398 | 0.23 | 0.652 |
| RHOBTB3 | 12 | -0.8135701 | 2.31E-08 | 0.00042234 | 0.35 | 0.739 |
| MT-ND4  | 12 | -0.8319911 | 6.47E-08 | 0.00118066 | 0.89 | 0.957 |
| CITED2  | 12 | -0.8395418 | 5.89E-07 | 0.01075431 | 0.16 | 0.522 |
| NEAT1   | 12 | -0.8479518 | 7.47E-12 | 1.36E-07   | 0.99 | 1     |
| ACTG1   | 12 | -0.8488495 | 1.34E-11 | 2.44E-07   | 0.91 | 1     |
| MT-ND1  | 12 | -0.8532214 | 4.86E-10 | 8.86E-06   | 0.24 | 0.717 |

| CAPS    | 12      | -0.8605595 | 3.24E-09 | 5.91E-05   | 0.64  | 0.957 |
|---------|---------|------------|----------|------------|-------|-------|
| FTH1    | 12      | -0.8774083 | 2.98E-15 | 5.43E-11   | 1     | 1     |
| ZFP36L2 | 12      | -0.889202  | 3.47E-11 | 6.33E-07   | 0.07  | 0.543 |
| TSC22D1 | 12      | -0.8924268 | 4.04E-09 | 7.38E-05   | 0.52  | 0.935 |
| B2M     | 12      | -0.8984013 | 3.28E-16 | 5.98E-12   | 1     | 1     |
| SPARC   | 12      | -0.9318217 | 5.76E-13 | 1.05E-08   | 0.19  | 0.761 |
| MT-ATP6 | 12      | -0.9788692 | 2.54E-11 | 4.63E-07   | 0.64  | 0.935 |
| GPX3    | 12      | -0.9828652 | 1.10E-11 | 2.01E-07   | 0.92  | 1     |
| MT-CYB  | 12      | -0.9893096 | 2.38E-09 | 4.34E-05   | 0.42  | 0.804 |
| C2orf82 | 12      | -1.002728  | 1.97E-12 | 3.59E-08   | 0.92  | 1     |
| RPS11   | 12      | -1.0150968 | 1.41E-20 | 2.58E-16   | 0.99  | 1     |
| CYR61   | 12      | -1.0395182 | 1.93E-06 | 0.03525837 | 0.16  | 0.5   |
| RPS20   | 12      | -1.0482208 | 2.28E-21 | 4.15E-17   | 0.99  | 1     |
| PAX1    | 12      | -1.0498221 | 5.45E-14 | 9.95E-10   | 0.42  | 0.935 |
| MT-CO3  | 12      | -1.0966143 | 2.83E-10 | 5.16E-06   | 0.74  | 0.935 |
| MT-ND2  | 12      | -1.0978018 | 3.40E-13 | 6.21E-09   | 0.3   | 0.848 |
| CLEC3A  | 12      | -1.1061018 | 1.18E-10 | 2.15E-06   | 0.41  | 0.87  |
| MGP     | 12      | -1.1491314 | 1.76E-10 | 3.22E-06   | 0.99  | 1     |
| MT-CO1  | 12      | -1.162885  | 4.47E-11 | 8.16E-07   | 0.89  | 0.978 |
| OGN     | 12      | -1.2486699 | 4.96E-10 | 9.05E-06   | 0.93  | 1     |
| MT-CO2  | 12      | -1.3130904 | 6.40E-12 | 1.17E-07   | 0.78  | 1     |
| ADIRF   | 12      | -1.3883303 | 5.01E-15 | 9.15E-11   | 0.29  | 0.848 |
| MT-ND3  | 12      | -1.4187312 | 5.02E-18 | 9.16E-14   | 0.26  | 0.913 |
| SPTSSB  | 12      | -1.6847873 | 4.14E-22 | 7.55E-18   | 0     | 0.739 |
| FRZB    | 12      | -2.4847232 | 6.44E-19 | 1.18E-14   | 0.28  | 0.935 |
| gene    | cluster | avg_logFC  | p_val    | p_val_adj  | pct.1 | pct.2 |
| PLA2G2A | 13      | 2.20542134 | 2.73E-07 | 0.00497642 | 0.867 | 0.143 |
| MT1G    | 13      | 1.97263322 | 1.90E-06 | 0.03472442 | 1     | 0.619 |
| CHI3L2  | 13      | 1.81807678 | 2.99E-07 | 0.00545487 | 0.933 | 0.19  |
| TGFBI   | 13      | 1.56800299 | 3.63E-07 | 0.0066215  | 0.933 | 0.381 |
| RPS20   | 13      | -0.8020567 | 7.62E-08 | 0.00139086 | 1     | 1     |
| RPS11   | 13      | -0.9206104 | 3.44E-07 | 0.00627246 | 0.967 | 1     |
| S100A4  | 13      | -1.5733487 | 2.45E-06 | 0.04470656 | 0.7   | 0.952 |
