# Supplementary material for: Single-Cell RNA-Seq Analysis of Cells from Degenerating and Non-Degenerating Intervertebral Discs from the Same Individual Reveals New Biomarkers for Intervertebral Disc Degeneration
Source: MDPI journal article supplement (doi:10.3390/ijms23073993), 2022-04-03
Supplement: s1 [file s1]

**Table S2.** Cluster markers.

| gene         | cluster | avg_logFC  | p_val       | p_val_adj   | pct.1 | pct.2 |
|--------------|---------|------------|-------------|-------------|-------|-------|
| SOD2         | 0       | 0.41950552 | 1.0047E-108 | 1.8332E-104 | 0.974 | 0.877 |
| FRZB         | 0       | 0.40009756 | 2.05252E-29 | 3.74523E-25 | 0.578 | 0.499 |
| CHI3L1       | 0       | 0.39754308 | 1.35121E-65 | 2.46556E-61 | 0.955 | 0.912 |
| NPM1         | 0       | 0.32286647 | 3.8811E-205 | 7.0818E-201 | 1     | 0.995 |
| DDIT4L       | 0       | 0.31757729 | 5.91416E-55 | 1.07916E-50 | 0.732 | 0.604 |
| ZFAS1        | 0       | 0.30343857 | 8.9199E-202 | 1.6276E-197 | 0.999 | 0.983 |
| EIF4A2       | 0       | 0.30287229 | 9.1187E-157 | 1.6639E-152 | 0.998 | 0.965 |
| CIRBP        | 0       | 0.30091505 | 2.6584E-189 | 4.8508E-185 | 0.998 | 0.978 |
| EPB41L4A-AS1 | 0       | 0.29815642 | 5.225E-134  | 9.534E-130  | 0.923 | 0.793 |
| GADD45A      | 0       | 0.29716921 | 1.75641E-72 | 3.20492E-68 | 0.501 | 0.33  |
| RSL24D1      | 0       | 0.29600174 | 3.9587E-163 | 7.2234E-159 | 0.989 | 0.93  |
| SNHG12       | 0       | 0.28992616 | 3.50952E-81 | 6.40383E-77 | 0.544 | 0.366 |
| EIF1         | 0       | 0.28367582 | 3.9354E-182 | 7.181E-178  | 1     | 1     |
| ANP32B       | 0       | 0.27400809 | 5.9054E-118 | 1.0776E-113 | 0.949 | 0.86  |
| RGS2         | 0       | 0.27175231 | 1.75784E-22 | 3.20754E-18 | 0.464 | 0.377 |
| UBXN1        | 0       | 0.26530636 | 1.1859E-104 | 2.1639E-100 | 0.828 | 0.7   |
| SYF2         | 0       | 0.26423483 | 7.1837E-105 | 1.3108E-100 | 0.882 | 0.751 |
| EIF3E        | 0       | 0.2509564  | 9.1058E-117 | 1.6615E-112 | 0.999 | 0.988 |
| gene         | cluster | avg_logFC  | p_val       | p_val_adj   | pct.1 | pct.2 |
| FGFBP2       | 1       | 0.79747726 | 0           | 0           | 0.995 | 0.911 |
| CLEC3A       | 1       | 0.76001412 | 2.3064E-154 | 4.2084E-150 | 0.729 | 0.512 |
| OGN          | 1       | 0.75482998 | 3.29E-237   | 6.0033E-233 | 0.951 | 0.838 |
| C2orf40      | 1       | 0.65879817 | 3.5161E-219 | 6.4159E-215 | 0.997 | 0.96  |
| SLPI         | 1       | 0.60405173 | 7.29848E-91 | 1.33175E-86 | 0.972 | 0.92  |
| C2orf82      | 1       | 0.59792332 | 2.2595E-191 | 4.1229E-187 | 0.991 | 0.945 |
| PRELP        | 1       | 0.58609273 | 1.8571E-241 | 3.3886E-237 | 0.986 | 0.914 |
| LECT1        | 1       | 0.52414331 | 1.6686E-198 | 3.0446E-194 | 0.922 | 0.748 |
| APOD         | 1       | 0.48160145 | 2.18869E-73 | 3.99371E-69 | 0.501 | 0.333 |
| IGFBP6       | 1       | 0.46993258 | 7.38664E-97 | 1.34784E-92 | 0.78  | 0.62  |
| RBP4         | 1       | 0.4622583  | 5.4443E-126 | 9.9343E-122 | 0.868 | 0.712 |
| TSC22D1      | 1       | 0.43258866 | 7.79953E-67 | 1.42318E-62 | 0.796 | 0.707 |
| MIA          | 1       | 0.42535463 | 4.707E-205  | 8.5889E-201 | 0.996 | 0.954 |
| CST3         | 1       | 0.39576885 | 2.9146E-192 | 5.3183E-188 | 0.998 | 0.986 |
| ITM2A        | 1       | 0.38799962 | 5.1138E-120 | 9.3311E-116 | 0.702 | 0.489 |

| MGP      | 1       | 0.36442408 | 1.3731E-82  | 2.5055E-78  | 0.998 | 0.995 |
|----------|---------|------------|-------------|-------------|-------|-------|
| IVNS1ABP | 1       | 0.33443427 | 2.39923E-94 | 4.37788E-90 | 0.843 | 0.708 |
| FMOD     | 1       | 0.33121741 | 3.9432E-131 | 7.1951E-127 | 0.965 | 0.873 |
| S100B    | 1       | 0.30855962 | 1.0303E-85  | 1.87999E-81 | 0.86  | 0.727 |
| ISLR     | 1       | 0.30793285 | 3.06309E-62 | 5.58922E-58 | 0.601 | 0.451 |
| CRISPLD1 | 1       | 0.30323379 | 4.83979E-38 | 8.83117E-34 | 0.36  | 0.242 |
| SERPINA5 | 1       | 0.30207559 | 2.29492E-89 | 4.18753E-85 | 0.686 | 0.497 |
| SLC40A1  | 1       | 0.29988706 | 1.43507E-57 | 2.61858E-53 | 0.415 | 0.261 |
| TMEM59   | 1       | 0.29506021 | 8.765E-129  | 1.5994E-124 | 0.997 | 0.966 |
| DCN      | 1       | 0.29038518 | 2.1265E-117 | 3.8803E-113 | 1     | 0.997 |
| ITM2C    | 1       | 0.28591766 | 2.93626E-70 | 5.35779E-66 | 0.682 | 0.529 |
| SLC14A1  | 1       | 0.28122229 | 4.75561E-60 | 8.67757E-56 | 0.505 | 0.353 |
| PAX1     | 1       | 0.26870844 | 6.65891E-45 | 1.21505E-40 | 0.737 | 0.651 |
| SSR4     | 1       | 0.26715138 | 1.5519E-108 | 2.8317E-104 | 0.984 | 0.954 |
| CAPS     | 1       | 0.2667153  | 1.23976E-58 | 2.26218E-54 | 0.847 | 0.723 |
| XAGE2    | 1       | 0.25727565 | 1.50845E-17 | 2.75247E-13 | 0.149 | 0.092 |
| PRDX4    | 1       | 0.25448151 | 2.95974E-85 | 5.40065E-81 | 0.867 | 0.742 |
| SCRG1    | 1       | 0.25248237 | 1.2433E-99  | 2.2686E-95  | 0.998 | 0.971 |
| HLA-C    | 1       | 0.25221995 | 2.70276E-66 | 4.93173E-62 | 0.926 | 0.863 |
| CCDC80   | 1       | 0.2517931  | 1.83052E-42 | 3.34015E-38 | 0.954 | 0.895 |
| gene     | cluster | avg_logFC  | p_val       | p_val_adj   | pct.1 | pct.2 |
| MT1G     | 2       | 1.69951687 | 0           | 0           | 0.999 | 0.892 |
| MT1H     | 2       | 1.52952008 | 0           | 0           | 0.955 | 0.589 |
| MT1F     | 2       | 1.27147422 | 0           | 0           | 0.989 | 0.852 |
| MT1X     | 2       | 1.22879532 | 0           | 0           | 1     | 0.992 |
| MT1E     | 2       | 1.05954523 | 0           | 0           | 1     | 0.961 |
| MT2A     | 2       | 0.83331624 | 1.2184E-255 | 2.2232E-251 | 1     | 0.995 |
| MT1M     | 2       | 0.59045262 | 2.3735E-127 | 4.331E-123  | 0.734 | 0.487 |
| gene     | cluster | avg_logFC  | p_val       | p_val_adj   | pct.1 | pct.2 |
| CXCL8    | 3       | 1.4626932  | 7.32048E-74 | 1.33577E-69 | 0.201 | 0.065 |
| G0S2     | 3       | 1.46055786 | 5.4926E-122 | 1.0022E-117 | 0.482 | 0.23  |
| C15orf48 | 3       | 1.24588459 | 0           | 0           | 0.415 | 0.078 |
| SOD2     | 3       | 1.23316654 | 0           | 0           | 0.998 | 0.885 |
| CCL20    | 3       | 1.04476805 | 7.51E-91    | 1.37E-86    | 0.147 | 0.03  |
| MT1H     | 3       | 1.0244411  | 1.2022E-165 | 2.1937E-161 | 0.855 | 0.612 |
| MMP3     | 3       | 1.00119489 | 1.6321E-178 | 2.9781E-174 | 0.914 | 0.73  |
| MT1G     | 3       | 0.97929123 | 7.7395E-180 | 1.4122E-175 | 0.983 | 0.897 |
| MT2A     | 3       | 0.96230984 | 3.5627E-257 | 6.5008E-253 | 1     | 0.996 |
| WTAP     | 3       | 0.9343821  | 7.91E-197   | 1.44E-192   | 0.898 | 0.669 |

|           |   |            |             |             |       |       |
|-----------|---|------------|-------------|-------------|-------|-------|
| NFKBIA    | 3 | 0.82866962 | 7.623E-138  | 1.391E-133  | 0.549 | 0.265 |
| LCN2      | 3 | 0.79270775 | 1.93611E-57 | 3.53283E-53 | 0.611 | 0.423 |
| MT1X      | 3 | 0.77746521 | 4.8047E-160 | 8.7671E-156 | 1     | 0.993 |
| IER3      | 3 | 0.70657222 | 3.46E-118   | 6.31E-114   | 0.505 | 0.24  |
| SERPINE2  | 3 | 0.69686501 | 1.4749E-130 | 2.6912E-126 | 0.998 | 0.995 |
| MT1E      | 3 | 0.69244666 | 6.3724E-148 | 1.1628E-143 | 0.994 | 0.963 |
| SLC7A2    | 3 | 0.69077725 | 2.3744E-286 | 4.3325E-282 | 0.474 | 0.114 |
| MT1M      | 3 | 0.67955764 | 1.9433E-122 | 3.546E-118  | 0.743 | 0.495 |
| SPP1      | 3 | 0.64450646 | 7.21225E-31 | 1.31602E-26 | 0.543 | 0.409 |
| CHI3L2    | 3 | 0.63357387 | 2.02325E-81 | 3.69183E-77 | 0.77  | 0.567 |
| MT1F      | 3 | 0.6068355  | 5.1513E-99  | 9.39959E-95 | 0.952 | 0.861 |
| RGS16     | 3 | 0.55349928 | 1.35363E-56 | 2.46997E-52 | 0.356 | 0.185 |
| FTH1      | 3 | 0.54950742 | 1.55E-82    | 2.82E-78    | 1     | 1     |
| CHI3L1    | 3 | 0.54245071 | 1.18E-69    | 2.15E-65    | 0.944 | 0.918 |
| SLC39A14  | 3 | 0.53895805 | 1.96E-177   | 3.58E-173   | 0.827 | 0.529 |
| ORM1      | 3 | 0.47440949 | 2.23E-23    | 4.07E-19    | 0.334 | 0.218 |
| CXCL2     | 3 | 0.46416551 | 1.94E-94    | 3.53E-90    | 0.123 | 0.02  |
| BMP2      | 3 | 0.46091826 | 4.58E-78    | 8.37E-74    | 0.433 | 0.213 |
| HMGA1     | 3 | 0.45185235 | 3.65E-71    | 6.66E-67    | 0.603 | 0.368 |
| CD44      | 3 | 0.43933918 | 4.16E-115   | 7.59E-111   | 0.928 | 0.76  |
| PTX3      | 3 | 0.43586925 | 1.71E-165   | 3.12E-161   | 0.249 | 0.049 |
| IL32      | 3 | 0.43193498 | 8.73E-190   | 1.59E-185   | 0.374 | 0.097 |
| CTSL      | 3 | 0.42257873 | 8.63E-39    | 1.57E-34    | 0.7   | 0.562 |
| PRG4      | 3 | 0.3978813  | 1.02E-11    | 1.87E-07    | 0.393 | 0.31  |
| SLC25A37  | 3 | 0.39759585 | 6.71E-91    | 1.22E-86    | 0.906 | 0.739 |
| HILPDA    | 3 | 0.39545925 | 4.09E-33    | 7.46E-29    | 0.577 | 0.446 |
| C11orf96  | 3 | 0.38912957 | 3.36E-57    | 6.14E-53    | 0.391 | 0.203 |
| RGS2      | 3 | 0.38676098 | 7.31E-37    | 1.33E-32    | 0.546 | 0.378 |
| SOD3      | 3 | 0.38648673 | 2.45E-59    | 4.48E-55    | 0.959 | 0.916 |
| TNFRSF11B | 3 | 0.37551323 | 1.05E-10    | 1.91E-06    | 0.642 | 0.596 |
| TFPI2     | 3 | 0.37079515 | 3.09E-30    | 5.64E-26    | 0.124 | 0.049 |
| CLU       | 3 | 0.36224558 | 3.75E-55    | 6.85E-51    | 0.998 | 0.994 |
| PDE4B     | 3 | 0.35158228 | 7.78E-92    | 1.42E-87    | 0.492 | 0.241 |
| TNFAIP6   | 3 | 0.35152827 | 4.13E-47    | 7.54E-43    | 0.18  | 0.069 |
| ZFP36L1   | 3 | 0.34683146 | 3.55E-45    | 6.47E-41    | 0.534 | 0.354 |
| AKR1C2    | 3 | 0.34584111 | 1.04E-75    | 1.89E-71    | 0.343 | 0.149 |
| TYMP      | 3 | 0.34487515 | 1.71E-84    | 3.12E-80    | 0.534 | 0.29  |
| RELB      | 3 | 0.34198775 | 2.00E-105   | 3.65E-101   | 0.491 | 0.222 |

| SERPINA1 | 3       | 0.33905264 | 3.68E-41    | 6.72E-37    | 0.961 | 0.923 |
|----------|---------|------------|-------------|-------------|-------|-------|
| NRP2     | 3       | 0.33668498 | 2.28E-44    | 4.16E-40    | 0.471 | 0.293 |
| PNRC1    | 3       | 0.33148668 | 2.41E-65    | 4.40E-61    | 0.98  | 0.943 |
| FN1      | 3       | 0.32953252 | 1.30E-58    | 2.37E-54    | 0.998 | 0.997 |
| NAMPT    | 3       | 0.32723697 | 2.56E-55    | 4.68E-51    | 0.656 | 0.47  |
| TNFAIP8  | 3       | 0.30755512 | 6.69E-144   | 1.22E-139   | 0.254 | 0.058 |
| ASS1     | 3       | 0.30416213 | 2.65E-64    | 4.83E-60    | 0.565 | 0.354 |
| DEFB1    | 3       | 0.30188342 | 2.73E-56    | 4.99E-52    | 0.308 | 0.143 |
| GSTO1    | 3       | 0.29863321 | 4.82E-53    | 8.79E-49    | 0.791 | 0.653 |
| GADD45A  | 3       | 0.28593966 | 1.29E-18    | 2.36E-14    | 0.456 | 0.353 |
| UPP1     | 3       | 0.28410682 | 1.91E-35    | 3.48E-31    | 0.531 | 0.367 |
| PDPN     | 3       | 0.27829784 | 2.41E-53    | 4.40E-49    | 0.673 | 0.485 |
| BTG1     | 3       | 0.27695744 | 1.01E-39    | 1.84E-35    | 0.98  | 0.948 |
| CEBPD    | 3       | 0.27525052 | 1.91E-33    | 3.48E-29    | 0.854 | 0.761 |
| ICAM1    | 3       | 0.26725478 | 8.39E-53    | 1.53E-48    | 0.363 | 0.191 |
| FNIP2    | 3       | 0.26664276 | 4.83E-56    | 8.82E-52    | 0.442 | 0.249 |
| TM4SF1   | 3       | 0.26515629 | 1.93E-29    | 3.52E-25    | 0.644 | 0.502 |
| SQRDL    | 3       | 0.26304701 | 3.99E-92    | 7.28E-88    | 0.409 | 0.177 |
| MGST1    | 3       | 0.25876149 | 3.81E-30    | 6.96E-26    | 0.418 | 0.28  |
| AKR1C1   | 3       | 0.25809841 | 6.58E-70    | 1.20E-65    | 0.29  | 0.117 |
| RAB13    | 3       | 0.25583832 | 7.25E-49    | 1.32E-44    | 0.904 | 0.821 |
| BIRC3    | 3       | 0.25574767 | 8.23E-138   | 1.50E-133   | 0.213 | 0.042 |
| ORM2     | 3       | 0.25541268 | 1.72E-15    | 3.14E-11    | 0.166 | 0.097 |
| ISG20    | 3       | 0.25488592 | 1.18E-41    | 2.15E-37    | 0.602 | 0.426 |
| TREM1    | 3       | 0.25435389 | 6.05E-40    | 1.10E-35    | 0.337 | 0.186 |
| LPP      | 3       | 0.25049184 | 1.04E-38    | 1.91E-34    | 0.595 | 0.426 |
| gene     | cluster | avg_logFC  | p_val       | p_val_adj   | pct.1 | pct.2 |
| CTGF     | 4       | 1.58128898 | 0           | 0           | 0.917 | 0.419 |
| ID1      | 4       | 0.87020271 | 8.8104E-178 | 1.6076E-173 | 0.891 | 0.581 |
| CYR61    | 4       | 0.87000174 | 4.3551E-246 | 7.9467E-242 | 0.824 | 0.388 |
| COL2A1   | 4       | 0.79178812 | 2.943E-142  | 5.3702E-138 | 0.902 | 0.662 |
| COL11A1  | 4       | 0.75061128 | 1.5774E-171 | 2.8782E-167 | 0.936 | 0.704 |
| THY1     | 4       | 0.69764592 | 1.382E-193  | 2.5218E-189 | 0.798 | 0.399 |
| ID3      | 4       | 0.62530988 | 1.8725E-116 | 3.4168E-112 | 0.848 | 0.55  |
| COL5A2   | 4       | 0.62173156 | 6.8388E-170 | 1.2479E-165 | 0.774 | 0.382 |
| TPM1     | 4       | 0.60806303 | 9.147E-109  | 1.6691E-104 | 0.823 | 0.599 |
| PLPP1    | 4       | 0.60324151 | 1.1455E-171 | 2.0902E-167 | 0.615 | 0.251 |
| SCRG1    | 4       | 0.59422495 | 2.3368E-128 | 4.264E-124  | 0.998 | 0.974 |
| CRYAB    | 4       | 0.58439778 | 7.749E-104  | 1.414E-99   | 0.91  | 0.746 |

|           |   |            |             |             |       |       |
|-----------|---|------------|-------------|-------------|-------|-------|
| FHL1      | 4 | 0.58275177 | 4.518E-119  | 8.2441E-115 | 0.71  | 0.413 |
| DNM3OS    | 4 | 0.56608575 | 7.5568E-158 | 1.3789E-153 | 0.702 | 0.339 |
| TUBB2B    | 4 | 0.54877542 | 5.74018E-70 | 1.04741E-65 | 0.629 | 0.402 |
| TBL1XR1   | 4 | 0.54337376 | 9.0458E-139 | 1.6506E-134 | 0.669 | 0.35  |
| POLR2L    | 4 | 0.52513865 | 1.2409E-174 | 2.2643E-170 | 0.985 | 0.847 |
| LINC01503 | 4 | 0.51740382 | 8.464E-111  | 1.5444E-106 | 0.599 | 0.303 |
| INHBA     | 4 | 0.508776   | 1.9655E-130 | 3.5864E-126 | 0.707 | 0.362 |
| LOX       | 4 | 0.49449279 | 1.5816E-151 | 2.8859E-147 | 0.578 | 0.229 |
| LINC00152 | 4 | 0.48638695 | 3.81994E-79 | 6.97025E-75 | 0.603 | 0.336 |
| SERF2     | 4 | 0.47928412 | 2.1463E-181 | 3.9164E-177 | 1     | 1     |
| ASPN      | 4 | 0.47473956 | 2.64506E-40 | 4.82644E-36 | 0.26  | 0.121 |
| PLAC9     | 4 | 0.47377092 | 9.64172E-97 | 1.75932E-92 | 0.945 | 0.79  |
| OGN       | 4 | 0.47361018 | 7.77557E-94 | 1.41881E-89 | 0.987 | 0.846 |
| CAPS      | 4 | 0.47039227 | 4.15373E-52 | 7.57931E-48 | 0.867 | 0.734 |
| MT-CO3    | 4 | 0.46905232 | 8.1843E-109 | 1.4934E-104 | 0.971 | 0.881 |
| MT-CYB    | 4 | 0.45569602 | 1.51825E-85 | 2.77035E-81 | 0.912 | 0.707 |
| MT-CO1    | 4 | 0.44635357 | 2.17652E-89 | 3.9715E-85  | 0.977 | 0.942 |
| NEAT1     | 4 | 0.44504986 | 1.48351E-84 | 2.70697E-80 | 0.998 | 0.99  |
| MT-CO2    | 4 | 0.44388738 | 2.76366E-85 | 5.04285E-81 | 0.982 | 0.926 |
| ZFP36L1   | 4 | 0.44117437 | 9.91382E-60 | 1.80898E-55 | 0.576 | 0.353 |
| GPX3      | 4 | 0.43869069 | 2.43363E-96 | 4.44064E-92 | 0.99  | 0.924 |
| LSP1      | 4 | 0.43536376 | 5.3464E-100 | 9.75564E-96 | 0.624 | 0.319 |
| PPIC      | 4 | 0.43375475 | 3.6238E-100 | 6.61228E-96 | 0.754 | 0.453 |
| ID4       | 4 | 0.43115588 | 1.81688E-76 | 3.31526E-72 | 0.769 | 0.528 |
| OSBPL9    | 4 | 0.42843828 | 1.04E-121   | 1.8977E-117 | 0.525 | 0.23  |
| VCAN      | 4 | 0.41767743 | 4.32478E-67 | 7.89142E-63 | 0.667 | 0.419 |
| COL3A1    | 4 | 0.41652804 | 9.2355E-126 | 1.6852E-121 | 0.526 | 0.209 |
| MT-ATP6   | 4 | 0.40987296 | 6.78817E-78 | 1.23864E-73 | 0.947 | 0.806 |
| DOK1      | 4 | 0.40875533 | 4.1789E-100 | 7.62532E-96 | 0.435 | 0.177 |
| SLC40A1   | 4 | 0.4068712  | 3.53443E-42 | 6.44927E-38 | 0.462 | 0.273 |
| SAA1      | 4 | 0.40073287 | 1.39086E-28 | 2.5379E-24  | 0.145 | 0.059 |
| MT-ND3    | 4 | 0.39695377 | 1.08439E-73 | 1.97869E-69 | 0.899 | 0.682 |
| CITED2    | 4 | 0.38489483 | 2.64889E-54 | 4.83343E-50 | 0.639 | 0.414 |
| GOLIM4    | 4 | 0.38339131 | 2.51006E-36 | 4.5801E-32  | 0.599 | 0.434 |
| S100A4    | 4 | 0.38116771 | 3.60042E-64 | 6.56968E-60 | 0.899 | 0.764 |
| NNMT      | 4 | 0.37320527 | 1.13037E-81 | 2.06258E-77 | 0.959 | 0.882 |
| CYP1B1    | 4 | 0.37254787 | 7.32361E-37 | 1.33634E-32 | 0.28  | 0.14  |
| TCF4      | 4 | 0.35807884 | 9.6418E-69  | 1.75934E-64 | 0.683 | 0.431 |
| HCFC1R1   | 4 | 0.35326198 | 9.56338E-74 | 1.74503E-69 | 0.857 | 0.657 |

|          |   |            |             |             |       |       |
|----------|---|------------|-------------|-------------|-------|-------|
| COL11A2  | 4 | 0.35101594 | 3.24699E-55 | 5.92478E-51 | 0.686 | 0.487 |
| SPTLC3   | 4 | 0.34890987 | 2.49256E-67 | 4.54818E-63 | 0.413 | 0.194 |
| GAS1     | 4 | 0.34698853 | 2.78302E-84 | 5.07818E-80 | 0.438 | 0.191 |
| MT-ND1   | 4 | 0.34194764 | 3.20393E-63 | 5.84622E-59 | 0.845 | 0.633 |
| CXXC5    | 4 | 0.33942892 | 4.72782E-82 | 8.62685E-78 | 0.605 | 0.332 |
| MAGED1   | 4 | 0.33794923 | 1.73136E-55 | 3.15921E-51 | 0.459 | 0.241 |
| VKORC1   | 4 | 0.33414303 | 3.91996E-77 | 7.15274E-73 | 0.987 | 0.947 |
| NREP     | 4 | 0.33301544 | 5.0379E-102 | 9.19267E-98 | 0.528 | 0.235 |
| DSEL     | 4 | 0.33019583 | 6.05068E-65 | 1.10407E-60 | 0.377 | 0.173 |
| MDFI     | 4 | 0.33017686 | 1.15366E-61 | 2.10508E-57 | 0.729 | 0.489 |
| ENAH     | 4 | 0.3292482  | 2.11771E-75 | 3.86419E-71 | 0.562 | 0.309 |
| SNAI2    | 4 | 0.32367929 | 1.51069E-45 | 2.75656E-41 | 0.695 | 0.493 |
| AEBP1    | 4 | 0.32285777 | 6.70008E-47 | 1.22256E-42 | 0.768 | 0.589 |
| MT-ND4   | 4 | 0.31806521 | 4.9716E-59  | 9.07167E-55 | 0.984 | 0.942 |
| FSTL1    | 4 | 0.31534361 | 1.20422E-64 | 2.19735E-60 | 0.577 | 0.333 |
| TRPS1    | 4 | 0.31519533 | 5.24778E-60 | 9.57562E-56 | 0.668 | 0.44  |
| C7orf73  | 4 | 0.31227847 | 1.60691E-59 | 2.93214E-55 | 0.893 | 0.735 |
| MT-ND2   | 4 | 0.31101644 | 3.29294E-51 | 6.00862E-47 | 0.853 | 0.658 |
| BGN      | 4 | 0.31026426 | 5.57685E-71 | 1.01761E-66 | 1     | 0.983 |
| SDC2     | 4 | 0.3093131  | 1.74083E-49 | 3.17648E-45 | 0.925 | 0.821 |
| IFITM3   | 4 | 0.30844146 | 5.59386E-58 | 1.02071E-53 | 0.943 | 0.865 |
| ACAN     | 4 | 0.30827545 | 8.4116E-52  | 1.53486E-47 | 0.978 | 0.914 |
| SLC38A1  | 4 | 0.30598791 | 8.67708E-79 | 1.58331E-74 | 0.547 | 0.283 |
| ID2      | 4 | 0.29953359 | 1.80947E-30 | 3.30173E-26 | 0.713 | 0.559 |
| TMEM230  | 4 | 0.29877164 | 4.71992E-59 | 8.61244E-55 | 0.86  | 0.7   |
| NGFRAP1  | 4 | 0.29780861 | 1.79975E-57 | 3.284E-53   | 0.923 | 0.837 |
| THBS1    | 4 | 0.29681217 | 1.96773E-74 | 3.59051E-70 | 0.268 | 0.092 |
| SPARC    | 4 | 0.29364709 | 1.01818E-76 | 1.85787E-72 | 0.846 | 0.573 |
| FBXO2    | 4 | 0.29326136 | 8.28897E-38 | 1.51249E-33 | 0.851 | 0.732 |
| RPL3     | 4 | 0.29200474 | 7.307E-134  | 1.3333E-129 | 1     | 1     |
| FXVD6    | 4 | 0.29129162 | 3.76807E-58 | 6.8756E-54  | 0.923 | 0.801 |
| C1orf122 | 4 | 0.29112989 | 7.66101E-62 | 1.39791E-57 | 0.621 | 0.388 |
| ECM2     | 4 | 0.29110865 | 2.09765E-84 | 3.82759E-80 | 0.461 | 0.211 |
| EPYC     | 4 | 0.29061004 | 1.66914E-39 | 3.04567E-35 | 0.314 | 0.159 |
| IFITM2   | 4 | 0.28751395 | 2.69908E-50 | 4.92501E-46 | 0.954 | 0.86  |
| NME4     | 4 | 0.28669776 | 2.82864E-61 | 5.16142E-57 | 0.673 | 0.432 |
| IFITM10  | 4 | 0.28511216 | 1.16125E-73 | 2.11892E-69 | 0.44  | 0.205 |
| RGCC     | 4 | 0.28197323 | 6.67839E-12 | 1.21861E-07 | 0.802 | 0.761 |
| NDUFA4L2 | 4 | 0.28187944 | 3.96994E-96 | 7.24395E-92 | 1     | 0.999 |

| CRIP1       | 4       | 0.28102723 | 1.07248E-29 | 1.95696E-25 | 0.481 | 0.328 |
|-------------|---------|------------|-------------|-------------|-------|-------|
| HIF1A-AS2   | 4       | 0.28101174 | 6.07208E-46 | 1.10797E-41 | 0.398 | 0.22  |
| TTC3        | 4       | 0.28063306 | 1.50416E-52 | 2.74465E-48 | 0.858 | 0.687 |
| PDGFRA      | 4       | 0.27516628 | 2.12494E-72 | 3.87738E-68 | 0.505 | 0.252 |
| AFF3        | 4       | 0.27359432 | 2.36601E-86 | 4.31726E-82 | 0.389 | 0.155 |
| CP          | 4       | 0.27335953 | 9.83288E-28 | 1.79421E-23 | 0.8   | 0.674 |
| MIR4435-2HG | 4       | 0.27093079 | 2.63831E-47 | 4.81412E-43 | 0.411 | 0.22  |
| FMOD        | 4       | 0.27092594 | 1.17976E-55 | 2.15271E-51 | 0.973 | 0.881 |
| CCDC102B    | 4       | 0.27022565 | 2.10404E-52 | 3.83925E-48 | 0.414 | 0.215 |
| ZIC1        | 4       | 0.26858098 | 5.68915E-46 | 1.0381E-41  | 0.391 | 0.211 |
| P3H2        | 4       | 0.26781108 | 5.04169E-47 | 9.19957E-43 | 0.439 | 0.25  |
| MEG3        | 4       | 0.26732739 | 1.57999E-41 | 2.88301E-37 | 0.468 | 0.284 |
| GTF2H5      | 4       | 0.26377577 | 6.27413E-45 | 1.14484E-40 | 0.767 | 0.601 |
| NFIA        | 4       | 0.26360739 | 1.18508E-45 | 2.16242E-41 | 0.548 | 0.35  |
| ISM1        | 4       | 0.26018333 | 1.79575E-75 | 3.27671E-71 | 0.361 | 0.148 |
| OST4        | 4       | 0.25958021 | 8.15363E-84 | 1.48779E-79 | 1     | 0.999 |
| COL1A2      | 4       | 0.25765358 | 3.126E-55   | 5.70402E-51 | 0.488 | 0.265 |
| COPZ2       | 4       | 0.25758213 | 5.87281E-64 | 1.07161E-59 | 0.51  | 0.269 |
| NDUFA11     | 4       | 0.255039   | 3.14921E-51 | 5.74636E-47 | 0.951 | 0.874 |
| PTRF        | 4       | 0.25190765 | 7.0037E-51  | 1.27797E-46 | 0.709 | 0.484 |
| SOX9        | 4       | 0.25177593 | 5.00679E-33 | 9.13589E-29 | 0.807 | 0.655 |
| ATRNL1      | 4       | 0.25027477 | 2.70221E-47 | 4.93073E-43 | 0.454 | 0.257 |
| gene        | cluster | avg_logFC  | p_val       | p_val_adj   | pct.1 | pct.2 |
| FRZB        | 5       | 1.56279282 | 2.8104E-238 | 5.1281E-234 | 0.858 | 0.488 |
| PLA2G2A     | 5       | 1.3097467  | 5.8056E-155 | 1.0593E-150 | 0.707 | 0.38  |
| SLPI        | 5       | 0.83595956 | 1.1088E-103 | 2.0233E-99  | 0.994 | 0.923 |
| CHRD12      | 5       | 0.69490397 | 6.3249E-133 | 1.1541E-128 | 0.506 | 0.195 |
| SPTSSB      | 5       | 0.60214803 | 2.66089E-46 | 4.85533E-42 | 0.508 | 0.318 |
| GREM1       | 5       | 0.54642056 | 8.3913E-68  | 1.53116E-63 | 0.303 | 0.116 |
| CFH         | 5       | 0.50259621 | 2.58536E-37 | 4.71751E-33 | 0.355 | 0.202 |
| CLEC3A      | 5       | 0.46235042 | 1.92511E-41 | 3.51274E-37 | 0.723 | 0.535 |
| C2orf82     | 5       | 0.44634631 | 6.77795E-66 | 1.23677E-61 | 0.99  | 0.95  |
| COL9A3      | 5       | 0.40388391 | 3.54558E-49 | 6.46962E-45 | 0.8   | 0.618 |
| SCRG1       | 5       | 0.39569469 | 3.422E-56   | 6.24412E-52 | 0.996 | 0.974 |
| NOVA1       | 5       | 0.37963473 | 2.31629E-39 | 4.22653E-35 | 0.904 | 0.81  |
| ACAN        | 5       | 0.35851945 | 6.31899E-64 | 1.15303E-59 | 0.979 | 0.914 |
| ORM1        | 5       | 0.34750103 | 1.01735E-16 | 1.85636E-12 | 0.332 | 0.221 |
| SERPINA1    | 5       | 0.33912073 | 1.8478E-59  | 3.37168E-55 | 0.992 | 0.921 |
| CRISPLD1    | 5       | 0.33078318 | 1.58359E-36 | 2.88958E-32 | 0.427 | 0.25  |

| S100B     | 5       | 0.30060849 | 5.22282E-40 | 9.53007E-36 | 0.88  | 0.74  |
|-----------|---------|------------|-------------|-------------|-------|-------|
| FGFBP2    | 5       | 0.29218344 | 1.37427E-34 | 2.50762E-30 | 0.975 | 0.922 |
| PCOLCE2   | 5       | 0.28708951 | 6.27813E-52 | 1.14557E-47 | 0.97  | 0.9   |
| HAPLN1    | 5       | 0.28123126 | 3.78943E-25 | 6.91457E-21 | 0.745 | 0.621 |
| CCDC80    | 5       | 0.27942848 | 1.02515E-33 | 1.8706E-29  | 0.97  | 0.9   |
| BGN       | 5       | 0.27577888 | 1.63212E-50 | 2.97813E-46 | 0.999 | 0.983 |
| RGS2      | 5       | 0.27530539 | 9.57721E-10 | 1.74755E-05 | 0.478 | 0.387 |
| CHI3L2    | 5       | 0.26156108 | 6.68202E-21 | 1.21927E-16 | 0.699 | 0.577 |
| FABP3     | 5       | 0.26023926 | 4.49488E-31 | 8.2018E-27  | 0.412 | 0.258 |
| gene      | cluster | avg_logFC  | p_val       | p_val_adj   | pct.1 | pct.2 |
| MSMP      | 6       | 1.74404499 | 2.28257E-41 | 4.16501E-37 | 0.443 | 0.269 |
| S100A2    | 6       | 1.37933196 | 3.22313E-88 | 5.88124E-84 | 0.705 | 0.458 |
| TNFRSF11B | 6       | 0.97692481 | 5.1169E-106 | 9.3368E-102 | 0.819 | 0.586 |
| FABP5     | 6       | 0.96444394 | 3.01579E-80 | 5.50291E-76 | 0.606 | 0.35  |
| TNFRSF12A | 6       | 0.93137415 | 1.4511E-189 | 2.6478E-185 | 0.798 | 0.392 |
| SERPINE2  | 6       | 0.78731604 | 3.1995E-117 | 5.8381E-113 | 1     | 0.995 |
| IL11      | 6       | 0.77765637 | 3.72576E-97 | 6.7984E-93  | 0.281 | 0.075 |
| CTSL      | 6       | 0.76978959 | 6.13271E-69 | 1.11904E-64 | 0.763 | 0.563 |
| IGFBP3    | 6       | 0.75002368 | 1.05075E-62 | 1.91731E-58 | 0.545 | 0.299 |
| PHLDA1    | 6       | 0.71450323 | 2.17192E-77 | 3.9631E-73  | 0.462 | 0.207 |
| TM4SF1    | 6       | 0.71307171 | 1.49467E-86 | 2.72732E-82 | 0.762 | 0.5   |
| HMGA1     | 6       | 0.6835974  | 3.2904E-102 | 6.00397E-98 | 0.682 | 0.371 |
| MRPS6     | 6       | 0.6835815  | 3.51383E-74 | 6.41168E-70 | 0.963 | 0.909 |
| BMP2      | 6       | 0.6833891  | 4.244E-103  | 7.744E-99   | 0.518 | 0.215 |
| MT2A      | 6       | 0.64304393 | 5.13708E-66 | 9.37364E-62 | 0.999 | 0.996 |
| FOSL1     | 6       | 0.63869997 | 4.61705E-55 | 8.42474E-51 | 0.386 | 0.179 |
| STK17A    | 6       | 0.63849981 | 2.1231E-105 | 3.874E-101  | 0.653 | 0.335 |
| SPP1      | 6       | 0.59212667 | 8.35669E-28 | 1.52485E-23 | 0.586 | 0.411 |
| SERPINE1  | 6       | 0.57759464 | 4.2478E-115 | 7.751E-111  | 0.437 | 0.147 |
| S100A6    | 6       | 0.55603441 | 6.1436E-143 | 1.121E-138  | 1     | 1     |
| SLC5A3    | 6       | 0.54830395 | 3.68966E-65 | 6.73252E-61 | 0.701 | 0.48  |
| PMP22     | 6       | 0.51601792 | 4.3156E-62  | 7.87468E-58 | 0.857 | 0.72  |
| SMOX      | 6       | 0.50733444 | 9.24281E-64 | 1.68654E-59 | 0.554 | 0.307 |
| RGCC      | 6       | 0.50587159 | 7.58671E-53 | 1.38435E-48 | 0.888 | 0.756 |
| CCDC85B   | 6       | 0.49461925 | 4.13831E-45 | 7.55117E-41 | 0.878 | 0.792 |
| CCND1     | 6       | 0.47824632 | 6.99079E-92 | 1.27561E-87 | 0.567 | 0.263 |
| SPRY2     | 6       | 0.47812607 | 2.20291E-93 | 4.01965E-89 | 0.482 | 0.202 |
| NT5E      | 6       | 0.47253627 | 1.7269E-107 | 3.1511E-103 | 0.678 | 0.346 |
| UPP1      | 6       | 0.46555771 | 2.10401E-56 | 3.83918E-52 | 0.606 | 0.368 |



|           |   |            |             |             |       |       |
|-----------|---|------------|-------------|-------------|-------|-------|
| EMP3      | 6 | 0.44585284 | 3.93525E-96 | 7.18065E-92 | 0.975 | 0.869 |
| C11orf96  | 6 | 0.43828435 | 1.22492E-51 | 2.23512E-47 | 0.423 | 0.207 |
| SH3BGRL3  | 6 | 0.43774365 | 2.2793E-110 | 4.1591E-106 | 1     | 0.977 |
| BZW1      | 6 | 0.42402774 | 2.08022E-61 | 3.79577E-57 | 0.81  | 0.611 |
| VEGFA     | 6 | 0.42332293 | 1.60931E-45 | 2.93651E-41 | 0.755 | 0.575 |
| TGFB1     | 6 | 0.42317306 | 1.78413E-20 | 3.25551E-16 | 0.541 | 0.408 |
| KCNMA1    | 6 | 0.41452592 | 3.41248E-25 | 6.22675E-21 | 0.675 | 0.545 |
| BAALC     | 6 | 0.40893467 | 2.16133E-43 | 3.94377E-39 | 0.625 | 0.434 |
| CAV1      | 6 | 0.39726862 | 1.24136E-36 | 2.26511E-32 | 0.842 | 0.722 |
| ISG20     | 6 | 0.3967095  | 1.0359E-59  | 1.8902E-55  | 0.664 | 0.428 |
| LINC00152 | 6 | 0.39452935 | 7.58151E-64 | 1.3834E-59  | 0.603 | 0.341 |
| S100A4    | 6 | 0.39443562 | 5.10676E-21 | 9.3183E-17  | 0.836 | 0.771 |
| NDRG1     | 6 | 0.39115474 | 5.62447E-43 | 1.0263E-38  | 0.696 | 0.51  |
| S100A16   | 6 | 0.38694388 | 6.50491E-53 | 1.18695E-48 | 0.567 | 0.345 |
| ANXA2     | 6 | 0.38196224 | 2.93021E-69 | 5.34676E-65 | 0.941 | 0.85  |
| IER3      | 6 | 0.37928053 | 5.12549E-27 | 9.35248E-23 | 0.417 | 0.255 |
| TMSB10    | 6 | 0.37185209 | 9.19939E-74 | 1.67861E-69 | 0.998 | 0.988 |
| ERRFI1    | 6 | 0.36479589 | 3.51898E-34 | 6.42109E-30 | 0.444 | 0.268 |
| PLAUR     | 6 | 0.36238074 | 2.53151E-48 | 4.61925E-44 | 0.525 | 0.314 |
| EIF4EBP1  | 6 | 0.35937931 | 1.62044E-43 | 2.95682E-39 | 0.723 | 0.529 |
| CTHRC1    | 6 | 0.35123167 | 1.31849E-35 | 2.40584E-31 | 0.459 | 0.269 |
| S100A10   | 6 | 0.33892706 | 4.80637E-60 | 8.77018E-56 | 0.99  | 0.98  |
| SLC20A1   | 6 | 0.33424497 | 5.18941E-54 | 9.46912E-50 | 0.461 | 0.234 |
| S100A11   | 6 | 0.31582563 | 9.95422E-54 | 1.81635E-49 | 0.977 | 0.915 |
| ANXA5     | 6 | 0.31523081 | 5.46451E-47 | 9.9711E-43  | 0.917 | 0.818 |
| GEM       | 6 | 0.3099186  | 8.91905E-31 | 1.62746E-26 | 0.427 | 0.261 |
| AXL       | 6 | 0.30825086 | 3.08531E-34 | 5.62977E-30 | 0.518 | 0.332 |
| ADSS      | 6 | 0.29793022 | 7.97348E-36 | 1.45492E-31 | 0.638 | 0.463 |
| ANGPTL4   | 6 | 0.29681461 | 4.18433E-18 | 7.63514E-14 | 0.33  | 0.215 |
| ARRDC3    | 6 | 0.29666147 | 1.59509E-21 | 2.91057E-17 | 0.52  | 0.382 |
| FHL2      | 6 | 0.29622419 | 8.14414E-60 | 1.48606E-55 | 0.409 | 0.184 |
| CD55      | 6 | 0.29584185 | 3.09013E-25 | 5.63856E-21 | 0.717 | 0.574 |
| RHOC      | 6 | 0.29552676 | 2.80332E-41 | 5.11523E-37 | 0.872 | 0.779 |
| RTN4      | 6 | 0.29522486 | 3.44315E-40 | 6.28272E-36 | 0.8   | 0.63  |
| EPS8      | 6 | 0.29135562 | 3.45312E-44 | 6.30092E-40 | 0.493 | 0.286 |
| PTGS2     | 6 | 0.28237306 | 2.33679E-27 | 4.26395E-23 | 0.509 | 0.326 |
| ERO1A     | 6 | 0.27810001 | 3.51345E-28 | 6.41099E-24 | 0.675 | 0.528 |
| TIMP3     | 6 | 0.27525133 | 7.09216E-11 | 1.29411E-06 | 0.59  | 0.51  |
| BNIP3     | 6 | 0.2749844  | 1.7187E-32  | 3.13611E-28 | 0.993 | 0.992 |

| PPFIBP1     | 6       | 0.27391615 | 6.2043E-32  | 1.1321E-27  | 0.625 | 0.445 |
|-------------|---------|------------|-------------|-------------|-------|-------|
| TNFSF11     | 6       | 0.27369928 | 1.65673E-50 | 3.02304E-46 | 0.224 | 0.077 |
| MGLL        | 6       | 0.26602211 | 5.51483E-52 | 1.00629E-47 | 0.343 | 0.15  |
| SLC16A3     | 6       | 0.26355867 | 3.85555E-21 | 7.03523E-17 | 0.595 | 0.467 |
| HMGA2       | 6       | 0.26207508 | 5.19006E-66 | 9.4703E-62  | 0.352 | 0.135 |
| C10orf10    | 6       | 0.26176018 | 9.39549E-10 | 1.71439E-05 | 0.563 | 0.484 |
| TMSB4X      | 6       | 0.26159748 | 1.35061E-10 | 2.46445E-06 | 0.828 | 0.768 |
| NRN1        | 6       | 0.25691095 | 1.11872E-07 | 0.002041323 | 0.542 | 0.457 |
| ENO2        | 6       | 0.25493247 | 2.78692E-26 | 5.08528E-22 | 0.6   | 0.44  |
| PDLIM4      | 6       | 0.25309299 | 7.41992E-30 | 1.35391E-25 | 0.885 | 0.779 |
| INSIG2      | 6       | 0.25217498 | 5.80728E-20 | 1.05965E-15 | 0.629 | 0.511 |
| SDC4        | 6       | 0.25147989 | 5.09667E-12 | 9.29989E-08 | 0.451 | 0.351 |
| MIR4435-2HG | 6       | 0.25135575 | 6.66795E-41 | 1.2167E-36  | 0.418 | 0.223 |
| gene        | cluster | avg_logFC  | p_val       | p_val_adj   | pct.1 | pct.2 |
| TMSB4X      | 7       | 1.71692251 | 0.00E+00    | 0.00E+00    | 0.992 | 0.759 |
| COL1A2      | 7       | 1.62948271 | 0.00E+00    | 0.00E+00    | 0.872 | 0.248 |
| CYTL1       | 7       | 1.56125071 | 4.38E-168   | 8.00E-164   | 0.559 | 0.181 |
| LGALS1      | 7       | 1.37045979 | 0.00E+00    | 0.00E+00    | 0.999 | 0.972 |
| S100A4      | 7       | 1.32958057 | 6.06E-234   | 1.11E-229   | 0.972 | 0.763 |
| TMSB10      | 7       | 1.30728631 | 7.02E-302   | 1.28E-297   | 1     | 0.988 |
| COL5A2      | 7       | 1.27044713 | 0.00E+00    | 0.00E+00    | 0.933 | 0.382 |
| MSMP        | 7       | 1.25822043 | 2.03E-42    | 3.70E-38    | 0.46  | 0.269 |
| COL1A1      | 7       | 1.23734039 | 0.00E+00    | 0.00E+00    | 0.392 | 0.04  |
| THY1        | 7       | 1.21056595 | 7.28E-281   | 1.33E-276   | 0.917 | 0.401 |
| COL3A1      | 7       | 1.18938001 | 4.94E-308   | 9.01E-304   | 0.752 | 0.204 |
| CTGF        | 7       | 1.14900802 | 1.93E-94    | 3.53E-90    | 0.735 | 0.441 |
| ARPC1B      | 7       | 1.11938994 | 2.82E-265   | 5.15E-261   | 0.898 | 0.455 |
| SERF2       | 7       | 1.10153954 | 0.00E+00    | 0.00E+00    | 1     | 1     |
| PRSS23      | 7       | 1.04516338 | 1.85E-217   | 3.38E-213   | 0.785 | 0.323 |
| COL6A3      | 7       | 1.04000462 | 0.00E+00    | 0.00E+00    | 0.887 | 0.32  |
| SH3BGRL3    | 7       | 1.02465919 | 3.89E-233   | 7.10E-229   | 0.997 | 0.977 |
| LSP1        | 7       | 1.00977371 | 0.00E+00    | 0.00E+00    | 0.883 | 0.312 |
| POLR2L      | 7       | 0.99462212 | 2.27E-231   | 4.15E-227   | 0.981 | 0.85  |
| VIM         | 7       | 0.97771895 | 9.09E-90    | 1.66E-85    | 1     | 0.999 |
| COL6A1      | 7       | 0.95995546 | 7.85E-286   | 1.43E-281   | 0.931 | 0.452 |
| CRIP1       | 7       | 0.95243343 | 4.27E-222   | 7.78E-218   | 0.786 | 0.314 |
| SPARC       | 7       | 0.95232965 | 8.37E-238   | 1.53E-233   | 0.954 | 0.573 |
| TPM1        | 7       | 0.94611225 | 6.40E-164   | 1.17E-159   | 0.9   | 0.599 |
| S100A10     | 7       | 0.91090984 | 1.42E-210   | 2.58E-206   | 0.996 | 0.979 |

|          |   |            |           |           |       |       |
|----------|---|------------|-----------|-----------|-------|-------|
| COL2A1   | 7 | 0.892317   | 2.51E-45  | 4.57E-41  | 0.779 | 0.675 |
| MT-CYB   | 7 | 0.89114049 | 1.52E-161 | 2.77E-157 | 0.935 | 0.71  |
| IGFBP5   | 7 | 0.87814464 | 7.70E-66  | 1.41E-61  | 0.413 | 0.176 |
| PTMS     | 7 | 0.87797836 | 1.28E-171 | 2.34E-167 | 0.929 | 0.655 |
| C12orf75 | 7 | 0.87616936 | 0.00E+00  | 0.00E+00  | 0.661 | 0.146 |
| ID1      | 7 | 0.86170303 | 4.62E-108 | 8.43E-104 | 0.876 | 0.589 |
| ITGB1    | 7 | 0.85955912 | 1.75E-254 | 3.20E-250 | 0.934 | 0.499 |
| MYDGF    | 7 | 0.844447   | 5.19E-205 | 9.48E-201 | 0.966 | 0.767 |
| ID3      | 7 | 0.84001015 | 2.58E-112 | 4.71E-108 | 0.856 | 0.557 |
| MT-CO3   | 7 | 0.835577   | 4.86E-177 | 8.88E-173 | 0.974 | 0.883 |
| C1orf122 | 7 | 0.83225806 | 9.78E-245 | 1.79E-240 | 0.851 | 0.38  |
| PPP1R14B | 7 | 0.82060996 | 1.85E-279 | 3.37E-275 | 0.682 | 0.182 |
| CFL1     | 7 | 0.81730627 | 2.04E-172 | 3.73E-168 | 0.952 | 0.763 |
| CYR61    | 7 | 0.81071065 | 4.49E-98  | 8.19E-94  | 0.72  | 0.404 |
| COL5A1   | 7 | 0.80011052 | 0.00E+00  | 0.00E+00  | 0.775 | 0.15  |
| MT-CO1   | 7 | 0.78179259 | 4.02E-154 | 7.33E-150 | 0.985 | 0.942 |
| CTHRC1   | 7 | 0.781521   | 2.57E-102 | 4.69E-98  | 0.599 | 0.262 |
| CKAP4    | 7 | 0.77713109 | 6.95E-234 | 1.27E-229 | 0.762 | 0.292 |
| PRKCDBP  | 7 | 0.77434464 | 3.69E-180 | 6.74E-176 | 0.847 | 0.466 |
| PFN1     | 7 | 0.77378835 | 5.66E-167 | 1.03E-162 | 0.987 | 0.873 |
| CYP1B1   | 7 | 0.74883037 | 6.39E-68  | 1.17E-63  | 0.359 | 0.139 |
| HCFC1R1  | 7 | 0.74415488 | 1.49E-150 | 2.72E-146 | 0.927 | 0.657 |
| S100A11  | 7 | 0.73842814 | 4.95E-202 | 9.03E-198 | 0.995 | 0.914 |
| FKBP1A   | 7 | 0.73749276 | 1.29E-218 | 2.36E-214 | 0.899 | 0.472 |
| MT-ND1   | 7 | 0.73584098 | 5.51E-141 | 1.00E-136 | 0.918 | 0.633 |
| MT-ATP6  | 7 | 0.7350504  | 2.28E-145 | 4.16E-141 | 0.966 | 0.808 |
| PPIC     | 7 | 0.72805363 | 1.30E-185 | 2.37E-181 | 0.879 | 0.453 |
| TPM4     | 7 | 0.72229633 | 4.37E-249 | 7.98E-245 | 0.77  | 0.263 |
| COL11A1  | 7 | 0.71983295 | 5.13E-108 | 9.35E-104 | 0.925 | 0.71  |
| NREP     | 7 | 0.71543571 | 6.59E-229 | 1.20E-224 | 0.712 | 0.232 |
| C9orf3   | 7 | 0.70488454 | 3.85E-174 | 7.02E-170 | 0.799 | 0.382 |
| KCNMA1   | 7 | 0.6976959  | 2.60E-29  | 4.74E-25  | 0.696 | 0.544 |
| IGFBP3   | 7 | 0.69646059 | 3.38E-69  | 6.16E-65  | 0.592 | 0.298 |
| CALR     | 7 | 0.69566472 | 2.73E-137 | 4.98E-133 | 0.921 | 0.657 |
| C4orf48  | 7 | 0.69264091 | 2.95E-190 | 5.38E-186 | 0.798 | 0.344 |
| FSTL1    | 7 | 0.68434431 | 3.12E-223 | 5.69E-219 | 0.812 | 0.325 |
| MALL     | 7 | 0.67508667 | 9.38E-182 | 1.71E-177 | 0.684 | 0.253 |
| TNC      | 7 | 0.67408957 | 0.00E+00  | 0.00E+00  | 0.517 | 0.069 |
| SEC61B   | 7 | 0.67123014 | 1.12E-147 | 2.04E-143 | 0.95  | 0.809 |

|          |   |            |           |           |       |       |
|----------|---|------------|-----------|-----------|-------|-------|
| SRM      | 7 | 0.6634503  | 2.18E-158 | 3.97E-154 | 0.756 | 0.351 |
| LOX      | 7 | 0.66134922 | 3.11E-232 | 5.68E-228 | 0.738 | 0.228 |
| OAZ1     | 7 | 0.65731567 | 4.50E-216 | 8.21E-212 | 1     | 0.997 |
| EIF5A    | 7 | 0.65346457 | 2.39E-126 | 4.37E-122 | 0.847 | 0.55  |
| CALU     | 7 | 0.64493038 | 1.51E-165 | 2.75E-161 | 0.913 | 0.566 |
| AXL      | 7 | 0.64471068 | 1.65E-128 | 3.01E-124 | 0.7   | 0.323 |
| C7orf73  | 7 | 0.63472702 | 1.56E-160 | 2.84E-156 | 0.95  | 0.736 |
| RRBP1    | 7 | 0.63205208 | 1.09E-167 | 1.98E-163 | 0.809 | 0.397 |
| GUK1     | 7 | 0.63005442 | 1.32E-161 | 2.41E-157 | 0.989 | 0.88  |
| OSTC     | 7 | 0.62969983 | 8.08E-171 | 1.47E-166 | 0.98  | 0.8   |
| METRNL   | 7 | 0.62714618 | 7.43E-228 | 1.36E-223 | 0.624 | 0.175 |
| MEG3     | 7 | 0.6234493  | 8.02E-99  | 1.46E-94  | 0.59  | 0.281 |
| MT-CO2   | 7 | 0.62268439 | 8.14E-112 | 1.48E-107 | 0.983 | 0.927 |
| SCD      | 7 | 0.61512662 | 1.16E-190 | 2.11E-186 | 0.528 | 0.142 |
| PDGFRA   | 7 | 0.61386216 | 2.15E-205 | 3.93E-201 | 0.716 | 0.246 |
| OAF      | 7 | 0.61385302 | 5.45E-172 | 9.95E-168 | 0.674 | 0.252 |
| DOK1     | 7 | 0.61358442 | 5.10E-130 | 9.30E-126 | 0.515 | 0.178 |
| MYL6     | 7 | 0.61290549 | 1.95E-138 | 3.56E-134 | 0.988 | 0.927 |
| CLEC11A  | 7 | 0.61148395 | 1.23E-155 | 2.24E-151 | 0.829 | 0.432 |
| OST4     | 7 | 0.60987523 | 2.61E-212 | 4.77E-208 | 0.997 | 0.999 |
| TGFBI    | 7 | 0.60502439 | 4.65E-54  | 8.48E-50  | 0.65  | 0.402 |
| TTC3     | 7 | 0.60362079 | 2.57E-130 | 4.69E-126 | 0.921 | 0.687 |
| CD151    | 7 | 0.59955377 | 9.82E-129 | 1.79E-124 | 0.813 | 0.471 |
| PART1    | 7 | 0.5975284  | 1.77E-230 | 3.24E-226 | 0.499 | 0.107 |
| SERPINH1 | 7 | 0.5931522  | 2.76E-261 | 5.03E-257 | 0.587 | 0.134 |
| DSTN     | 7 | 0.59256689 | 8.36E-174 | 1.53E-169 | 1     | 0.997 |
| YBX1     | 7 | 0.59236192 | 7.69E-154 | 1.40E-149 | 0.989 | 0.981 |
| TPM2     | 7 | 0.59014026 | 3.02E-123 | 5.51E-119 | 0.878 | 0.555 |
| DYNLL1   | 7 | 0.58695517 | 1.05E-113 | 1.91E-109 | 0.961 | 0.842 |
| HMGNL    | 7 | 0.58482522 | 9.38E-125 | 1.71E-120 | 0.965 | 0.827 |
| COPZ2    | 7 | 0.57934811 | 1.95E-186 | 3.56E-182 | 0.704 | 0.263 |
| LOXL1    | 7 | 0.5722075  | 0.00E+00  | 0.00E+00  | 0.462 | 0.051 |
| TMED9    | 7 | 0.55575415 | 3.17E-110 | 5.79E-106 | 0.878 | 0.61  |
| MT-ND2   | 7 | 0.55522063 | 9.17E-93  | 1.67E-88  | 0.904 | 0.66  |
| SNAI2    | 7 | 0.55111015 | 5.98E-88  | 1.09E-83  | 0.803 | 0.491 |
| ENPP1    | 7 | 0.55070907 | 2.54E-69  | 4.63E-65  | 0.584 | 0.303 |
| INSIG1   | 7 | 0.54846399 | 3.02E-74  | 5.52E-70  | 0.692 | 0.406 |
| WWTR1    | 7 | 0.54780577 | 2.13E-147 | 3.88E-143 | 0.716 | 0.324 |
| PPIB     | 7 | 0.54774567 | 1.20E-97  | 2.19E-93  | 0.974 | 0.892 |

|             |   |            |           |           |       |       |
|-------------|---|------------|-----------|-----------|-------|-------|
| EFEMP2      | 7 | 0.54737537 | 3.17E-153 | 5.78E-149 | 0.821 | 0.403 |
| VCAN        | 7 | 0.54731232 | 1.89E-96  | 3.46E-92  | 0.767 | 0.419 |
| MT-ND4      | 7 | 0.54397127 | 1.15E-115 | 2.09E-111 | 0.983 | 0.943 |
| MYEOV2      | 7 | 0.54109535 | 2.14E-132 | 3.91E-128 | 0.937 | 0.706 |
| MDFI        | 7 | 0.53856564 | 1.87E-103 | 3.41E-99  | 0.818 | 0.49  |
| ATP5E       | 7 | 0.53267948 | 1.57E-178 | 2.86E-174 | 0.999 | 0.996 |
| TMED3       | 7 | 0.53130378 | 1.74E-123 | 3.17E-119 | 0.833 | 0.481 |
| PTRF        | 7 | 0.5302236  | 1.47E-115 | 2.69E-111 | 0.832 | 0.482 |
| NT5E        | 7 | 0.5287153  | 3.46E-122 | 6.32E-118 | 0.721 | 0.346 |
| CNPY2       | 7 | 0.52712229 | 5.21E-103 | 9.50E-99  | 0.869 | 0.632 |
| CALD1       | 7 | 0.52425519 | 1.34E-113 | 2.44E-109 | 0.879 | 0.546 |
| UQCRQ       | 7 | 0.52359693 | 1.57E-116 | 2.87E-112 | 0.98  | 0.918 |
| ATP5J2      | 7 | 0.52299036 | 3.96E-121 | 7.22E-117 | 0.86  | 0.524 |
| DNM3OS      | 7 | 0.52033966 | 2.93E-119 | 5.35E-115 | 0.731 | 0.345 |
| LMAN1       | 7 | 0.51927522 | 1.69E-152 | 3.09E-148 | 0.735 | 0.325 |
| DBI         | 7 | 0.51392711 | 2.97E-98  | 5.43E-94  | 0.917 | 0.728 |
| RBX1        | 7 | 0.51235943 | 3.19E-115 | 5.82E-111 | 0.865 | 0.559 |
| COL6A2      | 7 | 0.51125008 | 1.96E-89  | 3.58E-85  | 0.884 | 0.604 |
| PHLDA2      | 7 | 0.50777156 | 1.26E-87  | 2.30E-83  | 0.42  | 0.155 |
| PGF         | 7 | 0.50625085 | 1.43E-125 | 2.61E-121 | 0.245 | 0.043 |
| S100A16     | 7 | 0.50502209 | 9.05E-95  | 1.65E-90  | 0.669 | 0.34  |
| IFITM10     | 7 | 0.50341781 | 6.72E-168 | 1.23E-163 | 0.611 | 0.2   |
| LY6E        | 7 | 0.50250371 | 5.38E-101 | 9.82E-97  | 0.783 | 0.456 |
| IGFBP4      | 7 | 0.50064185 | 2.34E-136 | 4.27E-132 | 0.437 | 0.123 |
| FBN1        | 7 | 0.4980677  | 5.39E-215 | 9.84E-211 | 0.528 | 0.125 |
| NME4        | 7 | 0.49783307 | 2.13E-109 | 3.90E-105 | 0.771 | 0.432 |
| SEP15       | 7 | 0.49772403 | 1.71E-142 | 3.11E-138 | 0.813 | 0.419 |
| PRRX1       | 7 | 0.4972137  | 1.95E-139 | 3.55E-135 | 0.556 | 0.192 |
| AHNAK       | 7 | 0.49537996 | 2.86E-105 | 5.23E-101 | 0.793 | 0.461 |
| LINC00152   | 7 | 0.49433113 | 1.76E-93  | 3.21E-89  | 0.67  | 0.338 |
| MIR4435-2HG | 7 | 0.49426897 | 4.98E-139 | 9.09E-135 | 0.59  | 0.214 |
| TUBA1B      | 7 | 0.49421581 | 5.73E-38  | 1.04E-33  | 0.542 | 0.342 |
| PDLIM2      | 7 | 0.49331139 | 1.30E-107 | 2.37E-103 | 0.82  | 0.495 |
| CXXC5       | 7 | 0.49189226 | 4.34E-117 | 7.92E-113 | 0.711 | 0.332 |
| TMED2       | 7 | 0.49026147 | 5.43E-109 | 9.92E-105 | 0.966 | 0.818 |
| CD99        | 7 | 0.48422441 | 9.52E-121 | 1.74E-116 | 0.989 | 0.922 |
| CRIP2       | 7 | 0.48136719 | 3.40E-82  | 6.20E-78  | 0.711 | 0.412 |
| MT-ND3      | 7 | 0.47931787 | 1.46E-83  | 2.67E-79  | 0.938 | 0.685 |
| LMNA        | 7 | 0.47905963 | 1.11E-132 | 2.02E-128 | 0.694 | 0.302 |

|             |   |            |           |           |       |       |
|-------------|---|------------|-----------|-----------|-------|-------|
| FOXP1       | 7 | 0.47820414 | 5.34E-114 | 9.74E-110 | 0.595 | 0.252 |
| BCL7C       | 7 | 0.47593426 | 3.02E-132 | 5.51E-128 | 0.639 | 0.269 |
| KDELR3      | 7 | 0.472774   | 1.16E-147 | 2.12E-143 | 0.672 | 0.26  |
| TMEM167A    | 7 | 0.4723614  | 1.23E-99  | 2.25E-95  | 0.907 | 0.695 |
| DRAP1       | 7 | 0.47228638 | 7.17E-90  | 1.31E-85  | 0.849 | 0.576 |
| CRELD2      | 7 | 0.47204106 | 2.77E-137 | 5.05E-133 | 0.579 | 0.211 |
| SAT1        | 7 | 0.46893941 | 4.01E-20  | 7.32E-16  | 0.964 | 0.943 |
| VKORC1      | 7 | 0.46580019 | 3.47E-100 | 6.34E-96  | 0.997 | 0.947 |
| ATP5G1      | 7 | 0.4657166  | 1.67E-106 | 3.05E-102 | 0.75  | 0.413 |
| ATP1B1      | 7 | 0.46396027 | 3.36E-112 | 6.13E-108 | 0.451 | 0.149 |
| NME1        | 7 | 0.46162774 | 4.07E-104 | 7.42E-100 | 0.585 | 0.259 |
| FKBP10      | 7 | 0.4611951  | 1.74E-98  | 3.18E-94  | 0.798 | 0.461 |
| HDLBP       | 7 | 0.45984282 | 4.79E-108 | 8.74E-104 | 0.82  | 0.48  |
| FAM114A1    | 7 | 0.45960667 | 2.04E-122 | 3.72E-118 | 0.684 | 0.32  |
| AP2S1       | 7 | 0.45950323 | 4.91E-87  | 8.96E-83  | 0.81  | 0.524 |
| ITGA11      | 7 | 0.4575459  | 1.42E-179 | 2.58E-175 | 0.462 | 0.112 |
| HMGN3       | 7 | 0.45658819 | 3.25E-100 | 5.93E-96  | 0.736 | 0.398 |
| HEBP2       | 7 | 0.45540649 | 1.11E-81  | 2.02E-77  | 0.767 | 0.497 |
| DAP         | 7 | 0.45216953 | 1.86E-104 | 3.39E-100 | 0.793 | 0.467 |
| ANXA2       | 7 | 0.45154618 | 9.00E-88  | 1.64E-83  | 0.957 | 0.849 |
| NEDD8       | 7 | 0.44824117 | 8.95E-95  | 1.63E-90  | 0.904 | 0.71  |
| RP11-14N7.2 | 7 | 0.44792188 | 1.96E-182 | 3.58E-178 | 0.557 | 0.158 |
| SOX4        | 7 | 0.44786703 | 3.15E-104 | 5.74E-100 | 0.306 | 0.077 |
| ZFP36L1     | 7 | 0.44688624 | 2.40E-52  | 4.38E-48  | 0.603 | 0.357 |
| EIF4EBP1    | 7 | 0.44594144 | 5.05E-72  | 9.21E-68  | 0.801 | 0.526 |
| LINC01420   | 7 | 0.44315744 | 4.04E-92  | 7.37E-88  | 0.809 | 0.539 |
| CD59        | 7 | 0.44242086 | 2.24E-95  | 4.09E-91  | 0.987 | 0.938 |
| GNAS        | 7 | 0.44171764 | 1.04E-94  | 1.89E-90  | 0.876 | 0.611 |
| NEAT1       | 7 | 0.43910684 | 2.26E-46  | 4.12E-42  | 1     | 0.99  |
| POSTN       | 7 | 0.43902464 | 1.54E-68  | 2.82E-64  | 0.143 | 0.026 |
| KDELR2      | 7 | 0.4384529  | 1.25E-92  | 2.28E-88  | 0.966 | 0.853 |
| LOXL2       | 7 | 0.43630668 | 6.30E-290 | 1.15E-285 | 0.507 | 0.085 |
| TBL1XR1     | 7 | 0.43597544 | 1.24E-71  | 2.27E-67  | 0.649 | 0.358 |
| NDUFA4L2    | 7 | 0.43476963 | 7.52E-103 | 1.37E-98  | 0.996 | 0.999 |
| CRNDE       | 7 | 0.43357928 | 9.16E-158 | 1.67E-153 | 0.596 | 0.199 |
| TXN         | 7 | 0.43317428 | 2.52E-81  | 4.60E-77  | 0.969 | 0.84  |
| H3F3A       | 7 | 0.43135476 | 3.75E-113 | 6.85E-109 | 0.997 | 0.957 |
| SRSF2       | 7 | 0.43112441 | 1.23E-96  | 2.24E-92  | 0.739 | 0.403 |
| PYCR1       | 7 | 0.42646733 | 3.95E-185 | 7.21E-181 | 0.52  | 0.135 |

|          |   |            |           |           |       |       |
|----------|---|------------|-----------|-----------|-------|-------|
| KIAA0101 | 7 | 0.42610245 | 1.03E-125 | 1.87E-121 | 0.264 | 0.049 |
| NOP10    | 7 | 0.4259789  | 1.49E-93  | 2.71E-89  | 0.952 | 0.753 |
| CAPNS1   | 7 | 0.42536214 | 5.23E-138 | 9.55E-134 | 0.6   | 0.224 |
| TIMM8B   | 7 | 0.42394038 | 9.31E-86  | 1.70E-81  | 0.759 | 0.465 |
| PTTG1IP  | 7 | 0.42393659 | 5.92E-82  | 1.08E-77  | 0.77  | 0.458 |
| ERLEC1   | 7 | 0.42346873 | 4.40E-84  | 8.03E-80  | 0.734 | 0.432 |
| GTF3A    | 7 | 0.4234111  | 6.42E-86  | 1.17E-81  | 0.682 | 0.387 |
| WBP5     | 7 | 0.42303519 | 1.24E-82  | 2.26E-78  | 0.925 | 0.737 |
| NT5DC2   | 7 | 0.42147129 | 5.84E-190 | 1.07E-185 | 0.474 | 0.111 |
| IDI1     | 7 | 0.42084635 | 1.32E-83  | 2.41E-79  | 0.585 | 0.281 |
| GPC6     | 7 | 0.41937593 | 3.60E-112 | 6.56E-108 | 0.629 | 0.276 |
| RBM3     | 7 | 0.41934594 | 7.64E-79  | 1.39E-74  | 0.795 | 0.524 |
| SSR1     | 7 | 0.41863834 | 7.30E-89  | 1.33E-84  | 0.806 | 0.504 |
| ZNHIT1   | 7 | 0.41805718 | 5.67E-89  | 1.03E-84  | 0.833 | 0.549 |
| MARCKS   | 7 | 0.41771925 | 6.15E-99  | 1.12E-94  | 0.37  | 0.114 |
| NFIC     | 7 | 0.41629344 | 1.01E-83  | 1.85E-79  | 0.723 | 0.416 |
| NAV1     | 7 | 0.41477446 | 4.42E-186 | 8.06E-182 | 0.495 | 0.123 |
| MAP1B    | 7 | 0.41427401 | 2.13E-143 | 3.89E-139 | 0.41  | 0.105 |
| P4HA1    | 7 | 0.41413627 | 5.99E-69  | 1.09E-64  | 0.872 | 0.652 |
| ENG      | 7 | 0.41406214 | 9.37E-285 | 1.71E-280 | 0.49  | 0.081 |
| ADIRF    | 7 | 0.41213701 | 8.49E-13  | 1.55E-08  | 0.661 | 0.576 |
| LMO4     | 7 | 0.41207885 | 4.45E-91  | 8.13E-87  | 0.599 | 0.277 |
| LOXL3    | 7 | 0.40963682 | 6.58E-164 | 1.20E-159 | 0.491 | 0.131 |
| ARPC5    | 7 | 0.40773152 | 6.67E-83  | 1.22E-78  | 0.824 | 0.54  |
| GNG11    | 7 | 0.40693443 | 5.63E-83  | 1.03E-78  | 0.556 | 0.26  |
| RTN4     | 7 | 0.40633733 | 3.21E-83  | 5.85E-79  | 0.899 | 0.626 |
| S100A6   | 7 | 0.4035507  | 7.36E-69  | 1.34E-64  | 1     | 1     |
| SMIM14   | 7 | 0.40217162 | 3.88E-96  | 7.07E-92  | 0.677 | 0.337 |
| GANAB    | 7 | 0.39955285 | 1.92E-123 | 3.50E-119 | 0.645 | 0.268 |
| MGLL     | 7 | 0.39764864 | 1.04E-111 | 1.89E-107 | 0.448 | 0.145 |
| COX20    | 7 | 0.39747396 | 1.19E-70  | 2.17E-66  | 0.853 | 0.626 |
| SCX      | 7 | 0.39624733 | 2.34E-133 | 4.28E-129 | 0.277 | 0.053 |
| SLC9A3R2 | 7 | 0.3943982  | 1.21E-53  | 2.21E-49  | 0.529 | 0.292 |
| GNAI2    | 7 | 0.39418002 | 1.77E-107 | 3.23E-103 | 0.634 | 0.285 |
| DAB2     | 7 | 0.39361681 | 4.04E-58  | 7.38E-54  | 0.639 | 0.384 |
| KRT10    | 7 | 0.39323652 | 7.96E-73  | 1.45E-68  | 0.931 | 0.825 |
| FSCN1    | 7 | 0.39308189 | 4.65E-176 | 8.48E-172 | 0.526 | 0.142 |
| CD81     | 7 | 0.39302105 | 2.45E-99  | 4.47E-95  | 0.642 | 0.303 |
| CCND1    | 7 | 0.39125025 | 6.74E-41  | 1.23E-36  | 0.486 | 0.27  |

|           |   |            |           |           |       |       |
|-----------|---|------------|-----------|-----------|-------|-------|
| HMGB1     | 7 | 0.3908907  | 4.13E-50  | 7.54E-46  | 0.894 | 0.759 |
| DYNLT1    | 7 | 0.38988598 | 4.56E-81  | 8.32E-77  | 0.766 | 0.475 |
| B4GALT1   | 7 | 0.38966968 | 3.30E-81  | 6.03E-77  | 0.33  | 0.106 |
| P3H4      | 7 | 0.38859413 | 1.11E-144 | 2.03E-140 | 0.526 | 0.165 |
| EIF4G2    | 7 | 0.38677606 | 2.83E-78  | 5.16E-74  | 0.833 | 0.565 |
| PTN       | 7 | 0.38648463 | 0.00E+00  | 0.00E+00  | 0.363 | 0.034 |
| MMP24-AS1 | 7 | 0.3853893  | 4.26E-65  | 7.78E-61  | 0.756 | 0.522 |
| NDUFB2    | 7 | 0.38533939 | 2.94E-68  | 5.36E-64  | 0.906 | 0.764 |
| NFIX      | 7 | 0.3843497  | 1.45E-109 | 2.64E-105 | 0.557 | 0.222 |
| SEP       | 7 | 0.38357585 | 1.82E-148 | 3.32E-144 | 0.49  | 0.142 |
| ID2       | 7 | 0.38331468 | 1.54E-37  | 2.82E-33  | 0.763 | 0.559 |
| SHC1      | 7 | 0.38327875 | 1.91E-144 | 3.49E-140 | 0.49  | 0.147 |
| GREM1     | 7 | 0.38264543 | 2.38E-13  | 4.35E-09  | 0.213 | 0.124 |
| LIMCH1    | 7 | 0.38225983 | 2.02E-111 | 3.69E-107 | 0.4   | 0.122 |
| TMA7      | 7 | 0.38084849 | 1.99E-103 | 3.63E-99  | 0.997 | 0.988 |
| TCEB2     | 7 | 0.38038316 | 2.10E-105 | 3.83E-101 | 0.995 | 0.967 |
| TNFRSF12A | 7 | 0.38001477 | 1.13E-54  | 2.07E-50  | 0.68  | 0.401 |
| ADAMTS6   | 7 | 0.37991935 | 3.47E-68  | 6.33E-64  | 0.382 | 0.15  |
| LINC00998 | 7 | 0.37970189 | 2.86E-79  | 5.21E-75  | 0.618 | 0.322 |
| HMG2      | 7 | 0.3794301  | 7.19E-36  | 1.31E-31  | 0.929 | 0.895 |
| ATP5G3    | 7 | 0.37791665 | 4.21E-60  | 7.68E-56  | 0.872 | 0.68  |
| ITM2C     | 7 | 0.37740577 | 1.96E-46  | 3.58E-42  | 0.767 | 0.542 |
| GOLIM4    | 7 | 0.37415561 | 3.42E-37  | 6.24E-33  | 0.653 | 0.435 |
| FAM127A   | 7 | 0.37361678 | 5.97E-109 | 1.09E-104 | 0.592 | 0.249 |
| TRAPPC1   | 7 | 0.37249875 | 6.18E-67  | 1.13E-62  | 0.708 | 0.441 |
| MLEC      | 7 | 0.37209937 | 2.72E-72  | 4.96E-68  | 0.672 | 0.389 |
| HMOX1     | 7 | 0.37196614 | 7.07E-35  | 1.29E-30  | 0.355 | 0.184 |
| GPX8      | 7 | 0.37159805 | 2.32E-91  | 4.23E-87  | 0.604 | 0.281 |
| KCNQ1OT1  | 7 | 0.37158611 | 1.08E-105 | 1.98E-101 | 0.443 | 0.149 |
| DKK3      | 7 | 0.37157962 | 9.30E-130 | 1.70E-125 | 0.495 | 0.156 |
| MORF4L2   | 7 | 0.37153232 | 3.39E-72  | 6.19E-68  | 0.865 | 0.641 |
| TMEM230   | 7 | 0.3715228  | 7.47E-73  | 1.36E-68  | 0.908 | 0.7   |
| H2AFV     | 7 | 0.37132707 | 6.50E-52  | 1.19E-47  | 0.732 | 0.499 |
| NAA38     | 7 | 0.37046146 | 3.51E-62  | 6.40E-58  | 0.853 | 0.64  |
| SQLE      | 7 | 0.36934571 | 1.44E-93  | 2.64E-89  | 0.495 | 0.195 |
| SIX1      | 7 | 0.36858491 | 3.03E-91  | 5.53E-87  | 0.419 | 0.147 |
| COL14A1   | 7 | 0.36753251 | 1.57E-97  | 2.86E-93  | 0.283 | 0.07  |
| LSM7      | 7 | 0.36586242 | 1.02E-72  | 1.87E-68  | 0.771 | 0.496 |
| HSPB6     | 7 | 0.36469223 | 1.36E-95  | 2.48E-91  | 0.435 | 0.154 |



|          |   |            |           |           |       |       |
|----------|---|------------|-----------|-----------|-------|-------|
| PLOD1    | 7 | 0.36449517 | 2.11E-85  | 3.84E-81  | 0.694 | 0.376 |
| RCN2     | 7 | 0.36435539 | 1.55E-67  | 2.82E-63  | 0.871 | 0.636 |
| CRLF1    | 7 | 0.36380338 | 8.16E-69  | 1.49E-64  | 0.538 | 0.261 |
| COL8A1   | 7 | 0.3622733  | 7.43E-117 | 1.36E-112 | 0.273 | 0.057 |
| C11orf24 | 7 | 0.36078256 | 3.23E-160 | 5.89E-156 | 0.45  | 0.114 |
| YIF1A    | 7 | 0.36028598 | 3.71E-65  | 6.77E-61  | 0.688 | 0.422 |
| P3H2     | 7 | 0.35747198 | 3.86E-60  | 7.04E-56  | 0.498 | 0.251 |
| SNF8     | 7 | 0.35704296 | 5.22E-67  | 9.53E-63  | 0.653 | 0.374 |
| SPATS2L  | 7 | 0.35679621 | 3.10E-72  | 5.66E-68  | 0.721 | 0.428 |
| ARPC2    | 7 | 0.35577835 | 1.09E-44  | 1.99E-40  | 0.882 | 0.79  |
| BEND6    | 7 | 0.3556982  | 4.48E-217 | 8.18E-213 | 0.45  | 0.087 |
| MTDH     | 7 | 0.35564096 | 4.66E-58  | 8.51E-54  | 0.849 | 0.642 |
| CDK2AP2  | 7 | 0.35552265 | 5.71E-75  | 1.04E-70  | 0.567 | 0.275 |
| HAPLN1   | 7 | 0.35547594 | 2.43E-19  | 4.43E-15  | 0.725 | 0.624 |
| PRR7     | 7 | 0.3552025  | 1.53E-96  | 2.79E-92  | 0.478 | 0.182 |
| EI24     | 7 | 0.35408592 | 2.38E-69  | 4.35E-65  | 0.661 | 0.381 |
| SSR2     | 7 | 0.35375106 | 1.08E-63  | 1.97E-59  | 0.948 | 0.844 |
| MRPL52   | 7 | 0.35352385 | 8.86E-69  | 1.62E-64  | 0.774 | 0.496 |
| RPSA     | 7 | 0.35314171 | 1.22E-78  | 2.23E-74  | 1     | 0.999 |
| ENAH     | 7 | 0.35306273 | 3.68E-75  | 6.72E-71  | 0.616 | 0.312 |
| THBS1    | 7 | 0.35166917 | 2.99E-66  | 5.46E-62  | 0.289 | 0.094 |
| FAAP20   | 7 | 0.35098296 | 6.06E-68  | 1.11E-63  | 0.777 | 0.498 |
| COL27A1  | 7 | 0.35059459 | 2.05E-102 | 3.75E-98  | 0.47  | 0.168 |
| CNN3     | 7 | 0.35028166 | 1.64E-75  | 2.99E-71  | 0.61  | 0.307 |
| OAZ2     | 7 | 0.35002787 | 1.84E-87  | 3.35E-83  | 0.649 | 0.327 |
| SDF2L1   | 7 | 0.34972436 | 1.15E-78  | 2.10E-74  | 0.54  | 0.245 |
| ATOX1    | 7 | 0.34951261 | 1.57E-60  | 2.86E-56  | 0.894 | 0.765 |
| EMILIN1  | 7 | 0.34907683 | 5.72E-134 | 1.04E-129 | 0.478 | 0.144 |
| GLRX     | 7 | 0.34882354 | 1.84E-73  | 3.35E-69  | 0.635 | 0.321 |
| JOSD2    | 7 | 0.34815194 | 2.40E-74  | 4.38E-70  | 0.744 | 0.457 |
| TIMM13   | 7 | 0.34693047 | 2.28E-70  | 4.16E-66  | 0.712 | 0.433 |
| TAX1BP3  | 7 | 0.34675414 | 1.94E-88  | 3.55E-84  | 0.529 | 0.225 |
| ANKH     | 7 | 0.34581684 | 3.10E-61  | 5.66E-57  | 0.791 | 0.53  |
| COX7A1   | 7 | 0.34577109 | 5.23E-45  | 9.55E-41  | 0.913 | 0.815 |
| ARPC1A   | 7 | 0.34541186 | 7.52E-66  | 1.37E-61  | 0.785 | 0.512 |
| CTTN     | 7 | 0.34442189 | 1.97E-50  | 3.60E-46  | 0.639 | 0.399 |
| UBL5     | 7 | 0.3441833  | 9.91E-68  | 1.81E-63  | 0.983 | 0.948 |
| SMOC1    | 7 | 0.34358098 | 7.35E-77  | 1.34E-72  | 0.538 | 0.247 |
| PGAM1    | 7 | 0.3433253  | 1.61E-52  | 2.93E-48  | 0.919 | 0.779 |

|          |   |            |           |           |       |       |
|----------|---|------------|-----------|-----------|-------|-------|
| YWHAB    | 7 | 0.34270149 | 3.00E-74  | 5.48E-70  | 0.68  | 0.377 |
| AEBP1    | 7 | 0.34198431 | 3.05E-50  | 5.56E-46  | 0.832 | 0.589 |
| IL11     | 7 | 0.34111418 | 3.00E-08  | 5.48E-04  | 0.141 | 0.084 |
| CERCAM   | 7 | 0.34094196 | 3.01E-173 | 5.50E-169 | 0.41  | 0.09  |
| CYCS     | 7 | 0.34041716 | 1.49E-47  | 2.73E-43  | 0.696 | 0.483 |
| GJA1     | 7 | 0.34014199 | 5.52E-62  | 1.01E-57  | 0.431 | 0.19  |
| RCAN1    | 7 | 0.33977632 | 1.23E-71  | 2.24E-67  | 0.287 | 0.089 |
| MRC2     | 7 | 0.33961049 | 1.02E-88  | 1.86E-84  | 0.564 | 0.248 |
| TFDP1    | 7 | 0.33804909 | 1.16E-158 | 2.12E-154 | 0.456 | 0.116 |
| IMPAD1   | 7 | 0.33797866 | 1.51E-125 | 2.76E-121 | 0.498 | 0.162 |
| COTL1    | 7 | 0.33785625 | 4.38E-157 | 7.99E-153 | 0.373 | 0.081 |
| GTF3C6   | 7 | 0.33744548 | 3.60E-66  | 6.57E-62  | 0.624 | 0.351 |
| SNRPG    | 7 | 0.33684774 | 9.50E-49  | 1.73E-44  | 0.894 | 0.72  |
| MRPL23   | 7 | 0.3357167  | 5.14E-72  | 9.38E-68  | 0.693 | 0.394 |
| SUMO1    | 7 | 0.33518137 | 8.44E-70  | 1.54E-65  | 0.896 | 0.678 |
| SPTLC3   | 7 | 0.33439843 | 7.01E-50  | 1.28E-45  | 0.42  | 0.199 |
| COX8A    | 7 | 0.33406991 | 3.45E-53  | 6.29E-49  | 0.948 | 0.873 |
| LTBP2    | 7 | 0.33347197 | 1.70E-151 | 3.10E-147 | 0.417 | 0.102 |
| DDIT4    | 7 | 0.33282563 | 1.11E-13  | 2.03E-09  | 0.583 | 0.466 |
| CBX5     | 7 | 0.33191095 | 1.39E-66  | 2.53E-62  | 0.639 | 0.352 |
| CDC42    | 7 | 0.33081004 | 2.83E-28  | 5.16E-24  | 0.779 | 0.649 |
| SRSF9    | 7 | 0.33071268 | 3.90E-57  | 7.11E-53  | 0.787 | 0.532 |
| LSM1     | 7 | 0.33069265 | 2.26E-83  | 4.12E-79  | 0.58  | 0.275 |
| CLMP     | 7 | 0.3305993  | 6.10E-88  | 1.11E-83  | 0.479 | 0.187 |
| ATP5I    | 7 | 0.32926778 | 7.77E-74  | 1.42E-69  | 0.989 | 0.955 |
| MARVELD1 | 7 | 0.32907372 | 1.13E-163 | 2.07E-159 | 0.428 | 0.101 |
| MMP14    | 7 | 0.32860036 | 2.91E-76  | 5.31E-72  | 0.439 | 0.175 |
| C6orf62  | 7 | 0.32856553 | 3.81E-75  | 6.96E-71  | 0.62  | 0.322 |
| P4HB     | 7 | 0.32837233 | 2.56E-54  | 4.67E-50  | 0.964 | 0.808 |
| FLNA     | 7 | 0.32769368 | 1.36E-115 | 2.48E-111 | 0.44  | 0.137 |
| FKBP2    | 7 | 0.32747736 | 4.76E-52  | 8.68E-48  | 0.857 | 0.655 |
| LTBP1    | 7 | 0.32716732 | 1.49E-64  | 2.71E-60  | 0.351 | 0.135 |
| P2RY6    | 7 | 0.32711201 | 3.21E-253 | 5.87E-249 | 0.332 | 0.04  |
| FDPS     | 7 | 0.32674006 | 4.98E-71  | 9.09E-67  | 0.489 | 0.219 |
| TSPO     | 7 | 0.32665431 | 1.10E-57  | 2.01E-53  | 0.95  | 0.813 |
| SWI5     | 7 | 0.32629499 | 6.74E-67  | 1.23E-62  | 0.693 | 0.415 |
| TXNL4A   | 7 | 0.32601313 | 4.99E-60  | 9.11E-56  | 0.697 | 0.437 |
| MLF2     | 7 | 0.32564533 | 2.46E-67  | 4.49E-63  | 0.719 | 0.44  |
| BANF1    | 7 | 0.32532369 | 1.14E-58  | 2.07E-54  | 0.766 | 0.509 |

|          |   |            |           |           |       |       |
|----------|---|------------|-----------|-----------|-------|-------|
| SEC61G   | 7 | 0.32469856 | 5.54E-68  | 1.01E-63  | 0.999 | 0.995 |
| PMEPA1   | 7 | 0.32370185 | 2.70E-43  | 4.92E-39  | 0.443 | 0.237 |
| ZNF580   | 7 | 0.32364858 | 2.95E-91  | 5.39E-87  | 0.577 | 0.254 |
| VAMP5    | 7 | 0.3226026  | 1.04E-58  | 1.90E-54  | 0.707 | 0.445 |
| PRMT2    | 7 | 0.3224115  | 8.37E-59  | 1.53E-54  | 0.767 | 0.505 |
| MYL9     | 7 | 0.32211422 | 8.65E-69  | 1.58E-64  | 0.471 | 0.21  |
| CTSZ     | 7 | 0.32210156 | 1.56E-100 | 2.85E-96  | 0.511 | 0.194 |
| AP3S1    | 7 | 0.32201727 | 1.67E-63  | 3.04E-59  | 0.945 | 0.769 |
| TPST1    | 7 | 0.32168673 | 5.24E-90  | 9.55E-86  | 0.46  | 0.173 |
| LRP1     | 7 | 0.32160299 | 2.57E-57  | 4.69E-53  | 0.743 | 0.486 |
| PTP4A2   | 7 | 0.31920833 | 1.61E-61  | 2.94E-57  | 0.74  | 0.466 |
| GALNT1   | 7 | 0.31912144 | 9.30E-76  | 1.70E-71  | 0.537 | 0.25  |
| SHFM1    | 7 | 0.31889473 | 4.76E-60  | 8.68E-56  | 0.945 | 0.855 |
| GAS1     | 7 | 0.31868463 | 1.99E-57  | 3.63E-53  | 0.435 | 0.197 |
| YWHAZ    | 7 | 0.31704263 | 2.56E-55  | 4.68E-51  | 0.801 | 0.563 |
| MLLT11   | 7 | 0.31693856 | 7.65E-109 | 1.40E-104 | 0.358 | 0.099 |
| GMDS     | 7 | 0.31592472 | 1.18E-60  | 2.15E-56  | 0.548 | 0.284 |
| MXRA5    | 7 | 0.31504702 | 8.16E-220 | 1.49E-215 | 0.339 | 0.048 |
| DUSP14   | 7 | 0.31496352 | 9.65E-84  | 1.76E-79  | 0.46  | 0.181 |
| UQCC2    | 7 | 0.31482168 | 1.91E-46  | 3.48E-42  | 0.696 | 0.468 |
| TMEM263  | 7 | 0.313997   | 3.00E-66  | 5.47E-62  | 0.622 | 0.339 |
| JTB      | 7 | 0.31398425 | 5.49E-51  | 1.00E-46  | 0.892 | 0.728 |
| TMEM165  | 7 | 0.31366981 | 1.41E-66  | 2.56E-62  | 0.635 | 0.343 |
| ACTB     | 7 | 0.3130224  | 5.60E-20  | 1.02E-15  | 0.956 | 0.945 |
| HIGD2A   | 7 | 0.31207778 | 1.51E-65  | 2.75E-61  | 0.623 | 0.345 |
| TADA3    | 7 | 0.31179792 | 3.35E-72  | 6.12E-68  | 0.631 | 0.331 |
| MYLK     | 7 | 0.31103572 | 3.58E-37  | 6.53E-33  | 0.467 | 0.266 |
| ACTN4    | 7 | 0.31008871 | 1.15E-76  | 2.10E-72  | 0.498 | 0.217 |
| SH3BGRL  | 7 | 0.30976803 | 1.49E-52  | 2.72E-48  | 0.748 | 0.515 |
| KAZALD1  | 7 | 0.30909219 | 4.73E-85  | 8.64E-81  | 0.432 | 0.161 |
| ITGAE    | 7 | 0.30879379 | 2.85E-104 | 5.20E-100 | 0.511 | 0.189 |
| TMEM106C | 7 | 0.3084494  | 1.25E-44  | 2.28E-40  | 0.565 | 0.345 |
| ATPIF1   | 7 | 0.30840171 | 7.86E-47  | 1.43E-42  | 0.863 | 0.674 |
| ITGB1BP1 | 7 | 0.30755041 | 4.22E-59  | 7.70E-55  | 0.707 | 0.439 |
| CHCHD2   | 7 | 0.30746929 | 1.13E-64  | 2.05E-60  | 0.991 | 0.964 |
| C14orf1  | 7 | 0.30734277 | 8.47E-55  | 1.55E-50  | 0.544 | 0.293 |
| ADAMTS2  | 7 | 0.30715725 | 2.40E-129 | 4.38E-125 | 0.443 | 0.127 |
| TRPS1    | 7 | 0.30677537 | 1.23E-53  | 2.24E-49  | 0.715 | 0.443 |
| FHL1     | 7 | 0.30664205 | 3.33E-13  | 6.08E-09  | 0.546 | 0.429 |

|          |   |            |           |           |       |       |
|----------|---|------------|-----------|-----------|-------|-------|
| GPAA1    | 7 | 0.30656221 | 4.59E-66  | 8.37E-62  | 0.638 | 0.348 |
| MRPL14   | 7 | 0.30549071 | 2.13E-53  | 3.89E-49  | 0.794 | 0.556 |
| GTF2H5   | 7 | 0.3053176  | 1.91E-43  | 3.48E-39  | 0.793 | 0.604 |
| CTDNEP1  | 7 | 0.30511085 | 2.50E-74  | 4.57E-70  | 0.549 | 0.262 |
| PLEC     | 7 | 0.30464714 | 4.37E-124 | 7.97E-120 | 0.396 | 0.108 |
| ISLR     | 7 | 0.30428618 | 3.84E-44  | 7.01E-40  | 0.715 | 0.463 |
| CBX6     | 7 | 0.3039908  | 2.53E-52  | 4.62E-48  | 0.482 | 0.249 |
| MPC2     | 7 | 0.30319969 | 1.80E-57  | 3.28E-53  | 0.707 | 0.441 |
| HMGCS1   | 7 | 0.30274993 | 6.43E-70  | 1.17E-65  | 0.334 | 0.117 |
| TGFB1    | 7 | 0.30261025 | 9.71E-96  | 1.77E-91  | 0.394 | 0.129 |
| COX7B    | 7 | 0.30230479 | 1.39E-44  | 2.54E-40  | 0.813 | 0.621 |
| UQCR11   | 7 | 0.30201524 | 1.59E-66  | 2.90E-62  | 0.987 | 0.961 |
| TLN1     | 7 | 0.30107048 | 1.78E-83  | 3.25E-79  | 0.485 | 0.198 |
| AES      | 7 | 0.30095063 | 7.11E-71  | 1.30E-66  | 0.553 | 0.27  |
| BOLA3    | 7 | 0.3008222  | 4.03E-60  | 7.34E-56  | 0.536 | 0.276 |
| MXD4     | 7 | 0.30078383 | 4.12E-129 | 7.52E-125 | 0.369 | 0.092 |
| RHOA     | 7 | 0.3003863  | 8.22E-47  | 1.50E-42  | 0.926 | 0.835 |
| PNKD     | 7 | 0.29984842 | 2.73E-63  | 4.98E-59  | 0.643 | 0.36  |
| PPIA     | 7 | 0.29968406 | 2.55E-56  | 4.65E-52  | 0.989 | 0.959 |
| SURF4    | 7 | 0.2996305  | 5.21E-74  | 9.50E-70  | 0.536 | 0.25  |
| RPL22L1  | 7 | 0.29955342 | 7.83E-32  | 1.43E-27  | 0.773 | 0.618 |
| METTL9   | 7 | 0.29908422 | 5.46E-78  | 9.96E-74  | 0.591 | 0.284 |
| C17orf89 | 7 | 0.29901315 | 1.19E-57  | 2.18E-53  | 0.654 | 0.393 |
| NQO1     | 7 | 0.29844041 | 3.87E-126 | 7.07E-122 | 0.357 | 0.087 |
| PTGER2   | 7 | 0.2982768  | 2.80E-126 | 5.11E-122 | 0.338 | 0.079 |
| ERH      | 7 | 0.29801889 | 5.31E-44  | 9.70E-40  | 0.884 | 0.71  |
| TPI1     | 7 | 0.29687385 | 1.61E-46  | 2.94E-42  | 0.993 | 0.989 |
| NDUFS6   | 7 | 0.29666587 | 3.84E-45  | 7.01E-41  | 0.624 | 0.411 |
| AP2M1    | 7 | 0.296326   | 7.26E-47  | 1.32E-42  | 0.789 | 0.543 |
| SEC61A1  | 7 | 0.29620202 | 2.12E-98  | 3.86E-94  | 0.486 | 0.178 |
| UQCR10   | 7 | 0.29604656 | 1.30E-52  | 2.38E-48  | 0.938 | 0.798 |
| NDUFA11  | 7 | 0.29548741 | 2.48E-52  | 4.52E-48  | 0.956 | 0.875 |
| YIF1B    | 7 | 0.29544314 | 1.15E-88  | 2.10E-84  | 0.476 | 0.186 |
| NHP2     | 7 | 0.29492855 | 6.05E-48  | 1.10E-43  | 0.709 | 0.479 |
| IER3IP1  | 7 | 0.29483498 | 3.07E-48  | 5.60E-44  | 0.834 | 0.62  |
| HSPB1    | 7 | 0.2945994  | 1.18E-33  | 2.16E-29  | 0.864 | 0.7   |
| TSPAN4   | 7 | 0.29452957 | 1.28E-44  | 2.33E-40  | 0.696 | 0.466 |
| NGFRAP1  | 7 | 0.29230824 | 2.27E-33  | 4.14E-29  | 0.938 | 0.838 |
| MAP7D3   | 7 | 0.2915499  | 5.48E-48  | 9.99E-44  | 0.491 | 0.259 |

|            |   |            |           |           |       |       |
|------------|---|------------|-----------|-----------|-------|-------|
| PXDN       | 7 | 0.29097699 | 5.05E-131 | 9.21E-127 | 0.386 | 0.098 |
| HRCT1      | 7 | 0.29092151 | 1.71E-76  | 3.12E-72  | 0.252 | 0.067 |
| CDK2AP1    | 7 | 0.28979791 | 1.98E-92  | 3.61E-88  | 0.458 | 0.168 |
| SLC20A1    | 7 | 0.28977729 | 1.18E-36  | 2.15E-32  | 0.432 | 0.237 |
| SRA1       | 7 | 0.28902951 | 1.62E-63  | 2.96E-59  | 0.502 | 0.243 |
| LINC00116  | 7 | 0.28896528 | 7.75E-46  | 1.41E-41  | 0.759 | 0.541 |
| BRI3       | 7 | 0.28881987 | 1.43E-42  | 2.61E-38  | 0.937 | 0.83  |
| SULF1      | 7 | 0.28855779 | 6.10E-72  | 1.11E-67  | 0.316 | 0.104 |
| MAGED1     | 7 | 0.28801541 | 5.03E-89  | 9.18E-85  | 0.577 | 0.239 |
| DNAJC22    | 7 | 0.28795223 | 1.00E-137 | 1.83E-133 | 0.221 | 0.032 |
| ORA12      | 7 | 0.28786783 | 6.18E-104 | 1.13E-99  | 0.405 | 0.127 |
| SLC38A2    | 7 | 0.28766881 | 3.70E-51  | 6.75E-47  | 0.627 | 0.371 |
| COX6C      | 7 | 0.28753148 | 2.08E-47  | 3.79E-43  | 0.931 | 0.835 |
| ANAPC11    | 7 | 0.2868404  | 1.42E-40  | 2.59E-36  | 0.89  | 0.756 |
| TMEM14A    | 7 | 0.28671861 | 1.28E-53  | 2.33E-49  | 0.63  | 0.375 |
| DGCR6L     | 7 | 0.28577249 | 2.49E-51  | 4.55E-47  | 0.63  | 0.388 |
| CETN2      | 7 | 0.28531849 | 8.12E-61  | 1.48E-56  | 0.584 | 0.308 |
| ST6GALNAC6 | 7 | 0.2851133  | 2.16E-81  | 3.95E-77  | 0.495 | 0.208 |
| SDHC       | 7 | 0.28497755 | 3.59E-60  | 6.55E-56  | 0.553 | 0.291 |
| ROMO1      | 7 | 0.28456062 | 1.60E-39  | 2.91E-35  | 0.913 | 0.821 |
| SNHG18     | 7 | 0.28415562 | 1.19E-63  | 2.17E-59  | 0.556 | 0.278 |
| HSPE1      | 7 | 0.28414991 | 6.85E-31  | 1.25E-26  | 0.781 | 0.628 |
| AP2B1      | 7 | 0.28411154 | 1.89E-50  | 3.44E-46  | 0.513 | 0.278 |
| PRELID1    | 7 | 0.28382602 | 3.84E-39  | 7.00E-35  | 0.875 | 0.727 |
| SHISA4     | 7 | 0.28372104 | 1.45E-62  | 2.64E-58  | 0.482 | 0.227 |
| SLC35B2    | 7 | 0.28353584 | 2.14E-73  | 3.90E-69  | 0.486 | 0.208 |
| IKBIP      | 7 | 0.28348141 | 1.73E-63  | 3.16E-59  | 0.53  | 0.26  |
| SEPT2      | 7 | 0.2833341  | 2.03E-60  | 3.70E-56  | 0.592 | 0.326 |
| SMIM5      | 7 | 0.28319927 | 1.51E-74  | 2.75E-70  | 0.331 | 0.11  |
| CYB5R3     | 7 | 0.28303528 | 2.63E-44  | 4.80E-40  | 0.849 | 0.646 |
| TBPL1      | 7 | 0.28273564 | 9.79E-41  | 1.79E-36  | 0.53  | 0.316 |
| RSPO2      | 7 | 0.28248356 | 2.58E-84  | 4.72E-80  | 0.268 | 0.07  |
| SLC1A5     | 7 | 0.28230415 | 1.21E-45  | 2.21E-41  | 0.475 | 0.255 |
| FKBP11     | 7 | 0.28218148 | 1.41E-64  | 2.56E-60  | 0.448 | 0.195 |
| RABAC1     | 7 | 0.28145649 | 1.09E-44  | 1.99E-40  | 0.946 | 0.819 |
| ADAM12     | 7 | 0.28106138 | 3.24E-219 | 5.92E-215 | 0.303 | 0.038 |
| SDC2       | 7 | 0.28052795 | 4.99E-29  | 9.10E-25  | 0.914 | 0.824 |
| ZNF428     | 7 | 0.28046504 | 9.22E-66  | 1.68E-61  | 0.563 | 0.283 |
| CAPZA1     | 7 | 0.28022249 | 2.60E-47  | 4.75E-43  | 0.604 | 0.363 |

|          |   |            |           |           |       |       |
|----------|---|------------|-----------|-----------|-------|-------|
| ARL5A    | 7 | 0.27967895 | 1.63E-51  | 2.98E-47  | 0.665 | 0.414 |
| ISOC2    | 7 | 0.27676495 | 3.74E-65  | 6.82E-61  | 0.495 | 0.232 |
| CALM1    | 7 | 0.27651767 | 4.44E-36  | 8.10E-32  | 0.754 | 0.537 |
| TMEM14B  | 7 | 0.27597885 | 8.11E-48  | 1.48E-43  | 0.738 | 0.501 |
| CDC42EP1 | 7 | 0.27590701 | 1.64E-109 | 2.99E-105 | 0.398 | 0.118 |
| NPM3     | 7 | 0.275287   | 8.51E-86  | 1.55E-81  | 0.421 | 0.153 |
| B4GALT7  | 7 | 0.27457266 | 6.83E-79  | 1.25E-74  | 0.464 | 0.189 |
| GAPDH    | 7 | 0.27443849 | 5.43E-35  | 9.91E-31  | 1     | 1     |
| PHPT1    | 7 | 0.27420733 | 5.58E-44  | 1.02E-39  | 0.913 | 0.751 |
| SKA2     | 7 | 0.27329592 | 3.19E-102 | 5.83E-98  | 0.357 | 0.102 |
| MAZ      | 7 | 0.27276654 | 1.49E-78  | 2.72E-74  | 0.459 | 0.185 |
| UBE2J1   | 7 | 0.27265258 | 4.53E-57  | 8.26E-53  | 0.498 | 0.248 |
| TPGS2    | 7 | 0.27230296 | 3.35E-59  | 6.11E-55  | 0.522 | 0.263 |
| MYL12A   | 7 | 0.2716498  | 4.76E-33  | 8.68E-29  | 0.728 | 0.55  |
| SERP1    | 7 | 0.2716265  | 3.42E-34  | 6.24E-30  | 0.899 | 0.829 |
| GOLM1    | 7 | 0.271507   | 1.20E-61  | 2.19E-57  | 0.472 | 0.22  |
| BIRC2    | 7 | 0.27135908 | 4.28E-44  | 7.81E-40  | 0.653 | 0.414 |
| LAMTOR1  | 7 | 0.27113905 | 9.92E-44  | 1.81E-39  | 0.786 | 0.575 |
| MANF     | 7 | 0.27039014 | 3.71E-47  | 6.77E-43  | 0.567 | 0.322 |
| B4GALT2  | 7 | 0.27021393 | 4.38E-158 | 7.99E-154 | 0.323 | 0.06  |
| PLOD2    | 7 | 0.27018021 | 9.69E-41  | 1.77E-36  | 0.892 | 0.741 |
| PABPN1   | 7 | 0.26988459 | 2.56E-74  | 4.67E-70  | 0.467 | 0.195 |
| SGCB     | 7 | 0.26977438 | 4.69E-44  | 8.56E-40  | 0.651 | 0.407 |
| NDUFA13  | 7 | 0.26929896 | 1.13E-33  | 2.07E-29  | 0.791 | 0.622 |
| EHBP1    | 7 | 0.2685783  | 2.01E-91  | 3.66E-87  | 0.361 | 0.112 |
| FIBP     | 7 | 0.26834694 | 2.27E-45  | 4.14E-41  | 0.639 | 0.406 |
| EHD2     | 7 | 0.26770273 | 1.80E-72  | 3.29E-68  | 0.472 | 0.202 |
| NTAN1    | 7 | 0.26695261 | 7.95E-63  | 1.45E-58  | 0.466 | 0.213 |
| C4orf3   | 7 | 0.26692946 | 2.88E-46  | 5.25E-42  | 0.991 | 0.978 |
| PRRX2    | 7 | 0.26655455 | 2.54E-79  | 4.63E-75  | 0.346 | 0.114 |
| FAM46A   | 7 | 0.26611752 | 4.03E-19  | 7.35E-15  | 0.705 | 0.56  |
| DNAJC3   | 7 | 0.26600732 | 3.38E-38  | 6.16E-34  | 0.58  | 0.366 |
| SCN1B    | 7 | 0.26511383 | 1.11E-89  | 2.03E-85  | 0.37  | 0.119 |
| MPG      | 7 | 0.26493858 | 2.65E-40  | 4.83E-36  | 0.69  | 0.474 |
| MAP3K13  | 7 | 0.26479325 | 4.30E-62  | 7.84E-58  | 0.581 | 0.303 |
| FKBP9    | 7 | 0.26477593 | 8.39E-61  | 1.53E-56  | 0.431 | 0.19  |
| SYNGR1   | 7 | 0.26423367 | 1.54E-113 | 2.82E-109 | 0.363 | 0.097 |
| DHCR24   | 7 | 0.26419919 | 1.02E-150 | 1.86E-146 | 0.304 | 0.056 |
| IFT20    | 7 | 0.26414047 | 1.07E-57  | 1.95E-53  | 0.569 | 0.302 |

|               |   |            |           |           |       |       |
|---------------|---|------------|-----------|-----------|-------|-------|
| RARG          | 7 | 0.26407581 | 8.50E-77  | 1.55E-72  | 0.369 | 0.13  |
| SELT          | 7 | 0.2631249  | 3.77E-40  | 6.89E-36  | 0.755 | 0.551 |
| POLR2J3       | 7 | 0.26304652 | 5.27E-68  | 9.61E-64  | 0.486 | 0.217 |
| FXYD6         | 7 | 0.26204232 | 4.93E-30  | 8.99E-26  | 0.907 | 0.805 |
| MSMO1         | 7 | 0.2619842  | 1.30E-45  | 2.38E-41  | 0.502 | 0.271 |
| POLR3H        | 7 | 0.26174766 | 2.62E-88  | 4.79E-84  | 0.386 | 0.13  |
| TMEM54        | 7 | 0.26090655 | 1.21E-83  | 2.20E-79  | 0.396 | 0.139 |
| RSRP1         | 7 | 0.26090534 | 4.02E-48  | 7.34E-44  | 0.525 | 0.289 |
| CBR1          | 7 | 0.26052939 | 1.32E-47  | 2.41E-43  | 0.514 | 0.278 |
| PKM           | 7 | 0.26046092 | 7.54E-35  | 1.38E-30  | 0.964 | 0.924 |
| SMCO4         | 7 | 0.25951641 | 8.09E-66  | 1.48E-61  | 0.476 | 0.214 |
| ERGIC1        | 7 | 0.25945499 | 1.13E-54  | 2.07E-50  | 0.502 | 0.254 |
| ITGBL1        | 7 | 0.25898052 | 6.22E-70  | 1.13E-65  | 0.342 | 0.12  |
| GTF2I         | 7 | 0.25856043 | 2.31E-71  | 4.21E-67  | 0.462 | 0.195 |
| LAMTOR2       | 7 | 0.25790106 | 3.80E-44  | 6.94E-40  | 0.686 | 0.458 |
| FAM89B        | 7 | 0.25710733 | 2.55E-67  | 4.65E-63  | 0.358 | 0.134 |
| MXRA8         | 7 | 0.25694904 | 6.52E-56  | 1.19E-51  | 0.49  | 0.236 |
| CCDC167       | 7 | 0.25692376 | 4.65E-69  | 8.48E-65  | 0.431 | 0.179 |
| BRK1          | 7 | 0.25670802 | 7.85E-42  | 1.43E-37  | 0.945 | 0.846 |
| SUB1          | 7 | 0.25663587 | 6.47E-34  | 1.18E-29  | 0.929 | 0.833 |
| FTH1          | 7 | 0.25651392 | 1.20E-21  | 2.18E-17  | 1     | 1     |
| GGH           | 7 | 0.25629657 | 5.19E-86  | 9.46E-82  | 0.369 | 0.119 |
| SLC25A39      | 7 | 0.25624673 | 1.90E-52  | 3.48E-48  | 0.479 | 0.243 |
| C19orf24      | 7 | 0.25529499 | 3.29E-47  | 6.00E-43  | 0.686 | 0.431 |
| SRP14         | 7 | 0.25486548 | 1.37E-41  | 2.50E-37  | 0.989 | 0.982 |
| NBL1          | 7 | 0.254737   | 2.53E-76  | 4.62E-72  | 0.244 | 0.064 |
| CLIC3         | 7 | 0.25458902 | 1.53E-52  | 2.78E-48  | 0.365 | 0.154 |
| DDX5          | 7 | 0.2545159  | 4.53E-37  | 8.27E-33  | 0.775 | 0.577 |
| RP11-783K16.5 | 7 | 0.25433065 | 3.06E-289 | 5.58E-285 | 0.266 | 0.02  |
| LMAN2         | 7 | 0.25397478 | 2.86E-42  | 5.21E-38  | 0.674 | 0.432 |
| PDAP1         | 7 | 0.25371419 | 5.45E-41  | 9.94E-37  | 0.68  | 0.45  |
| MZT2B         | 7 | 0.25369948 | 7.51E-44  | 1.37E-39  | 0.98  | 0.956 |
| CDK16         | 7 | 0.25361715 | 1.35E-76  | 2.47E-72  | 0.386 | 0.141 |
| CTNNB1        | 7 | 0.25307415 | 7.05E-11  | 1.29E-06  | 0.51  | 0.397 |
| C5orf24       | 7 | 0.25281698 | 1.54E-54  | 2.80E-50  | 0.533 | 0.275 |
| TUSC3         | 7 | 0.25245796 | 4.12E-49  | 7.51E-45  | 0.448 | 0.224 |
| UROS          | 7 | 0.2523399  | 4.09E-101 | 7.47E-97  | 0.334 | 0.092 |
| PRKCA         | 7 | 0.25199655 | 2.57E-84  | 4.69E-80  | 0.406 | 0.143 |
| MINOS1        | 7 | 0.25157868 | 5.28E-31  | 9.63E-27  | 0.795 | 0.632 |

|             |                |                  |              |                  |              |              |
|-------------|----------------|------------------|--------------|------------------|--------------|--------------|
| SKIL        | 7              | 0.25135358       | 1.02E-41     | 1.87E-37         | 0.459        | 0.25         |
| DEXI        | 7              | 0.2511762        | 5.35E-74     | 9.76E-70         | 0.4          | 0.152        |
| CD63        | 7              | 0.25109663       | 1.46E-30     | 2.67E-26         | 0.999        | 0.999        |
| CCDC28B     | 7              | 0.25002377       | 8.81E-97     | 1.61E-92         | 0.346        | 0.1          |
| <b>gene</b> | <b>cluster</b> | <b>avg_logFC</b> | <b>p_val</b> | <b>p_val_adj</b> | <b>pct.1</b> | <b>pct.2</b> |
| COL2A1      | 8              | 1.48140121       | 3.2664E-303  | 5.9602E-299      | 0.994        | 0.663        |
| COL11A1     | 8              | 1.13204728       | 2.6986E-257  | 4.924E-253       | 0.989        | 0.707        |
| SLPI        | 8              | 0.98701574       | 2.31205E-93  | 4.21881E-89      | 0.983        | 0.925        |
| COL9A3      | 8              | 0.90520274       | 1.76E-150    | 3.219E-146       | 0.915        | 0.615        |
| SPARC       | 8              | 0.87894218       | 1.3187E-186  | 2.4062E-182      | 0.948        | 0.575        |
| C2orf82     | 8              | 0.819749         | 6.6143E-107  | 1.2069E-102      | 0.981        | 0.951        |
| CRISPLD1    | 8              | 0.73254663       | 2.6585E-102  | 4.85094E-98      | 0.585        | 0.245        |
| LECT1       | 8              | 0.69438676       | 7.3898E-116  | 1.3484E-111      | 0.973        | 0.767        |
| PLAC9       | 8              | 0.69330274       | 5.713E-139   | 1.0425E-134      | 0.98         | 0.792        |
| CLEC3A      | 8              | 0.68942105       | 2.84521E-81  | 5.19166E-77      | 0.84         | 0.533        |
| PPIC        | 8              | 0.68265289       | 1.50E-155    | 2.731E-151       | 0.867        | 0.455        |
| COL5A2      | 8              | 0.67541151       | 7.2656E-148  | 1.3258E-143      | 0.834        | 0.389        |
| ACAN        | 8              | 0.65547774       | 2.4028E-138  | 4.3844E-134      | 0.997        | 0.914        |
| HAPLN1      | 8              | 0.63029011       | 5.28826E-95  | 9.64949E-91      | 0.884        | 0.616        |
| COL11A2     | 8              | 0.62504366       | 1.4587E-144  | 2.6618E-140      | 0.867        | 0.483        |
| CAPS        | 8              | 0.59451507       | 8.50864E-70  | 1.55257E-65      | 0.894        | 0.736        |
| COL9A2      | 8              | 0.57836408       | 1.5367E-116  | 2.804E-112       | 0.738        | 0.357        |
| SNAI2       | 8              | 0.57395498       | 2.07E-69     | 3.76981E-65      | 0.748        | 0.495        |
| RBP4        | 8              | 0.55988431       | 3.57789E-72  | 6.52858E-68      | 0.918        | 0.729        |
| MDFI        | 8              | 0.54605439       | 8.1522E-104  | 1.4875E-99       | 0.825        | 0.491        |
| MATN4       | 8              | 0.52812826       | 9.60617E-98  | 1.75284E-93      | 0.474        | 0.172        |
| ID4         | 8              | 0.51942016       | 1.02391E-73  | 1.86833E-69      | 0.804        | 0.533        |
| ID3         | 8              | 0.49695661       | 1.47051E-60  | 2.68325E-56      | 0.832        | 0.559        |
| SPTSSB      | 8              | 0.48787972       | 2.46141E-31  | 4.49134E-27      | 0.513        | 0.322        |
| PPIB        | 8              | 0.48282568       | 2.48E-95     | 4.52681E-91      | 0.971        | 0.892        |
| ID1         | 8              | 0.47446958       | 9.8052E-64   | 1.78915E-59      | 0.858        | 0.591        |
| C6orf48     | 8              | 0.46869068       | 1.25314E-77  | 2.28661E-73      | 0.94         | 0.855        |
| FBXO2       | 8              | 0.46624319       | 1.03144E-72  | 1.88206E-68      | 0.911        | 0.732        |
| LSP1        | 8              | 0.45139491       | 2.55491E-77  | 4.66195E-73      | 0.648        | 0.326        |
| P4HB        | 8              | 0.44495429       | 2.45388E-69  | 4.47759E-65      | 0.963        | 0.808        |
| SSR4        | 8              | 0.43616931       | 2.2489E-100  | 4.1035E-96       | 0.994        | 0.957        |
| SERPINA5    | 8              | 0.43615068       | 1.41E-77     | 2.56726E-73      | 0.818        | 0.514        |
| IGFBP6      | 8              | 0.43424554       | 6.16158E-46  | 1.1243E-41       | 0.831        | 0.637        |
| C7orf73     | 8              | 0.42941238       | 4.19358E-78  | 7.65203E-74      | 0.918        | 0.738        |



|         |   |            |             |             |       |       |
|---------|---|------------|-------------|-------------|-------|-------|
| SCRG1   | 8 | 0.41896094 | 3.1562E-63  | 5.75911E-59 | 1     | 0.974 |
| ID2     | 8 | 0.41167304 | 2.44741E-42 | 4.46578E-38 | 0.766 | 0.56  |
| FMOD    | 8 | 0.4064008  | 9.97381E-86 | 1.81992E-81 | 0.99  | 0.883 |
| MYDGF   | 8 | 0.40605269 | 4.07597E-70 | 7.43743E-66 | 0.914 | 0.77  |
| DNM3OS  | 8 | 0.39642035 | 2.15E-75    | 3.91791E-71 | 0.678 | 0.35  |
| OSTC    | 8 | 0.39251119 | 8.89826E-78 | 1.62367E-73 | 0.951 | 0.802 |
| NUCB2   | 8 | 0.39056307 | 4.16848E-52 | 7.60623E-48 | 0.695 | 0.44  |
| MIA     | 8 | 0.38860917 | 6.58195E-67 | 1.20101E-62 | 0.996 | 0.96  |
| PDIA6   | 8 | 0.38695471 | 6.9187E-61  | 1.26246E-56 | 0.87  | 0.659 |
| IGF2    | 8 | 0.38603605 | 1.20429E-17 | 2.19747E-13 | 0.317 | 0.194 |
| VKORC1  | 8 | 0.38319228 | 7.01829E-78 | 1.28063E-73 | 0.989 | 0.948 |
| MYLK    | 8 | 0.37984135 | 4.83E-48    | 8.81825E-44 | 0.5   | 0.265 |
| MT-CO2  | 8 | 0.37605511 | 3.54623E-55 | 6.47081E-51 | 0.979 | 0.927 |
| SLC26A2 | 8 | 0.37594889 | 3.74367E-79 | 6.83107E-75 | 0.499 | 0.211 |
| HSP90B1 | 8 | 0.37047515 | 1.218E-54   | 2.22248E-50 | 0.914 | 0.779 |
| MSMO1   | 8 | 0.36117819 | 2.43638E-38 | 4.44565E-34 | 0.473 | 0.273 |
| TSC22D1 | 8 | 0.35684225 | 7.39891E-36 | 1.35008E-31 | 0.867 | 0.714 |
| TMED2   | 8 | 0.35523652 | 5.21032E-67 | 9.50727E-63 | 0.947 | 0.82  |
| SOX9    | 8 | 0.35511791 | 4.77E-43    | 8.70849E-39 | 0.837 | 0.658 |
| P4HA1   | 8 | 0.35330511 | 2.39347E-51 | 4.36736E-47 | 0.837 | 0.654 |
| CD99    | 8 | 0.35110465 | 6.00867E-68 | 1.0964E-63  | 0.991 | 0.922 |
| INSIG1  | 8 | 0.34899561 | 1.43635E-26 | 2.62092E-22 | 0.577 | 0.413 |
| KDELR2  | 8 | 0.34879604 | 3.68324E-55 | 6.7208E-51  | 0.941 | 0.855 |
| CNPY2   | 8 | 0.34490924 | 2.72112E-51 | 4.96523E-47 | 0.822 | 0.636 |
| RCN2    | 8 | 0.34358315 | 1.15707E-58 | 2.1113E-54  | 0.86  | 0.637 |
| ASPN    | 8 | 0.34082362 | 4.03E-13    | 7.35353E-09 | 0.218 | 0.126 |
| EPYC    | 8 | 0.33945121 | 2.9218E-34  | 5.3314E-30  | 0.334 | 0.162 |
| MT-ND3  | 8 | 0.33926099 | 1.39664E-49 | 2.54844E-45 | 0.924 | 0.687 |
| IDI1    | 8 | 0.33402372 | 2.06502E-48 | 3.76805E-44 | 0.526 | 0.286 |
| FXYP6   | 8 | 0.33382743 | 1.5197E-52  | 2.77299E-48 | 0.946 | 0.803 |
| OAF     | 8 | 0.33179176 | 7.66759E-67 | 1.3991E-62  | 0.547 | 0.26  |
| PRDX4   | 8 | 0.33105584 | 3.53551E-45 | 6.45125E-41 | 0.893 | 0.757 |
| FXYP1   | 8 | 0.33032698 | 1.78E-39    | 3.2532E-35  | 0.519 | 0.306 |
| TTC3    | 8 | 0.32753744 | 4.83476E-51 | 8.82198E-47 | 0.874 | 0.691 |
| SDC2    | 8 | 0.32601922 | 1.62254E-42 | 2.96064E-38 | 0.938 | 0.823 |
| SEC61B  | 8 | 0.322399   | 1.11261E-51 | 2.03018E-47 | 0.917 | 0.811 |
| SERF2   | 8 | 0.32181282 | 2.30104E-91 | 4.19871E-87 | 1     | 1     |
| TMED10  | 8 | 0.3215117  | 6.78101E-50 | 1.23733E-45 | 0.941 | 0.867 |
| ISLR    | 8 | 0.31500576 | 4.7441E-39  | 8.65656E-35 | 0.699 | 0.464 |

|          |   |            |             |             |       |       |
|----------|---|------------|-------------|-------------|-------|-------|
| S100A4   | 8 | 0.31397472 | 3.50E-42    | 6.38313E-38 | 0.895 | 0.768 |
| S100B    | 8 | 0.31365267 | 7.77488E-32 | 1.41868E-27 | 0.874 | 0.743 |
| ERGIC3   | 8 | 0.31232001 | 2.13918E-49 | 3.90335E-45 | 0.903 | 0.802 |
| NGFRAP1  | 8 | 0.31192602 | 8.78888E-49 | 1.60371E-44 | 0.954 | 0.838 |
| TMED3    | 8 | 0.31041642 | 4.64871E-42 | 8.48249E-38 | 0.701 | 0.489 |
| TMEM230  | 8 | 0.30962661 | 1.43011E-45 | 2.60953E-41 | 0.86  | 0.704 |
| TMEM258  | 8 | 0.30558546 | 6.71829E-71 | 1.22589E-66 | 0.996 | 0.996 |
| SRM      | 8 | 0.30187232 | 2.57E-42    | 4.68693E-38 | 0.599 | 0.361 |
| MAGED1   | 8 | 0.29844935 | 4.18862E-33 | 7.64298E-29 | 0.443 | 0.247 |
| FKBP10   | 8 | 0.29459717 | 1.8401E-34  | 3.35763E-30 | 0.675 | 0.469 |
| OGN      | 8 | 0.29230866 | 5.55849E-36 | 1.01426E-31 | 0.966 | 0.851 |
| GREM1    | 8 | 0.29166194 | 7.25136E-23 | 1.32316E-18 | 0.248 | 0.122 |
| PAPSS2   | 8 | 0.28923815 | 5.41164E-38 | 9.87463E-34 | 0.703 | 0.48  |
| MT-CO3   | 8 | 0.28889409 | 4.6595E-40  | 8.50219E-36 | 0.974 | 0.883 |
| DDIT4    | 8 | 0.28670993 | 3.67E-07    | 0.006696432 | 0.542 | 0.469 |
| KDELRL3  | 8 | 0.28643314 | 2.62313E-36 | 4.78642E-32 | 0.477 | 0.272 |
| FKBP11   | 8 | 0.2848732  | 4.43319E-64 | 8.08925E-60 | 0.456 | 0.196 |
| CHRD2    | 8 | 0.28482394 | 1.8673E-21  | 3.40725E-17 | 0.357 | 0.209 |
| KRT10    | 8 | 0.28382625 | 7.65569E-38 | 1.39693E-33 | 0.93  | 0.825 |
| MT-ATP6  | 8 | 0.28338971 | 3.63683E-36 | 6.63612E-32 | 0.954 | 0.809 |
| CXXC5    | 8 | 0.28311293 | 4.31908E-38 | 7.88102E-34 | 0.569 | 0.341 |
| H3F3A    | 8 | 0.28185855 | 4.11E-54    | 7.49992E-50 | 0.993 | 0.958 |
| BGN      | 8 | 0.28174934 | 3.11779E-44 | 5.68903E-40 | 1     | 0.984 |
| OTOS     | 8 | 0.28014893 | 4.08215E-46 | 7.4487E-42  | 0.338 | 0.145 |
| ITM2C    | 8 | 0.27956219 | 2.19205E-30 | 3.99983E-26 | 0.746 | 0.544 |
| WWP2     | 8 | 0.27944177 | 2.23864E-27 | 4.08485E-23 | 0.745 | 0.578 |
| TRPS1    | 8 | 0.27935094 | 1.21734E-34 | 2.22129E-30 | 0.659 | 0.447 |
| GOLIM4   | 8 | 0.27746296 | 8.10664E-21 | 1.47922E-16 | 0.6   | 0.439 |
| S100A13  | 8 | 0.2771758  | 1.52E-57    | 2.77818E-53 | 0.999 | 0.994 |
| SSR1     | 8 | 0.27649181 | 2.47525E-35 | 4.5166E-31  | 0.708 | 0.51  |
| CRIP2    | 8 | 0.27577937 | 1.61199E-31 | 2.94139E-27 | 0.61  | 0.419 |
| C1orf122 | 8 | 0.27527734 | 2.67573E-43 | 4.8824E-39  | 0.638 | 0.393 |
| MORF4L2  | 8 | 0.27469938 | 1.13245E-38 | 2.06637E-34 | 0.841 | 0.643 |
| HERPUD1  | 8 | 0.27383678 | 1.60839E-20 | 2.93483E-16 | 0.63  | 0.484 |
| MT-CO1   | 8 | 0.27282167 | 1.69106E-35 | 3.08568E-31 | 0.987 | 0.942 |
| MT-ND1   | 8 | 0.26858204 | 1.90E-30    | 3.47466E-26 | 0.845 | 0.638 |
| OST4     | 8 | 0.26697724 | 1.9394E-67  | 3.53882E-63 | 1     | 0.999 |
| TSPO     | 8 | 0.26657237 | 1.55762E-36 | 2.84219E-32 | 0.911 | 0.816 |
| STK26    | 8 | 0.26648573 | 2.17944E-43 | 3.97683E-39 | 0.477 | 0.251 |

| ITM2A   | 8       | 0.26555598 | 4.49041E-23 | 8.19365E-19 | 0.685 | 0.517 |
|---------|---------|------------|-------------|-------------|-------|-------|
| NDUFA11 | 8       | 0.26409884 | 1.84072E-37 | 3.35876E-33 | 0.951 | 0.876 |
| CRELD2  | 8       | 0.26172443 | 3.95824E-48 | 7.22261E-44 | 0.453 | 0.219 |
| IFT20   | 8       | 0.26041752 | 2.09E-41    | 3.80936E-37 | 0.532 | 0.304 |
| RBM3    | 8       | 0.25973722 | 3.17528E-34 | 5.79393E-30 | 0.728 | 0.529 |
| RABAC1  | 8       | 0.25914191 | 2.22441E-38 | 4.05889E-34 | 0.928 | 0.821 |
| MT-CYB  | 8       | 0.25911523 | 5.96775E-34 | 1.08894E-29 | 0.914 | 0.712 |
| CRTAP   | 8       | 0.25518837 | 1.09051E-31 | 1.98985E-27 | 0.841 | 0.683 |
| EDIL3   | 8       | 0.25395233 | 2.38537E-19 | 4.35258E-15 | 0.563 | 0.426 |
| SERP1   | 8       | 0.25310065 | 8.59089E-35 | 1.56758E-30 | 0.918 | 0.828 |
| MTHFD2  | 8       | 0.25159566 | 8.06E-18    | 1.47123E-13 | 0.678 | 0.556 |
| PDIA4   | 8       | 0.25079744 | 1.44953E-33 | 2.64496E-29 | 0.56  | 0.356 |
| gene    | cluster | avg_logFC  | p_val       | p_val_adj   | pct.1 | pct.2 |
| CTGF    | 9       | 2.36353243 | 2.19E-144   | 3.99E-140   | 0.903 | 0.444 |
| CYR61   | 9       | 1.69705981 | 1.82E-126   | 3.31E-122   | 0.849 | 0.409 |
| COL1A2  | 9       | 1.64081417 | 3.98E-167   | 7.27E-163   | 0.804 | 0.267 |
| PCOLCE  | 9       | 1.36083535 | 5.88E-254   | 1.07E-249   | 0.883 | 0.251 |
| EPYC    | 9       | 1.34793631 | 1.00E-85    | 1.83E-81    | 0.512 | 0.161 |
| COL3A1  | 9       | 1.33567321 | 3.06E-202   | 5.58E-198   | 0.807 | 0.217 |
| ANXA2   | 9       | 1.32221841 | 3.28E-180   | 5.99E-176   | 0.995 | 0.851 |
| TGFBI   | 9       | 1.31296082 | 9.77E-74    | 1.78E-69    | 0.755 | 0.406 |
| THY1    | 9       | 1.30216542 | 1.79E-166   | 3.27E-162   | 0.932 | 0.415 |
| COL1A1  | 9       | 1.29634639 | 3.84E-84    | 7.00E-80    | 0.285 | 0.053 |
| SPARC   | 9       | 1.26061618 | 9.52E-135   | 1.74E-130   | 0.948 | 0.584 |
| LUM     | 9       | 1.25335098 | 5.85E-129   | 1.07E-124   | 1     | 0.999 |
| PPIB    | 9       | 1.21271422 | 2.01E-153   | 3.67E-149   | 1     | 0.893 |
| CLEC11A | 9       | 1.15810144 | 4.65E-114   | 8.49E-110   | 0.82  | 0.443 |
| PKM     | 9       | 1.14451035 | 4.49E-155   | 8.19E-151   | 1     | 0.924 |
| HSPA5   | 9       | 1.1431935  | 2.27E-124   | 4.15E-120   | 0.883 | 0.458 |
| CA9     | 9       | 1.11409194 | 4.37E-145   | 7.97E-141   | 0.846 | 0.347 |
| PDIA3   | 9       | 1.11255273 | 3.06E-161   | 5.58E-157   | 0.953 | 0.572 |
| TPM1    | 9       | 1.10897314 | 1.17E-89    | 2.14E-85    | 0.901 | 0.608 |
| RPN2    | 9       | 1.09232413 | 9.38E-217   | 1.71E-212   | 0.883 | 0.285 |
| CALR    | 9       | 1.07308851 | 3.81E-124   | 6.96E-120   | 0.948 | 0.663 |
| COL2A1  | 9       | 1.06243528 | 3.21E-42    | 5.86E-38    | 0.82  | 0.676 |
| PRSS23  | 9       | 1.06021124 | 4.37E-86    | 7.97E-82    | 0.728 | 0.337 |
| ENO1    | 9       | 1.05781217 | 7.29E-159   | 1.33E-154   | 1     | 0.983 |
| LECT1   | 9       | 1.05159795 | 2.56E-42    | 4.67E-38    | 0.846 | 0.776 |
| IGFBP7  | 9       | 1.05032798 | 1.24E-134   | 2.27E-130   | 0.99  | 0.848 |

|          |   |            |           |           |       |       |
|----------|---|------------|-----------|-----------|-------|-------|
| HSP90B1  | 9 | 1.04860852 | 2.55E-121 | 4.65E-117 | 0.979 | 0.78  |
| S100A4   | 9 | 1.03934905 | 2.82E-89  | 5.14E-85  | 0.961 | 0.769 |
| LOX      | 9 | 1.0161591  | 5.35E-180 | 9.77E-176 | 0.817 | 0.239 |
| ITGB1    | 9 | 1.01228031 | 4.31E-130 | 7.87E-126 | 0.914 | 0.512 |
| PGK1     | 9 | 1.00477294 | 6.00E-145 | 1.09E-140 | 0.992 | 0.908 |
| LGALS1   | 9 | 1.003773   | 8.21E-98  | 1.50E-93  | 1     | 0.972 |
| C1R      | 9 | 1.00023272 | 4.82E-169 | 8.80E-165 | 0.778 | 0.246 |
| PLPP1    | 9 | 0.97651117 | 5.51E-119 | 1.01E-114 | 0.728 | 0.266 |
| RCN3     | 9 | 0.97166418 | 1.53E-155 | 2.79E-151 | 0.872 | 0.364 |
| COL6A2   | 9 | 0.95816482 | 2.44E-115 | 4.45E-111 | 0.948 | 0.61  |
| PDIA6    | 9 | 0.9496385  | 1.51E-132 | 2.75E-128 | 0.969 | 0.661 |
| PPIC     | 9 | 0.94323671 | 2.72E-129 | 4.96E-125 | 0.911 | 0.463 |
| SCRG1    | 9 | 0.9412399  | 2.48E-79  | 4.52E-75  | 0.987 | 0.975 |
| EFEMP2   | 9 | 0.94095148 | 6.76E-168 | 1.23E-163 | 0.922 | 0.411 |
| PRDX4    | 9 | 0.93109269 | 4.33E-138 | 7.89E-134 | 0.977 | 0.757 |
| P4HB     | 9 | 0.92382557 | 6.28E-120 | 1.15E-115 | 0.99  | 0.811 |
| GRN      | 9 | 0.92198316 | 4.05E-167 | 7.40E-163 | 0.885 | 0.342 |
| COL5A2   | 9 | 0.91863754 | 3.04E-127 | 5.55E-123 | 0.88  | 0.398 |
| TUBA1B   | 9 | 0.91334153 | 4.35E-73  | 7.94E-69  | 0.7   | 0.343 |
| P4HA2    | 9 | 0.89072144 | 1.25E-139 | 2.28E-135 | 0.862 | 0.388 |
| SERPINA5 | 9 | 0.88761355 | 2.16E-79  | 3.95E-75  | 0.838 | 0.521 |
| CYP1B1   | 9 | 0.8875924  | 1.75E-51  | 3.18E-47  | 0.405 | 0.144 |
| ANGPTL4  | 9 | 0.88486816 | 8.20E-72  | 1.50E-67  | 0.564 | 0.212 |
| CYTL1    | 9 | 0.87930223 | 9.59E-57  | 1.75E-52  | 0.499 | 0.193 |
| ACTB     | 9 | 0.87442494 | 2.95E-70  | 5.38E-66  | 0.987 | 0.944 |
| SERPINH1 | 9 | 0.86290134 | 3.48E-177 | 6.36E-173 | 0.645 | 0.144 |
| HAPLN1   | 9 | 0.85776999 | 2.33E-76  | 4.26E-72  | 0.901 | 0.622 |
| CTHRC1   | 9 | 0.85281808 | 1.46E-54  | 2.66E-50  | 0.582 | 0.271 |
| TIMP1    | 9 | 0.85127395 | 1.39E-79  | 2.54E-75  | 0.997 | 0.997 |
| PRDX1    | 9 | 0.84924221 | 1.55E-119 | 2.83E-115 | 0.979 | 0.827 |
| COL6A1   | 9 | 0.84329881 | 1.51E-101 | 2.76E-97  | 0.869 | 0.466 |
| CD63     | 9 | 0.84262554 | 3.41E-145 | 6.23E-141 | 1     | 0.999 |
| ATP6AP2  | 9 | 0.83927228 | 8.12E-158 | 1.48E-153 | 0.862 | 0.338 |
| MAGED1   | 9 | 0.83704951 | 4.45E-94  | 8.13E-90  | 0.668 | 0.245 |
| CTSD     | 9 | 0.83083019 | 7.99E-69  | 1.46E-64  | 0.974 | 0.892 |
| HTRA1    | 9 | 0.82799442 | 2.30E-112 | 4.19E-108 | 0.958 | 0.788 |
| AEBP1    | 9 | 0.82048501 | 3.96E-78  | 7.22E-74  | 0.89  | 0.594 |
| PLOD2    | 9 | 0.81525916 | 4.72E-111 | 8.61E-107 | 0.961 | 0.743 |
| SERPINE2 | 9 | 0.80076998 | 3.89E-53  | 7.09E-49  | 1     | 0.995 |

|         |   |            |           |           |       |       |
|---------|---|------------|-----------|-----------|-------|-------|
| LOXL3   | 9 | 0.80017938 | 2.21E-257 | 4.03E-253 | 0.734 | 0.133 |
| CNN3    | 9 | 0.79482717 | 1.54E-137 | 2.81E-133 | 0.815 | 0.309 |
| LMNA    | 9 | 0.79334994 | 1.58E-110 | 2.89E-106 | 0.77  | 0.311 |
| CRYAB   | 9 | 0.7882128  | 8.52E-49  | 1.55E-44  | 0.93  | 0.754 |
| COL9A3  | 9 | 0.783399   | 1.09E-27  | 1.99E-23  | 0.749 | 0.627 |
| MAGED2  | 9 | 0.7797176  | 6.37E-107 | 1.16E-102 | 0.869 | 0.465 |
| SMOC1   | 9 | 0.77920663 | 1.15E-111 | 2.11E-107 | 0.695 | 0.251 |
| COMP    | 9 | 0.77438647 | 1.54E-39  | 2.81E-35  | 0.903 | 0.806 |
| ID1     | 9 | 0.76815385 | 4.84E-50  | 8.84E-46  | 0.867 | 0.597 |
| SAA1    | 9 | 0.76109357 | 1.88E-14  | 3.42E-10  | 0.159 | 0.063 |
| FHL1    | 9 | 0.76043707 | 1.82E-39  | 3.32E-35  | 0.666 | 0.429 |
| CALU    | 9 | 0.7592452  | 1.51E-94  | 2.76E-90  | 0.914 | 0.576 |
| NUCB2   | 9 | 0.75807496 | 1.24E-82  | 2.26E-78  | 0.812 | 0.442 |
| COL11A1 | 9 | 0.756791   | 9.32E-73  | 1.70E-68  | 0.95  | 0.715 |
| TUBB2A  | 9 | 0.74975842 | 1.16E-97  | 2.11E-93  | 0.616 | 0.208 |
| LAPTM4A | 9 | 0.74327808 | 1.54E-122 | 2.80E-118 | 1     | 0.947 |
| VKORC1  | 9 | 0.7426738  | 2.90E-111 | 5.29E-107 | 0.997 | 0.949 |
| ITM2B   | 9 | 0.74217333 | 8.05E-117 | 1.47E-112 | 1     | 0.972 |
| PDIA4   | 9 | 0.73744378 | 1.25E-125 | 2.29E-121 | 0.825 | 0.353 |
| TPM2    | 9 | 0.73725097 | 3.04E-84  | 5.55E-80  | 0.903 | 0.563 |
| ID3     | 9 | 0.71782399 | 4.12E-49  | 7.51E-45  | 0.843 | 0.565 |
| FKBP10  | 9 | 0.7137458  | 7.39E-99  | 1.35E-94  | 0.864 | 0.469 |
| S100A10 | 9 | 0.71363135 | 5.84E-86  | 1.06E-81  | 1     | 0.98  |
| MYDGF   | 9 | 0.71250114 | 2.11E-86  | 3.84E-82  | 0.961 | 0.772 |
| S100A11 | 9 | 0.70338198 | 2.29E-99  | 4.17E-95  | 0.997 | 0.917 |
| ECM1    | 9 | 0.70016153 | 2.17E-187 | 3.96E-183 | 0.634 | 0.135 |
| PDGFRL  | 9 | 0.69870045 | 1.88E-188 | 3.43E-184 | 0.637 | 0.132 |
| TMED9   | 9 | 0.69738023 | 1.68E-95  | 3.06E-91  | 0.94  | 0.615 |
| CFL1    | 9 | 0.69272678 | 3.72E-66  | 6.80E-62  | 0.948 | 0.768 |
| ANXA1   | 9 | 0.69025999 | 4.81E-85  | 8.78E-81  | 0.961 | 0.733 |
| ITM2C   | 9 | 0.68653707 | 6.61E-71  | 1.21E-66  | 0.88  | 0.545 |
| TPI1    | 9 | 0.68238132 | 9.54E-122 | 1.74E-117 | 1     | 0.989 |
| CD151   | 9 | 0.67835646 | 8.85E-78  | 1.62E-73  | 0.828 | 0.48  |
| SDC2    | 9 | 0.67526548 | 1.16E-72  | 2.11E-68  | 0.956 | 0.825 |
| FSTL1   | 9 | 0.67508792 | 1.17E-116 | 2.14E-112 | 0.807 | 0.338 |
| RCN2    | 9 | 0.66454623 | 2.89E-87  | 5.27E-83  | 0.922 | 0.641 |
| LMAN2   | 9 | 0.65810673 | 1.28E-102 | 2.34E-98  | 0.859 | 0.433 |
| GGH     | 9 | 0.65437227 | 2.06E-178 | 3.75E-174 | 0.593 | 0.119 |
| CTSA    | 9 | 0.64268201 | 1.29E-124 | 2.36E-120 | 0.684 | 0.222 |

|         |   |            |           |           |       |       |
|---------|---|------------|-----------|-----------|-------|-------|
| C1S     | 9 | 0.64203276 | 2.40E-57  | 4.39E-53  | 0.851 | 0.613 |
| SRGN    | 9 | 0.63305985 | 4.18E-63  | 7.63E-59  | 0.585 | 0.253 |
| LMAN1   | 9 | 0.63305877 | 7.82E-89  | 1.43E-84  | 0.749 | 0.336 |
| BSG     | 9 | 0.63287823 | 4.70E-93  | 8.57E-89  | 0.95  | 0.684 |
| TMSB4X  | 9 | 0.62762121 | 1.63E-41  | 2.97E-37  | 0.922 | 0.767 |
| DDOST   | 9 | 0.62713928 | 3.88E-98  | 7.08E-94  | 0.817 | 0.394 |
| MATN4   | 9 | 0.62616489 | 5.71E-09  | 1.04E-04  | 0.292 | 0.184 |
| ISLR    | 9 | 0.62539538 | 1.17E-70  | 2.14E-66  | 0.843 | 0.466 |
| SLC16A3 | 9 | 0.6240932  | 1.03E-80  | 1.88E-76  | 0.843 | 0.464 |
| RTN4    | 9 | 0.62331263 | 8.47E-69  | 1.54E-64  | 0.909 | 0.633 |
| FDPS    | 9 | 0.62271192 | 8.72E-66  | 1.59E-61  | 0.559 | 0.225 |
| COL9A2  | 9 | 0.62205571 | 3.29E-44  | 6.01E-40  | 0.653 | 0.368 |
| TMBIM6  | 9 | 0.61902825 | 1.61E-73  | 2.94E-69  | 0.922 | 0.693 |
| HLA-A   | 9 | 0.61826427 | 1.09E-84  | 1.99E-80  | 0.995 | 0.885 |
| CD59    | 9 | 0.61462107 | 7.25E-77  | 1.32E-72  | 0.984 | 0.939 |
| MSMO1   | 9 | 0.61148298 | 6.23E-50  | 1.14E-45  | 0.58  | 0.275 |
| ITM2A   | 9 | 0.60719034 | 3.05E-46  | 5.56E-42  | 0.794 | 0.517 |
| LAMP1   | 9 | 0.60417048 | 2.89E-86  | 5.27E-82  | 0.82  | 0.431 |
| TSPAN4  | 9 | 0.60358318 | 3.28E-81  | 5.98E-77  | 0.851 | 0.468 |
| P3H1    | 9 | 0.60246779 | 2.33E-207 | 4.25E-203 | 0.606 | 0.107 |
| MYL6    | 9 | 0.60011366 | 1.51E-74  | 2.76E-70  | 0.984 | 0.929 |
| NNMT    | 9 | 0.59981818 | 2.23E-45  | 4.07E-41  | 0.966 | 0.885 |
| P4HA1   | 9 | 0.59967065 | 2.90E-72  | 5.29E-68  | 0.914 | 0.657 |
| VIM     | 9 | 0.59118928 | 9.45E-44  | 1.73E-39  | 1     | 0.999 |
| INSIG1  | 9 | 0.58949783 | 3.34E-31  | 6.10E-27  | 0.653 | 0.415 |
| GSN     | 9 | 0.58799482 | 1.77E-68  | 3.22E-64  | 0.856 | 0.501 |
| DDIT4   | 9 | 0.58624296 | 9.58E-11  | 1.75E-06  | 0.582 | 0.469 |
| POLR2L  | 9 | 0.58180459 | 4.25E-76  | 7.76E-72  | 0.99  | 0.854 |
| IGFBP3  | 9 | 0.57994581 | 2.25E-18  | 4.11E-14  | 0.499 | 0.309 |
| FKBP11  | 9 | 0.57874575 | 5.04E-99  | 9.19E-95  | 0.603 | 0.198 |
| CKAP4   | 9 | 0.57106346 | 7.61E-71  | 1.39E-66  | 0.676 | 0.307 |
| THBS1   | 9 | 0.57005255 | 6.61E-89  | 1.21E-84  | 0.402 | 0.096 |
| HLA-C   | 9 | 0.57003828 | 8.41E-71  | 1.54E-66  | 0.984 | 0.87  |
| OSTC    | 9 | 0.5687268  | 5.51E-72  | 1.01E-67  | 0.956 | 0.805 |
| PAPSS1  | 9 | 0.56841941 | 6.19E-86  | 1.13E-81  | 0.663 | 0.268 |
| POSTN   | 9 | 0.56694883 | 2.07E-44  | 3.77E-40  | 0.157 | 0.029 |
| MYL12B  | 9 | 0.56628009 | 8.15E-66  | 1.49E-61  | 0.872 | 0.603 |
| LAMP2   | 9 | 0.56611734 | 1.50E-78  | 2.75E-74  | 0.825 | 0.451 |
| CALD1   | 9 | 0.5646103  | 8.50E-51  | 1.55E-46  | 0.838 | 0.556 |

|         |   |            |           |           |       |       |
|---------|---|------------|-----------|-----------|-------|-------|
| PFN1    | 9 | 0.56390716 | 2.65E-50  | 4.84E-46  | 0.966 | 0.877 |
| LOXL2   | 9 | 0.56326071 | 4.93E-173 | 8.99E-169 | 0.533 | 0.096 |
| LSP1    | 9 | 0.56289758 | 8.16E-80  | 1.49E-75  | 0.749 | 0.331 |
| PRKCDBP | 9 | 0.56012959 | 2.23E-65  | 4.08E-61  | 0.812 | 0.477 |
| PLD3    | 9 | 0.55541664 | 2.52E-62  | 4.60E-58  | 0.836 | 0.52  |
| COL8A1  | 9 | 0.552282   | 3.25E-100 | 5.93E-96  | 0.334 | 0.061 |
| SNAPC1  | 9 | 0.55184592 | 1.02E-49  | 1.86E-45  | 0.768 | 0.466 |
| PGAM1   | 9 | 0.55101854 | 2.95E-68  | 5.39E-64  | 0.953 | 0.782 |
| PRELP   | 9 | 0.54953702 | 2.72E-34  | 4.97E-30  | 0.963 | 0.925 |
| CRIP1   | 9 | 0.5440258  | 4.25E-48  | 7.76E-44  | 0.642 | 0.331 |
| TUBB2B  | 9 | 0.5435861  | 1.63E-10  | 2.98E-06  | 0.522 | 0.417 |
| ARF4    | 9 | 0.542646   | 1.53E-64  | 2.79E-60  | 0.922 | 0.723 |
| OAT     | 9 | 0.54124662 | 2.12E-93  | 3.86E-89  | 0.742 | 0.304 |
| ERP44   | 9 | 0.53845576 | 2.88E-100 | 5.25E-96  | 0.71  | 0.269 |
| LRPAP1  | 9 | 0.53780886 | 1.47E-66  | 2.69E-62  | 0.833 | 0.514 |
| PCOLCE2 | 9 | 0.53534259 | 4.87E-57  | 8.89E-53  | 0.982 | 0.903 |
| SIL1    | 9 | 0.53332484 | 6.47E-83  | 1.18E-78  | 0.697 | 0.292 |
| C5orf15 | 9 | 0.53325624 | 7.16E-87  | 1.31E-82  | 0.794 | 0.375 |
| MORF4L2 | 9 | 0.53052558 | 4.87E-57  | 8.88E-53  | 0.885 | 0.646 |
| KDEL3   | 9 | 0.52977894 | 8.93E-82  | 1.63E-77  | 0.679 | 0.271 |
| CITED2  | 9 | 0.52751108 | 3.87E-18  | 7.06E-14  | 0.614 | 0.426 |
| APLP2   | 9 | 0.5255246  | 4.33E-68  | 7.90E-64  | 0.71  | 0.353 |
| HLA-B   | 9 | 0.52181109 | 2.22E-46  | 4.04E-42  | 0.916 | 0.774 |
| SERF2   | 9 | 0.52103338 | 1.09E-78  | 1.98E-74  | 1     | 1     |
| DOK1    | 9 | 0.52047417 | 1.86E-68  | 3.39E-64  | 0.525 | 0.187 |
| MFGE8   | 9 | 0.5188582  | 1.66E-29  | 3.03E-25  | 0.919 | 0.822 |
| ATP5J2  | 9 | 0.51823849 | 7.27E-60  | 1.33E-55  | 0.822 | 0.534 |
| PSMA4   | 9 | 0.51542795 | 6.54E-61  | 1.19E-56  | 0.721 | 0.399 |
| RCAN1   | 9 | 0.51449302 | 1.62E-62  | 2.96E-58  | 0.345 | 0.092 |
| PPIA    | 9 | 0.51431267 | 4.44E-69  | 8.10E-65  | 0.997 | 0.959 |
| SCARB2  | 9 | 0.51389104 | 4.94E-66  | 9.01E-62  | 0.789 | 0.45  |
| COL6A3  | 9 | 0.51262715 | 7.91E-46  | 1.44E-41  | 0.653 | 0.342 |
| IGFBP6  | 9 | 0.51184978 | 8.57E-34  | 1.56E-29  | 0.849 | 0.641 |
| PLOD1   | 9 | 0.51167862 | 1.27E-64  | 2.31E-60  | 0.734 | 0.384 |
| RCN1    | 9 | 0.51140628 | 2.05E-58  | 3.75E-54  | 0.765 | 0.44  |
| HERPUD1 | 9 | 0.50900801 | 1.48E-42  | 2.70E-38  | 0.755 | 0.484 |
| CD99    | 9 | 0.50826292 | 4.99E-68  | 9.10E-64  | 0.992 | 0.924 |
| MDH1    | 9 | 0.50715739 | 7.68E-85  | 1.40E-80  | 0.692 | 0.287 |
| P3H2    | 9 | 0.50661283 | 3.81E-64  | 6.94E-60  | 0.603 | 0.255 |

|           |   |            |          |          |       |       |
|-----------|---|------------|----------|----------|-------|-------|
| CRELD2    | 9 | 0.50619694 | 6.41E-88 | 1.17E-83 | 0.627 | 0.22  |
| SSR4      | 9 | 0.50454308 | 5.73E-73 | 1.04E-68 | 0.997 | 0.958 |
| SQLE      | 9 | 0.50389408 | 8.50E-61 | 1.55E-56 | 0.522 | 0.203 |
| SNAI2     | 9 | 0.50238488 | 6.75E-38 | 1.23E-33 | 0.781 | 0.5   |
| PRDX2     | 9 | 0.50055244 | 4.48E-53 | 8.18E-49 | 0.911 | 0.702 |
| TMED10    | 9 | 0.49981646 | 5.59E-68 | 1.02E-63 | 0.969 | 0.868 |
| TMSB10    | 9 | 0.49758232 | 4.38E-36 | 7.99E-32 | 0.995 | 0.988 |
| NREP      | 9 | 0.4958283  | 4.40E-71 | 8.03E-67 | 0.627 | 0.247 |
| CCPG1     | 9 | 0.49526845 | 5.31E-49 | 9.68E-45 | 0.773 | 0.477 |
| CAPG      | 9 | 0.49431729 | 8.41E-44 | 1.53E-39 | 0.661 | 0.377 |
| YIF1A     | 9 | 0.49398626 | 2.42E-55 | 4.41E-51 | 0.755 | 0.428 |
| SGCB      | 9 | 0.4931985  | 2.19E-57 | 3.99E-53 | 0.739 | 0.411 |
| KDELR2    | 9 | 0.49113048 | 1.21E-52 | 2.21E-48 | 0.969 | 0.856 |
| CD164     | 9 | 0.49075605 | 1.66E-64 | 3.02E-60 | 0.916 | 0.671 |
| CYBA      | 9 | 0.49044221 | 1.67E-44 | 3.04E-40 | 0.794 | 0.558 |
| DNAJB11   | 9 | 0.48999234 | 5.52E-63 | 1.01E-58 | 0.569 | 0.239 |
| GPX8      | 9 | 0.48842541 | 1.27E-62 | 2.31E-58 | 0.634 | 0.289 |
| ATP5B     | 9 | 0.48637181 | 5.12E-58 | 9.34E-54 | 0.755 | 0.419 |
| LINC00152 | 9 | 0.48539753 | 1.94E-38 | 3.53E-34 | 0.642 | 0.348 |
| TMEM59    | 9 | 0.48502788 | 4.12E-70 | 7.51E-66 | 0.997 | 0.97  |
| P3H4      | 9 | 0.47989847 | 3.64E-97 | 6.64E-93 | 0.572 | 0.173 |
| AP2M1     | 9 | 0.47851845 | 1.96E-51 | 3.58E-47 | 0.849 | 0.548 |
| HEXB      | 9 | 0.47687707 | 1.70E-58 | 3.10E-54 | 0.796 | 0.451 |
| RNH1      | 9 | 0.47540391 | 1.36E-44 | 2.49E-40 | 0.807 | 0.532 |
| RABAC1    | 9 | 0.47527432 | 1.23E-58 | 2.24E-54 | 0.937 | 0.823 |
| PSMB3     | 9 | 0.47518375 | 5.23E-71 | 9.54E-67 | 0.744 | 0.356 |
| COL11A2   | 9 | 0.47293189 | 1.16E-20 | 2.11E-16 | 0.642 | 0.498 |
| NME1      | 9 | 0.47051643 | 9.36E-60 | 1.71E-55 | 0.608 | 0.268 |
| RBX1      | 9 | 0.46882354 | 6.25E-53 | 1.14E-48 | 0.838 | 0.568 |
| MYL12A    | 9 | 0.46580936 | 4.38E-46 | 7.99E-42 | 0.815 | 0.552 |
| TNC       | 9 | 0.46489668 | 3.20E-69 | 5.84E-65 | 0.345 | 0.086 |
| ZFP36L1   | 9 | 0.46124797 | 3.13E-32 | 5.71E-28 | 0.627 | 0.363 |
| TMED3     | 9 | 0.46078392 | 2.42E-55 | 4.42E-51 | 0.828 | 0.49  |
| FAP       | 9 | 0.45674469 | 7.36E-61 | 1.34E-56 | 0.572 | 0.232 |
| ATP1B3    | 9 | 0.45531632 | 7.11E-59 | 1.30E-54 | 0.655 | 0.308 |
| PLOD3     | 9 | 0.45504894 | 7.23E-94 | 1.32E-89 | 0.564 | 0.174 |
| FSCN1     | 9 | 0.45427129 | 8.38E-93 | 1.53E-88 | 0.522 | 0.152 |
| VCAN      | 9 | 0.44923025 | 1.69E-32 | 3.08E-28 | 0.7   | 0.43  |
| TMED2     | 9 | 0.44780665 | 1.47E-56 | 2.67E-52 | 0.961 | 0.823 |



|          |   |            |           |           |       |       |
|----------|---|------------|-----------|-----------|-------|-------|
| LOXL1    | 9 | 0.44519959 | 1.07E-98  | 1.94E-94  | 0.347 | 0.065 |
| MGST3    | 9 | 0.44330415 | 4.17E-53  | 7.61E-49  | 0.903 | 0.654 |
| PIGT     | 9 | 0.44304402 | 1.09E-77  | 1.99E-73  | 0.653 | 0.254 |
| ITGBL1   | 9 | 0.44286771 | 1.46E-88  | 2.66E-84  | 0.46  | 0.123 |
| PTTG1IP  | 9 | 0.44242547 | 2.32E-39  | 4.22E-35  | 0.734 | 0.467 |
| NOV      | 9 | 0.44013254 | 1.41E-31  | 2.58E-27  | 0.201 | 0.058 |
| COL5A1   | 9 | 0.43862326 | 6.63E-86  | 1.21E-81  | 0.556 | 0.173 |
| EMILIN1  | 9 | 0.43829483 | 9.70E-94  | 1.77E-89  | 0.527 | 0.151 |
| IGFBP4   | 9 | 0.43479411 | 2.48E-42  | 4.52E-38  | 0.373 | 0.133 |
| CPQ      | 9 | 0.43350077 | 2.05E-50  | 3.74E-46  | 0.611 | 0.308 |
| IFITM3   | 9 | 0.43134791 | 9.07E-42  | 1.66E-37  | 0.956 | 0.868 |
| ARPC1B   | 9 | 0.43059038 | 4.42E-38  | 8.07E-34  | 0.744 | 0.471 |
| PDIA5    | 9 | 0.42977762 | 1.13E-134 | 2.06E-130 | 0.415 | 0.073 |
| RRBP1    | 9 | 0.42922589 | 6.18E-49  | 1.13E-44  | 0.739 | 0.41  |
| TPM4     | 9 | 0.42896612 | 6.62E-45  | 1.21E-40  | 0.574 | 0.282 |
| ANGPTL5  | 9 | 0.4279155  | 1.53E-39  | 2.79E-35  | 0.538 | 0.269 |
| DAD1     | 9 | 0.42785804 | 6.04E-49  | 1.10E-44  | 0.903 | 0.709 |
| ATRAID   | 9 | 0.42722763 | 6.63E-47  | 1.21E-42  | 0.961 | 0.833 |
| TSPO     | 9 | 0.42406755 | 4.49E-45  | 8.20E-41  | 0.956 | 0.817 |
| CTSK     | 9 | 0.42359838 | 3.82E-51  | 6.97E-47  | 0.611 | 0.29  |
| DKK3     | 9 | 0.42337301 | 6.93E-68  | 1.26E-63  | 0.493 | 0.165 |
| SMOC2    | 9 | 0.42288935 | 3.07E-52  | 5.60E-48  | 0.366 | 0.116 |
| CPE      | 9 | 0.42227266 | 2.24E-20  | 4.08E-16  | 0.778 | 0.657 |
| HCFC1R1  | 9 | 0.42155892 | 8.00E-39  | 1.46E-34  | 0.909 | 0.665 |
| EIF5A    | 9 | 0.42090615 | 8.30E-42  | 1.51E-37  | 0.812 | 0.559 |
| DSTN     | 9 | 0.42054087 | 1.40E-48  | 2.55E-44  | 1     | 0.997 |
| MANF     | 9 | 0.41931345 | 7.27E-42  | 1.33E-37  | 0.619 | 0.328 |
| DPT      | 9 | 0.41896294 | 5.81E-97  | 1.06E-92  | 0.326 | 0.06  |
| FAM114A1 | 9 | 0.41709311 | 9.01E-42  | 1.64E-37  | 0.611 | 0.332 |
| SEC13    | 9 | 0.4167692  | 9.86E-81  | 1.80E-76  | 0.548 | 0.182 |
| ENG      | 9 | 0.41482187 | 2.13E-105 | 3.89E-101 | 0.431 | 0.094 |
| RBP4     | 9 | 0.41460502 | 5.34E-24  | 9.74E-20  | 0.883 | 0.735 |
| CNPY2    | 9 | 0.41100421 | 1.68E-41  | 3.07E-37  | 0.883 | 0.638 |
| CFD      | 9 | 0.41055426 | 1.24E-13  | 2.26E-09  | 0.256 | 0.131 |
| PIGK     | 9 | 0.41005854 | 4.17E-75  | 7.61E-71  | 0.574 | 0.206 |
| ATPIF1   | 9 | 0.40917136 | 6.34E-38  | 1.16E-33  | 0.862 | 0.68  |
| TRAPPC1  | 9 | 0.40847615 | 1.82E-52  | 3.31E-48  | 0.796 | 0.445 |
| NQO1     | 9 | 0.4080931  | 5.34E-46  | 9.74E-42  | 0.311 | 0.096 |
| C2orf40  | 9 | 0.40735259 | 1.31E-12  | 2.39E-08  | 0.937 | 0.967 |

|             |   |            |          |          |       |       |
|-------------|---|------------|----------|----------|-------|-------|
| TALDO1      | 9 | 0.40728328 | 5.69E-43 | 1.04E-38 | 0.778 | 0.477 |
| TUBB        | 9 | 0.40535831 | 6.23E-17 | 1.14E-12 | 0.896 | 0.798 |
| DCN         | 9 | 0.40534937 | 5.64E-21 | 1.03E-16 | 1     | 0.998 |
| HIF1A       | 9 | 0.40489401 | 1.20E-27 | 2.18E-23 | 0.919 | 0.807 |
| MXRA8       | 9 | 0.40450733 | 1.49E-55 | 2.72E-51 | 0.564 | 0.241 |
| PPP1R3C     | 9 | 0.40337785 | 3.30E-23 | 6.03E-19 | 0.629 | 0.426 |
| IDI1        | 9 | 0.40180246 | 8.28E-27 | 1.51E-22 | 0.514 | 0.292 |
| CYB5R3      | 9 | 0.4008989  | 1.92E-41 | 3.50E-37 | 0.88  | 0.651 |
| FBXO2       | 9 | 0.40082805 | 5.51E-17 | 1.01E-12 | 0.807 | 0.74  |
| TUBA1A      | 9 | 0.39784535 | 6.72E-37 | 1.23E-32 | 0.426 | 0.184 |
| MARCKS      | 9 | 0.39583767 | 2.44E-53 | 4.45E-49 | 0.376 | 0.12  |
| NDUFA13     | 9 | 0.39516984 | 8.91E-42 | 1.63E-37 | 0.849 | 0.625 |
| ARL6IP5     | 9 | 0.39437411 | 8.20E-40 | 1.50E-35 | 0.836 | 0.596 |
| FKBP7       | 9 | 0.39419466 | 2.92E-56 | 5.33E-52 | 0.538 | 0.22  |
| EIF4A1      | 9 | 0.39408774 | 3.16E-33 | 5.76E-29 | 0.614 | 0.366 |
| PTRF        | 9 | 0.39337967 | 3.99E-34 | 7.28E-30 | 0.76  | 0.494 |
| GPAA1       | 9 | 0.39289076 | 8.25E-47 | 1.51E-42 | 0.658 | 0.356 |
| HNRNPA2B1   | 9 | 0.39285958 | 1.94E-37 | 3.55E-33 | 0.82  | 0.567 |
| TECR        | 9 | 0.39238851 | 1.17E-42 | 2.14E-38 | 0.676 | 0.389 |
| NUCB1       | 9 | 0.39150462 | 6.97E-41 | 1.27E-36 | 0.833 | 0.566 |
| IFI6        | 9 | 0.39127921 | 3.31E-31 | 6.03E-27 | 0.58  | 0.318 |
| HSPA8       | 9 | 0.39071329 | 9.71E-24 | 1.77E-19 | 0.666 | 0.454 |
| NDN         | 9 | 0.3900415  | 3.65E-54 | 6.66E-50 | 0.634 | 0.299 |
| IFITM10     | 9 | 0.38853488 | 2.66E-58 | 4.86E-54 | 0.543 | 0.214 |
| CD9         | 9 | 0.38824879 | 4.37E-27 | 7.98E-23 | 0.755 | 0.513 |
| CALM2       | 9 | 0.38821424 | 1.62E-42 | 2.96E-38 | 0.995 | 0.967 |
| SCPEP1      | 9 | 0.38794889 | 2.08E-58 | 3.79E-54 | 0.58  | 0.245 |
| AXL         | 9 | 0.38784822 | 3.33E-23 | 6.08E-19 | 0.559 | 0.337 |
| GAPDH       | 9 | 0.38759285 | 1.12E-57 | 2.04E-53 | 1     | 1     |
| HNRNPK      | 9 | 0.38688885 | 4.40E-43 | 8.04E-39 | 0.924 | 0.722 |
| ACADVL      | 9 | 0.38584844 | 1.35E-50 | 2.46E-46 | 0.603 | 0.283 |
| TM9SF2      | 9 | 0.38375236 | 5.17E-51 | 9.43E-47 | 0.582 | 0.274 |
| PSMB1       | 9 | 0.38337917 | 8.25E-44 | 1.50E-39 | 0.901 | 0.69  |
| FIBIN       | 9 | 0.3827324  | 9.98E-69 | 1.82E-64 | 0.339 | 0.084 |
| MALL        | 9 | 0.380998   | 7.91E-35 | 1.44E-30 | 0.538 | 0.268 |
| MIR4435-2HG | 9 | 0.3806803  | 1.07E-45 | 1.95E-41 | 0.525 | 0.226 |
| DNM3OS      | 9 | 0.38059614 | 8.29E-38 | 1.51E-33 | 0.655 | 0.358 |
| PLAC9       | 9 | 0.37947509 | 6.73E-21 | 1.23E-16 | 0.922 | 0.798 |
| C12orf75    | 9 | 0.37947429 | 1.39E-45 | 2.53E-41 | 0.439 | 0.166 |

|          |   |            |           |           |       |       |
|----------|---|------------|-----------|-----------|-------|-------|
| YWHAB    | 9 | 0.379088   | 1.80E-36  | 3.28E-32  | 0.65  | 0.386 |
| WBP5     | 9 | 0.37778846 | 2.72E-36  | 4.96E-32  | 0.922 | 0.742 |
| PTN      | 9 | 0.3760107  | 1.74E-127 | 3.17E-123 | 0.319 | 0.044 |
| SPPL2A   | 9 | 0.37582982 | 2.58E-55  | 4.71E-51  | 0.645 | 0.3   |
| HSP90AA1 | 9 | 0.37338235 | 1.53E-27  | 2.78E-23  | 0.875 | 0.744 |
| LGMN     | 9 | 0.37226837 | 4.68E-72  | 8.54E-68  | 0.493 | 0.16  |
| CHID1    | 9 | 0.37189078 | 2.38E-39  | 4.35E-35  | 0.809 | 0.538 |
| PSMB6    | 9 | 0.37035921 | 2.72E-37  | 4.96E-33  | 0.755 | 0.485 |
| SRSF2    | 9 | 0.37028741 | 1.66E-34  | 3.03E-30  | 0.671 | 0.414 |
| UGP2     | 9 | 0.36962073 | 1.82E-28  | 3.32E-24  | 0.807 | 0.619 |
| PHGDH    | 9 | 0.36905504 | 1.07E-43  | 1.94E-39  | 0.352 | 0.124 |
| TUSC3    | 9 | 0.36721736 | 1.52E-42  | 2.77E-38  | 0.501 | 0.229 |
| IKBIP    | 9 | 0.3665808  | 6.25E-50  | 1.14E-45  | 0.585 | 0.265 |
| STMN1    | 9 | 0.36487299 | 1.89E-22  | 3.45E-18  | 0.206 | 0.074 |
| COPE     | 9 | 0.36483046 | 1.23E-36  | 2.25E-32  | 0.809 | 0.557 |
| SORBS2   | 9 | 0.36363631 | 8.85E-17  | 1.62E-12  | 0.24  | 0.11  |
| ATP5G1   | 9 | 0.36202117 | 9.27E-39  | 1.69E-34  | 0.7   | 0.424 |
| MYL9     | 9 | 0.36193872 | 2.93E-48  | 5.35E-44  | 0.512 | 0.216 |
| MLEC     | 9 | 0.36152602 | 3.18E-39  | 5.80E-35  | 0.681 | 0.396 |
| VCP      | 9 | 0.36111739 | 2.87E-49  | 5.24E-45  | 0.501 | 0.209 |
| SSR1     | 9 | 0.36024625 | 1.06E-32  | 1.93E-28  | 0.77  | 0.513 |
| DUSP14   | 9 | 0.3597761  | 9.65E-49  | 1.76E-44  | 0.473 | 0.188 |
| SRM      | 9 | 0.35976937 | 1.71E-31  | 3.11E-27  | 0.608 | 0.367 |
| PPP1CA   | 9 | 0.35916782 | 3.75E-44  | 6.84E-40  | 0.608 | 0.305 |
| FDFT1    | 9 | 0.35910699 | 1.79E-30  | 3.26E-26  | 0.499 | 0.263 |
| FBLN1    | 9 | 0.35908748 | 9.15E-146 | 1.67E-141 | 0.308 | 0.037 |
| SERPING1 | 9 | 0.35842374 | 5.52E-18  | 1.01E-13  | 0.684 | 0.53  |
| RPN1     | 9 | 0.35790335 | 2.38E-57  | 4.34E-53  | 0.52  | 0.202 |
| EXT2     | 9 | 0.3577441  | 1.70E-66  | 3.09E-62  | 0.473 | 0.156 |
| BCAP31   | 9 | 0.35753419 | 4.51E-41  | 8.23E-37  | 0.715 | 0.422 |
| MRPL13   | 9 | 0.35714268 | 4.95E-93  | 9.03E-89  | 0.47  | 0.122 |
| PDGFRA   | 9 | 0.35617773 | 2.84E-43  | 5.17E-39  | 0.567 | 0.263 |
| P3H3     | 9 | 0.35602223 | 6.14E-56  | 1.12E-51  | 0.493 | 0.189 |
| QSOX1    | 9 | 0.35588519 | 6.03E-45  | 1.10E-40  | 0.642 | 0.321 |
| COPB2    | 9 | 0.35575077 | 1.52E-57  | 2.77E-53  | 0.54  | 0.216 |
| NDUFB2   | 9 | 0.35347138 | 2.30E-37  | 4.20E-33  | 0.922 | 0.768 |
| ARPC3    | 9 | 0.3528322  | 3.45E-37  | 6.30E-33  | 0.909 | 0.727 |
| SMPD1    | 9 | 0.35278825 | 2.33E-66  | 4.26E-62  | 0.488 | 0.164 |
| MTDH     | 9 | 0.35222064 | 4.83E-32  | 8.82E-28  | 0.849 | 0.648 |

|         |   |            |          |          |       |       |
|---------|---|------------|----------|----------|-------|-------|
| SRPX2   | 9 | 0.35221496 | 7.87E-80 | 1.44E-75 | 0.392 | 0.098 |
| FCGRT   | 9 | 0.35148569 | 2.18E-29 | 3.97E-25 | 0.796 | 0.568 |
| CBR1    | 9 | 0.35144687 | 1.72E-38 | 3.15E-34 | 0.556 | 0.284 |
| DBI     | 9 | 0.35133347 | 1.46E-23 | 2.66E-19 | 0.862 | 0.735 |
| MT-CYB  | 9 | 0.35130459 | 9.83E-22 | 1.79E-17 | 0.903 | 0.717 |
| UXS1    | 9 | 0.34911785 | 6.32E-60 | 1.15E-55 | 0.514 | 0.191 |
| RRAGA   | 9 | 0.34834357 | 3.34E-43 | 6.09E-39 | 0.653 | 0.344 |
| ANXA5   | 9 | 0.3480214  | 2.27E-33 | 4.14E-29 | 0.945 | 0.821 |
| FUCA2   | 9 | 0.34781199 | 2.83E-47 | 5.16E-43 | 0.493 | 0.208 |
| HMGB1   | 9 | 0.34726868 | 9.24E-22 | 1.69E-17 | 0.89  | 0.763 |
| INHBA   | 9 | 0.34624777 | 3.72E-20 | 6.79E-16 | 0.595 | 0.383 |
| GSTP1   | 9 | 0.34464055 | 6.91E-36 | 1.26E-31 | 0.984 | 0.954 |
| TMEM30A | 9 | 0.34442    | 2.13E-38 | 3.89E-34 | 0.689 | 0.405 |
| TXNDC15 | 9 | 0.34430545 | 2.82E-41 | 5.15E-37 | 0.627 | 0.326 |
| TBL1XR1 | 9 | 0.34289371 | 1.04E-28 | 1.90E-24 | 0.614 | 0.367 |
| HNRNPH2 | 9 | 0.34289031 | 1.86E-52 | 3.39E-48 | 0.517 | 0.212 |
| ATP6AP1 | 9 | 0.34266516 | 6.37E-52 | 1.16E-47 | 0.548 | 0.232 |
| ID4     | 9 | 0.34265848 | 8.37E-13 | 1.53E-08 | 0.695 | 0.542 |
| TUBB4B  | 9 | 0.34202958 | 3.21E-13 | 5.85E-09 | 0.59  | 0.44  |
| HEXA    | 9 | 0.34182597 | 1.94E-48 | 3.53E-44 | 0.621 | 0.299 |
| FMOD    | 9 | 0.34036346 | 3.89E-19 | 7.09E-15 | 0.94  | 0.887 |
| GNG11   | 9 | 0.34029302 | 1.05E-26 | 1.93E-22 | 0.499 | 0.269 |
| TXN     | 9 | 0.33977583 | 5.19E-23 | 9.48E-19 | 0.927 | 0.845 |
| 44446   | 9 | 0.33740019 | 2.31E-31 | 4.22E-27 | 0.789 | 0.537 |
| PPT1    | 9 | 0.33736547 | 1.25E-37 | 2.29E-33 | 0.687 | 0.397 |
| HMOX1   | 9 | 0.33724881 | 8.77E-15 | 1.60E-10 | 0.337 | 0.189 |
| LY6E    | 9 | 0.33712489 | 2.56E-30 | 4.68E-26 | 0.723 | 0.467 |
| C4orf48 | 9 | 0.33694669 | 1.79E-29 | 3.27E-25 | 0.616 | 0.361 |
| FHL2    | 9 | 0.33613836 | 1.07E-28 | 1.95E-24 | 0.41  | 0.191 |
| RDX     | 9 | 0.33577574 | 3.64E-27 | 6.64E-23 | 0.708 | 0.485 |
| SEPT2   | 9 | 0.33559135 | 1.27E-38 | 2.31E-34 | 0.614 | 0.333 |
| NT5E    | 9 | 0.33552108 | 1.31E-29 | 2.38E-25 | 0.624 | 0.359 |
| SCD     | 9 | 0.33549006 | 3.90E-27 | 7.12E-23 | 0.355 | 0.157 |
| CETN2   | 9 | 0.3354317  | 1.92E-41 | 3.50E-37 | 0.608 | 0.315 |
| TMEM45A | 9 | 0.33436357 | 5.23E-29 | 9.55E-25 | 0.943 | 0.811 |
| EMC7    | 9 | 0.33297303 | 2.76E-36 | 5.04E-32 | 0.671 | 0.394 |
| DNASE2  | 9 | 0.3321542  | 9.79E-55 | 1.79E-50 | 0.491 | 0.187 |
| ALDOA   | 9 | 0.33206334 | 2.40E-40 | 4.38E-36 | 0.997 | 0.995 |
| CLIC3   | 9 | 0.33148016 | 3.33E-33 | 6.07E-29 | 0.381 | 0.16  |

|           |   |            |           |           |       |       |
|-----------|---|------------|-----------|-----------|-------|-------|
| PSAT1     | 9 | 0.33062256 | 3.98E-50  | 7.25E-46  | 0.225 | 0.051 |
| CAPZB     | 9 | 0.3303814  | 1.02E-33  | 1.86E-29  | 0.692 | 0.427 |
| FKBP1A    | 9 | 0.32976455 | 5.26E-33  | 9.60E-29  | 0.744 | 0.488 |
| PODNL1    | 9 | 0.32965903 | 8.68E-43  | 1.58E-38  | 0.587 | 0.283 |
| XRCC6     | 9 | 0.32945223 | 4.26E-35  | 7.78E-31  | 0.642 | 0.365 |
| MAP1B     | 9 | 0.32868291 | 1.94E-47  | 3.54E-43  | 0.355 | 0.115 |
| WISP3     | 9 | 0.32819824 | 3.78E-57  | 6.90E-53  | 0.517 | 0.197 |
| SIX1      | 9 | 0.32814411 | 4.20E-36  | 7.67E-32  | 0.386 | 0.155 |
| C1GALT1C1 | 9 | 0.32752793 | 4.65E-117 | 8.49E-113 | 0.371 | 0.065 |
| MT-CO3    | 9 | 0.32654392 | 3.56E-22  | 6.49E-18  | 0.969 | 0.885 |
| GLT8D1    | 9 | 0.32646014 | 2.33E-56  | 4.25E-52  | 0.483 | 0.179 |
| CFH       | 9 | 0.32627637 | 2.91E-25  | 5.32E-21  | 0.418 | 0.207 |
| EDARADD   | 9 | 0.32608146 | 2.64E-74  | 4.82E-70  | 0.462 | 0.136 |
| TNFRSF1A  | 9 | 0.32589436 | 1.48E-26  | 2.70E-22  | 0.64  | 0.399 |
| HHIPL2    | 9 | 0.32557073 | 3.11E-60  | 5.68E-56  | 0.413 | 0.129 |
| PSMB5     | 9 | 0.32387592 | 1.53E-27  | 2.79E-23  | 0.791 | 0.588 |
| PRG4      | 9 | 0.32354949 | 1.88E-18  | 3.43E-14  | 0.514 | 0.312 |
| PYCR1     | 9 | 0.32312486 | 1.19E-54  | 2.17E-50  | 0.431 | 0.148 |
| GADD45B   | 9 | 0.32299554 | 3.30E-12  | 6.02E-08  | 0.418 | 0.266 |
| ATP5G3    | 9 | 0.32176084 | 1.49E-27  | 2.72E-23  | 0.843 | 0.686 |
| LDHA      | 9 | 0.32075031 | 1.24E-27  | 2.26E-23  | 1     | 0.998 |
| DDX5      | 9 | 0.32014982 | 6.69E-23  | 1.22E-18  | 0.755 | 0.583 |
| AP2S1     | 9 | 0.31931424 | 7.53E-24  | 1.37E-19  | 0.734 | 0.533 |
| EHD2      | 9 | 0.31930032 | 5.33E-50  | 9.73E-46  | 0.514 | 0.208 |
| DRAP1     | 9 | 0.31798049 | 3.92E-23  | 7.15E-19  | 0.781 | 0.586 |
| BGN       | 9 | 0.31753736 | 4.18E-31  | 7.63E-27  | 0.995 | 0.984 |
| HACD3     | 9 | 0.3162883  | 2.00E-48  | 3.65E-44  | 0.499 | 0.203 |
| ILK       | 9 | 0.31625234 | 1.29E-36  | 2.36E-32  | 0.564 | 0.295 |
| LTBP1     | 9 | 0.31588043 | 7.82E-41  | 1.43E-36  | 0.379 | 0.14  |
| ECM2      | 9 | 0.31540461 | 1.81E-38  | 3.29E-34  | 0.491 | 0.222 |
| EIF6      | 9 | 0.31478028 | 2.36E-33  | 4.30E-29  | 0.58  | 0.315 |
| SLC35B2   | 9 | 0.3145023  | 3.76E-49  | 6.86E-45  | 0.517 | 0.215 |
| TMEM165   | 9 | 0.31413783 | 8.26E-38  | 1.51E-33  | 0.645 | 0.351 |
| YIPF3     | 9 | 0.31402184 | 9.81E-34  | 1.79E-29  | 0.728 | 0.456 |
| OSBPL9    | 9 | 0.31353628 | 5.10E-30  | 9.30E-26  | 0.486 | 0.246 |
| GPC6      | 9 | 0.31342777 | 1.20E-34  | 2.18E-30  | 0.554 | 0.288 |
| SLC39A7   | 9 | 0.31329508 | 2.47E-44  | 4.50E-40  | 0.488 | 0.208 |
| ENPP1     | 9 | 0.31271074 | 9.38E-20  | 1.71E-15  | 0.517 | 0.312 |
| FKBP2     | 9 | 0.31200881 | 1.31E-31  | 2.39E-27  | 0.893 | 0.659 |

|          |   |            |          |          |       |       |
|----------|---|------------|----------|----------|-------|-------|
| HSPB1    | 9 | 0.31094254 | 3.63E-16 | 6.63E-12 | 0.809 | 0.706 |
| CALM1    | 9 | 0.31013178 | 2.08E-17 | 3.79E-13 | 0.721 | 0.544 |
| C1orf122 | 9 | 0.30860272 | 2.54E-31 | 4.63E-27 | 0.666 | 0.398 |
| MESDC2   | 9 | 0.30849282 | 1.92E-32 | 3.51E-28 | 0.637 | 0.37  |
| RHOA     | 9 | 0.30828979 | 1.45E-29 | 2.65E-25 | 0.924 | 0.838 |
| IGFBP5   | 9 | 0.3082245  | 1.05E-14 | 1.91E-10 | 0.339 | 0.184 |
| GTF2H5   | 9 | 0.30726863 | 5.58E-24 | 1.02E-19 | 0.789 | 0.609 |
| SDHC     | 9 | 0.30665028 | 4.54E-40 | 8.28E-36 | 0.585 | 0.297 |
| OS9      | 9 | 0.30638511 | 2.66E-25 | 4.86E-21 | 0.684 | 0.452 |
| DEGS1    | 9 | 0.30453952 | 2.73E-47 | 4.98E-43 | 0.446 | 0.173 |
| CD320    | 9 | 0.30347891 | 2.46E-31 | 4.49E-27 | 0.731 | 0.462 |
| YWHAQ    | 9 | 0.30328323 | 2.64E-24 | 4.81E-20 | 0.885 | 0.699 |
| PSAP     | 9 | 0.30300043 | 6.07E-17 | 1.11E-12 | 0.95  | 0.894 |
| JKAMP    | 9 | 0.30238153 | 1.00E-36 | 1.83E-32 | 0.569 | 0.29  |
| CERCAM   | 9 | 0.30107342 | 7.21E-72 | 1.32E-67 | 0.381 | 0.099 |
| OMD      | 9 | 0.30101258 | 2.70E-19 | 4.93E-15 | 0.303 | 0.144 |
| PRCP     | 9 | 0.30046916 | 3.47E-45 | 6.34E-41 | 0.567 | 0.251 |
| SLC1A5   | 9 | 0.30045764 | 1.25E-23 | 2.29E-19 | 0.462 | 0.261 |
| CD47     | 9 | 0.30020358 | 1.90E-27 | 3.47E-23 | 0.697 | 0.454 |
| MGLL     | 9 | 0.30006033 | 2.22E-26 | 4.05E-22 | 0.352 | 0.156 |
| SEPT11   | 9 | 0.29945954 | 1.50E-46 | 2.74E-42 | 0.418 | 0.154 |
| YIF1B    | 9 | 0.2989705  | 3.29E-38 | 6.01E-34 | 0.449 | 0.195 |
| COMT     | 9 | 0.29881912 | 2.51E-28 | 4.58E-24 | 0.728 | 0.485 |
| EID1     | 9 | 0.29800625 | 1.31E-30 | 2.40E-26 | 0.982 | 0.92  |
| SSR2     | 9 | 0.29747812 | 3.12E-17 | 5.69E-13 | 0.927 | 0.848 |
| PSMD8    | 9 | 0.29743848 | 5.20E-25 | 9.49E-21 | 0.742 | 0.529 |
| PAM      | 9 | 0.2973174  | 3.33E-23 | 6.08E-19 | 0.77  | 0.572 |
| MDFI     | 9 | 0.29703947 | 2.93E-17 | 5.35E-13 | 0.681 | 0.503 |
| PLIN3    | 9 | 0.29611586 | 3.76E-35 | 6.87E-31 | 0.486 | 0.232 |
| SURF4    | 9 | 0.29359143 | 8.47E-35 | 1.55E-30 | 0.52  | 0.258 |
| SEPT15   | 9 | 0.29295767 | 5.91E-26 | 1.08E-21 | 0.663 | 0.434 |
| SDF4     | 9 | 0.29248177 | 1.86E-28 | 3.40E-24 | 0.877 | 0.65  |
| C7orf73  | 9 | 0.29201283 | 4.06E-29 | 7.40E-25 | 0.919 | 0.742 |
| ANXA6    | 9 | 0.29199911 | 2.66E-57 | 4.86E-53 | 0.42  | 0.137 |
| ITFG1    | 9 | 0.29161554 | 6.05E-39 | 1.10E-34 | 0.551 | 0.263 |
| CXXC5    | 9 | 0.28998518 | 1.13E-23 | 2.06E-19 | 0.585 | 0.346 |
| SERPINE1 | 9 | 0.28963327 | 4.51E-07 | 8.23E-03 | 0.258 | 0.162 |
| ASPH     | 9 | 0.28910605 | 2.23E-28 | 4.07E-24 | 0.601 | 0.346 |
| TMX1     | 9 | 0.28871502 | 5.11E-29 | 9.32E-25 | 0.705 | 0.449 |

|           |   |            |          |          |       |       |
|-----------|---|------------|----------|----------|-------|-------|
| SEC23A    | 9 | 0.2864053  | 1.37E-28 | 2.49E-24 | 0.619 | 0.363 |
| SH3BGRL3  | 9 | 0.28614179 | 1.69E-10 | 3.09E-06 | 0.995 | 0.978 |
| DPP7      | 9 | 0.28586714 | 4.84E-20 | 8.84E-16 | 0.762 | 0.589 |
| RANBP1    | 9 | 0.28437423 | 1.38E-21 | 2.52E-17 | 0.752 | 0.541 |
| MLF2      | 9 | 0.28426608 | 1.05E-24 | 1.91E-20 | 0.676 | 0.448 |
| PSMB2     | 9 | 0.283976   | 3.07E-28 | 5.60E-24 | 0.653 | 0.402 |
| HSPA9     | 9 | 0.28356729 | 7.67E-33 | 1.40E-28 | 0.499 | 0.242 |
| GPC1      | 9 | 0.28343148 | 1.65E-33 | 3.00E-29 | 0.426 | 0.19  |
| ARPC5     | 9 | 0.28305863 | 1.08E-23 | 1.97E-19 | 0.749 | 0.55  |
| FBN1      | 9 | 0.28121867 | 6.59E-32 | 1.20E-27 | 0.347 | 0.141 |
| MT-ND3    | 9 | 0.28115822 | 1.15E-15 | 2.10E-11 | 0.88  | 0.694 |
| COPZ2     | 9 | 0.28085695 | 8.08E-28 | 1.47E-23 | 0.52  | 0.28  |
| TCTN1     | 9 | 0.28078019 | 6.99E-36 | 1.28E-31 | 0.509 | 0.244 |
| TRIP6     | 9 | 0.28036252 | 6.71E-33 | 1.22E-28 | 0.525 | 0.266 |
| C9orf3    | 9 | 0.28020793 | 4.22E-26 | 7.70E-22 | 0.648 | 0.398 |
| CNPY4     | 9 | 0.27958656 | 4.89E-79 | 8.92E-75 | 0.394 | 0.097 |
| UBC       | 9 | 0.27943531 | 5.70E-20 | 1.04E-15 | 0.966 | 0.933 |
| TNFRSF12A | 9 | 0.2792071  | 1.05E-13 | 1.92E-09 | 0.601 | 0.411 |
| SYNGR1    | 9 | 0.27895284 | 2.56E-58 | 4.67E-54 | 0.363 | 0.104 |
| ACAT2     | 9 | 0.27875003 | 3.69E-20 | 6.73E-16 | 0.373 | 0.195 |
| APP       | 9 | 0.27855419 | 1.51E-24 | 2.75E-20 | 0.601 | 0.37  |
| NT5DC2    | 9 | 0.27769392 | 1.25E-46 | 2.28E-42 | 0.371 | 0.124 |
| PHLDA2    | 9 | 0.27579133 | 2.89E-19 | 5.27E-15 | 0.332 | 0.165 |
| ERP29     | 9 | 0.27543914 | 2.23E-20 | 4.08E-16 | 0.862 | 0.72  |
| ERGIC3    | 9 | 0.27525566 | 1.36E-22 | 2.48E-18 | 0.927 | 0.804 |
| NDUFA4L2  | 9 | 0.27499964 | 3.94E-30 | 7.20E-26 | 1     | 0.999 |
| ERLEC1    | 9 | 0.2744046  | 2.59E-26 | 4.72E-22 | 0.689 | 0.442 |
| NDUFA12   | 9 | 0.27405241 | 1.36E-28 | 2.49E-24 | 0.577 | 0.328 |
| FBLN2     | 9 | 0.27399446 | 3.47E-71 | 6.34E-67 | 0.235 | 0.042 |
| TMED7     | 9 | 0.27362338 | 1.96E-26 | 3.58E-22 | 0.65  | 0.403 |
| GNL3      | 9 | 0.27184854 | 5.03E-39 | 9.18E-35 | 0.514 | 0.235 |
| SEC61B    | 9 | 0.27158747 | 6.72E-24 | 1.23E-19 | 0.922 | 0.813 |
| PRKCSH    | 9 | 0.27157033 | 8.64E-24 | 1.58E-19 | 0.624 | 0.393 |
| ECH1      | 9 | 0.27091918 | 2.16E-28 | 3.93E-24 | 0.624 | 0.365 |
| MFSD10    | 9 | 0.27089966 | 8.35E-33 | 1.52E-28 | 0.533 | 0.269 |
| PLAU      | 9 | 0.26990421 | 1.08E-58 | 1.96E-54 | 0.117 | 0.013 |
| TMEM230   | 9 | 0.26957469 | 7.99E-23 | 1.46E-18 | 0.869 | 0.707 |
| GOLM1     | 9 | 0.26869277 | 2.55E-37 | 4.66E-33 | 0.496 | 0.227 |
| GAS6      | 9 | 0.26861537 | 1.10E-14 | 2.01E-10 | 0.574 | 0.393 |

|             |   |            |          |          |       |       |
|-------------|---|------------|----------|----------|-------|-------|
| RAB2A       | 9 | 0.26849391 | 5.25E-24 | 9.59E-20 | 0.88  | 0.689 |
| CKB         | 9 | 0.26830216 | 1.92E-14 | 3.50E-10 | 0.253 | 0.126 |
| ARPC2       | 9 | 0.26823446 | 2.12E-17 | 3.86E-13 | 0.898 | 0.792 |
| ERH         | 9 | 0.26791221 | 4.76E-22 | 8.69E-18 | 0.877 | 0.715 |
| ATP5C1      | 9 | 0.26771624 | 3.16E-23 | 5.76E-19 | 0.705 | 0.485 |
| NDUFA11     | 9 | 0.26739653 | 2.55E-25 | 4.66E-21 | 0.974 | 0.877 |
| VWA1        | 9 | 0.26730688 | 4.63E-47 | 8.44E-43 | 0.379 | 0.128 |
| FBLN7       | 9 | 0.265566   | 2.30E-35 | 4.20E-31 | 0.467 | 0.209 |
| TPST1       | 9 | 0.26546415 | 1.64E-34 | 3.00E-30 | 0.418 | 0.182 |
| HMGCS1      | 9 | 0.26521798 | 6.05E-22 | 1.10E-17 | 0.285 | 0.124 |
| MXRA5       | 9 | 0.2647519  | 6.05E-76 | 1.10E-71 | 0.29  | 0.058 |
| DYNLL1      | 9 | 0.26472344 | 7.66E-19 | 1.40E-14 | 0.898 | 0.847 |
| SCP2        | 9 | 0.26470579 | 4.50E-26 | 8.21E-22 | 0.674 | 0.433 |
| CHMP1B      | 9 | 0.26457867 | 8.18E-12 | 1.49E-07 | 0.371 | 0.232 |
| GLT8D2      | 9 | 0.2626978  | 1.70E-63 | 3.10E-59 | 0.379 | 0.106 |
| FKBP9       | 9 | 0.26230511 | 3.04E-29 | 5.56E-25 | 0.42  | 0.197 |
| ITGA11      | 9 | 0.26170939 | 1.49E-41 | 2.71E-37 | 0.358 | 0.124 |
| PDLIM2      | 9 | 0.26037071 | 6.11E-18 | 1.12E-13 | 0.684 | 0.508 |
| GLB1        | 9 | 0.26002841 | 5.42E-82 | 9.89E-78 | 0.321 | 0.066 |
| ID2         | 9 | 0.25960356 | 3.46E-08 | 6.31E-04 | 0.695 | 0.567 |
| ARSA        | 9 | 0.25937463 | 2.24E-54 | 4.08E-50 | 0.394 | 0.125 |
| HSD17B12    | 9 | 0.25916075 | 4.63E-30 | 8.45E-26 | 0.522 | 0.268 |
| PRDX3       | 9 | 0.25893327 | 1.09E-22 | 1.98E-18 | 0.585 | 0.367 |
| AKR7A2      | 9 | 0.25878468 | 9.70E-25 | 1.77E-20 | 0.624 | 0.39  |
| WDR61       | 9 | 0.2586289  | 5.35E-34 | 9.76E-30 | 0.509 | 0.245 |
| RP11-14N7.2 | 9 | 0.25857708 | 1.34E-38 | 2.45E-34 | 0.426 | 0.172 |
| DPM1        | 9 | 0.2583618  | 6.09E-28 | 1.11E-23 | 0.559 | 0.311 |
| SFPQ        | 9 | 0.25731438 | 6.74E-26 | 1.23E-21 | 0.52  | 0.283 |
| C14orf119   | 9 | 0.25695679 | 3.22E-38 | 5.87E-34 | 0.47  | 0.204 |
| SRSF11      | 9 | 0.25694508 | 1.73E-24 | 3.15E-20 | 0.723 | 0.481 |
| MEG3        | 9 | 0.25659453 | 1.33E-13 | 2.43E-09 | 0.457 | 0.293 |
| MT-ATP6     | 9 | 0.255857   | 9.46E-16 | 1.73E-11 | 0.945 | 0.813 |
| PSMC2       | 9 | 0.25574535 | 1.37E-33 | 2.49E-29 | 0.452 | 0.206 |
| B2M         | 9 | 0.2555891  | 7.90E-24 | 1.44E-19 | 1     | 0.991 |
| AKR1A1      | 9 | 0.25531634 | 5.20E-24 | 9.50E-20 | 0.574 | 0.35  |
| RAMP2       | 9 | 0.25509742 | 2.72E-40 | 4.97E-36 | 0.337 | 0.116 |
| PSMA3       | 9 | 0.25496628 | 2.14E-27 | 3.91E-23 | 0.527 | 0.285 |
| CTSB        | 9 | 0.25432395 | 2.58E-15 | 4.71E-11 | 0.742 | 0.585 |
| YIPF5       | 9 | 0.25394933 | 1.08E-24 | 1.97E-20 | 0.593 | 0.359 |



| UQCRCQ   | 9       | 0.25307164 | 4.24E-19  | 7.73E-15  | 0.974 | 0.92  |
|----------|---------|------------|-----------|-----------|-------|-------|
| S100A6   | 9       | 0.25267676 | 8.75E-18  | 1.60E-13  | 1     | 1     |
| NDUFA3   | 9       | 0.25248621 | 2.76E-21  | 5.03E-17  | 0.762 | 0.556 |
| MAGEH1   | 9       | 0.25219768 | 6.60E-30  | 1.20E-25  | 0.441 | 0.21  |
| CD46     | 9       | 0.25205273 | 3.70E-39  | 6.76E-35  | 0.431 | 0.176 |
| MAP7D3   | 9       | 0.25160921 | 2.88E-22  | 5.25E-18  | 0.48  | 0.266 |
| ANXA4    | 9       | 0.25139925 | 2.53E-20  | 4.61E-16  | 0.595 | 0.384 |
| GJA1     | 9       | 0.25132442 | 1.19E-19  | 2.17E-15  | 0.379 | 0.198 |
| SYPL1    | 9       | 0.25071652 | 2.52E-19  | 4.60E-15  | 0.807 | 0.625 |
| SPTLC3   | 9       | 0.2504571  | 4.67E-19  | 8.53E-15  | 0.394 | 0.205 |
| ALDOC    | 9       | 0.25043529 | 4.32E-23  | 7.89E-19  | 0.567 | 0.336 |
| gene     | cluster | avg_logFC  | p_val     | p_val_adj | pct.1 | pct.2 |
| PPP3CA   | 10      | 1.16514419 | 2.26E-114 | 4.13E-110 | 0.977 | 0.755 |
| CTNNB1   | 10      | 1.15696994 | 3.27E-151 | 5.97E-147 | 0.909 | 0.39  |
| PPP1CB   | 10      | 1.03291707 | 1.26E-132 | 2.30E-128 | 0.983 | 0.758 |
| HNRNPH1  | 10      | 0.87321914 | 1.18E-143 | 2.16E-139 | 0.969 | 0.497 |
| WTAP     | 10      | 0.79456585 | 3.45E-56  | 6.29E-52  | 0.906 | 0.684 |
| SET      | 10      | 0.71884121 | 3.38E-109 | 6.18E-105 | 0.971 | 0.743 |
| B3GNT7   | 10      | 0.66949141 | 3.63E-76  | 6.63E-72  | 0.729 | 0.319 |
| GOLIM4   | 10      | 0.65872269 | 1.91E-69  | 3.48E-65  | 0.829 | 0.437 |
| CDC42    | 10      | 0.6065014  | 2.58E-83  | 4.71E-79  | 0.943 | 0.649 |
| TSPYL1   | 10      | 0.57613144 | 5.77E-70  | 1.05E-65  | 0.791 | 0.422 |
| PHKG1    | 10      | 0.56039384 | 2.83E-100 | 5.17E-96  | 0.586 | 0.168 |
| C1orf56  | 10      | 0.52506846 | 1.81E-70  | 3.30E-66  | 0.574 | 0.205 |
| TRA2A    | 10      | 0.48496542 | 3.64E-68  | 6.64E-64  | 0.654 | 0.271 |
| MDM4     | 10      | 0.44630936 | 3.86E-71  | 7.05E-67  | 0.643 | 0.247 |
| VEGFA    | 10      | 0.43804227 | 1.10E-16  | 2.01E-12  | 0.72  | 0.582 |
| EIF2S3   | 10      | 0.43387662 | 3.83E-41  | 6.98E-37  | 0.826 | 0.543 |
| ARF6     | 10      | 0.4128256  | 2.95E-24  | 5.39E-20  | 0.717 | 0.554 |
| CDC42SE1 | 10      | 0.40472776 | 5.42E-43  | 9.89E-39  | 0.554 | 0.258 |
| MRPS6    | 10      | 0.40358401 | 4.50E-14  | 8.20E-10  | 0.943 | 0.911 |
| UPP1     | 10      | 0.40018315 | 5.19E-23  | 9.48E-19  | 0.617 | 0.376 |
| SEC22B   | 10      | 0.39980596 | 9.58E-40  | 1.75E-35  | 0.697 | 0.413 |
| C11orf96 | 10      | 0.3971298  | 5.42E-17  | 9.89E-13  | 0.394 | 0.216 |
| YWHAE    | 10      | 0.3922121  | 1.40E-43  | 2.56E-39  | 0.974 | 0.886 |
| KLF3     | 10      | 0.37426839 | 2.81E-16  | 5.12E-12  | 0.454 | 0.283 |
| HMGA1    | 10      | 0.37059516 | 4.80E-15  | 8.75E-11  | 0.566 | 0.385 |
| EIF4A2   | 10      | 0.36710121 | 3.55E-39  | 6.48E-35  | 1     | 0.971 |
| THAP5    | 10      | 0.36494436 | 7.80E-43  | 1.42E-38  | 0.58  | 0.28  |

| CCDC85B    | 10      | 0.36226544 | 1.42E-13    | 2.59E-09    | 0.886 | 0.795 |
|------------|---------|------------|-------------|-------------|-------|-------|
| PPP1R15A   | 10      | 0.35702423 | 6.98E-13    | 1.27E-08    | 0.514 | 0.34  |
| PTGS2      | 10      | 0.35230701 | 2.23E-15    | 4.07E-11    | 0.526 | 0.332 |
| SLC25A37   | 10      | 0.35131457 | 6.57E-24    | 1.20E-19    | 0.897 | 0.751 |
| INSR       | 10      | 0.35017752 | 1.34E-51    | 2.44E-47    | 0.506 | 0.193 |
| PTPRS      | 10      | 0.34698    | 8.91E-58    | 1.63E-53    | 0.431 | 0.136 |
| SUMF2      | 10      | 0.33410345 | 2.10E-17    | 3.82E-13    | 0.614 | 0.45  |
| ERO1A      | 10      | 0.33331936 | 1.08E-17    | 1.96E-13    | 0.689 | 0.533 |
| PRG4       | 10      | 0.32489725 | 9.22E-10    | 1.68E-05    | 0.469 | 0.313 |
| ARRDC3     | 10      | 0.32341595 | 7.88E-14    | 1.44E-09    | 0.551 | 0.386 |
| PAQR7      | 10      | 0.32245793 | 5.24E-82    | 9.56E-78    | 0.406 | 0.095 |
| NRN1       | 10      | 0.31577218 | 9.33E-10    | 1.70E-05    | 0.611 | 0.458 |
| SH3BP5     | 10      | 0.31471812 | 4.71E-17    | 8.59E-13    | 0.534 | 0.353 |
| TMED4      | 10      | 0.31452865 | 5.43E-26    | 9.91E-22    | 0.654 | 0.422 |
| RABGGTB    | 10      | 0.31223364 | 5.46E-20    | 9.97E-16    | 0.786 | 0.626 |
| SDC4       | 10      | 0.30899801 | 1.62E-20    | 2.96E-16    | 0.557 | 0.352 |
| STK17A     | 10      | 0.29667041 | 1.16E-13    | 2.11E-09    | 0.523 | 0.35  |
| CBX6       | 10      | 0.29390746 | 1.12E-34    | 2.05E-30    | 0.534 | 0.254 |
| GRB10      | 10      | 0.29143681 | 2.53E-21    | 4.63E-17    | 0.28  | 0.116 |
| CSGALNACT2 | 10      | 0.2890696  | 1.18E-12    | 2.15E-08    | 0.386 | 0.243 |
| LRRC75A    | 10      | 0.28342999 | 1.65E-45    | 3.00E-41    | 0.34  | 0.104 |
| SNHG12     | 10      | 0.27147373 | 1.90E-14    | 3.47E-10    | 0.566 | 0.396 |
| NRP2       | 10      | 0.2644277  | 5.31E-10    | 9.69E-06    | 0.446 | 0.306 |
| CD55       | 10      | 0.25288987 | 6.07E-09    | 0.000110693 | 0.703 | 0.579 |
| LSM12      | 10      | 0.25210943 | 1.35E-18    | 2.46E-14    | 0.486 | 0.294 |
| GIGYF1     | 10      | 0.25110194 | 2.38E-54    | 4.34E-50    | 0.357 | 0.1   |
| PER2       | 10      | 0.25082422 | 5.73E-28    | 1.05E-23    | 0.303 | 0.117 |
| PPFIBP1    | 10      | 0.25015251 | 4.97E-09    | 9.07E-05    | 0.563 | 0.453 |
| gene       | cluster | avg_logFC  | p_val       | p_val_adj   | pct.1 | pct.2 |
| DDIT3      | 11      | 1.01636039 | 1.98829E-77 | 3.62803E-73 | 0.855 | 0.495 |
| HSPA5      | 11      | 0.91244838 | 3.91406E-64 | 7.14199E-60 | 0.808 | 0.462 |
| NUPR1      | 11      | 0.81865542 | 2.28731E-78 | 4.17365E-74 | 0.991 | 0.966 |
| DNAJB9     | 11      | 0.8130223  | 1.52999E-36 | 2.79177E-32 | 0.805 | 0.614 |
| SLC3A2     | 11      | 0.77190581 | 2.99164E-52 | 5.45884E-48 | 0.752 | 0.402 |
| TCEA1      | 11      | 0.7216598  | 3.13005E-71 | 5.7114E-67  | 0.934 | 0.748 |
| GDF15      | 11      | 0.69976465 | 3.9355E-116 | 7.1811E-112 | 0.421 | 0.073 |
| SARS       | 11      | 0.67811653 | 5.64109E-70 | 1.02933E-65 | 0.855 | 0.561 |
| PPP1R15A   | 11      | 0.67615385 | 1.81982E-36 | 3.32062E-32 | 0.635 | 0.338 |
| MYLK       | 11      | 0.65840034 | 1.64116E-35 | 2.99462E-31 | 0.528 | 0.271 |

|          |    |            |             |             |       |       |
|----------|----|------------|-------------|-------------|-------|-------|
| HERPUD1  | 11 | 0.64516059 | 4.15499E-33 | 7.58161E-29 | 0.739 | 0.485 |
| XBP1     | 11 | 0.64374725 | 2.49601E-41 | 4.55448E-37 | 0.862 | 0.624 |
| TRIB3    | 11 | 0.63383925 | 5.9572E-233 | 1.087E-228  | 0.371 | 0.028 |
| FTL      | 11 | 0.62672792 | 3.97119E-43 | 7.24622E-39 | 1     | 1     |
| RPS27L   | 11 | 0.56241273 | 1.08334E-48 | 1.97677E-44 | 0.991 | 0.953 |
| MAP1LC3B | 11 | 0.55658305 | 6.4877E-30  | 1.18381E-25 | 0.761 | 0.509 |
| VIMP     | 11 | 0.55368449 | 2.41424E-33 | 4.40526E-29 | 0.868 | 0.694 |
| SQSTM1   | 11 | 0.5386931  | 5.80024E-39 | 1.05837E-34 | 0.981 | 0.895 |
| ARF4     | 11 | 0.52124572 | 2.62515E-16 | 4.79012E-12 | 0.84  | 0.726 |
| HSPA9    | 11 | 0.51855897 | 1.06446E-60 | 1.94231E-56 | 0.594 | 0.241 |
| RHEB     | 11 | 0.49004017 | 3.79267E-42 | 6.92049E-38 | 0.962 | 0.788 |
| MANF     | 11 | 0.48268286 | 2.67609E-14 | 4.88306E-10 | 0.506 | 0.332 |
| FTH1     | 11 | 0.47586166 | 2.24136E-28 | 4.08982E-24 | 1     | 1     |
| PRDX1    | 11 | 0.46621681 | 5.48781E-36 | 1.00136E-31 | 0.95  | 0.828 |
| CDKN1A   | 11 | 0.46567728 | 3.03516E-25 | 5.53826E-21 | 0.409 | 0.198 |
| ISG15    | 11 | 0.46422136 | 5.60459E-07 | 0.010226689 | 0.186 | 0.102 |
| SEC61B   | 11 | 0.45941699 | 5.27048E-36 | 9.61704E-32 | 0.928 | 0.814 |
| MGST1    | 11 | 0.45858142 | 8.92906E-13 | 1.62929E-08 | 0.443 | 0.29  |
| CYCS     | 11 | 0.45133861 | 1.45645E-22 | 2.65759E-18 | 0.701 | 0.49  |
| BEX2     | 11 | 0.44812387 | 1.01105E-26 | 1.84486E-22 | 0.55  | 0.312 |
| RNF187   | 11 | 0.4459392  | 4.52439E-35 | 8.25565E-31 | 0.764 | 0.507 |
| CEBPB    | 11 | 0.4403046  | 9.16598E-29 | 1.67252E-24 | 0.805 | 0.58  |
| ATP6V0B  | 11 | 0.42384025 | 1.31753E-21 | 2.4041E-17  | 0.733 | 0.533 |
| CDK2AP2  | 11 | 0.42349519 | 1.49185E-18 | 2.72218E-14 | 0.494 | 0.286 |
| UBC      | 11 | 0.4201087  | 2.46031E-21 | 4.48933E-17 | 0.981 | 0.933 |
| PFDN2    | 11 | 0.41278706 | 1.00624E-22 | 1.83608E-18 | 0.77  | 0.57  |
| CEBPG    | 11 | 0.4092593  | 1.2882E-53  | 2.35059E-49 | 0.528 | 0.196 |
| GHITM    | 11 | 0.40762429 | 7.3981E-31  | 1.34993E-26 | 0.84  | 0.609 |
| XPOT     | 11 | 0.39899758 | 2.62247E-57 | 4.78523E-53 | 0.557 | 0.206 |
| NR1D1    | 11 | 0.39193081 | 1.28389E-08 | 0.000234272 | 0.469 | 0.321 |
| SDF2L1   | 11 | 0.39003641 | 5.43535E-31 | 9.91789E-27 | 0.525 | 0.255 |
| ODC1     | 11 | 0.38502917 | 1.3568E-29  | 2.47575E-25 | 0.594 | 0.333 |
| HSP90AA1 | 11 | 0.38295605 | 4.99687E-15 | 9.11779E-11 | 0.868 | 0.745 |
| SELK     | 11 | 0.38289867 | 2.50654E-12 | 4.57368E-08 | 0.874 | 0.814 |
| ORM1     | 11 | 0.38172633 | 6.6673E-09  | 0.000121658 | 0.352 | 0.226 |
| RNH1     | 11 | 0.36651659 | 5.30569E-27 | 9.6813E-23  | 0.752 | 0.535 |
| SDCBP    | 11 | 0.36385489 | 5.26885E-07 | 0.009614064 | 0.619 | 0.541 |
| SPCS2    | 11 | 0.36372765 | 1.21968E-21 | 2.22555E-17 | 0.909 | 0.793 |
| MTHFD2   | 11 | 0.36360921 | 2.39885E-18 | 4.37718E-14 | 0.736 | 0.558 |

|         |    |            |             |             |       |       |
|---------|----|------------|-------------|-------------|-------|-------|
| GARS    | 11 | 0.36238992 | 2.31777E-41 | 4.22923E-37 | 0.553 | 0.246 |
| SEC11C  | 11 | 0.36067115 | 5.75304E-28 | 1.04976E-23 | 0.525 | 0.272 |
| TIMM17A | 11 | 0.36033497 | 7.9034E-18  | 1.44213E-13 | 0.459 | 0.26  |
| TMED9   | 11 | 0.35968215 | 2.4458E-21  | 4.46284E-17 | 0.824 | 0.62  |
| POLR2K  | 11 | 0.35675361 | 1.63234E-12 | 2.97853E-08 | 0.714 | 0.567 |
| TXN     | 11 | 0.35294826 | 3.23084E-11 | 5.89532E-07 | 0.906 | 0.846 |
| SERP1   | 11 | 0.35126925 | 9.39125E-12 | 1.71362E-07 | 0.881 | 0.831 |
| ADRM1   | 11 | 0.34969405 | 2.04979E-31 | 3.74024E-27 | 0.591 | 0.319 |
| IFRD1   | 11 | 0.34612734 | 4.66795E-17 | 8.51761E-13 | 0.682 | 0.505 |
| HSP90B1 | 11 | 0.34487448 | 2.20882E-18 | 4.03043E-14 | 0.89  | 0.783 |
| EIF2S2  | 11 | 0.34197982 | 8.27855E-28 | 1.51059E-23 | 0.893 | 0.776 |
| MYDGF   | 11 | 0.33796891 | 1.76957E-14 | 3.22894E-10 | 0.862 | 0.775 |
| CCPG1   | 11 | 0.33122608 | 1.31537E-17 | 2.40015E-13 | 0.67  | 0.481 |
| TRMT112 | 11 | 0.33074562 | 9.72435E-24 | 1.7744E-19  | 0.962 | 0.899 |
| BAX     | 11 | 0.32666292 | 1.54266E-23 | 2.81488E-19 | 0.61  | 0.366 |
| NUDC    | 11 | 0.32584977 | 1.42521E-21 | 2.60058E-17 | 0.777 | 0.587 |
| WARS    | 11 | 0.32550266 | 2.31553E-63 | 4.22514E-59 | 0.324 | 0.073 |
| HNRNPH3 | 11 | 0.32539989 | 2.55654E-12 | 4.66492E-08 | 0.604 | 0.447 |
| ERH     | 11 | 0.32349542 | 5.11855E-20 | 9.33981E-16 | 0.862 | 0.716 |
| ISCU    | 11 | 0.32328154 | 1.58423E-18 | 2.89074E-14 | 0.597 | 0.413 |
| DNAJB11 | 11 | 0.32182673 | 4.03698E-24 | 7.36627E-20 | 0.481 | 0.242 |
| PSMB3   | 11 | 0.3216184  | 1.12299E-21 | 2.04912E-17 | 0.579 | 0.361 |
| PTP4A1  | 11 | 0.32153336 | 6.60041E-17 | 1.20438E-12 | 0.695 | 0.479 |
| HM13    | 11 | 0.32096612 | 2.79148E-18 | 5.09361E-14 | 0.56  | 0.351 |
| PSMA7   | 11 | 0.31545006 | 3.19838E-25 | 5.83608E-21 | 0.953 | 0.862 |
| SNU13   | 11 | 0.31277787 | 1.34046E-15 | 2.44594E-11 | 0.906 | 0.848 |
| SNRPG   | 11 | 0.31248116 | 1.87826E-11 | 3.42726E-07 | 0.833 | 0.727 |
| GFPT1   | 11 | 0.31227043 | 1.28984E-20 | 2.35358E-16 | 0.481 | 0.271 |
| H3F3B   | 11 | 0.31199046 | 1.40597E-13 | 2.56547E-09 | 1     | 0.999 |
| TKT     | 11 | 0.30870773 | 6.04911E-16 | 1.10378E-11 | 0.698 | 0.513 |
| RNF181  | 11 | 0.30857247 | 2.14944E-17 | 3.92208E-13 | 0.761 | 0.584 |
| CANX    | 11 | 0.30698977 | 3.19576E-19 | 5.8313E-15  | 0.846 | 0.712 |
| RAD23A  | 11 | 0.30629126 | 8.70396E-20 | 1.58821E-15 | 0.796 | 0.635 |
| ARF1    | 11 | 0.3058705  | 9.51101E-20 | 1.73547E-15 | 0.833 | 0.65  |
| ZC3H15  | 11 | 0.30476442 | 2.69137E-18 | 4.91094E-14 | 0.695 | 0.484 |
| CYC1    | 11 | 0.30352654 | 5.78431E-19 | 1.05546E-14 | 0.676 | 0.457 |
| COPE    | 11 | 0.30332203 | 1.7233E-19  | 3.1445E-15  | 0.752 | 0.559 |
| PSMB1   | 11 | 0.30309391 | 4.22588E-18 | 7.71096E-14 | 0.84  | 0.692 |
| COX7B   | 11 | 0.30280978 | 2.40124E-11 | 4.38154E-07 | 0.748 | 0.628 |

|         |    |            |             |             |       |       |
|---------|----|------------|-------------|-------------|-------|-------|
| PSMB6   | 11 | 0.30251987 | 1.21492E-18 | 2.21686E-14 | 0.673 | 0.488 |
| UFM1    | 11 | 0.30165533 | 1.0762E-14  | 1.96373E-10 | 0.723 | 0.56  |
| UQCC2   | 11 | 0.30131842 | 2.64516E-19 | 4.82663E-15 | 0.695 | 0.476 |
| TERF2IP | 11 | 0.29838187 | 6.82839E-12 | 1.24598E-07 | 0.597 | 0.437 |
| TALDO1  | 11 | 0.29766105 | 4.712E-16   | 8.59799E-12 | 0.654 | 0.481 |
| CAMTA2  | 11 | 0.29759747 | 1.10883E-22 | 2.02329E-18 | 0.318 | 0.135 |
| WBSCR22 | 11 | 0.29702957 | 3.99816E-23 | 7.29544E-19 | 0.572 | 0.334 |
| SF3B2   | 11 | 0.29169396 | 6.37472E-17 | 1.1632E-12  | 0.594 | 0.396 |
| EIF1B   | 11 | 0.29164777 | 8.33776E-17 | 1.52139E-12 | 0.821 | 0.667 |
| TCEB1   | 11 | 0.29102922 | 1.23937E-10 | 2.26148E-06 | 0.726 | 0.6   |
| EIF5    | 11 | 0.29091154 | 1.01925E-13 | 1.85983E-09 | 0.808 | 0.647 |
| MTCH1   | 11 | 0.29048603 | 2.65184E-17 | 4.8388E-13  | 0.698 | 0.499 |
| ANXA5   | 11 | 0.28958193 | 2.28361E-13 | 4.16691E-09 | 0.909 | 0.822 |
| SRP14   | 11 | 0.28897534 | 7.78987E-21 | 1.42142E-16 | 0.994 | 0.983 |
| BUD31   | 11 | 0.28811199 | 1.03188E-16 | 1.88287E-12 | 0.651 | 0.453 |
| DDX5    | 11 | 0.28730423 | 5.4956E-11  | 1.00278E-06 | 0.742 | 0.584 |
| TMBIM6  | 11 | 0.28531224 | 5.07812E-20 | 9.26605E-16 | 0.858 | 0.696 |
| MTDH    | 11 | 0.28431453 | 4.52193E-11 | 8.25117E-07 | 0.78  | 0.651 |
| ATF5    | 11 | 0.28360783 | 1.91156E-19 | 3.48802E-15 | 0.236 | 0.093 |
| COX6A1  | 11 | 0.28152528 | 7.807E-16   | 1.42454E-11 | 0.89  | 0.836 |
| DDX24   | 11 | 0.2803736  | 1.05735E-09 | 1.92936E-05 | 0.585 | 0.445 |
| DNAJA1  | 11 | 0.27968341 | 4.83E-17    | 8.8133E-13  | 0.428 | 0.235 |
| NAPA    | 11 | 0.27925379 | 3.3548E-21  | 6.12151E-17 | 0.465 | 0.251 |
| TRAM1   | 11 | 0.2791617  | 4.73736E-12 | 8.64426E-08 | 0.877 | 0.774 |
| PHGDH   | 11 | 0.27893726 | 2.63551E-44 | 4.80902E-40 | 0.387 | 0.124 |
| CMSS1   | 11 | 0.27879972 | 8.06644E-18 | 1.47188E-13 | 0.547 | 0.342 |
| EIF1    | 11 | 0.27877083 | 3.17155E-27 | 5.78713E-23 | 1     | 1     |
| PHLDA3  | 11 | 0.27830939 | 3.33693E-23 | 6.0889E-19  | 0.415 | 0.2   |
| MORF4L2 | 11 | 0.27793397 | 1.42639E-06 | 0.026027287 | 0.742 | 0.651 |
| DNAJC8  | 11 | 0.27773991 | 9.0053E-15  | 1.6432E-10  | 0.619 | 0.446 |
| SAP18   | 11 | 0.27676133 | 3.52808E-17 | 6.43768E-13 | 0.899 | 0.814 |
| SLIRP   | 11 | 0.27464993 | 6.43838E-15 | 1.17481E-10 | 0.855 | 0.704 |
| PSMD8   | 11 | 0.27070791 | 1.80657E-15 | 3.29645E-11 | 0.701 | 0.531 |
| ATF4    | 11 | 0.2704856  | 3.41641E-20 | 6.23393E-16 | 0.956 | 0.895 |
| MKNK2   | 11 | 0.26861941 | 3.38832E-41 | 6.18267E-37 | 0.377 | 0.125 |
| DNAJC3  | 11 | 0.2675472  | 3.79888E-08 | 0.000693182 | 0.513 | 0.374 |
| FKBP2   | 11 | 0.26700036 | 7.79183E-11 | 1.42177E-06 | 0.752 | 0.664 |
| DNAJB6  | 11 | 0.26463118 | 4.75551E-11 | 8.67739E-07 | 0.594 | 0.455 |
| POMP    | 11 | 0.26331062 | 8.41211E-11 | 1.53496E-06 | 0.912 | 0.845 |

| PDIA3    | 11      | 0.26305986 | 9.59548E-15 | 1.75089E-10 | 0.736 | 0.579 |
|----------|---------|------------|-------------|-------------|-------|-------|
| PTGES3   | 11      | 0.2628195  | 5.13917E-18 | 9.37745E-14 | 0.969 | 0.927 |
| SAR1B    | 11      | 0.25937563 | 7.75882E-14 | 1.41575E-09 | 0.525 | 0.346 |
| PSMD11   | 11      | 0.25909883 | 3.28668E-19 | 5.99721E-15 | 0.513 | 0.295 |
| SSR3     | 11      | 0.25733173 | 7.20109E-16 | 1.31398E-11 | 0.95  | 0.877 |
| PSMC1    | 11      | 0.25706328 | 2.76385E-16 | 5.0432E-12  | 0.547 | 0.352 |
| TGIF1    | 11      | 0.25659859 | 3.52476E-11 | 6.43163E-07 | 0.572 | 0.424 |
| AKR1C2   | 11      | 0.2550844  | 6.85694E-07 | 0.012511851 | 0.264 | 0.165 |
| ATP6V1E1 | 11      | 0.25507052 | 8.10666E-20 | 1.47922E-15 | 0.531 | 0.306 |
| SF3B5    | 11      | 0.25319813 | 2.94569E-11 | 5.375E-07   | 0.84  | 0.729 |
| MDM2     | 11      | 0.25089938 | 4.01497E-16 | 7.32612E-12 | 0.292 | 0.137 |
| gene     | cluster | avg_logFC  | p_val       | p_val_adj   | pct.1 | pct.2 |
| MMP3     | 12      | 1.5295724  | 7.27E-115   | 1.33E-110   | 0.983 | 0.742 |
| COMP     | 12      | 1.14845643 | 2.95E-51    | 5.37E-47    | 0.917 | 0.806 |
| SPP1     | 12      | 1.02146992 | 6.67E-15    | 1.22E-10    | 0.62  | 0.417 |
| CHI3L2   | 12      | 0.99530207 | 2.91E-38    | 5.32E-34    | 0.809 | 0.581 |
| SERPINA1 | 12      | 0.87320209 | 5.15E-67    | 9.39E-63    | 0.997 | 0.925 |
| LUM      | 12      | 0.83699934 | 1.45E-79    | 2.65E-75    | 1     | 0.999 |
| PRG4     | 12      | 0.7557971  | 2.07E-14    | 3.78E-10    | 0.482 | 0.313 |
| TIMP1    | 12      | 0.74793424 | 5.74E-57    | 1.05E-52    | 1     | 0.997 |
| LCN2     | 12      | 0.74678932 | 5.48E-30    | 9.99E-26    | 0.69  | 0.435 |
| CLU      | 12      | 0.69091147 | 2.99E-58    | 5.46E-54    | 1     | 0.995 |
| SLC3A2   | 12      | 0.6234273  | 1.21E-45    | 2.20E-41    | 0.719 | 0.403 |
| ORM1     | 12      | 0.62121745 | 2.05E-10    | 3.73E-06    | 0.366 | 0.225 |
| PTGS2    | 12      | 0.59540223 | 7.62E-26    | 1.39E-21    | 0.587 | 0.331 |
| ADM      | 12      | 0.54391788 | 1.13E-14    | 2.06E-10    | 0.789 | 0.663 |
| DCN      | 12      | 0.5349675  | 9.81E-53    | 1.79E-48    | 1     | 0.998 |
| DDIT4L   | 12      | 0.51901737 | 2.92E-25    | 5.34E-21    | 0.802 | 0.624 |
| MFGE8    | 12      | 0.47673454 | 4.79E-35    | 8.75E-31    | 0.954 | 0.822 |
| BHLHE40  | 12      | 0.47541002 | 1.94E-19    | 3.55E-15    | 0.637 | 0.465 |
| PGK1     | 12      | 0.46172278 | 9.96E-32    | 1.82E-27    | 0.977 | 0.909 |
| SLC2A1   | 12      | 0.44991103 | 3.09E-25    | 5.63E-21    | 0.535 | 0.298 |
| ERO1A    | 12      | 0.44724299 | 3.24E-13    | 5.91E-09    | 0.65  | 0.534 |
| CD55     | 12      | 0.44686755 | 9.28E-29    | 1.69E-24    | 0.815 | 0.577 |
| PRELP    | 12      | 0.44424925 | 1.12E-24    | 2.04E-20    | 0.987 | 0.925 |
| ENO1     | 12      | 0.42646548 | 2.54E-37    | 4.63E-33    | 0.997 | 0.983 |
| HLA-A    | 12      | 0.4185728  | 1.68E-20    | 3.06E-16    | 0.957 | 0.887 |
| CHI3L1   | 12      | 0.41775613 | 5.31E-18    | 9.69E-14    | 0.983 | 0.919 |
| SERPING1 | 12      | 0.41404591 | 2.33E-25    | 4.25E-21    | 0.743 | 0.53  |

|          |    |            |          |             |       |       |
|----------|----|------------|----------|-------------|-------|-------|
| ORM2     | 12 | 0.41091964 | 3.03E-14 | 5.53E-10    | 0.231 | 0.1   |
| LAPTM4A  | 12 | 0.4105258  | 1.47E-37 | 2.68E-33    | 0.99  | 0.947 |
| HLA-C    | 12 | 0.39622595 | 2.32E-28 | 4.24E-24    | 0.96  | 0.871 |
| PTP4A1   | 12 | 0.38975148 | 4.00E-14 | 7.31E-10    | 0.63  | 0.481 |
| TIMP3    | 12 | 0.38057005 | 1.48E-07 | 0.002702892 | 0.614 | 0.513 |
| SOD2     | 12 | 0.37347122 | 8.88E-19 | 1.62E-14    | 0.974 | 0.894 |
| HLA-B    | 12 | 0.36330775 | 3.43E-20 | 6.26E-16    | 0.881 | 0.776 |
| TMEM45A  | 12 | 0.36188928 | 6.76E-12 | 1.23E-07    | 0.861 | 0.813 |
| AK2      | 12 | 0.35873025 | 7.10E-22 | 1.30E-17    | 0.809 | 0.656 |
| BZW1     | 12 | 0.35200984 | 2.00E-12 | 3.65E-08    | 0.739 | 0.621 |
| ESD      | 12 | 0.34870849 | 5.30E-20 | 9.67E-16    | 0.865 | 0.772 |
| NPR3     | 12 | 0.34745231 | 3.98E-22 | 7.26E-18    | 0.277 | 0.108 |
| LAMP2    | 12 | 0.34451179 | 7.94E-22 | 1.45E-17    | 0.66  | 0.457 |
| GBE1     | 12 | 0.33999426 | 1.44E-15 | 2.62E-11    | 0.726 | 0.577 |
| ABI3BP   | 12 | 0.33857212 | 1.18E-09 | 2.15E-05    | 0.578 | 0.467 |
| TMEM59   | 12 | 0.33399403 | 1.07E-31 | 1.94E-27    | 0.997 | 0.971 |
| CCT8     | 12 | 0.33021005 | 2.50E-17 | 4.55E-13    | 0.743 | 0.606 |
| VAPA     | 12 | 0.3252865  | 1.79E-21 | 3.27E-17    | 0.95  | 0.894 |
| ATP6V1G1 | 12 | 0.3247944  | 1.15E-19 | 2.10E-15    | 0.983 | 0.96  |
| SKP1     | 12 | 0.32368451 | 8.76E-36 | 1.60E-31    | 0.997 | 0.979 |
| EMC2     | 12 | 0.32306611 | 1.97E-16 | 3.60E-12    | 0.604 | 0.441 |
| SQSTM1   | 12 | 0.32120359 | 7.61E-23 | 1.39E-18    | 0.983 | 0.895 |
| IFRD1    | 12 | 0.3204773  | 1.33E-13 | 2.42E-09    | 0.653 | 0.505 |
| UBC      | 12 | 0.31885824 | 7.50E-17 | 1.37E-12    | 0.96  | 0.934 |
| C1S      | 12 | 0.31798296 | 1.35E-12 | 2.47E-08    | 0.713 | 0.618 |
| ENO2     | 12 | 0.31414191 | 3.57E-15 | 6.51E-11    | 0.627 | 0.445 |
| PLCG2    | 12 | 0.31242539 | 1.05E-23 | 1.91E-19    | 0.297 | 0.115 |
| ITM2B    | 12 | 0.31208149 | 7.38E-23 | 1.35E-18    | 0.993 | 0.972 |
| ANXA1    | 12 | 0.3085938  | 7.30E-11 | 1.33E-06    | 0.818 | 0.737 |
| HNRNPK   | 12 | 0.304986   | 7.61E-19 | 1.39E-14    | 0.832 | 0.725 |
| MED21    | 12 | 0.30379951 | 1.08E-14 | 1.97E-10    | 0.597 | 0.429 |
| PTGES3   | 12 | 0.30114309 | 1.09E-23 | 1.98E-19    | 0.98  | 0.927 |
| LGALS3   | 12 | 0.30076629 | 6.75E-19 | 1.23E-14    | 0.977 | 0.923 |
| UPP1     | 12 | 0.29660764 | 3.43E-09 | 6.27E-05    | 0.515 | 0.379 |
| CRTAC1   | 12 | 0.29576862 | 1.83E-12 | 3.34E-08    | 0.386 | 0.234 |
| DNER     | 12 | 0.28874571 | 2.26E-10 | 4.12E-06    | 0.587 | 0.448 |
| VEGFA    | 12 | 0.28735735 | 1.85E-10 | 3.38E-06    | 0.716 | 0.583 |
| CPE      | 12 | 0.27433677 | 5.59E-15 | 1.02E-10    | 0.776 | 0.658 |
| RAB7A    | 12 | 0.27205722 | 2.57E-13 | 4.69E-09    | 0.719 | 0.631 |

| TMEM38B  | 12      | 0.27200764 | 1.09E-14    | 1.98E-10    | 0.62  | 0.448 |
|----------|---------|------------|-------------|-------------|-------|-------|
| HIF1A    | 12      | 0.26919931 | 3.65E-09    | 6.65E-05    | 0.891 | 0.808 |
| FN1      | 12      | 0.26828732 | 2.36E-11    | 4.30E-07    | 1     | 0.997 |
| SDCBP    | 12      | 0.26662303 | 1.41E-12    | 2.57E-08    | 0.67  | 0.54  |
| WDR33    | 12      | 0.26577445 | 1.20E-14    | 2.20E-10    | 0.591 | 0.414 |
| PLA2G4A  | 12      | 0.2656     | 3.87E-09    | 7.07E-05    | 0.366 | 0.244 |
| XBP1     | 12      | 0.26467845 | 9.49E-11    | 1.73E-06    | 0.733 | 0.628 |
| SYF2     | 12      | 0.26280429 | 9.23E-16    | 1.68E-11    | 0.871 | 0.774 |
| METAP2   | 12      | 0.26181412 | 9.20E-13    | 1.68E-08    | 0.805 | 0.719 |
| CA9      | 12      | 0.25960976 | 1.00E-08    | 0.000183131 | 0.488 | 0.358 |
| RAB1A    | 12      | 0.25857483 | 3.41E-11    | 6.23E-07    | 0.795 | 0.717 |
| AIMP1    | 12      | 0.25654945 | 3.77E-12    | 6.87E-08    | 0.65  | 0.527 |
| PCOLCE2  | 12      | 0.25549764 | 5.28E-17    | 9.64E-13    | 0.96  | 0.904 |
| ARPP19   | 12      | 0.25229449 | 4.65E-12    | 8.48E-08    | 0.68  | 0.549 |
| PID1     | 12      | 0.25166281 | 2.70E-09    | 4.93E-05    | 0.597 | 0.485 |
| SOD3     | 12      | 0.25025768 | 4.50E-13    | 8.21E-09    | 0.974 | 0.919 |
| gene     | cluster | avg_logFC  | p_val       | p_val_adj   | pct.1 | pct.2 |
| HIST1H4C | 13      | 2.38875711 | 1.18755E-54 | 2.16692E-50 | 0.849 | 0.503 |
| TUBA1B   | 13      | 2.27228344 | 2.3194E-167 | 4.2323E-163 | 1     | 0.343 |
| TMSB4X   | 13      | 2.1540031  | 1.3078E-102 | 2.38626E-98 | 1     | 0.768 |
| STMN1    | 13      | 2.13243582 | 0           | 0           | 0.98  | 0.064 |
| LGALS1   | 13      | 1.88400448 | 1.4346E-115 | 2.6176E-111 | 1     | 0.973 |
| H2AFZ    | 13      | 1.88296632 | 6.7158E-106 | 1.2254E-101 | 0.99  | 0.847 |
| KIAA0101 | 13      | 1.88110534 | 0           | 0           | 0.899 | 0.048 |
| HMGB2    | 13      | 1.80844934 | 6.7809E-119 | 1.2373E-114 | 0.91  | 0.372 |
| UBE2S    | 13      | 1.63696645 | 0           | 0           | 0.864 | 0.09  |
| PTTG1    | 13      | 1.54511046 | 0           | 0           | 0.884 | 0.06  |
| CKS2     | 13      | 1.53771142 | 4.7499E-277 | 8.6671E-273 | 0.849 | 0.103 |
| TOP2A    | 13      | 1.52132354 | 0           | 0           | 0.849 | 0.012 |
| C12orf75 | 13      | 1.52124796 | 4.6584E-200 | 8.5001E-196 | 0.889 | 0.163 |
| TMSB10   | 13      | 1.4844476  | 6.3058E-101 | 1.15062E-96 | 1     | 0.988 |
| BIRC5    | 13      | 1.43149535 | 0           | 0           | 0.91  | 0.018 |
| TUBB     | 13      | 1.41381418 | 3.01233E-96 | 5.4966E-92  | 0.985 | 0.798 |
| ARL6IP1  | 13      | 1.40747321 | 1.16779E-69 | 2.13087E-65 | 0.864 | 0.48  |
| UBE2C    | 13      | 1.39878865 | 0           | 0           | 0.839 | 0.015 |
| CRIP1    | 13      | 1.37611961 | 3.80233E-98 | 6.93811E-94 | 0.874 | 0.331 |
| HMGB1    | 13      | 1.36870713 | 4.1982E-100 | 7.6604E-96  | 0.99  | 0.763 |
| HMG2     | 13      | 1.35910155 | 3.15416E-68 | 5.7554E-64  | 0.965 | 0.896 |
| PFN1     | 13      | 1.33143977 | 9.77467E-87 | 1.78358E-82 | 0.995 | 0.877 |



|          |    |            |             |             |       |       |
|----------|----|------------|-------------|-------------|-------|-------|
| H2AFV    | 13 | 1.30069343 | 1.1292E-116 | 2.0604E-112 | 0.975 | 0.505 |
| CFL1     | 13 | 1.29521015 | 3.76433E-91 | 6.86878E-87 | 0.99  | 0.77  |
| CDKN3    | 13 | 1.28474054 | 0           | 0           | 0.834 | 0.045 |
| CENPF    | 13 | 1.22968342 | 0           | 0           | 0.784 | 0.009 |
| PTMS     | 13 | 1.21719608 | 5.77855E-63 | 1.05441E-58 | 0.92  | 0.666 |
| RRM2     | 13 | 1.17090262 | 0           | 0           | 0.673 | 0.011 |
| HN1      | 13 | 1.17017563 | 1.5604E-161 | 2.8472E-157 | 0.779 | 0.15  |
| TYMS     | 13 | 1.16694607 | 0           | 0           | 0.905 | 0.063 |
| AXL      | 13 | 1.1629493  | 2.14024E-68 | 3.90529E-64 | 0.799 | 0.337 |
| RHEB     | 13 | 1.16011208 | 5.5255E-103 | 1.00823E-98 | 1     | 0.789 |
| PPP1R14B | 13 | 1.13879229 | 1.0979E-104 | 2.0033E-100 | 0.759 | 0.201 |
| ACTB     | 13 | 1.13848137 | 1.16484E-78 | 2.12549E-74 | 0.995 | 0.944 |
| CALM2    | 13 | 1.13131473 | 6.92587E-85 | 1.26376E-80 | 1     | 0.968 |
| CDK1     | 13 | 1.12115387 | 0           | 0           | 0.688 | 0.012 |
| TPM4     | 13 | 1.08869853 | 6.7385E-128 | 1.2296E-123 | 0.915 | 0.281 |
| COL1A1   | 13 | 1.07331669 | 1.2339E-103 | 2.2515E-99  | 0.412 | 0.054 |
| DYNLL1   | 13 | 1.06825523 | 3.14599E-61 | 5.7405E-57  | 0.985 | 0.846 |
| NUCKS1   | 13 | 1.0615244  | 2.65231E-94 | 4.83968E-90 | 0.99  | 0.632 |
| CENPW    | 13 | 1.06005573 | 0           | 0           | 0.814 | 0.029 |
| MZT1     | 13 | 1.05703434 | 3.2919E-109 | 6.0067E-105 | 0.95  | 0.392 |
| PRSS23   | 13 | 1.05531257 | 6.89853E-48 | 1.25878E-43 | 0.749 | 0.342 |
| PBK      | 13 | 1.04416522 | 0           | 0           | 0.774 | 0.007 |
| TM4SF1   | 13 | 1.04378116 | 7.75673E-43 | 1.41537E-38 | 0.879 | 0.51  |
| COL6A3   | 13 | 1.03423615 | 2.31552E-87 | 4.22512E-83 | 0.864 | 0.343 |
| COL1A2   | 13 | 1.03079836 | 3.74596E-57 | 6.83525E-53 | 0.704 | 0.275 |
| CKS1B    | 13 | 1.02419935 | 1.1326E-102 | 2.06672E-98 | 0.94  | 0.451 |
| NUSAP1   | 13 | 1.00770248 | 0           | 0           | 0.754 | 0.009 |
| THY1     | 13 | 1.00350444 | 3.39701E-47 | 6.19852E-43 | 0.794 | 0.424 |
| EIF5A    | 13 | 0.99185165 | 1.23215E-50 | 2.24831E-46 | 0.879 | 0.561 |
| LMNA     | 13 | 0.98936078 | 1.11328E-85 | 2.0314E-81  | 0.854 | 0.316 |
| TK1      | 13 | 0.97622001 | 0           | 0           | 0.688 | 0.03  |
| VIM      | 13 | 0.97371625 | 4.40086E-42 | 8.03026E-38 | 0.995 | 0.999 |
| CDKN2C   | 13 | 0.97278815 | 1.31447E-98 | 2.39851E-94 | 0.734 | 0.202 |
| DRAP1    | 13 | 0.96753819 | 1.08205E-73 | 1.97441E-69 | 0.94  | 0.586 |
| SMC4     | 13 | 0.96059679 | 0           | 0           | 0.794 | 0.056 |
| SKA2     | 13 | 0.9513697  | 2.7408E-256 | 5.0011E-252 | 0.839 | 0.105 |
| TUBA1C   | 13 | 0.95069401 | 1.01803E-82 | 1.8576E-78  | 0.849 | 0.347 |
| CCNB1    | 13 | 0.94899451 | 4.1392E-224 | 7.5528E-220 | 0.523 | 0.042 |
| DUT      | 13 | 0.94705487 | 1.98513E-62 | 3.62226E-58 | 0.95  | 0.627 |

|           |    |            |             |             |       |       |
|-----------|----|------------|-------------|-------------|-------|-------|
| PRC1      | 13 | 0.94342337 | 0           | 0           | 0.749 | 0.014 |
| TMEM106C  | 13 | 0.94171101 | 1.07512E-81 | 1.96176E-77 | 0.849 | 0.35  |
| ARPC1B    | 13 | 0.93555212 | 2.89894E-55 | 5.2897E-51  | 0.844 | 0.473 |
| YWHAH     | 13 | 0.9323229  | 3.29249E-86 | 6.00781E-82 | 0.96  | 0.491 |
| TUBB4B    | 13 | 0.93230014 | 1.57414E-58 | 2.87234E-54 | 0.849 | 0.438 |
| DEK       | 13 | 0.92272074 | 2.97838E-77 | 5.43464E-73 | 0.96  | 0.634 |
| POLR2L    | 13 | 0.9158435  | 4.92482E-52 | 8.98631E-48 | 0.98  | 0.856 |
| ITGB1     | 13 | 0.91316253 | 1.83712E-75 | 3.35218E-71 | 0.94  | 0.517 |
| PRKCDBP   | 13 | 0.90962425 | 5.29016E-50 | 9.65295E-46 | 0.839 | 0.482 |
| MAD2L1    | 13 | 0.90951697 | 0           | 0           | 0.744 | 0.046 |
| CKAP2     | 13 | 0.90901555 | 0           | 0           | 0.698 | 0.019 |
| HMG3      | 13 | 0.90793886 | 2.0432E-63  | 3.72823E-59 | 0.799 | 0.411 |
| CDKN2D    | 13 | 0.90684254 | 6.3675E-145 | 1.1619E-140 | 0.673 | 0.112 |
| CYTL1     | 13 | 0.89811113 | 3.78319E-39 | 6.90318E-35 | 0.543 | 0.196 |
| RANBP1    | 13 | 0.88779011 | 9.47793E-54 | 1.72944E-49 | 0.864 | 0.543 |
| DTYMK     | 13 | 0.88644851 | 8.5804E-169 | 1.5657E-164 | 0.759 | 0.132 |
| MYL12A    | 13 | 0.87653913 | 2.89576E-63 | 5.2839E-59  | 0.935 | 0.554 |
| SH3BGRL3  | 13 | 0.87312814 | 9.41451E-50 | 1.71787E-45 | 0.99  | 0.978 |
| HMG1      | 13 | 0.86830921 | 7.7954E-57  | 1.42243E-52 | 0.975 | 0.833 |
| TNFRSF12A | 13 | 0.84709864 | 1.39754E-45 | 2.55009E-41 | 0.809 | 0.41  |
| CALU      | 13 | 0.84471423 | 2.09001E-70 | 3.81365E-66 | 0.95  | 0.58  |
| RAN       | 13 | 0.83743966 | 1.38953E-72 | 2.53547E-68 | 0.98  | 0.742 |
| DBI       | 13 | 0.83547374 | 2.68877E-62 | 4.90619E-58 | 0.935 | 0.736 |
| MYL6      | 13 | 0.83132947 | 8.58849E-64 | 1.56714E-59 | 1     | 0.93  |
| KPNA2     | 13 | 0.83063561 | 6.938E-233  | 1.266E-228  | 0.492 | 0.035 |
| TPX2      | 13 | 0.82475212 | 0           | 0           | 0.688 | 0.006 |
| MKI67     | 13 | 0.81536666 | 0           | 0           | 0.638 | 0.005 |
| PHLDA2    | 13 | 0.81429125 | 3.21072E-67 | 5.8586E-63  | 0.593 | 0.163 |
| LSM5      | 13 | 0.81032717 | 1.72155E-77 | 3.14131E-73 | 0.96  | 0.591 |
| LSM4      | 13 | 0.80883996 | 3.91962E-89 | 7.15214E-85 | 0.839 | 0.313 |
| CBX5      | 13 | 0.80841515 | 5.33746E-96 | 9.73927E-92 | 0.93  | 0.359 |
| RPL39L    | 13 | 0.80321702 | 6.1913E-103 | 1.12973E-98 | 0.799 | 0.235 |
| S100A10   | 13 | 0.80219905 | 8.0201E-47  | 1.46343E-42 | 1     | 0.98  |
| CYCS      | 13 | 0.78848039 | 2.97059E-59 | 5.42043E-55 | 0.884 | 0.489 |
| HSPA8     | 13 | 0.78621915 | 2.64371E-42 | 4.82397E-38 | 0.809 | 0.455 |
| HNRNPA2B1 | 13 | 0.78161993 | 8.76758E-55 | 1.59982E-50 | 0.905 | 0.57  |
| S100A11   | 13 | 0.77865885 | 4.12046E-50 | 7.51861E-46 | 0.99  | 0.918 |
| CCDC34    | 13 | 0.77736287 | 1.2892E-139 | 2.3524E-135 | 0.724 | 0.137 |
| UBE2T     | 13 | 0.7760133  | 0           | 0           | 0.653 | 0.02  |

|          |    |            |             |             |       |       |
|----------|----|------------|-------------|-------------|-------|-------|
| S100A4   | 13 | 0.77190733 | 2.51894E-25 | 4.59632E-21 | 0.91  | 0.773 |
| SRSF2    | 13 | 0.77161008 | 5.41841E-60 | 9.88697E-56 | 0.839 | 0.415 |
| CALM1    | 13 | 0.76929113 | 3.92271E-61 | 7.15777E-57 | 0.94  | 0.543 |
| HSP90AA1 | 13 | 0.76555178 | 5.31471E-37 | 9.69776E-33 | 0.955 | 0.744 |
| ARPC5    | 13 | 0.76510667 | 2.26974E-58 | 4.14159E-54 | 0.91  | 0.55  |
| COX8A    | 13 | 0.76328042 | 1.76899E-71 | 3.22788E-67 | 0.995 | 0.875 |
| RTN4     | 13 | 0.76034241 | 1.12804E-57 | 2.05833E-53 | 0.95  | 0.636 |
| MORF4L2  | 13 | 0.75551011 | 1.99789E-53 | 3.64555E-49 | 0.935 | 0.649 |
| CCNA2    | 13 | 0.75406805 | 0           | 0           | 0.598 | 0.009 |
| YWHAZ    | 13 | 0.7464054  | 2.10973E-67 | 3.84963E-63 | 0.955 | 0.57  |
| CALM3    | 13 | 0.74427912 | 3.21117E-54 | 5.85942E-50 | 0.92  | 0.643 |
| SNRPG    | 13 | 0.74317717 | 1.5595E-42  | 2.84561E-38 | 0.915 | 0.727 |
| CLIC1    | 13 | 0.74148415 | 4.25305E-55 | 7.76053E-51 | 0.975 | 0.835 |
| CDC20    | 13 | 0.73727942 | 0           | 0           | 0.503 | 0.006 |
| CYR61    | 13 | 0.73552408 | 7.95037E-19 | 1.4507E-14  | 0.683 | 0.417 |
| CDCA3    | 13 | 0.73015074 | 0           | 0           | 0.613 | 0.009 |
| KLF6     | 13 | 0.73010214 | 2.70273E-48 | 4.93168E-44 | 0.648 | 0.245 |
| SMS      | 13 | 0.72957691 | 2.18229E-48 | 3.98203E-44 | 0.869 | 0.528 |
| CRNDE    | 13 | 0.72683218 | 8.65048E-82 | 1.57845E-77 | 0.719 | 0.213 |
| CCNB2    | 13 | 0.72562485 | 0           | 0           | 0.578 | 0.012 |
| BCL7C    | 13 | 0.72255821 | 3.75705E-73 | 6.85549E-69 | 0.764 | 0.282 |
| AP2B1    | 13 | 0.71891836 | 1.82468E-71 | 3.32949E-67 | 0.779 | 0.284 |
| CLEC11A  | 13 | 0.71837043 | 3.55568E-43 | 6.48804E-39 | 0.814 | 0.448 |
| PLP2     | 13 | 0.71248215 | 2.36144E-52 | 4.30892E-48 | 0.975 | 0.774 |
| KIF20B   | 13 | 0.71096057 | 0           | 0           | 0.568 | 0.024 |
| ANXA2    | 13 | 0.7104787  | 2.09403E-36 | 3.82098E-32 | 0.98  | 0.853 |
| ANP32E   | 13 | 0.70733716 | 1.38408E-60 | 2.52553E-56 | 0.734 | 0.294 |
| COX20    | 13 | 0.70697576 | 3.77365E-59 | 6.88577E-55 | 0.93  | 0.634 |
| CD151    | 13 | 0.70346144 | 6.6496E-46  | 1.21335E-41 | 0.844 | 0.485 |
| CKAP4    | 13 | 0.70310666 | 9.68885E-62 | 1.76792E-57 | 0.774 | 0.31  |
| ANLN     | 13 | 0.70133685 | 0           | 0           | 0.628 | 0.006 |
| CENPA    | 13 | 0.69667547 | 0           | 0           | 0.442 | 0.004 |
| TXN      | 13 | 0.68871649 | 7.57409E-54 | 1.38204E-49 | 0.98  | 0.845 |
| H2AFX    | 13 | 0.68380517 | 1.8729E-126 | 3.4175E-122 | 0.583 | 0.094 |
| GGH      | 13 | 0.68274565 | 3.0628E-101 | 5.5887E-97  | 0.618 | 0.125 |
| CENPK    | 13 | 0.68177707 | 0           | 0           | 0.658 | 0.017 |
| FSTL1    | 13 | 0.67830629 | 1.79757E-54 | 3.28003E-50 | 0.774 | 0.345 |
| SERF2    | 13 | 0.67812228 | 9.28916E-54 | 1.69499E-49 | 1     | 1     |
| TUBB6    | 13 | 0.67621941 | 1.4036E-107 | 2.5612E-103 | 0.739 | 0.176 |

|         |    |            |             |             |       |       |
|---------|----|------------|-------------|-------------|-------|-------|
| NRP2    | 13 | 0.67296541 | 6.46964E-61 | 1.18051E-56 | 0.804 | 0.302 |
| ENPP1   | 13 | 0.66799973 | 5.95523E-14 | 1.08665E-09 | 0.523 | 0.315 |
| RACGAP1 | 13 | 0.66481771 | 0           | 0           | 0.618 | 0.023 |
| MALL    | 13 | 0.66376132 | 5.36088E-40 | 9.782E-36   | 0.633 | 0.271 |
| SRSF3   | 13 | 0.65782563 | 3.54059E-54 | 6.46052E-50 | 0.95  | 0.725 |
| ARPC2   | 13 | 0.65691467 | 3.84885E-45 | 7.02299E-41 | 0.955 | 0.793 |
| IGFBP3  | 13 | 0.65224478 | 1.38311E-27 | 2.52376E-23 | 0.638 | 0.31  |
| HNRNPH1 | 13 | 0.65145699 | 1.17444E-15 | 2.14301E-11 | 0.744 | 0.506 |
| FAM64A  | 13 | 0.64971947 | 0           | 0           | 0.588 | 0.005 |
| BOLA3   | 13 | 0.64969459 | 3.51138E-69 | 6.40721E-65 | 0.779 | 0.282 |
| RBX1    | 13 | 0.6482322  | 1.22245E-45 | 2.2306E-41  | 0.884 | 0.571 |
| CKLF    | 13 | 0.64513201 | 9.98119E-44 | 1.82127E-39 | 0.794 | 0.413 |
| S100A16 | 13 | 0.64459913 | 1.74748E-25 | 3.18863E-21 | 0.638 | 0.354 |
| ATP5J2  | 13 | 0.64345953 | 2.27961E-41 | 4.1596E-37  | 0.864 | 0.537 |
| MAP1B   | 13 | 0.64302698 | 8.54949E-63 | 1.56002E-58 | 0.492 | 0.116 |
| COL6A1  | 13 | 0.64193646 | 7.36056E-42 | 1.34308E-37 | 0.844 | 0.472 |
| BANF1   | 13 | 0.64128173 | 7.6378E-46  | 1.39367E-41 | 0.849 | 0.518 |
| PPIA    | 13 | 0.64105663 | 6.84652E-56 | 1.24928E-51 | 1     | 0.96  |
| ANAPC11 | 13 | 0.64090756 | 1.6666E-49  | 3.04105E-45 | 0.95  | 0.761 |
| PTP4A2  | 13 | 0.63746143 | 6.67211E-53 | 1.21746E-48 | 0.874 | 0.475 |
| GTSE1   | 13 | 0.63555442 | 0           | 0           | 0.558 | 0.011 |
| APOLD1  | 13 | 0.63516341 | 3.7299E-221 | 6.8059E-217 | 0.558 | 0.048 |
| ACTG1   | 13 | 0.63225568 | 6.12687E-29 | 1.11797E-24 | 0.995 | 0.956 |
| ACTN4   | 13 | 0.63208493 | 3.60358E-87 | 6.57545E-83 | 0.769 | 0.224 |
| HMOX1   | 13 | 0.63188963 | 6.76295E-26 | 1.23404E-21 | 0.467 | 0.189 |
| AURKB   | 13 | 0.63090618 | 0           | 0           | 0.553 | 0.005 |
| SAC3D1  | 13 | 0.6304874  | 1.0136E-185 | 1.8496E-181 | 0.603 | 0.068 |
| CTNNAL1 | 13 | 0.62972833 | 9.50521E-85 | 1.73442E-80 | 0.673 | 0.178 |
| CAPG    | 13 | 0.62874716 | 4.90239E-39 | 8.9454E-35  | 0.734 | 0.379 |
| INSIG1  | 13 | 0.62708963 | 3.15905E-33 | 5.76432E-29 | 0.759 | 0.417 |
| UQCC2   | 13 | 0.62681099 | 4.68465E-45 | 8.54808E-41 | 0.829 | 0.476 |
| OAZ1    | 13 | 0.62620933 | 1.3497E-52  | 2.4628E-48  | 1     | 0.997 |
| ERH     | 13 | 0.62603474 | 8.84909E-45 | 1.61469E-40 | 0.93  | 0.716 |
| TPM3    | 13 | 0.62500945 | 1.55757E-57 | 2.8421E-53  | 0.779 | 0.333 |
| AP2S1   | 13 | 0.62175257 | 9.8452E-45  | 1.79645E-40 | 0.864 | 0.534 |
| ZWINT   | 13 | 0.6177711  | 0           | 0           | 0.598 | 0.033 |
| YBX1    | 13 | 0.61732989 | 3.34231E-46 | 6.09871E-42 | 1     | 0.982 |
| HMGB3   | 13 | 0.61545252 | 0           | 0           | 0.563 | 0.028 |
| SPATS2L | 13 | 0.61338518 | 2.02184E-44 | 3.68926E-40 | 0.799 | 0.439 |

|             |    |            |             |             |       |       |
|-------------|----|------------|-------------|-------------|-------|-------|
| PDGFRA      | 13 | 0.61219936 | 3.63562E-51 | 6.63392E-47 | 0.693 | 0.265 |
| PGF         | 13 | 0.61204896 | 9.64511E-72 | 1.75994E-67 | 0.337 | 0.05  |
| ASPM        | 13 | 0.61204859 | 0           | 0           | 0.487 | 0.003 |
| RRBP1       | 13 | 0.61145917 | 1.89411E-48 | 3.45619E-44 | 0.819 | 0.413 |
| SRM         | 13 | 0.60969367 | 9.08848E-31 | 1.65837E-26 | 0.683 | 0.369 |
| TAGLN2      | 13 | 0.60822297 | 7.48801E-37 | 1.36634E-32 | 0.925 | 0.63  |
| DEPDC1      | 13 | 0.60792875 | 0           | 0           | 0.503 | 0.004 |
| PGP         | 13 | 0.60299396 | 3.5876E-160 | 6.5462E-156 | 0.573 | 0.071 |
| RND3        | 13 | 0.6007073  | 5.15172E-16 | 9.40035E-12 | 0.392 | 0.178 |
| KIF5B       | 13 | 0.6003433  | 1.33872E-59 | 2.44276E-55 | 0.714 | 0.262 |
| PTTG1IP     | 13 | 0.59756591 | 1.95224E-42 | 3.56226E-38 | 0.844 | 0.469 |
| FKBP1A      | 13 | 0.59618092 | 1.28186E-29 | 2.339E-25   | 0.759 | 0.491 |
| VCAN        | 13 | 0.59517296 | 2.25258E-30 | 4.11029E-26 | 0.809 | 0.432 |
| DIXDC1      | 13 | 0.59464346 | 1.62742E-90 | 2.96955E-86 | 0.623 | 0.142 |
| SNRPB       | 13 | 0.59338467 | 8.23221E-43 | 1.50213E-38 | 0.709 | 0.337 |
| EMP3        | 13 | 0.59247096 | 2.138E-33   | 3.90122E-29 | 0.99  | 0.874 |
| RAD21       | 13 | 0.59020049 | 1.60119E-72 | 2.9217E-68  | 0.789 | 0.278 |
| MGLL        | 13 | 0.58674693 | 4.93516E-67 | 9.00518E-63 | 0.588 | 0.155 |
| HMMR        | 13 | 0.58603643 | 0           | 0           | 0.553 | 0.003 |
| EIF4G2      | 13 | 0.58540455 | 1.42218E-36 | 2.59505E-32 | 0.864 | 0.575 |
| C9orf3      | 13 | 0.58304313 | 5.23507E-34 | 9.55243E-30 | 0.734 | 0.4   |
| LOXL1       | 13 | 0.58035098 | 1.66981E-77 | 3.0469E-73  | 0.407 | 0.068 |
| PTMA        | 13 | 0.58031741 | 1.82207E-45 | 3.32473E-41 | 1     | 1     |
| COL5A2      | 13 | 0.58007599 | 2.18091E-41 | 3.9795E-37  | 0.819 | 0.405 |
| FHL2        | 13 | 0.57981251 | 7.38449E-55 | 1.34745E-50 | 0.608 | 0.191 |
| CENPM       | 13 | 0.57930666 | 0           | 0           | 0.528 | 0.014 |
| TNC         | 13 | 0.57922231 | 1.0045E-117 | 1.8328E-113 | 0.563 | 0.086 |
| COL5A1      | 13 | 0.57403943 | 1.1222E-68  | 2.04768E-64 | 0.638 | 0.177 |
| FOSL1       | 13 | 0.57399639 | 3.19118E-42 | 5.82294E-38 | 0.568 | 0.186 |
| MZT2B       | 13 | 0.57144177 | 7.53271E-54 | 1.37449E-49 | 0.995 | 0.957 |
| SPC25       | 13 | 0.57072844 | 0           | 0           | 0.508 | 0.002 |
| PGAM1       | 13 | 0.57066831 | 8.37937E-41 | 1.52898E-36 | 0.95  | 0.784 |
| SMC2        | 13 | 0.56955892 | 1.2915E-166 | 2.3565E-162 | 0.618 | 0.078 |
| CEP55       | 13 | 0.56759683 | 0           | 0           | 0.543 | 0.003 |
| MIR4435-2HG | 13 | 0.56698413 | 1.88913E-61 | 3.4471E-57  | 0.693 | 0.228 |
| HNRNPAB     | 13 | 0.56689223 | 1.63631E-71 | 2.98578E-67 | 0.558 | 0.139 |
| CENPH       | 13 | 0.56050485 | 1.2403E-232 | 2.2632E-228 | 0.598 | 0.052 |
| TPGS2       | 13 | 0.55868941 | 8.41308E-61 | 1.53514E-56 | 0.729 | 0.27  |
| CENPN       | 13 | 0.55452651 | 0           | 0           | 0.628 | 0.032 |

|          |    |            |             |             |       |       |
|----------|----|------------|-------------|-------------|-------|-------|
| HP1BP3   | 13 | 0.55443402 | 2.63225E-46 | 4.80307E-42 | 0.784 | 0.391 |
| SUMO3    | 13 | 0.55349115 | 1.64875E-43 | 3.00848E-39 | 0.894 | 0.571 |
| C7orf73  | 13 | 0.553452   | 7.02101E-27 | 1.28112E-22 | 0.889 | 0.745 |
| CBX1     | 13 | 0.55222767 | 2.94263E-54 | 5.36943E-50 | 0.759 | 0.305 |
| UQCRCQ   | 13 | 0.55138375 | 7.74917E-36 | 1.41399E-31 | 0.975 | 0.92  |
| SGOL2    | 13 | 0.55105668 | 0           | 0           | 0.513 | 0.027 |
| NUDT1    | 13 | 0.55088933 | 7.57578E-94 | 1.38235E-89 | 0.698 | 0.168 |
| EMC9     | 13 | 0.55051872 | 5.23176E-93 | 9.5464E-89  | 0.729 | 0.182 |
| RCAN1    | 13 | 0.54912583 | 1.85249E-47 | 3.38024E-43 | 0.402 | 0.095 |
| NT5DC2   | 13 | 0.54902537 | 1.27554E-75 | 2.32747E-71 | 0.543 | 0.125 |
| HINT1    | 13 | 0.54868868 | 2.34335E-51 | 4.2759E-47  | 1     | 0.983 |
| MYDGF    | 13 | 0.54861957 | 1.33109E-24 | 2.42883E-20 | 0.925 | 0.775 |
| MYL12B   | 13 | 0.54786137 | 1.826E-31   | 3.3319E-27  | 0.874 | 0.607 |
| POSTN    | 13 | 0.54785012 | 2.71629E-25 | 4.95642E-21 | 0.161 | 0.031 |
| ATP5G3   | 13 | 0.54644083 | 1.53305E-35 | 2.79735E-31 | 0.92  | 0.687 |
| COL3A1   | 13 | 0.54229822 | 8.62932E-37 | 1.57459E-32 | 0.593 | 0.228 |
| CKB      | 13 | 0.54209393 | 8.7051E-35  | 1.58842E-30 | 0.407 | 0.126 |
| MLF2     | 13 | 0.54060508 | 1.36914E-35 | 2.49827E-31 | 0.764 | 0.45  |
| CTHRC1   | 13 | 0.53970212 | 1.42456E-22 | 2.59939E-18 | 0.573 | 0.276 |
| MT-CYB   | 13 | 0.53892676 | 3.11641E-13 | 5.68651E-09 | 0.829 | 0.721 |
| ITGB1BP1 | 13 | 0.53875739 | 7.16175E-37 | 1.3068E-32  | 0.804 | 0.448 |
| SNRPD1   | 13 | 0.53520386 | 3.49956E-37 | 6.38564E-33 | 0.869 | 0.572 |
| ATP1B1   | 13 | 0.53347061 | 4.97635E-42 | 9.08034E-38 | 0.503 | 0.161 |
| SUMO2    | 13 | 0.53313846 | 4.55112E-49 | 8.30443E-45 | 1     | 0.982 |
| TMPO     | 13 | 0.53264739 | 6.3285E-137 | 1.1548E-132 | 0.528 | 0.069 |
| MYEOV2   | 13 | 0.53258264 | 3.8683E-27  | 7.05849E-23 | 0.894 | 0.716 |
| SLC9A3R2 | 13 | 0.53151434 | 7.09137E-19 | 1.29396E-14 | 0.548 | 0.301 |
| TFDP1    | 13 | 0.52912604 | 3.69799E-86 | 6.74773E-82 | 0.583 | 0.128 |
| PTN      | 13 | 0.52905512 | 2.0703E-147 | 3.7778E-143 | 0.452 | 0.046 |
| RPA3     | 13 | 0.52843383 | 1.45574E-31 | 2.65628E-27 | 0.824 | 0.528 |
| MT-CO3   | 13 | 0.52733433 | 4.27974E-16 | 7.80924E-12 | 0.925 | 0.887 |
| DNMT1    | 13 | 0.52716425 | 3.0775E-172 | 5.6156E-168 | 0.538 | 0.057 |
| GNAI2    | 13 | 0.52567001 | 2.6943E-49  | 4.91629E-45 | 0.729 | 0.298 |
| CCND1    | 13 | 0.52494666 | 6.22223E-20 | 1.13537E-15 | 0.543 | 0.278 |
| YWHAB    | 13 | 0.52044891 | 4.14994E-42 | 7.57239E-38 | 0.779 | 0.387 |
| H3F3A    | 13 | 0.52009707 | 6.78109E-32 | 1.23734E-27 | 0.995 | 0.959 |
| MAP4K4   | 13 | 0.51930554 | 1.41936E-94 | 2.58991E-90 | 0.543 | 0.101 |
| CDT1     | 13 | 0.51886569 | 5.816E-292  | 1.0612E-287 | 0.377 | 0.015 |
| HCFC1R1  | 13 | 0.51874393 | 1.18949E-27 | 2.17047E-23 | 0.889 | 0.669 |

|          |    |            |             |             |       |       |
|----------|----|------------|-------------|-------------|-------|-------|
| C11orf24 | 13 | 0.51854292 | 2.09895E-66 | 3.82996E-62 | 0.518 | 0.126 |
| CDC44    | 13 | 0.51827732 | 1.9076E-102 | 3.48074E-98 | 0.578 | 0.108 |
| MSN      | 13 | 0.51569252 | 6.06182E-68 | 1.1061E-63  | 0.633 | 0.179 |
| MT-CO2   | 13 | 0.51562291 | 1.60253E-16 | 2.92414E-12 | 0.92  | 0.93  |
| STRA13   | 13 | 0.51496893 | 1.08806E-36 | 1.98538E-32 | 0.693 | 0.327 |
| FUS      | 13 | 0.51411589 | 4.51448E-35 | 8.23758E-31 | 0.804 | 0.442 |
| CARHSP1  | 13 | 0.51393725 | 1.30104E-32 | 2.374E-28   | 0.849 | 0.547 |
| BZW1     | 13 | 0.51303287 | 1.85082E-22 | 3.37719E-18 | 0.879 | 0.619 |
| GUK1     | 13 | 0.51291021 | 6.20375E-35 | 1.132E-30   | 0.975 | 0.885 |
| TMED9    | 13 | 0.50946532 | 1.37713E-22 | 2.51286E-18 | 0.814 | 0.622 |
| YWHAQ    | 13 | 0.5091055  | 1.13288E-28 | 2.06717E-24 | 0.915 | 0.701 |
| PTRF     | 13 | 0.50850111 | 1.54951E-26 | 2.82738E-22 | 0.814 | 0.496 |
| RHOA     | 13 | 0.50773134 | 1.1298E-39  | 2.06155E-35 | 0.975 | 0.838 |
| IKBIP    | 13 | 0.50636037 | 6.98349E-58 | 1.27428E-53 | 0.734 | 0.267 |
| C4orf48  | 13 | 0.50634854 | 4.57949E-32 | 8.35619E-28 | 0.719 | 0.363 |
| CIB1     | 13 | 0.50494888 | 7.78318E-28 | 1.4202E-23  | 0.844 | 0.563 |
| PART1    | 13 | 0.50385647 | 3.34393E-55 | 6.10167E-51 | 0.482 | 0.123 |
| DYNLT1   | 13 | 0.50319452 | 2.94243E-27 | 5.36906E-23 | 0.749 | 0.487 |
| DNAJC9   | 13 | 0.50306271 | 4.31992E-96 | 7.88256E-92 | 0.568 | 0.109 |
| MAZ      | 13 | 0.50255044 | 1.14796E-68 | 2.09468E-64 | 0.658 | 0.193 |
| AAMDC    | 13 | 0.50145014 | 6.26004E-55 | 1.14227E-50 | 0.704 | 0.257 |
| BUB3     | 13 | 0.49640623 | 2.07682E-35 | 3.78958E-31 | 0.704 | 0.358 |
| HJURP    | 13 | 0.49631645 | 0           | 0           | 0.452 | 0.003 |
| ITGAE    | 13 | 0.49535034 | 2.30914E-60 | 4.21349E-56 | 0.643 | 0.2   |
| PHPT1    | 13 | 0.49525788 | 3.06965E-32 | 5.60119E-28 | 0.945 | 0.757 |
| LMO4     | 13 | 0.49510306 | 2.63302E-31 | 4.80446E-27 | 0.638 | 0.29  |
| MINOS1   | 13 | 0.49338308 | 1.3034E-28  | 2.37831E-24 | 0.894 | 0.637 |
| MT-CO1   | 13 | 0.49163129 | 7.75824E-16 | 1.41565E-11 | 0.945 | 0.944 |
| MT-ATP6  | 13 | 0.49122576 | 4.79115E-15 | 8.74242E-11 | 0.905 | 0.815 |
| NAA38    | 13 | 0.48979631 | 1.01709E-24 | 1.85589E-20 | 0.834 | 0.649 |
| LSP1     | 13 | 0.4893634  | 4.21267E-22 | 7.68687E-18 | 0.633 | 0.338 |
| DDX39A   | 13 | 0.48929198 | 2.18106E-70 | 3.97978E-66 | 0.538 | 0.125 |
| ZNF367   | 13 | 0.48912745 | 0           | 0           | 0.387 | 0.009 |
| GNG11    | 13 | 0.48873672 | 1.74803E-34 | 3.18962E-30 | 0.613 | 0.271 |
| SPARC    | 13 | 0.48828728 | 1.57201E-21 | 2.86845E-17 | 0.829 | 0.591 |
| MTDH     | 13 | 0.48780544 | 1.97549E-26 | 3.60468E-22 | 0.879 | 0.65  |
| CAPNS1   | 13 | 0.48652521 | 6.30362E-48 | 1.15022E-43 | 0.648 | 0.238 |
| SRP9     | 13 | 0.48494576 | 3.05645E-32 | 5.57711E-28 | 0.95  | 0.747 |
| PCNA     | 13 | 0.48383963 | 2.17148E-44 | 3.96229E-40 | 0.432 | 0.117 |

|          |    |            |             |             |       |       |
|----------|----|------------|-------------|-------------|-------|-------|
| LOX      | 13 | 0.48370883 | 4.35964E-39 | 7.95504E-35 | 0.648 | 0.25  |
| SFPQ     | 13 | 0.48204592 | 5.22581E-40 | 9.53553E-36 | 0.663 | 0.285 |
| DNAJB1   | 13 | 0.48094129 | 9.98828E-17 | 1.82256E-12 | 0.482 | 0.238 |
| AURKAIP1 | 13 | 0.48072698 | 9.90838E-29 | 1.80798E-24 | 0.859 | 0.633 |
| SLC16A3  | 13 | 0.47761623 | 2.98096E-30 | 5.43935E-26 | 0.809 | 0.47  |
| HSPB1    | 13 | 0.4773925  | 1.01802E-21 | 1.85757E-17 | 0.925 | 0.705 |
| NME1     | 13 | 0.47666196 | 6.52393E-34 | 1.19042E-29 | 0.618 | 0.272 |
| NQO1     | 13 | 0.47382392 | 9.14993E-81 | 1.66959E-76 | 0.503 | 0.096 |
| CMC2     | 13 | 0.4735506  | 8.3811E-101 | 1.52931E-96 | 0.573 | 0.106 |
| NREP     | 13 | 0.47314814 | 1.48339E-29 | 2.70674E-25 | 0.573 | 0.253 |
| ARL4A    | 13 | 0.47289478 | 1.6258E-109 | 2.9666E-105 | 0.447 | 0.06  |
| DHFR     | 13 | 0.47274252 | 2.63E-109   | 4.7989E-105 | 0.477 | 0.069 |
| RNASEH2A | 13 | 0.47146171 | 2.0369E-103 | 3.7168E-99  | 0.503 | 0.079 |
| ATP5G1   | 13 | 0.46956819 | 1.65601E-28 | 3.02172E-24 | 0.739 | 0.427 |
| ARPC1A   | 13 | 0.46863749 | 1.20142E-24 | 2.19223E-20 | 0.789 | 0.522 |
| CBX3     | 13 | 0.46847222 | 1.79107E-37 | 3.26817E-33 | 0.955 | 0.68  |
| TGFBI    | 13 | 0.46812667 | 7.497E-18   | 1.36798E-13 | 0.673 | 0.412 |
| ZDHHC12  | 13 | 0.46802288 | 2.10155E-44 | 3.83469E-40 | 0.573 | 0.2   |
| SIVA1    | 13 | 0.46606336 | 5.90118E-26 | 1.07679E-21 | 0.915 | 0.81  |
| EI24     | 13 | 0.46516056 | 8.92307E-34 | 1.62819E-29 | 0.744 | 0.391 |
| ATP1B3   | 13 | 0.46307946 | 2.09747E-32 | 3.82724E-28 | 0.668 | 0.313 |
| PIN1     | 13 | 0.46268547 | 1.12549E-39 | 2.05368E-35 | 0.673 | 0.306 |
| CDC42    | 13 | 0.46239465 | 3.41008E-18 | 6.22238E-14 | 0.844 | 0.654 |
| CRIP2    | 13 | 0.46186668 | 8.42288E-33 | 1.53692E-28 | 0.824 | 0.423 |
| RHOC     | 13 | 0.46081579 | 5.70743E-21 | 1.04143E-16 | 0.915 | 0.782 |
| MRPL52   | 13 | 0.46058638 | 3.53236E-28 | 6.4455E-24  | 0.824 | 0.507 |
| GNG5     | 13 | 0.46054329 | 4.53072E-29 | 8.26721E-25 | 0.864 | 0.629 |
| NEDD8    | 13 | 0.46028316 | 1.66082E-27 | 3.0305E-23  | 0.91  | 0.718 |
| TEX30    | 13 | 0.45992811 | 1.70827E-68 | 3.11708E-64 | 0.603 | 0.157 |
| PDXK     | 13 | 0.4580593  | 4.49799E-30 | 8.20748E-26 | 0.573 | 0.257 |
| NT5E     | 13 | 0.45738586 | 5.21454E-27 | 9.51497E-23 | 0.693 | 0.361 |
| RDX      | 13 | 0.45569261 | 2.36604E-35 | 4.31732E-31 | 0.839 | 0.486 |
| MXD3     | 13 | 0.45525647 | 1.6055E-304 | 2.9295E-300 | 0.407 | 0.017 |
| ACTN1    | 13 | 0.45390531 | 1.15853E-43 | 2.11397E-39 | 0.683 | 0.27  |
| PMEPA1   | 13 | 0.45357157 | 4.32999E-23 | 7.90093E-19 | 0.513 | 0.244 |
| ISOC2    | 13 | 0.45345237 | 6.51051E-41 | 1.18797E-36 | 0.603 | 0.241 |
| BLOC1S1  | 13 | 0.45339631 | 3.91116E-30 | 7.13669E-26 | 0.814 | 0.513 |
| PHF19    | 13 | 0.45149287 | 1.9952E-158 | 3.6407E-154 | 0.487 | 0.05  |
| HRAS     | 13 | 0.45144349 | 2.87396E-48 | 5.24412E-44 | 0.563 | 0.185 |



|             |    |            |             |             |       |       |
|-------------|----|------------|-------------|-------------|-------|-------|
| LSM3        | 13 | 0.45110377 | 8.08533E-30 | 1.47533E-25 | 0.754 | 0.446 |
| LY6E        | 13 | 0.44964734 | 4.5326E-24  | 8.27063E-20 | 0.789 | 0.469 |
| ADAM12      | 13 | 0.44781731 | 4.3663E-139 | 7.9671E-135 | 0.442 | 0.047 |
| NFIC        | 13 | 0.44670188 | 6.15164E-26 | 1.12249E-21 | 0.734 | 0.428 |
| ARHGAP11A   | 13 | 0.44631119 | 0           | 0           | 0.452 | 0.009 |
| SSNA1       | 13 | 0.44432971 | 9.64614E-36 | 1.76013E-31 | 0.704 | 0.345 |
| CTSL        | 13 | 0.44332206 | 2.87516E-08 | 0.00052463  | 0.754 | 0.572 |
| DIAPH3      | 13 | 0.44292516 | 0           | 0           | 0.417 | 0.007 |
| ARHGDIA     | 13 | 0.44237044 | 7.33156E-26 | 1.33779E-21 | 0.739 | 0.428 |
| FOXM1       | 13 | 0.44231703 | 0           | 0           | 0.442 | 0.01  |
| HIGD1A      | 13 | 0.44216562 | 8.43723E-35 | 1.53954E-30 | 0.683 | 0.333 |
| MT-ND1      | 13 | 0.44207063 | 9.61044E-13 | 1.75362E-08 | 0.779 | 0.647 |
| H3F3B       | 13 | 0.44131902 | 9.62933E-40 | 1.75706E-35 | 1     | 0.999 |
| AHNAK       | 13 | 0.44087167 | 5.16204E-24 | 9.41917E-20 | 0.764 | 0.475 |
| SLC25A5     | 13 | 0.43979948 | 4.43934E-19 | 8.10047E-15 | 0.744 | 0.52  |
| IQGAP3      | 13 | 0.43967633 | 1.1333E-271 | 2.0679E-267 | 0.362 | 0.015 |
| SAP30       | 13 | 0.43935462 | 2.14419E-37 | 3.91251E-33 | 0.648 | 0.275 |
| PXMP2       | 13 | 0.43897504 | 1.7545E-50  | 3.20144E-46 | 0.543 | 0.163 |
| LRRC59      | 13 | 0.43829284 | 1.81682E-27 | 3.31515E-23 | 0.593 | 0.291 |
| CALR        | 13 | 0.43770525 | 1.42564E-18 | 2.60136E-14 | 0.839 | 0.669 |
| MARCKS      | 13 | 0.43688108 | 3.9097E-42  | 7.13403E-38 | 0.437 | 0.123 |
| NUDCD2      | 13 | 0.43607    | 3.28768E-37 | 5.99902E-33 | 0.653 | 0.29  |
| ENO1        | 13 | 0.43442101 | 5.67875E-10 | 1.0362E-05  | 1     | 0.984 |
| 44450       | 13 | 0.43220664 | 1.53626E-50 | 2.80322E-46 | 0.533 | 0.155 |
| GTF3A       | 13 | 0.43112447 | 6.3465E-23  | 1.15805E-18 | 0.678 | 0.399 |
| LINC00152   | 13 | 0.43088721 | 3.37184E-31 | 6.1526E-27  | 0.709 | 0.351 |
| HDGF        | 13 | 0.43044304 | 1.3073E-41  | 2.38543E-37 | 0.603 | 0.228 |
| RP11-14N7.2 | 13 | 0.42983953 | 2.43519E-40 | 4.4435E-36  | 0.523 | 0.174 |
| SEPT15      | 13 | 0.4293668  | 3.99918E-16 | 7.2973E-12  | 0.759 | 0.541 |
| B4GALT1     | 13 | 0.42935168 | 9.11516E-18 | 1.66324E-13 | 0.302 | 0.115 |
| MYH9        | 13 | 0.42838944 | 2.6374E-99  | 4.81239E-95 | 0.497 | 0.08  |
| PRADC1      | 13 | 0.42696413 | 2.93896E-68 | 5.36273E-64 | 0.518 | 0.119 |
| NTAN1       | 13 | 0.4263452  | 7.56037E-44 | 1.37954E-39 | 0.603 | 0.221 |
| ARPC5L      | 13 | 0.42568192 | 4.33759E-38 | 7.91479E-34 | 0.588 | 0.232 |
| KDELR2      | 13 | 0.42560021 | 4.38448E-21 | 8.00036E-17 | 0.925 | 0.858 |
| UBB         | 13 | 0.42550584 | 3.77224E-18 | 6.8832E-14  | 0.95  | 0.857 |
| CAPZA1      | 13 | 0.42530855 | 1.35376E-25 | 2.4702E-21  | 0.668 | 0.372 |
| TPM2        | 13 | 0.4250511  | 3.14449E-18 | 5.73774E-14 | 0.809 | 0.569 |
| PRG4        | 13 | 0.42497425 | 2.33372E-09 | 4.25834E-05 | 0.508 | 0.314 |

|          |    |            |             |             |       |       |
|----------|----|------------|-------------|-------------|-------|-------|
| CRELD2   | 13 | 0.42302272 | 3.72691E-32 | 6.8005E-28  | 0.563 | 0.226 |
| EMP2     | 13 | 0.42106266 | 8.7428E-31  | 1.5953E-26  | 0.794 | 0.434 |
| UBALD2   | 13 | 0.42027099 | 2.07045E-74 | 3.77795E-70 | 0.482 | 0.097 |
| GLRX5    | 13 | 0.42019493 | 9.2272E-45  | 1.68369E-40 | 0.528 | 0.172 |
| AP3S1    | 13 | 0.41963911 | 5.35332E-27 | 9.76821E-23 | 0.945 | 0.776 |
| CORO1C   | 13 | 0.41961132 | 3.93749E-53 | 7.18475E-49 | 0.523 | 0.146 |
| RBM8A    | 13 | 0.41959485 | 1.25422E-23 | 2.28857E-19 | 0.814 | 0.564 |
| UBE2N    | 13 | 0.41841683 | 4.18848E-31 | 7.64271E-27 | 0.673 | 0.321 |
| WDR34    | 13 | 0.41763309 | 1.46496E-42 | 2.67312E-38 | 0.568 | 0.201 |
| HSPE1    | 13 | 0.41577068 | 1.5424E-17  | 2.81442E-13 | 0.829 | 0.633 |
| KPNB1    | 13 | 0.41536402 | 7.18097E-39 | 1.31031E-34 | 0.688 | 0.299 |
| TPI1     | 13 | 0.41432593 | 1.9908E-26  | 3.63261E-22 | 1     | 0.989 |
| UAP1     | 13 | 0.41395401 | 8.96587E-30 | 1.636E-25   | 0.719 | 0.366 |
| NUF2     | 13 | 0.41387711 | 0           | 0           | 0.422 | 0.003 |
| SET      | 13 | 0.41371867 | 4.26434E-11 | 7.78115E-07 | 0.829 | 0.748 |
| CAV1     | 13 | 0.41366154 | 3.20546E-13 | 5.84901E-09 | 0.889 | 0.727 |
| HNRNPA3  | 13 | 0.4104754  | 3.30264E-26 | 6.02633E-22 | 0.819 | 0.525 |
| HNRNPR   | 13 | 0.40971201 | 1.93349E-27 | 3.52804E-23 | 0.618 | 0.306 |
| TCEB1    | 13 | 0.40926703 | 2.30676E-26 | 4.20914E-22 | 0.864 | 0.599 |
| FSCN1    | 13 | 0.40863174 | 4.05345E-43 | 7.39632E-39 | 0.503 | 0.158 |
| SMTN     | 13 | 0.40822028 | 2.46256E-98 | 4.49343E-94 | 0.482 | 0.076 |
| MAD2L2   | 13 | 0.40813849 | 2.76137E-35 | 5.03867E-31 | 0.623 | 0.264 |
| RALBP1   | 13 | 0.40764725 | 1.28458E-33 | 2.34397E-29 | 0.638 | 0.284 |
| NUCB2    | 13 | 0.40697046 | 1.22833E-21 | 2.24133E-17 | 0.734 | 0.449 |
| MRPL23   | 13 | 0.40605219 | 2.26628E-26 | 4.13528E-22 | 0.709 | 0.406 |
| PDAP1    | 13 | 0.40554163 | 2.2947E-17  | 4.18714E-13 | 0.704 | 0.459 |
| CD59     | 13 | 0.40472637 | 4.20112E-20 | 7.66578E-16 | 0.985 | 0.94  |
| CCDC167  | 13 | 0.404718   | 8.24054E-51 | 1.50365E-46 | 0.588 | 0.187 |
| BAX      | 13 | 0.4040103  | 2.07589E-25 | 3.78787E-21 | 0.668 | 0.367 |
| TMEM14A  | 13 | 0.40371543 | 2.85246E-26 | 5.20488E-22 | 0.698 | 0.384 |
| CTNNBIP1 | 13 | 0.40365899 | 9.05673E-37 | 1.65258E-32 | 0.548 | 0.206 |
| SEPT15   | 13 | 0.4022413  | 8.13006E-33 | 1.48349E-28 | 0.714 | 0.335 |
| PRMT2    | 13 | 0.40128287 | 7.06169E-26 | 1.28855E-21 | 0.824 | 0.515 |
| WHSC1    | 13 | 0.40126447 | 5.1192E-243 | 9.341E-239  | 0.437 | 0.025 |
| TMEM54   | 13 | 0.40124684 | 1.75772E-56 | 3.20731E-52 | 0.543 | 0.147 |
| SMOC1    | 13 | 0.40109328 | 6.26614E-31 | 1.14338E-26 | 0.598 | 0.258 |
| UBE2E3   | 13 | 0.40097964 | 4.14182E-25 | 7.55757E-21 | 0.809 | 0.53  |
| LSM7     | 13 | 0.40094913 | 7.68526E-21 | 1.40233E-16 | 0.754 | 0.508 |
| ARL6IP6  | 13 | 0.40062989 | 9.22934E-34 | 1.68408E-29 | 0.548 | 0.214 |

|               |    |            |             |             |       |       |
|---------------|----|------------|-------------|-------------|-------|-------|
| NFIX          | 13 | 0.40027785 | 3.41358E-37 | 6.22877E-33 | 0.603 | 0.235 |
| CAV2          | 13 | 0.4002545  | 9.59812E-21 | 1.75137E-16 | 0.688 | 0.414 |
| TCF19         | 13 | 0.39959313 | 1.0641E-235 | 1.9416E-231 | 0.372 | 0.018 |
| C19orf48      | 13 | 0.39956633 | 1.08088E-37 | 1.97228E-33 | 0.518 | 0.182 |
| CACYBP        | 13 | 0.39935877 | 3.79085E-27 | 6.91716E-23 | 0.673 | 0.355 |
| RUVBL2        | 13 | 0.39891981 | 2.62999E-48 | 4.79894E-44 | 0.558 | 0.174 |
| RASSF1        | 13 | 0.39852935 | 4.84035E-36 | 8.83219E-32 | 0.472 | 0.159 |
| ARF6          | 13 | 0.39758496 | 5.37579E-27 | 9.8092E-23  | 0.889 | 0.554 |
| HPCAL1        | 13 | 0.39734374 | 1.05091E-35 | 1.9176E-31  | 0.482 | 0.167 |
| NDUFS6        | 13 | 0.39714465 | 5.58368E-21 | 1.01885E-16 | 0.693 | 0.419 |
| MTPN          | 13 | 0.39609582 | 2.5984E-28  | 4.74131E-24 | 0.648 | 0.321 |
| TROAP         | 13 | 0.39556363 | 0           | 0           | 0.402 | 0.005 |
| TXNDC17       | 13 | 0.39554558 | 1.79312E-23 | 3.27191E-19 | 0.698 | 0.399 |
| LMNB2         | 13 | 0.39547962 | 1.9417E-135 | 3.5429E-131 | 0.407 | 0.041 |
| ANKRD28       | 13 | 0.39530691 | 5.83558E-28 | 1.06482E-23 | 0.603 | 0.281 |
| KIFC1         | 13 | 0.39518282 | 0           | 0           | 0.387 | 0.008 |
| MT-ND4        | 13 | 0.39393721 | 7.92078E-17 | 1.4453E-12  | 0.945 | 0.945 |
| TOMM5         | 13 | 0.39352145 | 1.7121E-24  | 3.12408E-20 | 0.653 | 0.357 |
| AURKA         | 13 | 0.39292635 | 0           | 0           | 0.312 | 0.004 |
| KMT5A         | 13 | 0.39271612 | 1.58652E-38 | 2.89493E-34 | 0.422 | 0.125 |
| C20orf24      | 13 | 0.39265205 | 1.23267E-28 | 2.24926E-24 | 0.558 | 0.254 |
| FLNA          | 13 | 0.39217591 | 3.42151E-47 | 6.24323E-43 | 0.508 | 0.149 |
| NAV2          | 13 | 0.3915127  | 5.82906E-83 | 1.06363E-78 | 0.397 | 0.061 |
| PRELID1       | 13 | 0.39109513 | 1.90985E-11 | 3.4849E-07  | 0.814 | 0.734 |
| TMEM107       | 13 | 0.39005174 | 1.06269E-27 | 1.9391E-23  | 0.503 | 0.212 |
| SLC20A1       | 13 | 0.38940399 | 9.41462E-26 | 1.71789E-21 | 0.548 | 0.243 |
| C5orf15       | 13 | 0.3891403  | 1.21932E-22 | 2.22489E-18 | 0.683 | 0.383 |
| RCN2          | 13 | 0.38894842 | 1.6143E-18  | 2.9456E-14  | 0.854 | 0.646 |
| C9orf142      | 13 | 0.38892932 | 3.29261E-32 | 6.00802E-28 | 0.598 | 0.258 |
| SLBP          | 13 | 0.38879238 | 5.68843E-13 | 1.03797E-08 | 0.457 | 0.267 |
| PSMC3IP       | 13 | 0.38871437 | 2.8889E-110 | 5.2714E-106 | 0.422 | 0.053 |
| CDC25B        | 13 | 0.38870953 | 2.60503E-85 | 4.7534E-81  | 0.457 | 0.078 |
| CNN3          | 13 | 0.38662    | 4.19189E-24 | 7.64894E-20 | 0.633 | 0.319 |
| ARL2          | 13 | 0.38653383 | 2.64671E-24 | 4.82946E-20 | 0.764 | 0.487 |
| FDPS          | 13 | 0.38605438 | 4.64235E-29 | 8.4709E-25  | 0.538 | 0.229 |
| RP5-1198O20.4 | 13 | 0.38559947 | 1.8282E-226 | 3.3358E-222 | 0.412 | 0.024 |
| LRR1          | 13 | 0.38465676 | 3.6676E-178 | 6.6923E-174 | 0.432 | 0.035 |
| KIF23         | 13 | 0.38391728 | 0           | 0           | 0.352 | 0.003 |
| GNB1          | 13 | 0.38379988 | 2.30107E-32 | 4.19875E-28 | 0.543 | 0.218 |

|          |    |            |             |             |       |       |
|----------|----|------------|-------------|-------------|-------|-------|
| MANF     | 13 | 0.38333975 | 9.80087E-24 | 1.78836E-19 | 0.633 | 0.331 |
| TRAPPC1  | 13 | 0.38194982 | 1.75833E-20 | 3.20843E-16 | 0.709 | 0.452 |
| SRSF7    | 13 | 0.38091905 | 6.20012E-19 | 1.13134E-14 | 0.653 | 0.399 |
| SURF4    | 13 | 0.38075916 | 1.64991E-35 | 3.01059E-31 | 0.628 | 0.26  |
| PSMA4    | 13 | 0.38074791 | 2.91143E-13 | 5.31248E-09 | 0.613 | 0.405 |
| CCDC85B  | 13 | 0.38039853 | 5.93151E-18 | 1.08232E-13 | 0.955 | 0.795 |
| CENPE    | 13 | 0.38035117 | 0           | 0           | 0.342 | 0.003 |
| SNRPF    | 13 | 0.38004021 | 2.84684E-22 | 5.19462E-18 | 0.854 | 0.59  |
| C1orf122 | 13 | 0.37850342 | 1.80016E-16 | 3.28475E-12 | 0.633 | 0.402 |
| ACADVL   | 13 | 0.37823335 | 2.00656E-26 | 3.66137E-22 | 0.593 | 0.288 |
| PYURF    | 13 | 0.37665211 | 1.96442E-18 | 3.58447E-14 | 0.834 | 0.625 |
| H2AFY    | 13 | 0.3766496  | 1.32786E-30 | 2.42294E-26 | 0.633 | 0.288 |
| ATAD2    | 13 | 0.37641419 | 3.2399E-141 | 5.9119E-137 | 0.312 | 0.023 |
| COMMD4   | 13 | 0.3756922  | 1.63306E-43 | 2.97985E-39 | 0.503 | 0.157 |
| HELLS    | 13 | 0.37425296 | 3.5585E-177 | 6.4933E-173 | 0.342 | 0.021 |
| CRLF1    | 13 | 0.37377822 | 6.95076E-21 | 1.2683E-16  | 0.548 | 0.272 |
| PPP1CA   | 13 | 0.3723007  | 9.72846E-26 | 1.77515E-21 | 0.618 | 0.309 |
| TRIM59   | 13 | 0.37209639 | 2.3988E-134 | 4.3771E-130 | 0.337 | 0.028 |
| ID1      | 13 | 0.37199313 | 2.35359E-11 | 4.2946E-07  | 0.774 | 0.602 |
| CBFB     | 13 | 0.37191413 | 3.0291E-39  | 5.5272E-35  | 0.543 | 0.191 |
| TUBG1    | 13 | 0.37145242 | 4.98759E-85 | 9.10086E-81 | 0.422 | 0.067 |
| PRRX1    | 13 | 0.3713366  | 1.18135E-31 | 2.15562E-27 | 0.533 | 0.207 |
| CYGB     | 13 | 0.37087    | 1.65008E-18 | 3.01091E-14 | 0.337 | 0.131 |
| SNF8     | 13 | 0.37050177 | 1.7021E-21  | 3.10582E-17 | 0.668 | 0.385 |
| HSPB11   | 13 | 0.37036399 | 4.50947E-28 | 8.22842E-24 | 0.548 | 0.238 |
| BIRC2    | 13 | 0.37035289 | 6.92886E-14 | 1.26431E-09 | 0.653 | 0.424 |
| ANAPC15  | 13 | 0.37011645 | 4.4672E-46  | 8.15131E-42 | 0.467 | 0.131 |
| OSTC     | 13 | 0.36941269 | 1.3808E-19  | 2.51955E-15 | 0.925 | 0.808 |
| OAZ2     | 13 | 0.36932143 | 2.9406E-25  | 5.36572E-21 | 0.653 | 0.34  |
| FBN1     | 13 | 0.36872878 | 6.42081E-42 | 1.17161E-37 | 0.477 | 0.142 |
| MZT2A    | 13 | 0.36864915 | 8.55501E-26 | 1.56103E-21 | 0.94  | 0.783 |
| IL11     | 13 | 0.36846256 | 2.26086E-18 | 4.1254E-14  | 0.261 | 0.085 |
| MIS18BP1 | 13 | 0.36813679 | 5.00701E-98 | 9.13629E-94 | 0.442 | 0.064 |
| CDK2AP2  | 13 | 0.36602715 | 1.11871E-26 | 2.0413E-22  | 0.618 | 0.286 |
| NOP10    | 13 | 0.36595534 | 1.59817E-18 | 2.91619E-14 | 0.915 | 0.761 |
| TMED2    | 13 | 0.36573751 | 5.88104E-18 | 1.07311E-13 | 0.92  | 0.825 |
| PLEC     | 13 | 0.36536627 | 4.31071E-53 | 7.86575E-49 | 0.472 | 0.118 |
| CDC45    | 13 | 0.36508607 | 0           | 0           | 0.352 | 0.004 |
| KNSTRN   | 13 | 0.36498828 | 5.3741E-255 | 9.8061E-251 | 0.352 | 0.015 |

|          |    |            |             |             |       |       |
|----------|----|------------|-------------|-------------|-------|-------|
| GPAA1    | 13 | 0.36493664 | 3.95293E-25 | 7.21291E-21 | 0.683 | 0.359 |
| PPIC     | 13 | 0.36443273 | 4.15236E-17 | 7.57681E-13 | 0.739 | 0.472 |
| TIMM8B   | 13 | 0.36439254 | 4.60814E-19 | 8.40847E-15 | 0.714 | 0.477 |
| COTL1    | 13 | 0.36370703 | 6.33902E-48 | 1.15668E-43 | 0.392 | 0.092 |
| TAF9     | 13 | 0.36370013 | 4.31012E-25 | 7.86468E-21 | 0.578 | 0.282 |
| GPX8     | 13 | 0.3636764  | 7.56914E-25 | 1.38114E-20 | 0.603 | 0.294 |
| SMIM14   | 13 | 0.36287382 | 9.84118E-22 | 1.79572E-17 | 0.653 | 0.351 |
| GANAB    | 13 | 0.36257231 | 1.2235E-22  | 2.23252E-18 | 0.568 | 0.284 |
| PSIP1    | 13 | 0.3625262  | 2.59622E-29 | 4.73732E-25 | 0.538 | 0.221 |
| COX7A2   | 13 | 0.36243735 | 9.42913E-29 | 1.72053E-24 | 1     | 0.979 |
| HIGD2A   | 13 | 0.36237804 | 9.51987E-23 | 1.73709E-18 | 0.653 | 0.356 |
| FAP      | 13 | 0.36215559 | 6.49554E-21 | 1.18524E-16 | 0.513 | 0.237 |
| CMTM6    | 13 | 0.36212869 | 7.61964E-40 | 1.39036E-35 | 0.523 | 0.174 |
| ATP5E    | 13 | 0.36171559 | 4.1322E-22  | 7.54003E-18 | 1     | 0.996 |
| TAX1BP3  | 13 | 0.36105021 | 2.00893E-21 | 3.66569E-17 | 0.503 | 0.238 |
| CDC42BPA | 13 | 0.36102889 | 8.25895E-39 | 1.50701E-34 | 0.487 | 0.158 |
| FAM127A  | 13 | 0.36047795 | 1.32213E-36 | 2.4125E-32  | 0.643 | 0.262 |
| MTCH2    | 13 | 0.36010482 | 3.91715E-28 | 7.14762E-24 | 0.658 | 0.326 |
| MRPL51   | 13 | 0.35954193 | 6.38158E-27 | 1.16445E-22 | 0.955 | 0.814 |
| C8orf88  | 13 | 0.35952466 | 9.28985E-84 | 1.69512E-79 | 0.437 | 0.072 |
| TGOLN2   | 13 | 0.3592458  | 4.3327E-21  | 7.90587E-17 | 0.658 | 0.373 |
| LMAN1    | 13 | 0.35900055 | 2.71314E-24 | 4.95067E-20 | 0.663 | 0.343 |
| PRDX1    | 13 | 0.35889683 | 2.73028E-07 | 0.004981938 | 0.91  | 0.83  |
| CLSPN    | 13 | 0.35808435 | 0           | 0           | 0.307 | 0.007 |
| MCUR1    | 13 | 0.35734276 | 2.92287E-40 | 5.33336E-36 | 0.508 | 0.166 |
| ITGA5    | 13 | 0.3565193  | 8.55484E-32 | 1.561E-27   | 0.462 | 0.161 |
| ECT2     | 13 | 0.35606054 | 0           | 0           | 0.362 | 0.007 |
| CTSZ     | 13 | 0.35584124 | 1.33832E-34 | 2.44204E-30 | 0.548 | 0.207 |
| HNRNPUL1 | 13 | 0.35579125 | 1.26493E-26 | 2.30812E-22 | 0.593 | 0.279 |
| GSPT1    | 13 | 0.35549522 | 2.49116E-26 | 4.54562E-22 | 0.563 | 0.262 |
| YIF1B    | 13 | 0.35478356 | 5.63186E-38 | 1.02765E-33 | 0.548 | 0.197 |
| PRKDC    | 13 | 0.35440899 | 3.34504E-44 | 6.10369E-40 | 0.477 | 0.14  |
| TGFB1    | 13 | 0.3531186  | 1.63141E-47 | 2.97684E-43 | 0.492 | 0.138 |
| NUTF2    | 13 | 0.35311509 | 6.22966E-30 | 1.13673E-25 | 0.623 | 0.28  |
| SGOL1    | 13 | 0.35308724 | 0           | 0           | 0.352 | 0.003 |
| USP1     | 13 | 0.35283922 | 1.10768E-32 | 2.02118E-28 | 0.487 | 0.178 |
| NDUFAF3  | 13 | 0.35255962 | 8.53803E-19 | 1.55793E-14 | 0.854 | 0.651 |
| PSRC1    | 13 | 0.35254959 | 2.1187E-173 | 3.8659E-169 | 0.382 | 0.027 |
| SQLE     | 13 | 0.35248673 | 1.74492E-25 | 3.18396E-21 | 0.497 | 0.208 |

|              |    |            |             |             |       |       |
|--------------|----|------------|-------------|-------------|-------|-------|
| C1QL1        | 13 | 0.35191293 | 4.39119E-55 | 8.0126E-51  | 0.322 | 0.057 |
| MRPL18       | 13 | 0.35118553 | 3.79617E-23 | 6.92688E-19 | 0.608 | 0.324 |
| SPC24        | 13 | 0.35117337 | 0           | 0           | 0.327 | 0.004 |
| MKKS         | 13 | 0.35099949 | 7.77945E-25 | 1.41952E-20 | 0.613 | 0.315 |
| SRSF9        | 13 | 0.35081217 | 5.48119E-15 | 1.00015E-10 | 0.724 | 0.543 |
| NME4         | 13 | 0.3505448  | 5.82501E-18 | 1.06289E-13 | 0.714 | 0.447 |
| ATL3         | 13 | 0.35023834 | 8.64772E-35 | 1.57795E-30 | 0.538 | 0.199 |
| CNIH4        | 13 | 0.34961193 | 3.61437E-21 | 6.59514E-17 | 0.769 | 0.485 |
| TLN1         | 13 | 0.34885369 | 1.51646E-26 | 2.76709E-22 | 0.497 | 0.209 |
| ILF2         | 13 | 0.34883805 | 4.39193E-22 | 8.01395E-18 | 0.578 | 0.296 |
| BCL2L12      | 13 | 0.34834016 | 1.17242E-70 | 2.13931E-66 | 0.467 | 0.093 |
| NHP2         | 13 | 0.34804755 | 6.17442E-16 | 1.12665E-11 | 0.698 | 0.488 |
| FOXP1        | 13 | 0.3480353  | 7.89651E-20 | 1.44088E-15 | 0.533 | 0.267 |
| ANKRD11      | 13 | 0.34760992 | 9.74253E-41 | 1.77772E-36 | 0.487 | 0.151 |
| RP11-844P9.2 | 13 | 0.34714221 | 1.9023E-252 | 3.4711E-248 | 0.312 | 0.011 |
| CDK16        | 13 | 0.3463359  | 1.33094E-44 | 2.42856E-40 | 0.503 | 0.149 |
| RRM1         | 13 | 0.34618186 | 1.56663E-38 | 2.85864E-34 | 0.407 | 0.116 |
| NDUFB2       | 13 | 0.34591422 | 8.96992E-16 | 1.63674E-11 | 0.874 | 0.77  |
| GNAS         | 13 | 0.34486287 | 5.05086E-19 | 9.2163E-15  | 0.869 | 0.622 |
| SERTAD4-AS1  | 13 | 0.34443698 | 5.27667E-25 | 9.62834E-21 | 0.492 | 0.207 |
| DLGAP5       | 13 | 0.3438686  | 0           | 0           | 0.317 | 0.001 |
| SHFM1        | 13 | 0.34366312 | 2.18994E-17 | 3.99599E-13 | 0.935 | 0.859 |
| RTN3         | 13 | 0.34331418 | 9.43945E-29 | 1.72242E-24 | 0.588 | 0.261 |
| UCP2         | 13 | 0.34321241 | 7.7511E-155 | 1.4143E-150 | 0.362 | 0.028 |
| TMEM165      | 13 | 0.34293864 | 7.63059E-25 | 1.39235E-20 | 0.678 | 0.354 |
| TMBIM6       | 13 | 0.34277791 | 3.13277E-11 | 5.71636E-07 | 0.859 | 0.697 |
| UBE2A        | 13 | 0.34272702 | 4.1606E-24  | 7.59185E-20 | 0.663 | 0.355 |
| SPDL1        | 13 | 0.34266923 | 6.7513E-188 | 1.2319E-183 | 0.367 | 0.023 |
| SEC61B       | 13 | 0.34211308 | 6.79015E-14 | 1.239E-09   | 0.889 | 0.815 |
| PSMG3        | 13 | 0.34137367 | 5.76609E-30 | 1.05214E-25 | 0.568 | 0.238 |
| GNB2         | 13 | 0.34099903 | 9.05926E-19 | 1.65304E-14 | 0.739 | 0.492 |
| EIF4EBP1     | 13 | 0.33951052 | 2.58376E-15 | 4.71459E-11 | 0.754 | 0.537 |
| PXDN         | 13 | 0.33926289 | 1.52272E-36 | 2.77851E-32 | 0.387 | 0.11  |
| FIBP         | 13 | 0.33924674 | 1.10516E-20 | 2.01659E-16 | 0.698 | 0.414 |
| DEF8         | 13 | 0.33922723 | 5.92893E-49 | 1.08185E-44 | 0.457 | 0.119 |
| SNX7         | 13 | 0.33917761 | 7.79554E-35 | 1.42245E-30 | 0.603 | 0.237 |
| GCLM         | 13 | 0.3387074  | 3.89287E-49 | 7.10332E-45 | 0.437 | 0.108 |
| CD47         | 13 | 0.33809858 | 2.58585E-12 | 4.7184E-08  | 0.673 | 0.457 |
| SUMO1        | 13 | 0.33750387 | 3.76929E-21 | 6.87782E-17 | 0.905 | 0.686 |

|          |    |            |             |             |       |       |
|----------|----|------------|-------------|-------------|-------|-------|
| SLC25A39 | 13 | 0.33723767 | 1.72867E-24 | 3.1543E-20  | 0.543 | 0.252 |
| DSTN     | 13 | 0.33713727 | 6.69146E-18 | 1.22099E-13 | 1     | 0.997 |
| KDELC2   | 13 | 0.3370335  | 1.33778E-43 | 2.44106E-39 | 0.477 | 0.139 |
| MRPS16   | 13 | 0.3369824  | 1.53335E-22 | 2.7979E-18  | 0.663 | 0.376 |
| CXXC5    | 13 | 0.3368614  | 2.90943E-19 | 5.30884E-15 | 0.648 | 0.349 |
| IER3IP1  | 13 | 0.33654565 | 4.07986E-19 | 7.44452E-15 | 0.854 | 0.629 |
| MT2A     | 13 | 0.33646732 | 9.63299E-21 | 1.75773E-16 | 1     | 0.996 |
| CCDC18   | 13 | 0.33606525 | 4.4261E-207 | 8.0763E-203 | 0.357 | 0.02  |
| GALNT1   | 13 | 0.33597558 | 6.88426E-20 | 1.25617E-15 | 0.508 | 0.262 |
| TMA7     | 13 | 0.33564793 | 1.1958E-17  | 2.18198E-13 | 0.985 | 0.989 |
| COX6C    | 13 | 0.33495924 | 5.90577E-17 | 1.07763E-12 | 0.925 | 0.839 |
| RBBP7    | 13 | 0.33476572 | 4.18156E-28 | 7.63009E-24 | 0.538 | 0.224 |
| PARPBP   | 13 | 0.33476093 | 0           | 0           | 0.367 | 0.01  |
| KIF14    | 13 | 0.33436739 | 0           | 0           | 0.322 | 0.003 |
| SHCBP1   | 13 | 0.33407299 | 0           | 0           | 0.317 | 0.004 |
| SDF2L1   | 13 | 0.33313091 | 7.51043E-21 | 1.37043E-16 | 0.533 | 0.257 |
| MLLT11   | 13 | 0.33242095 | 2.02094E-40 | 3.68761E-36 | 0.402 | 0.108 |
| PCSK1    | 13 | 0.33221748 | 3.04338E-93 | 5.55326E-89 | 0.327 | 0.037 |
| SERPINH1 | 13 | 0.33145404 | 4.73732E-24 | 8.6442E-20  | 0.407 | 0.155 |
| CALD1    | 13 | 0.33053464 | 8.09882E-17 | 1.47779E-12 | 0.794 | 0.56  |
| CDCA8    | 13 | 0.33026158 | 0           | 0           | 0.291 | 0.004 |
| PLIN3    | 13 | 0.32984054 | 1.78655E-23 | 3.25992E-19 | 0.518 | 0.235 |
| POMP     | 13 | 0.32977039 | 2.66349E-17 | 4.86007E-13 | 0.94  | 0.846 |
| RALY     | 13 | 0.32976355 | 2.52286E-24 | 4.60346E-20 | 0.583 | 0.28  |
| ITGB3BP  | 13 | 0.32959246 | 3.39993E-21 | 6.20385E-17 | 0.623 | 0.333 |
| VKORC1   | 13 | 0.32933544 | 2.68558E-16 | 4.90039E-12 | 1     | 0.949 |
| RAD51AP1 | 13 | 0.32922788 | 0           | 0           | 0.312 | 0.008 |
| VBP1     | 13 | 0.32879202 | 2.3474E-27  | 4.2833E-23  | 0.578 | 0.26  |
| SON      | 13 | 0.32790165 | 9.65669E-17 | 1.76206E-12 | 0.789 | 0.54  |
| DCTN3    | 13 | 0.32772772 | 1.19722E-17 | 2.18457E-13 | 0.759 | 0.512 |
| CENPU    | 13 | 0.32607671 | 0           | 0           | 0.327 | 0.008 |
| DBF4     | 13 | 0.32332034 | 2.96755E-73 | 5.41489E-69 | 0.322 | 0.045 |
| CKAP2L   | 13 | 0.32184242 | 0           | 0           | 0.307 | 0.002 |
| CDK2AP1  | 13 | 0.32143997 | 1.79748E-29 | 3.27986E-25 | 0.477 | 0.179 |
| SLC35B2  | 13 | 0.32139365 | 3.39017E-33 | 6.18605E-29 | 0.568 | 0.218 |
| EFEMP2   | 13 | 0.32120603 | 9.67139E-16 | 1.76474E-11 | 0.658 | 0.422 |
| DR1      | 13 | 0.32109618 | 9.77207E-30 | 1.78311E-25 | 0.513 | 0.2   |
| HACD3    | 13 | 0.32107902 | 7.30318E-18 | 1.33261E-13 | 0.442 | 0.208 |
| LRRFIP1  | 13 | 0.32094176 | 4.13096E-18 | 7.53775E-14 | 0.633 | 0.363 |

|           |    |            |             |             |       |       |
|-----------|----|------------|-------------|-------------|-------|-------|
| SUB1      | 13 | 0.32085214 | 1.96433E-17 | 3.58431E-13 | 0.935 | 0.837 |
| JAG1      | 13 | 0.32054874 | 8.48208E-43 | 1.54773E-38 | 0.382 | 0.094 |
| DDAH2     | 13 | 0.32003325 | 4.16213E-16 | 7.59463E-12 | 0.533 | 0.301 |
| SRSF10    | 13 | 0.31986702 | 2.09371E-20 | 3.8204E-16  | 0.643 | 0.36  |
| COPZ2     | 13 | 0.31979037 | 1.076E-20   | 1.96338E-16 | 0.568 | 0.283 |
| TMEM167A  | 13 | 0.31960355 | 1.12595E-17 | 2.05451E-13 | 0.869 | 0.704 |
| BARD1     | 13 | 0.31882963 | 3.948E-103  | 7.2039E-99  | 0.337 | 0.036 |
| COL6A2    | 13 | 0.31847855 | 3.63926E-11 | 6.64055E-07 | 0.794 | 0.616 |
| MRPS11    | 13 | 0.3183305  | 2.76045E-32 | 5.037E-28   | 0.508 | 0.187 |
| TMEM50A   | 13 | 0.31806609 | 2.69096E-15 | 4.91019E-11 | 0.759 | 0.507 |
| KDELR3    | 13 | 0.31707174 | 1.38688E-18 | 2.53064E-14 | 0.543 | 0.279 |
| EIF1AX    | 13 | 0.31686129 | 5.29316E-16 | 9.65843E-12 | 0.809 | 0.609 |
| SDC1      | 13 | 0.31678276 | 2.8341E-172 | 5.1713E-168 | 0.327 | 0.02  |
| GMNN      | 13 | 0.31641415 | 8.72745E-53 | 1.5925E-48  | 0.387 | 0.083 |
| PRR34-AS1 | 13 | 0.31629545 | 9.22186E-26 | 1.68271E-21 | 0.492 | 0.2   |
| HINT2     | 13 | 0.3162397  | 7.63265E-21 | 1.39273E-16 | 0.608 | 0.322 |
| EIF4E     | 13 | 0.31582474 | 3.35769E-20 | 6.12677E-16 | 0.613 | 0.337 |
| MCFD2     | 13 | 0.3156741  | 9.50219E-17 | 1.73387E-12 | 0.543 | 0.303 |
| POLD2     | 13 | 0.31565957 | 1.00738E-18 | 1.83817E-14 | 0.633 | 0.366 |
| SCD       | 13 | 0.31525608 | 4.87015E-28 | 8.88656E-24 | 0.442 | 0.159 |
| NDUFS8    | 13 | 0.31452682 | 7.65618E-19 | 1.39702E-14 | 0.643 | 0.372 |
| FAM114A1  | 13 | 0.31404239 | 1.76965E-21 | 3.22907E-17 | 0.633 | 0.335 |
| BRI3      | 13 | 0.31313591 | 1.373E-13   | 2.50532E-09 | 0.93  | 0.834 |
| PDCD5     | 13 | 0.31301668 | 4.28637E-14 | 7.82133E-10 | 0.784 | 0.556 |
| METTL9    | 13 | 0.31265056 | 2.50994E-21 | 4.57988E-17 | 0.578 | 0.297 |
| RNH1      | 13 | 0.31246286 | 7.98483E-07 | 0.014569911 | 0.658 | 0.538 |
| PHLDA1    | 13 | 0.3124019  | 3.21129E-10 | 5.85964E-06 | 0.402 | 0.22  |
| CLMP      | 13 | 0.31210734 | 6.5982E-18  | 1.20397E-13 | 0.432 | 0.2   |
| NAV1      | 13 | 0.31201371 | 2.73117E-31 | 4.98357E-27 | 0.422 | 0.139 |
| TUBA1A    | 13 | 0.31179043 | 5.94893E-14 | 1.0855E-09  | 0.387 | 0.187 |
| RAB32     | 13 | 0.31143778 | 8.3069E-24  | 1.51576E-19 | 0.598 | 0.285 |
| REEP4     | 13 | 0.31118095 | 1.5626E-169 | 2.8512E-165 | 0.317 | 0.019 |
| DCK       | 13 | 0.31111096 | 2.76527E-23 | 5.04578E-19 | 0.432 | 0.174 |
| NDC80     | 13 | 0.31094714 | 0           | 0           | 0.312 | 0.001 |
| VDAC3     | 13 | 0.31065005 | 1.76533E-25 | 3.2212E-21  | 0.558 | 0.248 |
| PRDX3     | 13 | 0.31041899 | 2.65064E-19 | 4.83662E-15 | 0.653 | 0.369 |
| ALKBH5    | 13 | 0.31026667 | 1.77785E-13 | 3.24405E-09 | 0.613 | 0.384 |
| RPSA      | 13 | 0.31025801 | 1.54392E-16 | 2.81718E-12 | 1     | 0.999 |
| SOX4      | 13 | 0.30979776 | 9.41488E-34 | 1.71793E-29 | 0.332 | 0.086 |



|           |    |            |             |             |       |       |
|-----------|----|------------|-------------|-------------|-------|-------|
| RFC3      | 13 | 0.30977768 | 7.7561E-117 | 1.4152E-112 | 0.352 | 0.035 |
| UBE2Q2    | 13 | 0.30917426 | 6.17898E-20 | 1.12748E-15 | 0.598 | 0.312 |
| SLIRP     | 13 | 0.30821455 | 9.6815E-13  | 1.76658E-08 | 0.849 | 0.705 |
| OIP5      | 13 | 0.30807393 | 0           | 0           | 0.317 | 0.008 |
| PPP4C     | 13 | 0.30785413 | 3.69456E-18 | 6.74147E-14 | 0.568 | 0.309 |
| C6orf62   | 13 | 0.30739853 | 5.85366E-18 | 1.06812E-13 | 0.593 | 0.335 |
| CHSY1     | 13 | 0.30736042 | 1.85446E-29 | 3.38384E-25 | 0.457 | 0.165 |
| GTF2A2    | 13 | 0.30676133 | 1.86065E-14 | 3.39514E-10 | 0.673 | 0.44  |
| MRPL14    | 13 | 0.30658153 | 5.42804E-14 | 9.90454E-10 | 0.774 | 0.566 |
| GTF3C6    | 13 | 0.30641595 | 4.25069E-17 | 7.75623E-13 | 0.618 | 0.362 |
| NCAPG     | 13 | 0.30623183 | 0           | 0           | 0.317 | 0.003 |
| NCL       | 13 | 0.30551962 | 1.43746E-12 | 2.62294E-08 | 0.799 | 0.619 |
| YWHAG     | 13 | 0.30542932 | 2.94952E-22 | 5.38198E-18 | 0.518 | 0.235 |
| EZH2      | 13 | 0.30514717 | 5.9542E-265 | 1.0865E-260 | 0.307 | 0.01  |
| RNF26     | 13 | 0.30423056 | 4.77985E-53 | 8.72179E-49 | 0.377 | 0.079 |
| ARHGAP11B | 13 | 0.30411114 | 0           | 0           | 0.317 | 0.008 |
| TGFBR1    | 13 | 0.3040739  | 1.93121E-37 | 3.52388E-33 | 0.387 | 0.107 |
| FAAP20    | 13 | 0.3038621  | 1.74296E-15 | 3.18037E-11 | 0.739 | 0.51  |
| LTBP2     | 13 | 0.30375829 | 1.61389E-38 | 2.94487E-34 | 0.412 | 0.115 |
| SCX       | 13 | 0.30310352 | 4.70075E-17 | 8.57746E-13 | 0.206 | 0.063 |
| LMNB1     | 13 | 0.30292166 | 0           | 0           | 0.312 | 0.006 |
| RTF1      | 13 | 0.30253496 | 3.43919E-15 | 6.27549E-11 | 0.714 | 0.481 |
| EIF4E2    | 13 | 0.30245887 | 3.04983E-19 | 5.56502E-15 | 0.553 | 0.288 |
| SPATA33   | 13 | 0.30239608 | 2.94814E-44 | 5.37947E-40 | 0.382 | 0.093 |
| EVA1A     | 13 | 0.30189328 | 3.72014E-65 | 6.78814E-61 | 0.281 | 0.039 |
| ANPEP     | 13 | 0.30187923 | 1.92116E-80 | 3.50553E-76 | 0.236 | 0.023 |
| EZR       | 13 | 0.30176339 | 9.60343E-30 | 1.75234E-25 | 0.417 | 0.14  |
| LOXL2     | 13 | 0.30172913 | 6.40877E-43 | 1.16941E-38 | 0.407 | 0.104 |
| SLC2A4RG  | 13 | 0.30159544 | 3.68118E-33 | 6.71706E-29 | 0.417 | 0.132 |
| G2E3      | 13 | 0.30084427 | 4.49097E-57 | 8.19467E-53 | 0.377 | 0.074 |
| FLOT1     | 13 | 0.30077964 | 4.93406E-14 | 9.00318E-10 | 0.698 | 0.479 |
| TXNL4A    | 13 | 0.30000086 | 2.03435E-15 | 3.71209E-11 | 0.688 | 0.448 |
| GINS2     | 13 | 0.29974424 | 3.36759E-84 | 6.14484E-80 | 0.317 | 0.038 |
| TXNDC12   | 13 | 0.29909041 | 4.07627E-25 | 7.43797E-21 | 0.588 | 0.274 |
| PCMT1     | 13 | 0.29907995 | 5.76455E-12 | 1.05186E-07 | 0.643 | 0.436 |
| RAC1      | 13 | 0.29890413 | 2.627E-18   | 4.79348E-14 | 0.985 | 0.926 |
| MELK      | 13 | 0.29889807 | 0           | 0           | 0.291 | 0.002 |
| FBXO5     | 13 | 0.2979038  | 3.32045E-64 | 6.05882E-60 | 0.296 | 0.044 |
| CLIC4     | 13 | 0.29740471 | 1.5749E-15  | 2.87371E-11 | 0.729 | 0.472 |

|         |    |            |             |             |       |       |
|---------|----|------------|-------------|-------------|-------|-------|
| KIF11   | 13 | 0.2970576  | 0           | 0           | 0.302 | 0.004 |
| LSM2    | 13 | 0.2969359  | 5.58075E-12 | 1.01832E-07 | 0.704 | 0.53  |
| HMGXB4  | 13 | 0.29648134 | 9.86393E-30 | 1.79987E-25 | 0.437 | 0.153 |
| MLEC    | 13 | 0.29640477 | 1.03322E-17 | 1.88532E-13 | 0.673 | 0.4   |
| KIF20A  | 13 | 0.29591081 | 0           | 0           | 0.296 | 0.002 |
| NCAM1   | 13 | 0.29583869 | 2.9117E-147 | 5.3129E-143 | 0.302 | 0.02  |
| IQGAP1  | 13 | 0.29579286 | 8.71123E-16 | 1.58954E-11 | 0.663 | 0.394 |
| EIF5    | 13 | 0.29573884 | 1.18163E-15 | 2.15612E-11 | 0.864 | 0.648 |
| PIGX    | 13 | 0.294713   | 1.3416E-22  | 2.44801E-18 | 0.407 | 0.161 |
| HOMER3  | 13 | 0.29433035 | 4.7964E-31  | 8.752E-27   | 0.412 | 0.135 |
| TIMM10  | 13 | 0.29426836 | 1.70412E-21 | 3.10951E-17 | 0.593 | 0.303 |
| SEPT4   | 13 | 0.29376466 | 3.28719E-15 | 5.99813E-11 | 0.673 | 0.437 |
| ACTL6A  | 13 | 0.29292192 | 2.0414E-17  | 3.72494E-13 | 0.462 | 0.222 |
| AES     | 13 | 0.29289729 | 6.22771E-20 | 1.13637E-15 | 0.563 | 0.281 |
| UQCR10  | 13 | 0.29257898 | 4.04457E-14 | 7.38012E-10 | 0.899 | 0.804 |
| NOP56   | 13 | 0.29246545 | 1.53591E-22 | 2.80257E-18 | 0.452 | 0.19  |
| E2F1    | 13 | 0.29228817 | 3.7977E-263 | 6.9296E-259 | 0.271 | 0.008 |
| SCOC    | 13 | 0.29114814 | 3.44782E-17 | 6.29123E-13 | 0.799 | 0.538 |
| AK6     | 13 | 0.29090273 | 6.24101E-17 | 1.1388E-12  | 0.543 | 0.294 |
| NEK2    | 13 | 0.28893645 | 0           | 0           | 0.271 | 0.001 |
| GCSH    | 13 | 0.28878848 | 8.79649E-21 | 1.6051E-16  | 0.523 | 0.252 |
| CCDC74A | 13 | 0.28877071 | 1.72209E-41 | 3.1423E-37  | 0.432 | 0.119 |
| LIMK2   | 13 | 0.28868649 | 4.20121E-83 | 7.66595E-79 | 0.337 | 0.044 |
| ALYREF  | 13 | 0.28847326 | 9.60375E-78 | 1.7524E-73  | 0.347 | 0.049 |
| IDI1    | 13 | 0.28845587 | 1.42798E-16 | 2.60563E-12 | 0.563 | 0.294 |
| IMPAD1  | 13 | 0.28817406 | 3.93837E-29 | 7.18634E-25 | 0.477 | 0.176 |
| ROMO1   | 13 | 0.28809863 | 1.09992E-11 | 2.00702E-07 | 0.884 | 0.826 |
| SYNCRIP | 13 | 0.28741168 | 3.31314E-30 | 6.04549E-26 | 0.573 | 0.229 |
| TUSC3   | 13 | 0.28731718 | 3.53224E-23 | 6.44529E-19 | 0.528 | 0.232 |
| RAD23A  | 13 | 0.28725286 | 2.05976E-15 | 3.75845E-11 | 0.874 | 0.635 |
| ZWILCH  | 13 | 0.28667772 | 5.7536E-165 | 1.0499E-160 | 0.332 | 0.021 |
| WSB2    | 13 | 0.28654936 | 2.26772E-38 | 4.13792E-34 | 0.422 | 0.12  |
| FAM122B | 13 | 0.28592843 | 3.92774E-57 | 7.16695E-53 | 0.382 | 0.075 |
| HNRNPM  | 13 | 0.28549068 | 3.91742E-18 | 7.14812E-14 | 0.628 | 0.343 |
| ASF1B   | 13 | 0.2850338  | 0           | 0           | 0.266 | 0.005 |
| MCM7    | 13 | 0.28496031 | 1.51686E-29 | 2.76781E-25 | 0.281 | 0.073 |
| DAZAP1  | 13 | 0.28487514 | 1.7049E-37  | 3.11093E-33 | 0.437 | 0.131 |
| C2orf69 | 13 | 0.28478885 | 2.32169E-35 | 4.23638E-31 | 0.412 | 0.123 |
| TP53I13 | 13 | 0.2840536  | 4.24594E-20 | 7.74757E-16 | 0.598 | 0.312 |

|               |    |            |             |             |       |       |
|---------------|----|------------|-------------|-------------|-------|-------|
| SYPL1         | 13 | 0.2837631  | 4.59445E-11 | 8.38349E-07 | 0.819 | 0.627 |
| METRNL        | 13 | 0.28313265 | 5.6926E-23  | 1.03873E-18 | 0.477 | 0.196 |
| UBE2D2        | 13 | 0.28285097 | 3.73644E-14 | 6.81789E-10 | 0.814 | 0.597 |
| RP11-783K16.5 | 13 | 0.28282207 | 2.1044E-107 | 3.8399E-103 | 0.312 | 0.029 |
| MYADM         | 13 | 0.28260288 | 1.8014E-22  | 3.28702E-18 | 0.457 | 0.193 |
| MGST3         | 13 | 0.28260189 | 3.3697E-12  | 6.1487E-08  | 0.839 | 0.658 |
| PSMD14        | 13 | 0.28247362 | 1.85948E-27 | 3.39299E-23 | 0.472 | 0.18  |
| HNRNPA0       | 13 | 0.28229742 | 6.83158E-12 | 1.24656E-07 | 0.879 | 0.681 |
| APITD1        | 13 | 0.2820987  | 1.32071E-42 | 2.40991E-38 | 0.372 | 0.09  |
| TRIOBP        | 13 | 0.28147123 | 8.05213E-45 | 1.46927E-40 | 0.442 | 0.116 |
| PMM1          | 13 | 0.27984888 | 4.46571E-14 | 8.14857E-10 | 0.548 | 0.316 |
| RECQL         | 13 | 0.27970195 | 7.20812E-43 | 1.31526E-38 | 0.432 | 0.115 |
| TRA2B         | 13 | 0.27969001 | 2.89956E-14 | 5.29083E-10 | 0.633 | 0.385 |
| PCOLCE        | 13 | 0.2796762  | 2.91404E-12 | 5.31725E-08 | 0.482 | 0.265 |
| SNRNP25       | 13 | 0.27942488 | 3.01023E-17 | 5.49276E-13 | 0.497 | 0.257 |
| PPP2CA        | 13 | 0.27940763 | 2.54893E-14 | 4.65104E-10 | 0.608 | 0.364 |
| PPM1G         | 13 | 0.27938778 | 3.51523E-21 | 6.41424E-17 | 0.477 | 0.217 |
| POP7          | 13 | 0.27916034 | 3.02755E-18 | 5.52438E-14 | 0.653 | 0.365 |
| C4orf46       | 13 | 0.27893802 | 1.7606E-99  | 3.21258E-95 | 0.317 | 0.033 |
| OST4          | 13 | 0.27877779 | 9.69411E-14 | 1.76888E-09 | 1     | 0.999 |
| HK1           | 13 | 0.27865019 | 1.02676E-34 | 1.87353E-30 | 0.427 | 0.131 |
| SNRPE         | 13 | 0.27863462 | 9.2557E-13  | 1.68889E-08 | 0.849 | 0.668 |
| MYO1C         | 13 | 0.27863228 | 2.9092E-23  | 5.30842E-19 | 0.447 | 0.181 |
| CAP1          | 13 | 0.2779876  | 6.57598E-16 | 1.19992E-11 | 0.503 | 0.263 |
| RER1          | 13 | 0.27754007 | 1.19995E-12 | 2.18955E-08 | 0.779 | 0.576 |
| FAT1          | 13 | 0.27746349 | 3.57732E-53 | 6.52754E-49 | 0.332 | 0.062 |
| FOSL2         | 13 | 0.27700349 | 1.16048E-13 | 2.11753E-09 | 0.482 | 0.265 |
| FAM83D        | 13 | 0.27648811 | 0           | 0           | 0.256 | 0.002 |
| TXNDC9        | 13 | 0.27621925 | 1.19284E-21 | 2.17658E-17 | 0.422 | 0.172 |
| CYB5R3        | 13 | 0.27605982 | 1.83965E-12 | 3.35681E-08 | 0.844 | 0.655 |
| ARPP19        | 13 | 0.27568766 | 2.84489E-12 | 5.19107E-08 | 0.759 | 0.549 |
| RB1           | 13 | 0.27539692 | 3.12685E-37 | 5.70556E-33 | 0.377 | 0.102 |
| PSENEN        | 13 | 0.27495403 | 9.66024E-18 | 1.7627E-13  | 0.538 | 0.279 |
| TMCO3         | 13 | 0.27480432 | 2.16696E-13 | 3.95406E-09 | 0.608 | 0.373 |
| LSM1          | 13 | 0.27459323 | 3.30295E-21 | 6.0269E-17  | 0.583 | 0.288 |
| SRRM2         | 13 | 0.27456111 | 3.74434E-15 | 6.8323E-11  | 0.688 | 0.427 |
| TMEM19        | 13 | 0.27455203 | 7.64723E-52 | 1.39539E-47 | 0.307 | 0.055 |
| KLF10         | 13 | 0.27429514 | 1.94325E-19 | 3.54585E-15 | 0.442 | 0.192 |
| MND1          | 13 | 0.27413257 | 0           | 0           | 0.271 | 0.005 |

|          |    |            |             |             |       |       |
|----------|----|------------|-------------|-------------|-------|-------|
| ARF5     | 13 | 0.27340713 | 5.68869E-16 | 1.03802E-11 | 0.709 | 0.437 |
| EMC6     | 13 | 0.2733033  | 1.08508E-12 | 1.97994E-08 | 0.583 | 0.369 |
| SHC1     | 13 | 0.27328185 | 5.41028E-26 | 9.87215E-22 | 0.437 | 0.162 |
| USMG5    | 13 | 0.27303093 | 2.1319E-13  | 3.89008E-09 | 0.975 | 0.929 |
| FAM96A   | 13 | 0.27234679 | 3.22414E-16 | 5.8831E-12  | 0.543 | 0.297 |
| G3BP1    | 13 | 0.27196211 | 5.94863E-21 | 1.08545E-16 | 0.573 | 0.284 |
| PTPN14   | 13 | 0.27188545 | 2.15231E-27 | 3.92733E-23 | 0.432 | 0.155 |
| PLK1     | 13 | 0.27172097 | 0           | 0           | 0.261 | 0.003 |
| PTS      | 13 | 0.27149041 | 1.24364E-15 | 2.26928E-11 | 0.543 | 0.308 |
| ATP5B    | 13 | 0.27133929 | 7.26294E-10 | 1.32527E-05 | 0.628 | 0.426 |
| DESI2    | 13 | 0.2712917  | 2.70003E-31 | 4.92674E-27 | 0.402 | 0.127 |
| TPM1     | 13 | 0.27127784 | 4.56561E-07 | 0.008330867 | 0.749 | 0.614 |
| ARHGDIB  | 13 | 0.27084706 | 1.32258E-26 | 2.41331E-22 | 0.291 | 0.082 |
| ENG      | 13 | 0.27073591 | 2.14221E-36 | 3.9089E-32  | 0.372 | 0.099 |
| POC1A    | 13 | 0.27053636 | 3.9399E-307 | 7.1892E-303 | 0.307 | 0.008 |
| NRM      | 13 | 0.26961649 | 9.9452E-65  | 1.8147E-60  | 0.322 | 0.05  |
| DLEU2    | 13 | 0.26957853 | 2.32288E-47 | 4.23857E-43 | 0.382 | 0.086 |
| CCM2     | 13 | 0.26923876 | 2.42953E-35 | 4.43316E-31 | 0.347 | 0.091 |
| NRAS     | 13 | 0.26882834 | 6.97104E-35 | 1.27201E-30 | 0.417 | 0.125 |
| FGD5-AS1 | 13 | 0.26839078 | 1.43584E-23 | 2.61998E-19 | 0.462 | 0.189 |
| HNRNPA1  | 13 | 0.2682049  | 2.26895E-11 | 4.14015E-07 | 0.995 | 0.989 |
| CCDC109B | 13 | 0.26780958 | 1.30098E-17 | 2.3739E-13  | 0.523 | 0.269 |
| CNPY3    | 13 | 0.26778846 | 3.28667E-14 | 5.99719E-10 | 0.543 | 0.308 |
| UBL5     | 13 | 0.26679808 | 8.99394E-14 | 1.64112E-09 | 0.98  | 0.949 |
| GGCT     | 13 | 0.26671218 | 6.09683E-15 | 1.11249E-10 | 0.442 | 0.227 |
| LMO7     | 13 | 0.2667053  | 2.38524E-46 | 4.35235E-42 | 0.332 | 0.069 |
| WBP5     | 13 | 0.26657066 | 1.12367E-09 | 2.05037E-05 | 0.874 | 0.745 |
| MMP14    | 13 | 0.26590684 | 2.97729E-25 | 5.43267E-21 | 0.477 | 0.185 |
| PLAU     | 13 | 0.26560158 | 2.65807E-78 | 4.85018E-74 | 0.181 | 0.014 |
| SFN      | 13 | 0.26515563 | 9.94454E-26 | 1.81458E-21 | 0.226 | 0.055 |
| CSE1L    | 13 | 0.26504656 | 1.55785E-41 | 2.84262E-37 | 0.407 | 0.106 |
| SAE1     | 13 | 0.26484677 | 4.17648E-36 | 7.62083E-32 | 0.417 | 0.122 |
| SGCB     | 13 | 0.26460926 | 7.96227E-12 | 1.45288E-07 | 0.638 | 0.417 |
| GOLM1    | 13 | 0.26447156 | 1.01275E-20 | 1.84797E-16 | 0.508 | 0.23  |
| SAR1A    | 13 | 0.26403019 | 3.41681E-12 | 6.23465E-08 | 0.734 | 0.519 |
| COQ2     | 13 | 0.2638018  | 2.16173E-78 | 3.94451E-74 | 0.317 | 0.041 |
| BUD31    | 13 | 0.26374864 | 1.23553E-13 | 2.25448E-09 | 0.683 | 0.454 |
| UQCRFS1  | 13 | 0.26372106 | 2.59062E-14 | 4.7271E-10  | 0.719 | 0.494 |
| DPYSL2   | 13 | 0.26364587 | 2.62622E-19 | 4.79206E-15 | 0.543 | 0.263 |

|          |    |            |             |             |       |       |
|----------|----|------------|-------------|-------------|-------|-------|
| EXOSC8   | 13 | 0.26343078 | 2.08474E-26 | 3.80403E-22 | 0.442 | 0.162 |
| PDZRN3   | 13 | 0.26283795 | 2.35986E-64 | 4.30603E-60 | 0.261 | 0.034 |
| ZEB1     | 13 | 0.26269574 | 6.49135E-19 | 1.18448E-14 | 0.407 | 0.174 |
| PRRX2    | 13 | 0.26256535 | 1.39183E-21 | 2.53967E-17 | 0.342 | 0.123 |
| C21orf58 | 13 | 0.26226793 | 9.1223E-181 | 1.6645E-176 | 0.271 | 0.013 |
| MIF      | 13 | 0.26215841 | 1.4056E-17  | 2.5648E-13  | 1     | 1     |
| XPO1     | 13 | 0.2620599  | 4.96004E-27 | 9.05059E-23 | 0.472 | 0.179 |
| MFSD14B  | 13 | 0.26201936 | 2.26373E-42 | 4.13063E-38 | 0.377 | 0.092 |
| DAP      | 13 | 0.26112023 | 1.74899E-12 | 3.19138E-08 | 0.709 | 0.482 |
| EPN1     | 13 | 0.26108799 | 4.15806E-16 | 7.58721E-12 | 0.447 | 0.222 |
| ACTR2    | 13 | 0.26097054 | 1.05224E-17 | 1.92003E-13 | 0.598 | 0.322 |
| CD70     | 13 | 0.26095625 | 1.37548E-53 | 2.50983E-49 | 0.216 | 0.028 |
| SPTSSA   | 13 | 0.26088635 | 7.01176E-13 | 1.27944E-08 | 0.628 | 0.408 |
| TMEM14C  | 13 | 0.26085682 | 3.41458E-11 | 6.23059E-07 | 0.814 | 0.609 |
| MBNL1    | 13 | 0.26079485 | 4.28587E-13 | 7.82042E-09 | 0.593 | 0.368 |
| ENSA     | 13 | 0.26068993 | 3.61365E-17 | 6.59382E-13 | 0.508 | 0.258 |
| HYLS1    | 13 | 0.26061053 | 7.8261E-101 | 1.42803E-96 | 0.281 | 0.026 |
| MGAT2    | 13 | 0.2604525  | 1.69418E-26 | 3.09137E-22 | 0.422 | 0.151 |
| GAS2L1   | 13 | 0.26006527 | 9.77195E-25 | 1.78309E-20 | 0.372 | 0.129 |
| APLP2    | 13 | 0.26001925 | 3.71038E-14 | 6.77032E-10 | 0.608 | 0.36  |
| ZFR      | 13 | 0.25987762 | 3.70704E-10 | 6.76423E-06 | 0.503 | 0.304 |
| RNPS1    | 13 | 0.25984739 | 2.58788E-16 | 4.7221E-12  | 0.618 | 0.352 |
| UBE2K    | 13 | 0.2596494  | 7.72226E-16 | 1.40908E-11 | 0.553 | 0.307 |
| SUZ12    | 13 | 0.25942403 | 2.45709E-34 | 4.48346E-30 | 0.402 | 0.118 |
| DDX5     | 13 | 0.25937457 | 1.50939E-11 | 2.75419E-07 | 0.799 | 0.585 |
| UHRF2    | 13 | 0.25936266 | 1.91145E-31 | 3.48782E-27 | 0.357 | 0.103 |
| PHF20    | 13 | 0.25934689 | 1.48549E-26 | 2.71057E-22 | 0.432 | 0.158 |
| FAM111A  | 13 | 0.25930999 | 1.68787E-44 | 3.07986E-40 | 0.266 | 0.048 |
| CRAT     | 13 | 0.25909785 | 1.3946E-38  | 2.54473E-34 | 0.347 | 0.085 |
| ICMT     | 13 | 0.25878389 | 6.02667E-58 | 1.09969E-53 | 0.317 | 0.053 |
| PABPN1   | 13 | 0.2581715  | 1.34584E-23 | 2.45576E-19 | 0.492 | 0.206 |
| UBE2M    | 13 | 0.25810274 | 1.54305E-21 | 2.81561E-17 | 0.427 | 0.175 |
| VMP1     | 13 | 0.25806377 | 4.86819E-09 | 8.88298E-05 | 0.714 | 0.539 |
| ORC6     | 13 | 0.25804667 | 5.5285E-163 | 1.0088E-158 | 0.281 | 0.015 |
| MYBL1    | 13 | 0.25796566 | 2.2625E-227 | 4.1283E-223 | 0.271 | 0.009 |
| UHRF1    | 13 | 0.25789249 | 7.8307E-190 | 1.4289E-185 | 0.231 | 0.008 |
| CAST     | 13 | 0.257609   | 7.82627E-14 | 1.42806E-09 | 0.623 | 0.393 |
| HN1L     | 13 | 0.25636085 | 3.71379E-35 | 6.77655E-31 | 0.372 | 0.102 |
| COX6A1   | 13 | 0.25616858 | 2.59212E-14 | 4.72984E-10 | 0.95  | 0.836 |

|           |    |            |             |             |       |       |
|-----------|----|------------|-------------|-------------|-------|-------|
| HNRNPD    | 13 | 0.25614323 | 7.79509E-14 | 1.42237E-09 | 0.658 | 0.414 |
| GNPNAT1   | 13 | 0.25609792 | 8.81767E-26 | 1.60896E-21 | 0.457 | 0.172 |
| KRTCAP2   | 13 | 0.25608257 | 1.89502E-10 | 3.45784E-06 | 0.879 | 0.777 |
| VCL       | 13 | 0.25563071 | 5.11571E-33 | 9.33464E-29 | 0.377 | 0.109 |
| NPM3      | 13 | 0.25529278 | 1.58491E-22 | 2.89199E-18 | 0.417 | 0.163 |
| DDX21     | 13 | 0.2551815  | 2.26621E-12 | 4.13515E-08 | 0.508 | 0.29  |
| PNKD      | 13 | 0.25485896 | 5.36037E-14 | 9.78106E-10 | 0.618 | 0.372 |
| MAPRE1    | 13 | 0.25482667 | 4.1346E-21  | 7.54441E-17 | 0.462 | 0.196 |
| DHCR24    | 13 | 0.25458814 | 3.04085E-42 | 5.54864E-38 | 0.312 | 0.066 |
| ZNHIT1    | 13 | 0.25420972 | 2.25164E-11 | 4.10857E-07 | 0.734 | 0.562 |
| PDGFC     | 13 | 0.2538918  | 1.76716E-42 | 3.22454E-38 | 0.357 | 0.083 |
| NIPA2     | 13 | 0.25380861 | 4.44651E-29 | 8.11354E-25 | 0.387 | 0.124 |
| CERCAM    | 13 | 0.25360354 | 1.6843E-34  | 3.07334E-30 | 0.372 | 0.103 |
| C7orf49   | 13 | 0.25322277 | 1.68804E-25 | 3.08016E-21 | 0.367 | 0.125 |
| DCAF7     | 13 | 0.25322026 | 2.96634E-31 | 5.41269E-27 | 0.367 | 0.108 |
| CCP110    | 13 | 0.25317589 | 7.01198E-31 | 1.27948E-26 | 0.312 | 0.083 |
| PKMYT1    | 13 | 0.25304174 | 0           | 0           | 0.221 | 0.003 |
| CASC5     | 13 | 0.2527471  | 0           | 0           | 0.256 | 0.003 |
| PKM       | 13 | 0.25259208 | 1.19359E-09 | 2.17793E-05 | 0.995 | 0.926 |
| SPTBN1    | 13 | 0.25209613 | 6.40551E-17 | 1.16881E-12 | 0.432 | 0.203 |
| WASF2     | 13 | 0.25188884 | 3.82811E-16 | 6.98515E-12 | 0.698 | 0.421 |
| PHTF1     | 13 | 0.25181565 | 5.51129E-51 | 1.00565E-46 | 0.307 | 0.055 |
| VCP       | 13 | 0.25140902 | 1.36726E-17 | 2.49483E-13 | 0.452 | 0.213 |
| POLR2E    | 13 | 0.25132671 | 2.03903E-15 | 3.72062E-11 | 0.533 | 0.294 |
| MBNL1-AS1 | 13 | 0.25121543 | 5.34621E-22 | 9.75523E-18 | 0.261 | 0.078 |
| GNB4      | 13 | 0.2510872  | 9.57621E-82 | 1.74737E-77 | 0.281 | 0.031 |
| MT-ND2    | 13 | 0.25043663 | 4.38722E-07 | 0.008005354 | 0.814 | 0.671 |
