# Supplementary material for: Single-Cell RNA-Seq Analysis of Cells from Degenerating and Non-Degenerating Intervertebral Discs from the Same Individual Reveals New Biomarkers for Intervertebral Disc Degeneration
Source: MDPI journal article supplement (doi:10.3390/ijms23073993), 2022-04-03
Supplement: s1 [file s1]

**Table S1.**10X samples preparation.

| Sample Name | cDNA PCR [300-6000bp] (ng/ul) | cDNA Yield (ng) | cDNA PCR used to Seq Ready (ng) | Seq Ready [300-6000] (ng/uL) | Seq Ready Yield (ng) | Index    | cDNA PCR | Index PCR | Cell /uL | Viability (%) | Target | Species |
|-------------|-------------------------------|-----------------|---------------------------------|------------------------------|----------------------|----------|----------|-----------|----------|---------------|--------|---------|
| NPH         | 2.48                          | 104             | 79                              | 20                           | 628                  | SI-GA-A9 | 12       | 12        | 500      | 92%           | >5000  | Human   |
| AFH         | 2.40                          | 101             | 77                              | 25                           | 790                  | SI-GA-B9 | 12       | 12        | 800      | 93%           | >5000  | Human   |
| NPD         | 1.96                          | 82              | 63                              | 16                           | 515                  | SI-GA-C9 | 12       | 12        | 335      | 82%           | >5000  | Human   |
| AFD         | 2.35                          | 99              | 75                              | 18                           | 586                  | SI-GA-D9 | 12       | 12        | 215      | 83%           | >5000  | Human   |
