# Supplementary material for: Single-Cell RNA-Seq Analysis of Cells from Degenerating and Non-Degenerating Intervertebral Discs from the Same Individual Reveals New Biomarkers for Intervertebral Disc Degeneration
Source: MDPI journal article supplement (doi:10.3390/ijms23073993), 2022-04-03
Supplement: s1 [file s1]

**Table S3.** Variation in cell proportions between iAFnD and iAFD.

| Clusters | iAFnD | iAFD  | % Variation |
|----------|-------|-------|-------------|
| 0        | 18.56 | 17.92 | -3.44827586 |
| 1        | 20.79 | 14.17 | -31.8422318 |
| 2        | 11.31 | 14.29 | 20.8537439  |
| 3        | 8.18  | 9.93  | 17.6233635  |
| 4        | 9.45  | 7.12  | -24.6560847 |
| 5        | 8.18  | 7.05  | -13.8141809 |
| 6        | 3.16  | 7.86  | 59.7964377  |
| 7        | 5.53  | 3.78  | -31.6455696 |
| 8        | 6.32  | 4.98  | -21.2025316 |
| 9        | 2.65  | 3.27  | 18.9602446  |
| 10       | 1.63  | 3.17  | 48.5804416  |
| 11       | 2.11  | 2.26  | 6.63716814  |
| 12       | 1.47  | 3.23  | 54.4891641  |
| 13       | 0.67  | 0.97  | 30.9278351  |

**Table S4.** Variation in cell proportions between NPnD NPD and NPD.

| Clusters | NPnD  | NPD   | % Variation |
|----------|-------|-------|-------------|
| 0        | 18.75 | 20.68 | 9.33268859  |
| 1        | 18.7  | 14.15 | -24.3315508 |
| 2        | 11.09 | 12.95 | 14.3629344  |
| 3        | 7.42  | 11.55 | 35.7575758  |
| 4        | 9.57  | 4.28  | -55.276907  |
| 5        | 7.34  | 5.62  | -23.4332425 |
| 6        | 4.32  | 8.72  | 50.4587156  |
| 7        | 6.36  | 5.68  | -10.6918239 |
| 8        | 6.83  | 2.25  | -67.057101  |
| 9        | 2.87  | 2.41  | -16.0278746 |
| 10       | 1.45  | 3.98  | 63.5678392  |
| 11       | 2.82  | 2     | -29.0780142 |
| 12       | 1.16  | 3.07  | 62.2149837  |
| 13       | 1.32  | 2.66  | 50.3759398  |

**Tables S5.** Variation in cell proportions between iAFnD and NPnD.

| Clusters | iAFnD | NPnD  | % Variation |
|----------|-------|-------|-------------|
| 0        | 18.56 | 18.75 | 1.01333333  |
| 1        | 20.79 | 18.7  | -10.0529101 |
| 2        | 11.31 | 11.09 | -1.94518126 |
| 3        | 8.18  | 7.42  | -9.29095355 |
| 4        | 9.45  | 9.57  | 1.2539185   |
| 5        | 8.18  | 7.34  | -10.2689487 |
| 6        | 3.16  | 4.32  | 26.8518519  |
| 7        | 5.53  | 6.36  | 13.0503145  |
| 8        | 6.32  | 6.83  | 7.4670571   |
| 9        | 2.65  | 2.87  | 7.66550523  |
| 10       | 1.63  | 1.45  | -11.0429448 |
| 11       | 2.11  | 2.82  | 25.177305   |
| 12       | 1.47  | 1.16  | -21.0884354 |
| 13       | 0.67  | 1.32  | 49.2424242  |

**Tables S6.** Variation in cell proportions between iAFnD and NPD.

| Clusters | iAFD  | NPD   | % Variation |
|----------|-------|-------|-------------|
| 0        | 17.92 | 20.68 | 15.401786   |
| 1        | 14.17 | 14.15 | -0.14114326 |
| 2        | 14.29 | 12.95 | -9.37718684 |
| 3        | 9.93  | 11.55 | 16.314199   |
| 4        | 7.12  | 4.28  | -39.8876404 |
| 5        | 7.05  | 5.62  | -20.2836879 |
| 6        | 7.86  | 8.72  | 10.941476   |
| 7        | 3.78  | 5.68  | 50.26455    |
| 8        | 4.98  | 2.25  | -54.8192771 |
| 9        | 3.27  | 2.41  | -26.2996942 |
| 10       | 3.17  | 3.98  | 25.55205    |
| 11       | 2.26  | 2     | -11.5044248 |
| 12       | 3.23  | 3.07  | -4.95356037 |
| 13       | 0.97  | 2.66  | 174.2268    |
