# Supplementary material for: Single-Cell RNA-Seq Analysis of Cells from Degenerating and Non-Degenerating Intervertebral Discs from the Same Individual Reveals New Biomarkers for Intervertebral Disc Degeneration
Source: MDPI journal article supplement (doi:10.3390/ijms23073993), 2022-04-03
Supplement: s1 [file s1]

**Table S26. Donors demographics.**

| Donor ID | Age | Sex | Cause of death      | Disc level | Degeneration   | Cell type | Assays |
|----------|-----|-----|---------------------|------------|----------------|-----------|--------|
| 1        | 28  | M   | Suicide             | S1-L5      | Degenerate     | NP & AF   | Sc-RNA |
|          |     |     |                     | L5-L4      | Non-degenerate |           | qPCR   |
|          |     |     |                     | L4-L1      |                |           | IHC    |
|          |     |     |                     |            |                |           | WB     |
| 2        | 53  | F   | Cardiac arrest      | S1-L4      | Non-degenerate | NP & AF   | qPCR   |
|          |     |     |                     |            |                |           | IHC    |
|          |     |     |                     |            |                |           | WB     |
| 3        | 67  | M   | Cardiac arrest      | L5-L4      | Degenerate     | NP & AF   | qPCR   |
| 4        | 69  | M   | Cerebral hemorrhage | S1-L5      | Degenerate     | NP & AF   | qPCR   |
|          |     |     |                     | L5-L4      | Non-Degenerate |           | IHC    |
|          |     |     |                     |            |                |           | WB     |
| 5        | 20  | F   | Intoxication CVA    | S1-L1      | Non-degenerate | NP & AF   | qPCR   |
|          |     |     |                     |            | Degenerate     |           |        |

|    |    |   |                              |       |                |         |           |
|----|----|---|------------------------------|-------|----------------|---------|-----------|
| 6  | 53 | M | Cerebral aneurysm<br>rupture | S1-L4 | Degenerate     | NP & AF | qPCR      |
|    |    |   |                              | L4-L1 | Non-degenerate |         | IHC<br>WB |
| 7  | 76 | F | Anoxia                       | S1-L2 | Degenerate     | AF      | qPCR      |
| 8  | 72 | M | Intracerebral<br>hemorrhage  | L2-L4 | Degenerate     | NP      | qPCR      |
| 9  | 67 | M | Hemorrhagic<br>stroke        | L2-L5 | Degenerate     | NP & AF | IHC<br>WB |
| 10 | 68 | F | Cerebral<br>hemorrhage       | L2-L5 | Degenerate     | NP & AF | IHC<br>WB |
| 11 | 39 | M | Gunshot                      | S1-L3 | Non-degenerate | NP & AF | IHC<br>WB |
