# Supplementary material for: Single-Cell RNA-Seq Analysis of Cells from Degenerating and Non-Degenerating Intervertebral Discs from the Same Individual Reveals New Biomarkers for Intervertebral Disc Degeneration
Source: MDPI journal article supplement (doi:10.3390/ijms23073993), 2022-04-03
Supplement: s1 [file s1]

**Table S13.** Differentially expressed genes between NPD and NPnD.

| gene      | cluster | avg_logFC  | p_val     | p_val_adj | pct.1 | pct.2 |
|-----------|---------|------------|-----------|-----------|-------|-------|
| SPP1      | 0       | 2.78782255 | 1.54E-199 | 2.82E-195 | 0.897 | 0.086 |
| PRG4      | 0       | 1.90126201 | 1.11E-136 | 2.03E-132 | 0.637 | 0.018 |
| MT2A      | 0       | 1.89772779 | 6.00E-172 | 1.10E-167 | 1     | 0.996 |
| UPP1      | 0       | 1.41408436 | 2.39E-198 | 4.35E-194 | 0.875 | 0.106 |
| HMGA1     | 0       | 1.30616375 | 8.76E-161 | 1.60E-156 | 0.858 | 0.208 |
| PTGS2     | 0       | 1.30474284 | 2.09E-145 | 3.82E-141 | 0.692 | 0.047 |
| SOD2      | 0       | 1.29017351 | 5.31E-117 | 9.68E-113 | 1     | 0.932 |
| CTSL      | 0       | 1.1837381  | 3.65E-92  | 6.65E-88  | 0.809 | 0.383 |
| WTAP      | 0       | 1.18225712 | 2.11E-129 | 3.86E-125 | 0.942 | 0.519 |
| COMP      | 0       | 1.16669886 | 3.20E-99  | 5.85E-95  | 0.951 | 0.6   |
| VEGFA     | 0       | 1.14778831 | 2.47E-136 | 4.50E-132 | 0.863 | 0.313 |
| IGFBP3    | 0       | 1.13277203 | 1.23E-109 | 2.25E-105 | 0.569 | 0.037 |
| S100A2    | 0       | 1.13116397 | 1.35E-93  | 2.46E-89  | 0.72  | 0.233 |
| NRP2      | 0       | 1.08826992 | 1.28E-107 | 2.33E-103 | 0.606 | 0.079 |
| TM4SF1    | 0       | 1.07669152 | 4.17E-89  | 7.62E-85  | 0.777 | 0.324 |
| PLCG2     | 0       | 1.00152984 | 8.90E-38  | 1.62E-33  | 0.279 | 0.037 |
| SERPINE2  | 0       | 0.98230006 | 3.37E-70  | 6.15E-66  | 0.997 | 0.985 |
| CD55      | 0       | 0.97524178 | 4.64E-116 | 8.46E-112 | 0.922 | 0.528 |
| BHLHE40   | 0       | 0.95666799 | 6.14E-85  | 1.12E-80  | 0.728 | 0.314 |
| C11orf96  | 0       | 0.95603502 | 8.01E-99  | 1.46E-94  | 0.528 | 0.033 |
| MT1X      | 0       | 0.92181199 | 3.03E-47  | 5.53E-43  | 0.996 | 0.994 |
| BZW1      | 0       | 0.89574182 | 1.28E-114 | 2.33E-110 | 0.85  | 0.349 |
| STK17A    | 0       | 0.8907205  | 2.64E-93  | 4.82E-89  | 0.623 | 0.134 |
| DDIT4L    | 0       | 0.88975078 | 6.67E-78  | 1.22E-73  | 0.899 | 0.553 |
| ERO1A     | 0       | 0.88788093 | 1.58E-112 | 2.88E-108 | 0.751 | 0.217 |
| TIMP3     | 0       | 0.87113364 | 1.28E-53  | 2.34E-49  | 0.749 | 0.448 |
| TNFRSF12A | 0       | 0.85553223 | 6.97E-93  | 1.27E-88  | 0.601 | 0.11  |
| FN1       | 0       | 0.8379634  | 3.23E-86  | 5.89E-82  | 1     | 0.994 |
| NDRG1     | 0       | 0.83766747 | 2.13E-96  | 3.88E-92  | 0.767 | 0.326 |
| MIF       | 0       | 0.81931684 | 4.24E-162 | 7.73E-158 | 1     | 1     |
| SMOX      | 0       | 0.79743283 | 1.10E-64  | 2.00E-60  | 0.581 | 0.204 |
| MRPS6     | 0       | 0.78122619 | 3.90E-49  | 7.12E-45  | 0.958 | 0.883 |
| CXCL8     | 0       | 0.77989509 | 3.16E-30  | 5.77E-26  | 0.182 | 0.007 |
| PMP22     | 0       | 0.75197113 | 4.28E-87  | 7.82E-83  | 0.926 | 0.617 |
| RNF145    | 0       | 0.75157743 | 2.42E-72  | 4.42E-68  | 0.633 | 0.24  |
| SLC3A2    | 0       | 0.75032419 | 3.23E-70  | 5.90E-66  | 0.619 | 0.232 |

|            |   |            |          |          |       |       |
|------------|---|------------|----------|----------|-------|-------|
| SNHG12     | 0 | 0.74656166 | 7.09E-77 | 1.29E-72 | 0.743 | 0.364 |
| RGCC       | 0 | 0.74192845 | 1.78E-59 | 3.24E-55 | 0.911 | 0.654 |
| CCDC85B    | 0 | 0.73548172 | 1.02E-63 | 1.86E-59 | 0.899 | 0.652 |
| BMP2       | 0 | 0.70424744 | 1.13E-73 | 2.07E-69 | 0.412 | 0.021 |
| RABGGTB    | 0 | 0.70166566 | 2.17E-93 | 3.95E-89 | 0.878 | 0.527 |
| PPP1R15A   | 0 | 0.69668284 | 4.14E-79 | 7.55E-75 | 0.589 | 0.146 |
| SLC2A1     | 0 | 0.69434838 | 2.99E-79 | 5.45E-75 | 0.531 | 0.09  |
| RELB       | 0 | 0.69029411 | 7.42E-77 | 1.35E-72 | 0.566 | 0.131 |
| TREM1      | 0 | 0.67697834 | 1.03E-85 | 1.87E-81 | 0.434 | 0.006 |
| TIMP1      | 0 | 0.66474358 | 2.84E-16 | 5.19E-12 | 1     | 0.999 |
| ARF6       | 0 | 0.66270048 | 4.26E-72 | 7.77E-68 | 0.728 | 0.36  |
| VAPA       | 0 | 0.65037407 | 1.54E-90 | 2.80E-86 | 0.984 | 0.865 |
| TMSB10     | 0 | 0.6460066  | 2.13E-63 | 3.89E-59 | 0.996 | 0.981 |
| ENO2       | 0 | 0.64427492 | 3.74E-78 | 6.82E-74 | 0.668 | 0.252 |
| TMSB4X     | 0 | 0.63092405 | 5.83E-27 | 1.06E-22 | 0.841 | 0.651 |
| ARPP19     | 0 | 0.62451258 | 1.34E-66 | 2.44E-62 | 0.724 | 0.394 |
| GSTO1      | 0 | 0.6127789  | 1.94E-73 | 3.54E-69 | 0.906 | 0.648 |
| TGFBI      | 0 | 0.60966341 | 6.61E-61 | 1.21E-56 | 0.513 | 0.132 |
| EIF4EBP1   | 0 | 0.60529452 | 2.10E-38 | 3.83E-34 | 0.602 | 0.343 |
| PGK1       | 0 | 0.60487818 | 5.84E-66 | 1.07E-61 | 0.958 | 0.778 |
| AK2        | 0 | 0.60255144 | 1.63E-57 | 2.97E-53 | 0.765 | 0.476 |
| ATP6V1G1   | 0 | 0.59342763 | 1.87E-76 | 3.40E-72 | 0.988 | 0.923 |
| BAALC      | 0 | 0.58119376 | 8.86E-31 | 1.62E-26 | 0.545 | 0.323 |
| GOLT1B     | 0 | 0.57801398 | 6.30E-59 | 1.15E-54 | 0.577 | 0.217 |
| ENO1       | 0 | 0.57301533 | 8.03E-56 | 1.46E-51 | 0.993 | 0.972 |
| G0S2       | 0 | 0.57280882 | 1.86E-09 | 3.40E-05 | 0.265 | 0.152 |
| CSGALNACT2 | 0 | 0.56449252 | 3.93E-59 | 7.16E-55 | 0.442 | 0.081 |
| GBE1       | 0 | 0.5605454  | 1.55E-40 | 2.83E-36 | 0.675 | 0.444 |
| HLA-DRB1   | 0 | 0.5577166  | 8.16E-56 | 1.49E-51 | 0.484 | 0.127 |
| PTP4A1     | 0 | 0.55718528 | 3.19E-41 | 5.82E-37 | 0.582 | 0.306 |
| PHLDA1     | 0 | 0.55337871 | 2.27E-50 | 4.15E-46 | 0.301 | 0.017 |
| ISG20      | 0 | 0.55148282 | 1.55E-46 | 2.83E-42 | 0.606 | 0.297 |
| MMP3       | 0 | 0.55099964 | 1.86E-21 | 3.40E-17 | 0.79  | 0.554 |
| DNER       | 0 | 0.5502186  | 7.02E-41 | 1.28E-36 | 0.637 | 0.388 |
| DNAJB9     | 0 | 0.54856595 | 1.77E-43 | 3.22E-39 | 0.78  | 0.524 |
| SLC25A37   | 0 | 0.54624056 | 2.18E-60 | 3.98E-56 | 0.935 | 0.694 |
| PFDN2      | 0 | 0.54464457 | 1.25E-59 | 2.29E-55 | 0.741 | 0.448 |
| ABI3BP     | 0 | 0.5445588  | 6.97E-33 | 1.27E-28 | 0.549 | 0.294 |
| PPFIBP1    | 0 | 0.54351266 | 5.42E-47 | 9.89E-43 | 0.605 | 0.294 |

|          |   |            |          |          |       |       |
|----------|---|------------|----------|----------|-------|-------|
| PPP3CA   | 0 | 0.54156198 | 6.12E-44 | 1.12E-39 | 0.858 | 0.597 |
| CCND1    | 0 | 0.53654814 | 2.93E-62 | 5.34E-58 | 0.424 | 0.058 |
| ZNF593   | 0 | 0.53403785 | 2.52E-53 | 4.60E-49 | 0.663 | 0.338 |
| RGS16    | 0 | 0.53251056 | 2.96E-16 | 5.40E-12 | 0.33  | 0.168 |
| MT1G     | 0 | 0.52559053 | 1.52E-23 | 2.77E-19 | 0.936 | 0.846 |
| KLF3     | 0 | 0.51974845 | 2.57E-36 | 4.69E-32 | 0.464 | 0.19  |
| CLEC2B   | 0 | 0.51689653 | 1.99E-13 | 3.64E-09 | 0.285 | 0.143 |
| TGM2     | 0 | 0.51645548 | 2.04E-53 | 3.72E-49 | 0.504 | 0.148 |
| SGIP1    | 0 | 0.51590244 | 1.55E-66 | 2.82E-62 | 0.363 | 0.011 |
| RNF114   | 0 | 0.51399922 | 1.80E-43 | 3.28E-39 | 0.698 | 0.461 |
| HILPDA   | 0 | 0.51382255 | 8.71E-22 | 1.59E-17 | 0.561 | 0.357 |
| PPP1CB   | 0 | 0.51165008 | 1.47E-34 | 2.68E-30 | 0.847 | 0.628 |
| C15orf48 | 0 | 0.5081878  | 1.81E-37 | 3.31E-33 | 0.219 | 0.007 |
| COX17    | 0 | 0.50201812 | 2.62E-50 | 4.77E-46 | 0.851 | 0.611 |
| DNAJB1   | 0 | 0.50134688 | 1.29E-25 | 2.36E-21 | 0.374 | 0.152 |
| SPRY2    | 0 | 0.49922008 | 1.28E-64 | 2.33E-60 | 0.393 | 0.032 |
| DDIT3    | 0 | 0.49671231 | 1.32E-37 | 2.40E-33 | 0.598 | 0.32  |
| EMP3     | 0 | 0.4882122  | 2.48E-42 | 4.52E-38 | 0.924 | 0.771 |
| SLC7A2   | 0 | 0.48729151 | 5.35E-46 | 9.76E-42 | 0.32  | 0.037 |
| ARF4     | 0 | 0.48348043 | 5.11E-43 | 9.32E-39 | 0.817 | 0.568 |
| PLAUR    | 0 | 0.48341142 | 2.86E-47 | 5.22E-43 | 0.464 | 0.141 |
| TMEM45A  | 0 | 0.48077328 | 1.38E-34 | 2.51E-30 | 0.847 | 0.661 |
| MED21    | 0 | 0.47508721 | 3.18E-38 | 5.80E-34 | 0.599 | 0.317 |
| TMEM38B  | 0 | 0.47504725 | 1.27E-45 | 2.32E-41 | 0.7   | 0.433 |
| EIF5     | 0 | 0.47144216 | 2.82E-42 | 5.15E-38 | 0.712 | 0.426 |
| HMGA2    | 0 | 0.47077812 | 3.56E-67 | 6.49E-63 | 0.347 | 0.001 |
| GPX1     | 0 | 0.46652536 | 2.96E-46 | 5.40E-42 | 0.955 | 0.794 |
| CLK1     | 0 | 0.46626177 | 1.74E-39 | 3.18E-35 | 0.694 | 0.444 |
| ZNF385D  | 0 | 0.4654165  | 2.65E-37 | 4.83E-33 | 0.741 | 0.512 |
| NTMT1    | 0 | 0.46168462 | 2.16E-43 | 3.94E-39 | 0.55  | 0.248 |
| NBPF14   | 0 | 0.46036022 | 5.94E-58 | 1.08E-53 | 0.435 | 0.076 |
| CHD2     | 0 | 0.45511017 | 1.01E-23 | 1.85E-19 | 0.386 | 0.178 |
| GRB10    | 0 | 0.45507561 | 4.21E-58 | 7.69E-54 | 0.324 | 0.01  |
| EPS8     | 0 | 0.45423799 | 1.96E-45 | 3.57E-41 | 0.471 | 0.153 |
| EIF1B    | 0 | 0.45318228 | 2.35E-47 | 4.29E-43 | 0.837 | 0.606 |
| COX7A2   | 0 | 0.45181149 | 5.79E-71 | 1.06E-66 | 0.992 | 0.953 |
| IER3     | 0 | 0.44725588 | 2.87E-26 | 5.24E-22 | 0.365 | 0.139 |
| NPR3     | 0 | 0.44649899 | 3.26E-59 | 5.95E-55 | 0.312 | 0.001 |
| WDR33    | 0 | 0.44561927 | 3.10E-36 | 5.65E-32 | 0.595 | 0.335 |

|            |   |            |          |            |       |       |
|------------|---|------------|----------|------------|-------|-------|
| ANXA5      | 0 | 0.44463907 | 2.02E-43 | 3.69E-39   | 0.916 | 0.73  |
| EIF1       | 0 | 0.44380114 | 1.60E-86 | 2.92E-82   | 1     | 1     |
| SELK       | 0 | 0.44278268 | 1.16E-46 | 2.12E-42   | 0.926 | 0.771 |
| TFPI       | 0 | 0.44158686 | 1.07E-36 | 1.95E-32   | 0.302 | 0.054 |
| FAM162A    | 0 | 0.43972377 | 2.29E-41 | 4.18E-37   | 0.927 | 0.737 |
| XBP1       | 0 | 0.43930062 | 5.15E-30 | 9.40E-26   | 0.706 | 0.513 |
| RND3       | 0 | 0.43870898 | 9.68E-38 | 1.77E-33   | 0.279 | 0.037 |
| WDR45B     | 0 | 0.43528907 | 3.44E-42 | 6.29E-38   | 0.473 | 0.168 |
| KMT2E-AS1  | 0 | 0.43192456 | 3.04E-32 | 5.54E-28   | 0.276 | 0.052 |
| CHI3L2     | 0 | 0.43034422 | 5.90E-13 | 1.08E-08   | 0.554 | 0.415 |
| SQSTM1     | 0 | 0.42630864 | 8.67E-38 | 1.58E-33   | 0.977 | 0.909 |
| CTHRC1     | 0 | 0.42252523 | 8.58E-44 | 1.57E-39   | 0.314 | 0.04  |
| VIMP       | 0 | 0.42075901 | 8.47E-39 | 1.55E-34   | 0.828 | 0.567 |
| VMP1       | 0 | 0.4195411  | 3.84E-23 | 7.01E-19   | 0.609 | 0.414 |
| ADSS       | 0 | 0.41417286 | 7.88E-29 | 1.44E-24   | 0.625 | 0.412 |
| PTGES3     | 0 | 0.41232085 | 1.14E-51 | 2.08E-47   | 0.991 | 0.93  |
| TRMT112    | 0 | 0.41152653 | 4.23E-45 | 7.72E-41   | 0.955 | 0.865 |
| SH3BP5     | 0 | 0.41084195 | 3.00E-26 | 5.48E-22   | 0.511 | 0.291 |
| SAR1A      | 0 | 0.40989703 | 3.89E-32 | 7.11E-28   | 0.553 | 0.301 |
| IFRD1      | 0 | 0.40826968 | 3.13E-28 | 5.71E-24   | 0.635 | 0.455 |
| EVI2A      | 0 | 0.40757259 | 4.37E-39 | 7.97E-35   | 0.351 | 0.079 |
| VDAC1      | 0 | 0.40547767 | 2.07E-34 | 3.78E-30   | 0.907 | 0.752 |
| NOL7       | 0 | 0.40384862 | 5.85E-35 | 1.07E-30   | 0.711 | 0.483 |
| ZFAND5     | 0 | 0.40117494 | 6.03E-29 | 1.10E-24   | 0.618 | 0.396 |
| SH3BGRL3   | 0 | 0.39948407 | 1.09E-42 | 2.00E-38   | 0.991 | 0.96  |
| HNRNPDL    | 0 | 0.39279463 | 3.28E-36 | 5.98E-32   | 0.87  | 0.672 |
| PID1       | 0 | 0.3906557  | 6.25E-27 | 1.14E-22   | 0.645 | 0.433 |
| YAF2       | 0 | 0.39043162 | 5.16E-34 | 9.42E-30   | 0.463 | 0.193 |
| PDE4B      | 0 | 0.38852208 | 5.59E-29 | 1.02E-24   | 0.389 | 0.141 |
| NFKBIA     | 0 | 0.38764989 | 1.50E-15 | 2.74E-11   | 0.39  | 0.221 |
| CRTAC1     | 0 | 0.38653075 | 3.84E-30 | 7.01E-26   | 0.321 | 0.09  |
| CTNNB1     | 0 | 0.38527351 | 2.74E-14 | 5.01E-10   | 0.406 | 0.247 |
| BTG3       | 0 | 0.38465314 | 2.67E-32 | 4.87E-28   | 0.477 | 0.208 |
| RIPK2      | 0 | 0.38418941 | 1.78E-37 | 3.26E-33   | 0.387 | 0.112 |
| GADD45GIP1 | 0 | 0.38380464 | 8.77E-36 | 1.60E-31   | 0.855 | 0.663 |
| NT5E       | 0 | 0.38363614 | 6.24E-29 | 1.14E-24   | 0.407 | 0.164 |
| SNRNP27    | 0 | 0.38183602 | 3.63E-30 | 6.62E-26   | 0.54  | 0.295 |
| FOSL1      | 0 | 0.38090155 | 4.07E-43 | 7.43E-39   | 0.284 | 0.025 |
| FABP5      | 0 | 0.37452847 | 4.60E-08 | 0.00083927 | 0.362 | 0.248 |

|           |   |            |          |            |       |       |
|-----------|---|------------|----------|------------|-------|-------|
| RGS2      | 0 | 0.36878569 | 8.38E-09 | 0.00015292 | 0.499 | 0.383 |
| SEC61G    | 0 | 0.3685909  | 1.21E-28 | 2.21E-24   | 0.995 | 0.992 |
| CLDND1    | 0 | 0.36730428 | 1.14E-28 | 2.08E-24   | 0.493 | 0.25  |
| C2orf49   | 0 | 0.36544086 | 1.93E-39 | 3.52E-35   | 0.428 | 0.135 |
| EIF4A2    | 0 | 0.36491972 | 5.76E-50 | 1.05E-45   | 1     | 0.999 |
| RNMT      | 0 | 0.36277337 | 4.16E-23 | 7.59E-19   | 0.475 | 0.261 |
| FAP       | 0 | 0.36241542 | 3.60E-40 | 6.56E-36   | 0.358 | 0.08  |
| RHEB      | 0 | 0.36188234 | 2.47E-27 | 4.51E-23   | 0.873 | 0.735 |
| FNIP2     | 0 | 0.3587928  | 2.07E-24 | 3.77E-20   | 0.403 | 0.179 |
| SLC20A1   | 0 | 0.35746691 | 2.91E-33 | 5.32E-29   | 0.344 | 0.094 |
| SAP18     | 0 | 0.35658248 | 1.24E-30 | 2.26E-26   | 0.873 | 0.734 |
| SERPINE1  | 0 | 0.35633887 | 1.70E-42 | 3.11E-38   | 0.279 | 0.023 |
| CGGBP1    | 0 | 0.35530445 | 1.76E-27 | 3.21E-23   | 0.538 | 0.312 |
| POMP      | 0 | 0.35493206 | 8.72E-33 | 1.59E-28   | 0.877 | 0.709 |
| TNS1      | 0 | 0.35416343 | 1.73E-38 | 3.16E-34   | 0.382 | 0.101 |
| CAPZA2    | 0 | 0.35366561 | 1.61E-26 | 2.94E-22   | 0.753 | 0.578 |
| OSER1     | 0 | 0.35322903 | 7.73E-25 | 1.41E-20   | 0.462 | 0.237 |
| TVP23B    | 0 | 0.35056658 | 2.76E-30 | 5.03E-26   | 0.464 | 0.208 |
| C11orf31  | 0 | 0.34706115 | 5.28E-30 | 9.63E-26   | 0.84  | 0.641 |
| RNF126    | 0 | 0.34601765 | 2.48E-31 | 4.52E-27   | 0.412 | 0.157 |
| CDC37L1   | 0 | 0.34578244 | 4.34E-21 | 7.92E-17   | 0.485 | 0.299 |
| SLC25A36  | 0 | 0.34444347 | 7.10E-24 | 1.30E-19   | 0.56  | 0.348 |
| PPP1R14C  | 0 | 0.3422112  | 1.09E-41 | 1.99E-37   | 0.313 | 0.046 |
| CTTN      | 0 | 0.34160047 | 2.56E-15 | 4.67E-11   | 0.467 | 0.316 |
| SMS       | 0 | 0.33984022 | 3.99E-18 | 7.28E-14   | 0.599 | 0.447 |
| MSANTD3   | 0 | 0.33957615 | 7.78E-33 | 1.42E-28   | 0.394 | 0.131 |
| RPL22L1   | 0 | 0.33909127 | 4.12E-23 | 7.52E-19   | 0.725 | 0.56  |
| S100A16   | 0 | 0.33715143 | 6.51E-18 | 1.19E-13   | 0.41  | 0.236 |
| SVIP      | 0 | 0.33536516 | 8.72E-21 | 1.59E-16   | 0.592 | 0.411 |
| LINC00152 | 0 | 0.33426325 | 1.59E-18 | 2.89E-14   | 0.35  | 0.167 |
| OAZ1      | 0 | 0.33140884 | 3.07E-44 | 5.60E-40   | 1     | 0.994 |
| RAB13     | 0 | 0.33001813 | 3.61E-23 | 6.59E-19   | 0.908 | 0.801 |
| TRAM1     | 0 | 0.32972918 | 2.93E-23 | 5.35E-19   | 0.842 | 0.681 |
| HSPA5     | 0 | 0.32664878 | 2.27E-14 | 4.14E-10   | 0.435 | 0.276 |
| UFM1      | 0 | 0.32641229 | 1.44E-21 | 2.63E-17   | 0.605 | 0.399 |
| CD44      | 0 | 0.32571908 | 1.90E-27 | 3.46E-23   | 0.922 | 0.737 |
| DAB2      | 0 | 0.32507763 | 5.46E-22 | 9.96E-18   | 0.46  | 0.244 |
| SH3GLB1   | 0 | 0.32439306 | 3.26E-21 | 5.94E-17   | 0.676 | 0.526 |
| ADM       | 0 | 0.3240606  | 1.12E-09 | 2.04E-05   | 0.757 | 0.634 |

|              |   |            |          |            |       |       |
|--------------|---|------------|----------|------------|-------|-------|
| AKIRIN2      | 0 | 0.32373748 | 5.48E-31 | 1.00E-26   | 0.378 | 0.128 |
| IL11         | 0 | 0.32350485 | 1.15E-24 | 2.10E-20   | 0.135 | 0     |
| RPF2         | 0 | 0.32275091 | 1.25E-27 | 2.28E-23   | 0.435 | 0.19  |
| MRPL41       | 0 | 0.31695159 | 6.19E-21 | 1.13E-16   | 0.707 | 0.559 |
| C4orf48      | 0 | 0.31603142 | 1.20E-26 | 2.19E-22   | 0.344 | 0.116 |
| GPRC5A       | 0 | 0.31556803 | 1.21E-34 | 2.21E-30   | 0.344 | 0.084 |
| PAIP2        | 0 | 0.31402605 | 1.14E-21 | 2.08E-17   | 0.747 | 0.577 |
| SRSF3        | 0 | 0.31380436 | 6.85E-18 | 1.25E-13   | 0.765 | 0.628 |
| PAPOLA       | 0 | 0.31370816 | 2.09E-19 | 3.81E-15   | 0.646 | 0.492 |
| LINC-PINT    | 0 | 0.31138287 | 1.36E-23 | 2.49E-19   | 0.281 | 0.087 |
| FAM210A      | 0 | 0.31135379 | 4.88E-29 | 8.91E-25   | 0.405 | 0.156 |
| WSB1         | 0 | 0.31045304 | 4.54E-18 | 8.28E-14   | 0.796 | 0.644 |
| NXT1         | 0 | 0.30993114 | 1.26E-24 | 2.31E-20   | 0.508 | 0.272 |
| CISD2        | 0 | 0.30936159 | 8.03E-19 | 1.47E-14   | 0.537 | 0.353 |
| SFT2D1       | 0 | 0.30933626 | 4.72E-24 | 8.61E-20   | 0.744 | 0.585 |
| METAP2       | 0 | 0.30922182 | 1.10E-25 | 2.00E-21   | 0.838 | 0.684 |
| TIMM10B      | 0 | 0.30668634 | 7.02E-24 | 1.28E-19   | 0.386 | 0.168 |
| STRAP        | 0 | 0.30647051 | 1.15E-16 | 2.09E-12   | 0.561 | 0.412 |
| CRLF1        | 0 | 0.30572539 | 2.68E-26 | 4.89E-22   | 0.281 | 0.074 |
| BNIP3        | 0 | 0.30483416 | 4.51E-25 | 8.23E-21   | 0.995 | 0.985 |
| KLHL21       | 0 | 0.30432494 | 4.66E-27 | 8.50E-23   | 0.321 | 0.101 |
| ATP6V0B      | 0 | 0.30430237 | 1.27E-18 | 2.32E-14   | 0.592 | 0.426 |
| GULP1        | 0 | 0.30422493 | 1.66E-23 | 3.03E-19   | 0.353 | 0.142 |
| HDAC2        | 0 | 0.30356512 | 1.10E-18 | 2.00E-14   | 0.497 | 0.323 |
| POLR1D       | 0 | 0.30212105 | 1.02E-23 | 1.87E-19   | 0.863 | 0.713 |
| CTD-2095E4.5 | 0 | 0.30089801 | 9.56E-28 | 1.74E-23   | 0.206 | 0.025 |
| LINC00493    | 0 | 0.29960286 | 1.17E-30 | 2.13E-26   | 0.95  | 0.826 |
| SLC5A3       | 0 | 0.29941733 | 1.17E-07 | 0.00212609 | 0.479 | 0.381 |
| TYMP         | 0 | 0.29828833 | 1.22E-14 | 2.22E-10   | 0.415 | 0.247 |
| UBE2B        | 0 | 0.29677601 | 1.10E-20 | 2.01E-16   | 0.824 | 0.712 |
| CCT8         | 0 | 0.29544157 | 9.54E-20 | 1.74E-15   | 0.755 | 0.614 |
| SREK1IP1     | 0 | 0.29394126 | 1.06E-18 | 1.94E-14   | 0.446 | 0.254 |
| CLIC4        | 0 | 0.29271958 | 1.50E-15 | 2.74E-11   | 0.467 | 0.302 |
| USMG5        | 0 | 0.2917268  | 1.14E-25 | 2.08E-21   | 0.954 | 0.892 |
| ZFAND2A      | 0 | 0.29168648 | 5.50E-32 | 1.00E-27   | 0.338 | 0.091 |
| NDUFB8       | 0 | 0.29136452 | 1.63E-13 | 2.97E-09   | 0.764 | 0.677 |
| PDS5A        | 0 | 0.28977951 | 1.87E-30 | 3.42E-26   | 0.342 | 0.101 |
| ACTR10       | 0 | 0.28952723 | 9.15E-20 | 1.67E-15   | 0.488 | 0.292 |
| PTBP3        | 0 | 0.28933243 | 6.74E-30 | 1.23E-25   | 0.357 | 0.112 |

|            |   |            |          |          |       |       |
|------------|---|------------|----------|----------|-------|-------|
| GJA1       | 0 | 0.28882348 | 2.72E-23 | 4.97E-19 | 0.261 | 0.073 |
| CNIH1      | 0 | 0.28827201 | 5.65E-18 | 1.03E-13 | 0.805 | 0.651 |
| RAB1A      | 0 | 0.28811556 | 4.96E-17 | 9.05E-13 | 0.729 | 0.57  |
| ATP6V1C1   | 0 | 0.28804365 | 2.23E-20 | 4.06E-16 | 0.42  | 0.223 |
| MT1H       | 0 | 0.28791255 | 1.32E-09 | 2.41E-05 | 0.638 | 0.468 |
| CCDC107    | 0 | 0.28730797 | 3.15E-17 | 5.76E-13 | 0.52  | 0.352 |
| SYF2       | 0 | 0.28695277 | 1.45E-23 | 2.64E-19 | 0.943 | 0.825 |
| AC090498.1 | 0 | 0.28665436 | 3.92E-66 | 7.16E-62 | 1     | 1     |
| KCNMA1     | 0 | 0.28636838 | 3.62E-09 | 6.61E-05 | 0.548 | 0.423 |
| ZFYVE16    | 0 | 0.28571363 | 1.25E-29 | 2.27E-25 | 0.324 | 0.09  |
| NFKBIZ     | 0 | 0.28507403 | 9.31E-22 | 1.70E-17 | 0.326 | 0.126 |
| VMA21      | 0 | 0.28446407 | 5.95E-28 | 1.09E-23 | 0.367 | 0.128 |
| SNRPB2     | 0 | 0.28368279 | 1.25E-14 | 2.29E-10 | 0.638 | 0.512 |
| CHMP5      | 0 | 0.28347077 | 3.85E-18 | 7.02E-14 | 0.642 | 0.481 |
| OVOS2      | 0 | 0.28272805 | 1.85E-22 | 3.37E-18 | 0.202 | 0.039 |
| UQCC2      | 0 | 0.28189066 | 1.20E-15 | 2.19E-11 | 0.505 | 0.349 |
| MRPL51     | 0 | 0.28177863 | 3.05E-22 | 5.56E-18 | 0.889 | 0.761 |
| ATP6V0E1   | 0 | 0.28120346 | 2.31E-21 | 4.22E-17 | 0.902 | 0.76  |
| SNHG15     | 0 | 0.28070736 | 4.87E-28 | 8.88E-24 | 0.321 | 0.095 |
| NUDT21     | 0 | 0.28044903 | 3.00E-17 | 5.48E-13 | 0.52  | 0.35  |
| MRPL57     | 0 | 0.27963698 | 3.00E-18 | 5.47E-14 | 0.834 | 0.716 |
| IMP4       | 0 | 0.27735037 | 2.40E-19 | 4.38E-15 | 0.504 | 0.305 |
| NOP10      | 0 | 0.27649606 | 2.26E-19 | 4.11E-15 | 0.765 | 0.603 |
| RHOD       | 0 | 0.27631969 | 1.67E-14 | 3.05E-10 | 0.459 | 0.302 |
| COX6B1     | 0 | 0.27535218 | 5.48E-30 | 9.99E-26 | 0.992 | 0.964 |
| LAMTOR5    | 0 | 0.27495297 | 3.56E-19 | 6.50E-15 | 0.845 | 0.701 |
| NDUFC1     | 0 | 0.2748172  | 7.95E-20 | 1.45E-15 | 0.897 | 0.774 |
| AKAP12     | 0 | 0.27293135 | 1.01E-23 | 1.85E-19 | 0.237 | 0.055 |
| TAF1D      | 0 | 0.27280366 | 1.04E-14 | 1.90E-10 | 0.706 | 0.601 |
| POLR2H     | 0 | 0.2727698  | 1.82E-16 | 3.33E-12 | 0.483 | 0.309 |
| CCDC59     | 0 | 0.27175927 | 3.58E-14 | 6.53E-10 | 0.503 | 0.354 |
| AIMP1      | 0 | 0.27040074 | 3.93E-15 | 7.18E-11 | 0.676 | 0.526 |
| MOB4       | 0 | 0.26987063 | 2.60E-18 | 4.75E-14 | 0.363 | 0.175 |
| HSP90AA1   | 0 | 0.26945164 | 4.72E-09 | 8.61E-05 | 0.798 | 0.734 |
| LRRFIP1    | 0 | 0.26929015 | 2.67E-15 | 4.87E-11 | 0.427 | 0.255 |
| FHL2       | 0 | 0.2692123  | 1.90E-28 | 3.47E-24 | 0.277 | 0.063 |
| NDUFA6     | 0 | 0.26890317 | 1.68E-14 | 3.07E-10 | 0.553 | 0.406 |
| PPP1R2     | 0 | 0.26820676 | 8.18E-17 | 1.49E-12 | 0.496 | 0.321 |
| MRPL50     | 0 | 0.2665149  | 3.65E-14 | 6.65E-10 | 0.361 | 0.208 |

|              |   |            |          |            |       |       |
|--------------|---|------------|----------|------------|-------|-------|
| RNF19B       | 0 | 0.26443041 | 3.57E-31 | 6.51E-27   | 0.269 | 0.05  |
| CDKN2B       | 0 | 0.26388238 | 9.26E-37 | 1.69E-32   | 0.243 | 0.019 |
| SCAND1       | 0 | 0.26368356 | 5.65E-17 | 1.03E-12   | 0.635 | 0.469 |
| EXOSC4       | 0 | 0.26270372 | 5.16E-21 | 9.42E-17   | 0.363 | 0.16  |
| SNRPD1       | 0 | 0.26175461 | 4.18E-16 | 7.63E-12   | 0.622 | 0.468 |
| PELI1        | 0 | 0.26126563 | 1.00E-20 | 1.83E-16   | 0.237 | 0.068 |
| NAMPT        | 0 | 0.26055016 | 7.01E-15 | 1.28E-10   | 0.537 | 0.37  |
| KITLG        | 0 | 0.26040615 | 2.35E-19 | 4.30E-15   | 0.334 | 0.145 |
| CCDC174      | 0 | 0.26032134 | 6.41E-20 | 1.17E-15   | 0.42  | 0.208 |
| ATF4         | 0 | 0.26001642 | 3.91E-19 | 7.13E-15   | 0.966 | 0.919 |
| PLOD2        | 0 | 0.25960907 | 1.19E-12 | 2.18E-08   | 0.741 | 0.608 |
| MAR5         | 0 | 0.25947642 | 7.44E-19 | 1.36E-14   | 0.451 | 0.252 |
| EPB41L4A-AS1 | 0 | 0.25771212 | 2.12E-21 | 3.87E-17   | 0.964 | 0.892 |
| SPHK1        | 0 | 0.25585333 | 4.85E-23 | 8.84E-19   | 0.252 | 0.068 |
| C16orf13     | 0 | 0.25580005 | 4.88E-16 | 8.91E-12   | 0.806 | 0.68  |
| MRPL54       | 0 | 0.25574471 | 1.08E-13 | 1.97E-09   | 0.472 | 0.314 |
| DDX21        | 0 | 0.25557883 | 7.37E-22 | 1.34E-17   | 0.393 | 0.178 |
| ANKRD10      | 0 | 0.25408884 | 1.31E-15 | 2.39E-11   | 0.358 | 0.188 |
| CA9          | 0 | 0.25337537 | 1.69E-18 | 3.08E-14   | 0.268 | 0.097 |
| EMC2         | 0 | 0.25321607 | 1.49E-11 | 2.72E-07   | 0.541 | 0.412 |
| ITGA5        | 0 | 0.25075833 | 7.28E-26 | 1.33E-21   | 0.24  | 0.05  |
| ZC3H15       | 0 | 0.2503728  | 5.02E-14 | 9.16E-10   | 0.585 | 0.428 |
| ERRFI1       | 0 | 0.25033728 | 4.20E-08 | 0.00076636 | 0.305 | 0.201 |
| SMDT1        | 0 | -0.2503721 | 1.07E-16 | 1.95E-12   | 0.55  | 0.716 |
| EIF4EBP2     | 0 | -0.2504724 | 8.22E-30 | 1.50E-25   | 0.09  | 0.327 |
| IGBP1        | 0 | -0.251099  | 9.86E-14 | 1.80E-09   | 0.617 | 0.732 |
| TRAPPC1      | 0 | -0.2516322 | 3.32E-22 | 6.07E-18   | 0.229 | 0.466 |
| NHP2         | 0 | -0.2518615 | 4.73E-21 | 8.63E-17   | 0.296 | 0.535 |
| CYHR1        | 0 | -0.2520831 | 7.80E-23 | 1.42E-18   | 0.184 | 0.41  |
| MRPS21       | 0 | -0.2521365 | 1.26E-20 | 2.30E-16   | 0.797 | 0.899 |
| RPS3         | 0 | -0.2523708 | 1.90E-77 | 3.47E-73   | 1     | 1     |
| ANAPC16      | 0 | -0.2525476 | 2.27E-22 | 4.14E-18   | 0.822 | 0.927 |
| UGP2         | 0 | -0.2531141 | 2.50E-19 | 4.56E-15   | 0.416 | 0.652 |
| MT-ND5       | 0 | -0.254056  | 1.32E-10 | 2.41E-06   | 0.431 | 0.553 |
| RPL6         | 0 | -0.2542469 | 1.20E-50 | 2.18E-46   | 1     | 1     |
| NDUFA3       | 0 | -0.2553968 | 5.40E-19 | 9.85E-15   | 0.349 | 0.578 |
| PDGFRA       | 0 | -0.2563159 | 7.11E-33 | 1.30E-28   | 0.046 | 0.272 |
| PGLS         | 0 | -0.2565167 | 9.63E-17 | 1.76E-12   | 0.541 | 0.705 |
| MAOB         | 0 | -0.2565382 | 4.28E-19 | 7.81E-15   | 0.2   | 0.407 |



|              |   |            |          |          |       |       |
|--------------|---|------------|----------|----------|-------|-------|
| SOCS3        | 0 | -0.2567865 | 1.18E-23 | 2.15E-19 | 0.081 | 0.277 |
| TMEM98       | 0 | -0.2578248 | 2.20E-27 | 4.02E-23 | 0.095 | 0.32  |
| NUCB2        | 0 | -0.2579099 | 4.41E-20 | 8.05E-16 | 0.187 | 0.396 |
| CCDC14       | 0 | -0.2582177 | 5.42E-24 | 9.89E-20 | 0.129 | 0.349 |
| MIR99AHG     | 0 | -0.258545  | 1.19E-36 | 2.17E-32 | 0.038 | 0.276 |
| CAMLG        | 0 | -0.2598145 | 8.62E-19 | 1.57E-14 | 0.729 | 0.85  |
| ZFAND1       | 0 | -0.2601801 | 4.46E-17 | 8.13E-13 | 0.491 | 0.687 |
| FKBP10       | 0 | -0.2604496 | 8.15E-24 | 1.49E-19 | 0.182 | 0.418 |
| CHPT1        | 0 | -0.260496  | 1.98E-17 | 3.62E-13 | 0.46  | 0.661 |
| NUCKS1       | 0 | -0.2614478 | 9.50E-17 | 1.73E-12 | 0.452 | 0.619 |
| JUN          | 0 | -0.2614589 | 3.09E-20 | 5.64E-16 | 0.109 | 0.298 |
| GSTP1        | 0 | -0.2617049 | 3.32E-21 | 6.05E-17 | 0.927 | 0.963 |
| TMEM230      | 0 | -0.2619507 | 1.24E-18 | 2.27E-14 | 0.521 | 0.709 |
| FGGY         | 0 | -0.2626061 | 2.18E-32 | 3.97E-28 | 0.084 | 0.331 |
| SLC44A1      | 0 | -0.2628096 | 3.10E-22 | 5.66E-18 | 0.155 | 0.367 |
| RP11-553L6.5 | 0 | -0.2638021 | 1.93E-30 | 3.52E-26 | 0.09  | 0.33  |
| GPAA1        | 0 | -0.2644193 | 6.58E-27 | 1.20E-22 | 0.142 | 0.381 |
| FHL1         | 0 | -0.2646605 | 1.88E-22 | 3.44E-18 | 0.237 | 0.473 |
| LRPAP1       | 0 | -0.2659665 | 3.19E-17 | 5.82E-13 | 0.289 | 0.481 |
| CSDE1        | 0 | -0.267804  | 2.22E-18 | 4.06E-14 | 0.651 | 0.817 |
| TUBB         | 0 | -0.2681127 | 3.78E-20 | 6.89E-16 | 0.775 | 0.89  |
| DPP7         | 0 | -0.2681468 | 1.55E-19 | 2.83E-15 | 0.467 | 0.683 |
| GADD45A      | 0 | -0.2684592 | 1.21E-09 | 2.20E-05 | 0.407 | 0.545 |
| RPS29        | 0 | -0.268615  | 1.81E-69 | 3.31E-65 | 1     | 1     |
| CD302        | 0 | -0.2687952 | 1.27E-33 | 2.31E-29 | 0.06  | 0.298 |
| ASPN         | 0 | -0.2704944 | 8.17E-20 | 1.49E-15 | 0.023 | 0.157 |
| ATP5A1       | 0 | -0.2716041 | 5.06E-17 | 9.24E-13 | 0.398 | 0.582 |
| H1FO         | 0 | -0.2722047 | 6.68E-11 | 1.22E-06 | 0.21  | 0.352 |
| FAM200B      | 0 | -0.2728805 | 1.46E-25 | 2.66E-21 | 0.18  | 0.423 |
| SCARA3       | 0 | -0.273455  | 1.05E-35 | 1.91E-31 | 0.061 | 0.312 |
| SSR4         | 0 | -0.2740518 | 1.44E-23 | 2.63E-19 | 0.908 | 0.96  |
| MTDH         | 0 | -0.2741433 | 7.78E-17 | 1.42E-12 | 0.492 | 0.666 |
| FIS1         | 0 | -0.2745116 | 8.45E-20 | 1.54E-15 | 0.496 | 0.702 |
| CCDC88A      | 0 | -0.2745932 | 2.22E-29 | 4.05E-25 | 0.089 | 0.32  |
| TMED10       | 0 | -0.2755063 | 1.84E-20 | 3.36E-16 | 0.747 | 0.88  |
| RARRES3      | 0 | -0.2758151 | 8.79E-44 | 1.60E-39 | 0.017 | 0.268 |
| CALM3        | 0 | -0.2765489 | 2.85E-19 | 5.21E-15 | 0.488 | 0.691 |
| BEX2         | 0 | -0.2770106 | 9.18E-23 | 1.67E-18 | 0.203 | 0.437 |
| LAMTOR1      | 0 | -0.2795162 | 1.57E-21 | 2.86E-17 | 0.411 | 0.63  |

|          |   |            |           |           |       |       |
|----------|---|------------|-----------|-----------|-------|-------|
| SMIM19   | 0 | -0.2800329 | 1.86E-21  | 3.39E-17  | 0.269 | 0.492 |
| TRPS1    | 0 | -0.2808965 | 7.50E-20  | 1.37E-15  | 0.224 | 0.433 |
| COL6A2   | 0 | -0.2816762 | 9.84E-16  | 1.80E-11  | 0.344 | 0.521 |
| HINT1    | 0 | -0.282762  | 5.61E-35  | 1.02E-30  | 0.987 | 1     |
| RPS9     | 0 | -0.2829346 | 1.25E-82  | 2.28E-78  | 1     | 1     |
| ARL2BP   | 0 | -0.2832822 | 5.70E-18  | 1.04E-13  | 0.34  | 0.531 |
| KDEL2    | 0 | -0.2835349 | 1.07E-24  | 1.95E-20  | 0.711 | 0.897 |
| N4BP2L2  | 0 | -0.2844201 | 9.07E-22  | 1.66E-17  | 0.597 | 0.79  |
| C19orf43 | 0 | -0.2844893 | 2.80E-26  | 5.11E-22  | 0.763 | 0.901 |
| GRN      | 0 | -0.2853979 | 3.29E-37  | 6.01E-33  | 0.068 | 0.33  |
| RPS4X    | 0 | -0.2854146 | 2.42E-87  | 4.41E-83  | 1     | 1     |
| PLPP1    | 0 | -0.2855785 | 5.26E-28  | 9.59E-24  | 0.068 | 0.279 |
| SRSF5    | 0 | -0.2856383 | 3.43E-21  | 6.25E-17  | 0.444 | 0.669 |
| RPL15    | 0 | -0.286385  | 9.66E-106 | 1.76E-101 | 1     | 1     |
| BHLHE41  | 0 | -0.2868331 | 4.62E-28  | 8.43E-24  | 0.118 | 0.357 |
| HSPD1    | 0 | -0.288129  | 3.10E-19  | 5.66E-15  | 0.499 | 0.679 |
| AHNAK2   | 0 | -0.289075  | 9.65E-25  | 1.76E-20  | 0.223 | 0.473 |
| DBP      | 0 | -0.290668  | 1.31E-32  | 2.40E-28  | 0.094 | 0.345 |
| COL9A2   | 0 | -0.2913247 | 8.77E-29  | 1.60E-24  | 0.092 | 0.323 |
| RPL13    | 0 | -0.291582  | 2.88E-107 | 5.25E-103 | 1     | 1     |
| SNRPA    | 0 | -0.2916973 | 2.42E-31  | 4.41E-27  | 0.123 | 0.379 |
| RPL8     | 0 | -0.2917324 | 1.73E-93  | 3.16E-89  | 1     | 1     |
| RPSA     | 0 | -0.2918012 | 1.44E-48  | 2.62E-44  | 1     | 1     |
| COMMD6   | 0 | -0.2929122 | 1.90E-48  | 3.46E-44  | 0.991 | 1     |
| RPS17    | 0 | -0.2940428 | 3.96E-70  | 7.22E-66  | 1     | 1     |
| TMEM59   | 0 | -0.2941527 | 6.97E-28  | 1.27E-23  | 0.955 | 0.99  |
| PAM      | 0 | -0.2954267 | 6.23E-23  | 1.14E-18  | 0.279 | 0.519 |
| CMPK1    | 0 | -0.2955614 | 1.02E-23  | 1.86E-19  | 0.607 | 0.818 |
| DYNLT1   | 0 | -0.2961858 | 1.61E-27  | 2.95E-23  | 0.239 | 0.501 |
| TNFRSF1A | 0 | -0.2965732 | 1.89E-23  | 3.45E-19  | 0.22  | 0.446 |
| CD320    | 0 | -0.297344  | 6.04E-24  | 1.10E-19  | 0.186 | 0.412 |
| RPL7A    | 0 | -0.2974366 | 4.48E-81  | 8.17E-77  | 1     | 1     |
| NUPR1    | 0 | -0.2982075 | 4.49E-33  | 8.19E-29  | 0.969 | 0.992 |
| IFI27L2  | 0 | -0.2985301 | 5.01E-23  | 9.15E-19  | 0.666 | 0.844 |
| HMG3     | 0 | -0.2988278 | 2.86E-31  | 5.23E-27  | 0.145 | 0.414 |
| ETFB     | 0 | -0.2989025 | 4.92E-24  | 8.98E-20  | 0.268 | 0.499 |
| SERP1    | 0 | -0.2994374 | 5.47E-18  | 9.99E-14  | 0.418 | 0.612 |
| CHMP3    | 0 | -0.2996703 | 1.05E-21  | 1.92E-17  | 0.358 | 0.578 |
| RPS5     | 0 | -0.3001259 | 1.03E-83  | 1.87E-79  | 1     | 1     |

|              |   |            |           |           |       |       |
|--------------|---|------------|-----------|-----------|-------|-------|
| MYLK         | 0 | -0.3016808 | 1.79E-33  | 3.27E-29  | 0.058 | 0.292 |
| PNISR        | 0 | -0.3018993 | 2.06E-21  | 3.76E-17  | 0.521 | 0.701 |
| IGFBP6       | 0 | -0.3019767 | 2.00E-18  | 3.65E-14  | 0.302 | 0.517 |
| GSTA4        | 0 | -0.3023832 | 8.08E-34  | 1.47E-29  | 0.13  | 0.401 |
| ERGIC3       | 0 | -0.302402  | 2.65E-24  | 4.84E-20  | 0.623 | 0.837 |
| EIF3J-AS1    | 0 | -0.3037752 | 4.38E-38  | 7.99E-34  | 0.105 | 0.389 |
| RPL13A       | 0 | -0.3039261 | 8.27E-111 | 1.51E-106 | 1     | 1     |
| RPS4Y1       | 0 | -0.3041947 | 7.67E-47  | 1.40E-42  | 0.989 | 1     |
| CANX         | 0 | -0.3070134 | 2.70E-24  | 4.92E-20  | 0.521 | 0.742 |
| PPIC         | 0 | -0.3076169 | 3.88E-27  | 7.07E-23  | 0.149 | 0.383 |
| PLA2G16      | 0 | -0.3087883 | 8.15E-28  | 1.49E-23  | 0.191 | 0.448 |
| RPL10        | 0 | -0.3099167 | 5.48E-109 | 1.00E-104 | 1     | 1     |
| AC005152.3   | 0 | -0.3107264 | 9.58E-43  | 1.75E-38  | 0.029 | 0.287 |
| MKX          | 0 | -0.3109774 | 4.02E-33  | 7.34E-29  | 0.065 | 0.301 |
| CMB9-22P13.1 | 0 | -0.3118538 | 5.20E-23  | 9.48E-19  | 0.264 | 0.491 |
| RPS6         | 0 | -0.3120995 | 6.74E-109 | 1.23E-104 | 1     | 1     |
| ARL6IP5      | 0 | -0.3122103 | 1.56E-24  | 2.84E-20  | 0.375 | 0.617 |
| DUT          | 0 | -0.3122188 | 9.87E-27  | 1.80E-22  | 0.398 | 0.657 |
| CTSF         | 0 | -0.3130713 | 4.60E-40  | 8.38E-36  | 0.073 | 0.352 |
| RPS7         | 0 | -0.3134477 | 4.39E-83  | 8.01E-79  | 1     | 1     |
| ITM2B        | 0 | -0.3139721 | 1.37E-33  | 2.51E-29  | 0.952 | 0.988 |
| RNF130       | 0 | -0.3160739 | 8.77E-25  | 1.60E-20  | 0.386 | 0.621 |
| LRP10        | 0 | -0.3161907 | 2.28E-25  | 4.15E-21  | 0.218 | 0.455 |
| SEP1         | 0 | -0.3173562 | 8.93E-41  | 1.63E-36  | 0.097 | 0.394 |
| C10orf10     | 0 | -0.3185345 | 1.18E-10  | 2.14E-06  | 0.444 | 0.583 |
| MORF4L2      | 0 | -0.3207261 | 1.11E-23  | 2.03E-19  | 0.387 | 0.617 |
| RPS13        | 0 | -0.3232376 | 2.23E-90  | 4.07E-86  | 1     | 1     |
| C1S          | 0 | -0.3243585 | 4.67E-27  | 8.53E-23  | 0.408 | 0.672 |
| ABHD14B      | 0 | -0.3247953 | 3.95E-34  | 7.21E-30  | 0.206 | 0.501 |
| OS9          | 0 | -0.3252073 | 9.00E-28  | 1.64E-23  | 0.279 | 0.534 |
| UMAD1        | 0 | -0.3266271 | 2.63E-31  | 4.81E-27  | 0.174 | 0.44  |
| TMED2        | 0 | -0.3267604 | 3.25E-29  | 5.93E-25  | 0.605 | 0.844 |
| RPL5         | 0 | -0.3277681 | 1.07E-80  | 1.96E-76  | 1     | 1     |
| GLTSCR2      | 0 | -0.3277708 | 1.53E-34  | 2.79E-30  | 0.897 | 0.971 |
| OXA1L        | 0 | -0.3278796 | 4.25E-24  | 7.76E-20  | 0.459 | 0.668 |
| TPD52L1      | 0 | -0.3283987 | 2.81E-26  | 5.13E-22  | 0.239 | 0.484 |
| H1FX         | 0 | -0.3284316 | 1.58E-36  | 2.88E-32  | 0.069 | 0.327 |
| ATP5D        | 0 | -0.3286449 | 6.59E-34  | 1.20E-29  | 0.817 | 0.941 |
| RPS23        | 0 | -0.3290307 | 7.28E-107 | 1.33E-102 | 1     | 1     |

|            |   |            |           |           |       |       |
|------------|---|------------|-----------|-----------|-------|-------|
| TCEA2      | 0 | -0.3304407 | 1.01E-34  | 1.84E-30  | 0.186 | 0.472 |
| SARAF      | 0 | -0.3314053 | 3.36E-26  | 6.14E-22  | 0.495 | 0.714 |
| ARPC1A     | 0 | -0.3315954 | 8.94E-31  | 1.63E-26  | 0.282 | 0.566 |
| SPINT2     | 0 | -0.331656  | 8.81E-34  | 1.61E-29  | 0.142 | 0.418 |
| VAMP5      | 0 | -0.3318283 | 3.61E-30  | 6.59E-26  | 0.225 | 0.491 |
| HEXB       | 0 | -0.3319508 | 9.85E-26  | 1.80E-21  | 0.253 | 0.487 |
| SUMF2      | 0 | -0.3321411 | 1.48E-31  | 2.69E-27  | 0.207 | 0.483 |
| PRCP       | 0 | -0.3367916 | 1.25E-43  | 2.28E-39  | 0.064 | 0.35  |
| HSPB1      | 0 | -0.33691   | 2.81E-25  | 5.12E-21  | 0.54  | 0.749 |
| SLC25A3    | 0 | -0.337895  | 7.14E-36  | 1.30E-31  | 0.873 | 0.972 |
| CRIP2      | 0 | -0.3407812 | 4.61E-32  | 8.42E-28  | 0.216 | 0.492 |
| HADHA      | 0 | -0.3427821 | 4.72E-33  | 8.61E-29  | 0.24  | 0.523 |
| MYL6       | 0 | -0.3430422 | 8.94E-38  | 1.63E-33  | 0.857 | 0.957 |
| AC003090.1 | 0 | -0.3445343 | 3.37E-55  | 6.15E-51  | 0.023 | 0.331 |
| PTPRD-AS1  | 0 | -0.3462457 | 1.96E-30  | 3.58E-26  | 0.211 | 0.474 |
| RPL30      | 0 | -0.3467772 | 6.17E-93  | 1.13E-88  | 1     | 1     |
| TCEA3      | 0 | -0.347269  | 5.30E-36  | 9.68E-32  | 0.151 | 0.434 |
| LTA4H      | 0 | -0.3479562 | 9.11E-28  | 1.66E-23  | 0.411 | 0.655 |
| ANGPTL2    | 0 | -0.3488194 | 1.44E-27  | 2.62E-23  | 0.206 | 0.455 |
| MFGE8      | 0 | -0.349763  | 3.52E-24  | 6.42E-20  | 0.699 | 0.873 |
| HLA-B      | 0 | -0.3512859 | 9.95E-27  | 1.82E-22  | 0.595 | 0.826 |
| HSP90AB1   | 0 | -0.3515489 | 1.55E-42  | 2.83E-38  | 0.968 | 0.994 |
| RPS27A     | 0 | -0.3517893 | 3.46E-119 | 6.31E-115 | 1     | 1     |
| RPLP2      | 0 | -0.3524268 | 9.41E-115 | 1.72E-110 | 1     | 1     |
| GREM1      | 0 | -0.3527254 | 4.04E-39  | 7.37E-35  | 0.001 | 0.208 |
| ENAH       | 0 | -0.3532082 | 3.75E-46  | 6.85E-42  | 0.07  | 0.375 |
| SDC2       | 0 | -0.3533916 | 8.69E-37  | 1.59E-32  | 0.577 | 0.848 |
| PABPC4     | 0 | -0.3539961 | 3.83E-28  | 6.98E-24  | 0.422 | 0.658 |
| ILF3-AS1   | 0 | -0.3539987 | 1.30E-36  | 2.38E-32  | 0.153 | 0.441 |
| DNM3OS     | 0 | -0.3545347 | 5.03E-42  | 9.18E-38  | 0.068 | 0.349 |
| POLR2L     | 0 | -0.3549956 | 8.18E-33  | 1.49E-28  | 0.688 | 0.865 |
| ARL6IP4    | 0 | -0.3551216 | 1.34E-40  | 2.44E-36  | 0.78  | 0.938 |
| CHRD2      | 0 | -0.3551776 | 1.80E-34  | 3.29E-30  | 0.053 | 0.288 |
| BEX4       | 0 | -0.355184  | 4.18E-34  | 7.64E-30  | 0.314 | 0.626 |
| VKORC1     | 0 | -0.3556469 | 3.08E-38  | 5.62E-34  | 0.847 | 0.953 |
| MIA        | 0 | -0.3574351 | 5.31E-24  | 9.68E-20  | 0.915 | 0.953 |
| ZBTB20     | 0 | -0.3575686 | 1.70E-42  | 3.10E-38  | 0.119 | 0.428 |
| TPM2       | 0 | -0.3600912 | 1.59E-30  | 2.91E-26  | 0.269 | 0.546 |
| SLC29A1    | 0 | -0.361092  | 6.06E-37  | 1.10E-32  | 0.202 | 0.508 |

|           |   |            |           |           |       |       |
|-----------|---|------------|-----------|-----------|-------|-------|
| LDHB      | 0 | -0.3614173 | 6.32E-34  | 1.15E-29  | 0.671 | 0.868 |
| TOMM7     | 0 | -0.361877  | 4.60E-89  | 8.39E-85  | 1     | 1     |
| LITAF     | 0 | -0.3627075 | 5.52E-32  | 1.01E-27  | 0.281 | 0.56  |
| VCAN      | 0 | -0.3627874 | 2.22E-39  | 4.05E-35  | 0.093 | 0.381 |
| PRDX5     | 0 | -0.3629582 | 4.03E-39  | 7.35E-35  | 0.779 | 0.938 |
| CPE       | 0 | -0.3637168 | 7.07E-28  | 1.29E-23  | 0.565 | 0.779 |
| DMKN      | 0 | -0.364127  | 1.05E-36  | 1.91E-32  | 0.215 | 0.519 |
| RABAC1    | 0 | -0.364147  | 7.89E-34  | 1.44E-29  | 0.655 | 0.876 |
| NPM1      | 0 | -0.3641623 | 1.52E-59  | 2.76E-55  | 1     | 1     |
| RBMX      | 0 | -0.3647455 | 2.46E-31  | 4.49E-27  | 0.592 | 0.808 |
| NMRK1     | 0 | -0.3647622 | 1.02E-34  | 1.86E-30  | 0.196 | 0.483 |
| C1orf21   | 0 | -0.3658147 | 2.15E-35  | 3.91E-31  | 0.292 | 0.6   |
| PPIA      | 0 | -0.3664499 | 5.80E-47  | 1.06E-42  | 0.926 | 0.982 |
| ATRAID    | 0 | -0.3665605 | 5.80E-35  | 1.06E-30  | 0.601 | 0.844 |
| PPT1      | 0 | -0.3670277 | 3.46E-42  | 6.31E-38  | 0.125 | 0.432 |
| RPL14     | 0 | -0.3673208 | 1.06E-118 | 1.93E-114 | 1     | 1     |
| IER2      | 0 | -0.3684792 | 2.94E-29  | 5.36E-25  | 0.184 | 0.441 |
| PDE4DIP   | 0 | -0.3690684 | 5.67E-36  | 1.03E-31  | 0.204 | 0.499 |
| ENPP1     | 0 | -0.3693437 | 4.69E-51  | 8.55E-47  | 0.048 | 0.356 |
| PNRC1     | 0 | -0.3704567 | 6.94E-49  | 1.27E-44  | 0.923 | 0.996 |
| PIK3R1    | 0 | -0.3708355 | 4.85E-33  | 8.84E-29  | 0.046 | 0.269 |
| RPL23     | 0 | -0.3709534 | 2.13E-77  | 3.88E-73  | 0.999 | 1     |
| TMEM219   | 0 | -0.3713081 | 1.16E-34  | 2.12E-30  | 0.519 | 0.759 |
| SH3BGRL   | 0 | -0.3724593 | 2.49E-34  | 4.54E-30  | 0.298 | 0.583 |
| RPS2      | 0 | -0.3740862 | 1.64E-126 | 3.00E-122 | 1     | 1     |
| RPL19     | 0 | -0.3741764 | 6.44E-138 | 1.17E-133 | 1     | 1     |
| PLD3      | 0 | -0.3754103 | 1.86E-37  | 3.40E-33  | 0.237 | 0.548 |
| RPL3      | 0 | -0.3755027 | 1.78E-109 | 3.25E-105 | 1     | 1     |
| BSG       | 0 | -0.3759079 | 9.75E-35  | 1.78E-30  | 0.428 | 0.71  |
| HDLBP     | 0 | -0.3769551 | 3.33E-32  | 6.07E-28  | 0.267 | 0.539 |
| EBPL      | 0 | -0.3777183 | 5.37E-44  | 9.79E-40  | 0.18  | 0.509 |
| PPP1R3C   | 0 | -0.3783513 | 6.32E-24  | 1.15E-19  | 0.221 | 0.443 |
| FAM46A    | 0 | -0.3785435 | 4.16E-19  | 7.59E-15  | 0.326 | 0.516 |
| ST13      | 0 | -0.3788697 | 4.43E-51  | 8.07E-47  | 0.943 | 0.986 |
| LRRC2     | 0 | -0.3793359 | 9.70E-45  | 1.77E-40  | 0.085 | 0.386 |
| SSPN      | 0 | -0.3807055 | 7.06E-54  | 1.29E-49  | 0.049 | 0.374 |
| RPL9      | 0 | -0.3814822 | 1.51E-120 | 2.75E-116 | 1     | 1     |
| C7orf73   | 0 | -0.3821885 | 1.09E-36  | 2.00E-32  | 0.459 | 0.77  |
| LINC01503 | 0 | -0.3905378 | 8.06E-30  | 1.47E-25  | 0.16  | 0.418 |

|               |   |            |           |           |       |       |
|---------------|---|------------|-----------|-----------|-------|-------|
| NDUFA11       | 0 | -0.3916614 | 1.33E-42  | 2.42E-38  | 0.772 | 0.938 |
| RPL18         | 0 | -0.3973797 | 8.85E-120 | 1.61E-115 | 1     | 1     |
| CALR          | 0 | -0.4000368 | 1.39E-31  | 2.54E-27  | 0.391 | 0.648 |
| BTF3          | 0 | -0.4005725 | 1.24E-77  | 2.26E-73  | 0.996 | 0.999 |
| SERPINA5      | 0 | -0.4010882 | 3.77E-38  | 6.88E-34  | 0.186 | 0.48  |
| PDIA3         | 0 | -0.4027949 | 2.13E-36  | 3.89E-32  | 0.284 | 0.572 |
| EIF3E         | 0 | -0.4049702 | 1.53E-62  | 2.79E-58  | 0.997 | 1     |
| RP11-983P16.4 | 0 | -0.4061522 | 3.67E-51  | 6.70E-47  | 0.131 | 0.486 |
| AHNAK         | 0 | -0.4071046 | 4.03E-41  | 7.36E-37  | 0.214 | 0.532 |
| HIST1H1C      | 0 | -0.407794  | 8.34E-19  | 1.52E-14  | 0.275 | 0.481 |
| BAMBI         | 0 | -0.4083637 | 8.50E-21  | 1.55E-16  | 0.375 | 0.579 |
| CYBRD1        | 0 | -0.4103259 | 1.33E-39  | 2.43E-35  | 0.389 | 0.691 |
| CTSD          | 0 | -0.4111631 | 2.03E-46  | 3.71E-42  | 0.721 | 0.931 |
| TCEAL8        | 0 | -0.4140478 | 2.05E-38  | 3.74E-34  | 0.497 | 0.752 |
| NUCB1         | 0 | -0.4148058 | 3.63E-38  | 6.62E-34  | 0.345 | 0.639 |
| THY1          | 0 | -0.4149807 | 1.39E-42  | 2.54E-38  | 0.076 | 0.36  |
| CUTA          | 0 | -0.4157201 | 7.87E-44  | 1.44E-39  | 0.639 | 0.891 |
| AP2M1         | 0 | -0.4167485 | 1.27E-36  | 2.31E-32  | 0.344 | 0.617 |
| SSR2          | 0 | -0.4168002 | 7.87E-48  | 1.44E-43  | 0.739 | 0.917 |
| CREG1         | 0 | -0.4175269 | 8.04E-41  | 1.47E-36  | 0.374 | 0.677 |
| FGF7          | 0 | -0.4179972 | 9.52E-38  | 1.74E-33  | 0.09  | 0.374 |
| EIF3D         | 0 | -0.4183049 | 3.37E-43  | 6.15E-39  | 0.67  | 0.863 |
| PRDX4         | 0 | -0.4186315 | 1.13E-39  | 2.06E-35  | 0.443 | 0.749 |
| RPS16         | 0 | -0.4190397 | 3.77E-136 | 6.88E-132 | 1     | 1     |
| S100A4        | 0 | -0.4206886 | 2.10E-21  | 3.83E-17  | 0.533 | 0.731 |
| RPL34         | 0 | -0.4283634 | 2.57E-144 | 4.69E-140 | 1     | 1     |
| TSPAN4        | 0 | -0.4288239 | 1.16E-44  | 2.12E-40  | 0.186 | 0.516 |
| EFNA1         | 0 | -0.4299254 | 3.23E-46  | 5.90E-42  | 0.158 | 0.495 |
| CXXC5         | 0 | -0.4355457 | 1.57E-59  | 2.87E-55  | 0.061 | 0.417 |
| FCGRT         | 0 | -0.4370522 | 1.50E-41  | 2.74E-37  | 0.286 | 0.599 |
| FTL           | 0 | -0.4398594 | 4.41E-91  | 8.06E-87  | 1     | 1     |
| SEPP1         | 0 | -0.4400003 | 6.69E-44  | 1.22E-39  | 0.17  | 0.498 |
| CHID1         | 0 | -0.4406125 | 4.46E-48  | 8.13E-44  | 0.236 | 0.579 |
| GNAS          | 0 | -0.4423683 | 6.84E-43  | 1.25E-38  | 0.354 | 0.662 |
| PIM3          | 0 | -0.4437918 | 9.37E-33  | 1.71E-28  | 0.328 | 0.597 |
| CTGF          | 0 | -0.4439868 | 3.63E-26  | 6.62E-22  | 0.163 | 0.4   |
| RPL23A        | 0 | -0.4453627 | 1.80E-153 | 3.28E-149 | 1     | 1     |
| IFITM2        | 0 | -0.4455085 | 2.46E-47  | 4.48E-43  | 0.775 | 0.942 |
| EEF1B2        | 0 | -0.4457941 | 1.93E-73  | 3.52E-69  | 0.985 | 1     |

|          |   |            |           |           |       |       |
|----------|---|------------|-----------|-----------|-------|-------|
| ATRN1    | 0 | -0.4484618 | 3.63E-60  | 6.63E-56  | 0.048 | 0.396 |
| EIF2S3   | 0 | -0.4521457 | 4.90E-40  | 8.94E-36  | 0.423 | 0.723 |
| TTC3     | 0 | -0.454512  | 1.71E-44  | 3.12E-40  | 0.401 | 0.724 |
| ITM2A    | 0 | -0.457438  | 1.92E-45  | 3.50E-41  | 0.204 | 0.532 |
| RPS3A    | 0 | -0.458207  | 1.11E-155 | 2.02E-151 | 1     | 1     |
| EIF2A    | 0 | -0.4583025 | 8.33E-47  | 1.52E-42  | 0.603 | 0.84  |
| MT-ND4   | 0 | -0.4597139 | 1.32E-21  | 2.41E-17  | 0.928 | 0.892 |
| S100A1   | 0 | -0.4603073 | 2.50E-68  | 4.57E-64  | 0.999 | 1     |
| HLA-A    | 0 | -0.4621974 | 7.90E-50  | 1.44E-45  | 0.764 | 0.949 |
| TSPO     | 0 | -0.4630243 | 5.47E-50  | 9.98E-46  | 0.607 | 0.883 |
| ATPIF1   | 0 | -0.4659293 | 2.92E-49  | 5.32E-45  | 0.402 | 0.732 |
| SSR3     | 0 | -0.4680195 | 2.21E-52  | 4.04E-48  | 0.806 | 0.949 |
| CCDC102B | 0 | -0.4726868 | 7.74E-76  | 1.41E-71  | 0.011 | 0.394 |
| CCNG1    | 0 | -0.4746581 | 8.48E-53  | 1.55E-48  | 0.233 | 0.597 |
| GOLIM4   | 0 | -0.4747287 | 4.37E-38  | 7.97E-34  | 0.167 | 0.459 |
| SEC11A   | 0 | -0.4761774 | 3.41E-68  | 6.22E-64  | 0.797 | 0.977 |
| MDFI     | 0 | -0.4766445 | 7.90E-55  | 1.44E-50  | 0.15  | 0.512 |
| PTRF     | 0 | -0.4884989 | 1.87E-54  | 3.40E-50  | 0.162 | 0.523 |
| HIST1H4C | 0 | -0.4899506 | 8.53E-42  | 1.56E-37  | 0.281 | 0.593 |
| SDF4     | 0 | -0.4908179 | 1.37E-51  | 2.51E-47  | 0.385 | 0.705 |
| NAP1L1   | 0 | -0.4911779 | 1.04E-78  | 1.90E-74  | 0.947 | 0.993 |
| S100A13  | 0 | -0.4936164 | 2.16E-86  | 3.94E-82  | 0.987 | 1     |
| ARHGAP29 | 0 | -0.4948037 | 1.50E-51  | 2.73E-47  | 0.149 | 0.506 |
| NFIA     | 0 | -0.4990751 | 3.69E-75  | 6.73E-71  | 0.069 | 0.494 |
| PLXDC2   | 0 | -0.5039815 | 1.06E-51  | 1.94E-47  | 0.227 | 0.588 |
| PCBP2    | 0 | -0.5110359 | 8.63E-72  | 1.58E-67  | 0.805 | 0.971 |
| PSAP     | 0 | -0.5142557 | 1.80E-63  | 3.29E-59  | 0.743 | 0.95  |
| HLA-C    | 0 | -0.5143687 | 8.59E-53  | 1.57E-48  | 0.753 | 0.932 |
| CYR61    | 0 | -0.5175429 | 4.76E-43  | 8.69E-39  | 0.084 | 0.374 |
| NOVA1    | 0 | -0.5190402 | 2.69E-33  | 4.91E-29  | 0.794 | 0.921 |
| XAGE2    | 0 | -0.5191038 | 2.58E-33  | 4.70E-29  | 0.009 | 0.199 |
| YBX1     | 0 | -0.5211905 | 1.05E-95  | 1.92E-91  | 0.962 | 0.999 |
| RPLP0    | 0 | -0.5264855 | 5.20E-150 | 9.48E-146 | 1     | 1     |
| IGFBP7   | 0 | -0.5265603 | 3.53E-38  | 6.44E-34  | 0.599 | 0.846 |
| RPL7     | 0 | -0.5342597 | 4.67E-140 | 8.52E-136 | 1     | 1     |
| GSN      | 0 | -0.5382119 | 2.06E-51  | 3.75E-47  | 0.235 | 0.586 |
| DDR2     | 0 | -0.5421004 | 1.87E-62  | 3.42E-58  | 0.184 | 0.585 |
| BGN      | 0 | -0.5460818 | 6.84E-76  | 1.25E-71  | 0.967 | 1     |
| SPON2    | 0 | -0.5462076 | 2.83E-71  | 5.16E-67  | 0.036 | 0.421 |

|          |   |            |           |           |       |       |
|----------|---|------------|-----------|-----------|-------|-------|
| PDIA6    | 0 | -0.5464786 | 2.34E-65  | 4.27E-61  | 0.3   | 0.699 |
| TPT1     | 0 | -0.5475027 | 6.16E-153 | 1.12E-148 | 1     | 1     |
| BRK1     | 0 | -0.5506386 | 5.53E-72  | 1.01E-67  | 0.609 | 0.903 |
| FTH1     | 0 | -0.5520779 | 1.76E-98  | 3.22E-94  | 1     | 1     |
| HMG2N1   | 0 | -0.5527749 | 5.57E-78  | 1.02E-73  | 0.779 | 0.966 |
| NPC2     | 0 | -0.5531937 | 3.42E-95  | 6.24E-91  | 0.955 | 0.997 |
| COL11A1  | 0 | -0.5602096 | 5.32E-67  | 9.70E-63  | 0.279 | 0.708 |
| CRISPLD1 | 0 | -0.5602706 | 1.74E-65  | 3.18E-61  | 0.007 | 0.342 |
| CLU      | 0 | -0.5627176 | 1.76E-42  | 3.21E-38  | 0.996 | 1     |
| PCOLCE2  | 0 | -0.5644972 | 4.39E-63  | 8.01E-59  | 0.72  | 0.942 |
| SOD3     | 0 | -0.56579   | 9.66E-45  | 1.76E-40  | 0.867 | 0.971 |
| H3F3A    | 0 | -0.5687586 | 3.88E-92  | 7.08E-88  | 0.899 | 0.994 |
| ITM2C    | 0 | -0.5695851 | 4.07E-64  | 7.43E-60  | 0.145 | 0.537 |
| DUSP1    | 0 | -0.5714515 | 5.79E-54  | 1.06E-49  | 0.267 | 0.65  |
| PRUNE2   | 0 | -0.5762622 | 3.10E-70  | 5.66E-66  | 0.141 | 0.57  |
| SLC14A1  | 0 | -0.5771407 | 8.13E-72  | 1.48E-67  | 0.102 | 0.524 |
| SNAI2    | 0 | -0.5991182 | 8.82E-48  | 1.61E-43  | 0.221 | 0.553 |
| EIF4B    | 0 | -0.6002239 | 5.94E-85  | 1.08E-80  | 0.712 | 0.949 |
| CFH      | 0 | -0.6028101 | 7.96E-33  | 1.45E-28  | 0.131 | 0.385 |
| INHBA    | 0 | -0.6028153 | 6.99E-69  | 1.27E-64  | 0.088 | 0.501 |
| PEBP1    | 0 | -0.603178  | 1.98E-80  | 3.62E-76  | 0.593 | 0.903 |
| RPL10A   | 0 | -0.6114019 | 4.58E-162 | 8.36E-158 | 1     | 1     |
| CD9      | 0 | -0.6132973 | 2.52E-66  | 4.60E-62  | 0.245 | 0.655 |
| ISLR     | 0 | -0.6138744 | 6.65E-88  | 1.21E-83  | 0.045 | 0.499 |
| EIF3L    | 0 | -0.6150135 | 8.11E-91  | 1.48E-86  | 0.719 | 0.967 |
| SLC40A1  | 0 | -0.6237985 | 5.23E-84  | 9.54E-80  | 0.012 | 0.429 |
| FBXO2    | 0 | -0.6327672 | 4.04E-87  | 7.38E-83  | 0.418 | 0.846 |
| TCF4     | 0 | -0.6332041 | 1.82E-74  | 3.32E-70  | 0.11  | 0.539 |
| VIM      | 0 | -0.6352794 | 2.31E-111 | 4.22E-107 | 1     | 1     |
| RPS8     | 0 | -0.640163  | 1.71E-193 | 3.12E-189 | 1     | 1     |
| GAS6     | 0 | -0.6414544 | 2.70E-86  | 4.92E-82  | 0.07  | 0.531 |
| RPL4     | 0 | -0.6500806 | 7.89E-152 | 1.44E-147 | 1     | 1     |
| ACTG1    | 0 | -0.6539366 | 8.51E-91  | 1.55E-86  | 0.955 | 0.996 |
| EID1     | 0 | -0.65598   | 7.19E-105 | 1.31E-100 | 0.744 | 0.979 |
| CTSC     | 0 | -0.6618985 | 2.88E-52  | 5.26E-48  | 0.077 | 0.404 |
| RPS11    | 0 | -0.6633326 | 1.91E-158 | 3.48E-154 | 0.995 | 1     |
| NNMT     | 0 | -0.6640032 | 2.69E-71  | 4.90E-67  | 0.782 | 0.954 |
| CRTAP    | 0 | -0.6720623 | 4.14E-94  | 7.55E-90  | 0.428 | 0.843 |
| ID4      | 0 | -0.6734361 | 1.59E-68  | 2.90E-64  | 0.288 | 0.705 |



|         |   |            |           |           |       |       |
|---------|---|------------|-----------|-----------|-------|-------|
| HNRNPA1 | 0 | -0.683615  | 4.96E-125 | 9.04E-121 | 0.983 | 1     |
| PTMS    | 0 | -0.688513  | 1.02E-95  | 1.87E-91  | 0.332 | 0.81  |
| PABPC1  | 0 | -0.6918922 | 7.83E-109 | 1.43E-104 | 0.755 | 0.972 |
| FOS     | 0 | -0.6969234 | 1.34E-83  | 2.45E-79  | 0.297 | 0.767 |
| RPS20   | 0 | -0.6978453 | 1.46E-179 | 2.66E-175 | 0.997 | 1     |
| CITED2  | 0 | -0.7145248 | 3.71E-72  | 6.77E-68  | 0.147 | 0.579 |
| EIF3H   | 0 | -0.7149858 | 1.10E-140 | 2.01E-136 | 0.956 | 0.999 |
| HTRA1   | 0 | -0.7153292 | 1.13E-90  | 2.06E-86  | 0.418 | 0.866 |
| SPARC   | 0 | -0.7191531 | 3.98E-107 | 7.26E-103 | 0.125 | 0.673 |
| CCNI    | 0 | -0.7354868 | 1.17E-156 | 2.13E-152 | 0.988 | 1     |
| S100B   | 0 | -0.7356834 | 6.96E-94  | 1.27E-89  | 0.436 | 0.873 |
| FMOD    | 0 | -0.7358102 | 1.50E-105 | 2.74E-101 | 0.627 | 0.95  |
| FXVD6   | 0 | -0.7470278 | 4.28E-101 | 7.80E-97  | 0.497 | 0.902 |
| ID2     | 0 | -0.7489817 | 2.73E-69  | 4.98E-65  | 0.306 | 0.71  |
| MALAT1  | 0 | -0.7516333 | 1.14E-92  | 2.09E-88  | 1     | 1     |
| PRELP   | 0 | -0.753914  | 6.72E-93  | 1.23E-88  | 0.771 | 0.978 |
| MT-ND1  | 0 | -0.7703336 | 1.59E-78  | 2.90E-74  | 0.272 | 0.71  |
| MT-CO1  | 0 | -0.7721942 | 2.68E-44  | 4.89E-40  | 0.914 | 0.913 |
| P4HB    | 0 | -0.7894883 | 1.16E-106 | 2.12E-102 | 0.495 | 0.921 |
| MT-CO3  | 0 | -0.7895884 | 4.37E-51  | 7.98E-47  | 0.805 | 0.866 |
| CCDC80  | 0 | -0.794751  | 2.95E-82  | 5.38E-78  | 0.706 | 0.96  |
| CEBPD   | 0 | -0.7977284 | 3.80E-80  | 6.93E-76  | 0.664 | 0.93  |
| C2orf40 | 0 | -0.8006764 | 3.44E-88  | 6.27E-84  | 0.93  | 0.999 |
| YBX3    | 0 | -0.8094213 | 1.01E-121 | 1.85E-117 | 0.621 | 0.967 |
| RBP4    | 0 | -0.8211461 | 2.59E-100 | 4.73E-96  | 0.312 | 0.797 |
| EEF2    | 0 | -0.8226749 | 5.16E-130 | 9.42E-126 | 0.979 | 0.999 |
| JUNB    | 0 | -0.8299082 | 8.11E-93  | 1.48E-88  | 0.334 | 0.812 |
| NGFRAP1 | 0 | -0.8303483 | 3.21E-128 | 5.85E-124 | 0.492 | 0.953 |
| APOD    | 0 | -0.8312576 | 5.88E-64  | 1.07E-59  | 0.141 | 0.535 |
| EEF1A1  | 0 | -0.8504049 | 1.11E-219 | 2.02E-215 | 1     | 1     |
| B2M     | 0 | -0.8567177 | 1.40E-152 | 2.55E-148 | 0.958 | 1     |
| CST3    | 0 | -0.8635364 | 8.68E-132 | 1.58E-127 | 0.954 | 1     |
| TSC22D1 | 0 | -0.8640457 | 1.96E-82  | 3.57E-78  | 0.398 | 0.823 |
| COL9A3  | 0 | -0.8795755 | 1.61E-88  | 2.94E-84  | 0.22  | 0.703 |
| CD99    | 0 | -0.8798483 | 1.14E-151 | 2.08E-147 | 0.711 | 0.99  |
| MT-ND3  | 0 | -0.8943939 | 4.00E-81  | 7.30E-77  | 0.314 | 0.752 |
| COL2A1  | 0 | -0.9027009 | 6.20E-134 | 1.13E-129 | 0.194 | 0.811 |
| CP      | 0 | -0.917685  | 3.08E-116 | 5.61E-112 | 0.357 | 0.861 |
| CHI3L1  | 0 | -0.9219301 | 1.69E-74  | 3.08E-70  | 0.886 | 0.992 |

| DCN     | 0       | -0.9272984 | 6.48E-165 | 1.18E-160 | 0.999 | 1     |
|---------|---------|------------|-----------|-----------|-------|-------|
| MT-ND2  | 0       | -0.9383228 | 7.42E-82  | 1.35E-77  | 0.31  | 0.739 |
| LECT1   | 0       | -0.960562  | 6.45E-109 | 1.18E-104 | 0.334 | 0.857 |
| RHOBTB3 | 0       | -0.9659423 | 4.89E-133 | 8.91E-129 | 0.249 | 0.823 |
| MT-CYB  | 0       | -0.9762734 | 3.16E-86  | 5.77E-82  | 0.361 | 0.782 |
| MT-ATP6 | 0       | -0.9770279 | 3.68E-76  | 6.71E-72  | 0.562 | 0.843 |
| MT-CO2  | 0       | -0.9987681 | 4.11E-67  | 7.51E-63  | 0.85  | 0.919 |
| ZFP36L2 | 0       | -1.0329534 | 1.46E-101 | 2.67E-97  | 0.141 | 0.661 |
| PAX1    | 0       | -1.035802  | 5.60E-151 | 1.02E-146 | 0.296 | 0.879 |
| NEAT1   | 0       | -1.0670119 | 4.71E-157 | 8.60E-153 | 0.984 | 0.999 |
| ID1     | 0       | -1.090274  | 8.17E-103 | 1.49E-98  | 0.231 | 0.77  |
| ADIRF   | 0       | -1.122142  | 3.16E-121 | 5.77E-117 | 0.281 | 0.826 |
| GPX3    | 0       | -1.1439251 | 1.04E-160 | 1.90E-156 | 0.769 | 0.996 |
| C2orf82 | 0       | -1.1678843 | 3.05E-137 | 5.57E-133 | 0.919 | 1     |
| ACAN    | 0       | -1.1787417 | 7.73E-168 | 1.41E-163 | 0.71  | 0.994 |
| PLAC9   | 0       | -1.2177514 | 1.35E-173 | 2.46E-169 | 0.34  | 0.952 |
| MGP     | 0       | -1.2419585 | 1.43E-131 | 2.60E-127 | 0.997 | 1     |
| CAPS    | 0       | -1.2630857 | 9.57E-151 | 1.75E-146 | 0.371 | 0.941 |
| SLPI    | 0       | -1.2711762 | 7.93E-139 | 1.45E-134 | 0.735 | 0.993 |
| ID3     | 0       | -1.3412884 | 2.55E-144 | 4.65E-140 | 0.143 | 0.792 |
| SPTSSB  | 0       | -1.5913478 | 3.27E-159 | 5.97E-155 | 0.02  | 0.698 |
| CLEC3A  | 0       | -1.6602139 | 4.04E-205 | 7.38E-201 | 0.066 | 0.866 |
| OGN     | 0       | -1.7488939 | 5.94E-178 | 1.08E-173 | 0.537 | 0.977 |
| FRZB    | 0       | -1.8932571 | 4.54E-149 | 8.28E-145 | 0.253 | 0.897 |
| gene    | cluster | avg_logFC  | p_val     | p_val_adj | pct.1 | pct.2 |
| SPP1    | 1       | 2.93989577 | 9.32E-166 | 1.70E-161 | 0.891 | 0.104 |
| PRG4    | 1       | 2.42779019 | 1.80E-124 | 3.28E-120 | 0.651 | 0.033 |
| MT2A    | 1       | 2.01806853 | 7.98E-142 | 1.46E-137 | 1     | 0.99  |
| SOD2    | 1       | 1.66428839 | 1.28E-137 | 2.34E-133 | 1     | 0.811 |
| COMP    | 1       | 1.55726827 | 6.31E-108 | 1.15E-103 | 0.979 | 0.763 |
| S100A2  | 1       | 1.45585353 | 4.64E-88  | 8.47E-84  | 0.723 | 0.21  |
| IGFBP3  | 1       | 1.45408205 | 5.38E-112 | 9.82E-108 | 0.605 | 0.03  |
| UPP1    | 1       | 1.41491547 | 1.21E-156 | 2.21E-152 | 0.804 | 0.082 |
| PTGS2   | 1       | 1.40580688 | 1.29E-144 | 2.35E-140 | 0.721 | 0.033 |
| VEGFA   | 1       | 1.22869872 | 9.56E-117 | 1.74E-112 | 0.866 | 0.343 |
| CTSL    | 1       | 1.18473345 | 2.64E-85  | 4.82E-81  | 0.795 | 0.332 |
| DDIT4L  | 1       | 1.15222151 | 1.60E-94  | 2.92E-90  | 0.909 | 0.523 |
| FN1     | 1       | 1.13708404 | 1.06E-123 | 1.94E-119 | 1     | 0.992 |
| HMGA1   | 1       | 1.12767504 | 1.79E-94  | 3.26E-90  | 0.725 | 0.207 |

|           |   |            |           |           |       |       |
|-----------|---|------------|-----------|-----------|-------|-------|
| TM4SF1    | 1 | 1.09938032 | 2.33E-75  | 4.25E-71  | 0.748 | 0.297 |
| CD55      | 1 | 1.08105414 | 2.21E-106 | 4.04E-102 | 0.926 | 0.503 |
| MMP3      | 1 | 1.0336714  | 5.60E-44  | 1.02E-39  | 0.895 | 0.643 |
| MT1X      | 1 | 1.01908047 | 3.80E-46  | 6.94E-42  | 0.996 | 0.99  |
| TIMP3     | 1 | 1.00496349 | 5.58E-54  | 1.02E-49  | 0.766 | 0.422 |
| STK17A    | 1 | 0.99735264 | 2.56E-98  | 4.67E-94  | 0.647 | 0.104 |
| TIMP1     | 1 | 0.99223098 | 5.99E-34  | 1.09E-29  | 1     | 0.999 |
| BZW1      | 1 | 0.99065477 | 2.05E-101 | 3.73E-97  | 0.857 | 0.383 |
| C11orf96  | 1 | 0.97762761 | 8.75E-92  | 1.60E-87  | 0.533 | 0.035 |
| NRP2      | 1 | 0.95333764 | 2.33E-88  | 4.26E-84  | 0.597 | 0.094 |
| ERO1A     | 1 | 0.91990776 | 1.12E-88  | 2.05E-84  | 0.812 | 0.365 |
| TNFRSF12A | 1 | 0.90821976 | 1.73E-91  | 3.15E-87  | 0.628 | 0.105 |
| WTAP      | 1 | 0.90556872 | 1.01E-91  | 1.85E-87  | 0.891 | 0.447 |
| BHLHE40   | 1 | 0.90424984 | 1.58E-69  | 2.89E-65  | 0.754 | 0.382 |
| SMOX      | 1 | 0.89147039 | 1.29E-64  | 2.35E-60  | 0.601 | 0.184 |
| MRPS6     | 1 | 0.87842841 | 5.85E-48  | 1.07E-43  | 0.961 | 0.905 |
| SLC3A2    | 1 | 0.87469511 | 5.47E-72  | 9.98E-68  | 0.667 | 0.243 |
| MIF       | 1 | 0.8181842  | 1.77E-134 | 3.24E-130 | 1     | 1     |
| SLC2A1    | 1 | 0.81816329 | 2.15E-82  | 3.92E-78  | 0.595 | 0.111 |
| PMP22     | 1 | 0.81777986 | 7.91E-84  | 1.44E-79  | 0.934 | 0.589 |
| ORM1      | 1 | 0.78746165 | 3.58E-28  | 6.54E-24  | 0.368 | 0.116 |
| CHI3L2    | 1 | 0.75711127 | 3.17E-32  | 5.79E-28  | 0.628 | 0.373 |
| CCDC85B   | 1 | 0.74844106 | 3.52E-58  | 6.42E-54  | 0.895 | 0.674 |
| BMP2      | 1 | 0.73077542 | 3.74E-69  | 6.82E-65  | 0.428 | 0.029 |
| NDRG1     | 1 | 0.72766202 | 4.00E-65  | 7.29E-61  | 0.721 | 0.297 |
| TMSB10    | 1 | 0.69979709 | 2.10E-58  | 3.84E-54  | 0.992 | 0.97  |
| TGFBI     | 1 | 0.69897578 | 8.34E-47  | 1.52E-42  | 0.556 | 0.216 |
| RGCC      | 1 | 0.69316489 | 1.30E-46  | 2.37E-42  | 0.95  | 0.78  |
| AK2       | 1 | 0.69003044 | 8.34E-56  | 1.52E-51  | 0.828 | 0.577 |
| DDIT3     | 1 | 0.68656259 | 3.94E-44  | 7.18E-40  | 0.659 | 0.354 |
| CD44      | 1 | 0.68576558 | 3.38E-73  | 6.16E-69  | 0.907 | 0.454 |
| ABI3BP    | 1 | 0.67883916 | 1.37E-29  | 2.50E-25  | 0.659 | 0.438 |
| RGS2      | 1 | 0.67880715 | 3.51E-33  | 6.40E-29  | 0.545 | 0.242 |
| VAPA      | 1 | 0.67005804 | 1.51E-77  | 2.76E-73  | 0.977 | 0.851 |
| PPP3CA    | 1 | 0.66871992 | 3.12E-46  | 5.70E-42  | 0.864 | 0.606 |
| PTP4A1    | 1 | 0.66698926 | 4.67E-55  | 8.52E-51  | 0.68  | 0.313 |
| DNER      | 1 | 0.66220454 | 9.06E-57  | 1.65E-52  | 0.694 | 0.306 |
| HLA-DRB1  | 1 | 0.65928042 | 8.00E-62  | 1.46E-57  | 0.541 | 0.131 |
| GBE1      | 1 | 0.659023   | 1.48E-52  | 2.70E-48  | 0.779 | 0.479 |

|          |   |            |           |           |       |       |
|----------|---|------------|-----------|-----------|-------|-------|
| ATP6V1G1 | 1 | 0.65900781 | 9.43E-70  | 1.72E-65  | 0.986 | 0.929 |
| RNF145   | 1 | 0.65536594 | 3.31E-47  | 6.04E-43  | 0.57  | 0.231 |
| TREM1    | 1 | 0.65164378 | 4.84E-72  | 8.83E-68  | 0.403 | 0.011 |
| SPRY2    | 1 | 0.64289157 | 2.27E-66  | 4.14E-62  | 0.452 | 0.051 |
| EIF1     | 1 | 0.62585092 | 9.12E-106 | 1.66E-101 | 1     | 1     |
| SNHG12   | 1 | 0.62200067 | 3.53E-58  | 6.43E-54  | 0.626 | 0.225 |
| PPP1R15A | 1 | 0.62171315 | 2.48E-54  | 4.52E-50  | 0.527 | 0.147 |
| ISG20    | 1 | 0.61564556 | 3.49E-49  | 6.38E-45  | 0.657 | 0.306 |
| IFRD1    | 1 | 0.61559694 | 1.38E-51  | 2.51E-47  | 0.705 | 0.364 |
| PGK1     | 1 | 0.60985295 | 2.38E-51  | 4.34E-47  | 0.963 | 0.842 |
| NRN1     | 1 | 0.60920266 | 1.14E-21  | 2.09E-17  | 0.541 | 0.303 |
| FOSL1    | 1 | 0.60820044 | 5.17E-54  | 9.43E-50  | 0.331 | 0.017 |
| SLC25A37 | 1 | 0.60236051 | 2.44E-56  | 4.45E-52  | 0.897 | 0.573 |
| RABGGTB  | 1 | 0.60009705 | 1.02E-60  | 1.85E-56  | 0.829 | 0.477 |
| GSTO1    | 1 | 0.59745065 | 1.11E-57  | 2.02E-53  | 0.857 | 0.533 |
| ZNF385D  | 1 | 0.59641997 | 4.26E-50  | 7.77E-46  | 0.764 | 0.433 |
| PHLDA1   | 1 | 0.59039308 | 4.19E-46  | 7.64E-42  | 0.331 | 0.036 |
| SGIP1    | 1 | 0.58543723 | 7.15E-60  | 1.30E-55  | 0.359 | 0.017 |
| ENO1     | 1 | 0.58532175 | 3.24E-42  | 5.91E-38  | 0.99  | 0.976 |
| ARPP19   | 1 | 0.57687312 | 5.42E-49  | 9.90E-45  | 0.715 | 0.418 |
| CCND1    | 1 | 0.57420271 | 6.86E-51  | 1.25E-46  | 0.477 | 0.113 |
| ENO2     | 1 | 0.57352623 | 2.10E-52  | 3.82E-48  | 0.628 | 0.253 |
| RNF114   | 1 | 0.57117516 | 8.23E-51  | 1.50E-46  | 0.734 | 0.426 |
| PPP1CB   | 1 | 0.56516792 | 4.68E-33  | 8.53E-29  | 0.853 | 0.649 |
| GPX1     | 1 | 0.55714092 | 6.84E-52  | 1.25E-47  | 0.95  | 0.716 |
| DNAJB9   | 1 | 0.55551346 | 3.33E-40  | 6.08E-36  | 0.785 | 0.505 |
| BAALC    | 1 | 0.55544739 | 2.93E-23  | 5.35E-19  | 0.554 | 0.339 |
| NBPF14   | 1 | 0.55499782 | 8.08E-65  | 1.47E-60  | 0.471 | 0.066 |
| EPS8     | 1 | 0.54637152 | 5.16E-54  | 9.42E-50  | 0.508 | 0.127 |
| PID1     | 1 | 0.54450236 | 7.17E-40  | 1.31E-35  | 0.678 | 0.394 |
| FAP      | 1 | 0.53741044 | 8.68E-51  | 1.58E-46  | 0.459 | 0.101 |
| TMEM45A  | 1 | 0.53638257 | 4.58E-34  | 8.36E-30  | 0.922 | 0.781 |
| PPFIBP1  | 1 | 0.53077951 | 5.76E-33  | 1.05E-28  | 0.589 | 0.331 |
| SERPINE1 | 1 | 0.52970813 | 4.91E-53  | 8.96E-49  | 0.341 | 0.024 |
| MED21    | 1 | 0.51881854 | 6.20E-35  | 1.13E-30  | 0.624 | 0.355 |
| EIF4EBP1 | 1 | 0.51210518 | 2.47E-26  | 4.51E-22  | 0.62  | 0.402 |
| RND3     | 1 | 0.51186774 | 6.13E-40  | 1.12E-35  | 0.312 | 0.041 |
| RELB     | 1 | 0.50969516 | 2.25E-59  | 4.11E-55  | 0.448 | 0.065 |
| WDR33    | 1 | 0.50316207 | 1.69E-41  | 3.09E-37  | 0.649 | 0.333 |

|            |   |            |          |          |       |       |
|------------|---|------------|----------|----------|-------|-------|
| EIF1B      | 1 | 0.50270801 | 8.17E-45 | 1.49E-40 | 0.828 | 0.567 |
| ARF6       | 1 | 0.50270632 | 1.47E-41 | 2.67E-37 | 0.676 | 0.375 |
| GOLT1B     | 1 | 0.50263657 | 2.03E-43 | 3.70E-39 | 0.597 | 0.268 |
| KLF3       | 1 | 0.50119031 | 2.44E-29 | 4.46E-25 | 0.444 | 0.183 |
| FAM162A    | 1 | 0.49859708 | 8.60E-40 | 1.57E-35 | 0.938 | 0.826 |
| TGM2       | 1 | 0.49615903 | 2.27E-45 | 4.15E-41 | 0.494 | 0.145 |
| CSGALNACT2 | 1 | 0.49321092 | 2.41E-39 | 4.39E-35 | 0.417 | 0.115 |
| SLC20A1    | 1 | 0.48805025 | 1.30E-43 | 2.36E-39 | 0.419 | 0.1   |
| PDE4B      | 1 | 0.48496246 | 3.22E-39 | 5.88E-35 | 0.403 | 0.1   |
| RGS16      | 1 | 0.48278674 | 2.33E-19 | 4.25E-15 | 0.382 | 0.177 |
| PLAUR      | 1 | 0.48270215 | 3.75E-36 | 6.84E-32 | 0.471 | 0.172 |
| SERPINE2   | 1 | 0.47999904 | 1.67E-11 | 3.04E-07 | 0.998 | 0.997 |
| ZNF593     | 1 | 0.47293145 | 5.49E-42 | 1.00E-37 | 0.632 | 0.308 |
| SQSTM1     | 1 | 0.47168354 | 2.58E-39 | 4.72E-35 | 0.967 | 0.913 |
| WDR45B     | 1 | 0.46827084 | 4.13E-37 | 7.54E-33 | 0.498 | 0.189 |
| WSB1       | 1 | 0.46435481 | 1.04E-30 | 1.90E-26 | 0.853 | 0.656 |
| XBP1       | 1 | 0.46200594 | 3.85E-28 | 7.03E-24 | 0.731 | 0.541 |
| MT1G       | 1 | 0.46077065 | 4.89E-09 | 8.92E-05 | 0.93  | 0.855 |
| CRLF1      | 1 | 0.46012915 | 5.55E-36 | 1.01E-31 | 0.453 | 0.149 |
| AIMP1      | 1 | 0.45702321 | 1.02E-32 | 1.85E-28 | 0.698 | 0.44  |
| ANXA1      | 1 | 0.45633061 | 9.42E-19 | 1.72E-14 | 0.822 | 0.715 |
| NTMT1      | 1 | 0.45133042 | 1.42E-35 | 2.59E-31 | 0.533 | 0.234 |
| NPR3       | 1 | 0.4434925  | 1.31E-55 | 2.38E-51 | 0.3   | 0     |
| SH3BP5     | 1 | 0.44348483 | 1.02E-28 | 1.86E-24 | 0.529 | 0.27  |
| TNFRSF11B  | 1 | 0.44168593 | 2.02E-11 | 3.68E-07 | 0.626 | 0.477 |
| CLK1       | 1 | 0.43470299 | 1.37E-34 | 2.51E-30 | 0.7   | 0.434 |
| ZFAND5     | 1 | 0.43303935 | 2.31E-24 | 4.22E-20 | 0.581 | 0.358 |
| VMP1       | 1 | 0.43233795 | 9.98E-17 | 1.82E-12 | 0.651 | 0.513 |
| PTGES3     | 1 | 0.43065247 | 2.69E-43 | 4.90E-39 | 0.983 | 0.925 |
| PLCG2      | 1 | 0.42862062 | 5.27E-43 | 9.61E-39 | 0.328 | 0.041 |
| TRMT112    | 1 | 0.4262311  | 4.31E-38 | 7.86E-34 | 0.946 | 0.842 |
| ADSS       | 1 | 0.42469428 | 2.54E-26 | 4.64E-22 | 0.61  | 0.375 |
| SYF2       | 1 | 0.42357899 | 1.58E-36 | 2.89E-32 | 0.913 | 0.784 |
| SLC25A36   | 1 | 0.42343161 | 1.15E-30 | 2.10E-26 | 0.653 | 0.383 |
| HMGA2      | 1 | 0.41957695 | 5.11E-62 | 9.33E-58 | 0.331 | 0     |
| ARF4       | 1 | 0.41748894 | 1.63E-26 | 2.97E-22 | 0.806 | 0.614 |
| LGALS3     | 1 | 0.41582511 | 2.75E-27 | 5.02E-23 | 0.965 | 0.935 |
| GRB10      | 1 | 0.41375601 | 5.29E-48 | 9.65E-44 | 0.287 | 0.01  |
| BTG3       | 1 | 0.41141043 | 4.37E-32 | 7.98E-28 | 0.479 | 0.192 |

|           |   |            |          |            |       |       |
|-----------|---|------------|----------|------------|-------|-------|
| GDF15     | 1 | 0.40711355 | 4.08E-29 | 7.45E-25   | 0.192 | 0.011 |
| SAR1A     | 1 | 0.40594003 | 3.22E-28 | 5.88E-24   | 0.645 | 0.416 |
| EMP3      | 1 | 0.40570168 | 8.21E-29 | 1.50E-24   | 0.93  | 0.855 |
| CHD2      | 1 | 0.4047927  | 7.54E-21 | 1.38E-16   | 0.413 | 0.199 |
| CTTN      | 1 | 0.40474374 | 1.19E-22 | 2.17E-18   | 0.517 | 0.293 |
| EIF5      | 1 | 0.40174748 | 1.27E-26 | 2.31E-22   | 0.727 | 0.52  |
| TMEM38B   | 1 | 0.40081586 | 6.43E-31 | 1.17E-26   | 0.609 | 0.326 |
| COX17     | 1 | 0.39781241 | 9.40E-26 | 1.71E-21   | 0.804 | 0.624 |
| BTG1      | 1 | 0.39580863 | 1.26E-22 | 2.30E-18   | 0.965 | 0.909 |
| PLA2G2A   | 1 | 0.39574879 | 1.60E-08 | 0.00029204 | 0.388 | 0.245 |
| CCT8      | 1 | 0.39543363 | 2.53E-29 | 4.62E-25   | 0.756 | 0.528 |
| C11orf31  | 1 | 0.39529896 | 4.45E-30 | 8.12E-26   | 0.835 | 0.622 |
| CTNNB1    | 1 | 0.39435031 | 7.22E-15 | 1.32E-10   | 0.442 | 0.259 |
| NOL7      | 1 | 0.39380603 | 1.15E-26 | 2.10E-22   | 0.719 | 0.51  |
| SLC5A3    | 1 | 0.39100091 | 9.99E-12 | 1.82E-07   | 0.525 | 0.379 |
| RHOC      | 1 | 0.39057105 | 5.80E-23 | 1.06E-18   | 0.872 | 0.744 |
| COX7A2    | 1 | 0.38923521 | 1.03E-46 | 1.88E-42   | 0.988 | 0.961 |
| AEBP1     | 1 | 0.3878492  | 2.71E-19 | 4.95E-15   | 0.628 | 0.415 |
| CTHRC1    | 1 | 0.38769095 | 1.54E-31 | 2.81E-27   | 0.298 | 0.058 |
| PFDN2     | 1 | 0.38355817 | 3.54E-30 | 6.45E-26   | 0.7   | 0.477 |
| GPRC5A    | 1 | 0.38208606 | 3.56E-37 | 6.49E-33   | 0.37  | 0.084 |
| DNAJB1    | 1 | 0.37981317 | 3.71E-15 | 6.77E-11   | 0.333 | 0.16  |
| ESD       | 1 | 0.37764241 | 3.92E-15 | 7.15E-11   | 0.829 | 0.732 |
| EIF4A2    | 1 | 0.37727844 | 8.04E-44 | 1.47E-39   | 1     | 0.996 |
| ADM       | 1 | 0.37635483 | 4.48E-09 | 8.18E-05   | 0.783 | 0.685 |
| VIMP      | 1 | 0.3742625  | 7.89E-26 | 1.44E-21   | 0.818 | 0.577 |
| ERRFI1    | 1 | 0.37406335 | 8.07E-14 | 1.47E-09   | 0.349 | 0.185 |
| MSANTD3   | 1 | 0.36600062 | 1.82E-35 | 3.33E-31   | 0.36  | 0.083 |
| VDAC1     | 1 | 0.36533478 | 1.43E-26 | 2.62E-22   | 0.891 | 0.734 |
| KMT2E-AS1 | 1 | 0.36434854 | 8.14E-31 | 1.49E-26   | 0.289 | 0.055 |
| IER3      | 1 | 0.36434702 | 4.35E-13 | 7.94E-09   | 0.275 | 0.123 |
| RNF126    | 1 | 0.3639707  | 1.57E-28 | 2.87E-24   | 0.422 | 0.163 |
| ANXA5     | 1 | 0.36304692 | 4.21E-25 | 7.68E-21   | 0.926 | 0.765 |
| RNMT      | 1 | 0.36303041 | 9.68E-21 | 1.77E-16   | 0.554 | 0.329 |
| TFPI      | 1 | 0.36164703 | 1.46E-24 | 2.67E-20   | 0.262 | 0.059 |
| LINC00152 | 1 | 0.36101046 | 1.33E-19 | 2.42E-15   | 0.417 | 0.202 |
| METAP2    | 1 | 0.35748118 | 1.43E-26 | 2.60E-22   | 0.849 | 0.665 |
| BNIP3     | 1 | 0.35419554 | 7.12E-28 | 1.30E-23   | 0.998 | 0.99  |
| ATF4      | 1 | 0.34915094 | 2.82E-28 | 5.14E-24   | 0.961 | 0.849 |

|            |   |            |          |            |       |       |
|------------|---|------------|----------|------------|-------|-------|
| S100A16    | 1 | 0.34913691 | 5.61E-15 | 1.02E-10   | 0.405 | 0.231 |
| SVIP       | 1 | 0.34765549 | 2.81E-20 | 5.12E-16   | 0.556 | 0.343 |
| LINC00493  | 1 | 0.34335885 | 1.96E-28 | 3.57E-24   | 0.93  | 0.777 |
| CA9        | 1 | 0.3424865  | 1.93E-16 | 3.52E-12   | 0.428 | 0.238 |
| ORM2       | 1 | 0.34245047 | 7.28E-13 | 1.33E-08   | 0.176 | 0.053 |
| TVP23B     | 1 | 0.34051617 | 1.15E-19 | 2.10E-15   | 0.453 | 0.238 |
| PPP1R14C   | 1 | 0.33863668 | 2.22E-44 | 4.05E-40   | 0.32  | 0.032 |
| PPDPF      | 1 | 0.33836784 | 8.47E-41 | 1.55E-36   | 1     | 1     |
| RIPK2      | 1 | 0.33730246 | 2.48E-33 | 4.53E-29   | 0.333 | 0.073 |
| CAPZA2     | 1 | 0.33531109 | 1.77E-22 | 3.23E-18   | 0.783 | 0.618 |
| CCDC174    | 1 | 0.33500624 | 8.17E-28 | 1.49E-23   | 0.45  | 0.183 |
| NT5E       | 1 | 0.33189411 | 1.00E-17 | 1.82E-13   | 0.424 | 0.221 |
| ATP6V0E1   | 1 | 0.33101465 | 1.77E-24 | 3.24E-20   | 0.915 | 0.811 |
| EVI2A      | 1 | 0.33077928 | 2.88E-38 | 5.25E-34   | 0.333 | 0.055 |
| GADD45GIP1 | 1 | 0.33072938 | 8.93E-22 | 1.63E-17   | 0.829 | 0.697 |
| NAMPT      | 1 | 0.3307142  | 2.11E-19 | 3.85E-15   | 0.547 | 0.336 |
| CLIC4      | 1 | 0.33050961 | 7.84E-18 | 1.43E-13   | 0.523 | 0.329 |
| MAP1LC3B   | 1 | 0.33008872 | 2.15E-19 | 3.92E-15   | 0.601 | 0.389 |
| CNIH1      | 1 | 0.32787732 | 4.46E-22 | 8.13E-18   | 0.818 | 0.642 |
| IGFBP5     | 1 | 0.32651745 | 4.04E-12 | 7.37E-08   | 0.203 | 0.075 |
| TNS1       | 1 | 0.32572676 | 2.81E-28 | 5.12E-24   | 0.312 | 0.077 |
| CHMP5      | 1 | 0.32218882 | 4.29E-21 | 7.83E-17   | 0.665 | 0.474 |
| OSER1      | 1 | 0.31782132 | 1.13E-19 | 2.06E-15   | 0.459 | 0.249 |
| CLDN12     | 1 | 0.31599988 | 5.23E-21 | 9.54E-17   | 0.384 | 0.167 |
| ABL2       | 1 | 0.31445882 | 3.96E-28 | 7.23E-24   | 0.335 | 0.093 |
| PFKP       | 1 | 0.31265853 | 3.78E-16 | 6.89E-12   | 0.502 | 0.317 |
| RAB1A      | 1 | 0.31144167 | 1.30E-17 | 2.38E-13   | 0.791 | 0.625 |
| FNIP2      | 1 | 0.3111727  | 2.72E-15 | 4.96E-11   | 0.324 | 0.151 |
| AC090498.1 | 1 | 0.31089863 | 1.41E-51 | 2.58E-47   | 1     | 1     |
| CDC37L1    | 1 | 0.31041356 | 3.02E-18 | 5.51E-14   | 0.49  | 0.282 |
| TMSB4X     | 1 | 0.30889879 | 1.08E-08 | 0.00019781 | 0.8   | 0.687 |
| NDUFB8     | 1 | 0.30803207 | 2.14E-17 | 3.91E-13   | 0.816 | 0.73  |
| CLDND1     | 1 | 0.30757628 | 1.09E-19 | 1.99E-15   | 0.483 | 0.261 |
| LINC-PINT  | 1 | 0.30684325 | 1.92E-21 | 3.50E-17   | 0.302 | 0.1   |
| CHMP4B     | 1 | 0.30591833 | 1.51E-18 | 2.76E-14   | 0.688 | 0.528 |
| SH3BGRL3   | 1 | 0.30514535 | 1.82E-22 | 3.33E-18   | 0.984 | 0.974 |
| SNRNP27    | 1 | 0.30510652 | 1.51E-16 | 2.76E-12   | 0.506 | 0.311 |
| FERMT2     | 1 | 0.30373136 | 1.45E-18 | 2.65E-14   | 0.467 | 0.257 |
| C16orf13   | 1 | 0.30344049 | 1.39E-20 | 2.53E-16   | 0.862 | 0.687 |

|              |   |            |          |            |       |       |
|--------------|---|------------|----------|------------|-------|-------|
| SEC61G       | 1 | 0.30318955 | 5.92E-21 | 1.08E-16   | 0.998 | 0.996 |
| SERPINA1     | 1 | 0.30182436 | 4.08E-07 | 0.00743597 | 0.961 | 0.975 |
| PAIP2        | 1 | 0.2991784  | 1.22E-18 | 2.23E-14   | 0.793 | 0.663 |
| EPB41L4A-AS1 | 1 | 0.29720424 | 8.60E-20 | 1.57E-15   | 0.932 | 0.822 |
| MTHFD2       | 1 | 0.29493606 | 1.86E-12 | 3.39E-08   | 0.643 | 0.488 |
| C7orf50      | 1 | 0.29358415 | 1.96E-15 | 3.58E-11   | 0.632 | 0.469 |
| ZFYVE16      | 1 | 0.29244005 | 9.79E-29 | 1.79E-24   | 0.302 | 0.069 |
| FAM210A      | 1 | 0.29212975 | 1.16E-21 | 2.11E-17   | 0.426 | 0.195 |
| POLR1D       | 1 | 0.29066671 | 1.96E-17 | 3.58E-13   | 0.793 | 0.682 |
| UBL3         | 1 | 0.29043352 | 9.28E-12 | 1.69E-07   | 0.523 | 0.376 |
| SELK         | 1 | 0.28833242 | 6.99E-16 | 1.28E-11   | 0.88  | 0.748 |
| UBE2B        | 1 | 0.28754691 | 4.53E-19 | 8.27E-15   | 0.82  | 0.675 |
| HILPDA       | 1 | 0.28742237 | 8.90E-15 | 1.62E-10   | 0.585 | 0.385 |
| SMS          | 1 | 0.28711892 | 1.55E-10 | 2.84E-06   | 0.564 | 0.461 |
| SAP18        | 1 | 0.28664004 | 7.99E-18 | 1.46E-13   | 0.907 | 0.804 |
| C2orf49      | 1 | 0.28631334 | 2.74E-21 | 4.99E-17   | 0.401 | 0.176 |
| CRTAC1       | 1 | 0.28620577 | 1.35E-17 | 2.46E-13   | 0.275 | 0.097 |
| ZFAND2A      | 1 | 0.28421556 | 6.00E-28 | 1.10E-23   | 0.326 | 0.084 |
| PELI1        | 1 | 0.2820979  | 3.36E-20 | 6.13E-16   | 0.262 | 0.076 |
| RHOD         | 1 | 0.28176173 | 1.23E-14 | 2.24E-10   | 0.473 | 0.289 |
| ACTB         | 1 | 0.27928469 | 2.22E-14 | 4.05E-10   | 0.967 | 0.917 |
| KITLG        | 1 | 0.27857717 | 8.77E-27 | 1.60E-22   | 0.306 | 0.076 |
| PLA2G4A      | 1 | 0.27750881 | 1.19E-19 | 2.17E-15   | 0.329 | 0.124 |
| MRPL54       | 1 | 0.27606908 | 3.22E-15 | 5.88E-11   | 0.514 | 0.328 |
| NDUFC1       | 1 | 0.27522783 | 6.90E-18 | 1.26E-13   | 0.934 | 0.823 |
| PDLIM4       | 1 | 0.27401472 | 2.16E-12 | 3.95E-08   | 0.901 | 0.813 |
| LOX          | 1 | 0.27399018 | 3.67E-17 | 6.69E-13   | 0.279 | 0.101 |
| SLC7A2       | 1 | 0.27383288 | 2.74E-27 | 5.00E-23   | 0.217 | 0.026 |
| KAT5         | 1 | 0.27355539 | 5.96E-20 | 1.09E-15   | 0.362 | 0.149 |
| AKAP12       | 1 | 0.27346544 | 8.48E-22 | 1.55E-17   | 0.225 | 0.047 |
| UBE2I        | 1 | 0.272374   | 9.26E-17 | 1.69E-12   | 0.723 | 0.538 |
| HNRNPDL      | 1 | 0.27192707 | 5.41E-16 | 9.87E-12   | 0.851 | 0.711 |
| RPF2         | 1 | 0.26947986 | 1.53E-17 | 2.80E-13   | 0.436 | 0.23  |
| COPS2        | 1 | 0.26876252 | 3.58E-13 | 6.54E-09   | 0.674 | 0.549 |
| AKIRIN2      | 1 | 0.26720616 | 1.27E-18 | 2.31E-14   | 0.351 | 0.148 |
| SH3GLB1      | 1 | 0.26689882 | 3.74E-14 | 6.83E-10   | 0.684 | 0.544 |
| YAF2         | 1 | 0.26671355 | 2.52E-20 | 4.60E-16   | 0.372 | 0.154 |
| IL11         | 1 | 0.26563856 | 1.91E-26 | 3.49E-22   | 0.147 | 0     |
| SREK1IP1     | 1 | 0.26485332 | 3.57E-14 | 6.52E-10   | 0.461 | 0.284 |



|            |   |            |          |           |       |       |
|------------|---|------------|----------|-----------|-------|-------|
| CCDC59     | 1 | 0.26483615 | 5.88E-14 | 1.07E-09  | 0.506 | 0.328 |
| TYMP       | 1 | 0.26463127 | 6.42E-16 | 1.17E-11  | 0.333 | 0.148 |
| TRAM1      | 1 | 0.2631105  | 2.84E-15 | 5.18E-11  | 0.845 | 0.732 |
| DDX41      | 1 | 0.26309963 | 7.91E-14 | 1.44E-09  | 0.273 | 0.118 |
| MAR5       | 1 | 0.262598   | 2.08E-15 | 3.80E-11  | 0.409 | 0.227 |
| PTBP3      | 1 | 0.26242879 | 5.16E-23 | 9.41E-19  | 0.318 | 0.1   |
| TMOD1      | 1 | 0.26218183 | 5.04E-26 | 9.19E-22  | 0.25  | 0.047 |
| CAMK2D     | 1 | 0.26167386 | 4.64E-23 | 8.46E-19  | 0.335 | 0.113 |
| KLHL21     | 1 | 0.26144911 | 1.09E-23 | 1.99E-19  | 0.31  | 0.093 |
| TBCA       | 1 | 0.26122015 | 1.78E-19 | 3.25E-15  | 0.973 | 0.916 |
| SCAND1     | 1 | 0.26099426 | 2.40E-12 | 4.37E-08  | 0.618 | 0.491 |
| SEMA3A     | 1 | 0.26023545 | 2.12E-31 | 3.87E-27  | 0.264 | 0.037 |
| TIMM10B    | 1 | 0.26007111 | 4.88E-16 | 8.90E-12  | 0.393 | 0.202 |
| DEFB1      | 1 | 0.25968297 | 7.87E-13 | 1.44E-08  | 0.211 | 0.076 |
| COX6B1     | 1 | 0.25929682 | 9.15E-21 | 1.67E-16  | 0.979 | 0.946 |
| SUN1       | 1 | 0.25850276 | 3.08E-17 | 5.61E-13  | 0.38  | 0.18  |
| GAPDH      | 1 | 0.25726687 | 2.81E-12 | 5.13E-08  | 1     | 1     |
| ACTR10     | 1 | 0.25692094 | 9.79E-13 | 1.79E-08  | 0.455 | 0.286 |
| ABHD2      | 1 | 0.25517699 | 3.88E-25 | 7.08E-21  | 0.252 | 0.051 |
| TRA2B      | 1 | 0.25311694 | 1.44E-11 | 2.62E-07  | 0.484 | 0.331 |
| USMG5      | 1 | 0.25298052 | 3.75E-19 | 6.84E-15  | 0.961 | 0.892 |
| GRPEL1     | 1 | 0.25241712 | 9.04E-15 | 1.65E-10  | 0.39  | 0.207 |
| FGFR1OP2   | 1 | 0.25218887 | 4.15E-13 | 7.57E-09  | 0.486 | 0.318 |
| CGGBP1     | 1 | 0.2515071  | 2.09E-12 | 3.81E-08  | 0.508 | 0.355 |
| C4orf48    | 1 | 0.25029108 | 7.98E-12 | 1.46E-07  | 0.391 | 0.224 |
| HSPA5      | 1 | 0.2501393  | 6.87E-07 | 0.0125435 | 0.516 | 0.412 |
| ATP2B1     | 1 | -0.2508693 | 1.93E-18 | 3.51E-14  | 0.109 | 0.315 |
| MRC2       | 1 | -0.2510658 | 3.10E-23 | 5.66E-19  | 0.093 | 0.336 |
| HIST1H2AC  | 1 | -0.2510761 | 6.15E-20 | 1.12E-15  | 0.078 | 0.286 |
| GABPB1-AS1 | 1 | -0.2512582 | 1.87E-19 | 3.42E-15  | 0.097 | 0.31  |
| OTOS       | 1 | -0.2516719 | 5.37E-19 | 9.81E-15  | 0.079 | 0.279 |
| CHD9       | 1 | -0.2525664 | 1.44E-15 | 2.63E-11  | 0.252 | 0.474 |
| CDC42EP5   | 1 | -0.2526914 | 3.50E-15 | 6.39E-11  | 0.291 | 0.495 |
| CALM3      | 1 | -0.2535208 | 1.00E-14 | 1.83E-10  | 0.533 | 0.716 |
| PPP1CA     | 1 | -0.2538231 | 2.70E-21 | 4.93E-17  | 0.141 | 0.38  |
| SLC26A2    | 1 | -0.2539003 | 8.44E-23 | 1.54E-18  | 0.062 | 0.284 |
| SOD1       | 1 | -0.2541929 | 1.49E-17 | 2.71E-13  | 0.928 | 0.974 |
| IDH2       | 1 | -0.254591  | 1.00E-22 | 1.83E-18  | 0.045 | 0.253 |
| NUCB1      | 1 | -0.2547486 | 1.38E-11 | 2.52E-07  | 0.496 | 0.642 |

|           |   |            |          |          |       |       |
|-----------|---|------------|----------|----------|-------|-------|
| ATP6AP1   | 1 | -0.2550793 | 8.02E-21 | 1.46E-16 | 0.116 | 0.343 |
| LSM2      | 1 | -0.2557293 | 4.33E-14 | 7.91E-10 | 0.397 | 0.589 |
| SSR1      | 1 | -0.2562026 | 6.34E-15 | 1.16E-10 | 0.357 | 0.563 |
| HOXA9     | 1 | -0.2562503 | 5.62E-26 | 1.03E-21 | 0.041 | 0.271 |
| KTN1      | 1 | -0.2580287 | 1.26E-14 | 2.30E-10 | 0.49  | 0.672 |
| RPL15     | 1 | -0.2586706 | 8.31E-69 | 1.52E-64 | 1     | 1     |
| ZFHX4     | 1 | -0.2587573 | 2.31E-29 | 4.21E-25 | 0.035 | 0.284 |
| RPS29     | 1 | -0.2589569 | 1.98E-49 | 3.62E-45 | 1     | 1     |
| H1F0      | 1 | -0.2591548 | 1.18E-14 | 2.16E-10 | 0.209 | 0.42  |
| PPP1CC    | 1 | -0.2602365 | 2.38E-16 | 4.35E-12 | 0.428 | 0.638 |
| ARL2      | 1 | -0.2609399 | 1.99E-18 | 3.64E-14 | 0.314 | 0.564 |
| PRKCDBP   | 1 | -0.2612918 | 3.01E-14 | 5.50E-10 | 0.304 | 0.499 |
| LAGE3     | 1 | -0.2613427 | 5.44E-17 | 9.93E-13 | 0.366 | 0.602 |
| SEC63     | 1 | -0.2622643 | 1.23E-18 | 2.24E-14 | 0.285 | 0.537 |
| ZCRB1     | 1 | -0.26381   | 1.97E-17 | 3.60E-13 | 0.331 | 0.574 |
| FGFBP2    | 1 | -0.2646005 | 2.70E-09 | 4.93E-05 | 0.988 | 0.996 |
| SLC38A1   | 1 | -0.2649124 | 1.11E-19 | 2.02E-15 | 0.14  | 0.367 |
| CBR1      | 1 | -0.2650775 | 9.63E-23 | 1.76E-18 | 0.114 | 0.357 |
| CHMP3     | 1 | -0.2654778 | 4.54E-14 | 8.28E-10 | 0.38  | 0.564 |
| KRT8      | 1 | -0.2656101 | 1.29E-14 | 2.35E-10 | 0.233 | 0.433 |
| PRKCSH    | 1 | -0.2668497 | 2.00E-17 | 3.65E-13 | 0.308 | 0.541 |
| GSTP1     | 1 | -0.267147  | 4.62E-21 | 8.43E-17 | 0.946 | 0.985 |
| EIF3J-AS1 | 1 | -0.2675915 | 2.68E-22 | 4.89E-18 | 0.124 | 0.367 |
| RPS3      | 1 | -0.2679802 | 1.43E-60 | 2.60E-56 | 1     | 1     |
| PCOLCE    | 1 | -0.2680842 | 1.13E-16 | 2.05E-12 | 0.14  | 0.342 |
| ST13      | 1 | -0.2685603 | 3.67E-22 | 6.69E-18 | 0.917 | 0.972 |
| RPS4Y1    | 1 | -0.2689159 | 7.71E-30 | 1.41E-25 | 0.994 | 0.997 |
| RCN3      | 1 | -0.269077  | 2.52E-15 | 4.60E-11 | 0.295 | 0.512 |
| C19orf43  | 1 | -0.2691673 | 1.35E-19 | 2.46E-15 | 0.736 | 0.9   |
| CRELD2    | 1 | -0.26933   | 1.82E-25 | 3.32E-21 | 0.056 | 0.293 |
| CYB5D2    | 1 | -0.2696235 | 8.17E-25 | 1.49E-20 | 0.099 | 0.353 |
| CA11      | 1 | -0.2698104 | 3.36E-25 | 6.13E-21 | 0.074 | 0.318 |
| TNFRSF1A  | 1 | -0.2698929 | 4.64E-15 | 8.46E-11 | 0.264 | 0.465 |
| MLEC      | 1 | -0.2700341 | 7.29E-16 | 1.33E-11 | 0.264 | 0.469 |
| TMED9     | 1 | -0.2700547 | 4.12E-14 | 7.52E-10 | 0.51  | 0.69  |
| RBM3      | 1 | -0.2700687 | 5.98E-16 | 1.09E-11 | 0.388 | 0.603 |
| RPS18     | 1 | -0.2704696 | 2.80E-59 | 5.12E-55 | 1     | 1     |
| PODNL1    | 1 | -0.2705801 | 1.97E-16 | 3.60E-12 | 0.182 | 0.387 |
| RPS23     | 1 | -0.2708948 | 8.37E-55 | 1.53E-50 | 1     | 1     |

|         |   |            |          |           |       |       |
|---------|---|------------|----------|-----------|-------|-------|
| TCEA2   | 1 | -0.2709067 | 1.09E-19 | 1.99E-15  | 0.229 | 0.47  |
| IFITM2  | 1 | -0.2717412 | 8.96E-14 | 1.63E-09  | 0.816 | 0.882 |
| HNRNPM  | 1 | -0.2717616 | 2.98E-18 | 5.44E-14  | 0.205 | 0.436 |
| HDHC2   | 1 | -0.2721457 | 3.77E-16 | 6.88E-12  | 0.399 | 0.614 |
| COPZ2   | 1 | -0.2722405 | 2.31E-25 | 4.21E-21  | 0.105 | 0.369 |
| NXPH4   | 1 | -0.2725706 | 2.00E-13 | 3.65E-09  | 0.155 | 0.328 |
| BTF3    | 1 | -0.2730204 | 3.87E-30 | 7.06E-26  | 0.994 | 0.999 |
| SLC29A1 | 1 | -0.2734311 | 7.01E-20 | 1.28E-15  | 0.203 | 0.444 |
| C9orf3  | 1 | -0.27365   | 1.48E-21 | 2.70E-17  | 0.202 | 0.462 |
| P4HA1   | 1 | -0.2743253 | 2.37E-14 | 4.33E-10  | 0.562 | 0.723 |
| RPS4X   | 1 | -0.2749549 | 8.22E-64 | 1.50E-59  | 1     | 1     |
| PIGT    | 1 | -0.2751768 | 1.49E-21 | 2.71E-17  | 0.138 | 0.379 |
| CFH     | 1 | -0.2762816 | 7.52E-09 | 0.0001372 | 0.118 | 0.243 |
| SUMO1   | 1 | -0.2767794 | 3.20E-18 | 5.85E-14  | 0.531 | 0.743 |
| ERLEC1  | 1 | -0.27815   | 3.79E-17 | 6.91E-13  | 0.281 | 0.505 |
| HOXC10  | 1 | -0.2781561 | 3.92E-14 | 7.16E-10  | 0.556 | 0.712 |
| CKAP4   | 1 | -0.2783003 | 1.13E-23 | 2.06E-19  | 0.112 | 0.362 |
| CD302   | 1 | -0.2789525 | 2.61E-22 | 4.76E-18  | 0.112 | 0.35  |
| LAMTOR1 | 1 | -0.2789823 | 1.55E-18 | 2.83E-14  | 0.382 | 0.615 |
| NQO2    | 1 | -0.2793995 | 8.50E-19 | 1.55E-14  | 0.227 | 0.456 |
| DMKN    | 1 | -0.279403  | 9.40E-19 | 1.72E-14  | 0.264 | 0.502 |
| PRDX1   | 1 | -0.2812339 | 9.75E-15 | 1.78E-10  | 0.733 | 0.844 |
| C1orf21 | 1 | -0.2820151 | 3.38E-16 | 6.17E-12  | 0.39  | 0.603 |
| B3GNT7  | 1 | -0.2820617 | 4.83E-11 | 8.81E-07  | 0.236 | 0.409 |
| RPL6    | 1 | -0.2822166 | 1.91E-48 | 3.48E-44  | 1     | 1     |
| SLC1A5  | 1 | -0.2831021 | 1.32E-26 | 2.41E-22  | 0.079 | 0.337 |
| CCDC8   | 1 | -0.2833142 | 3.22E-29 | 5.88E-25  | 0.033 | 0.279 |
| RCN2    | 1 | -0.2844631 | 3.41E-16 | 6.22E-12  | 0.486 | 0.687 |
| RPL5    | 1 | -0.2850325 | 4.45E-47 | 8.13E-43  | 1     | 1     |
| NEDD8   | 1 | -0.2863507 | 1.37E-17 | 2.50E-13  | 0.531 | 0.736 |
| HERPUD1 | 1 | -0.2872233 | 1.50E-17 | 2.74E-13  | 0.324 | 0.559 |
| TRAPPC1 | 1 | -0.2877913 | 6.51E-20 | 1.19E-15  | 0.24  | 0.487 |
| SMIM14  | 1 | -0.2879069 | 5.87E-24 | 1.07E-19  | 0.14  | 0.404 |
| NMRK1   | 1 | -0.2883669 | 1.29E-20 | 2.35E-16  | 0.196 | 0.436 |
| RPL7A   | 1 | -0.2900418 | 3.19E-59 | 5.82E-55  | 1     | 1     |
| RPL14   | 1 | -0.2908612 | 1.33E-58 | 2.42E-54  | 1     | 1     |
| HSPA8   | 1 | -0.2911205 | 1.95E-15 | 3.57E-11  | 0.271 | 0.479 |
| SUMO2   | 1 | -0.2914747 | 4.29E-30 | 7.82E-26  | 0.965 | 0.989 |
| C14orf1 | 1 | -0.2915306 | 5.31E-24 | 9.70E-20  | 0.126 | 0.382 |

|             |   |            |          |          |       |       |
|-------------|---|------------|----------|----------|-------|-------|
| ANKRD35     | 1 | -0.2916665 | 6.61E-27 | 1.21E-22 | 0.074 | 0.326 |
| MKX         | 1 | -0.2922317 | 3.03E-25 | 5.53E-21 | 0.099 | 0.355 |
| SRSF9       | 1 | -0.2928318 | 2.64E-20 | 4.82E-16 | 0.341 | 0.599 |
| RPL13       | 1 | -0.2929626 | 7.75E-78 | 1.41E-73 | 1     | 1     |
| SERTAD4-AS1 | 1 | -0.2935859 | 1.71E-28 | 3.12E-24 | 0.068 | 0.331 |
| HOXB6       | 1 | -0.2937644 | 8.04E-20 | 1.47E-15 | 0.188 | 0.419 |
| SEP1        | 1 | -0.2938628 | 6.46E-22 | 1.18E-17 | 0.132 | 0.375 |
| FKBP10      | 1 | -0.2938639 | 1.49E-14 | 2.71E-10 | 0.37  | 0.562 |
| NENF        | 1 | -0.2943171 | 1.94E-24 | 3.53E-20 | 0.882 | 0.972 |
| IFITM1      | 1 | -0.2949122 | 4.07E-12 | 7.43E-08 | 0.324 | 0.506 |
| ATP5D       | 1 | -0.2955372 | 1.04E-22 | 1.90E-18 | 0.775 | 0.921 |
| C12orf57    | 1 | -0.297096  | 2.11E-28 | 3.85E-24 | 0.94  | 0.986 |
| ATP5A1      | 1 | -0.2972764 | 8.71E-19 | 1.59E-14 | 0.411 | 0.632 |
| TOMM7       | 1 | -0.297789  | 4.18E-58 | 7.63E-54 | 1     | 1     |
| MAGEF1      | 1 | -0.2978441 | 1.08E-30 | 1.97E-26 | 0.078 | 0.36  |
| LY6E        | 1 | -0.2991549 | 1.26E-15 | 2.29E-11 | 0.32  | 0.519 |
| CYBRD1      | 1 | -0.2994411 | 1.46E-19 | 2.66E-15 | 0.44  | 0.669 |
| RPS5        | 1 | -0.3003754 | 3.19E-61 | 5.81E-57 | 1     | 1     |
| MXRA8       | 1 | -0.3012781 | 3.42E-22 | 6.24E-18 | 0.149 | 0.398 |
| RPS13       | 1 | -0.3016685 | 1.67E-60 | 3.05E-56 | 1     | 1     |
| FHL1        | 1 | -0.3029719 | 6.05E-16 | 1.10E-11 | 0.324 | 0.537 |
| FXDYD1      | 1 | -0.3036098 | 9.82E-10 | 1.79E-05 | 0.293 | 0.423 |
| FIS1        | 1 | -0.303733  | 6.89E-20 | 1.26E-15 | 0.517 | 0.725 |
| S100A1      | 1 | -0.3038477 | 6.89E-30 | 1.26E-25 | 1     | 1     |
| MEG3        | 1 | -0.304037  | 1.75E-21 | 3.19E-17 | 0.136 | 0.379 |
| RPS6        | 1 | -0.3043146 | 1.64E-80 | 2.99E-76 | 1     | 1     |
| CTSA        | 1 | -0.3049314 | 1.40E-29 | 2.56E-25 | 0.066 | 0.335 |
| S100A13     | 1 | -0.3050318 | 1.34E-38 | 2.44E-34 | 0.998 | 1     |
| TPD52L1     | 1 | -0.3054249 | 6.90E-15 | 1.26E-10 | 0.341 | 0.542 |
| CCDC14      | 1 | -0.3054585 | 4.46E-26 | 8.14E-22 | 0.11  | 0.372 |
| RARRES3     | 1 | -0.3061213 | 1.77E-31 | 3.23E-27 | 0.031 | 0.292 |
| GPAA1       | 1 | -0.3066066 | 5.72E-25 | 1.04E-20 | 0.159 | 0.427 |
| TCEB2       | 1 | -0.3066078 | 1.58E-31 | 2.89E-27 | 0.948 | 0.989 |
| HSPB1       | 1 | -0.3066509 | 5.91E-19 | 1.08E-14 | 0.578 | 0.79  |
| PAM         | 1 | -0.3071976 | 4.06E-20 | 7.40E-16 | 0.403 | 0.643 |
| ERP29       | 1 | -0.3074299 | 9.90E-22 | 1.81E-17 | 0.641 | 0.794 |
| AFF3        | 1 | -0.3080541 | 6.88E-36 | 1.26E-31 | 0.017 | 0.293 |
| PCOLCE2     | 1 | -0.3089047 | 5.23E-18 | 9.54E-14 | 0.907 | 0.956 |
| ABHD14B     | 1 | -0.3090294 | 7.33E-24 | 1.34E-19 | 0.186 | 0.459 |

|              |   |            |          |          |       |       |
|--------------|---|------------|----------|----------|-------|-------|
| LITAF        | 1 | -0.3098671 | 4.40E-17 | 8.04E-13 | 0.374 | 0.573 |
| SUMF2        | 1 | -0.3100873 | 3.99E-20 | 7.28E-16 | 0.324 | 0.567 |
| AHNAK        | 1 | -0.3106145 | 4.85E-22 | 8.84E-18 | 0.267 | 0.527 |
| SARAF        | 1 | -0.310804  | 1.79E-21 | 3.26E-17 | 0.51  | 0.728 |
| HMGB1        | 1 | -0.311466  | 1.92E-21 | 3.50E-17 | 0.669 | 0.841 |
| PDIA4        | 1 | -0.3121131 | 4.91E-23 | 8.95E-19 | 0.184 | 0.445 |
| GLTSCR2      | 1 | -0.3121463 | 3.78E-26 | 6.89E-22 | 0.853 | 0.947 |
| LUC7L3       | 1 | -0.3123596 | 3.70E-22 | 6.76E-18 | 0.269 | 0.534 |
| BEX4         | 1 | -0.3123726 | 3.41E-20 | 6.21E-16 | 0.413 | 0.65  |
| UMAD1        | 1 | -0.3127311 | 9.15E-22 | 1.67E-17 | 0.184 | 0.433 |
| PDGFRA       | 1 | -0.3136753 | 1.42E-26 | 2.59E-22 | 0.068 | 0.317 |
| NKX3-2       | 1 | -0.3136929 | 1.21E-31 | 2.21E-27 | 0.027 | 0.285 |
| RNASET2      | 1 | -0.3139579 | 3.25E-24 | 5.93E-20 | 0.207 | 0.481 |
| RPL10        | 1 | -0.3140978 | 4.18E-86 | 7.63E-82 | 1     | 1     |
| GSTA4        | 1 | -0.3148587 | 3.79E-25 | 6.91E-21 | 0.184 | 0.458 |
| SGCB         | 1 | -0.3151887 | 1.91E-16 | 3.48E-12 | 0.316 | 0.533 |
| FAM200B      | 1 | -0.3163075 | 7.86E-26 | 1.43E-21 | 0.176 | 0.459 |
| RPL8         | 1 | -0.3165075 | 8.56E-77 | 1.56E-72 | 1     | 1     |
| OS9          | 1 | -0.3169398 | 7.17E-19 | 1.31E-14 | 0.347 | 0.578 |
| PPIA         | 1 | -0.3187903 | 2.65E-30 | 4.83E-26 | 0.946 | 0.986 |
| RP11-71N10.1 | 1 | -0.3189115 | 1.27E-35 | 2.32E-31 | 0.014 | 0.285 |
| EFNA1        | 1 | -0.3208353 | 6.31E-23 | 1.15E-18 | 0.196 | 0.463 |
| NDRG2        | 1 | -0.3214245 | 3.21E-36 | 5.85E-32 | 0.029 | 0.317 |
| ITM2B        | 1 | -0.322382  | 4.95E-22 | 9.03E-18 | 0.971 | 0.993 |
| DDOST        | 1 | -0.3228477 | 1.02E-20 | 1.87E-16 | 0.297 | 0.548 |
| RPS2         | 1 | -0.3234187 | 3.03E-72 | 5.53E-68 | 1     | 1     |
| INSIG1       | 1 | -0.324096  | 9.66E-15 | 1.76E-10 | 0.271 | 0.469 |
| RPL9         | 1 | -0.3242587 | 2.73E-79 | 4.98E-75 | 1     | 1     |
| NME4         | 1 | -0.3243815 | 6.97E-25 | 1.27E-20 | 0.242 | 0.52  |
| CCDC88A      | 1 | -0.325437  | 4.38E-24 | 7.99E-20 | 0.147 | 0.401 |
| NDUFA3       | 1 | -0.3260296 | 1.52E-25 | 2.78E-21 | 0.359 | 0.66  |
| RPL19        | 1 | -0.3285649 | 5.56E-90 | 1.01E-85 | 1     | 1     |
| DYNLT1       | 1 | -0.3292945 | 3.86E-27 | 7.04E-23 | 0.238 | 0.541 |
| TCEA3        | 1 | -0.329384  | 2.63E-27 | 4.79E-23 | 0.211 | 0.505 |
| CRIP2        | 1 | -0.3299812 | 5.21E-20 | 9.50E-16 | 0.266 | 0.503 |
| SPTLC3       | 1 | -0.3302242 | 8.32E-18 | 1.52E-13 | 0.107 | 0.308 |
| SLC25A3      | 1 | -0.3305424 | 4.29E-30 | 7.83E-26 | 0.868 | 0.956 |
| TCEAL8       | 1 | -0.3314708 | 3.52E-24 | 6.42E-20 | 0.574 | 0.794 |
| JTB          | 1 | -0.3318804 | 7.19E-24 | 1.31E-19 | 0.574 | 0.802 |

|               |   |            |          |            |       |       |
|---------------|---|------------|----------|------------|-------|-------|
| CAMTA1        | 1 | -0.3325632 | 1.30E-23 | 2.38E-19   | 0.506 | 0.728 |
| PLA2G16       | 1 | -0.3333195 | 9.83E-24 | 1.79E-19   | 0.217 | 0.48  |
| ZIC1          | 1 | -0.3336026 | 4.07E-22 | 7.43E-18   | 0.126 | 0.364 |
| RPL30         | 1 | -0.3337826 | 7.93E-71 | 1.45E-66   | 1     | 1     |
| RP11-553L6.5  | 1 | -0.3337882 | 1.28E-32 | 2.34E-28   | 0.085 | 0.387 |
| COMMD6        | 1 | -0.3357894 | 1.88E-45 | 3.43E-41   | 0.994 | 1     |
| EBPL          | 1 | -0.3359207 | 4.64E-27 | 8.47E-23   | 0.221 | 0.512 |
| H1FX          | 1 | -0.3370185 | 7.54E-28 | 1.38E-23   | 0.079 | 0.342 |
| TMED3         | 1 | -0.3373501 | 6.70E-21 | 1.22E-16   | 0.328 | 0.571 |
| RPL13A        | 1 | -0.3375754 | 4.02E-98 | 7.34E-94   | 1     | 1     |
| NDUFA11       | 1 | -0.3377213 | 2.14E-29 | 3.91E-25   | 0.808 | 0.952 |
| RP11-983P16.4 | 1 | -0.3377979 | 8.12E-25 | 1.48E-20   | 0.203 | 0.472 |
| HSP90AB1      | 1 | -0.3396375 | 1.37E-33 | 2.50E-29   | 0.963 | 0.992 |
| ANGPTL5       | 1 | -0.3406802 | 1.99E-28 | 3.63E-24   | 0.128 | 0.412 |
| RPS27A        | 1 | -0.343528  | 2.44E-89 | 4.45E-85   | 1     | 1     |
| LMAN2         | 1 | -0.3438685 | 1.27E-25 | 2.31E-21   | 0.283 | 0.573 |
| PTPRD-AS1     | 1 | -0.3441851 | 3.79E-26 | 6.91E-22   | 0.19  | 0.472 |
| NFIC          | 1 | -0.344754  | 1.67E-24 | 3.06E-20   | 0.246 | 0.515 |
| PIM3          | 1 | -0.3450192 | 6.14E-21 | 1.12E-16   | 0.304 | 0.546 |
| DUT           | 1 | -0.3450767 | 3.21E-22 | 5.85E-18   | 0.471 | 0.694 |
| CREG1         | 1 | -0.3462293 | 5.14E-26 | 9.38E-22   | 0.413 | 0.687 |
| GADD45B       | 1 | -0.3466512 | 2.39E-21 | 4.36E-17   | 0.112 | 0.344 |
| DDIT4         | 1 | -0.3474059 | 9.72E-19 | 1.77E-14   | 0.32  | 0.555 |
| ETFB          | 1 | -0.3487776 | 5.16E-31 | 9.41E-27   | 0.287 | 0.613 |
| PLD3          | 1 | -0.3495356 | 4.50E-23 | 8.21E-19   | 0.36  | 0.618 |
| UQCRH         | 1 | -0.3512981 | 3.76E-37 | 6.87E-33   | 0.921 | 0.981 |
| SEPP1         | 1 | -0.3520323 | 2.20E-27 | 4.01E-23   | 0.205 | 0.502 |
| RPS7          | 1 | -0.3527158 | 7.37E-68 | 1.34E-63   | 1     | 1     |
| ARL6IP4       | 1 | -0.3531143 | 1.11E-34 | 2.02E-30   | 0.795 | 0.942 |
| ENAH          | 1 | -0.3532326 | 3.15E-33 | 5.75E-29   | 0.089 | 0.396 |
| MPP6          | 1 | -0.3533077 | 3.19E-33 | 5.82E-29   | 0.12  | 0.434 |
| MYEOV2        | 1 | -0.3537892 | 6.85E-26 | 1.25E-21   | 0.517 | 0.761 |
| MSMP          | 1 | -0.3539633 | 1.14E-08 | 0.00020726 | 0.244 | 0.4   |
| LDHB          | 1 | -0.3550758 | 5.28E-29 | 9.64E-25   | 0.715 | 0.884 |
| HOXB8         | 1 | -0.3558447 | 9.79E-41 | 1.79E-36   | 0.023 | 0.333 |
| AC005152.3    | 1 | -0.3558447 | 3.60E-32 | 6.57E-28   | 0.048 | 0.322 |
| OAF           | 1 | -0.3567534 | 6.14E-34 | 1.12E-29   | 0.052 | 0.343 |
| CHAD          | 1 | -0.3567702 | 9.35E-35 | 1.71E-30   | 0.041 | 0.328 |
| CNPY2         | 1 | -0.3575137 | 8.28E-26 | 1.51E-21   | 0.444 | 0.703 |

|          |   |            |          |          |       |       |
|----------|---|------------|----------|----------|-------|-------|
| PRDX5    | 1 | -0.3584625 | 9.06E-34 | 1.65E-29 | 0.837 | 0.946 |
| SOCS3    | 1 | -0.3585584 | 4.08E-31 | 7.45E-27 | 0.064 | 0.339 |
| COL6A2   | 1 | -0.3593526 | 4.23E-18 | 7.71E-14 | 0.498 | 0.683 |
| EIF2S3   | 1 | -0.3600629 | 1.29E-23 | 2.35E-19 | 0.37  | 0.64  |
| PGAM1    | 1 | -0.3616132 | 8.15E-31 | 1.49E-26 | 0.649 | 0.876 |
| PSAP     | 1 | -0.3632309 | 1.44E-26 | 2.63E-22 | 0.853 | 0.963 |
| RPLP2    | 1 | -0.3640597 | 2.46E-92 | 4.48E-88 | 1     | 1     |
| MYLK     | 1 | -0.3645178 | 4.68E-30 | 8.53E-26 | 0.078 | 0.357 |
| RPL18    | 1 | -0.3657693 | 1.30E-77 | 2.37E-73 | 1     | 1     |
| COL5A2   | 1 | -0.3657798 | 3.33E-22 | 6.09E-18 | 0.18  | 0.43  |
| CD8B     | 1 | -0.3658676 | 2.13E-37 | 3.89E-33 | 0.056 | 0.367 |
| TSPAN4   | 1 | -0.3660109 | 2.19E-28 | 4.00E-24 | 0.285 | 0.591 |
| RPL23    | 1 | -0.3670071 | 3.18E-62 | 5.81E-58 | 1     | 1     |
| CANX     | 1 | -0.3707603 | 1.81E-25 | 3.30E-21 | 0.583 | 0.801 |
| MTDH     | 1 | -0.3709965 | 4.18E-24 | 7.63E-20 | 0.465 | 0.701 |
| TMEM219  | 1 | -0.3712011 | 5.18E-30 | 9.46E-26 | 0.508 | 0.761 |
| RPS17    | 1 | -0.3725528 | 1.07E-76 | 1.96E-72 | 1     | 1     |
| PNKD     | 1 | -0.3732798 | 8.77E-37 | 1.60E-32 | 0.14  | 0.476 |
| SRSF5    | 1 | -0.3740521 | 6.61E-27 | 1.21E-22 | 0.444 | 0.712 |
| ABHD14A  | 1 | -0.3741619 | 8.09E-38 | 1.48E-33 | 0.085 | 0.416 |
| PDE4DIP  | 1 | -0.3752489 | 8.01E-31 | 1.46E-26 | 0.264 | 0.567 |
| CUTA     | 1 | -0.3780303 | 1.15E-33 | 2.10E-29 | 0.721 | 0.911 |
| PRCP     | 1 | -0.3797927 | 1.68E-40 | 3.07E-36 | 0.076 | 0.414 |
| TPM2     | 1 | -0.381041  | 8.39E-29 | 1.53E-24 | 0.411 | 0.686 |
| POLR2L   | 1 | -0.3816002 | 4.44E-25 | 8.10E-21 | 0.758 | 0.869 |
| PRUNE2   | 1 | -0.3841093 | 5.60E-34 | 1.02E-29 | 0.12  | 0.438 |
| VKORC1   | 1 | -0.3855109 | 1.06E-31 | 1.93E-27 | 0.934 | 0.989 |
| RPS16    | 1 | -0.3858657 | 6.50E-88 | 1.19E-83 | 1     | 1     |
| CD63     | 1 | -0.3862937 | 2.44E-34 | 4.45E-30 | 1     | 1     |
| CD320    | 1 | -0.3864119 | 2.56E-31 | 4.68E-27 | 0.314 | 0.631 |
| ARL2BP   | 1 | -0.389353  | 2.05E-27 | 3.75E-23 | 0.343 | 0.617 |
| PPIB     | 1 | -0.3895215 | 1.14E-29 | 2.08E-25 | 0.859 | 0.96  |
| HIST1H1C | 1 | -0.3900105 | 1.13E-10 | 2.07E-06 | 0.302 | 0.467 |
| TMEM230  | 1 | -0.3907959 | 1.29E-29 | 2.35E-25 | 0.527 | 0.766 |
| CMPK1    | 1 | -0.3922455 | 5.59E-29 | 1.02E-24 | 0.607 | 0.797 |
| RABAC1   | 1 | -0.3926845 | 8.10E-35 | 1.48E-30 | 0.736 | 0.927 |
| SERF2    | 1 | -0.3931668 | 5.92E-44 | 1.08E-39 | 1     | 1     |
| TUBB     | 1 | -0.3939965 | 1.21E-32 | 2.20E-28 | 0.696 | 0.906 |
| PNRC1    | 1 | -0.3953319 | 5.46E-41 | 9.96E-37 | 0.868 | 0.986 |

|               |   |            |           |           |       |       |
|---------------|---|------------|-----------|-----------|-------|-------|
| NAP1L1        | 1 | -0.3955018 | 8.17E-41  | 1.49E-36  | 0.926 | 0.978 |
| TMEM98        | 1 | -0.3983688 | 3.64E-40  | 6.64E-36  | 0.11  | 0.465 |
| RPL23A        | 1 | -0.3989243 | 8.42E-109 | 1.54E-104 | 1     | 1     |
| IER2          | 1 | -0.4040281 | 1.42E-30  | 2.58E-26  | 0.14  | 0.443 |
| MORF4L2       | 1 | -0.4044218 | 7.13E-33  | 1.30E-28  | 0.444 | 0.746 |
| TXNIP         | 1 | -0.4049059 | 1.87E-47  | 3.40E-43  | 0.021 | 0.369 |
| ATPIF1        | 1 | -0.4054337 | 7.48E-34  | 1.37E-29  | 0.564 | 0.799 |
| ACTG1         | 1 | -0.4054645 | 2.85E-29  | 5.19E-25  | 0.94  | 0.988 |
| HLA-C         | 1 | -0.4115436 | 4.41E-28  | 8.04E-24  | 0.884 | 0.957 |
| NINJ1         | 1 | -0.4123569 | 2.55E-30  | 4.66E-26  | 0.426 | 0.715 |
| RPL3          | 1 | -0.4125059 | 4.12E-100 | 7.52E-96  | 1     | 1     |
| ARL6IP5       | 1 | -0.4126716 | 2.04E-34  | 3.73E-30  | 0.378 | 0.707 |
| COL9A2        | 1 | -0.4147275 | 2.69E-27  | 4.91E-23  | 0.229 | 0.513 |
| ARPC1A        | 1 | -0.4152955 | 6.96E-38  | 1.27E-33  | 0.267 | 0.617 |
| MYL6          | 1 | -0.4159986 | 4.52E-43  | 8.24E-39  | 0.864 | 0.978 |
| SSR4          | 1 | -0.4186211 | 3.14E-42  | 5.72E-38  | 0.971 | 0.992 |
| EEF1B2        | 1 | -0.4188828 | 1.69E-56  | 3.08E-52  | 0.983 | 0.999 |
| KDELR3        | 1 | -0.4191347 | 6.24E-40  | 1.14E-35  | 0.06  | 0.387 |
| ILF3-AS1      | 1 | -0.420436  | 2.10E-39  | 3.84E-35  | 0.13  | 0.476 |
| PNISR         | 1 | -0.4215458 | 7.96E-36  | 1.45E-31  | 0.51  | 0.793 |
| PLXDC2        | 1 | -0.4231179 | 4.48E-33  | 8.17E-29  | 0.331 | 0.653 |
| HLA-A         | 1 | -0.426029  | 2.84E-29  | 5.18E-25  | 0.86  | 0.968 |
| CHRD12        | 1 | -0.4268702 | 4.37E-30  | 7.98E-26  | 0.064 | 0.332 |
| CCDC102B      | 1 | -0.4273692 | 1.32E-50  | 2.40E-46  | 0.017 | 0.382 |
| RPS3A         | 1 | -0.4277178 | 3.15E-117 | 5.75E-113 | 1     | 1     |
| RPL34         | 1 | -0.4281204 | 2.12E-116 | 3.87E-112 | 1     | 1     |
| DBP           | 1 | -0.4333286 | 2.98E-33  | 5.43E-29  | 0.143 | 0.451 |
| IGFBP7        | 1 | -0.4334092 | 1.09E-23  | 1.98E-19  | 0.82  | 0.945 |
| PKM           | 1 | -0.4335537 | 8.83E-34  | 1.61E-29  | 0.874 | 0.974 |
| PPP1R3C       | 1 | -0.4359953 | 9.39E-27  | 1.71E-22  | 0.269 | 0.544 |
| HEXB          | 1 | -0.4363875 | 2.09E-33  | 3.81E-29  | 0.341 | 0.656 |
| ASPN          | 1 | -0.4381254 | 5.28E-15  | 9.64E-11  | 0.072 | 0.242 |
| C7orf73       | 1 | -0.4393037 | 1.64E-39  | 2.99E-35  | 0.504 | 0.835 |
| SH3BGRL       | 1 | -0.4394377 | 5.90E-37  | 1.08E-32  | 0.335 | 0.661 |
| RP5-1097P24.1 | 1 | -0.4394681 | 8.16E-41  | 1.49E-36  | 0.109 | 0.458 |
| SSR2          | 1 | -0.4425254 | 3.14E-41  | 5.73E-37  | 0.729 | 0.923 |
| AC003090.1    | 1 | -0.4452452 | 3.87E-53  | 7.06E-49  | 0.037 | 0.43  |
| LRPAP1        | 1 | -0.4458463 | 7.71E-32  | 1.41E-27  | 0.366 | 0.676 |
| KDELR2        | 1 | -0.4462288 | 5.08E-42  | 9.27E-38  | 0.713 | 0.925 |



|              |   |            |           |           |       |       |
|--------------|---|------------|-----------|-----------|-------|-------|
| BSG          | 1 | -0.452837  | 1.02E-36  | 1.86E-32  | 0.547 | 0.812 |
| SEC11A       | 1 | -0.453401  | 9.12E-54  | 1.66E-49  | 0.773 | 0.96  |
| CTSK         | 1 | -0.4544186 | 2.70E-48  | 4.93E-44  | 0.112 | 0.508 |
| CTSD         | 1 | -0.4569717 | 5.94E-38  | 1.08E-33  | 0.767 | 0.95  |
| ATRNL1       | 1 | -0.45852   | 7.33E-41  | 1.34E-36  | 0.103 | 0.45  |
| SPINT2       | 1 | -0.4598344 | 4.65E-35  | 8.48E-31  | 0.287 | 0.615 |
| PLPP1        | 1 | -0.4615708 | 1.41E-39  | 2.56E-35  | 0.056 | 0.378 |
| HSP90B1      | 1 | -0.462315  | 8.92E-31  | 1.63E-26  | 0.725 | 0.898 |
| TSPO         | 1 | -0.4625495 | 2.69E-44  | 4.91E-40  | 0.661 | 0.92  |
| PRELP        | 1 | -0.4639212 | 1.57E-36  | 2.87E-32  | 0.948 | 0.997 |
| CMB9-22P13.1 | 1 | -0.4641554 | 1.26E-37  | 2.29E-33  | 0.215 | 0.557 |
| EIF4B        | 1 | -0.4652223 | 2.98E-42  | 5.44E-38  | 0.692 | 0.909 |
| NUCB2        | 1 | -0.4652667 | 1.54E-35  | 2.81E-31  | 0.318 | 0.651 |
| HMG3         | 1 | -0.4665567 | 2.08E-50  | 3.80E-46  | 0.136 | 0.555 |
| ZBTB20       | 1 | -0.4667177 | 8.33E-49  | 1.52E-44  | 0.132 | 0.534 |
| SLC44A1      | 1 | -0.4668986 | 7.48E-41  | 1.36E-36  | 0.151 | 0.51  |
| PCBP2        | 1 | -0.469896  | 3.06E-53  | 5.59E-49  | 0.831 | 0.965 |
| RNF130       | 1 | -0.4701364 | 8.45E-38  | 1.54E-33  | 0.382 | 0.689 |
| BHLHE41      | 1 | -0.4714133 | 9.04E-40  | 1.65E-35  | 0.178 | 0.545 |
| SOD3         | 1 | -0.4725208 | 7.64E-25  | 1.39E-20  | 0.903 | 0.979 |
| MT-ND5       | 1 | -0.4746374 | 3.07E-27  | 5.61E-23  | 0.397 | 0.66  |
| TMED10       | 1 | -0.4767343 | 7.47E-43  | 1.36E-38  | 0.82  | 0.952 |
| ERGIC3       | 1 | -0.483092  | 8.39E-49  | 1.53E-44  | 0.734 | 0.905 |
| GSN          | 1 | -0.485531  | 4.36E-36  | 7.96E-32  | 0.364 | 0.676 |
| SDC2         | 1 | -0.4857198 | 8.40E-47  | 1.53E-42  | 0.703 | 0.938 |
| VIM          | 1 | -0.487177  | 2.35E-56  | 4.30E-52  | 0.996 | 1     |
| PRDX4        | 1 | -0.4889399 | 2.43E-39  | 4.43E-35  | 0.709 | 0.906 |
| RPL7         | 1 | -0.491871  | 1.01E-105 | 1.85E-101 | 1     | 1     |
| AP2M1        | 1 | -0.4931141 | 1.10E-44  | 2.02E-40  | 0.328 | 0.692 |
| TSPAN3       | 1 | -0.493885  | 1.12E-43  | 2.05E-39  | 0.318 | 0.672 |
| HTRA1        | 1 | -0.5004953 | 9.76E-49  | 1.78E-44  | 0.665 | 0.938 |
| COL11A2      | 1 | -0.5018136 | 1.45E-39  | 2.64E-35  | 0.36  | 0.701 |
| HDLBP        | 1 | -0.502075  | 1.30E-43  | 2.36E-39  | 0.233 | 0.602 |
| CXXC5        | 1 | -0.5023267 | 8.14E-52  | 1.48E-47  | 0.074 | 0.473 |
| RPN2         | 1 | -0.5028906 | 5.23E-52  | 9.55E-48  | 0.083 | 0.485 |
| CALR         | 1 | -0.5042819 | 4.22E-34  | 7.71E-30  | 0.502 | 0.769 |
| ENPP1        | 1 | -0.5054257 | 2.72E-51  | 4.96E-47  | 0.062 | 0.458 |
| DNM3OS       | 1 | -0.5089994 | 1.63E-46  | 2.97E-42  | 0.095 | 0.47  |
| FMOD         | 1 | -0.5110795 | 8.04E-53  | 1.47E-48  | 0.88  | 0.99  |

|          |   |            |           |           |       |       |
|----------|---|------------|-----------|-----------|-------|-------|
| BRK1     | 1 | -0.5113454 | 2.56E-60  | 4.68E-56  | 0.678 | 0.945 |
| CHID1    | 1 | -0.511793  | 1.15E-44  | 2.10E-40  | 0.374 | 0.712 |
| MOXD1    | 1 | -0.5118858 | 4.75E-43  | 8.68E-39  | 0.153 | 0.516 |
| HMG2N    | 1 | -0.5121143 | 2.96E-56  | 5.39E-52  | 0.828 | 0.961 |
| BAMBI    | 1 | -0.5129237 | 1.54E-23  | 2.82E-19  | 0.428 | 0.676 |
| SPON2    | 1 | -0.5156737 | 2.17E-38  | 3.96E-34  | 0.083 | 0.412 |
| ATRAID   | 1 | -0.5232247 | 6.44E-48  | 1.17E-43  | 0.707 | 0.931 |
| INHBA    | 1 | -0.5241581 | 3.07E-41  | 5.61E-37  | 0.126 | 0.49  |
| DCN      | 1 | -0.5267742 | 2.17E-62  | 3.96E-58  | 1     | 1     |
| TRPS1    | 1 | -0.5304784 | 1.38E-51  | 2.52E-47  | 0.172 | 0.593 |
| NFIA     | 1 | -0.531002  | 1.59E-58  | 2.91E-54  | 0.089 | 0.53  |
| SDF4     | 1 | -0.5323012 | 3.69E-50  | 6.73E-46  | 0.463 | 0.801 |
| ITM2A    | 1 | -0.533347  | 5.15E-42  | 9.40E-38  | 0.465 | 0.804 |
| CCNG1    | 1 | -0.5363186 | 1.82E-57  | 3.31E-53  | 0.182 | 0.627 |
| TMED2    | 1 | -0.5383159 | 4.74E-53  | 8.65E-49  | 0.576 | 0.884 |
| RPL10A   | 1 | -0.5388076 | 3.91E-117 | 7.13E-113 | 1     | 1     |
| MALAT1   | 1 | -0.5401304 | 1.17E-47  | 2.13E-43  | 1     | 1     |
| YBX1     | 1 | -0.5466886 | 1.22E-83  | 2.22E-79  | 0.953 | 0.997 |
| PPT1     | 1 | -0.5500938 | 3.14E-55  | 5.73E-51  | 0.184 | 0.614 |
| GNAS     | 1 | -0.5514462 | 1.98E-48  | 3.62E-44  | 0.442 | 0.758 |
| CST3     | 1 | -0.5538385 | 1.34E-66  | 2.44E-62  | 0.99  | 1     |
| TPT1     | 1 | -0.5541043 | 5.97E-126 | 1.09E-121 | 1     | 1     |
| MIA      | 1 | -0.5567925 | 1.02E-61  | 1.86E-57  | 0.988 | 1     |
| VCAN     | 1 | -0.563933  | 1.52E-35  | 2.78E-31  | 0.231 | 0.556 |
| FCGRT    | 1 | -0.5650491 | 1.19E-53  | 2.17E-49  | 0.434 | 0.779 |
| FAM46A   | 1 | -0.5691337 | 1.20E-34  | 2.18E-30  | 0.391 | 0.689 |
| DUSP1    | 1 | -0.5691386 | 1.34E-42  | 2.45E-38  | 0.269 | 0.631 |
| FTL      | 1 | -0.57481   | 4.95E-108 | 9.03E-104 | 1     | 1     |
| CTGF     | 1 | -0.576231  | 6.69E-21  | 1.22E-16  | 0.223 | 0.473 |
| GRN      | 1 | -0.5772715 | 7.43E-64  | 1.36E-59  | 0.105 | 0.573 |
| S100A4   | 1 | -0.577966  | 3.42E-25  | 6.25E-21  | 0.671 | 0.849 |
| SSPN     | 1 | -0.5807199 | 4.29E-60  | 7.83E-56  | 0.099 | 0.545 |
| NNMT     | 1 | -0.5823933 | 1.59E-43  | 2.89E-39  | 0.851 | 0.965 |
| GOLIM4   | 1 | -0.5824706 | 3.65E-33  | 6.65E-29  | 0.215 | 0.535 |
| EIF3L    | 1 | -0.5845938 | 1.73E-68  | 3.16E-64  | 0.725 | 0.954 |
| RBP4     | 1 | -0.5875638 | 4.00E-50  | 7.31E-46  | 0.655 | 0.927 |
| HIST1H4C | 1 | -0.5886769 | 2.96E-51  | 5.41E-47  | 0.246 | 0.663 |
| SSR3     | 1 | -0.5911096 | 8.34E-62  | 1.52E-57  | 0.789 | 0.952 |
| RPS8     | 1 | -0.5915358 | 1.44E-143 | 2.62E-139 | 1     | 1     |

|          |   |            |           |           |       |       |
|----------|---|------------|-----------|-----------|-------|-------|
| FOS      | 1 | -0.592746  | 4.10E-54  | 7.49E-50  | 0.372 | 0.78  |
| PTRF     | 1 | -0.5969537 | 5.45E-58  | 9.94E-54  | 0.234 | 0.665 |
| DDR2     | 1 | -0.6067559 | 5.05E-54  | 9.22E-50  | 0.262 | 0.657 |
| PTMS     | 1 | -0.609033  | 5.11E-65  | 9.32E-61  | 0.384 | 0.817 |
| RPLP0    | 1 | -0.6096365 | 2.02E-136 | 3.69E-132 | 1     | 1     |
| MAGED1   | 1 | -0.6157156 | 1.65E-39  | 3.02E-35  | 0.056 | 0.378 |
| PEBP1    | 1 | -0.6184639 | 1.93E-72  | 3.53E-68  | 0.638 | 0.932 |
| SERPINA5 | 1 | -0.6205771 | 1.07E-53  | 1.95E-49  | 0.417 | 0.772 |
| YBX3     | 1 | -0.6208559 | 1.37E-66  | 2.50E-62  | 0.636 | 0.945 |
| JUNB     | 1 | -0.623276  | 1.04E-56  | 1.90E-52  | 0.331 | 0.797 |
| ARHGAP29 | 1 | -0.6267197 | 3.03E-52  | 5.53E-48  | 0.225 | 0.635 |
| PPIC     | 1 | -0.6283074 | 1.93E-58  | 3.51E-54  | 0.223 | 0.674 |
| RPS20    | 1 | -0.6284855 | 3.77E-129 | 6.88E-125 | 1     | 1     |
| ID4      | 1 | -0.6463677 | 2.18E-53  | 3.99E-49  | 0.221 | 0.64  |
| COL11A1  | 1 | -0.6465449 | 5.19E-63  | 9.46E-59  | 0.496 | 0.899 |
| TTC3     | 1 | -0.6491146 | 6.32E-68  | 1.15E-63  | 0.415 | 0.833 |
| HNRNPA1  | 1 | -0.6498419 | 2.16E-97  | 3.93E-93  | 0.973 | 1     |
| PDIA3    | 1 | -0.6577465 | 2.36E-59  | 4.31E-55  | 0.362 | 0.755 |
| CTSC     | 1 | -0.6604874 | 3.57E-38  | 6.52E-34  | 0.074 | 0.396 |
| PABPC1   | 1 | -0.6613887 | 1.42E-80  | 2.60E-76  | 0.694 | 0.963 |
| CYR61    | 1 | -0.6631298 | 2.25E-48  | 4.11E-44  | 0.141 | 0.544 |
| MDFI     | 1 | -0.6652726 | 5.27E-63  | 9.61E-59  | 0.2   | 0.671 |
| CITED2   | 1 | -0.6668413 | 9.53E-54  | 1.74E-49  | 0.215 | 0.628 |
| RPS11    | 1 | -0.6682852 | 4.09E-126 | 7.47E-122 | 0.99  | 1     |
| CEBPD    | 1 | -0.682039  | 9.84E-51  | 1.80E-46  | 0.638 | 0.916 |
| RPL4     | 1 | -0.6825729 | 5.38E-126 | 9.81E-122 | 0.998 | 1     |
| GAS6     | 1 | -0.6921987 | 2.47E-69  | 4.51E-65  | 0.134 | 0.622 |
| NPC2     | 1 | -0.6929718 | 1.18E-109 | 2.15E-105 | 0.936 | 1     |
| MT-ND4   | 1 | -0.7004949 | 8.14E-55  | 1.48E-50  | 0.915 | 0.953 |
| FBXO2    | 1 | -0.716477  | 6.03E-79  | 1.10E-74  | 0.541 | 0.924 |
| THY1     | 1 | -0.7175529 | 1.75E-61  | 3.19E-57  | 0.18  | 0.631 |
| H3F3A    | 1 | -0.7176209 | 1.60E-103 | 2.93E-99  | 0.882 | 0.996 |
| SNAI2    | 1 | -0.7226601 | 4.27E-57  | 7.79E-53  | 0.207 | 0.645 |
| EID1     | 1 | -0.7303049 | 1.93E-104 | 3.53E-100 | 0.767 | 0.992 |
| XAGE2    | 1 | -0.7322098 | 3.77E-29  | 6.87E-25  | 0.01  | 0.234 |
| SLC14A1  | 1 | -0.7363293 | 5.20E-77  | 9.49E-73  | 0.147 | 0.66  |
| CCNI     | 1 | -0.7377713 | 7.33E-121 | 1.34E-116 | 0.988 | 0.999 |
| S100B    | 1 | -0.7388868 | 2.44E-72  | 4.46E-68  | 0.634 | 0.939 |
| CD9      | 1 | -0.740901  | 1.58E-64  | 2.87E-60  | 0.264 | 0.712 |

|          |   |            |           |           |       |       |
|----------|---|------------|-----------|-----------|-------|-------|
| ID2      | 1 | -0.7424591 | 6.99E-52  | 1.27E-47  | 0.24  | 0.642 |
| C2orf40  | 1 | -0.7480685 | 2.51E-62  | 4.58E-58  | 0.986 | 0.999 |
| CRTAP    | 1 | -0.7567227 | 5.58E-94  | 1.02E-89  | 0.453 | 0.888 |
| IGFBP6   | 1 | -0.7620427 | 3.53E-51  | 6.44E-47  | 0.541 | 0.842 |
| FXVD6    | 1 | -0.8035126 | 1.30E-102 | 2.38E-98  | 0.554 | 0.97  |
| NGFRAP1  | 1 | -0.8069821 | 1.68E-106 | 3.07E-102 | 0.694 | 0.979 |
| GPX3     | 1 | -0.8081826 | 1.82E-87  | 3.31E-83  | 0.857 | 0.999 |
| EEF2     | 1 | -0.8188934 | 2.45E-102 | 4.48E-98  | 0.973 | 0.999 |
| EIF3H    | 1 | -0.8189114 | 2.39E-133 | 4.36E-129 | 0.95  | 1     |
| APOD     | 1 | -0.8267272 | 2.58E-45  | 4.71E-41  | 0.262 | 0.64  |
| LECT1    | 1 | -0.8388456 | 4.75E-72  | 8.67E-68  | 0.736 | 0.978 |
| COL9A3   | 1 | -0.848247  | 1.07E-58  | 1.95E-54  | 0.455 | 0.833 |
| EEF1A1   | 1 | -0.850051  | 2.71E-177 | 4.94E-173 | 1     | 1     |
| TCF4     | 1 | -0.8517759 | 7.02E-92  | 1.28E-87  | 0.12  | 0.7   |
| NEAT1    | 1 | -0.8577943 | 1.68E-107 | 3.07E-103 | 0.986 | 1     |
| RHOBTB3  | 1 | -0.8674965 | 1.75E-90  | 3.20E-86  | 0.264 | 0.794 |
| FTH1     | 1 | -0.8774478 | 3.15E-137 | 5.75E-133 | 1     | 1     |
| CD99     | 1 | -0.8916233 | 1.50E-131 | 2.74E-127 | 0.839 | 0.996 |
| SLC40A1  | 1 | -0.9186777 | 1.62E-91  | 2.95E-87  | 0.029 | 0.599 |
| C2orf82  | 1 | -0.9257884 | 1.73E-89  | 3.15E-85  | 0.973 | 0.999 |
| MGP      | 1 | -0.933233  | 3.21E-83  | 5.85E-79  | 0.994 | 1     |
| PDIA6    | 1 | -0.935711  | 1.54E-107 | 2.81E-103 | 0.38  | 0.9   |
| B2M      | 1 | -0.939543  | 2.06E-134 | 3.76E-130 | 0.977 | 0.999 |
| ACAN     | 1 | -0.9407962 | 3.06E-115 | 5.59E-111 | 0.847 | 0.994 |
| CP       | 1 | -0.9786229 | 3.20E-98  | 5.83E-94  | 0.359 | 0.882 |
| CRISPLD1 | 1 | -0.9815285 | 2.30E-79  | 4.21E-75  | 0.017 | 0.528 |
| ADIRF    | 1 | -0.9873936 | 2.28E-83  | 4.17E-79  | 0.324 | 0.833 |
| MT-CO3   | 1 | -1.0058752 | 1.42E-89  | 2.59E-85  | 0.781 | 0.938 |
| P4HB     | 1 | -1.0137568 | 1.93E-115 | 3.53E-111 | 0.62  | 0.978 |
| MT-CO1   | 1 | -1.0168855 | 1.12E-79  | 2.04E-75  | 0.895 | 0.963 |
| SPARC    | 1 | -1.0260532 | 3.63E-98  | 6.62E-94  | 0.289 | 0.871 |
| ID1      | 1 | -1.0503243 | 1.06E-67  | 1.93E-63  | 0.211 | 0.696 |
| MT-ND3   | 1 | -1.0544475 | 5.77E-103 | 1.05E-98  | 0.331 | 0.873 |
| ITM2C    | 1 | -1.0613243 | 2.43E-116 | 4.43E-112 | 0.234 | 0.84  |
| MT-ND1   | 1 | -1.0825146 | 1.80E-102 | 3.28E-98  | 0.242 | 0.827 |
| ZFP36L2  | 1 | -1.0831364 | 1.02E-87  | 1.85E-83  | 0.081 | 0.643 |
| ISLR     | 1 | -1.1118651 | 2.57E-128 | 4.69E-124 | 0.13  | 0.816 |
| MT-CYB   | 1 | -1.1406553 | 1.59E-101 | 2.91E-97  | 0.372 | 0.88  |
| SLPI     | 1 | -1.1508486 | 5.63E-42  | 1.03E-37  | 0.891 | 0.996 |

| MT-CO2    | 1       | -1.1579549 | 1.02E-94  | 1.87E-90  | 0.824 | 0.963 |
|-----------|---------|------------|-----------|-----------|-------|-------|
| CAPS      | 1       | -1.1744057 | 1.77E-110 | 3.24E-106 | 0.618 | 0.967 |
| MT-ATP6   | 1       | -1.1883699 | 1.46E-105 | 2.67E-101 | 0.558 | 0.936 |
| MT-ND2    | 1       | -1.2099094 | 2.79E-107 | 5.09E-103 | 0.266 | 0.855 |
| PAX1      | 1       | -1.2130984 | 4.89E-141 | 8.93E-137 | 0.32  | 0.929 |
| TSC22D1   | 1       | -1.3347035 | 2.26E-114 | 4.13E-110 | 0.45  | 0.928 |
| ID3       | 1       | -1.352387  | 3.41E-106 | 6.23E-102 | 0.147 | 0.77  |
| OGN       | 1       | -1.4029847 | 5.10E-136 | 9.30E-132 | 0.841 | 0.994 |
| SPTSSB    | 1       | -1.4088168 | 2.66E-108 | 4.86E-104 | 0.01  | 0.649 |
| PLAC9     | 1       | -1.4256722 | 1.60E-147 | 2.92E-143 | 0.517 | 0.99  |
| COL2A1    | 1       | -1.4424359 | 5.02E-137 | 9.16E-133 | 0.326 | 0.952 |
| FRZB      | 1       | -1.5239984 | 2.78E-94  | 5.07E-90  | 0.182 | 0.761 |
| CLEC3A    | 1       | -2.1198946 | 1.76E-172 | 3.20E-168 | 0.233 | 0.97  |
| gene      | cluster | avg_logFC  | p_val     | p_val_adj | pct.1 | pct.2 |
| SPP1      | 2       | 2.46846227 | 9.05E-112 | 1.65E-107 | 0.862 | 0.093 |
| MT2A      | 2       | 1.70877456 | 1.42E-122 | 2.60E-118 | 1     | 1     |
| PRG4      | 2       | 1.69357023 | 1.35E-73  | 2.47E-69  | 0.591 | 0.021 |
| CTSL      | 2       | 1.42620285 | 8.18E-81  | 1.49E-76  | 0.877 | 0.406 |
| HMGA1     | 2       | 1.32901031 | 1.21E-95  | 2.21E-91  | 0.831 | 0.182 |
| UPP1      | 2       | 1.29720318 | 1.73E-106 | 3.15E-102 | 0.809 | 0.082 |
| SOD2      | 2       | 1.26181872 | 1.59E-81  | 2.89E-77  | 0.996 | 0.872 |
| S100A2    | 2       | 1.23798166 | 1.53E-47  | 2.80E-43  | 0.68  | 0.254 |
| TM4SF1    | 2       | 1.1535034  | 1.92E-67  | 3.50E-63  | 0.818 | 0.333 |
| PTGS2     | 2       | 1.11148959 | 1.30E-80  | 2.36E-76  | 0.669 | 0.056 |
| CD55      | 2       | 1.03278673 | 8.70E-75  | 1.59E-70  | 0.892 | 0.429 |
| VEGFA     | 2       | 1.02138342 | 1.87E-77  | 3.42E-73  | 0.86  | 0.333 |
| IGFBP3    | 2       | 1.00309022 | 6.52E-54  | 1.19E-49  | 0.502 | 0.04  |
| TNFRSF12A | 2       | 0.99721361 | 5.56E-73  | 1.01E-68  | 0.71  | 0.135 |
| FN1       | 2       | 0.95901593 | 8.87E-58  | 1.62E-53  | 0.998 | 0.993 |
| BMP2      | 2       | 0.92266865 | 1.05E-61  | 1.92E-57  | 0.519 | 0.019 |
| WTAP      | 2       | 0.92037518 | 7.00E-64  | 1.28E-59  | 0.879 | 0.459 |
| COMP      | 2       | 0.89199081 | 9.14E-25  | 1.67E-20  | 0.903 | 0.709 |
| MT1X      | 2       | 0.89132918 | 7.21E-49  | 1.32E-44  | 1     | 1     |
| PMP22     | 2       | 0.88573962 | 3.12E-68  | 5.70E-64  | 0.922 | 0.545 |
| STK17A    | 2       | 0.88153502 | 8.82E-60  | 1.61E-55  | 0.638 | 0.138 |
| C11orf96  | 2       | 0.87502218 | 4.52E-51  | 8.25E-47  | 0.492 | 0.049 |
| MRPS6     | 2       | 0.86393233 | 4.27E-52  | 7.79E-48  | 0.985 | 0.848 |
| FABP5     | 2       | 0.86390377 | 2.63E-17  | 4.81E-13  | 0.458 | 0.245 |
| ERO1A     | 2       | 0.81550087 | 7.02E-57  | 1.28E-52  | 0.731 | 0.28  |

|          |   |            |           |          |       |       |
|----------|---|------------|-----------|----------|-------|-------|
| NRP2     | 2 | 0.80659621 | 6.56E-48  | 1.20E-43 | 0.519 | 0.086 |
| CCDC85B  | 2 | 0.8035535  | 3.23E-46  | 5.90E-42 | 0.873 | 0.576 |
| DDIT4L   | 2 | 0.77888341 | 8.94E-37  | 1.63E-32 | 0.816 | 0.494 |
| MIF      | 2 | 0.77775291 | 2.62E-101 | 4.77E-97 | 1     | 1     |
| NDRG1    | 2 | 0.77340843 | 1.72E-57  | 3.14E-53 | 0.758 | 0.287 |
| SERPINE2 | 2 | 0.72297339 | 1.04E-29  | 1.89E-25 | 1     | 0.995 |
| SNHG12   | 2 | 0.71903515 | 3.20E-48  | 5.84E-44 | 0.678 | 0.245 |
| BZW1     | 2 | 0.70631342 | 1.13E-49  | 2.06E-45 | 0.794 | 0.385 |
| TMSB10   | 2 | 0.70073591 | 1.04E-44  | 1.90E-40 | 0.998 | 0.993 |
| RABGGTB  | 2 | 0.67736131 | 1.80E-50  | 3.29E-46 | 0.833 | 0.501 |
| TIMP3    | 2 | 0.65644813 | 1.86E-23  | 3.39E-19 | 0.689 | 0.427 |
| PPP3CA   | 2 | 0.64789649 | 3.74E-34  | 6.82E-30 | 0.881 | 0.573 |
| SLC25A37 | 2 | 0.64737682 | 1.94E-51  | 3.55E-47 | 0.928 | 0.597 |
| CXCL8    | 2 | 0.6395576  | 6.14E-17  | 1.12E-12 | 0.167 | 0.007 |
| MT1M     | 2 | 0.62086868 | 1.21E-18  | 2.21E-14 | 0.784 | 0.65  |
| MT1G     | 2 | 0.5966878  | 1.56E-16  | 2.85E-12 | 1     | 0.998 |
| C15orf48 | 2 | 0.59420241 | 1.52E-25  | 2.78E-21 | 0.256 | 0.014 |
| ISG20    | 2 | 0.59350479 | 5.73E-34  | 1.05E-29 | 0.655 | 0.324 |
| IER3     | 2 | 0.59247842 | 2.79E-30  | 5.09E-26 | 0.445 | 0.119 |
| SMOX     | 2 | 0.58521445 | 1.56E-30  | 2.84E-26 | 0.504 | 0.172 |
| TREM1    | 2 | 0.5788892  | 1.82E-44  | 3.31E-40 | 0.381 | 0.005 |
| GSTO1    | 2 | 0.57215735 | 1.88E-35  | 3.43E-31 | 0.845 | 0.578 |
| BAALC    | 2 | 0.55466654 | 1.11E-20  | 2.02E-16 | 0.591 | 0.338 |
| SLC2A1   | 2 | 0.55375843 | 2.16E-35  | 3.94E-31 | 0.434 | 0.082 |
| SLC3A2   | 2 | 0.5513741  | 8.37E-21  | 1.53E-16 | 0.443 | 0.186 |
| TGFBI    | 2 | 0.54654149 | 8.99E-26  | 1.64E-21 | 0.443 | 0.145 |
| SPRY2    | 2 | 0.54598626 | 1.11E-39  | 2.03E-35 | 0.439 | 0.061 |
| RGCC     | 2 | 0.54463461 | 6.81E-31  | 1.24E-26 | 0.939 | 0.725 |
| BHLHE40  | 2 | 0.53820169 | 5.80E-19  | 1.06E-14 | 0.602 | 0.38  |
| EIF4EBP1 | 2 | 0.53668883 | 2.15E-27  | 3.93E-23 | 0.682 | 0.394 |
| ENO2     | 2 | 0.52908586 | 8.88E-36  | 1.62E-31 | 0.597 | 0.228 |
| EIF1     | 2 | 0.52124361 | 8.34E-55  | 1.52E-50 | 1     | 1     |
| MT1H     | 2 | 0.5206268  | 7.53E-14  | 1.37E-09 | 0.958 | 0.942 |
| CLEC2B   | 2 | 0.52062232 | 7.60E-18  | 1.39E-13 | 0.316 | 0.093 |
| COX17    | 2 | 0.51681302 | 2.08E-32  | 3.79E-28 | 0.854 | 0.587 |
| ZNF593   | 2 | 0.515339   | 4.99E-34  | 9.11E-30 | 0.646 | 0.308 |
| CCND1    | 2 | 0.50963152 | 3.10E-35  | 5.66E-31 | 0.422 | 0.07  |
| ARF6     | 2 | 0.508897   | 1.05E-32  | 1.92E-28 | 0.689 | 0.357 |
| HLA-DRB1 | 2 | 0.49764819 | 1.69E-33  | 3.09E-29 | 0.487 | 0.131 |

|           |   |            |          |            |       |       |
|-----------|---|------------|----------|------------|-------|-------|
| NT5E      | 2 | 0.48762422 | 8.19E-27 | 1.49E-22   | 0.532 | 0.214 |
| PLAUR     | 2 | 0.48611986 | 4.01E-28 | 7.32E-24   | 0.513 | 0.191 |
| S100A16   | 2 | 0.47072809 | 9.32E-22 | 1.70E-17   | 0.502 | 0.233 |
| VAPA      | 2 | 0.46679365 | 3.36E-31 | 6.13E-27   | 0.962 | 0.839 |
| PPP1R15A  | 2 | 0.46581341 | 1.61E-27 | 2.95E-23   | 0.458 | 0.147 |
| TGM2      | 2 | 0.46355039 | 8.27E-28 | 1.51E-23   | 0.511 | 0.191 |
| ERRFI1    | 2 | 0.46246284 | 2.28E-18 | 4.16E-14   | 0.426 | 0.182 |
| CD44      | 2 | 0.4588083  | 3.27E-29 | 5.96E-25   | 0.898 | 0.639 |
| CTHRC1    | 2 | 0.4529481  | 5.79E-25 | 1.06E-20   | 0.328 | 0.056 |
| SELK      | 2 | 0.44909541 | 6.24E-28 | 1.14E-23   | 0.892 | 0.727 |
| PHLDA1    | 2 | 0.44716311 | 2.85E-22 | 5.21E-18   | 0.273 | 0.037 |
| PPP1CB    | 2 | 0.44578871 | 9.54E-18 | 1.74E-13   | 0.82  | 0.648 |
| RNF145    | 2 | 0.4423916  | 1.60E-16 | 2.92E-12   | 0.445 | 0.219 |
| ZNF385D   | 2 | 0.44202119 | 6.59E-20 | 1.20E-15   | 0.68  | 0.462 |
| RELB      | 2 | 0.44184621 | 2.96E-27 | 5.41E-23   | 0.367 | 0.075 |
| AK2       | 2 | 0.43911713 | 7.21E-17 | 1.32E-12   | 0.701 | 0.529 |
| BTG1      | 2 | 0.43791386 | 7.59E-23 | 1.38E-18   | 0.977 | 0.918 |
| FNIP2     | 2 | 0.43371019 | 1.40E-26 | 2.55E-22   | 0.468 | 0.156 |
| DDIT3     | 2 | 0.43217488 | 3.94E-16 | 7.19E-12   | 0.519 | 0.298 |
| EIF4A2    | 2 | 0.43180993 | 9.44E-33 | 1.72E-28   | 0.996 | 0.977 |
| PPFIBP1   | 2 | 0.42784593 | 8.69E-17 | 1.59E-12   | 0.547 | 0.34  |
| RGS2      | 2 | 0.42757365 | 2.60E-12 | 4.74E-08   | 0.494 | 0.294 |
| MT1E      | 2 | 0.42603571 | 5.73E-13 | 1.05E-08   | 1     | 1     |
| CHI3L2    | 2 | 0.42198224 | 9.41E-09 | 0.00017167 | 0.544 | 0.399 |
| DNER      | 2 | 0.41801481 | 1.57E-21 | 2.86E-17   | 0.614 | 0.336 |
| SLC5A3    | 2 | 0.41705641 | 7.34E-15 | 1.34E-10   | 0.57  | 0.359 |
| TNFRSF11B | 2 | 0.41650765 | 2.49E-06 | 0.04539279 | 0.663 | 0.576 |
| ADSS      | 2 | 0.40390654 | 2.55E-16 | 4.66E-12   | 0.585 | 0.389 |
| ARRDC3    | 2 | 0.40283679 | 8.44E-15 | 1.54E-10   | 0.462 | 0.254 |
| VIMP      | 2 | 0.40275297 | 1.61E-20 | 2.94E-16   | 0.79  | 0.557 |
| RNF114    | 2 | 0.40171471 | 1.36E-17 | 2.49E-13   | 0.593 | 0.366 |
| HMGA2     | 2 | 0.39798508 | 8.20E-33 | 1.50E-28   | 0.294 | 0.005 |
| TRMT112   | 2 | 0.39792786 | 4.27E-22 | 7.79E-18   | 0.939 | 0.828 |
| EMP3      | 2 | 0.39463023 | 3.59E-22 | 6.54E-18   | 0.93  | 0.828 |
| CTNNB1    | 2 | 0.39453182 | 1.09E-09 | 1.99E-05   | 0.411 | 0.252 |
| FOSL1     | 2 | 0.39193801 | 1.94E-29 | 3.54E-25   | 0.278 | 0.009 |
| ARPP19    | 2 | 0.38831729 | 1.64E-17 | 2.98E-13   | 0.597 | 0.371 |
| EIF1B     | 2 | 0.38790458 | 1.22E-21 | 2.23E-17   | 0.778 | 0.541 |
| TMEM38B   | 2 | 0.38739779 | 2.10E-17 | 3.84E-13   | 0.576 | 0.361 |

|            |   |            |          |            |       |       |
|------------|---|------------|----------|------------|-------|-------|
| SFT2D1     | 2 | 0.38307048 | 1.73E-21 | 3.15E-17   | 0.773 | 0.566 |
| FAM162A    | 2 | 0.38272943 | 2.55E-20 | 4.65E-16   | 0.915 | 0.788 |
| CLK1       | 2 | 0.37973296 | 3.26E-17 | 5.94E-13   | 0.593 | 0.366 |
| CSGALNACT2 | 2 | 0.37926753 | 7.94E-24 | 1.45E-19   | 0.364 | 0.089 |
| GBE1       | 2 | 0.37233333 | 2.39E-13 | 4.37E-09   | 0.591 | 0.406 |
| ATP6V1G1   | 2 | 0.37046664 | 8.98E-18 | 1.64E-13   | 0.96  | 0.93  |
| AC090498.1 | 2 | 0.36406413 | 5.84E-52 | 1.07E-47   | 1     | 1     |
| SLC7A2     | 2 | 0.36389037 | 1.46E-25 | 2.67E-21   | 0.273 | 0.023 |
| GPRC5A     | 2 | 0.35990211 | 1.78E-20 | 3.24E-16   | 0.347 | 0.098 |
| GRB10      | 2 | 0.35939132 | 9.70E-27 | 1.77E-22   | 0.261 | 0.012 |
| PFDN2      | 2 | 0.35659073 | 1.47E-15 | 2.68E-11   | 0.642 | 0.483 |
| SERPINE1   | 2 | 0.35525824 | 9.39E-19 | 1.71E-14   | 0.265 | 0.051 |
| PTGES3     | 2 | 0.35391317 | 1.39E-22 | 2.54E-18   | 0.96  | 0.893 |
| SH3BGRL3   | 2 | 0.35201191 | 5.52E-24 | 1.01E-19   | 0.996 | 0.981 |
| LRRFIP1    | 2 | 0.35112021 | 1.43E-17 | 2.61E-13   | 0.494 | 0.245 |
| DNAJB9     | 2 | 0.34987575 | 8.54E-13 | 1.56E-08   | 0.718 | 0.541 |
| GOLT1B     | 2 | 0.34949794 | 1.38E-15 | 2.52E-11   | 0.449 | 0.231 |
| SLC20A1    | 2 | 0.34900248 | 1.59E-17 | 2.91E-13   | 0.328 | 0.103 |
| ABI3BP     | 2 | 0.3489452  | 2.18E-06 | 0.03975274 | 0.504 | 0.413 |
| SMS        | 2 | 0.34725009 | 5.27E-14 | 9.61E-10   | 0.583 | 0.413 |
| VMP1       | 2 | 0.34495659 | 5.91E-08 | 0.0010792  | 0.578 | 0.436 |
| GPX1       | 2 | 0.34416015 | 5.53E-14 | 1.01E-09   | 0.883 | 0.758 |
| AIMP1      | 2 | 0.34358389 | 3.57E-14 | 6.51E-10   | 0.604 | 0.417 |
| SGIP1      | 2 | 0.33685049 | 1.89E-20 | 3.45E-16   | 0.235 | 0.026 |
| VDAC1      | 2 | 0.33649862 | 2.00E-15 | 3.65E-11   | 0.852 | 0.706 |
| USMG5      | 2 | 0.33632266 | 9.17E-24 | 1.67E-19   | 0.975 | 0.893 |
| PTP4A1     | 2 | 0.33433449 | 5.14E-10 | 9.38E-06   | 0.451 | 0.294 |
| GADD45GIP1 | 2 | 0.33381052 | 1.02E-16 | 1.86E-12   | 0.809 | 0.608 |
| CCL20      | 2 | 0.33374455 | 4.23E-12 | 7.72E-08   | 0.106 | 0     |
| LINC00152  | 2 | 0.33360202 | 2.43E-11 | 4.44E-07   | 0.388 | 0.203 |
| TFPI       | 2 | 0.33074617 | 1.85E-22 | 3.37E-18   | 0.254 | 0.026 |
| PGK1       | 2 | 0.32973655 | 2.67E-10 | 4.88E-06   | 0.909 | 0.841 |
| COX7A2     | 2 | 0.32930125 | 2.13E-24 | 3.89E-20   | 0.996 | 0.972 |
| METAP2     | 2 | 0.32729542 | 6.42E-19 | 1.17E-14   | 0.814 | 0.564 |
| CAMK2D     | 2 | 0.32479814 | 1.61E-17 | 2.93E-13   | 0.364 | 0.131 |
| SH3BP5     | 2 | 0.3222563  | 4.42E-12 | 8.06E-08   | 0.449 | 0.266 |
| FAP        | 2 | 0.31933957 | 1.22E-21 | 2.23E-17   | 0.314 | 0.065 |
| NTMT1      | 2 | 0.31777677 | 6.55E-16 | 1.19E-11   | 0.47  | 0.238 |
| RHOC       | 2 | 0.31597442 | 2.19E-13 | 4.00E-09   | 0.845 | 0.737 |



|              |   |            |          |            |       |       |
|--------------|---|------------|----------|------------|-------|-------|
| NOL7         | 2 | 0.31355968 | 3.94E-13 | 7.19E-09   | 0.644 | 0.469 |
| LINC00493    | 2 | 0.31273089 | 1.11E-16 | 2.02E-12   | 0.9   | 0.755 |
| FAM96B       | 2 | 0.31148506 | 4.36E-17 | 7.95E-13   | 0.788 | 0.606 |
| PPP1R14C     | 2 | 0.31068516 | 1.35E-23 | 2.46E-19   | 0.286 | 0.037 |
| FHL2         | 2 | 0.30923508 | 4.86E-20 | 8.87E-16   | 0.326 | 0.082 |
| PDE4B        | 2 | 0.30371249 | 2.71E-17 | 4.94E-13   | 0.337 | 0.11  |
| GNG5         | 2 | 0.30328079 | 8.88E-12 | 1.62E-07   | 0.642 | 0.492 |
| TGIF1        | 2 | 0.30294059 | 3.16E-09 | 5.77E-05   | 0.479 | 0.326 |
| C11orf31     | 2 | 0.30292028 | 6.03E-15 | 1.10E-10   | 0.799 | 0.613 |
| CLDND1       | 2 | 0.3016047  | 6.08E-15 | 1.11E-10   | 0.494 | 0.268 |
| WDR45B       | 2 | 0.29718777 | 5.77E-13 | 1.05E-08   | 0.4   | 0.203 |
| AKAP12       | 2 | 0.29586352 | 3.42E-17 | 6.25E-13   | 0.246 | 0.047 |
| ANXA5        | 2 | 0.29531912 | 1.26E-13 | 2.30E-09   | 0.873 | 0.762 |
| SNRPD1       | 2 | 0.29385183 | 8.94E-11 | 1.63E-06   | 0.604 | 0.457 |
| NBPF14       | 2 | 0.29346112 | 1.02E-16 | 1.85E-12   | 0.301 | 0.086 |
| POMP         | 2 | 0.28929834 | 1.37E-15 | 2.50E-11   | 0.886 | 0.737 |
| POLE4        | 2 | 0.28850271 | 1.89E-13 | 3.45E-09   | 0.604 | 0.406 |
| KITLG        | 2 | 0.2855786  | 4.25E-21 | 7.75E-17   | 0.301 | 0.058 |
| CCDC59       | 2 | 0.28513646 | 1.80E-12 | 3.28E-08   | 0.477 | 0.277 |
| CNIH1        | 2 | 0.28322599 | 6.99E-13 | 1.28E-08   | 0.786 | 0.632 |
| KDM7A        | 2 | 0.28303559 | 2.30E-20 | 4.20E-16   | 0.275 | 0.047 |
| NPR3         | 2 | 0.28237139 | 1.73E-20 | 3.15E-16   | 0.182 | 0     |
| SEC61G       | 2 | 0.28169459 | 7.75E-13 | 1.41E-08   | 0.994 | 0.993 |
| TYMP         | 2 | 0.28072967 | 2.44E-10 | 4.46E-06   | 0.339 | 0.168 |
| UFM1         | 2 | 0.27832529 | 1.73E-11 | 3.15E-07   | 0.64  | 0.483 |
| CDKN2B       | 2 | 0.27588402 | 2.19E-22 | 4.00E-18   | 0.244 | 0.021 |
| C4orf48      | 2 | 0.27442185 | 2.95E-09 | 5.38E-05   | 0.367 | 0.2   |
| EPB41L4A-AS1 | 2 | 0.27375865 | 6.18E-12 | 1.13E-07   | 0.915 | 0.844 |
| EPS8         | 2 | 0.27327906 | 1.20E-15 | 2.20E-11   | 0.369 | 0.145 |
| RAB13        | 2 | 0.27267817 | 2.11E-12 | 3.85E-08   | 0.917 | 0.79  |
| TBCA         | 2 | 0.27154099 | 6.56E-16 | 1.20E-11   | 0.975 | 0.907 |
| CLMP         | 2 | 0.26971824 | 1.31E-15 | 2.39E-11   | 0.284 | 0.082 |
| BTG3         | 2 | 0.26959175 | 5.48E-11 | 9.99E-07   | 0.383 | 0.2   |
| GJA1         | 2 | 0.26954093 | 1.03E-13 | 1.89E-09   | 0.252 | 0.072 |
| EVI2A        | 2 | 0.26936204 | 7.16E-18 | 1.31E-13   | 0.286 | 0.068 |
| KLF3         | 2 | 0.26837862 | 1.80E-06 | 0.03277259 | 0.309 | 0.191 |
| TMEM45A      | 2 | 0.26652763 | 2.01E-07 | 0.00366283 | 0.82  | 0.737 |
| SVIP         | 2 | 0.26544302 | 1.40E-08 | 0.00025565 | 0.487 | 0.333 |
| SAR1A        | 2 | 0.26462785 | 1.15E-09 | 2.10E-05   | 0.502 | 0.333 |

|           |   |            |          |            |       |       |
|-----------|---|------------|----------|------------|-------|-------|
| RND3      | 2 | 0.26290189 | 2.95E-12 | 5.39E-08   | 0.22  | 0.061 |
| SLC39A14  | 2 | 0.26062294 | 3.33E-09 | 6.08E-05   | 0.606 | 0.441 |
| SH3GLB1   | 2 | 0.26016473 | 1.99E-10 | 3.63E-06   | 0.674 | 0.534 |
| ATP6V0B   | 2 | 0.25860005 | 1.19E-08 | 0.00021659 | 0.585 | 0.445 |
| NDUFB8    | 2 | 0.25858304 | 8.59E-10 | 1.57E-05   | 0.818 | 0.692 |
| TVP23B    | 2 | 0.25601637 | 1.65E-10 | 3.02E-06   | 0.379 | 0.207 |
| MRPL41    | 2 | 0.25583114 | 3.76E-09 | 6.86E-05   | 0.68  | 0.564 |
| MGST1     | 2 | 0.25331827 | 6.73E-08 | 0.0012278  | 0.324 | 0.175 |
| SLC25A36  | 2 | 0.25015269 | 5.34E-08 | 0.0009748  | 0.506 | 0.366 |
| SLC38A1   | 2 | -0.2501978 | 1.34E-16 | 2.44E-12   | 0.138 | 0.371 |
| CMPK1     | 2 | -0.2507265 | 3.88E-14 | 7.07E-10   | 0.627 | 0.832 |
| GABARAPL2 | 2 | -0.2507528 | 7.40E-14 | 1.35E-09   | 0.769 | 0.914 |
| ANXA4     | 2 | -0.2515085 | 2.51E-10 | 4.58E-06   | 0.246 | 0.427 |
| ISM1      | 2 | -0.2526322 | 9.40E-25 | 1.72E-20   | 0.021 | 0.252 |
| C1orf122  | 2 | -0.2530799 | 3.76E-11 | 6.85E-07   | 0.199 | 0.385 |
| MLEC      | 2 | -0.2535394 | 1.54E-12 | 2.82E-08   | 0.21  | 0.413 |
| COX7A2L   | 2 | -0.2538718 | 2.66E-15 | 4.85E-11   | 0.826 | 0.921 |
| MRC2      | 2 | -0.2538904 | 4.86E-20 | 8.87E-16   | 0.066 | 0.296 |
| HINT1     | 2 | -0.2545868 | 2.52E-19 | 4.59E-15   | 0.987 | 0.993 |
| TUBB2A    | 2 | -0.2551192 | 1.58E-19 | 2.88E-15   | 0.051 | 0.266 |
| YPEL3     | 2 | -0.2551522 | 5.93E-19 | 1.08E-14   | 0.091 | 0.326 |
| GPAA1     | 2 | -0.2552101 | 8.51E-16 | 1.55E-11   | 0.165 | 0.401 |
| GADD45B   | 2 | -0.2558034 | 1.33E-15 | 2.43E-11   | 0.129 | 0.354 |
| MPC2      | 2 | -0.2561554 | 6.11E-14 | 1.11E-09   | 0.282 | 0.51  |
| LRRC2     | 2 | -0.2567093 | 1.09E-17 | 1.98E-13   | 0.1   | 0.329 |
| CDC42EP5  | 2 | -0.2574187 | 3.71E-12 | 6.77E-08   | 0.294 | 0.503 |
| SLC29A1   | 2 | -0.2578715 | 2.28E-14 | 4.16E-10   | 0.197 | 0.427 |
| PRPSAP1   | 2 | -0.2581311 | 3.17E-15 | 5.78E-11   | 0.153 | 0.378 |
| RCN3      | 2 | -0.2587097 | 1.16E-13 | 2.12E-09   | 0.195 | 0.417 |
| RPL37     | 2 | -0.259641  | 9.44E-37 | 1.72E-32   | 1     | 1     |
| EIF3K     | 2 | -0.2617445 | 5.41E-16 | 9.87E-12   | 0.822 | 0.932 |
| NENF      | 2 | -0.2622727 | 7.08E-16 | 1.29E-11   | 0.85  | 0.958 |
| MATN4     | 2 | -0.2634737 | 9.10E-16 | 1.66E-11   | 0.066 | 0.259 |
| C14orf1   | 2 | -0.2639866 | 4.84E-17 | 8.83E-13   | 0.131 | 0.368 |
| CTSF      | 2 | -0.2649402 | 9.70E-21 | 1.77E-16   | 0.085 | 0.336 |
| C19orf43  | 2 | -0.2653196 | 8.72E-15 | 1.59E-10   | 0.744 | 0.89  |
| MAGEF1    | 2 | -0.2653615 | 2.15E-19 | 3.92E-15   | 0.093 | 0.336 |
| NPM1      | 2 | -0.265432  | 2.19E-16 | 4.00E-12   | 0.996 | 1     |
| C12orf57  | 2 | -0.2656198 | 1.38E-16 | 2.51E-12   | 0.943 | 0.984 |

|          |   |            |          |           |       |       |
|----------|---|------------|----------|-----------|-------|-------|
| UBA52    | 2 | -0.2662148 | 1.07E-38 | 1.95E-34  | 1     | 1     |
| RPS12    | 2 | -0.2664404 | 8.28E-41 | 1.51E-36  | 1     | 1     |
| JTB      | 2 | -0.2676862 | 1.34E-13 | 2.44E-09  | 0.57  | 0.781 |
| PIK3R1   | 2 | -0.2677933 | 6.30E-15 | 1.15E-10  | 0.051 | 0.226 |
| ANG      | 2 | -0.2681133 | 2.16E-15 | 3.94E-11  | 0.176 | 0.406 |
| MYL12B   | 2 | -0.2681204 | 8.82E-12 | 1.61E-07  | 0.494 | 0.678 |
| RNASET2  | 2 | -0.2682224 | 4.51E-18 | 8.23E-14  | 0.157 | 0.41  |
| COMMD6   | 2 | -0.2682606 | 4.20E-23 | 7.67E-19  | 0.994 | 1     |
| CD8B     | 2 | -0.2684286 | 8.45E-24 | 1.54E-19  | 0.055 | 0.308 |
| AFF3     | 2 | -0.2686983 | 2.60E-29 | 4.75E-25  | 0.008 | 0.259 |
| JUN      | 2 | -0.268875  | 5.02E-12 | 9.16E-08  | 0.144 | 0.333 |
| SERBP1   | 2 | -0.2694244 | 1.99E-13 | 3.63E-09  | 0.686 | 0.848 |
| SMIM19   | 2 | -0.2694498 | 4.50E-14 | 8.21E-10  | 0.299 | 0.531 |
| DMKN     | 2 | -0.26963   | 3.17E-15 | 5.78E-11  | 0.273 | 0.527 |
| PLA2G16  | 2 | -0.2705709 | 4.21E-15 | 7.68E-11  | 0.199 | 0.427 |
| RPL22    | 2 | -0.2707016 | 5.82E-31 | 1.06E-26  | 1     | 1     |
| PRKAR1A  | 2 | -0.2710758 | 1.11E-06 | 0.0202915 | 0.407 | 0.552 |
| CD302    | 2 | -0.2718616 | 3.47E-24 | 6.33E-20  | 0.064 | 0.326 |
| PIGT     | 2 | -0.2718616 | 4.14E-21 | 7.55E-17  | 0.066 | 0.303 |
| MSMO1    | 2 | -0.2720055 | 6.73E-13 | 1.23E-08  | 0.127 | 0.319 |
| RPS3     | 2 | -0.2724101 | 2.28E-47 | 4.16E-43  | 1     | 1     |
| SOX9     | 2 | -0.2726114 | 5.45E-11 | 9.95E-07  | 0.564 | 0.73  |
| RPL18A   | 2 | -0.273067  | 2.36E-43 | 4.31E-39  | 1     | 1     |
| CCDC8    | 2 | -0.2737284 | 4.72E-25 | 8.61E-21  | 0.032 | 0.275 |
| RBMX     | 2 | -0.2744403 | 2.14E-10 | 3.90E-06  | 0.528 | 0.667 |
| MIR99AHG | 2 | -0.2744709 | 9.10E-27 | 1.66E-22  | 0.044 | 0.315 |
| DSTN     | 2 | -0.2744967 | 8.23E-19 | 1.50E-14  | 0.992 | 0.998 |
| PAM      | 2 | -0.2759718 | 4.17E-16 | 7.61E-12  | 0.324 | 0.594 |
| VAMP5    | 2 | -0.2773283 | 1.48E-14 | 2.70E-10  | 0.271 | 0.508 |
| RARRES3  | 2 | -0.2775041 | 2.39E-27 | 4.36E-23  | 0.032 | 0.296 |
| COL6A1   | 2 | -0.2775773 | 8.36E-14 | 1.53E-09  | 0.225 | 0.45  |
| TCEA2    | 2 | -0.2778436 | 2.18E-16 | 3.97E-12  | 0.206 | 0.455 |
| BEX2     | 2 | -0.2778436 | 2.33E-16 | 4.26E-12  | 0.201 | 0.457 |
| RPL37A   | 2 | -0.278103  | 6.11E-51 | 1.11E-46  | 1     | 1     |
| HSPA8    | 2 | -0.2783177 | 8.18E-11 | 1.49E-06  | 0.333 | 0.529 |
| SCPEP1   | 2 | -0.2784869 | 3.88E-21 | 7.07E-17  | 0.087 | 0.338 |
| MYDGF    | 2 | -0.2792303 | 3.01E-11 | 5.49E-07  | 0.642 | 0.788 |
| OS9      | 2 | -0.2794073 | 2.80E-13 | 5.11E-09  | 0.273 | 0.485 |
| IFI27L2  | 2 | -0.2794644 | 5.25E-17 | 9.58E-13  | 0.733 | 0.886 |

|             |   |            |          |            |       |       |
|-------------|---|------------|----------|------------|-------|-------|
| EBPL        | 2 | -0.2816243 | 1.16E-14 | 2.11E-10   | 0.248 | 0.48  |
| NAA38       | 2 | -0.2817892 | 1.77E-11 | 3.24E-07   | 0.434 | 0.615 |
| CCPG1       | 2 | -0.2819128 | 6.92E-13 | 1.26E-08   | 0.271 | 0.492 |
| LINC01503   | 2 | -0.2823229 | 6.46E-11 | 1.18E-06   | 0.191 | 0.375 |
| RPL14       | 2 | -0.2830638 | 3.02E-42 | 5.50E-38   | 1     | 1     |
| QARS        | 2 | -0.2832985 | 3.82E-22 | 6.97E-18   | 0.083 | 0.343 |
| SOCS3       | 2 | -0.2837342 | 8.94E-17 | 1.63E-12   | 0.104 | 0.326 |
| GSTP1       | 2 | -0.2838535 | 2.70E-15 | 4.92E-11   | 0.934 | 0.967 |
| GREM1       | 2 | -0.2841132 | 2.67E-17 | 4.87E-13   | 0.006 | 0.159 |
| EIF3J-AS1   | 2 | -0.2841986 | 2.41E-19 | 4.40E-15   | 0.146 | 0.406 |
| ID11        | 2 | -0.2843161 | 3.67E-16 | 6.69E-12   | 0.125 | 0.347 |
| CHAD        | 2 | -0.2844743 | 7.05E-27 | 1.29E-22   | 0.008 | 0.24  |
| NFIC        | 2 | -0.2852363 | 4.16E-16 | 7.59E-12   | 0.182 | 0.422 |
| HOXC10      | 2 | -0.2857399 | 2.44E-13 | 4.45E-09   | 0.485 | 0.704 |
| SERTAD4-AS1 | 2 | -0.2858758 | 1.98E-25 | 3.61E-21   | 0.044 | 0.303 |
| DDOST       | 2 | -0.2874131 | 5.06E-14 | 9.23E-10   | 0.256 | 0.478 |
| ARL6IP4     | 2 | -0.2878753 | 1.48E-18 | 2.70E-14   | 0.805 | 0.923 |
| SARAF       | 2 | -0.2882064 | 7.09E-14 | 1.29E-09   | 0.519 | 0.702 |
| ETFB        | 2 | -0.2885309 | 1.76E-14 | 3.20E-10   | 0.316 | 0.543 |
| LTA4H       | 2 | -0.2889394 | 7.78E-12 | 1.42E-07   | 0.373 | 0.562 |
| IFITM1      | 2 | -0.2890169 | 1.05E-07 | 0.00190721 | 0.311 | 0.457 |
| PDGFRA      | 2 | -0.2891068 | 1.16E-23 | 2.12E-19   | 0.07  | 0.338 |
| SUMF2       | 2 | -0.289392  | 4.01E-18 | 7.33E-14   | 0.22  | 0.503 |
| CRYAB       | 2 | -0.2893952 | 1.23E-10 | 2.24E-06   | 0.648 | 0.807 |
| RPS29       | 2 | -0.2899509 | 5.15E-50 | 9.40E-46   | 1     | 1     |
| PDIA4       | 2 | -0.2915875 | 4.37E-18 | 7.98E-14   | 0.144 | 0.392 |
| CSDE1       | 2 | -0.2916232 | 2.63E-14 | 4.80E-10   | 0.581 | 0.788 |
| MKX         | 2 | -0.2920283 | 2.50E-20 | 4.57E-16   | 0.097 | 0.347 |
| TMED3       | 2 | -0.2925005 | 1.10E-14 | 2.00E-10   | 0.307 | 0.538 |
| IER2        | 2 | -0.292561  | 1.31E-13 | 2.39E-09   | 0.239 | 0.466 |
| DPP7        | 2 | -0.2927852 | 8.01E-14 | 1.46E-09   | 0.398 | 0.636 |
| SLC25A3     | 2 | -0.2938575 | 2.95E-19 | 5.39E-15   | 0.864 | 0.932 |
| LCN2        | 2 | -0.2940438 | 3.44E-07 | 0.00627223 | 0.337 | 0.503 |
| CHPT1       | 2 | -0.2941171 | 9.46E-15 | 1.73E-10   | 0.443 | 0.671 |
| SERPING1    | 2 | -0.2949223 | 9.71E-14 | 1.77E-09   | 0.32  | 0.557 |
| DUT         | 2 | -0.2951592 | 3.26E-15 | 5.95E-11   | 0.441 | 0.66  |
| OXA1L       | 2 | -0.2954285 | 3.67E-12 | 6.70E-08   | 0.375 | 0.569 |
| SGCB        | 2 | -0.2963403 | 1.81E-17 | 3.29E-13   | 0.229 | 0.49  |
| RPS4Y1      | 2 | -0.2963505 | 4.34E-24 | 7.91E-20   | 0.983 | 0.998 |

|            |   |            |          |          |       |       |
|------------|---|------------|----------|----------|-------|-------|
| PIM3       | 2 | -0.2970041 | 9.92E-14 | 1.81E-09 | 0.288 | 0.517 |
| AC005152.3 | 2 | -0.2973214 | 3.38E-28 | 6.17E-24 | 0.023 | 0.282 |
| RPL13      | 2 | -0.2977996 | 2.38E-57 | 4.35E-53 | 1     | 1     |
| SSR1       | 2 | -0.2992361 | 1.23E-14 | 2.24E-10 | 0.311 | 0.555 |
| NMRK1      | 2 | -0.2992541 | 2.55E-17 | 4.65E-13 | 0.22  | 0.471 |
| SLC1A5     | 2 | -0.2998857 | 2.88E-24 | 5.25E-20 | 0.074 | 0.347 |
| RPL15      | 2 | -0.2999974 | 4.97E-62 | 9.07E-58 | 1     | 1     |
| UQCRH      | 2 | -0.3001163 | 2.09E-21 | 3.82E-17 | 0.939 | 0.979 |
| ANGPTL5    | 2 | -0.3007454 | 3.78E-22 | 6.90E-18 | 0.089 | 0.347 |
| RPS23      | 2 | -0.3024428 | 1.06E-50 | 1.93E-46 | 1     | 1     |
| DDIT4      | 2 | -0.3026566 | 4.90E-10 | 8.94E-06 | 0.32  | 0.517 |
| TUBB2B     | 2 | -0.3029909 | 1.29E-09 | 2.36E-05 | 0.316 | 0.494 |
| PRKCSH     | 2 | -0.3031614 | 1.99E-18 | 3.63E-14 | 0.214 | 0.48  |
| ABHD14A    | 2 | -0.3039037 | 2.49E-24 | 4.54E-20 | 0.068 | 0.331 |
| BEX4       | 2 | -0.3055363 | 3.72E-15 | 6.80E-11 | 0.371 | 0.613 |
| TCEAL2     | 2 | -0.3059728 | 1.06E-16 | 1.93E-12 | 0.282 | 0.543 |
| BBX        | 2 | -0.3066589 | 7.25E-18 | 1.32E-13 | 0.148 | 0.392 |
| HADHA      | 2 | -0.3067528 | 6.50E-18 | 1.19E-13 | 0.239 | 0.497 |
| CALM1      | 2 | -0.3078318 | 6.05E-13 | 1.10E-08 | 0.383 | 0.601 |
| CANX       | 2 | -0.3086265 | 3.67E-17 | 6.70E-13 | 0.504 | 0.748 |
| TMED2      | 2 | -0.3105267 | 3.66E-17 | 6.68E-13 | 0.678 | 0.879 |
| CFH        | 2 | -0.3112569 | 3.30E-09 | 6.02E-05 | 0.121 | 0.273 |
| RBM3       | 2 | -0.3113561 | 1.38E-14 | 2.51E-10 | 0.354 | 0.578 |
| RPS18      | 2 | -0.3117426 | 1.42E-54 | 2.59E-50 | 1     | 1     |
| RPS9       | 2 | -0.311971  | 3.19E-57 | 5.83E-53 | 1     | 1     |
| MPP6       | 2 | -0.3128516 | 1.25E-22 | 2.27E-18 | 0.146 | 0.434 |
| EIF3E      | 2 | -0.3131509 | 1.08E-20 | 1.97E-16 | 0.998 | 1     |
| NME4       | 2 | -0.3143588 | 4.47E-17 | 8.15E-13 | 0.222 | 0.476 |
| RPL6       | 2 | -0.3149379 | 2.85E-43 | 5.20E-39 | 1     | 1     |
| NUPR1      | 2 | -0.3158573 | 3.80E-16 | 6.94E-12 | 0.932 | 0.984 |
| OAF        | 2 | -0.3159221 | 4.18E-25 | 7.62E-21 | 0.072 | 0.347 |
| SEP1       | 2 | -0.3163641 | 9.40E-23 | 1.72E-18 | 0.089 | 0.354 |
| TOMM7      | 2 | -0.3165216 | 1.35E-45 | 2.47E-41 | 1     | 1     |
| RCN1       | 2 | -0.317033  | 3.54E-15 | 6.46E-11 | 0.242 | 0.471 |
| NINJ1      | 2 | -0.3172529 | 5.37E-17 | 9.80E-13 | 0.426 | 0.685 |
| HOXB8      | 2 | -0.3174429 | 1.63E-28 | 2.97E-24 | 0.034 | 0.308 |
| MEG3       | 2 | -0.31756   | 3.16E-14 | 5.76E-10 | 0.127 | 0.326 |
| TMED9      | 2 | -0.3176342 | 1.72E-14 | 3.13E-10 | 0.407 | 0.627 |
| RCN2       | 2 | -0.3176799 | 2.77E-15 | 5.05E-11 | 0.424 | 0.653 |

|              |   |            |          |          |       |       |
|--------------|---|------------|----------|----------|-------|-------|
| EIF3D        | 2 | -0.319038  | 1.45E-14 | 2.64E-10 | 0.621 | 0.793 |
| RP11-553L6.5 | 2 | -0.3190394 | 4.06E-23 | 7.42E-19 | 0.117 | 0.396 |
| RPL7A        | 2 | -0.3191346 | 1.61E-50 | 2.94E-46 | 1     | 1     |
| PRDX5        | 2 | -0.3202392 | 2.91E-22 | 5.31E-18 | 0.822 | 0.953 |
| RPS13        | 2 | -0.3203354 | 8.79E-50 | 1.60E-45 | 1     | 1     |
| C9orf3       | 2 | -0.3210724 | 2.50E-19 | 4.55E-15 | 0.189 | 0.455 |
| RPS7         | 2 | -0.3215563 | 7.08E-48 | 1.29E-43 | 1     | 1     |
| SLC44A1      | 2 | -0.3219271 | 3.98E-21 | 7.26E-17 | 0.142 | 0.415 |
| LY6E         | 2 | -0.3219389 | 1.32E-17 | 2.40E-13 | 0.208 | 0.464 |
| ASPN         | 2 | -0.3224607 | 8.66E-14 | 1.58E-09 | 0.03  | 0.182 |
| NKX3-2       | 2 | -0.3228064 | 9.90E-25 | 1.81E-20 | 0.019 | 0.247 |
| WWP2         | 2 | -0.3228673 | 1.12E-12 | 2.05E-08 | 0.383 | 0.594 |
| ERP29        | 2 | -0.3237134 | 4.80E-18 | 8.77E-14 | 0.53  | 0.751 |
| GSTA4        | 2 | -0.3239613 | 3.97E-21 | 7.24E-17 | 0.172 | 0.445 |
| LSP1         | 2 | -0.3276624 | 3.09E-22 | 5.64E-18 | 0.059 | 0.305 |
| ARPC1A       | 2 | -0.3291965 | 1.92E-19 | 3.50E-15 | 0.356 | 0.615 |
| CCDC88A      | 2 | -0.3292959 | 4.41E-25 | 8.06E-21 | 0.087 | 0.373 |
| CD320        | 2 | -0.3293401 | 3.28E-18 | 5.98E-14 | 0.246 | 0.506 |
| ENAH         | 2 | -0.3294484 | 4.57E-22 | 8.35E-18 | 0.117 | 0.387 |
| INSIG1       | 2 | -0.3295689 | 7.30E-10 | 1.33E-05 | 0.288 | 0.457 |
| P4HA1        | 2 | -0.3315252 | 2.96E-14 | 5.41E-10 | 0.428 | 0.646 |
| UQCRB        | 2 | -0.332936  | 1.50E-20 | 2.74E-16 | 0.941 | 1     |
| RPLP1        | 2 | -0.3333125 | 2.92E-65 | 5.32E-61 | 1     | 1     |
| RPL8         | 2 | -0.3343618 | 4.83E-60 | 8.80E-56 | 1     | 1     |
| RPS6         | 2 | -0.3352183 | 1.85E-67 | 3.38E-63 | 1     | 1     |
| RPS17        | 2 | -0.3361916 | 3.39E-48 | 6.19E-44 | 1     | 1     |
| RPS5         | 2 | -0.336268  | 1.00E-55 | 1.83E-51 | 1     | 1     |
| EIF2S3       | 2 | -0.3364101 | 4.12E-15 | 7.51E-11 | 0.398 | 0.625 |
| EFNA1        | 2 | -0.3364378 | 3.62E-20 | 6.60E-16 | 0.172 | 0.445 |
| PLPP1        | 2 | -0.3371084 | 1.01E-24 | 1.84E-20 | 0.066 | 0.331 |
| KDEL3        | 2 | -0.3378106 | 1.64E-24 | 3.00E-20 | 0.068 | 0.333 |
| GLTSCR2      | 2 | -0.3378762 | 6.09E-21 | 1.11E-16 | 0.824 | 0.951 |
| RPS27A       | 2 | -0.3406053 | 3.37E-65 | 6.16E-61 | 1     | 1     |
| C1S          | 2 | -0.34149   | 3.83E-19 | 6.99E-15 | 0.386 | 0.664 |
| TCEA3        | 2 | -0.3429302 | 1.17E-19 | 2.13E-15 | 0.184 | 0.443 |
| CD63         | 2 | -0.3447511 | 9.03E-21 | 1.65E-16 | 0.996 | 1     |
| CCDC102B     | 2 | -0.3447978 | 4.04E-32 | 7.37E-28 | 0.03  | 0.326 |
| COL5A2       | 2 | -0.3448921 | 4.45E-17 | 8.13E-13 | 0.142 | 0.38  |
| FIS1         | 2 | -0.3456162 | 8.34E-20 | 1.52E-15 | 0.456 | 0.72  |

|               |   |            |          |          |       |       |
|---------------|---|------------|----------|----------|-------|-------|
| ILF3-AS1      | 2 | -0.3458422 | 7.44E-24 | 1.36E-19 | 0.155 | 0.452 |
| LUC7L3        | 2 | -0.3464721 | 1.28E-21 | 2.34E-17 | 0.225 | 0.517 |
| PPP1R3C       | 2 | -0.3464843 | 1.96E-15 | 3.58E-11 | 0.25  | 0.483 |
| TUBB          | 2 | -0.3470279 | 1.81E-18 | 3.31E-14 | 0.672 | 0.86  |
| RPS4X         | 2 | -0.3494147 | 4.96E-65 | 9.05E-61 | 1     | 1     |
| EIF2A         | 2 | -0.3499024 | 4.45E-16 | 8.12E-12 | 0.559 | 0.741 |
| RP11-983P16.4 | 2 | -0.3505013 | 5.35E-25 | 9.76E-21 | 0.174 | 0.49  |
| RPN2          | 2 | -0.3512623 | 1.34E-28 | 2.45E-24 | 0.057 | 0.347 |
| TXNIP         | 2 | -0.3519267 | 2.73E-37 | 4.99E-33 | 0.015 | 0.331 |
| NOVA1         | 2 | -0.3521895 | 1.07E-12 | 1.96E-08 | 0.748 | 0.879 |
| TMEM230       | 2 | -0.3527449 | 1.25E-19 | 2.28E-15 | 0.517 | 0.751 |
| PNKD          | 2 | -0.3539856 | 3.83E-27 | 6.99E-23 | 0.176 | 0.508 |
| S100A13       | 2 | -0.3560977 | 2.81E-34 | 5.13E-30 | 0.996 | 1     |
| SRSF5         | 2 | -0.3568241 | 3.02E-17 | 5.52E-13 | 0.453 | 0.676 |
| TRPS1         | 2 | -0.3572899 | 1.22E-20 | 2.22E-16 | 0.254 | 0.545 |
| RPL23         | 2 | -0.357707  | 1.79E-45 | 3.26E-41 | 0.998 | 1     |
| NUCKS1        | 2 | -0.357791  | 1.48E-18 | 2.70E-14 | 0.432 | 0.683 |
| C1orf21       | 2 | -0.3582312 | 4.11E-19 | 7.49E-15 | 0.314 | 0.576 |
| GRN           | 2 | -0.3588999 | 5.56E-27 | 1.01E-22 | 0.093 | 0.396 |
| PRCP          | 2 | -0.3604931 | 4.56E-31 | 8.32E-27 | 0.059 | 0.368 |
| ST13          | 2 | -0.3610276 | 1.69E-27 | 3.09E-23 | 0.909 | 0.977 |
| ATP5A1        | 2 | -0.3622436 | 2.35E-21 | 4.29E-17 | 0.333 | 0.615 |
| NUCB1         | 2 | -0.3624933 | 1.69E-20 | 3.08E-16 | 0.318 | 0.59  |
| C7orf73       | 2 | -0.3636723 | 1.43E-21 | 2.60E-17 | 0.578 | 0.821 |
| FKBP10        | 2 | -0.3636872 | 1.02E-21 | 1.86E-17 | 0.191 | 0.483 |
| RPL5          | 2 | -0.3639105 | 4.86E-50 | 8.86E-46 | 1     | 1     |
| SOD1          | 2 | -0.3639498 | 3.89E-26 | 7.10E-22 | 0.917 | 0.974 |
| CMB9-22P13.1  | 2 | -0.363969  | 7.08E-21 | 1.29E-16 | 0.273 | 0.559 |
| CPE           | 2 | -0.3639781 | 2.44E-18 | 4.46E-14 | 0.487 | 0.727 |
| PNISR         | 2 | -0.3657816 | 1.20E-20 | 2.18E-16 | 0.485 | 0.737 |
| HMGB1         | 2 | -0.3666411 | 1.33E-22 | 2.43E-18 | 0.633 | 0.86  |
| RPL13A        | 2 | -0.367992  | 2.95E-80 | 5.38E-76 | 1     | 1     |
| HMGN3         | 2 | -0.368014  | 4.13E-24 | 7.54E-20 | 0.21  | 0.52  |
| H1FX          | 2 | -0.3689791 | 4.64E-23 | 8.46E-19 | 0.1   | 0.371 |
| DST           | 2 | -0.3692179 | 1.55E-20 | 2.82E-16 | 0.335 | 0.615 |
| FHL1          | 2 | -0.3694443 | 7.65E-20 | 1.40E-15 | 0.229 | 0.501 |
| TMEM98        | 2 | -0.3702636 | 2.49E-31 | 4.54E-27 | 0.1   | 0.434 |
| PTPRD-AS1     | 2 | -0.3717148 | 2.15E-25 | 3.92E-21 | 0.169 | 0.483 |
| PGAM1         | 2 | -0.3735887 | 1.94E-23 | 3.54E-19 | 0.614 | 0.869 |

|               |   |            |          |          |       |       |
|---------------|---|------------|----------|----------|-------|-------|
| TSPAN3        | 2 | -0.3737667 | 7.96E-22 | 1.45E-17 | 0.337 | 0.629 |
| MYLK          | 2 | -0.3740275 | 3.04E-23 | 5.55E-19 | 0.089 | 0.354 |
| MOXD1         | 2 | -0.3754018 | 1.53E-20 | 2.79E-16 | 0.161 | 0.431 |
| MYL6          | 2 | -0.3771222 | 3.45E-24 | 6.29E-20 | 0.856 | 0.939 |
| TSPAN4        | 2 | -0.3773732 | 3.27E-25 | 5.97E-21 | 0.191 | 0.515 |
| KDELR2        | 2 | -0.3779578 | 1.30E-24 | 2.37E-20 | 0.758 | 0.909 |
| DUSP1         | 2 | -0.3789689 | 6.16E-19 | 1.12E-14 | 0.328 | 0.604 |
| PPIB          | 2 | -0.3805983 | 6.05E-18 | 1.10E-13 | 0.831 | 0.928 |
| BTF3          | 2 | -0.3818247 | 4.78E-43 | 8.72E-39 | 0.996 | 1     |
| BHLHE41       | 2 | -0.3822863 | 5.03E-26 | 9.18E-22 | 0.131 | 0.434 |
| RPL30         | 2 | -0.3823111 | 3.54E-64 | 6.45E-60 | 1     | 1     |
| CREG1         | 2 | -0.3824967 | 4.86E-22 | 8.87E-18 | 0.356 | 0.639 |
| GOLIM4        | 2 | -0.3835622 | 6.33E-14 | 1.15E-09 | 0.273 | 0.503 |
| AHNAK         | 2 | -0.3856284 | 3.04E-24 | 5.55E-20 | 0.237 | 0.548 |
| ENPP1         | 2 | -0.3890013 | 2.24E-30 | 4.09E-26 | 0.076 | 0.394 |
| HERPUD1       | 2 | -0.3891672 | 2.46E-24 | 4.49E-20 | 0.248 | 0.557 |
| PPIA          | 2 | -0.3895594 | 7.34E-30 | 1.34E-25 | 0.905 | 0.988 |
| FXYP1         | 2 | -0.3898664 | 2.69E-18 | 4.91E-14 | 0.146 | 0.385 |
| HSPB1         | 2 | -0.3904996 | 3.49E-20 | 6.37E-16 | 0.521 | 0.783 |
| POLR2L        | 2 | -0.3914057 | 6.98E-24 | 1.27E-19 | 0.701 | 0.909 |
| RPL19         | 2 | -0.3923599 | 1.90E-81 | 3.47E-77 | 1     | 1     |
| DBP           | 2 | -0.394765  | 3.48E-31 | 6.35E-27 | 0.081 | 0.406 |
| ARL2BP        | 2 | -0.3954062 | 7.49E-24 | 1.37E-19 | 0.297 | 0.608 |
| MTDH          | 2 | -0.395672  | 9.22E-22 | 1.68E-17 | 0.439 | 0.69  |
| CYBRD1        | 2 | -0.3959872 | 1.85E-23 | 3.37E-19 | 0.367 | 0.657 |
| PLD3          | 2 | -0.3980928 | 3.19E-28 | 5.82E-24 | 0.197 | 0.543 |
| LITAF         | 2 | -0.3982769 | 4.60E-29 | 8.40E-25 | 0.265 | 0.618 |
| RPL10         | 2 | -0.4008391 | 7.18E-89 | 1.31E-84 | 1     | 1     |
| PPT1          | 2 | -0.4012691 | 4.10E-28 | 7.49E-24 | 0.184 | 0.515 |
| RPL18         | 2 | -0.4027014 | 1.43E-63 | 2.61E-59 | 1     | 1     |
| RPL9          | 2 | -0.4029267 | 5.81E-74 | 1.06E-69 | 1     | 1     |
| SERF2         | 2 | -0.4039177 | 2.00E-41 | 3.66E-37 | 0.998 | 1     |
| CTGF          | 2 | -0.405677  | 2.96E-18 | 5.40E-14 | 0.176 | 0.429 |
| TCEAL8        | 2 | -0.4059066 | 7.07E-26 | 1.29E-21 | 0.47  | 0.762 |
| HIST1H4C      | 2 | -0.4059398 | 1.49E-22 | 2.72E-18 | 0.358 | 0.655 |
| HEXB          | 2 | -0.4067931 | 3.21E-27 | 5.85E-23 | 0.212 | 0.541 |
| LRPAP1        | 2 | -0.406936  | 2.27E-23 | 4.14E-19 | 0.265 | 0.559 |
| RP5-1097P24.1 | 2 | -0.4076552 | 4.46E-36 | 8.13E-32 | 0.064 | 0.413 |
| COL9A2        | 2 | -0.407762  | 6.92E-26 | 1.26E-21 | 0.11  | 0.41  |



|            |   |            |          |          |       |       |
|------------|---|------------|----------|----------|-------|-------|
| RPLP2      | 2 | -0.4097679 | 1.23E-78 | 2.25E-74 | 1     | 1     |
| NDUFA11    | 2 | -0.4115495 | 3.25E-28 | 5.93E-24 | 0.769 | 0.925 |
| CRIP2      | 2 | -0.412618  | 5.27E-26 | 9.61E-22 | 0.203 | 0.517 |
| ZBTB20     | 2 | -0.4159645 | 1.25E-32 | 2.29E-28 | 0.131 | 0.49  |
| ATRNL1     | 2 | -0.4160877 | 2.89E-32 | 5.28E-28 | 0.081 | 0.41  |
| AC003090.1 | 2 | -0.416952  | 1.11E-42 | 2.02E-38 | 0.028 | 0.396 |
| NAP1L1     | 2 | -0.4176545 | 3.54E-32 | 6.47E-28 | 0.898 | 0.979 |
| VKORC1     | 2 | -0.4202691 | 2.57E-29 | 4.68E-25 | 0.862 | 0.96  |
| AP2M1      | 2 | -0.4202858 | 1.85E-25 | 3.38E-21 | 0.316 | 0.627 |
| RPS2       | 2 | -0.4218868 | 4.31E-79 | 7.86E-75 | 1     | 1     |
| PRUNE2     | 2 | -0.4239561 | 4.86E-27 | 8.87E-23 | 0.165 | 0.485 |
| SEPP1      | 2 | -0.4250951 | 5.96E-34 | 1.09E-29 | 0.144 | 0.52  |
| RPS16      | 2 | -0.4254661 | 2.30E-76 | 4.20E-72 | 1     | 1     |
| DNM3OS     | 2 | -0.4298518 | 6.18E-31 | 1.13E-26 | 0.104 | 0.438 |
| SPINT2     | 2 | -0.4298563 | 5.69E-27 | 1.04E-22 | 0.208 | 0.531 |
| CTSK       | 2 | -0.4303056 | 1.00E-34 | 1.82E-30 | 0.068 | 0.408 |
| SEC11A     | 2 | -0.4307542 | 6.37E-36 | 1.16E-31 | 0.792 | 0.928 |
| ATPIF1     | 2 | -0.4323368 | 7.84E-28 | 1.43E-23 | 0.445 | 0.769 |
| S100A1     | 2 | -0.4338271 | 1.29E-37 | 2.35E-33 | 0.996 | 1     |
| ARHGAP29   | 2 | -0.4340895 | 1.24E-23 | 2.26E-19 | 0.222 | 0.517 |
| PSAP       | 2 | -0.4389439 | 8.02E-33 | 1.46E-28 | 0.761 | 0.944 |
| MORF4L2    | 2 | -0.439485  | 1.22E-26 | 2.23E-22 | 0.411 | 0.704 |
| HDLBP      | 2 | -0.4397916 | 5.60E-26 | 1.02E-21 | 0.193 | 0.494 |
| HLA-B      | 2 | -0.4402208 | 2.95E-22 | 5.38E-18 | 0.653 | 0.86  |
| CCNG1      | 2 | -0.4406362 | 1.08E-29 | 1.97E-25 | 0.225 | 0.569 |
| GNAS       | 2 | -0.4429668 | 1.72E-28 | 3.14E-24 | 0.398 | 0.706 |
| TPM2       | 2 | -0.4430511 | 1.96E-28 | 3.58E-24 | 0.309 | 0.641 |
| TPD52L1    | 2 | -0.4434173 | 1.66E-34 | 3.04E-30 | 0.169 | 0.55  |
| LDHB       | 2 | -0.4435536 | 1.06E-30 | 1.93E-26 | 0.631 | 0.879 |
| CUTA       | 2 | -0.4444525 | 7.15E-32 | 1.31E-27 | 0.602 | 0.883 |
| CHRD2      | 2 | -0.4459027 | 6.91E-21 | 1.26E-16 | 0.072 | 0.308 |
| PKM        | 2 | -0.4498468 | 7.30E-33 | 1.33E-28 | 0.818 | 0.946 |
| RPL34      | 2 | -0.4513345 | 1.37E-91 | 2.50E-87 | 1     | 1     |
| CALR       | 2 | -0.4520767 | 6.96E-21 | 1.27E-16 | 0.428 | 0.692 |
| RPSA       | 2 | -0.4549688 | 5.67E-58 | 1.03E-53 | 1     | 1     |
| RPL23A     | 2 | -0.4551426 | 6.19E-88 | 1.13E-83 | 1     | 1     |
| ATRAID     | 2 | -0.4581102 | 2.61E-30 | 4.76E-26 | 0.636 | 0.897 |
| BRK1       | 2 | -0.4582781 | 3.32E-38 | 6.05E-34 | 0.691 | 0.942 |
| RNF130     | 2 | -0.4596087 | 4.10E-29 | 7.47E-25 | 0.331 | 0.662 |

|          |   |            |          |          |       |       |
|----------|---|------------|----------|----------|-------|-------|
| ARL6IP5  | 2 | -0.4622727 | 4.75E-35 | 8.67E-31 | 0.333 | 0.713 |
| RABAC1   | 2 | -0.4623925 | 5.90E-37 | 1.08E-32 | 0.693 | 0.932 |
| HSP90AB1 | 2 | -0.4626657 | 2.31E-36 | 4.22E-32 | 0.919 | 0.984 |
| PDE4DIP  | 2 | -0.4637818 | 2.38E-36 | 4.35E-32 | 0.186 | 0.569 |
| COL6A2   | 2 | -0.4671839 | 4.87E-25 | 8.88E-21 | 0.309 | 0.625 |
| PDIA3    | 2 | -0.4713114 | 1.15E-25 | 2.11E-21 | 0.322 | 0.618 |
| SCRG1    | 2 | -0.4716224 | 1.11E-27 | 2.02E-23 | 0.913 | 0.991 |
| EEF1B2   | 2 | -0.4744831 | 3.85E-46 | 7.02E-42 | 0.987 | 0.995 |
| RPS3A    | 2 | -0.4746271 | 3.93E-96 | 7.16E-92 | 1     | 1     |
| JUNB     | 2 | -0.4753528 | 7.47E-25 | 1.36E-20 | 0.481 | 0.788 |
| HMG2     | 2 | -0.4864316 | 5.96E-36 | 1.09E-31 | 0.758 | 0.963 |
| ERGIC3   | 2 | -0.4904538 | 1.30E-34 | 2.37E-30 | 0.612 | 0.865 |
| CTSD     | 2 | -0.5019952 | 2.87E-29 | 5.24E-25 | 0.682 | 0.918 |
| SSR2     | 2 | -0.5033277 | 2.72E-40 | 4.97E-36 | 0.695 | 0.937 |
| MAGED1   | 2 | -0.5036826 | 2.15E-27 | 3.92E-23 | 0.038 | 0.305 |
| TMEM59   | 2 | -0.5041453 | 5.70E-42 | 1.04E-37 | 0.949 | 0.988 |
| ACTG1    | 2 | -0.5050746 | 1.45E-32 | 2.65E-28 | 0.924 | 0.984 |
| MT-ND5   | 2 | -0.5059133 | 2.00E-22 | 3.64E-18 | 0.419 | 0.676 |
| TMED10   | 2 | -0.5105908 | 1.55E-36 | 2.83E-32 | 0.729 | 0.93  |
| INHBA    | 2 | -0.5115048 | 8.56E-32 | 1.56E-27 | 0.14  | 0.499 |
| MFGE8    | 2 | -0.5138684 | 9.05E-30 | 1.65E-25 | 0.608 | 0.883 |
| SSPN     | 2 | -0.5152639 | 1.43E-48 | 2.62E-44 | 0.068 | 0.501 |
| PTRF     | 2 | -0.5154721 | 1.52E-39 | 2.77E-35 | 0.186 | 0.594 |
| FAM46A   | 2 | -0.5173195 | 2.78E-22 | 5.08E-18 | 0.364 | 0.625 |
| CHID1    | 2 | -0.5173334 | 1.81E-37 | 3.30E-33 | 0.244 | 0.634 |
| ITM2B    | 2 | -0.5201782 | 4.02E-37 | 7.34E-33 | 0.917 | 0.986 |
| CXXC5    | 2 | -0.5209299 | 1.23E-49 | 2.24E-45 | 0.068 | 0.51  |
| COL11A2  | 2 | -0.5223327 | 1.64E-35 | 2.99E-31 | 0.218 | 0.601 |
| GSN      | 2 | -0.52268   | 2.76E-39 | 5.04E-35 | 0.227 | 0.632 |
| BSG      | 2 | -0.5227969 | 1.12E-36 | 2.04E-32 | 0.388 | 0.76  |
| YBX1     | 2 | -0.5254782 | 1.77E-57 | 3.23E-53 | 0.958 | 1     |
| SDF4     | 2 | -0.5263715 | 3.12E-38 | 5.70E-34 | 0.379 | 0.755 |
| SH3BGRL  | 2 | -0.5274537 | 2.62E-42 | 4.78E-38 | 0.216 | 0.641 |
| SSR3     | 2 | -0.529007  | 2.93E-41 | 5.35E-37 | 0.752 | 0.953 |
| SPON2    | 2 | -0.5310745 | 1.53E-43 | 2.79E-39 | 0.055 | 0.445 |
| PLXDC2   | 2 | -0.5357911 | 1.44E-38 | 2.62E-34 | 0.256 | 0.655 |
| VCAN     | 2 | -0.537223  | 1.76E-34 | 3.21E-30 | 0.106 | 0.462 |
| NUCB2    | 2 | -0.5387063 | 4.98E-39 | 9.08E-35 | 0.186 | 0.583 |
| SNAI2    | 2 | -0.5401717 | 7.77E-27 | 1.42E-22 | 0.305 | 0.615 |

|         |   |            |          |          |       |       |
|---------|---|------------|----------|----------|-------|-------|
| RPL3    | 2 | -0.5423066 | 1.78E-95 | 3.25E-91 | 1     | 1     |
| BGN     | 2 | -0.5450291 | 1.90E-42 | 3.47E-38 | 0.934 | 0.998 |
| HSP90B1 | 2 | -0.5464909 | 1.82E-27 | 3.32E-23 | 0.608 | 0.834 |
| RPL7    | 2 | -0.5470826 | 3.10E-88 | 5.66E-84 | 1     | 1     |
| EIF4B   | 2 | -0.5472539 | 9.02E-39 | 1.65E-34 | 0.621 | 0.909 |
| TTC3    | 2 | -0.5492188 | 4.54E-37 | 8.29E-33 | 0.403 | 0.765 |
| TPT1    | 2 | -0.5514922 | 1.31E-96 | 2.39E-92 | 1     | 1     |
| FOS     | 2 | -0.5535789 | 6.07E-37 | 1.11E-32 | 0.407 | 0.765 |
| FCGRT   | 2 | -0.5538079 | 2.73E-37 | 4.98E-33 | 0.301 | 0.669 |
| LUM     | 2 | -0.5542566 | 3.04E-33 | 5.54E-29 | 1     | 1     |
| FTL     | 2 | -0.5543044 | 4.17E-70 | 7.60E-66 | 1     | 1     |
| PPIC    | 2 | -0.5570081 | 4.92E-34 | 8.98E-30 | 0.231 | 0.592 |
| SLC14A1 | 2 | -0.5574863 | 5.96E-42 | 1.09E-37 | 0.163 | 0.571 |
| PRDX4   | 2 | -0.55889   | 1.21E-35 | 2.20E-31 | 0.553 | 0.814 |
| PCBP2   | 2 | -0.5590824 | 3.26E-52 | 5.94E-48 | 0.775 | 0.967 |
| SSR4    | 2 | -0.5605316 | 1.40E-44 | 2.55E-40 | 0.888 | 0.986 |
| TSPO    | 2 | -0.5615039 | 1.10E-48 | 2.01E-44 | 0.623 | 0.932 |
| NFIA    | 2 | -0.5626031 | 4.36E-53 | 7.95E-49 | 0.083 | 0.543 |
| MDFI    | 2 | -0.5688353 | 1.20E-36 | 2.20E-32 | 0.248 | 0.625 |
| GAS6    | 2 | -0.5688726 | 8.82E-51 | 1.61E-46 | 0.083 | 0.536 |
| RPLP0   | 2 | -0.5845059 | 2.92E-96 | 5.33E-92 | 1     | 1     |
| DDR2    | 2 | -0.5862848 | 2.52E-42 | 4.60E-38 | 0.195 | 0.604 |
| MIA     | 2 | -0.5869974 | 2.18E-36 | 3.98E-32 | 0.962 | 1     |
| H3F3A   | 2 | -0.5880883 | 3.96E-60 | 7.22E-56 | 0.907 | 0.998 |
| MT-ND4  | 2 | -0.5917959 | 5.14E-45 | 9.38E-41 | 0.953 | 0.988 |
| CYR61   | 2 | -0.5937292 | 4.39E-32 | 8.02E-28 | 0.161 | 0.52  |
| PCOLCE2 | 2 | -0.5938847 | 3.62E-41 | 6.60E-37 | 0.744 | 0.958 |
| S100A4  | 2 | -0.595324  | 3.96E-29 | 7.22E-25 | 0.547 | 0.851 |
| XAGE2   | 2 | -0.5991641 | 2.01E-23 | 3.67E-19 | 0.004 | 0.203 |
| HLA-A   | 2 | -0.6069016 | 9.83E-44 | 1.79E-39 | 0.754 | 0.965 |
| THY1    | 2 | -0.6074341 | 1.97E-42 | 3.60E-38 | 0.138 | 0.545 |
| CHI3L1  | 2 | -0.6090889 | 1.61E-19 | 2.94E-15 | 0.886 | 0.97  |
| PABPC1  | 2 | -0.6121843 | 3.54E-50 | 6.47E-46 | 0.735 | 0.942 |
| BAMBI   | 2 | -0.6163636 | 4.14E-29 | 7.55E-25 | 0.324 | 0.646 |
| ID2     | 2 | -0.6174955 | 4.31E-30 | 7.86E-26 | 0.324 | 0.676 |
| HTRA1   | 2 | -0.6286007 | 7.98E-57 | 1.46E-52 | 0.487 | 0.921 |
| HLA-C   | 2 | -0.6286203 | 5.00E-44 | 9.12E-40 | 0.725 | 0.949 |
| CTSC    | 2 | -0.6294067 | 1.48E-30 | 2.70E-26 | 0.091 | 0.408 |
| EID1    | 2 | -0.6342777 | 1.05E-59 | 1.91E-55 | 0.797 | 0.97  |

|          |   |            |           |           |       |       |
|----------|---|------------|-----------|-----------|-------|-------|
| MSMP     | 2 | -0.6358211 | 5.90E-14  | 1.08E-09  | 0.193 | 0.438 |
| RPL10A   | 2 | -0.6368677 | 1.08E-106 | 1.97E-102 | 1     | 1     |
| RPS8     | 2 | -0.6388557 | 1.53E-112 | 2.79E-108 | 1     | 1     |
| PTMS     | 2 | -0.6413757 | 1.34E-49  | 2.45E-45  | 0.369 | 0.8   |
| SDC2     | 2 | -0.6436141 | 1.58E-50  | 2.89E-46  | 0.54  | 0.911 |
| SOD3     | 2 | -0.6465015 | 1.41E-31  | 2.58E-27  | 0.85  | 0.97  |
| ITM2A    | 2 | -0.6469853 | 2.84E-42  | 5.19E-38  | 0.244 | 0.657 |
| ID4      | 2 | -0.6489073 | 7.46E-39  | 1.36E-34  | 0.278 | 0.674 |
| RPS20    | 2 | -0.6554801 | 2.04E-99  | 3.73E-95  | 1     | 1     |
| NPC2     | 2 | -0.6703496 | 8.88E-75  | 1.62E-70  | 0.936 | 1     |
| PEBP1    | 2 | -0.6774738 | 3.91E-59  | 7.14E-55  | 0.523 | 0.918 |
| EIF3L    | 2 | -0.6817044 | 3.01E-65  | 5.49E-61  | 0.657 | 0.963 |
| CCNI     | 2 | -0.6831833 | 8.16E-84  | 1.49E-79  | 0.981 | 1     |
| TCF4     | 2 | -0.6861296 | 8.88E-52  | 1.62E-47  | 0.186 | 0.648 |
| NNMT     | 2 | -0.6862848 | 9.42E-40  | 1.72E-35  | 0.807 | 0.951 |
| RPS11    | 2 | -0.689535  | 2.10E-98  | 3.82E-94  | 0.985 | 1     |
| VIM      | 2 | -0.692695  | 4.84E-66  | 8.83E-62  | 0.998 | 1     |
| HNRNPA1  | 2 | -0.6942557 | 3.57E-70  | 6.52E-66  | 0.975 | 1     |
| CCDC80   | 2 | -0.7004727 | 2.23E-48  | 4.07E-44  | 0.72  | 0.984 |
| YBX3     | 2 | -0.7043642 | 3.54E-60  | 6.46E-56  | 0.572 | 0.953 |
| CP       | 2 | -0.7130167 | 6.36E-47  | 1.16E-42  | 0.485 | 0.837 |
| MALAT1   | 2 | -0.7140551 | 7.47E-53  | 1.36E-48  | 1     | 1     |
| SLC40A1  | 2 | -0.7209901 | 3.19E-63  | 5.83E-59  | 0.036 | 0.531 |
| SERPINA5 | 2 | -0.7280979 | 1.14E-59  | 2.07E-55  | 0.189 | 0.692 |
| IGFBP6   | 2 | -0.7316481 | 1.31E-29  | 2.40E-25  | 0.39  | 0.706 |
| RPL4     | 2 | -0.7323325 | 4.24E-99  | 7.74E-95  | 0.996 | 1     |
| IGFBP7   | 2 | -0.7377807 | 2.61E-49  | 4.76E-45  | 0.585 | 0.937 |
| CD9      | 2 | -0.742956  | 2.19E-56  | 4.00E-52  | 0.261 | 0.744 |
| EIF3H    | 2 | -0.7444079 | 1.01E-88  | 1.84E-84  | 0.947 | 1     |
| FGFBP2   | 2 | -0.7479289 | 1.25E-29  | 2.28E-25  | 0.883 | 0.981 |
| PDIA6    | 2 | -0.7537251 | 4.82E-58  | 8.79E-54  | 0.35  | 0.809 |
| RHOBTB3  | 2 | -0.7613097 | 3.02E-57  | 5.52E-53  | 0.307 | 0.774 |
| CITED2   | 2 | -0.7796683 | 2.70E-52  | 4.93E-48  | 0.138 | 0.599 |
| GPX3     | 2 | -0.786684  | 5.25E-63  | 9.58E-59  | 0.841 | 0.995 |
| FXYP6    | 2 | -0.7897604 | 1.22E-72  | 2.22E-68  | 0.498 | 0.93  |
| CRTAP    | 2 | -0.7945115 | 3.09E-74  | 5.64E-70  | 0.405 | 0.883 |
| FTH1     | 2 | -0.7999439 | 2.52E-85  | 4.60E-81  | 1     | 1     |
| CRISPLD1 | 2 | -0.8083897 | 6.22E-53  | 1.13E-48  | 0.011 | 0.427 |
| COL11A1  | 2 | -0.8153526 | 3.10E-67  | 5.66E-63  | 0.297 | 0.841 |

|         |   |            |           |           |       |       |
|---------|---|------------|-----------|-----------|-------|-------|
| MT-CO1  | 2 | -0.8189419 | 4.27E-63  | 7.80E-59  | 0.956 | 0.993 |
| ZFP36L2 | 2 | -0.8247092 | 1.78E-48  | 3.24E-44  | 0.121 | 0.557 |
| CEBPD   | 2 | -0.8261817 | 2.52E-52  | 4.59E-48  | 0.619 | 0.911 |
| FBXO2   | 2 | -0.829392  | 9.62E-77  | 1.76E-72  | 0.426 | 0.902 |
| ID1     | 2 | -0.8597808 | 2.58E-40  | 4.70E-36  | 0.347 | 0.753 |
| CST3    | 2 | -0.8627552 | 2.12E-82  | 3.87E-78  | 0.947 | 0.998 |
| MT-CO3  | 2 | -0.8629122 | 3.14E-68  | 5.72E-64  | 0.871 | 0.981 |
| PRELP   | 2 | -0.8653003 | 2.79E-68  | 5.08E-64  | 0.771 | 0.998 |
| ITM2C   | 2 | -0.8677685 | 6.87E-75  | 1.25E-70  | 0.155 | 0.727 |
| APOD    | 2 | -0.8696105 | 1.44E-44  | 2.63E-40  | 0.174 | 0.594 |
| MT-CO2  | 2 | -0.8904597 | 5.65E-70  | 1.03E-65  | 0.919 | 0.993 |
| NGFRAP1 | 2 | -0.8916276 | 1.93E-80  | 3.52E-76  | 0.572 | 0.956 |
| ISLR    | 2 | -0.9021026 | 2.77E-86  | 5.06E-82  | 0.07  | 0.697 |
| SPARC   | 2 | -0.9025892 | 5.56E-70  | 1.01E-65  | 0.195 | 0.758 |
| CD99    | 2 | -0.9140385 | 2.34E-90  | 4.26E-86  | 0.727 | 0.984 |
| MT-ND1  | 2 | -0.9177936 | 1.33E-63  | 2.43E-59  | 0.419 | 0.869 |
| FMOD    | 2 | -0.9243699 | 2.45E-83  | 4.47E-79  | 0.627 | 0.979 |
| EEF2    | 2 | -0.9256302 | 3.39E-89  | 6.19E-85  | 0.962 | 0.998 |
| S100B   | 2 | -0.9377389 | 4.73E-75  | 8.63E-71  | 0.436 | 0.925 |
| EEF1A1  | 2 | -0.9435162 | 1.64E-134 | 2.99E-130 | 1     | 1     |
| MT-ND3  | 2 | -0.9480462 | 1.35E-70  | 2.46E-66  | 0.485 | 0.925 |
| P4HB    | 2 | -0.9545927 | 9.39E-86  | 1.71E-81  | 0.508 | 0.967 |
| MGP     | 2 | -0.9731874 | 4.51E-61  | 8.23E-57  | 0.989 | 1     |
| DCN     | 2 | -0.9742361 | 3.68E-97  | 6.72E-93  | 1     | 1     |
| MT-ATP6 | 2 | -1.0101585 | 1.39E-76  | 2.54E-72  | 0.71  | 0.97  |
| C2orf40 | 2 | -1.0217513 | 4.33E-73  | 7.90E-69  | 0.928 | 1     |
| MT-ND2  | 2 | -1.022607  | 9.24E-74  | 1.69E-69  | 0.411 | 0.9   |
| RBP4    | 2 | -1.0271132 | 3.61E-72  | 6.59E-68  | 0.413 | 0.893 |
| MT-CYB  | 2 | -1.0337917 | 4.53E-74  | 8.27E-70  | 0.508 | 0.937 |
| ACAN    | 2 | -1.0780419 | 8.75E-99  | 1.60E-94  | 0.752 | 0.998 |
| NEAT1   | 2 | -1.0861065 | 3.07E-94  | 5.60E-90  | 0.972 | 1     |
| B2M     | 2 | -1.0916728 | 2.02E-110 | 3.68E-106 | 0.96  | 1     |
| PAX1    | 2 | -1.1116513 | 4.38E-101 | 8.00E-97  | 0.28  | 0.9   |
| TSC22D1 | 2 | -1.1474929 | 1.08E-61  | 1.98E-57  | 0.5   | 0.9   |
| COL9A3  | 2 | -1.1539568 | 2.29E-77  | 4.18E-73  | 0.227 | 0.816 |
| ADIRF   | 2 | -1.1560581 | 7.92E-84  | 1.45E-79  | 0.244 | 0.851 |
| ID3     | 2 | -1.1776362 | 9.92E-74  | 1.81E-69  | 0.214 | 0.788 |
| PLAC9   | 2 | -1.302882  | 3.14E-105 | 5.72E-101 | 0.511 | 0.981 |
| CAPS    | 2 | -1.3443426 | 2.25E-99  | 4.11E-95  | 0.468 | 0.96  |

| LECT1     | 2       | -1.3599112 | 6.65E-99  | 1.21E-94  | 0.394 | 0.953 |
|-----------|---------|------------|-----------|-----------|-------|-------|
| C2orf82   | 2       | -1.3790356 | 1.93E-97  | 3.52E-93  | 0.953 | 0.998 |
| SPTSSB    | 2       | -1.5169783 | 9.85E-100 | 1.80E-95  | 0.021 | 0.706 |
| COL2A1    | 2       | -1.5741714 | 5.18E-103 | 9.45E-99  | 0.254 | 0.921 |
| FRZB      | 2       | -1.582901  | 1.02E-67  | 1.85E-63  | 0.233 | 0.779 |
| SLPI      | 2       | -1.7245219 | 1.42E-66  | 2.60E-62  | 0.824 | 1     |
| OGN       | 2       | -1.8141119 | 2.47E-117 | 4.51E-113 | 0.606 | 0.995 |
| CLEC3A    | 2       | -1.9338016 | 1.90E-136 | 3.46E-132 | 0.112 | 0.939 |
| gene      | cluster | avg_logFC  | p_val     | p_val_adj | pct.1 | pct.2 |
| SPP1      | 3       | 2.66044525 | 2.21E-72  | 4.03E-68  | 0.86  | 0.157 |
| PRG4      | 3       | 2.29986475 | 6.25E-68  | 1.14E-63  | 0.722 | 0.045 |
| CTSL      | 3       | 1.46477471 | 1.96E-58  | 3.57E-54  | 0.874 | 0.422 |
| IGFBP3    | 3       | 1.31031804 | 1.75E-52  | 3.20E-48  | 0.625 | 0.052 |
| UPP1      | 3       | 1.2980046  | 5.92E-77  | 1.08E-72  | 0.853 | 0.185 |
| PTGS2     | 3       | 1.22097911 | 9.62E-59  | 1.76E-54  | 0.736 | 0.132 |
| MT2A      | 3       | 1.22090635 | 3.23E-68  | 5.90E-64  | 1     | 1     |
| HMGA1     | 3       | 1.22059159 | 2.68E-53  | 4.89E-49  | 0.838 | 0.408 |
| CCL20     | 3       | 1.19956526 | 1.25E-15  | 2.29E-11  | 0.268 | 0.035 |
| C11orf96  | 3       | 1.09283593 | 6.57E-52  | 1.20E-47  | 0.684 | 0.105 |
| BMP2      | 3       | 1.08187066 | 8.32E-51  | 1.52E-46  | 0.691 | 0.118 |
| NRP2      | 3       | 1.00510517 | 1.14E-37  | 2.09E-33  | 0.679 | 0.247 |
| TIMP1     | 3       | 0.99727054 | 1.96E-09  | 3.58E-05  | 0.993 | 0.986 |
| VEGFA     | 3       | 0.99680184 | 3.53E-52  | 6.45E-48  | 0.827 | 0.366 |
| CXCL8     | 3       | 0.97246262 | 4.93E-27  | 9.00E-23  | 0.409 | 0.042 |
| WTAP      | 3       | 0.95464659 | 3.62E-44  | 6.61E-40  | 0.971 | 0.774 |
| TFPI2     | 3       | 0.9308656  | 3.19E-19  | 5.82E-15  | 0.276 | 0.017 |
| ERO1A     | 3       | 0.90271578 | 1.22E-54  | 2.22E-50  | 0.798 | 0.275 |
| COMP      | 3       | 0.90119392 | 2.32E-21  | 4.23E-17  | 0.929 | 0.798 |
| CD55      | 3       | 0.89700532 | 3.47E-47  | 6.34E-43  | 0.919 | 0.54  |
| G0S2      | 3       | 0.88151081 | 1.00E-11  | 1.83E-07  | 0.496 | 0.272 |
| STK17A    | 3       | 0.87576874 | 2.66E-48  | 4.85E-44  | 0.701 | 0.181 |
| MRPS6     | 3       | 0.84994541 | 3.32E-40  | 6.06E-36  | 0.967 | 0.878 |
| TREM1     | 3       | 0.83524471 | 5.29E-51  | 9.64E-47  | 0.584 | 0.021 |
| MIF       | 3       | 0.83445529 | 2.30E-77  | 4.19E-73  | 1     | 0.997 |
| CCDC85B   | 3       | 0.82936925 | 3.84E-34  | 7.00E-30  | 0.895 | 0.666 |
| RABGGTB   | 3       | 0.81528541 | 2.28E-53  | 4.15E-49  | 0.874 | 0.509 |
| S100A2    | 3       | 0.81178566 | 1.90E-26  | 3.46E-22  | 0.646 | 0.293 |
| C15orf48  | 3       | 0.79921955 | 2.08E-28  | 3.80E-24  | 0.615 | 0.185 |
| TNFRSF12A | 3       | 0.79119993 | 5.63E-38  | 1.03E-33  | 0.698 | 0.24  |

|          |   |            |          |          |       |       |
|----------|---|------------|----------|----------|-------|-------|
| TM4SF1   | 3 | 0.7791973  | 3.25E-17 | 5.93E-13 | 0.734 | 0.516 |
| TIMP3    | 3 | 0.77549194 | 3.98E-22 | 7.27E-18 | 0.67  | 0.362 |
| SLC7A2   | 3 | 0.77495877 | 1.50E-36 | 2.74E-32 | 0.698 | 0.223 |
| HILPDA   | 3 | 0.71487773 | 1.14E-17 | 2.09E-13 | 0.686 | 0.439 |
| SNHG12   | 3 | 0.70895909 | 2.10E-34 | 3.84E-30 | 0.634 | 0.206 |
| MT1X     | 3 | 0.69126756 | 1.58E-23 | 2.89E-19 | 1     | 1     |
| SMOX     | 3 | 0.68998259 | 1.09E-23 | 1.99E-19 | 0.561 | 0.223 |
| GSTO1    | 3 | 0.67868694 | 1.17E-37 | 2.13E-33 | 0.891 | 0.672 |
| SLC2A1   | 3 | 0.67316553 | 8.79E-29 | 1.60E-24 | 0.527 | 0.146 |
| PMP22    | 3 | 0.66887173 | 3.87E-36 | 7.05E-32 | 0.912 | 0.666 |
| BZW1     | 3 | 0.66344628 | 3.20E-29 | 5.83E-25 | 0.836 | 0.554 |
| BHLHE40  | 3 | 0.65181164 | 5.32E-25 | 9.70E-21 | 0.627 | 0.272 |
| NDRG1    | 3 | 0.62543552 | 4.42E-33 | 8.06E-29 | 0.772 | 0.404 |
| SLC3A2   | 3 | 0.61479648 | 4.90E-23 | 8.95E-19 | 0.532 | 0.202 |
| PHLDA1   | 3 | 0.60964096 | 2.15E-24 | 3.92E-20 | 0.439 | 0.091 |
| PPP1R15A | 3 | 0.60459908 | 3.06E-26 | 5.59E-22 | 0.615 | 0.261 |
| PPP3CA   | 3 | 0.59538242 | 1.22E-20 | 2.22E-16 | 0.869 | 0.655 |
| HMGA2    | 3 | 0.5934033  | 7.68E-40 | 1.40E-35 | 0.487 | 0.021 |
| ARF6     | 3 | 0.59092094 | 2.78E-32 | 5.07E-28 | 0.777 | 0.425 |
| DNAJB9   | 3 | 0.5835939  | 5.06E-24 | 9.23E-20 | 0.81  | 0.568 |
| IER3     | 3 | 0.58345664 | 8.43E-18 | 1.54E-13 | 0.691 | 0.362 |
| PPP1CB   | 3 | 0.58294294 | 1.49E-22 | 2.72E-18 | 0.862 | 0.631 |
| CCND1    | 3 | 0.58220871 | 3.44E-25 | 6.28E-21 | 0.513 | 0.153 |
| ENO2     | 3 | 0.57890853 | 8.37E-28 | 1.53E-23 | 0.603 | 0.233 |
| PGK1     | 3 | 0.57781983 | 9.54E-22 | 1.74E-17 | 0.905 | 0.76  |
| TFPI     | 3 | 0.57334653 | 5.17E-27 | 9.43E-23 | 0.449 | 0.08  |
| VAPA     | 3 | 0.57201427 | 7.52E-33 | 1.37E-28 | 0.969 | 0.847 |
| SELK     | 3 | 0.56550202 | 7.75E-32 | 1.41E-27 | 0.936 | 0.763 |
| PLAUR    | 3 | 0.5623788  | 2.65E-26 | 4.84E-22 | 0.594 | 0.23  |
| CLEC2B   | 3 | 0.55400357 | 5.95E-12 | 1.09E-07 | 0.378 | 0.153 |
| RELB     | 3 | 0.54680296 | 1.57E-25 | 2.87E-21 | 0.613 | 0.258 |
| SGIP1    | 3 | 0.53246649 | 1.74E-28 | 3.17E-24 | 0.401 | 0.035 |
| EIF4A2   | 3 | 0.53065188 | 1.54E-37 | 2.81E-33 | 0.998 | 0.962 |
| TMEM38B  | 3 | 0.52706107 | 3.33E-25 | 6.08E-21 | 0.708 | 0.39  |
| SLC5A3   | 3 | 0.52612869 | 5.13E-15 | 9.36E-11 | 0.632 | 0.376 |
| MGST1    | 3 | 0.5223596  | 5.50E-17 | 1.00E-12 | 0.563 | 0.279 |
| CTHRC1   | 3 | 0.517342   | 1.62E-19 | 2.95E-15 | 0.375 | 0.08  |
| ISG20    | 3 | 0.51518324 | 1.21E-21 | 2.20E-17 | 0.694 | 0.404 |
| RND3     | 3 | 0.51219049 | 2.29E-17 | 4.17E-13 | 0.366 | 0.091 |

|            |   |            |          |            |       |       |
|------------|---|------------|----------|------------|-------|-------|
| ARPP19     | 3 | 0.50035029 | 1.90E-20 | 3.47E-16   | 0.66  | 0.425 |
| GBE1       | 3 | 0.49923856 | 8.18E-17 | 1.49E-12   | 0.658 | 0.443 |
| SOD2       | 3 | 0.49760328 | 1.06E-23 | 1.94E-19   | 1     | 0.993 |
| SPRY2      | 3 | 0.49579545 | 1.49E-27 | 2.72E-23   | 0.444 | 0.07  |
| CTNNB1     | 3 | 0.49473067 | 8.65E-12 | 1.58E-07   | 0.537 | 0.314 |
| TMSB10     | 3 | 0.48098228 | 2.73E-21 | 4.98E-17   | 0.998 | 0.99  |
| CSGALNACT2 | 3 | 0.4798956  | 4.36E-23 | 7.96E-19   | 0.461 | 0.122 |
| EIF1       | 3 | 0.47723869 | 3.49E-44 | 6.37E-40   | 1     | 1     |
| BCL2A1     | 3 | 0.47651445 | 1.82E-24 | 3.32E-20   | 0.302 | 0     |
| GOLT1B     | 3 | 0.47429961 | 3.73E-22 | 6.80E-18   | 0.565 | 0.237 |
| TRMT112    | 3 | 0.47073455 | 5.06E-25 | 9.23E-21   | 0.943 | 0.829 |
| SERPINE2   | 3 | 0.46917071 | 6.97E-15 | 1.27E-10   | 1     | 0.99  |
| IL11       | 3 | 0.46116661 | 4.12E-13 | 7.53E-09   | 0.173 | 0.003 |
| RNF114     | 3 | 0.46038076 | 8.70E-16 | 1.59E-11   | 0.663 | 0.446 |
| HLA-DRB1   | 3 | 0.46000988 | 1.03E-18 | 1.87E-14   | 0.485 | 0.188 |
| ATP6V1G1   | 3 | 0.45990545 | 1.75E-22 | 3.20E-18   | 0.979 | 0.958 |
| TNFAIP6    | 3 | 0.45989915 | 2.04E-18 | 3.72E-14   | 0.287 | 0.028 |
| COX17      | 3 | 0.45925127 | 8.47E-25 | 1.55E-20   | 0.895 | 0.697 |
| FOSL1      | 3 | 0.45615284 | 6.54E-24 | 1.19E-19   | 0.378 | 0.045 |
| ABI3BP     | 3 | 0.45355813 | 1.25E-11 | 2.27E-07   | 0.546 | 0.341 |
| ENO1       | 3 | 0.45080601 | 2.80E-14 | 5.10E-10   | 0.969 | 0.93  |
| DDIT3      | 3 | 0.43992773 | 2.36E-16 | 4.30E-12   | 0.568 | 0.293 |
| RNF145     | 3 | 0.43920829 | 2.27E-15 | 4.14E-11   | 0.511 | 0.244 |
| FAM162A    | 3 | 0.4387719  | 1.05E-17 | 1.91E-13   | 0.884 | 0.749 |
| PTP4A1     | 3 | 0.43865861 | 4.21E-16 | 7.68E-12   | 0.544 | 0.279 |
| ARF4       | 3 | 0.43580428 | 1.85E-15 | 3.38E-11   | 0.786 | 0.589 |
| SLC25A37   | 3 | 0.43570675 | 4.56E-23 | 8.32E-19   | 0.971 | 0.843 |
| NT5E       | 3 | 0.4277796  | 6.26E-14 | 1.14E-09   | 0.537 | 0.293 |
| TGFBI      | 3 | 0.42052124 | 3.07E-15 | 5.60E-11   | 0.42  | 0.164 |
| PPP1R14C   | 3 | 0.41975914 | 1.16E-24 | 2.11E-20   | 0.401 | 0.059 |
| ZNF593     | 3 | 0.41877422 | 3.71E-20 | 6.78E-16   | 0.634 | 0.314 |
| RIPK2      | 3 | 0.41492595 | 1.28E-20 | 2.34E-16   | 0.489 | 0.167 |
| TMEM45A    | 3 | 0.41449919 | 2.60E-10 | 4.75E-06   | 0.805 | 0.7   |
| BTG3       | 3 | 0.41339986 | 1.86E-18 | 3.40E-14   | 0.513 | 0.209 |
| PFDN2      | 3 | 0.40966405 | 2.84E-19 | 5.18E-15   | 0.698 | 0.425 |
| DDIT4L     | 3 | 0.4087314  | 1.91E-11 | 3.48E-07   | 0.817 | 0.652 |
| TGM2       | 3 | 0.4050828  | 7.25E-19 | 1.32E-14   | 0.62  | 0.314 |
| FAP        | 3 | 0.40502784 | 7.03E-20 | 1.28E-15   | 0.435 | 0.122 |
| DNAJB1     | 3 | 0.40327319 | 1.04E-08 | 0.00019031 | 0.399 | 0.216 |



|          |   |            |          |            |       |       |
|----------|---|------------|----------|------------|-------|-------|
| VIMP     | 3 | 0.40202407 | 2.07E-14 | 3.78E-10   | 0.803 | 0.617 |
| NRN1     | 3 | 0.40197895 | 1.26E-09 | 2.30E-05   | 0.601 | 0.394 |
| SEC61G   | 3 | 0.40194601 | 1.61E-18 | 2.94E-14   | 0.998 | 0.99  |
| GRB10    | 3 | 0.40156376 | 4.77E-22 | 8.70E-18   | 0.306 | 0.017 |
| TVP23B   | 3 | 0.40132466 | 2.63E-16 | 4.80E-12   | 0.518 | 0.244 |
| VDAC1    | 3 | 0.40006698 | 5.23E-17 | 9.54E-13   | 0.881 | 0.735 |
| EIF1B    | 3 | 0.39549032 | 3.25E-17 | 5.93E-13   | 0.803 | 0.617 |
| PTGES3   | 3 | 0.38903791 | 2.58E-20 | 4.71E-16   | 0.964 | 0.892 |
| PPFIBP1  | 3 | 0.38712257 | 1.18E-13 | 2.15E-09   | 0.615 | 0.408 |
| TNFAIP8  | 3 | 0.38590988 | 7.47E-18 | 1.36E-13   | 0.382 | 0.098 |
| DNER     | 3 | 0.38508701 | 4.67E-13 | 8.52E-09   | 0.705 | 0.502 |
| SERPINE1 | 3 | 0.38231722 | 1.49E-16 | 2.71E-12   | 0.29  | 0.045 |
| CGGBP1   | 3 | 0.38132588 | 1.73E-14 | 3.15E-10   | 0.568 | 0.328 |
| IL32     | 3 | 0.37794722 | 1.14E-16 | 2.08E-12   | 0.496 | 0.192 |
| BAALC    | 3 | 0.37400189 | 1.20E-07 | 0.00218466 | 0.556 | 0.436 |
| GJA1     | 3 | 0.3728525  | 2.58E-19 | 4.71E-15   | 0.387 | 0.091 |
| CRLF1    | 3 | 0.37227941 | 6.80E-15 | 1.24E-10   | 0.347 | 0.098 |
| MMP14    | 3 | 0.37216798 | 3.90E-21 | 7.11E-17   | 0.363 | 0.059 |
| C11orf31 | 3 | 0.37121519 | 1.28E-15 | 2.33E-11   | 0.805 | 0.638 |
| PLCG2    | 3 | 0.37120729 | 3.16E-12 | 5.76E-08   | 0.238 | 0.045 |
| SMS      | 3 | 0.36972952 | 9.10E-11 | 1.66E-06   | 0.672 | 0.516 |
| EVI2A    | 3 | 0.36297961 | 4.67E-17 | 8.52E-13   | 0.437 | 0.146 |
| TYMP     | 3 | 0.36066596 | 9.22E-13 | 1.68E-08   | 0.639 | 0.401 |
| PPDPF    | 3 | 0.35955272 | 3.12E-18 | 5.69E-14   | 1     | 1     |
| SPHK1    | 3 | 0.35651658 | 4.49E-18 | 8.19E-14   | 0.375 | 0.091 |
| PLOD2    | 3 | 0.35582983 | 2.26E-13 | 4.13E-09   | 0.812 | 0.638 |
| ADSS     | 3 | 0.35557944 | 7.62E-10 | 1.39E-05   | 0.599 | 0.439 |
| CRTAC1   | 3 | 0.35479984 | 5.13E-12 | 9.36E-08   | 0.454 | 0.216 |
| WDR45B   | 3 | 0.35292161 | 5.87E-15 | 1.07E-10   | 0.439 | 0.178 |
| AKAP12   | 3 | 0.35255618 | 8.57E-15 | 1.56E-10   | 0.259 | 0.038 |
| COX7A2   | 3 | 0.35214992 | 2.62E-21 | 4.78E-17   | 0.988 | 0.958 |
| WDR33    | 3 | 0.35185429 | 3.53E-10 | 6.45E-06   | 0.492 | 0.307 |
| CLDND1   | 3 | 0.35113347 | 5.64E-16 | 1.03E-11   | 0.558 | 0.293 |
| KDM7A    | 3 | 0.34249573 | 3.35E-15 | 6.11E-11   | 0.418 | 0.157 |
| ANXA5    | 3 | 0.34223949 | 2.28E-16 | 4.17E-12   | 0.91  | 0.77  |
| CD44     | 3 | 0.3405074  | 8.69E-16 | 1.59E-11   | 0.979 | 0.829 |
| EMP3     | 3 | 0.3404001  | 5.87E-10 | 1.07E-05   | 0.919 | 0.826 |
| NBPF14   | 3 | 0.33807953 | 3.34E-15 | 6.10E-11   | 0.352 | 0.101 |
| ERRFI1   | 3 | 0.33480587 | 1.96E-08 | 0.0003585  | 0.439 | 0.254 |

|              |   |            |          |            |       |       |
|--------------|---|------------|----------|------------|-------|-------|
| FN1          | 3 | 0.33325342 | 1.92E-10 | 3.51E-06   | 0.995 | 1     |
| AK2          | 3 | 0.33281124 | 9.32E-08 | 0.00170043 | 0.708 | 0.596 |
| SNRNP27      | 3 | 0.33097204 | 5.68E-11 | 1.04E-06   | 0.537 | 0.331 |
| FNIP2        | 3 | 0.33015402 | 2.03E-12 | 3.70E-08   | 0.587 | 0.345 |
| CHMP5        | 3 | 0.33011797 | 1.23E-13 | 2.24E-09   | 0.71  | 0.498 |
| GPRC5A       | 3 | 0.32688108 | 1.15E-14 | 2.10E-10   | 0.363 | 0.111 |
| SFT2D1       | 3 | 0.32540019 | 3.38E-13 | 6.18E-09   | 0.793 | 0.659 |
| CA9          | 3 | 0.32517136 | 1.25E-10 | 2.28E-06   | 0.318 | 0.118 |
| LRRFIP1      | 3 | 0.32510435 | 1.28E-10 | 2.33E-06   | 0.561 | 0.362 |
| ATP6V0B      | 3 | 0.32257534 | 1.85E-11 | 3.37E-07   | 0.646 | 0.456 |
| CLK1         | 3 | 0.32195973 | 1.94E-09 | 3.54E-05   | 0.596 | 0.432 |
| ACTR10       | 3 | 0.31813772 | 1.34E-14 | 2.44E-10   | 0.504 | 0.233 |
| CTD-2095E4.5 | 3 | 0.3148236  | 6.67E-09 | 0.00012164 | 0.242 | 0.08  |
| HSPA5        | 3 | 0.3124267  | 2.09E-06 | 0.03821286 | 0.437 | 0.282 |
| MED21        | 3 | 0.30999656 | 5.92E-08 | 0.00108076 | 0.527 | 0.362 |
| ISG15        | 3 | 0.308408   | 1.94E-07 | 0.00354406 | 0.24  | 0.091 |
| NPR3         | 3 | 0.30825288 | 2.44E-16 | 4.44E-12   | 0.207 | 0     |
| FERMT2       | 3 | 0.30600985 | 2.76E-11 | 5.03E-07   | 0.489 | 0.265 |
| SH3BP5       | 3 | 0.30598854 | 1.21E-09 | 2.21E-05   | 0.447 | 0.244 |
| CAPZA2       | 3 | 0.30565439 | 5.29E-11 | 9.65E-07   | 0.76  | 0.61  |
| KLHL21       | 3 | 0.30539885 | 9.72E-15 | 1.77E-10   | 0.385 | 0.129 |
| TNS1         | 3 | 0.3022983  | 1.28E-12 | 2.34E-08   | 0.361 | 0.132 |
| AC090498.1   | 3 | 0.30083779 | 4.38E-29 | 8.00E-25   | 1     | 1     |
| PHLDA2       | 3 | 0.30042711 | 1.78E-11 | 3.24E-07   | 0.297 | 0.094 |
| SAR1A        | 3 | 0.29971663 | 4.90E-10 | 8.94E-06   | 0.594 | 0.411 |
| LTBP1        | 3 | 0.29810177 | 9.97E-18 | 1.82E-13   | 0.283 | 0.031 |
| MSANTD3      | 3 | 0.29723948 | 3.54E-11 | 6.46E-07   | 0.439 | 0.223 |
| XBP1         | 3 | 0.29550973 | 2.34E-07 | 0.00427682 | 0.705 | 0.589 |
| DDX21        | 3 | 0.293879   | 2.09E-12 | 3.82E-08   | 0.406 | 0.171 |
| RGCC         | 3 | 0.29373604 | 7.90E-07 | 0.01442048 | 0.862 | 0.77  |
| BET1         | 3 | 0.29265509 | 1.36E-12 | 2.49E-08   | 0.439 | 0.199 |
| ZFAND5       | 3 | 0.29033737 | 4.96E-07 | 0.00905308 | 0.629 | 0.484 |
| C2orf49      | 3 | 0.29022406 | 4.45E-11 | 8.12E-07   | 0.366 | 0.153 |
| OVOS2        | 3 | 0.28955789 | 8.68E-10 | 1.58E-05   | 0.285 | 0.098 |
| MRPL57       | 3 | 0.28940993 | 1.52E-09 | 2.77E-05   | 0.805 | 0.672 |
| ATP6V1C1     | 3 | 0.28894315 | 2.20E-12 | 4.01E-08   | 0.461 | 0.226 |
| MOB4         | 3 | 0.28858247 | 2.45E-11 | 4.48E-07   | 0.437 | 0.209 |
| NDUFB8       | 3 | 0.2884155  | 9.22E-09 | 0.00016821 | 0.831 | 0.753 |
| S100A16      | 3 | 0.28690085 | 7.65E-07 | 0.01395984 | 0.515 | 0.38  |

|           |   |            |          |            |       |       |
|-----------|---|------------|----------|------------|-------|-------|
| LINC00493 | 3 | 0.28566446 | 3.65E-12 | 6.65E-08   | 0.872 | 0.749 |
| CLMP      | 3 | 0.28526803 | 2.34E-12 | 4.26E-08   | 0.418 | 0.178 |
| BNIP3     | 3 | 0.28448099 | 4.83E-10 | 8.82E-06   | 0.995 | 0.958 |
| PTX3      | 3 | 0.28279374 | 7.75E-09 | 0.00014143 | 0.283 | 0.105 |
| RHOD      | 3 | 0.27991911 | 8.55E-10 | 1.56E-05   | 0.525 | 0.324 |
| RHEB      | 3 | 0.27828981 | 6.47E-09 | 0.00011806 | 0.853 | 0.756 |
| KMT2E-AS1 | 3 | 0.27709886 | 4.31E-11 | 7.86E-07   | 0.261 | 0.07  |
| LINC00152 | 3 | 0.27664097 | 1.65E-06 | 0.03003806 | 0.444 | 0.286 |
| METAP2    | 3 | 0.27577118 | 4.90E-11 | 8.95E-07   | 0.831 | 0.631 |
| PTGES     | 3 | 0.27553868 | 1.02E-12 | 1.85E-08   | 0.28  | 0.066 |
| SQSTM1    | 3 | 0.2754133  | 1.22E-07 | 0.00222792 | 0.943 | 0.93  |
| C4orf48   | 3 | 0.27469162 | 8.35E-10 | 1.52E-05   | 0.511 | 0.286 |
| EIF5      | 3 | 0.27405454 | 6.33E-09 | 0.00011544 | 0.743 | 0.603 |
| CNIH1     | 3 | 0.27175763 | 2.82E-09 | 5.14E-05   | 0.86  | 0.728 |
| PHF1      | 3 | 0.27027321 | 1.64E-09 | 3.00E-05   | 0.513 | 0.31  |
| NOL7      | 3 | 0.26953717 | 6.02E-08 | 0.0010988  | 0.653 | 0.54  |
| USMG5     | 3 | 0.26903352 | 5.46E-12 | 9.97E-08   | 0.96  | 0.899 |
| GPX1      | 3 | 0.26739325 | 2.54E-07 | 0.00463165 | 0.924 | 0.882 |
| GNPNAT1   | 3 | 0.26687214 | 8.69E-15 | 1.59E-10   | 0.314 | 0.073 |
| NTMT1     | 3 | 0.26459491 | 1.73E-10 | 3.16E-06   | 0.489 | 0.282 |
| HNRNPDL   | 3 | 0.26281126 | 2.51E-09 | 4.57E-05   | 0.853 | 0.707 |
| SLC20A1   | 3 | 0.26193927 | 2.13E-06 | 0.03878945 | 0.316 | 0.171 |
| ZFYVE16   | 3 | 0.26088686 | 9.33E-14 | 1.70E-09   | 0.318 | 0.084 |
| QSOX1     | 3 | 0.26086387 | 3.37E-08 | 0.00061493 | 0.409 | 0.226 |
| PDE4B     | 3 | 0.26070292 | 2.74E-10 | 5.00E-06   | 0.549 | 0.314 |
| CCDC59    | 3 | 0.26001819 | 2.11E-07 | 0.00384969 | 0.485 | 0.317 |
| NDUFC1    | 3 | 0.25745405 | 2.38E-10 | 4.34E-06   | 0.9   | 0.787 |
| CLDN12    | 3 | 0.25678487 | 1.27E-10 | 2.32E-06   | 0.428 | 0.206 |
| SAP18     | 3 | 0.25626896 | 5.31E-09 | 9.70E-05   | 0.86  | 0.774 |
| ACKR3     | 3 | 0.25419172 | 2.48E-15 | 4.53E-11   | 0.283 | 0.045 |
| SYF2      | 3 | 0.25407577 | 2.20E-09 | 4.02E-05   | 0.898 | 0.78  |
| ZNF581    | 3 | 0.25253951 | 1.07E-08 | 0.0001959  | 0.496 | 0.31  |
| TRAM1     | 3 | 0.25178283 | 4.71E-07 | 0.0085939  | 0.834 | 0.725 |
| FAM96B    | 3 | 0.25176093 | 4.75E-08 | 0.00086721 | 0.76  | 0.669 |
| C16orf13  | 3 | 0.25125211 | 3.90E-08 | 0.00071172 | 0.793 | 0.683 |
| NAA38     | 3 | -0.2510091 | 9.22E-10 | 1.68E-05   | 0.444 | 0.659 |
| COX7A2L   | 3 | -0.2513472 | 8.34E-11 | 1.52E-06   | 0.836 | 0.923 |
| ZFP36     | 3 | -0.2528146 | 1.73E-07 | 0.00315729 | 0.126 | 0.279 |
| RPL21     | 3 | -0.2529971 | 5.47E-34 | 9.97E-30   | 1     | 1     |

|         |   |            |          |            |       |       |
|---------|---|------------|----------|------------|-------|-------|
| BHLHE41 | 3 | -0.2531549 | 2.69E-11 | 4.91E-07   | 0.124 | 0.324 |
| PNKD    | 3 | -0.2535954 | 1.69E-14 | 3.08E-10   | 0.171 | 0.429 |
| HERPUD1 | 3 | -0.2538816 | 1.03E-09 | 1.89E-05   | 0.309 | 0.519 |
| CHID1   | 3 | -0.2552393 | 4.26E-09 | 7.78E-05   | 0.299 | 0.488 |
| SLC29A1 | 3 | -0.2553172 | 2.51E-11 | 4.58E-07   | 0.204 | 0.425 |
| NFIC    | 3 | -0.2556373 | 2.26E-10 | 4.13E-06   | 0.271 | 0.491 |
| TUBB    | 3 | -0.2559484 | 4.48E-08 | 0.000818   | 0.691 | 0.847 |
| TMEM14C | 3 | -0.2562904 | 1.96E-11 | 3.58E-07   | 0.475 | 0.711 |
| COL5A2  | 3 | -0.2563989 | 8.17E-13 | 1.49E-08   | 0.093 | 0.296 |
| COL11A2 | 3 | -0.2564508 | 2.92E-10 | 5.33E-06   | 0.19  | 0.394 |
| RPL27   | 3 | -0.2564815 | 1.48E-24 | 2.70E-20   | 1     | 1     |
| MPP6    | 3 | -0.2571708 | 5.42E-11 | 9.90E-07   | 0.154 | 0.355 |
| VAMP5   | 3 | -0.2572094 | 9.70E-09 | 0.00017694 | 0.328 | 0.516 |
| ATP5A1  | 3 | -0.2572704 | 1.51E-09 | 2.75E-05   | 0.375 | 0.596 |
| LTA4H   | 3 | -0.2573225 | 6.83E-09 | 0.00012471 | 0.439 | 0.631 |
| TMEM219 | 3 | -0.2590516 | 6.21E-10 | 1.13E-05   | 0.539 | 0.721 |
| VCAN    | 3 | -0.2592137 | 1.23E-11 | 2.24E-07   | 0.119 | 0.324 |
| METTL7A | 3 | -0.2602525 | 2.33E-12 | 4.25E-08   | 0.043 | 0.209 |
| TRAPPC1 | 3 | -0.260766  | 1.28E-10 | 2.34E-06   | 0.302 | 0.53  |
| ATP5H   | 3 | -0.260861  | 3.46E-09 | 6.31E-05   | 0.556 | 0.732 |
| PABPC4  | 3 | -0.2636701 | 1.19E-08 | 0.00021715 | 0.485 | 0.659 |
| UBA52   | 3 | -0.2638513 | 2.83E-30 | 5.17E-26   | 1     | 1     |
| HMGN3   | 3 | -0.2646571 | 4.24E-13 | 7.73E-09   | 0.192 | 0.443 |
| SPINT2  | 3 | -0.2653676 | 4.39E-11 | 8.02E-07   | 0.261 | 0.488 |
| BBX     | 3 | -0.2658615 | 1.49E-13 | 2.73E-09   | 0.169 | 0.411 |
| PRKCSH  | 3 | -0.2665528 | 2.44E-12 | 4.45E-08   | 0.204 | 0.439 |
| TMEM98  | 3 | -0.2666168 | 3.50E-14 | 6.39E-10   | 0.159 | 0.408 |
| KRT8    | 3 | -0.2689012 | 3.16E-08 | 0.00057584 | 0.266 | 0.446 |
| RPL18A  | 3 | -0.2690207 | 9.10E-34 | 1.66E-29   | 1     | 1     |
| ERP29   | 3 | -0.2693917 | 2.46E-11 | 4.48E-07   | 0.561 | 0.784 |
| RASD1   | 3 | -0.2704567 | 1.62E-17 | 2.96E-13   | 0.045 | 0.265 |
| CHMP3   | 3 | -0.2706012 | 8.55E-10 | 1.56E-05   | 0.425 | 0.617 |
| SRSF5   | 3 | -0.2706137 | 6.32E-12 | 1.15E-07   | 0.546 | 0.763 |
| UGP2    | 3 | -0.2706726 | 1.10E-08 | 0.00020144 | 0.539 | 0.707 |
| ITM2B   | 3 | -0.2710706 | 8.12E-10 | 1.48E-05   | 0.952 | 0.986 |
| MYEOV2  | 3 | -0.2721333 | 4.76E-11 | 8.69E-07   | 0.565 | 0.749 |
| GOLIM4  | 3 | -0.2727182 | 8.96E-07 | 0.01634559 | 0.261 | 0.425 |
| ATP1A1  | 3 | -0.2730198 | 1.40E-13 | 2.56E-09   | 0.228 | 0.484 |
| ST13    | 3 | -0.2731202 | 1.87E-14 | 3.41E-10   | 0.917 | 0.958 |

|             |   |            |          |            |       |       |
|-------------|---|------------|----------|------------|-------|-------|
| CD320       | 3 | -0.2741719 | 1.23E-09 | 2.25E-05   | 0.219 | 0.411 |
| SERTAD4-AS1 | 3 | -0.2754672 | 1.49E-22 | 2.72E-18   | 0.024 | 0.268 |
| UQCRH       | 3 | -0.2765809 | 2.24E-16 | 4.09E-12   | 0.95  | 0.979 |
| GALNT15     | 3 | -0.2765946 | 6.71E-14 | 1.22E-09   | 0.09  | 0.303 |
| SEP1        | 3 | -0.277548  | 2.25E-18 | 4.10E-14   | 0.083 | 0.341 |
| TGFBR2      | 3 | -0.2775629 | 1.23E-12 | 2.25E-08   | 0.128 | 0.348 |
| H2AFJ       | 3 | -0.2780337 | 9.55E-11 | 1.74E-06   | 0.582 | 0.77  |
| HNRNPM      | 3 | -0.278622  | 4.39E-13 | 8.01E-09   | 0.23  | 0.481 |
| GBP2        | 3 | -0.279323  | 9.33E-11 | 1.70E-06   | 0.173 | 0.376 |
| MRPS21      | 3 | -0.2801119 | 4.92E-13 | 8.98E-09   | 0.781 | 0.909 |
| ATRAID      | 3 | -0.2801266 | 2.88E-09 | 5.26E-05   | 0.656 | 0.822 |
| MYLK        | 3 | -0.2808022 | 7.58E-19 | 1.38E-14   | 0.05  | 0.286 |
| H1FX        | 3 | -0.2810665 | 7.15E-14 | 1.31E-09   | 0.107 | 0.328 |
| AC005152.3  | 3 | -0.2811204 | 8.47E-22 | 1.55E-17   | 0.021 | 0.258 |
| GSTA4       | 3 | -0.2815088 | 1.97E-13 | 3.59E-09   | 0.176 | 0.411 |
| SNHG8       | 3 | -0.2815708 | 1.88E-11 | 3.43E-07   | 0.815 | 0.899 |
| TCEAL8      | 3 | -0.2820006 | 4.31E-12 | 7.86E-08   | 0.525 | 0.728 |
| PARK7       | 3 | -0.2821474 | 4.56E-13 | 8.31E-09   | 0.786 | 0.923 |
| PAM         | 3 | -0.2833895 | 1.51E-12 | 2.76E-08   | 0.371 | 0.627 |
| OXA1L       | 3 | -0.2842847 | 1.20E-11 | 2.19E-07   | 0.406 | 0.627 |
| IFI27L2     | 3 | -0.2850427 | 6.69E-12 | 1.22E-07   | 0.705 | 0.868 |
| FTL         | 3 | -0.2853683 | 8.35E-17 | 1.52E-12   | 1     | 1     |
| FKBP10      | 3 | -0.2855121 | 7.42E-15 | 1.35E-10   | 0.183 | 0.446 |
| TSPAN3      | 3 | -0.2865238 | 1.75E-12 | 3.18E-08   | 0.335 | 0.575 |
| C9orf3      | 3 | -0.2869037 | 6.89E-11 | 1.26E-06   | 0.216 | 0.432 |
| PDIA3       | 3 | -0.2871866 | 1.83E-09 | 3.33E-05   | 0.333 | 0.533 |
| EIF2A       | 3 | -0.2874849 | 1.88E-08 | 0.00034381 | 0.556 | 0.7   |
| RPN2        | 3 | -0.2878404 | 3.20E-17 | 5.84E-13   | 0.076 | 0.321 |
| SERPING1    | 3 | -0.2882714 | 7.05E-10 | 1.29E-05   | 0.423 | 0.634 |
| PRKCDBP     | 3 | -0.2890045 | 1.29E-10 | 2.35E-06   | 0.325 | 0.544 |
| SERF2       | 3 | -0.2896674 | 2.97E-18 | 5.41E-14   | 1     | 1     |
| SOD1        | 3 | -0.2907383 | 2.24E-13 | 4.08E-09   | 0.914 | 0.969 |
| BEX2        | 3 | -0.2917164 | 1.01E-11 | 1.84E-07   | 0.185 | 0.404 |
| MYO10       | 3 | -0.2920777 | 4.00E-11 | 7.30E-07   | 0.1   | 0.289 |
| CRIP2       | 3 | -0.292351  | 5.32E-12 | 9.70E-08   | 0.245 | 0.477 |
| RPL12       | 3 | -0.292466  | 1.22E-28 | 2.23E-24   | 1     | 1     |
| WWP2        | 3 | -0.2926203 | 7.11E-09 | 0.00012974 | 0.361 | 0.568 |
| EBPL        | 3 | -0.2942031 | 2.13E-14 | 3.88E-10   | 0.207 | 0.46  |
| COL6A2      | 3 | -0.2949805 | 6.21E-08 | 0.00113324 | 0.359 | 0.523 |

|          |   |            |          |            |       |       |
|----------|---|------------|----------|------------|-------|-------|
| HLA-B    | 3 | -0.2955033 | 1.02E-06 | 0.01858939 | 0.648 | 0.742 |
| SSR2     | 3 | -0.2982135 | 1.41E-13 | 2.57E-09   | 0.715 | 0.882 |
| F13A1    | 3 | -0.2996296 | 2.44E-08 | 0.00044536 | 0.311 | 0.505 |
| ARL6IP5  | 3 | -0.29971   | 4.68E-11 | 8.54E-07   | 0.485 | 0.672 |
| CMPK1    | 3 | -0.2999832 | 4.87E-12 | 8.88E-08   | 0.682 | 0.847 |
| C19orf43 | 3 | -0.3000055 | 3.01E-14 | 5.49E-10   | 0.781 | 0.892 |
| C12orf57 | 3 | -0.3003899 | 1.15E-19 | 2.09E-15   | 0.955 | 0.993 |
| PGAM1    | 3 | -0.3005936 | 4.54E-13 | 8.29E-09   | 0.634 | 0.805 |
| TMED10   | 3 | -0.3019983 | 1.19E-09 | 2.18E-05   | 0.708 | 0.85  |
| RPL14    | 3 | -0.3033113 | 1.79E-33 | 3.27E-29   | 1     | 1     |
| TCEA3    | 3 | -0.303777  | 1.25E-18 | 2.27E-14   | 0.162 | 0.456 |
| TNFRSF1A | 3 | -0.3039012 | 1.58E-13 | 2.89E-09   | 0.216 | 0.456 |
| RPS10    | 3 | -0.3045751 | 2.60E-22 | 4.75E-18   | 0.995 | 0.993 |
| PTMA     | 3 | -0.3054576 | 1.95E-22 | 3.57E-18   | 1     | 1     |
| RPS3     | 3 | -0.305538  | 9.39E-39 | 1.71E-34   | 1     | 1     |
| SCRG1    | 3 | -0.3056347 | 4.15E-07 | 0.00757765 | 0.891 | 0.951 |
| PDE4DIP  | 3 | -0.3064168 | 4.06E-16 | 7.41E-12   | 0.209 | 0.481 |
| SOCS3    | 3 | -0.3065002 | 3.83E-10 | 6.99E-06   | 0.183 | 0.376 |
| NUCB1    | 3 | -0.3065741 | 9.26E-14 | 1.69E-09   | 0.352 | 0.613 |
| FCGRT    | 3 | -0.3067776 | 1.13E-12 | 2.06E-08   | 0.354 | 0.578 |
| SARAF    | 3 | -0.3086806 | 1.58E-12 | 2.88E-08   | 0.589 | 0.787 |
| PRCP     | 3 | -0.3088758 | 9.22E-21 | 1.68E-16   | 0.083 | 0.366 |
| MSRB1    | 3 | -0.3093466 | 5.14E-19 | 9.37E-15   | 0.173 | 0.481 |
| PRDX4    | 3 | -0.309433  | 6.50E-11 | 1.19E-06   | 0.494 | 0.718 |
| BTG2     | 3 | -0.3138679 | 2.35E-12 | 4.28E-08   | 0.145 | 0.359 |
| SCARA3   | 3 | -0.314311  | 4.68E-24 | 8.54E-20   | 0.088 | 0.408 |
| RBMX     | 3 | -0.3144262 | 6.37E-13 | 1.16E-08   | 0.544 | 0.749 |
| COMMD6   | 3 | -0.3148047 | 4.63E-21 | 8.45E-17   | 0.998 | 1     |
| RPL37A   | 3 | -0.3149476 | 2.41E-45 | 4.40E-41   | 1     | 1     |
| ARL6IP4  | 3 | -0.3163388 | 3.87E-15 | 7.05E-11   | 0.786 | 0.93  |
| POLR2L   | 3 | -0.3170715 | 2.78E-10 | 5.07E-06   | 0.72  | 0.878 |
| HMGB1    | 3 | -0.3184221 | 2.88E-14 | 5.26E-10   | 0.72  | 0.871 |
| GAS6     | 3 | -0.3186121 | 2.11E-17 | 3.85E-13   | 0.121 | 0.383 |
| DUT      | 3 | -0.3186121 | 6.18E-13 | 1.13E-08   | 0.473 | 0.679 |
| BSG      | 3 | -0.3188887 | 9.97E-14 | 1.82E-09   | 0.454 | 0.69  |
| UQCRB    | 3 | -0.3195212 | 2.41E-14 | 4.39E-10   | 0.938 | 0.993 |
| TSPAN4   | 3 | -0.3203849 | 2.80E-14 | 5.12E-10   | 0.221 | 0.467 |
| TOMM7    | 3 | -0.3211992 | 4.54E-34 | 8.28E-30   | 1     | 1     |
| IFITM3   | 3 | -0.3213192 | 1.66E-12 | 3.04E-08   | 0.8   | 0.93  |

|               |   |            |          |          |       |       |
|---------------|---|------------|----------|----------|-------|-------|
| RPS18         | 3 | -0.3224453 | 7.39E-43 | 1.35E-38 | 1     | 1     |
| GRN           | 3 | -0.3233037 | 1.20E-17 | 2.18E-13 | 0.119 | 0.383 |
| ATRNL1        | 3 | -0.3239617 | 1.02E-24 | 1.86E-20 | 0.031 | 0.303 |
| ANKH          | 3 | -0.3241273 | 1.87E-11 | 3.41E-07 | 0.39  | 0.61  |
| RPS29         | 3 | -0.3242693 | 1.68E-38 | 3.07E-34 | 1     | 1     |
| PPIA          | 3 | -0.3254997 | 1.05E-15 | 1.91E-11 | 0.895 | 0.962 |
| CUTA          | 3 | -0.3259922 | 3.34E-13 | 6.10E-09 | 0.622 | 0.829 |
| OS9           | 3 | -0.3263171 | 2.19E-16 | 4.00E-12 | 0.242 | 0.526 |
| HADHA         | 3 | -0.3270973 | 3.86E-16 | 7.05E-12 | 0.216 | 0.491 |
| INHBA         | 3 | -0.327136  | 6.57E-15 | 1.20E-10 | 0.135 | 0.383 |
| RPS12         | 3 | -0.3285966 | 3.29E-35 | 6.00E-31 | 1     | 1     |
| RPS7          | 3 | -0.3286922 | 1.61E-32 | 2.93E-28 | 1     | 1     |
| EIF3E         | 3 | -0.3304338 | 2.73E-18 | 4.99E-14 | 0.993 | 0.997 |
| HSP90AB1      | 3 | -0.3306571 | 7.11E-15 | 1.30E-10 | 0.914 | 0.972 |
| DNM3OS        | 3 | -0.3307369 | 3.97E-19 | 7.24E-15 | 0.102 | 0.376 |
| RPS5          | 3 | -0.3309362 | 6.03E-36 | 1.10E-31 | 1     | 1     |
| PFN1          | 3 | -0.3311294 | 3.21E-14 | 5.86E-10 | 0.86  | 0.93  |
| RPL13         | 3 | -0.3316822 | 1.68E-50 | 3.06E-46 | 1     | 1     |
| ZBTB20        | 3 | -0.3320757 | 2.10E-21 | 3.84E-17 | 0.124 | 0.432 |
| ENPP1         | 3 | -0.3353154 | 1.40E-21 | 2.56E-17 | 0.107 | 0.408 |
| RP11-983P16.4 | 3 | -0.3353327 | 9.05E-17 | 1.65E-12 | 0.195 | 0.474 |
| RPS4Y1        | 3 | -0.3354919 | 5.94E-23 | 1.08E-18 | 0.983 | 0.99  |
| CTSK          | 3 | -0.3358977 | 8.73E-21 | 1.59E-16 | 0.074 | 0.345 |
| NACA          | 3 | -0.3368573 | 3.46E-32 | 6.32E-28 | 0.998 | 1     |
| RPL15         | 3 | -0.3389884 | 1.26E-49 | 2.30E-45 | 1     | 1     |
| AC003090.1    | 3 | -0.3404901 | 3.10E-28 | 5.66E-24 | 0.021 | 0.314 |
| PLXDC2        | 3 | -0.3406696 | 1.33E-16 | 2.42E-12 | 0.23  | 0.523 |
| NFIA          | 3 | -0.3407714 | 2.62E-20 | 4.79E-16 | 0.121 | 0.415 |
| LRRC2         | 3 | -0.3411555 | 2.39E-22 | 4.36E-18 | 0.09  | 0.387 |
| RPL6          | 3 | -0.343089  | 2.64E-36 | 4.82E-32 | 1     | 1     |
| SH3BGRL       | 3 | -0.3437895 | 2.33E-18 | 4.25E-14 | 0.268 | 0.578 |
| FIS1          | 3 | -0.3440884 | 1.39E-16 | 2.53E-12 | 0.511 | 0.749 |
| VKORC1        | 3 | -0.3451969 | 1.02E-15 | 1.87E-11 | 0.812 | 0.934 |
| NUPR1         | 3 | -0.3452128 | 2.27E-25 | 4.14E-21 | 0.962 | 0.986 |
| CTSD          | 3 | -0.3454399 | 1.60E-16 | 2.93E-12 | 0.72  | 0.902 |
| LDHB          | 3 | -0.3460885 | 1.52E-15 | 2.77E-11 | 0.622 | 0.822 |
| RPL7A         | 3 | -0.346323  | 1.14E-38 | 2.07E-34 | 1     | 1     |
| PIM3          | 3 | -0.3463366 | 2.93E-11 | 5.35E-07 | 0.394 | 0.613 |
| RPL22         | 3 | -0.3465396 | 1.77E-36 | 3.24E-32 | 1     | 1     |

|              |   |            |          |            |       |       |
|--------------|---|------------|----------|------------|-------|-------|
| MAOB         | 3 | -0.3468459 | 5.88E-14 | 1.07E-09   | 0.285 | 0.547 |
| RPS9         | 3 | -0.3469312 | 4.38E-43 | 7.99E-39   | 1     | 1     |
| HIST1H1C     | 3 | -0.3470219 | 5.75E-09 | 0.00010495 | 0.283 | 0.477 |
| RNF130       | 3 | -0.3478906 | 3.93E-14 | 7.18E-10   | 0.385 | 0.624 |
| RPLP1        | 3 | -0.3486856 | 1.91E-52 | 3.49E-48   | 1     | 1     |
| PRDX5        | 3 | -0.3497849 | 1.42E-17 | 2.59E-13   | 0.805 | 0.944 |
| RPL8         | 3 | -0.3500538 | 9.85E-48 | 1.80E-43   | 1     | 1     |
| CMB9-22P13.1 | 3 | -0.3526398 | 4.68E-16 | 8.53E-12   | 0.333 | 0.606 |
| PTPRD-AS1    | 3 | -0.35365   | 1.87E-18 | 3.41E-14   | 0.197 | 0.488 |
| PDGFRA       | 3 | -0.3539679 | 1.91E-26 | 3.48E-22   | 0.067 | 0.387 |
| AP2M1        | 3 | -0.3541163 | 5.18E-18 | 9.45E-14   | 0.378 | 0.652 |
| C7orf73      | 3 | -0.3567068 | 2.61E-17 | 4.76E-13   | 0.542 | 0.815 |
| SERPINA1     | 3 | -0.3569038 | 6.61E-13 | 1.21E-08   | 0.924 | 0.99  |
| KLF6         | 3 | -0.3572712 | 2.86E-12 | 5.22E-08   | 0.226 | 0.46  |
| ARPC1B       | 3 | -0.3576429 | 5.47E-13 | 9.99E-09   | 0.392 | 0.627 |
| CCDC102B     | 3 | -0.3577744 | 3.87E-25 | 7.06E-21   | 0.036 | 0.317 |
| RPS13        | 3 | -0.3578978 | 2.46E-44 | 4.49E-40   | 1     | 1     |
| ASS1         | 3 | -0.3581309 | 1.36E-15 | 2.48E-11   | 0.425 | 0.676 |
| JUN          | 3 | -0.358269  | 4.01E-10 | 7.31E-06   | 0.202 | 0.394 |
| PNISR        | 3 | -0.3590853 | 6.39E-15 | 1.17E-10   | 0.513 | 0.721 |
| SERPINA5     | 3 | -0.3600646 | 5.86E-20 | 1.07E-15   | 0.128 | 0.418 |
| TPM2         | 3 | -0.3621708 | 7.89E-15 | 1.44E-10   | 0.273 | 0.53  |
| ARPC1A       | 3 | -0.3624657 | 4.77E-18 | 8.71E-14   | 0.375 | 0.672 |
| IFITM1       | 3 | -0.3635421 | 1.07E-11 | 1.95E-07   | 0.278 | 0.505 |
| SSPN         | 3 | -0.365451  | 8.26E-25 | 1.51E-20   | 0.076 | 0.387 |
| SSR4         | 3 | -0.366021  | 1.93E-16 | 3.52E-12   | 0.874 | 0.958 |
| MFGE8        | 3 | -0.3664426 | 1.08E-11 | 1.97E-07   | 0.615 | 0.815 |
| ERGIC3       | 3 | -0.3665232 | 1.32E-16 | 2.40E-12   | 0.613 | 0.836 |
| RPL23        | 3 | -0.3668548 | 1.66E-33 | 3.04E-29   | 1     | 1     |
| CPE          | 3 | -0.3684804 | 4.64E-15 | 8.46E-11   | 0.539 | 0.77  |
| RPL13A       | 3 | -0.3691126 | 8.36E-59 | 1.53E-54   | 1     | 1     |
| FHL1         | 3 | -0.3692477 | 3.45E-17 | 6.29E-13   | 0.178 | 0.456 |
| MAF          | 3 | -0.3694384 | 2.01E-18 | 3.66E-14   | 0.162 | 0.453 |
| MIA          | 3 | -0.369491  | 1.38E-10 | 2.51E-06   | 0.919 | 0.962 |
| PPIC         | 3 | -0.3715226 | 1.22E-16 | 2.22E-12   | 0.2   | 0.467 |
| ILF3-AS1     | 3 | -0.3717653 | 1.77E-17 | 3.23E-13   | 0.214 | 0.498 |
| EIF2S3       | 3 | -0.3721766 | 2.31E-11 | 4.22E-07   | 0.499 | 0.669 |
| HINT1        | 3 | -0.3726218 | 1.65E-29 | 3.02E-25   | 0.971 | 1     |
| LINC01503    | 3 | -0.373337  | 2.92E-15 | 5.33E-11   | 0.169 | 0.425 |



|          |   |            |          |           |       |       |
|----------|---|------------|----------|-----------|-------|-------|
| LITAF    | 3 | -0.3734418 | 2.90E-19 | 5.29E-15  | 0.333 | 0.638 |
| MYL6     | 3 | -0.3747117 | 3.99E-19 | 7.28E-15  | 0.848 | 0.972 |
| TPD52L1  | 3 | -0.3756599 | 1.60E-17 | 2.92E-13  | 0.221 | 0.505 |
| ENAH     | 3 | -0.3767472 | 7.41E-25 | 1.35E-20  | 0.109 | 0.436 |
| CTGF     | 3 | -0.3774281 | 3.48E-08 | 0.0006347 | 0.252 | 0.439 |
| SEPP1    | 3 | -0.3792596 | 8.35E-20 | 1.52E-15  | 0.181 | 0.481 |
| SLC25A3  | 3 | -0.3796282 | 7.01E-23 | 1.28E-18  | 0.846 | 0.976 |
| RPL37    | 3 | -0.3798067 | 8.29E-50 | 1.51E-45  | 1     | 1     |
| RPS27A   | 3 | -0.3817868 | 1.31E-55 | 2.39E-51  | 1     | 1     |
| CDO1     | 3 | -0.3831506 | 3.14E-20 | 5.72E-16  | 0.133 | 0.432 |
| RPS23    | 3 | -0.3838758 | 1.98E-49 | 3.61E-45  | 1     | 1     |
| RPL19    | 3 | -0.3857956 | 1.51E-56 | 2.76E-52  | 1     | 1     |
| RPL10    | 3 | -0.3862707 | 1.81E-52 | 3.29E-48  | 1     | 1     |
| C1orf21  | 3 | -0.3867157 | 3.35E-21 | 6.11E-17  | 0.264 | 0.592 |
| EFNA1    | 3 | -0.3870417 | 1.20E-17 | 2.19E-13  | 0.176 | 0.467 |
| RPS4X    | 3 | -0.3875848 | 1.13E-52 | 2.06E-48  | 1     | 1     |
| ATPIF1   | 3 | -0.3888405 | 2.97E-18 | 5.42E-14  | 0.458 | 0.711 |
| CCDC88A  | 3 | -0.3896092 | 4.13E-23 | 7.53E-19  | 0.09  | 0.394 |
| TTC3     | 3 | -0.3900807 | 5.61E-17 | 1.02E-12  | 0.473 | 0.707 |
| GNAS     | 3 | -0.3906978 | 8.35E-17 | 1.52E-12  | 0.39  | 0.659 |
| NMRK1    | 3 | -0.3908135 | 6.78E-21 | 1.24E-16  | 0.195 | 0.512 |
| RPS2     | 3 | -0.3917227 | 6.74E-48 | 1.23E-43  | 1     | 1     |
| ITGA10   | 3 | -0.393677  | 2.07E-22 | 3.78E-18  | 0.257 | 0.617 |
| EIF3D    | 3 | -0.3955219 | 1.66E-19 | 3.03E-15  | 0.658 | 0.868 |
| MSMP     | 3 | -0.3957492 | 5.34E-09 | 9.75E-05  | 0.197 | 0.401 |
| HIST1H4C | 3 | -0.3963764 | 3.39E-15 | 6.18E-11  | 0.371 | 0.62  |
| CCNG1    | 3 | -0.3971369 | 7.39E-19 | 1.35E-14  | 0.278 | 0.578 |
| RPL30    | 3 | -0.397321  | 2.44E-50 | 4.45E-46  | 1     | 1     |
| THY1     | 3 | -0.3978722 | 1.10E-18 | 2.02E-14  | 0.1   | 0.366 |
| PIK3R1   | 3 | -0.4008502 | 7.55E-24 | 1.38E-19  | 0.045 | 0.324 |
| RPS6     | 3 | -0.4014986 | 1.46E-57 | 2.66E-53  | 1     | 1     |
| SDF4     | 3 | -0.4054091 | 8.66E-20 | 1.58E-15  | 0.368 | 0.655 |
| HLA-A    | 3 | -0.4092618 | 6.52E-15 | 1.19E-10  | 0.781 | 0.909 |
| GLTSCR2  | 3 | -0.409993  | 1.83E-23 | 3.34E-19  | 0.85  | 0.955 |
| C1S      | 3 | -0.4102793 | 6.58E-18 | 1.20E-13  | 0.527 | 0.787 |
| GADD45B  | 3 | -0.4146056 | 2.85E-14 | 5.20E-10  | 0.185 | 0.443 |
| RPSA     | 3 | -0.417342  | 5.94E-36 | 1.08E-31  | 0.99  | 1     |
| CD9      | 3 | -0.4176085 | 1.49E-15 | 2.72E-11  | 0.29  | 0.557 |
| RPL5     | 3 | -0.417686  | 3.67E-41 | 6.70E-37  | 1     | 1     |

|         |   |            |          |          |       |       |
|---------|---|------------|----------|----------|-------|-------|
| SLC14A1 | 3 | -0.4182419 | 1.65E-25 | 3.00E-21 | 0.119 | 0.453 |
| CXXC5   | 3 | -0.4189816 | 5.02E-29 | 9.15E-25 | 0.09  | 0.446 |
| PSAP    | 3 | -0.4192667 | 4.15E-22 | 7.58E-18 | 0.81  | 0.937 |
| MDFI    | 3 | -0.4228909 | 7.24E-25 | 1.32E-20 | 0.159 | 0.516 |
| SSR3    | 3 | -0.4270944 | 1.88E-21 | 3.44E-17 | 0.784 | 0.934 |
| RABAC1  | 3 | -0.4278735 | 7.25E-22 | 1.32E-17 | 0.644 | 0.902 |
| DMKN    | 3 | -0.4316676 | 6.73E-27 | 1.23E-22 | 0.216 | 0.585 |
| SPON2   | 3 | -0.4317253 | 4.96E-30 | 9.05E-26 | 0.045 | 0.376 |
| RPS17   | 3 | -0.437657  | 2.99E-54 | 5.45E-50 | 1     | 1     |
| CITED2  | 3 | -0.4389272 | 3.37E-21 | 6.15E-17 | 0.164 | 0.481 |
| ITM2A   | 3 | -0.4391725 | 1.37E-15 | 2.51E-11 | 0.223 | 0.474 |
| RPLP2   | 3 | -0.4391977 | 1.44E-70 | 2.62E-66 | 1     | 1     |
| CYBRD1  | 3 | -0.4412221 | 1.35E-23 | 2.47E-19 | 0.439 | 0.735 |
| NDUFA11 | 3 | -0.4425206 | 2.77E-24 | 5.05E-20 | 0.767 | 0.927 |
| FAM46A  | 3 | -0.4428699 | 4.85E-13 | 8.85E-09 | 0.366 | 0.575 |
| NAP1L1  | 3 | -0.4468113 | 1.23E-29 | 2.24E-25 | 0.912 | 0.979 |
| GSN     | 3 | -0.4495427 | 1.68E-23 | 3.07E-19 | 0.219 | 0.564 |
| GADD45A | 3 | -0.4524363 | 1.06E-09 | 1.94E-05 | 0.347 | 0.537 |
| RPL18   | 3 | -0.4538579 | 2.91E-58 | 5.32E-54 | 1     | 1     |
| TPM1    | 3 | -0.4599792 | 3.03E-11 | 5.52E-07 | 0.513 | 0.69  |
| RPL9    | 3 | -0.4600602 | 1.44E-61 | 2.62E-57 | 1     | 1     |
| MOXD1   | 3 | -0.4649401 | 2.89E-23 | 5.28E-19 | 0.2   | 0.537 |
| SLC40A1 | 3 | -0.4667157 | 2.42E-36 | 4.42E-32 | 0.033 | 0.404 |
| LUM     | 3 | -0.4712881 | 8.40E-30 | 1.53E-25 | 1     | 1     |
| PEBP1   | 3 | -0.4752402 | 7.65E-25 | 1.40E-20 | 0.658 | 0.875 |
| RPL23A  | 3 | -0.4755063 | 3.77E-71 | 6.88E-67 | 1     | 1     |
| BTF3    | 3 | -0.4775428 | 1.48E-42 | 2.70E-38 | 0.99  | 0.997 |
| AHNAK   | 3 | -0.4779675 | 1.44E-28 | 2.62E-24 | 0.235 | 0.627 |
| IER2    | 3 | -0.4780008 | 1.32E-19 | 2.40E-15 | 0.271 | 0.582 |
| RPS16   | 3 | -0.4792389 | 1.28E-67 | 2.33E-63 | 1     | 1     |
| SEC11A  | 3 | -0.4795278 | 2.27E-34 | 4.14E-30 | 0.765 | 0.948 |
| S100A13 | 3 | -0.4848857 | 8.42E-38 | 1.54E-33 | 0.969 | 1     |
| TSPO    | 3 | -0.4946509 | 5.31E-29 | 9.70E-25 | 0.646 | 0.927 |
| ITM2C   | 3 | -0.4987696 | 1.36E-25 | 2.47E-21 | 0.188 | 0.533 |
| NPC2    | 3 | -0.5009337 | 1.55E-38 | 2.82E-34 | 0.95  | 1     |
| ACTG1   | 3 | -0.5024084 | 9.56E-26 | 1.74E-21 | 0.955 | 0.997 |
| HMGN2   | 3 | -0.5039166 | 1.22E-29 | 2.23E-25 | 0.748 | 0.948 |
| HLA-C   | 3 | -0.5077133 | 5.56E-21 | 1.02E-16 | 0.743 | 0.909 |
| SNAI2   | 3 | -0.5089529 | 3.69E-19 | 6.74E-15 | 0.228 | 0.523 |

|          |   |            |          |          |       |       |
|----------|---|------------|----------|----------|-------|-------|
| RPL34    | 3 | -0.5091944 | 4.08E-70 | 7.44E-66 | 1     | 1     |
| RPS3A    | 3 | -0.5092837 | 8.55E-73 | 1.56E-68 | 1     | 1     |
| PDIA6    | 3 | -0.510454  | 9.26E-26 | 1.69E-21 | 0.337 | 0.686 |
| PCBP2    | 3 | -0.5161649 | 3.45E-32 | 6.29E-28 | 0.805 | 0.962 |
| ID4      | 3 | -0.5217198 | 8.26E-24 | 1.51E-19 | 0.311 | 0.652 |
| RPL3     | 3 | -0.5218932 | 2.99E-71 | 5.46E-67 | 1     | 1     |
| S100A4   | 3 | -0.5289718 | 2.43E-12 | 4.44E-08 | 0.508 | 0.721 |
| CLU      | 3 | -0.529171  | 1.13E-17 | 2.07E-13 | 0.995 | 1     |
| PTRF     | 3 | -0.5316356 | 1.89E-32 | 3.45E-28 | 0.204 | 0.613 |
| EEF1B2   | 3 | -0.5318805 | 1.63E-43 | 2.97E-39 | 0.976 | 0.997 |
| BAMBI    | 3 | -0.5324053 | 1.76E-15 | 3.21E-11 | 0.347 | 0.603 |
| BRK1     | 3 | -0.5326257 | 2.16E-34 | 3.94E-30 | 0.677 | 0.937 |
| DDR2     | 3 | -0.5387147 | 3.60E-37 | 6.56E-33 | 0.166 | 0.606 |
| SPARC    | 3 | -0.5398643 | 2.81E-32 | 5.12E-28 | 0.147 | 0.554 |
| HSPB1    | 3 | -0.5404544 | 1.14E-27 | 2.08E-23 | 0.473 | 0.794 |
| DUSP1    | 3 | -0.5423352 | 4.69E-26 | 8.56E-22 | 0.409 | 0.753 |
| IGFBP7   | 3 | -0.5444838 | 1.20E-16 | 2.19E-12 | 0.641 | 0.85  |
| RGS2     | 3 | -0.5559761 | 1.57E-09 | 2.86E-05 | 0.423 | 0.613 |
| PCOLCE2  | 3 | -0.5564223 | 5.89E-28 | 1.07E-23 | 0.732 | 0.92  |
| YBX1     | 3 | -0.5614818 | 2.62E-47 | 4.77E-43 | 0.964 | 1     |
| ISLR     | 3 | -0.5618024 | 6.84E-37 | 1.25E-32 | 0.078 | 0.481 |
| S100A1   | 3 | -0.5667951 | 1.57E-43 | 2.86E-39 | 0.986 | 1     |
| EIF4B    | 3 | -0.5693529 | 3.86E-33 | 7.05E-29 | 0.639 | 0.913 |
| PRUNE2   | 3 | -0.5746191 | 7.13E-32 | 1.30E-27 | 0.195 | 0.603 |
| VIM      | 3 | -0.5778004 | 1.04E-39 | 1.90E-35 | 0.993 | 1     |
| FBXO2    | 3 | -0.5789907 | 3.70E-32 | 6.74E-28 | 0.435 | 0.805 |
| RPLP0    | 3 | -0.5857685 | 2.73E-72 | 4.97E-68 | 0.998 | 1     |
| PABPC1   | 3 | -0.5858156 | 1.32E-36 | 2.41E-32 | 0.76  | 0.958 |
| RPL7     | 3 | -0.5953333 | 2.01E-66 | 3.66E-62 | 1     | 1     |
| EIF3L    | 3 | -0.599586  | 1.71E-41 | 3.11E-37 | 0.694 | 0.951 |
| H3F3A    | 3 | -0.601454  | 2.37E-50 | 4.32E-46 | 0.895 | 1     |
| TCF4     | 3 | -0.6112532 | 3.50E-42 | 6.39E-38 | 0.185 | 0.666 |
| FOS      | 3 | -0.6195394 | 2.65E-29 | 4.84E-25 | 0.371 | 0.756 |
| FGF7     | 3 | -0.6237202 | 3.33E-28 | 6.08E-24 | 0.152 | 0.544 |
| IFITM2   | 3 | -0.6251204 | 2.47E-35 | 4.51E-31 | 0.743 | 0.965 |
| S100B    | 3 | -0.6303526 | 6.71E-35 | 1.22E-30 | 0.392 | 0.819 |
| ARHGAP29 | 3 | -0.6493685 | 1.24E-39 | 2.27E-35 | 0.195 | 0.645 |
| MT-ND5   | 3 | -0.6498057 | 5.00E-31 | 9.12E-27 | 0.494 | 0.815 |
| NOVA1    | 3 | -0.6582328 | 9.44E-28 | 1.72E-23 | 0.753 | 0.948 |

|         |   |            |          |          |       |       |
|---------|---|------------|----------|----------|-------|-------|
| COL9A3  | 3 | -0.6635334 | 1.46E-27 | 2.66E-23 | 0.185 | 0.554 |
| CYR61   | 3 | -0.665957  | 1.76E-34 | 3.21E-30 | 0.105 | 0.512 |
| COL11A1 | 3 | -0.6660386 | 2.05E-36 | 3.75E-32 | 0.235 | 0.693 |
| P4HB    | 3 | -0.666513  | 2.73E-32 | 4.98E-28 | 0.477 | 0.812 |
| EIF3H   | 3 | -0.6679979 | 1.26E-52 | 2.31E-48 | 0.941 | 0.997 |
| BGN     | 3 | -0.6686116 | 5.45E-38 | 9.95E-34 | 0.893 | 0.993 |
| CTSC    | 3 | -0.6718652 | 3.70E-30 | 6.76E-26 | 0.119 | 0.488 |
| PTMS    | 3 | -0.6722521 | 3.17E-41 | 5.78E-37 | 0.401 | 0.829 |
| NGFRAP1 | 3 | -0.6738731 | 1.33E-44 | 2.44E-40 | 0.513 | 0.934 |
| CCNI    | 3 | -0.6748848 | 4.20E-62 | 7.67E-58 | 0.988 | 0.997 |
| ID2     | 3 | -0.6768243 | 8.90E-25 | 1.62E-20 | 0.489 | 0.78  |
| HTRA1   | 3 | -0.7013831 | 6.73E-46 | 1.23E-41 | 0.466 | 0.906 |
| FTH1    | 3 | -0.7021831 | 1.12E-25 | 2.04E-21 | 1     | 1     |
| MT-ND4  | 3 | -0.7049128 | 3.57E-35 | 6.52E-31 | 0.933 | 0.972 |
| JUNB    | 3 | -0.7123687 | 5.32E-34 | 9.71E-30 | 0.534 | 0.895 |
| RPS8    | 3 | -0.7144676 | 5.30E-94 | 9.68E-90 | 1     | 1     |
| APOD    | 3 | -0.7145078 | 5.82E-28 | 1.06E-23 | 0.185 | 0.551 |
| RPS20   | 3 | -0.7249624 | 2.56E-82 | 4.68E-78 | 1     | 1     |
| FXVD6   | 3 | -0.7257678 | 5.48E-55 | 9.99E-51 | 0.494 | 0.937 |
| CRTAP   | 3 | -0.7275402 | 3.06E-50 | 5.59E-46 | 0.397 | 0.843 |
| EID1    | 3 | -0.7282399 | 2.97E-57 | 5.42E-53 | 0.781 | 0.972 |
| PRELP   | 3 | -0.7318053 | 7.82E-40 | 1.43E-35 | 0.67  | 0.951 |
| CEBPD   | 3 | -0.7376956 | 2.22E-38 | 4.06E-34 | 0.755 | 0.965 |
| TPT1    | 3 | -0.7389289 | 1.76E-88 | 3.21E-84 | 1     | 1     |
| CD99    | 3 | -0.7426678 | 1.24E-53 | 2.26E-49 | 0.732 | 0.969 |
| RPS11   | 3 | -0.7455075 | 6.90E-86 | 1.26E-81 | 0.99  | 1     |
| HNRNPA1 | 3 | -0.752611  | 2.65E-64 | 4.83E-60 | 0.962 | 0.997 |
| MALAT1  | 3 | -0.7538494 | 9.79E-42 | 1.79E-37 | 1     | 1     |
| RBP4    | 3 | -0.7551271 | 8.31E-35 | 1.52E-30 | 0.34  | 0.735 |
| CP      | 3 | -0.7561723 | 1.73E-42 | 3.15E-38 | 0.53  | 0.909 |
| LECT1   | 3 | -0.7600737 | 6.66E-33 | 1.22E-28 | 0.259 | 0.679 |
| RHOBTB3 | 3 | -0.7647645 | 1.05E-41 | 1.92E-37 | 0.292 | 0.728 |
| PAX1    | 3 | -0.7647901 | 4.92E-54 | 8.98E-50 | 0.228 | 0.76  |
| RPL10A  | 3 | -0.7766366 | 2.67E-84 | 4.88E-80 | 1     | 1     |
| RPL4    | 3 | -0.787351  | 1.76E-81 | 3.21E-77 | 0.993 | 1     |
| FMOD    | 3 | -0.8108613 | 5.81E-49 | 1.06E-44 | 0.501 | 0.909 |
| B2M     | 3 | -0.813565  | 2.38E-65 | 4.34E-61 | 0.988 | 1     |
| YBX3    | 3 | -0.8321235 | 6.67E-62 | 1.22E-57 | 0.608 | 0.969 |
| SOD3    | 3 | -0.8446208 | 3.26E-42 | 5.94E-38 | 0.907 | 0.993 |

| EEF2    | 3       | -0.8565789 | 3.12E-61  | 5.70E-57  | 0.964 | 0.997 |
|---------|---------|------------|-----------|-----------|-------|-------|
| MT-CO3  | 3       | -0.9003637 | 6.80E-49  | 1.24E-44  | 0.822 | 0.941 |
| ID1     | 3       | -0.9041066 | 2.16E-34  | 3.94E-30  | 0.371 | 0.77  |
| CCL2    | 3       | -0.9143039 | 6.71E-11  | 1.23E-06  | 0.024 | 0.157 |
| TSC22D1 | 3       | -0.9175177 | 2.93E-37  | 5.35E-33  | 0.477 | 0.833 |
| ZFP36L2 | 3       | -0.9230692 | 5.67E-43  | 1.03E-38  | 0.2   | 0.662 |
| NNMT    | 3       | -0.9283439 | 1.10E-57  | 2.01E-53  | 0.781 | 0.979 |
| MT-CO1  | 3       | -0.9354126 | 1.82E-50  | 3.32E-46  | 0.922 | 0.976 |
| CST3    | 3       | -0.9500077 | 1.51E-67  | 2.76E-63  | 0.931 | 0.997 |
| EEF1A1  | 3       | -0.9521759 | 5.40E-102 | 9.85E-98  | 1     | 1     |
| DCN     | 3       | -0.9533296 | 1.30E-75  | 2.38E-71  | 0.995 | 1     |
| CHI3L1  | 3       | -0.9557609 | 3.72E-42  | 6.79E-38  | 0.857 | 0.983 |
| MT-CO2  | 3       | -0.962029  | 7.02E-50  | 1.28E-45  | 0.903 | 0.969 |
| COL2A1  | 3       | -0.9652335 | 4.61E-54  | 8.41E-50  | 0.2   | 0.756 |
| ACAN    | 3       | -1.0143348 | 1.26E-60  | 2.30E-56  | 0.646 | 0.972 |
| MT-ND3  | 3       | -1.0490966 | 6.13E-59  | 1.12E-54  | 0.485 | 0.889 |
| CCDC80  | 3       | -1.0548503 | 1.80E-51  | 3.29E-47  | 0.618 | 0.958 |
| CAPS    | 3       | -1.0611689 | 4.56E-59  | 8.32E-55  | 0.387 | 0.875 |
| MT-ND1  | 3       | -1.0834577 | 7.55E-58  | 1.38E-53  | 0.466 | 0.909 |
| SPTSSB  | 3       | -1.0973021 | 1.29E-49  | 2.36E-45  | 0.007 | 0.449 |
| C2orf40 | 3       | -1.1127339 | 7.82E-63  | 1.43E-58  | 0.886 | 0.997 |
| MGP     | 3       | -1.1352368 | 1.75E-57  | 3.19E-53  | 0.974 | 1     |
| NEAT1   | 3       | -1.1699854 | 2.81E-76  | 5.12E-72  | 0.969 | 1     |
| MT-ND2  | 3       | -1.1733666 | 1.10E-56  | 2.01E-52  | 0.492 | 0.885 |
| GPX3    | 3       | -1.1779882 | 3.38E-73  | 6.17E-69  | 0.729 | 0.997 |
| MT-ATP6 | 3       | -1.1784809 | 2.21E-60  | 4.04E-56  | 0.675 | 0.941 |
| ID3     | 3       | -1.1888447 | 8.19E-57  | 1.50E-52  | 0.223 | 0.774 |
| ADIRF   | 3       | -1.245136  | 1.14E-74  | 2.08E-70  | 0.216 | 0.854 |
| C2orf82 | 3       | -1.2454916 | 7.13E-62  | 1.30E-57  | 0.85  | 0.979 |
| MT-CYB  | 3       | -1.2477814 | 1.84E-65  | 3.36E-61  | 0.527 | 0.913 |
| CLEC3A  | 3       | -1.2658561 | 7.57E-84  | 1.38E-79  | 0.033 | 0.721 |
| PLAC9   | 3       | -1.2979173 | 4.03E-88  | 7.36E-84  | 0.42  | 0.976 |
| SLPI    | 3       | -1.4647916 | 4.56E-65  | 8.32E-61  | 0.765 | 1     |
| FRZB    | 3       | -1.4971478 | 5.63E-53  | 1.03E-48  | 0.124 | 0.659 |
| OGN     | 3       | -1.5198907 | 1.74E-68  | 3.17E-64  | 0.42  | 0.927 |
| gene    | cluster | avg_logFC  | p_val     | p_val_adj | pct.1 | pct.2 |
| MT2A    | 4       | 2.23586763 | 3.67E-49  | 6.70E-45  | 1     | 0.989 |
| PRG4    | 4       | 1.95137271 | 1.92E-44  | 3.51E-40  | 0.667 | 0.097 |
| TGFBI   | 4       | 1.46522699 | 1.50E-50  | 2.74E-46  | 0.865 | 0.284 |

|             |   |            |          |            |       |       |
|-------------|---|------------|----------|------------|-------|-------|
| SPP1        | 4 | 1.4374114  | 3.21E-68 | 5.86E-64   | 0.769 | 0.046 |
| IGFBP3      | 4 | 1.3016353  | 1.23E-29 | 2.25E-25   | 0.615 | 0.154 |
| CTHRC1      | 4 | 1.16561503 | 3.31E-39 | 6.05E-35   | 0.615 | 0.105 |
| COMP        | 4 | 1.11912911 | 3.93E-27 | 7.17E-23   | 0.936 | 0.684 |
| SOD2        | 4 | 1.09865118 | 5.86E-23 | 1.07E-18   | 0.942 | 0.738 |
| IL11        | 4 | 1.07044141 | 1.93E-23 | 3.52E-19   | 0.25  | 0     |
| LINC00152   | 4 | 1.05858911 | 1.41E-25 | 2.58E-21   | 0.846 | 0.549 |
| MT1E        | 4 | 1.05701839 | 5.84E-24 | 1.07E-19   | 1     | 0.957 |
| MT1G        | 4 | 1.02456717 | 4.53E-14 | 8.26E-10   | 0.955 | 0.835 |
| MT1X        | 4 | 1.01595509 | 4.75E-22 | 8.67E-18   | 1     | 0.986 |
| SERPINE2    | 4 | 1.00245752 | 3.67E-28 | 6.69E-24   | 1     | 0.986 |
| FN1         | 4 | 0.97981597 | 1.99E-40 | 3.64E-36   | 1     | 1     |
| COL1A2      | 4 | 0.8950369  | 5.50E-10 | 1.00E-05   | 0.635 | 0.435 |
| MT1H        | 4 | 0.87978204 | 1.31E-07 | 0.00239581 | 0.679 | 0.476 |
| CYP1B1      | 4 | 0.83358693 | 1.10E-12 | 2.01E-08   | 0.397 | 0.146 |
| PTGS2       | 4 | 0.82432345 | 2.13E-35 | 3.89E-31   | 0.494 | 0.049 |
| SLC25A37    | 4 | 0.79590648 | 1.38E-26 | 2.53E-22   | 0.91  | 0.595 |
| TNFRSF12A   | 4 | 0.75942349 | 4.01E-16 | 7.32E-12   | 0.673 | 0.373 |
| MT1M        | 4 | 0.75873501 | 1.51E-16 | 2.76E-12   | 0.75  | 0.47  |
| SORBS2      | 4 | 0.71654688 | 5.02E-16 | 9.17E-12   | 0.397 | 0.111 |
| VMP1        | 4 | 0.70782826 | 7.46E-22 | 1.36E-17   | 0.821 | 0.511 |
| SAT1        | 4 | 0.69883902 | 3.10E-13 | 5.66E-09   | 0.955 | 0.935 |
| RND3        | 4 | 0.69062783 | 8.27E-16 | 1.51E-11   | 0.436 | 0.141 |
| MIR4435-2HG | 4 | 0.68955005 | 5.83E-17 | 1.06E-12   | 0.673 | 0.373 |
| CXCL8       | 4 | 0.68611396 | 8.21E-16 | 1.50E-11   | 0.212 | 0.014 |
| PHLDA1      | 4 | 0.68132544 | 2.56E-18 | 4.67E-14   | 0.321 | 0.049 |
| S100A2      | 4 | 0.68029927 | 5.58E-10 | 1.02E-05   | 0.609 | 0.362 |
| IER3        | 4 | 0.674405   | 4.11E-12 | 7.50E-08   | 0.449 | 0.181 |
| CTSL        | 4 | 0.66841224 | 4.32E-15 | 7.88E-11   | 0.622 | 0.327 |
| BTG1        | 4 | 0.66689461 | 6.15E-18 | 1.12E-13   | 0.994 | 0.943 |
| UPP1        | 4 | 0.66376031 | 3.19E-23 | 5.82E-19   | 0.513 | 0.127 |
| VEGFA       | 4 | 0.66063085 | 1.51E-19 | 2.76E-15   | 0.795 | 0.432 |
| CTNNB1      | 4 | 0.65656088 | 7.79E-08 | 0.00142175 | 0.635 | 0.441 |
| BMP2        | 4 | 0.64310423 | 5.98E-19 | 1.09E-14   | 0.288 | 0.03  |
| TM4SF1      | 4 | 0.64123098 | 5.04E-13 | 9.20E-09   | 0.763 | 0.486 |
| TMSB4X      | 4 | 0.64093864 | 5.25E-09 | 9.58E-05   | 0.942 | 0.865 |
| STK17A      | 4 | 0.63174427 | 2.32E-18 | 4.24E-14   | 0.474 | 0.149 |
| THBS1       | 4 | 0.61645629 | 1.09E-10 | 1.98E-06   | 0.462 | 0.205 |
| CCDC85B     | 4 | 0.61336191 | 1.52E-14 | 2.77E-10   | 0.897 | 0.738 |

|          |   |            |          |            |       |       |
|----------|---|------------|----------|------------|-------|-------|
| LTBP1    | 4 | 0.6115921  | 3.98E-40 | 7.26E-36   | 0.506 | 0.03  |
| CD44     | 4 | 0.60871179 | 1.08E-23 | 1.96E-19   | 0.885 | 0.505 |
| PMP22    | 4 | 0.59655822 | 8.23E-15 | 1.50E-10   | 0.827 | 0.608 |
| WTAP     | 4 | 0.58921015 | 8.41E-13 | 1.54E-08   | 0.769 | 0.541 |
| CD55     | 4 | 0.5829513  | 3.20E-13 | 5.84E-09   | 0.571 | 0.303 |
| COL3A1   | 4 | 0.57688278 | 1.82E-06 | 0.03328718 | 0.622 | 0.47  |
| HMGA1    | 4 | 0.56535072 | 9.31E-14 | 1.70E-09   | 0.423 | 0.146 |
| SMOX     | 4 | 0.56247801 | 2.00E-07 | 0.00364964 | 0.301 | 0.13  |
| BZW1     | 4 | 0.55804141 | 7.59E-13 | 1.39E-08   | 0.731 | 0.476 |
| AEBP1    | 4 | 0.55711152 | 4.39E-15 | 8.01E-11   | 0.885 | 0.714 |
| PPP3CA   | 4 | 0.55367702 | 2.07E-12 | 3.77E-08   | 0.846 | 0.643 |
| TNC      | 4 | 0.5497167  | 1.30E-34 | 2.37E-30   | 0.455 | 0.03  |
| CHI3L2   | 4 | 0.54929668 | 1.47E-07 | 0.00268757 | 0.577 | 0.389 |
| C11orf96 | 4 | 0.54779405 | 7.97E-19 | 1.45E-14   | 0.288 | 0.03  |
| LOX      | 4 | 0.54673529 | 1.29E-12 | 2.36E-08   | 0.75  | 0.497 |
| CRLF1    | 4 | 0.53949525 | 2.55E-21 | 4.66E-17   | 0.622 | 0.232 |
| GJA1     | 4 | 0.53907704 | 6.94E-17 | 1.27E-12   | 0.519 | 0.197 |
| PLAUR    | 4 | 0.53566939 | 3.39E-22 | 6.18E-18   | 0.494 | 0.119 |
| EVI2A    | 4 | 0.52413986 | 2.69E-27 | 4.90E-23   | 0.455 | 0.065 |
| CCND1    | 4 | 0.52070225 | 4.38E-15 | 7.98E-11   | 0.558 | 0.241 |
| ADAMTS6  | 4 | 0.50554958 | 1.72E-17 | 3.14E-13   | 0.365 | 0.078 |
| SERPINE1 | 4 | 0.5017227  | 1.85E-14 | 3.37E-10   | 0.237 | 0.03  |
| FAP      | 4 | 0.48588449 | 7.84E-22 | 1.43E-17   | 0.558 | 0.173 |
| ERRFI1   | 4 | 0.46649795 | 2.14E-06 | 0.03904397 | 0.391 | 0.224 |
| RCAN1    | 4 | 0.46153198 | 4.67E-11 | 8.51E-07   | 0.372 | 0.132 |
| NRP2     | 4 | 0.46046761 | 2.19E-14 | 4.00E-10   | 0.436 | 0.149 |
| PDE4B    | 4 | 0.4531441  | 2.68E-20 | 4.90E-16   | 0.385 | 0.068 |
| SLC20A1  | 4 | 0.45213958 | 7.84E-14 | 1.43E-09   | 0.359 | 0.097 |
| FOSL1    | 4 | 0.44907317 | 1.39E-19 | 2.54E-15   | 0.321 | 0.041 |
| GSTO1    | 4 | 0.44685674 | 6.99E-08 | 0.00127478 | 0.686 | 0.505 |
| DDIT4L   | 4 | 0.44175442 | 3.19E-08 | 0.00058205 | 0.455 | 0.241 |
| TMSB10   | 4 | 0.43524282 | 5.75E-11 | 1.05E-06   | 1     | 0.997 |
| PPP1CB   | 4 | 0.43232222 | 4.77E-07 | 0.00871143 | 0.833 | 0.746 |
| RABGGTB  | 4 | 0.43160225 | 8.77E-11 | 1.60E-06   | 0.679 | 0.443 |
| NT5E     | 4 | 0.42181425 | 4.19E-10 | 7.65E-06   | 0.679 | 0.451 |
| CYTL1    | 4 | 0.42111076 | 1.05E-08 | 0.00019124 | 0.423 | 0.195 |
| ERO1A    | 4 | 0.41215607 | 2.21E-08 | 0.00040241 | 0.615 | 0.441 |
| PTP4A1   | 4 | 0.41062048 | 1.96E-07 | 0.00356893 | 0.558 | 0.386 |
| ITGB1    | 4 | 0.40913981 | 4.50E-08 | 0.00082134 | 0.737 | 0.641 |

|          |   |            |          |            |       |       |
|----------|---|------------|----------|------------|-------|-------|
| FSTL1    | 4 | 0.40772608 | 7.85E-08 | 0.00143253 | 0.679 | 0.522 |
| WSB1     | 4 | 0.40077577 | 4.81E-09 | 8.78E-05   | 0.853 | 0.719 |
| SMOC1    | 4 | 0.39980988 | 3.62E-13 | 6.60E-09   | 0.538 | 0.254 |
| SLC2A1   | 4 | 0.39784997 | 2.56E-07 | 0.00468015 | 0.327 | 0.151 |
| FHL2     | 4 | 0.39406433 | 1.26E-08 | 0.00022987 | 0.429 | 0.219 |
| TGM2     | 4 | 0.39317706 | 3.26E-09 | 5.95E-05   | 0.353 | 0.149 |
| SGIP1    | 4 | 0.38569631 | 1.77E-25 | 3.23E-21   | 0.346 | 0.024 |
| RNF145   | 4 | 0.37699174 | 6.76E-09 | 0.00012339 | 0.571 | 0.354 |
| MIF      | 4 | 0.36981196 | 1.06E-15 | 1.94E-11   | 1     | 1     |
| CLEC11A  | 4 | 0.36520543 | 2.17E-07 | 0.00395355 | 0.635 | 0.424 |
| COL6A3   | 4 | 0.35389434 | 4.38E-08 | 0.00079914 | 0.622 | 0.419 |
| CNIH1    | 4 | 0.35323129 | 3.44E-08 | 0.00062792 | 0.782 | 0.673 |
| ISG20    | 4 | 0.34987369 | 7.29E-09 | 0.00013297 | 0.404 | 0.189 |
| SPRY2    | 4 | 0.3426172  | 2.02E-10 | 3.68E-06   | 0.256 | 0.065 |
| TFPI     | 4 | 0.33301875 | 5.87E-08 | 0.00107116 | 0.205 | 0.054 |
| VAPA     | 4 | 0.33084247 | 1.96E-07 | 0.00358028 | 0.936 | 0.811 |
| COL1A1   | 4 | 0.32502936 | 8.35E-12 | 1.52E-07   | 0.167 | 0.014 |
| ABL2     | 4 | 0.31360066 | 3.88E-07 | 0.0070821  | 0.359 | 0.176 |
| SMIM3    | 4 | 0.29713247 | 2.31E-14 | 4.21E-10   | 0.34  | 0.081 |
| HLA-DRB1 | 4 | 0.29566296 | 1.42E-07 | 0.00259537 | 0.385 | 0.186 |
| NGF      | 4 | 0.28971737 | 6.81E-14 | 1.24E-09   | 0.263 | 0.043 |
| HIF1A    | 4 | 0.28678022 | 1.52E-06 | 0.02779777 | 0.878 | 0.824 |
| RELB     | 4 | 0.2860127  | 5.79E-14 | 1.06E-09   | 0.282 | 0.051 |
| CLK1     | 4 | 0.28549123 | 7.05E-07 | 0.01286418 | 0.564 | 0.359 |
| BRI3     | 4 | 0.2828664  | 1.43E-08 | 0.00026049 | 0.955 | 0.862 |
| TREM1    | 4 | 0.28172545 | 3.12E-14 | 5.69E-10   | 0.186 | 0.011 |
| CRTAC1   | 4 | 0.27877579 | 7.95E-08 | 0.0014509  | 0.282 | 0.105 |
| CHMP1B   | 4 | 0.27759795 | 2.14E-06 | 0.03913651 | 0.404 | 0.219 |
| MEDAG    | 4 | 0.27533388 | 7.65E-15 | 1.40E-10   | 0.237 | 0.027 |
| PPP1R14C | 4 | 0.27243986 | 4.88E-09 | 8.91E-05   | 0.288 | 0.095 |
| HMGA2    | 4 | 0.27210999 | 2.52E-15 | 4.61E-11   | 0.199 | 0.011 |
| KIFC3    | 4 | 0.26647986 | 5.93E-12 | 1.08E-07   | 0.333 | 0.095 |
| SGK1     | 4 | 0.26452877 | 4.70E-09 | 8.57E-05   | 0.314 | 0.111 |
| FZD8     | 4 | 0.25827543 | 7.03E-09 | 0.0001282  | 0.385 | 0.162 |
| CXCL14   | 4 | 0.25795912 | 1.66E-09 | 3.04E-05   | 0.115 | 0.005 |
| EPS8     | 4 | 0.25751119 | 1.11E-07 | 0.00201676 | 0.333 | 0.141 |
| C11orf31 | 4 | 0.25354922 | 9.03E-07 | 0.01647044 | 0.814 | 0.678 |
| MIR222HG | 4 | 0.25273792 | 1.20E-08 | 0.00021822 | 0.179 | 0.035 |
| USMG5    | 4 | 0.25138221 | 4.55E-08 | 0.00083095 | 0.942 | 0.897 |



|               |   |            |          |            |       |       |
|---------------|---|------------|----------|------------|-------|-------|
| FRMD6         | 4 | 0.25122303 | 3.96E-07 | 0.00723245 | 0.391 | 0.192 |
| DSTN          | 4 | -0.2507648 | 1.87E-09 | 3.42E-05   | 1     | 1     |
| GABARAPL2     | 4 | -0.2519336 | 1.33E-07 | 0.00243462 | 0.795 | 0.916 |
| RPL18A        | 4 | -0.2524865 | 1.62E-17 | 2.96E-13   | 1     | 1     |
| GSTA4         | 4 | -0.2526336 | 5.88E-07 | 0.010737   | 0.192 | 0.403 |
| ENKUR         | 4 | -0.2550867 | 4.21E-09 | 7.68E-05   | 0.051 | 0.278 |
| COPZ2         | 4 | -0.2552265 | 2.03E-06 | 0.03708919 | 0.333 | 0.554 |
| CSTB          | 4 | -0.2557652 | 3.45E-10 | 6.30E-06   | 0.981 | 0.997 |
| PRNP          | 4 | -0.2557827 | 2.33E-07 | 0.004259   | 0.25  | 0.486 |
| RPS4X         | 4 | -0.2558975 | 6.41E-17 | 1.17E-12   | 1     | 1     |
| POLD2         | 4 | -0.2564715 | 1.44E-07 | 0.00263354 | 0.167 | 0.392 |
| RPS18         | 4 | -0.2568828 | 1.01E-19 | 1.85E-15   | 1     | 1     |
| BTF3          | 4 | -0.2569023 | 8.05E-12 | 1.47E-07   | 1     | 0.997 |
| ZFHX4         | 4 | -0.2569442 | 7.01E-08 | 0.00127956 | 0.128 | 0.362 |
| BHLHE41       | 4 | -0.2573126 | 7.17E-07 | 0.01307999 | 0.321 | 0.562 |
| NCOR1         | 4 | -0.258243  | 3.54E-08 | 0.00064592 | 0.167 | 0.411 |
| SOX9          | 4 | -0.2587194 | 4.09E-07 | 0.00746347 | 0.654 | 0.859 |
| PTMS          | 4 | -0.2595741 | 2.71E-07 | 0.00495095 | 0.635 | 0.851 |
| GLO1          | 4 | -0.2597805 | 8.40E-08 | 0.00153246 | 0.237 | 0.476 |
| SSPN          | 4 | -0.2613374 | 2.17E-06 | 0.03961122 | 0.321 | 0.538 |
| PRUNE2        | 4 | -0.2614672 | 1.89E-06 | 0.03455273 | 0.256 | 0.476 |
| JTB           | 4 | -0.2617951 | 2.98E-08 | 0.00054319 | 0.673 | 0.868 |
| RP11-983P16.4 | 4 | -0.2620856 | 2.70E-07 | 0.004927   | 0.212 | 0.438 |
| CPE           | 4 | -0.2625456 | 2.66E-06 | 0.04859559 | 0.494 | 0.67  |
| CMB9-22P13.1  | 4 | -0.2628001 | 7.26E-07 | 0.0132505  | 0.404 | 0.611 |
| RPL11         | 4 | -0.2630394 | 1.97E-19 | 3.60E-15   | 1     | 1     |
| RPL31         | 4 | -0.2631179 | 2.73E-16 | 4.98E-12   | 1     | 1     |
| CKAP4         | 4 | -0.2634167 | 7.26E-08 | 0.00132516 | 0.288 | 0.551 |
| COX7C         | 4 | -0.2635902 | 1.63E-14 | 2.97E-10   | 1     | 1     |
| CYBRD1        | 4 | -0.2637673 | 3.04E-07 | 0.00555236 | 0.577 | 0.757 |
| SNX3          | 4 | -0.2638702 | 9.65E-10 | 1.76E-05   | 0.974 | 0.997 |
| TOMM7         | 4 | -0.2653911 | 9.03E-16 | 1.65E-11   | 1     | 1     |
| RPS3          | 4 | -0.2665447 | 2.07E-20 | 3.77E-16   | 1     | 1     |
| GTF2A2        | 4 | -0.2683523 | 4.55E-08 | 0.00083032 | 0.282 | 0.541 |
| BBX           | 4 | -0.2687034 | 5.46E-08 | 0.00099703 | 0.244 | 0.495 |
| RPL22         | 4 | -0.268832  | 3.44E-14 | 6.28E-10   | 1     | 1     |
| RPL15         | 4 | -0.2691895 | 1.20E-23 | 2.19E-19   | 1     | 1     |
| PRDX5         | 4 | -0.2695948 | 9.78E-08 | 0.00178501 | 0.788 | 0.941 |
| VIM           | 4 | -0.2698336 | 2.30E-09 | 4.20E-05   | 1     | 1     |

|          |   |            |          |            |       |       |
|----------|---|------------|----------|------------|-------|-------|
| RNF130   | 4 | -0.2727605 | 3.28E-07 | 0.0059783  | 0.321 | 0.546 |
| SMIM5    | 4 | -0.274407  | 1.75E-10 | 3.20E-06   | 0.077 | 0.354 |
| TCEAL2   | 4 | -0.2745744 | 8.86E-08 | 0.00161696 | 0.218 | 0.457 |
| PLA2G16  | 4 | -0.2751454 | 1.54E-07 | 0.0028086  | 0.173 | 0.4   |
| RPL5     | 4 | -0.2760318 | 1.17E-14 | 2.13E-10   | 1     | 1     |
| CCNG1    | 4 | -0.2761234 | 1.04E-07 | 0.00190105 | 0.378 | 0.619 |
| RPS4Y1   | 4 | -0.2762799 | 2.21E-10 | 4.03E-06   | 0.962 | 0.995 |
| RPL10    | 4 | -0.2764432 | 1.06E-21 | 1.93E-17   | 1     | 1     |
| H3F3A    | 4 | -0.2765811 | 1.66E-12 | 3.02E-08   | 0.981 | 0.997 |
| ILF3-AS1 | 4 | -0.2778054 | 2.68E-08 | 0.00048882 | 0.218 | 0.473 |
| ID11     | 4 | -0.2778509 | 1.88E-06 | 0.03435889 | 0.263 | 0.465 |
| PCBP2    | 4 | -0.2782005 | 7.96E-09 | 0.00014532 | 0.929 | 0.97  |
| MLEC     | 4 | -0.2787459 | 1.56E-07 | 0.00283823 | 0.288 | 0.53  |
| TCEAL8   | 4 | -0.2791714 | 1.31E-07 | 0.0023864  | 0.647 | 0.846 |
| RPL35A   | 4 | -0.279186  | 8.21E-21 | 1.50E-16   | 1     | 1     |
| PIM3     | 4 | -0.2794877 | 2.70E-07 | 0.00492355 | 0.212 | 0.454 |
| KAZALD1  | 4 | -0.2796655 | 2.86E-08 | 0.00052138 | 0.103 | 0.332 |
| UGP2     | 4 | -0.2796821 | 1.60E-07 | 0.00291247 | 0.59  | 0.77  |
| MPC2     | 4 | -0.2797793 | 1.72E-07 | 0.00313577 | 0.385 | 0.614 |
| DPYSL3   | 4 | -0.2804277 | 1.76E-10 | 3.21E-06   | 0.096 | 0.37  |
| RPS7     | 4 | -0.2804742 | 2.91E-16 | 5.30E-12   | 1     | 1     |
| EEF1D    | 4 | -0.2815436 | 1.02E-14 | 1.85E-10   | 1     | 1     |
| CALM2    | 4 | -0.2834442 | 9.60E-10 | 1.75E-05   | 0.936 | 0.992 |
| RPA3     | 4 | -0.2839547 | 1.03E-06 | 0.01871955 | 0.404 | 0.603 |
| HMG2     | 4 | -0.2850233 | 2.20E-11 | 4.02E-07   | 0.795 | 0.951 |
| CCDC14   | 4 | -0.2866004 | 4.95E-08 | 0.00090306 | 0.199 | 0.449 |
| RPL23    | 4 | -0.2871438 | 1.79E-16 | 3.27E-12   | 1     | 1     |
| ERGIC3   | 4 | -0.2872882 | 8.89E-10 | 1.62E-05   | 0.795 | 0.951 |
| TTC3     | 4 | -0.2902119 | 1.23E-09 | 2.24E-05   | 0.731 | 0.916 |
| SMIM19   | 4 | -0.2902445 | 4.43E-08 | 0.0008075  | 0.308 | 0.549 |
| SH3BGR1  | 4 | -0.2914775 | 3.97E-08 | 0.0007236  | 0.442 | 0.662 |
| TPD52L1  | 4 | -0.2926084 | 5.67E-08 | 0.00103416 | 0.173 | 0.408 |
| ACTG1    | 4 | -0.2946267 | 3.28E-08 | 0.0005986  | 0.923 | 0.984 |
| NDUFA4L2 | 4 | -0.2954795 | 6.32E-15 | 1.15E-10   | 1     | 1     |
| CLTB     | 4 | -0.2978055 | 1.76E-08 | 0.00032115 | 0.314 | 0.568 |
| LTA4H    | 4 | -0.2980493 | 8.49E-07 | 0.01549515 | 0.295 | 0.505 |
| DDR2     | 4 | -0.2999701 | 1.37E-08 | 0.00024939 | 0.417 | 0.692 |
| FIS1     | 4 | -0.3003931 | 1.16E-08 | 0.00021137 | 0.519 | 0.732 |
| RPL3     | 4 | -0.3006306 | 1.76E-20 | 3.21E-16   | 1     | 1     |

|           |   |            |          |            |       |       |
|-----------|---|------------|----------|------------|-------|-------|
| INHBA     | 4 | -0.301444  | 3.70E-08 | 0.00067487 | 0.494 | 0.754 |
| HNRNPA1   | 4 | -0.3016134 | 2.56E-08 | 0.00046669 | 0.962 | 0.997 |
| RPL21     | 4 | -0.303391  | 2.31E-26 | 4.21E-22   | 1     | 1     |
| KDELR2    | 4 | -0.3034025 | 2.01E-09 | 3.66E-05   | 0.827 | 0.965 |
| NUCB2     | 4 | -0.304523  | 1.16E-06 | 0.02108249 | 0.353 | 0.557 |
| ITM2B     | 4 | -0.3048862 | 1.08E-06 | 0.01970784 | 0.904 | 0.976 |
| ISM1      | 4 | -0.3051395 | 1.74E-09 | 3.17E-05   | 0.147 | 0.419 |
| PRDX2     | 4 | -0.3055829 | 9.84E-08 | 0.00179498 | 0.571 | 0.765 |
| SSR3      | 4 | -0.3057697 | 2.29E-09 | 4.18E-05   | 0.833 | 0.951 |
| TMEM59    | 4 | -0.3057913 | 3.45E-07 | 0.00629111 | 0.878 | 0.959 |
| SDF4      | 4 | -0.3064243 | 2.43E-07 | 0.004436   | 0.513 | 0.7   |
| KDELR3    | 4 | -0.306759  | 5.40E-09 | 9.86E-05   | 0.237 | 0.503 |
| PPIC      | 4 | -0.308371  | 1.40E-08 | 0.00025586 | 0.571 | 0.811 |
| TMEM106C  | 4 | -0.3088186 | 6.46E-10 | 1.18E-05   | 0.192 | 0.459 |
| PRDX1     | 4 | -0.3089071 | 4.32E-09 | 7.88E-05   | 0.744 | 0.884 |
| HOXB6     | 4 | -0.3093239 | 3.87E-07 | 0.00706173 | 0.186 | 0.397 |
| TMEM98    | 4 | -0.3097665 | 2.34E-09 | 4.28E-05   | 0.269 | 0.535 |
| ATRAID    | 4 | -0.3105603 | 4.46E-08 | 0.00081404 | 0.731 | 0.868 |
| MDFI      | 4 | -0.3118906 | 1.40E-07 | 0.002559   | 0.558 | 0.776 |
| MAP1B     | 4 | -0.3120612 | 3.04E-09 | 5.55E-05   | 0.115 | 0.373 |
| TUBB4B    | 4 | -0.3125004 | 7.02E-09 | 0.00012815 | 0.25  | 0.527 |
| MKX       | 4 | -0.31337   | 1.31E-10 | 2.39E-06   | 0.167 | 0.459 |
| HLA-B     | 4 | -0.3170848 | 5.05E-07 | 0.00920984 | 0.635 | 0.789 |
| DBP       | 4 | -0.3172034 | 4.52E-09 | 8.25E-05   | 0.109 | 0.354 |
| ARL6IP5   | 4 | -0.3173842 | 9.58E-09 | 0.00017478 | 0.571 | 0.751 |
| RPLP1     | 4 | -0.3175613 | 2.55E-31 | 4.66E-27   | 1     | 1     |
| EEF1B2    | 4 | -0.318253  | 6.37E-12 | 1.16E-07   | 0.962 | 0.997 |
| MALAT1    | 4 | -0.3189017 | 5.98E-08 | 0.00109042 | 1     | 1     |
| EDF1      | 4 | -0.324175  | 3.36E-15 | 6.14E-11   | 0.949 | 0.973 |
| MPP6      | 4 | -0.3242634 | 5.88E-10 | 1.07E-05   | 0.147 | 0.419 |
| PSAP      | 4 | -0.3253585 | 1.34E-10 | 2.45E-06   | 0.788 | 0.941 |
| CRIP2     | 4 | -0.3257672 | 9.89E-08 | 0.00180448 | 0.417 | 0.632 |
| RPL13     | 4 | -0.3279908 | 9.26E-32 | 1.69E-27   | 1     | 1     |
| RPS27     | 4 | -0.3280009 | 1.61E-26 | 2.93E-22   | 1     | 1     |
| HIF1A-AS2 | 4 | -0.3281591 | 9.82E-07 | 0.01791764 | 0.263 | 0.478 |
| LITAF     | 4 | -0.3284232 | 1.01E-08 | 0.0001835  | 0.474 | 0.689 |
| RPL19     | 4 | -0.3286366 | 5.67E-30 | 1.03E-25   | 1     | 1     |
| YBX3      | 4 | -0.3287528 | 1.01E-09 | 1.84E-05   | 0.756 | 0.932 |
| RPL37     | 4 | -0.3288432 | 4.31E-26 | 7.87E-22   | 1     | 1     |

|              |   |            |          |            |       |       |
|--------------|---|------------|----------|------------|-------|-------|
| MT-ND5       | 4 | -0.3290846 | 4.10E-07 | 0.00748836 | 0.603 | 0.765 |
| RPS25        | 4 | -0.3291555 | 3.17E-26 | 5.78E-22   | 1     | 1     |
| RPS12        | 4 | -0.330229  | 6.41E-24 | 1.17E-19   | 1     | 1     |
| BEX4         | 4 | -0.3302755 | 1.91E-09 | 3.48E-05   | 0.436 | 0.695 |
| NENF         | 4 | -0.3311598 | 2.21E-12 | 4.03E-08   | 0.891 | 0.97  |
| RPS5         | 4 | -0.3327327 | 5.65E-24 | 1.03E-19   | 1     | 1     |
| ZBTB20       | 4 | -0.333053  | 6.87E-09 | 0.00012531 | 0.269 | 0.522 |
| MT-ND4       | 4 | -0.3335781 | 1.80E-09 | 3.28E-05   | 0.987 | 0.989 |
| RPSA         | 4 | -0.3350003 | 1.26E-16 | 2.31E-12   | 0.994 | 1     |
| SOD1         | 4 | -0.3354904 | 1.01E-10 | 1.85E-06   | 0.846 | 0.965 |
| RPS19        | 4 | -0.3357362 | 7.12E-26 | 1.30E-21   | 1     | 1     |
| CCNI         | 4 | -0.3367759 | 2.64E-15 | 4.82E-11   | 1     | 1     |
| RPS9         | 4 | -0.3369287 | 9.72E-28 | 1.77E-23   | 1     | 1     |
| RPS23        | 4 | -0.3374707 | 1.33E-29 | 2.43E-25   | 1     | 1     |
| GOLIM4       | 4 | -0.3377362 | 5.96E-07 | 0.01087091 | 0.397 | 0.649 |
| MT-CO2       | 4 | -0.3398565 | 1.75E-10 | 3.20E-06   | 0.962 | 0.995 |
| COMMD6       | 4 | -0.3407194 | 2.28E-20 | 4.16E-16   | 0.987 | 1     |
| RPS13        | 4 | -0.3421818 | 1.20E-23 | 2.19E-19   | 1     | 1     |
| ARL2BP       | 4 | -0.342896  | 9.91E-10 | 1.81E-05   | 0.429 | 0.703 |
| JUN          | 4 | -0.3430395 | 1.51E-07 | 0.00276007 | 0.135 | 0.357 |
| ATP5O        | 4 | -0.3450906 | 8.05E-12 | 1.47E-07   | 0.673 | 0.846 |
| NDUFA11      | 4 | -0.3464689 | 1.88E-13 | 3.42E-09   | 0.897 | 0.976 |
| RBP4         | 4 | -0.3493756 | 9.89E-09 | 0.00018047 | 0.654 | 0.892 |
| TSPO         | 4 | -0.3493756 | 2.97E-11 | 5.42E-07   | 0.763 | 0.943 |
| RPS6         | 4 | -0.3504651 | 3.70E-30 | 6.74E-26   | 1     | 1     |
| RPLP2        | 4 | -0.3511433 | 2.53E-31 | 4.62E-27   | 1     | 1     |
| TSPAN3       | 4 | -0.3517646 | 2.87E-10 | 5.24E-06   | 0.327 | 0.608 |
| LDHB         | 4 | -0.3536093 | 6.17E-10 | 1.13E-05   | 0.654 | 0.835 |
| TCEA1        | 4 | -0.3538265 | 1.88E-07 | 0.0034235  | 0.583 | 0.746 |
| HINT1        | 4 | -0.3538646 | 5.52E-18 | 1.01E-13   | 0.981 | 0.997 |
| PABPC1       | 4 | -0.3546733 | 2.35E-12 | 4.29E-08   | 0.782 | 0.962 |
| C14orf1      | 4 | -0.3553637 | 5.51E-11 | 1.01E-06   | 0.231 | 0.522 |
| RP11-71N10.1 | 4 | -0.3554547 | 1.85E-12 | 3.38E-08   | 0.038 | 0.33  |
| RPL8         | 4 | -0.3564232 | 6.38E-32 | 1.16E-27   | 1     | 1     |
| RARRES3      | 4 | -0.3597561 | 5.86E-16 | 1.07E-11   | 0.013 | 0.349 |
| PDIA6        | 4 | -0.3612072 | 5.71E-10 | 1.04E-05   | 0.577 | 0.786 |
| NAP1L1       | 4 | -0.3618017 | 6.27E-13 | 1.14E-08   | 0.904 | 0.97  |
| HLA-C        | 4 | -0.3650184 | 3.98E-09 | 7.26E-05   | 0.744 | 0.914 |
| SRP14        | 4 | -0.3669076 | 1.02E-16 | 1.87E-12   | 0.949 | 0.997 |

|            |   |            |          |            |       |       |
|------------|---|------------|----------|------------|-------|-------|
| NEAT1      | 4 | -0.3672583 | 2.38E-08 | 0.00043445 | 1     | 1     |
| CALM3      | 4 | -0.3673264 | 6.17E-11 | 1.13E-06   | 0.494 | 0.762 |
| TBL1XR1    | 4 | -0.3680921 | 5.17E-07 | 0.00942888 | 0.519 | 0.716 |
| SPINT2     | 4 | -0.3692863 | 4.69E-10 | 8.57E-06   | 0.237 | 0.524 |
| RPS29      | 4 | -0.371438  | 9.17E-32 | 1.67E-27   | 1     | 1     |
| LRRC2      | 4 | -0.3733123 | 3.10E-15 | 5.66E-11   | 0.045 | 0.386 |
| ITM2C      | 4 | -0.3744503 | 3.93E-09 | 7.17E-05   | 0.513 | 0.751 |
| AP2M1      | 4 | -0.3747272 | 1.39E-10 | 2.54E-06   | 0.372 | 0.643 |
| SLC14A1    | 4 | -0.3755472 | 1.88E-08 | 0.00034261 | 0.282 | 0.516 |
| MORF4L2    | 4 | -0.3756326 | 1.65E-11 | 3.02E-07   | 0.596 | 0.808 |
| EID1       | 4 | -0.3786197 | 1.12E-15 | 2.04E-11   | 0.878 | 0.986 |
| RPL23A     | 4 | -0.3795857 | 5.51E-32 | 1.00E-27   | 1     | 1     |
| ENAH       | 4 | -0.3821693 | 2.74E-12 | 4.99E-08   | 0.333 | 0.643 |
| AC003090.1 | 4 | -0.3827262 | 8.26E-18 | 1.51E-13   | 0.006 | 0.37  |
| ZFAS1      | 4 | -0.3829075 | 3.80E-11 | 6.94E-07   | 0.955 | 0.997 |
| NKX3-2     | 4 | -0.3833189 | 2.23E-11 | 4.06E-07   | 0.083 | 0.37  |
| PKM        | 4 | -0.3839718 | 1.13E-12 | 2.06E-08   | 0.776 | 0.951 |
| MYL6       | 4 | -0.384635  | 2.14E-14 | 3.91E-10   | 0.917 | 0.984 |
| HSP90AB1   | 4 | -0.3846417 | 9.42E-13 | 1.72E-08   | 0.859 | 0.962 |
| RPS17      | 4 | -0.3864615 | 4.85E-31 | 8.85E-27   | 1     | 1     |
| CALM1      | 4 | -0.389685  | 1.04E-10 | 1.90E-06   | 0.378 | 0.67  |
| MT-CO3     | 4 | -0.3921544 | 1.10E-11 | 2.00E-07   | 0.949 | 0.989 |
| EIF4B      | 4 | -0.3934837 | 3.05E-13 | 5.57E-09   | 0.686 | 0.881 |
| ID3        | 4 | -0.3951093 | 1.41E-12 | 2.58E-08   | 0.641 | 0.935 |
| PPP1R3C    | 4 | -0.3954579 | 5.65E-11 | 1.03E-06   | 0.365 | 0.649 |
| BEX2       | 4 | -0.3956626 | 6.05E-13 | 1.10E-08   | 0.09  | 0.408 |
| DMKN       | 4 | -0.3962658 | 1.87E-12 | 3.41E-08   | 0.321 | 0.616 |
| MFGE8      | 4 | -0.397529  | 2.46E-09 | 4.49E-05   | 0.641 | 0.835 |
| SOD3       | 4 | -0.397859  | 1.08E-07 | 0.00196723 | 0.872 | 0.946 |
| HSPA8      | 4 | -0.4005036 | 5.18E-10 | 9.45E-06   | 0.333 | 0.605 |
| RDX        | 4 | -0.400812  | 3.81E-10 | 6.95E-06   | 0.449 | 0.692 |
| RPL10A     | 4 | -0.4016746 | 2.74E-29 | 5.00E-25   | 1     | 1     |
| OSBPL9     | 4 | -0.4019039 | 1.93E-11 | 3.53E-07   | 0.333 | 0.622 |
| NINJ1      | 4 | -0.4022086 | 1.49E-13 | 2.72E-09   | 0.365 | 0.73  |
| SLC38A1    | 4 | -0.4035614 | 2.80E-13 | 5.10E-09   | 0.288 | 0.635 |
| ST13       | 4 | -0.4045549 | 1.14E-14 | 2.08E-10   | 0.853 | 0.959 |
| MSMO1      | 4 | -0.4053525 | 1.25E-10 | 2.28E-06   | 0.173 | 0.476 |
| FXYP6      | 4 | -0.4058658 | 9.57E-16 | 1.75E-11   | 0.782 | 0.943 |
| CREG1      | 4 | -0.4062221 | 3.12E-13 | 5.69E-09   | 0.244 | 0.584 |

|               |   |            |          |            |       |       |
|---------------|---|------------|----------|------------|-------|-------|
| RPL13A        | 4 | -0.407605  | 1.21E-38 | 2.21E-34   | 1     | 1     |
| COL2A1        | 4 | -0.4078539 | 1.57E-11 | 2.87E-07   | 0.647 | 0.957 |
| MOXD1         | 4 | -0.4121408 | 4.72E-14 | 8.61E-10   | 0.16  | 0.503 |
| INSIG1        | 4 | -0.4134867 | 2.00E-06 | 0.03651886 | 0.314 | 0.519 |
| RP5-1097P24.1 | 4 | -0.4166828 | 1.12E-11 | 2.05E-07   | 0.173 | 0.465 |
| RPL18         | 4 | -0.4170197 | 1.23E-30 | 2.25E-26   | 1     | 1     |
| VCAN          | 4 | -0.4205709 | 8.62E-07 | 0.01572028 | 0.513 | 0.681 |
| TPT1          | 4 | -0.4278187 | 1.68E-32 | 3.06E-28   | 1     | 1     |
| MT-CO1        | 4 | -0.4293079 | 4.20E-14 | 7.66E-10   | 0.974 | 0.986 |
| RPL9          | 4 | -0.4314338 | 6.59E-38 | 1.20E-33   | 1     | 1     |
| SEC11A        | 4 | -0.4335986 | 5.50E-17 | 1.00E-12   | 0.731 | 0.927 |
| RPL34         | 4 | -0.4339851 | 2.66E-35 | 4.85E-31   | 1     | 1     |
| RPS27A        | 4 | -0.4365514 | 3.16E-34 | 5.76E-30   | 1     | 1     |
| RPL30         | 4 | -0.4406738 | 2.76E-34 | 5.03E-30   | 1     | 1     |
| GSTP1         | 4 | -0.4410561 | 4.92E-14 | 8.97E-10   | 0.865 | 0.954 |
| RPS16         | 4 | -0.4429952 | 1.68E-39 | 3.06E-35   | 1     | 1     |
| C2orf40       | 4 | -0.4449537 | 9.52E-12 | 1.74E-07   | 0.974 | 0.997 |
| HLA-A         | 4 | -0.4469355 | 8.01E-13 | 1.46E-08   | 0.75  | 0.911 |
| PEBP1         | 4 | -0.4508285 | 2.32E-15 | 4.23E-11   | 0.679 | 0.905 |
| RPS3A         | 4 | -0.452627  | 3.48E-38 | 6.35E-34   | 1     | 1     |
| GADD45B       | 4 | -0.4545939 | 1.43E-07 | 0.00261302 | 0.224 | 0.446 |
| NFIA          | 4 | -0.4547851 | 9.26E-16 | 1.69E-11   | 0.276 | 0.657 |
| DNM3OS        | 4 | -0.4548853 | 6.77E-12 | 1.23E-07   | 0.462 | 0.732 |
| AHNAK2        | 4 | -0.4570931 | 2.28E-11 | 4.15E-07   | 0.205 | 0.503 |
| AFF3          | 4 | -0.461571  | 1.36E-18 | 2.48E-14   | 0.096 | 0.505 |
| OAF           | 4 | -0.4634422 | 3.39E-15 | 6.18E-11   | 0.167 | 0.527 |
| DYNLL1        | 4 | -0.4658773 | 5.86E-14 | 1.07E-09   | 0.788 | 0.938 |
| S100B         | 4 | -0.4663289 | 4.72E-12 | 8.62E-08   | 0.635 | 0.859 |
| PFN2          | 4 | -0.4665388 | 8.22E-16 | 1.50E-11   | 0.41  | 0.749 |
| MT-ND1        | 4 | -0.466789  | 4.02E-11 | 7.33E-07   | 0.705 | 0.908 |
| COL9A3        | 4 | -0.467151  | 2.80E-13 | 5.12E-09   | 0.5   | 0.811 |
| TCF4          | 4 | -0.4672699 | 4.57E-13 | 8.33E-09   | 0.494 | 0.776 |
| SPON2         | 4 | -0.4673682 | 1.10E-13 | 2.01E-09   | 0.071 | 0.395 |
| RPL4          | 4 | -0.4687207 | 2.76E-29 | 5.03E-25   | 1     | 1     |
| ITM2A         | 4 | -0.4783745 | 1.45E-13 | 2.65E-09   | 0.365 | 0.692 |
| PDE4DIP       | 4 | -0.4812621 | 1.29E-15 | 2.36E-11   | 0.34  | 0.668 |
| NPC2          | 4 | -0.4934003 | 2.22E-27 | 4.05E-23   | 0.955 | 0.995 |
| RHOBTB3       | 4 | -0.4968632 | 1.03E-15 | 1.88E-11   | 0.494 | 0.762 |
| UMAD1         | 4 | -0.5014751 | 3.32E-17 | 6.07E-13   | 0.135 | 0.519 |

|           |   |            |          |            |       |       |
|-----------|---|------------|----------|------------|-------|-------|
| TUBB      | 4 | -0.5038675 | 7.54E-16 | 1.38E-11   | 0.731 | 0.922 |
| EIF3L     | 4 | -0.5042438 | 3.70E-22 | 6.76E-18   | 0.712 | 0.957 |
| ATRNL1    | 4 | -0.5103437 | 3.63E-18 | 6.62E-14   | 0.154 | 0.554 |
| RPLP0     | 4 | -0.5105699 | 2.95E-40 | 5.39E-36   | 1     | 1     |
| TMED10    | 4 | -0.5107566 | 2.71E-20 | 4.94E-16   | 0.763 | 0.943 |
| GREM1     | 4 | -0.5120492 | 2.43E-09 | 4.43E-05   | 0.026 | 0.249 |
| CCDC102B  | 4 | -0.5141847 | 6.33E-19 | 1.16E-14   | 0.122 | 0.535 |
| CST3      | 4 | -0.5178613 | 2.97E-21 | 5.43E-17   | 0.994 | 1     |
| SNAI2     | 4 | -0.5181731 | 7.52E-11 | 1.37E-06   | 0.564 | 0.768 |
| FGFBP2    | 4 | -0.5197019 | 7.15E-09 | 0.00013044 | 0.814 | 0.943 |
| FOS       | 4 | -0.5217071 | 1.09E-14 | 1.99E-10   | 0.372 | 0.697 |
| RPS8      | 4 | -0.5330237 | 1.57E-46 | 2.87E-42   | 1     | 1     |
| MYLK      | 4 | -0.5393465 | 7.36E-18 | 1.34E-13   | 0.167 | 0.57  |
| PTRF      | 4 | -0.5464921 | 1.54E-21 | 2.81E-17   | 0.468 | 0.808 |
| NUPR1     | 4 | -0.5497565 | 6.85E-15 | 1.25E-10   | 0.923 | 0.97  |
| RPL7      | 4 | -0.5527992 | 4.99E-41 | 9.11E-37   | 1     | 1     |
| LINC01503 | 4 | -0.5540636 | 1.27E-16 | 2.31E-12   | 0.295 | 0.676 |
| MT-ATP6   | 4 | -0.5583399 | 3.53E-19 | 6.45E-15   | 0.872 | 0.984 |
| SDC2      | 4 | -0.558545  | 1.32E-20 | 2.41E-16   | 0.833 | 0.97  |
| APOD      | 4 | -0.5639344 | 2.25E-12 | 4.11E-08   | 0.083 | 0.384 |
| MT-ND3    | 4 | -0.5652987 | 6.62E-19 | 1.21E-14   | 0.782 | 0.949 |
| CRTAP     | 4 | -0.5655987 | 1.85E-23 | 3.37E-19   | 0.577 | 0.895 |
| MSMP      | 4 | -0.5676365 | 5.01E-07 | 0.00914565 | 0.25  | 0.495 |
| MAGED1    | 4 | -0.5746685 | 6.80E-12 | 1.24E-07   | 0.224 | 0.535 |
| COL11A2   | 4 | -0.57791   | 2.57E-16 | 4.69E-12   | 0.34  | 0.692 |
| EEF2      | 4 | -0.6055837 | 1.55E-25 | 2.82E-21   | 0.981 | 1     |
| MIA       | 4 | -0.6083833 | 6.75E-20 | 1.23E-15   | 0.962 | 0.995 |
| MT-CYB    | 4 | -0.6091826 | 3.07E-19 | 5.59E-15   | 0.795 | 0.968 |
| XAGE2     | 4 | -0.6100593 | 3.55E-09 | 6.47E-05   | 0     | 0.195 |
| CXXC5     | 4 | -0.6179575 | 6.75E-27 | 1.23E-22   | 0.269 | 0.765 |
| B2M       | 4 | -0.6362634 | 1.73E-34 | 3.15E-30   | 0.987 | 0.997 |
| CD9       | 4 | -0.6702834 | 9.37E-18 | 1.71E-13   | 0.34  | 0.695 |
| RPS11     | 4 | -0.6703241 | 2.72E-47 | 4.96E-43   | 0.987 | 1     |
| ID4       | 4 | -0.6717303 | 4.49E-21 | 8.19E-17   | 0.494 | 0.841 |
| CRISPLD1  | 4 | -0.6824786 | 6.98E-16 | 1.27E-11   | 0.045 | 0.389 |
| ISLR      | 4 | -0.6891975 | 7.41E-25 | 1.35E-20   | 0.301 | 0.762 |
| THY1      | 4 | -0.6906273 | 4.59E-20 | 8.37E-16   | 0.564 | 0.878 |
| S100A1    | 4 | -0.6979945 | 1.07E-35 | 1.95E-31   | 0.981 | 1     |
| RPS20     | 4 | -0.7095159 | 1.67E-52 | 3.04E-48   | 0.994 | 1     |

| EEF1A1  | 4       | -0.7142991 | 3.08E-55 | 5.61E-51  | 1     | 1     |
|---------|---------|------------|----------|-----------|-------|-------|
| ZFP36L2 | 4       | -0.7154281 | 1.13E-18 | 2.06E-14  | 0.25  | 0.643 |
| CP      | 4       | -0.725528  | 4.99E-23 | 9.11E-19  | 0.487 | 0.841 |
| CITED2  | 4       | -0.725744  | 8.72E-18 | 1.59E-13  | 0.372 | 0.741 |
| LECT1   | 4       | -0.7344205 | 9.76E-19 | 1.78E-14  | 0.641 | 0.914 |
| ACAN    | 4       | -0.7390942 | 9.44E-33 | 1.72E-28  | 0.885 | 0.995 |
| ID2     | 4       | -0.7433489 | 1.37E-18 | 2.50E-14  | 0.449 | 0.808 |
| SLC40A1 | 4       | -0.7503005 | 1.08E-22 | 1.97E-18  | 0.096 | 0.562 |
| MT-ND2  | 4       | -0.7507559 | 2.09E-24 | 3.82E-20  | 0.679 | 0.919 |
| ID1     | 4       | -0.7705782 | 2.14E-19 | 3.90E-15  | 0.647 | 0.954 |
| FHL1    | 4       | -0.7724592 | 5.62E-25 | 1.03E-20  | 0.449 | 0.814 |
| NGFRAP1 | 4       | -0.8057047 | 6.86E-39 | 1.25E-34  | 0.692 | 0.97  |
| PAX1    | 4       | -0.8254583 | 2.84E-34 | 5.18E-30  | 0.474 | 0.911 |
| EIF3H   | 4       | -0.8290048 | 1.42E-47 | 2.58E-43  | 0.91  | 0.997 |
| PLAC9   | 4       | -0.8307514 | 1.28E-31 | 2.34E-27  | 0.744 | 0.986 |
| CRYAB   | 4       | -0.8532684 | 2.18E-25 | 3.97E-21  | 0.744 | 0.943 |
| IGFBP6  | 4       | -0.864261  | 2.09E-23 | 3.81E-19  | 0.481 | 0.822 |
| FBXO2   | 4       | -0.8645024 | 2.58E-36 | 4.70E-32  | 0.526 | 0.949 |
| DCN     | 4       | -0.8649619 | 2.98E-38 | 5.44E-34  | 1     | 1     |
| FTL     | 4       | -0.8667142 | 3.02E-55 | 5.50E-51  | 1     | 1     |
| TSC22D1 | 4       | -0.8669984 | 9.34E-23 | 1.70E-18  | 0.455 | 0.824 |
| PLPP1   | 4       | -0.89937   | 9.26E-32 | 1.69E-27  | 0.244 | 0.757 |
| OGN     | 4       | -0.9816686 | 3.31E-32 | 6.04E-28  | 0.917 | 0.997 |
| MGP     | 4       | -0.9919701 | 9.86E-34 | 1.80E-29  | 0.994 | 1     |
| FTH1    | 4       | -1.1053621 | 3.58E-56 | 6.53E-52  | 1     | 1     |
| SPTSSB  | 4       | -1.1422988 | 1.18E-27 | 2.15E-23  | 0.006 | 0.524 |
| ADIRF   | 4       | -1.1765738 | 9.81E-40 | 1.79E-35  | 0.256 | 0.841 |
| C2orf82 | 4       | -1.1951691 | 3.24E-43 | 5.91E-39  | 0.885 | 0.997 |
| CLEC3A  | 4       | -1.2100382 | 9.37E-37 | 1.71E-32  | 0.167 | 0.765 |
| SLPI    | 4       | -1.2201154 | 4.86E-33 | 8.86E-29  | 0.821 | 1     |
| FRZB    | 4       | -1.3775407 | 1.33E-29 | 2.42E-25  | 0.103 | 0.643 |
| CAPS    | 4       | -1.4418907 | 1.03E-48 | 1.88E-44  | 0.583 | 0.965 |
| gene    | cluster | avg_logFC  | p_val    | p_val_adj | pct.1 | pct.2 |
| SPP1    | 5       | 3.38171593 | 4.16E-76 | 7.60E-72  | 0.907 | 0.067 |
| PRG4    | 5       | 2.31426809 | 1.31E-56 | 2.39E-52  | 0.678 | 0.011 |
| MT2A    | 5       | 2.23114108 | 7.83E-55 | 1.43E-50  | 1     | 0.993 |
| COMP    | 5       | 1.79077044 | 7.13E-48 | 1.30E-43  | 0.956 | 0.528 |
| SOD2    | 5       | 1.70354017 | 2.77E-58 | 5.05E-54  | 1     | 0.856 |
| S100A2  | 5       | 1.53468767 | 3.38E-31 | 6.17E-27  | 0.688 | 0.197 |



|           |   |            |          |          |       |       |
|-----------|---|------------|----------|----------|-------|-------|
| UPP1      | 5 | 1.33610254 | 3.88E-65 | 7.08E-61 | 0.834 | 0.088 |
| FN1       | 5 | 1.30780515 | 4.13E-59 | 7.53E-55 | 1     | 0.996 |
| PTGS2     | 5 | 1.25173373 | 8.09E-64 | 1.48E-59 | 0.771 | 0.035 |
| CTSL      | 5 | 1.24655103 | 1.46E-35 | 2.67E-31 | 0.868 | 0.507 |
| IGFBP3    | 5 | 1.24425967 | 5.68E-43 | 1.04E-38 | 0.61  | 0.053 |
| TM4SF1    | 5 | 1.24040997 | 4.45E-33 | 8.13E-29 | 0.746 | 0.292 |
| VEGFA     | 5 | 1.18733923 | 5.98E-53 | 1.09E-48 | 0.878 | 0.25  |
| HMGA1     | 5 | 1.16797218 | 1.46E-49 | 2.67E-45 | 0.79  | 0.162 |
| MT1X      | 5 | 1.16619418 | 6.24E-19 | 1.14E-14 | 1     | 0.982 |
| DDIT4L    | 5 | 1.13448359 | 4.08E-42 | 7.45E-38 | 0.932 | 0.475 |
| BZW1      | 5 | 1.10591289 | 6.76E-51 | 1.23E-46 | 0.878 | 0.306 |
| CD55      | 5 | 1.07984601 | 7.82E-43 | 1.43E-38 | 0.917 | 0.479 |
| STK17A    | 5 | 1.0654876  | 1.94E-45 | 3.54E-41 | 0.693 | 0.099 |
| RGCC      | 5 | 1.06504192 | 7.47E-38 | 1.36E-33 | 0.917 | 0.479 |
| WTAP      | 5 | 1.04115354 | 4.43E-40 | 8.08E-36 | 0.917 | 0.468 |
| MMP3      | 5 | 1.02933857 | 1.06E-15 | 1.93E-11 | 0.888 | 0.665 |
| C11orf96  | 5 | 1.009128   | 3.46E-37 | 6.31E-33 | 0.551 | 0.046 |
| SERPINE2  | 5 | 1.00186513 | 5.71E-22 | 1.04E-17 | 1     | 0.996 |
| TIMP1     | 5 | 0.98971387 | 3.48E-15 | 6.36E-11 | 1     | 1     |
| MRPS6     | 5 | 0.97785532 | 2.02E-25 | 3.69E-21 | 0.976 | 0.923 |
| ERO1A     | 5 | 0.97187867 | 2.37E-40 | 4.32E-36 | 0.82  | 0.335 |
| ORM1      | 5 | 0.97130627 | 1.33E-09 | 2.43E-05 | 0.483 | 0.257 |
| TNFRSF12A | 5 | 0.96650967 | 1.55E-40 | 2.83E-36 | 0.663 | 0.116 |
| MIF       | 5 | 0.90748282 | 5.31E-67 | 9.68E-63 | 1     | 0.996 |
| ABI3BP    | 5 | 0.89617375 | 2.79E-26 | 5.09E-22 | 0.668 | 0.254 |
| BAALC     | 5 | 0.88558005 | 1.19E-25 | 2.18E-21 | 0.629 | 0.229 |
| PMP22     | 5 | 0.87084203 | 3.19E-36 | 5.82E-32 | 0.932 | 0.616 |
| BMP2      | 5 | 0.85659251 | 9.29E-33 | 1.70E-28 | 0.449 | 0.014 |
| RGS2      | 5 | 0.8492124  | 4.97E-14 | 9.06E-10 | 0.668 | 0.394 |
| TIMP3     | 5 | 0.8400105  | 1.71E-15 | 3.12E-11 | 0.82  | 0.553 |
| TGFBI     | 5 | 0.810982   | 6.05E-29 | 1.10E-24 | 0.541 | 0.102 |
| TREM1     | 5 | 0.80034426 | 4.72E-44 | 8.61E-40 | 0.546 | 0.004 |
| MT1G      | 5 | 0.7936158  | 9.29E-11 | 1.70E-06 | 0.932 | 0.792 |
| CHI3L2    | 5 | 0.78411273 | 6.71E-14 | 1.22E-09 | 0.756 | 0.525 |
| SMOX      | 5 | 0.77558873 | 2.19E-24 | 4.00E-20 | 0.571 | 0.18  |
| NDRG1     | 5 | 0.75564363 | 8.82E-33 | 1.61E-28 | 0.785 | 0.345 |
| SNHG12    | 5 | 0.7510462  | 2.37E-32 | 4.32E-28 | 0.737 | 0.289 |
| PPP3CA    | 5 | 0.74346098 | 1.02E-25 | 1.87E-21 | 0.922 | 0.616 |
| BHLHE40   | 5 | 0.72829457 | 4.06E-21 | 7.41E-17 | 0.707 | 0.352 |

|            |   |            |          |          |       |       |
|------------|---|------------|----------|----------|-------|-------|
| FAP        | 5 | 0.70171289 | 9.74E-43 | 1.78E-38 | 0.595 | 0.039 |
| SPRY2      | 5 | 0.70086672 | 2.00E-31 | 3.65E-27 | 0.493 | 0.046 |
| SLC3A2     | 5 | 0.697616   | 3.52E-18 | 6.43E-14 | 0.595 | 0.282 |
| ISG20      | 5 | 0.69405702 | 1.48E-23 | 2.69E-19 | 0.693 | 0.324 |
| NRP2       | 5 | 0.68727958 | 2.08E-29 | 3.80E-25 | 0.488 | 0.06  |
| DNER       | 5 | 0.67829187 | 1.10E-26 | 2.01E-22 | 0.741 | 0.31  |
| EIF4EBP1   | 5 | 0.67784512 | 1.36E-19 | 2.47E-15 | 0.698 | 0.391 |
| RNF145     | 5 | 0.67649793 | 2.79E-30 | 5.09E-26 | 0.634 | 0.158 |
| AK2        | 5 | 0.67573204 | 2.54E-28 | 4.63E-24 | 0.868 | 0.489 |
| SLC2A1     | 5 | 0.66463189 | 6.60E-25 | 1.20E-20 | 0.527 | 0.123 |
| TMSB10     | 5 | 0.66322505 | 3.34E-20 | 6.10E-16 | 1     | 0.982 |
| ZNF385D    | 5 | 0.6497981  | 4.69E-24 | 8.55E-20 | 0.756 | 0.38  |
| VAPA       | 5 | 0.63401671 | 1.82E-33 | 3.33E-29 | 0.99  | 0.856 |
| PPFIBP1    | 5 | 0.63330298 | 4.25E-23 | 7.76E-19 | 0.683 | 0.306 |
| CCDC85B    | 5 | 0.63126628 | 2.58E-16 | 4.71E-12 | 0.859 | 0.648 |
| MT1H       | 5 | 0.62431408 | 3.66E-09 | 6.67E-05 | 0.654 | 0.394 |
| KLF3       | 5 | 0.60395561 | 1.13E-19 | 2.06E-15 | 0.502 | 0.148 |
| RABGGTB    | 5 | 0.59422825 | 8.00E-27 | 1.46E-22 | 0.863 | 0.514 |
| DNAJB9     | 5 | 0.59376496 | 3.12E-16 | 5.69E-12 | 0.829 | 0.577 |
| PPP1CB     | 5 | 0.59217797 | 4.36E-15 | 7.96E-11 | 0.893 | 0.676 |
| NPR3       | 5 | 0.58235187 | 5.17E-27 | 9.44E-23 | 0.351 | 0     |
| TMEM45A    | 5 | 0.58150126 | 8.56E-17 | 1.56E-12 | 0.902 | 0.722 |
| PPP1R15A   | 5 | 0.57798615 | 1.18E-27 | 2.15E-23 | 0.532 | 0.102 |
| ZNF593     | 5 | 0.57640799 | 1.84E-23 | 3.35E-19 | 0.683 | 0.296 |
| PLA2G2A    | 5 | 0.57438223 | 2.15E-10 | 3.92E-06 | 0.766 | 0.553 |
| CSGALNACT2 | 5 | 0.57410911 | 4.84E-25 | 8.84E-21 | 0.507 | 0.102 |
| DDIT3      | 5 | 0.56817179 | 2.89E-13 | 5.28E-09 | 0.663 | 0.405 |
| HLA-DRB1   | 5 | 0.56690515 | 1.65E-25 | 3.01E-21 | 0.546 | 0.127 |
| IFRD1      | 5 | 0.55661097 | 5.15E-17 | 9.39E-13 | 0.712 | 0.444 |
| EMP3       | 5 | 0.55374819 | 2.86E-17 | 5.22E-13 | 0.907 | 0.754 |
| PLAUR      | 5 | 0.55088664 | 2.00E-17 | 3.65E-13 | 0.488 | 0.158 |
| SLC25A37   | 5 | 0.54910781 | 8.35E-21 | 1.52E-16 | 0.907 | 0.613 |
| GOLT1B     | 5 | 0.54337714 | 3.82E-21 | 6.98E-17 | 0.576 | 0.204 |
| SGIP1      | 5 | 0.54209024 | 1.32E-23 | 2.40E-19 | 0.327 | 0.007 |
| PTP4A1     | 5 | 0.54107564 | 7.35E-16 | 1.34E-11 | 0.649 | 0.377 |
| RNF114     | 5 | 0.53585692 | 8.03E-24 | 1.47E-19 | 0.8   | 0.493 |
| CCND1      | 5 | 0.5344311  | 4.06E-24 | 7.40E-20 | 0.434 | 0.06  |
| FNIP2      | 5 | 0.5330283  | 3.07E-20 | 5.59E-16 | 0.483 | 0.123 |
| ADSS       | 5 | 0.53275867 | 6.34E-18 | 1.16E-13 | 0.717 | 0.398 |

|          |   |            |          |            |       |       |
|----------|---|------------|----------|------------|-------|-------|
| EIF1     | 5 | 0.53031729 | 1.25E-40 | 2.29E-36   | 1     | 1     |
| ATP6V1G1 | 5 | 0.52586096 | 1.59E-25 | 2.91E-21   | 0.99  | 0.937 |
| SERPINA1 | 5 | 0.52410265 | 9.62E-10 | 1.76E-05   | 0.98  | 1     |
| GBE1     | 5 | 0.51947601 | 1.08E-15 | 1.97E-11   | 0.766 | 0.514 |
| ARF6     | 5 | 0.51752376 | 3.16E-16 | 5.77E-12   | 0.678 | 0.401 |
| SLC20A1  | 5 | 0.51531857 | 3.57E-21 | 6.51E-17   | 0.429 | 0.081 |
| S100A16  | 5 | 0.50779694 | 5.62E-14 | 1.03E-09   | 0.454 | 0.169 |
| RELB     | 5 | 0.49991757 | 8.34E-24 | 1.52E-19   | 0.41  | 0.046 |
| CLIC4    | 5 | 0.49973353 | 4.81E-15 | 8.77E-11   | 0.629 | 0.363 |
| WDR45B   | 5 | 0.4981187  | 5.76E-19 | 1.05E-14   | 0.532 | 0.173 |
| GPX1     | 5 | 0.49374671 | 9.78E-19 | 1.79E-14   | 0.932 | 0.746 |
| MED21    | 5 | 0.49241247 | 7.52E-19 | 1.37E-14   | 0.629 | 0.275 |
| FAM162A  | 5 | 0.4905545  | 2.50E-20 | 4.55E-16   | 0.941 | 0.754 |
| PID1     | 5 | 0.48815705 | 1.19E-12 | 2.18E-08   | 0.673 | 0.437 |
| SH3BGRL3 | 5 | 0.48745173 | 9.19E-22 | 1.68E-17   | 1     | 0.968 |
| NTMT1    | 5 | 0.48545266 | 1.81E-18 | 3.30E-14   | 0.551 | 0.197 |
| XBP1     | 5 | 0.4830154  | 1.87E-13 | 3.42E-09   | 0.746 | 0.472 |
| GPRC5A   | 5 | 0.48196851 | 1.23E-22 | 2.25E-18   | 0.429 | 0.063 |
| CDC37L1  | 5 | 0.47738642 | 6.60E-20 | 1.20E-15   | 0.615 | 0.246 |
| GDF15    | 5 | 0.47664873 | 7.59E-11 | 1.38E-06   | 0.185 | 0.018 |
| GSTO1    | 5 | 0.47651911 | 1.08E-14 | 1.97E-10   | 0.829 | 0.602 |
| WSB1     | 5 | 0.47480989 | 2.43E-13 | 4.43E-09   | 0.859 | 0.623 |
| TRMT112  | 5 | 0.47471827 | 3.47E-20 | 6.34E-16   | 0.927 | 0.887 |
| WDR33    | 5 | 0.47082215 | 1.79E-15 | 3.27E-11   | 0.659 | 0.373 |
| VIMP     | 5 | 0.46740999 | 2.05E-17 | 3.74E-13   | 0.893 | 0.609 |
| GRB10    | 5 | 0.46648869 | 4.19E-23 | 7.65E-19   | 0.312 | 0.004 |
| ENO2     | 5 | 0.4648007  | 1.60E-18 | 2.91E-14   | 0.61  | 0.257 |
| RHOD     | 5 | 0.46402449 | 8.58E-18 | 1.56E-13   | 0.566 | 0.218 |
| CTHRC1   | 5 | 0.4578918  | 1.87E-16 | 3.41E-12   | 0.371 | 0.074 |
| TMEM38B  | 5 | 0.45658444 | 5.10E-15 | 9.30E-11   | 0.673 | 0.37  |
| PFDN2    | 5 | 0.45461697 | 1.01E-16 | 1.84E-12   | 0.776 | 0.496 |
| EIF5     | 5 | 0.45434543 | 4.37E-15 | 7.97E-11   | 0.756 | 0.458 |
| SLC5A3   | 5 | 0.44497837 | 5.58E-07 | 0.01018817 | 0.532 | 0.366 |
| CLK1     | 5 | 0.44326198 | 8.42E-15 | 1.54E-10   | 0.712 | 0.426 |
| IER3     | 5 | 0.44268853 | 1.63E-15 | 2.98E-11   | 0.371 | 0.085 |
| COX7A2   | 5 | 0.4415765  | 1.09E-22 | 1.99E-18   | 0.985 | 0.954 |
| EPS8     | 5 | 0.43622075 | 3.99E-19 | 7.28E-15   | 0.488 | 0.137 |
| FOSL1    | 5 | 0.43063488 | 3.43E-17 | 6.25E-13   | 0.278 | 0.021 |
| SERPINE1 | 5 | 0.42928187 | 3.70E-19 | 6.75E-15   | 0.332 | 0.035 |

|         |   |            |          |            |       |       |
|---------|---|------------|----------|------------|-------|-------|
| NT5E    | 5 | 0.42926383 | 1.17E-14 | 2.13E-10   | 0.449 | 0.144 |
| DAB2    | 5 | 0.42618338 | 3.87E-11 | 7.06E-07   | 0.429 | 0.176 |
| CD44    | 5 | 0.42593128 | 6.02E-15 | 1.10E-10   | 0.907 | 0.725 |
| ANXA5   | 5 | 0.42579772 | 5.03E-13 | 9.18E-09   | 0.878 | 0.732 |
| CRLF1   | 5 | 0.42411132 | 8.14E-17 | 1.48E-12   | 0.415 | 0.099 |
| SAR1A   | 5 | 0.41847663 | 3.53E-15 | 6.44E-11   | 0.673 | 0.373 |
| ARPP19  | 5 | 0.41750422 | 3.39E-13 | 6.18E-09   | 0.688 | 0.44  |
| BCAT1   | 5 | 0.41467487 | 7.74E-12 | 1.41E-07   | 0.741 | 0.475 |
| PDE4B   | 5 | 0.41457181 | 1.94E-19 | 3.53E-15   | 0.41  | 0.074 |
| NBPF14  | 5 | 0.41379497 | 1.21E-17 | 2.21E-13   | 0.38  | 0.074 |
| NOL7    | 5 | 0.41315639 | 6.51E-13 | 1.19E-08   | 0.683 | 0.437 |
| SH3GLB1 | 5 | 0.41057352 | 5.35E-15 | 9.76E-11   | 0.795 | 0.525 |
| HMGA2   | 5 | 0.41004738 | 6.77E-24 | 1.23E-19   | 0.322 | 0.004 |
| SIVA1   | 5 | 0.40775998 | 5.12E-11 | 9.34E-07   | 0.932 | 0.789 |
| TMSB4X  | 5 | 0.40510158 | 1.09E-06 | 0.01996852 | 0.8   | 0.683 |
| CHMP4B  | 5 | 0.40503278 | 1.10E-12 | 2.02E-08   | 0.693 | 0.43  |
| SELK    | 5 | 0.4029739  | 6.84E-15 | 1.25E-10   | 0.927 | 0.75  |
| PHLDA1  | 5 | 0.40228653 | 2.01E-19 | 3.66E-15   | 0.307 | 0.021 |
| SVIP    | 5 | 0.3983941  | 6.25E-15 | 1.14E-10   | 0.678 | 0.363 |
| RHEB    | 5 | 0.39785962 | 2.19E-12 | 4.00E-08   | 0.888 | 0.697 |
| TGM2    | 5 | 0.397211   | 4.89E-14 | 8.92E-10   | 0.395 | 0.113 |
| COX17   | 5 | 0.39526909 | 6.04E-12 | 1.10E-07   | 0.844 | 0.637 |
| VDAC1   | 5 | 0.3942835  | 7.51E-12 | 1.37E-07   | 0.868 | 0.761 |
| SQSTM1  | 5 | 0.39368243 | 9.75E-15 | 1.78E-10   | 0.98  | 0.877 |
| ARF4    | 5 | 0.39265563 | 1.68E-09 | 3.06E-05   | 0.849 | 0.655 |
| PELI1   | 5 | 0.38658888 | 4.22E-15 | 7.71E-11   | 0.332 | 0.063 |
| ZFAND5  | 5 | 0.38337517 | 6.21E-10 | 1.13E-05   | 0.61  | 0.401 |
| SEC61G  | 5 | 0.38331414 | 8.82E-11 | 1.61E-06   | 1     | 0.986 |
| DNAJB1  | 5 | 0.38244286 | 2.25E-08 | 0.00041078 | 0.341 | 0.141 |
| POMP    | 5 | 0.37868104 | 1.01E-15 | 1.85E-11   | 0.932 | 0.718 |
| S100A10 | 5 | 0.37861826 | 1.39E-09 | 2.53E-05   | 1     | 0.982 |
| EIF4A2  | 5 | 0.37822878 | 7.30E-23 | 1.33E-18   | 1     | 1     |
| CRTAC1  | 5 | 0.37656527 | 4.88E-20 | 8.91E-16   | 0.307 | 0.018 |
| C4orf48 | 5 | 0.37532116 | 4.81E-14 | 8.77E-10   | 0.434 | 0.141 |
| CLDND1  | 5 | 0.37006998 | 4.42E-11 | 8.06E-07   | 0.541 | 0.289 |
| EIF1B   | 5 | 0.36890202 | 3.42E-13 | 6.25E-09   | 0.839 | 0.665 |
| GAPDH   | 5 | 0.36831558 | 8.19E-16 | 1.49E-11   | 1     | 1     |
| UBE2B   | 5 | 0.36647993 | 3.17E-10 | 5.79E-06   | 0.834 | 0.658 |
| COPS2   | 5 | 0.36245832 | 9.06E-10 | 1.65E-05   | 0.751 | 0.56  |

|            |   |            |          |            |       |       |
|------------|---|------------|----------|------------|-------|-------|
| RHOC       | 5 | 0.36205065 | 3.26E-07 | 0.00594986 | 0.834 | 0.725 |
| SFT2D1     | 5 | 0.36124129 | 1.75E-11 | 3.20E-07   | 0.8   | 0.563 |
| METAP2     | 5 | 0.36068473 | 5.06E-12 | 9.24E-08   | 0.854 | 0.623 |
| SH3BP5     | 5 | 0.36049624 | 1.42E-10 | 2.59E-06   | 0.507 | 0.254 |
| AEBP1      | 5 | 0.3583075  | 4.36E-09 | 7.96E-05   | 0.727 | 0.493 |
| NDUFB8     | 5 | 0.35820251 | 1.96E-08 | 0.00035843 | 0.844 | 0.715 |
| SNRNP27    | 5 | 0.35762917 | 4.57E-10 | 8.33E-06   | 0.507 | 0.278 |
| RNMT       | 5 | 0.35552306 | 2.82E-12 | 5.14E-08   | 0.605 | 0.317 |
| ZFYVE16    | 5 | 0.35449234 | 2.30E-13 | 4.20E-09   | 0.346 | 0.092 |
| CNIH1      | 5 | 0.35267441 | 1.57E-11 | 2.86E-07   | 0.834 | 0.644 |
| ATP6V1C1   | 5 | 0.35263251 | 4.61E-14 | 8.42E-10   | 0.454 | 0.158 |
| PPP1R14C   | 5 | 0.34589847 | 1.54E-16 | 2.81E-12   | 0.317 | 0.042 |
| USMG5      | 5 | 0.34438456 | 3.49E-14 | 6.37E-10   | 0.971 | 0.891 |
| MRPL54     | 5 | 0.3431426  | 7.57E-12 | 1.38E-07   | 0.605 | 0.327 |
| UFM1       | 5 | 0.3422579  | 3.01E-09 | 5.50E-05   | 0.659 | 0.447 |
| TVP23B     | 5 | 0.34187971 | 3.10E-10 | 5.66E-06   | 0.532 | 0.282 |
| GULP1      | 5 | 0.33846442 | 1.35E-14 | 2.47E-10   | 0.385 | 0.099 |
| PTGES3     | 5 | 0.33820431 | 1.18E-16 | 2.15E-12   | 0.99  | 0.954 |
| RNF126     | 5 | 0.338049   | 5.81E-13 | 1.06E-08   | 0.42  | 0.148 |
| SPAG9      | 5 | 0.3375923  | 3.42E-12 | 6.23E-08   | 0.444 | 0.173 |
| RAB13      | 5 | 0.33700055 | 8.30E-11 | 1.51E-06   | 0.902 | 0.778 |
| IL11       | 5 | 0.33647224 | 4.71E-14 | 8.60E-10   | 0.185 | 0     |
| TMOD1      | 5 | 0.3361511  | 7.52E-16 | 1.37E-11   | 0.278 | 0.028 |
| LGALS3     | 5 | 0.3360416  | 2.29E-08 | 0.00041838 | 0.966 | 0.93  |
| RPF2       | 5 | 0.33174462 | 1.85E-09 | 3.38E-05   | 0.415 | 0.183 |
| MTHFD2     | 5 | 0.33067754 | 8.95E-08 | 0.0016334  | 0.732 | 0.588 |
| CXCL8      | 5 | 0.32941849 | 4.52E-08 | 0.00082499 | 0.146 | 0.018 |
| AKIRIN2    | 5 | 0.32910398 | 7.81E-12 | 1.43E-07   | 0.361 | 0.116 |
| GRPEL1     | 5 | 0.32888397 | 6.10E-12 | 1.11E-07   | 0.449 | 0.176 |
| PGK1       | 5 | 0.32791548 | 6.05E-09 | 0.00011032 | 0.941 | 0.831 |
| NT5C3A     | 5 | 0.32596426 | 2.66E-10 | 4.85E-06   | 0.376 | 0.144 |
| PAIP2      | 5 | 0.32255129 | 8.22E-10 | 1.50E-05   | 0.8   | 0.613 |
| CAPZA2     | 5 | 0.32240554 | 2.76E-10 | 5.04E-06   | 0.8   | 0.563 |
| GADD45GIP1 | 5 | 0.32116041 | 4.93E-09 | 8.99E-05   | 0.824 | 0.63  |
| CTTN       | 5 | 0.32084916 | 3.45E-08 | 0.00062907 | 0.507 | 0.289 |
| RGS16      | 5 | 0.32021712 | 1.75E-06 | 0.0320055  | 0.302 | 0.13  |
| POPDC3     | 5 | 0.31955398 | 2.93E-12 | 5.34E-08   | 0.341 | 0.095 |
| ATP6V0E1   | 5 | 0.31862028 | 1.38E-10 | 2.52E-06   | 0.912 | 0.813 |
| BTG3       | 5 | 0.31780095 | 2.77E-08 | 0.00050528 | 0.459 | 0.257 |

|            |   |            |          |            |       |       |
|------------|---|------------|----------|------------|-------|-------|
| YAF2       | 5 | 0.3173062  | 4.78E-10 | 8.72E-06   | 0.42  | 0.18  |
| SQRDL      | 5 | 0.31639481 | 4.99E-10 | 9.11E-06   | 0.317 | 0.102 |
| CHMP4A     | 5 | 0.31526897 | 4.22E-09 | 7.70E-05   | 0.668 | 0.479 |
| CA9        | 5 | 0.31387952 | 6.33E-09 | 0.00011541 | 0.346 | 0.137 |
| NDUFB4     | 5 | 0.31240891 | 1.51E-09 | 2.75E-05   | 0.902 | 0.792 |
| SAP18      | 5 | 0.31161307 | 3.85E-10 | 7.03E-06   | 0.893 | 0.778 |
| MRPL14     | 5 | 0.30985344 | 1.50E-09 | 2.73E-05   | 0.624 | 0.394 |
| ACTR3      | 5 | 0.30958962 | 3.12E-08 | 0.00056852 | 0.576 | 0.37  |
| HDAC2      | 5 | 0.3085292  | 1.11E-08 | 0.00020265 | 0.541 | 0.327 |
| YWHAE      | 5 | 0.30816624 | 2.99E-09 | 5.46E-05   | 0.951 | 0.856 |
| SYF2       | 5 | 0.3070735  | 1.77E-08 | 0.00032283 | 0.912 | 0.799 |
| HNRNPDL    | 5 | 0.30688811 | 9.98E-09 | 0.00018213 | 0.839 | 0.669 |
| ITGA5      | 5 | 0.30576155 | 1.91E-14 | 3.48E-10   | 0.307 | 0.053 |
| DYNLT3     | 5 | 0.30526738 | 9.64E-07 | 0.01758878 | 0.698 | 0.542 |
| C2orf49    | 5 | 0.30445805 | 8.05E-11 | 1.47E-06   | 0.39  | 0.144 |
| NAMPT      | 5 | 0.30286854 | 1.10E-09 | 2.01E-05   | 0.615 | 0.37  |
| KDM7A      | 5 | 0.30219404 | 2.25E-12 | 4.10E-08   | 0.268 | 0.049 |
| PLCG2      | 5 | 0.30211304 | 4.80E-10 | 8.77E-06   | 0.224 | 0.042 |
| AC090498.1 | 5 | 0.30177466 | 1.70E-20 | 3.10E-16   | 1     | 1     |
| ZFAND2A    | 5 | 0.30048517 | 1.42E-14 | 2.59E-10   | 0.39  | 0.099 |
| UBE2I      | 5 | 0.29920084 | 3.11E-08 | 0.00056759 | 0.741 | 0.577 |
| MRPL41     | 5 | 0.2981073  | 1.23E-07 | 0.00225263 | 0.741 | 0.577 |
| LSM12      | 5 | 0.29663664 | 3.05E-09 | 5.56E-05   | 0.429 | 0.201 |
| IMP4       | 5 | 0.29643191 | 1.50E-09 | 2.74E-05   | 0.498 | 0.254 |
| S100A6     | 5 | 0.29613993 | 1.64E-08 | 0.00029868 | 1     | 1     |
| FERMT2     | 5 | 0.29586623 | 5.30E-09 | 9.67E-05   | 0.488 | 0.254 |
| ADRM1      | 5 | 0.2957006  | 1.39E-09 | 2.54E-05   | 0.493 | 0.254 |
| TMEM167A   | 5 | 0.29540161 | 1.93E-07 | 0.0035167  | 0.766 | 0.574 |
| TFPI       | 5 | 0.29529746 | 2.97E-12 | 5.42E-08   | 0.263 | 0.046 |
| NDUFA6     | 5 | 0.29505672 | 2.89E-07 | 0.00527119 | 0.62  | 0.423 |
| LARP6      | 5 | 0.29376832 | 2.20E-06 | 0.04018465 | 0.644 | 0.486 |
| KITLG      | 5 | 0.29338809 | 2.90E-12 | 5.30E-08   | 0.327 | 0.081 |
| AIMP1      | 5 | 0.29335267 | 2.57E-06 | 0.04695    | 0.688 | 0.567 |
| CDV3       | 5 | 0.29206271 | 6.49E-10 | 1.18E-05   | 0.546 | 0.299 |
| MED10      | 5 | 0.29206271 | 1.50E-09 | 2.74E-05   | 0.546 | 0.306 |
| NDUFS5     | 5 | 0.29091394 | 2.25E-10 | 4.10E-06   | 0.951 | 0.824 |
| GSTM3      | 5 | 0.29045757 | 1.12E-09 | 2.04E-05   | 0.4   | 0.162 |
| RIPK2      | 5 | 0.29041932 | 5.09E-11 | 9.29E-07   | 0.332 | 0.099 |
| SNU13      | 5 | 0.29024618 | 2.06E-08 | 0.00037655 | 0.898 | 0.778 |

|           |   |            |          |            |       |       |
|-----------|---|------------|----------|------------|-------|-------|
| MRPL57    | 5 | 0.28964742 | 1.58E-07 | 0.0028861  | 0.849 | 0.725 |
| MRPL52    | 5 | 0.28740527 | 6.90E-07 | 0.01258209 | 0.566 | 0.391 |
| FAM207A   | 5 | 0.28685313 | 4.22E-09 | 7.70E-05   | 0.473 | 0.239 |
| CGGBP1    | 5 | 0.28674355 | 1.18E-08 | 0.00021492 | 0.585 | 0.345 |
| CCDC174   | 5 | 0.286299   | 1.43E-08 | 0.00026051 | 0.444 | 0.222 |
| SLC25A36  | 5 | 0.28321309 | 1.83E-08 | 0.00033303 | 0.605 | 0.356 |
| PRKRA     | 5 | 0.28242345 | 8.39E-08 | 0.00153014 | 0.527 | 0.32  |
| TRAM1     | 5 | 0.28115024 | 1.21E-06 | 0.02208804 | 0.82  | 0.725 |
| ACVR1     | 5 | 0.2805626  | 3.30E-07 | 0.00601693 | 0.483 | 0.285 |
| MRPL51    | 5 | 0.27944424 | 9.25E-08 | 0.00168744 | 0.873 | 0.722 |
| GYPE      | 5 | 0.27828684 | 1.41E-07 | 0.0025686  | 0.639 | 0.398 |
| GNAI3     | 5 | 0.27730601 | 3.66E-09 | 6.68E-05   | 0.512 | 0.268 |
| LRRFIP1   | 5 | 0.27650363 | 1.81E-06 | 0.03300477 | 0.42  | 0.236 |
| NOP10     | 5 | 0.27625394 | 4.64E-07 | 0.00846582 | 0.785 | 0.62  |
| ACTR10    | 5 | 0.27575556 | 1.22E-06 | 0.02221718 | 0.488 | 0.306 |
| EVI2A     | 5 | 0.27467096 | 2.15E-12 | 3.93E-08   | 0.273 | 0.049 |
| SREK1IP1  | 5 | 0.27265571 | 3.46E-08 | 0.00063146 | 0.454 | 0.236 |
| OSER1     | 5 | 0.27265571 | 1.35E-06 | 0.02458271 | 0.439 | 0.254 |
| AKAP12    | 5 | 0.27134317 | 7.00E-08 | 0.00127681 | 0.22  | 0.06  |
| ABI1      | 5 | 0.27127437 | 7.03E-09 | 0.00012827 | 0.454 | 0.225 |
| MRPL36    | 5 | 0.2706738  | 3.62E-08 | 0.00066029 | 0.571 | 0.352 |
| CAMK2D    | 5 | 0.26952295 | 8.18E-08 | 0.0014921  | 0.341 | 0.148 |
| SEMA3A    | 5 | 0.26921144 | 7.84E-15 | 1.43E-10   | 0.249 | 0.021 |
| UBQLN1    | 5 | 0.26898682 | 9.10E-10 | 1.66E-05   | 0.356 | 0.13  |
| RAB14     | 5 | 0.26849291 | 1.37E-07 | 0.00249259 | 0.478 | 0.271 |
| PTBP3     | 5 | 0.26629193 | 5.12E-11 | 9.33E-07   | 0.39  | 0.137 |
| LINC00493 | 5 | 0.26608076 | 3.19E-08 | 0.00058216 | 0.937 | 0.803 |
| TNS1      | 5 | 0.26533964 | 1.67E-13 | 3.04E-09   | 0.322 | 0.067 |
| SLC7A2    | 5 | 0.2618854  | 2.48E-11 | 4.53E-07   | 0.2   | 0.021 |
| KLHL21    | 5 | 0.25927288 | 1.19E-11 | 2.17E-07   | 0.307 | 0.074 |
| RHOF      | 5 | 0.25927288 | 2.15E-08 | 0.0003923  | 0.263 | 0.081 |
| PPDPF     | 5 | 0.25728524 | 1.09E-11 | 1.99E-07   | 1     | 1     |
| PHF1      | 5 | 0.25662957 | 2.55E-06 | 0.04653709 | 0.556 | 0.37  |
| EMC2      | 5 | 0.25609458 | 1.70E-06 | 0.03105296 | 0.624 | 0.433 |
| CPEB4     | 5 | 0.25505629 | 1.14E-07 | 0.0020835  | 0.356 | 0.162 |
| NDUFC1    | 5 | 0.25501252 | 3.08E-07 | 0.00562255 | 0.917 | 0.824 |
| CGRRF1    | 5 | 0.25439407 | 3.53E-08 | 0.00064363 | 0.341 | 0.137 |
| RND3      | 5 | 0.25424895 | 6.76E-13 | 1.23E-08   | 0.215 | 0.018 |
| BNIP3     | 5 | 0.25422689 | 7.13E-08 | 0.00130077 | 1     | 1     |

|             |   |            |          |            |       |       |
|-------------|---|------------|----------|------------|-------|-------|
| SNRPG       | 5 | 0.25011564 | 5.48E-07 | 0.01000713 | 0.776 | 0.57  |
| EIF2A       | 5 | -0.2509231 | 2.24E-06 | 0.04093885 | 0.673 | 0.792 |
| TPGS2       | 5 | -0.2518968 | 2.94E-09 | 5.37E-05   | 0.083 | 0.303 |
| MPP6        | 5 | -0.2521136 | 6.03E-09 | 0.00010997 | 0.107 | 0.331 |
| PPM1K       | 5 | -0.2522239 | 5.59E-09 | 0.00010195 | 0.068 | 0.275 |
| MATN4       | 5 | -0.2530696 | 5.99E-09 | 0.00010935 | 0.107 | 0.338 |
| HNRNPM      | 5 | -0.2541768 | 3.16E-08 | 0.00057652 | 0.185 | 0.415 |
| SERTAD4-AS1 | 5 | -0.2549857 | 1.37E-13 | 2.50E-09   | 0.024 | 0.285 |
| PIGT        | 5 | -0.2550656 | 4.67E-10 | 8.53E-06   | 0.102 | 0.349 |
| CHST12      | 5 | -0.2551437 | 4.86E-12 | 8.87E-08   | 0.049 | 0.299 |
| SLC38A1     | 5 | -0.2559573 | 5.59E-09 | 0.00010192 | 0.093 | 0.313 |
| TMED4       | 5 | -0.2568634 | 1.98E-06 | 0.03621199 | 0.307 | 0.507 |
| TCTN1       | 5 | -0.2568719 | 8.55E-11 | 1.56E-06   | 0.088 | 0.338 |
| C9orf3      | 5 | -0.2580559 | 3.58E-08 | 0.00065269 | 0.21  | 0.447 |
| SNHG25      | 5 | -0.2582888 | 5.19E-07 | 0.00946902 | 0.195 | 0.398 |
| DUT         | 5 | -0.258459  | 6.68E-07 | 0.01218888 | 0.459 | 0.655 |
| KHDRBS3     | 5 | -0.2592351 | 2.29E-10 | 4.18E-06   | 0.034 | 0.246 |
| PHB2        | 5 | -0.2593344 | 8.38E-07 | 0.01529913 | 0.38  | 0.581 |
| SLC25A6     | 5 | -0.2606552 | 6.18E-11 | 1.13E-06   | 0.99  | 0.996 |
| SNRPA       | 5 | -0.2622833 | 1.43E-09 | 2.61E-05   | 0.141 | 0.391 |
| CYB5R1      | 5 | -0.263252  | 4.92E-09 | 8.99E-05   | 0.127 | 0.356 |
| OTOS        | 5 | -0.2642885 | 1.07E-08 | 0.00019529 | 0.083 | 0.292 |
| CD320       | 5 | -0.2644378 | 5.73E-07 | 0.01045573 | 0.288 | 0.507 |
| RARRES3     | 5 | -0.2644644 | 1.61E-10 | 2.93E-06   | 0.024 | 0.229 |
| C12orf57    | 5 | -0.264922  | 9.01E-09 | 0.00016437 | 0.966 | 0.993 |
| PNKD        | 5 | -0.2667785 | 1.38E-07 | 0.0025196  | 0.161 | 0.37  |
| RPL27A      | 5 | -0.2668779 | 4.77E-27 | 8.71E-23   | 1     | 1     |
| CDKN2C      | 5 | -0.267948  | 1.91E-11 | 3.48E-07   | 0.054 | 0.296 |
| SMIM19      | 5 | -0.2684835 | 3.37E-07 | 0.0061515  | 0.254 | 0.458 |
| SOCS3       | 5 | -0.2685923 | 3.67E-09 | 6.70E-05   | 0.083 | 0.306 |
| CANX        | 5 | -0.2692025 | 1.33E-06 | 0.02429547 | 0.615 | 0.782 |
| ARL6IP4     | 5 | -0.2694621 | 9.15E-10 | 1.67E-05   | 0.844 | 0.937 |
| PRSS23      | 5 | -0.2698546 | 2.39E-06 | 0.04368162 | 0.161 | 0.349 |
| SNHG8       | 5 | -0.2703835 | 1.00E-09 | 1.83E-05   | 0.883 | 0.937 |
| PCOLCE2     | 5 | -0.2703996 | 3.70E-07 | 0.00675392 | 0.932 | 0.975 |
| ARL2BP      | 5 | -0.2710686 | 5.68E-07 | 0.0103665  | 0.371 | 0.57  |
| ARPC1A      | 5 | -0.2718727 | 2.99E-07 | 0.00544975 | 0.322 | 0.532 |
| LRRC2       | 5 | -0.2725333 | 3.31E-09 | 6.05E-05   | 0.088 | 0.31  |
| FAM20C      | 5 | -0.2743696 | 1.42E-10 | 2.59E-06   | 0.063 | 0.296 |



|            |   |            |          |            |       |       |
|------------|---|------------|----------|------------|-------|-------|
| TMED2      | 5 | -0.2747496 | 1.36E-08 | 0.00024778 | 0.712 | 0.866 |
| RPL35A     | 5 | -0.2754589 | 9.60E-28 | 1.75E-23   | 1     | 1     |
| NDRG2      | 5 | -0.2776431 | 3.44E-12 | 6.28E-08   | 0.054 | 0.306 |
| ZFAND1     | 5 | -0.2786552 | 4.10E-07 | 0.00748358 | 0.468 | 0.655 |
| TMED9      | 5 | -0.2787042 | 1.09E-07 | 0.00198142 | 0.463 | 0.683 |
| EIF3E      | 5 | -0.2787897 | 4.46E-12 | 8.14E-08   | 1     | 1     |
| OXA1L      | 5 | -0.2793667 | 1.14E-07 | 0.00207612 | 0.459 | 0.644 |
| TPM2       | 5 | -0.2796171 | 7.60E-07 | 0.01386989 | 0.395 | 0.592 |
| IDH2       | 5 | -0.2797365 | 5.50E-14 | 1.00E-09   | 0.02  | 0.278 |
| CSGALNACT1 | 5 | -0.2805487 | 1.86E-10 | 3.40E-06   | 0.132 | 0.398 |
| DAAM1      | 5 | -0.2808548 | 2.40E-06 | 0.04384379 | 0.215 | 0.412 |
| RPL21      | 5 | -0.2810222 | 2.03E-32 | 3.70E-28   | 1     | 1     |
| ATP5D      | 5 | -0.281367  | 3.30E-09 | 6.02E-05   | 0.824 | 0.919 |
| SUMF2      | 5 | -0.2814161 | 1.86E-08 | 0.00033899 | 0.298 | 0.542 |
| LUC7L3     | 5 | -0.2818984 | 7.56E-10 | 1.38E-05   | 0.2   | 0.472 |
| NKX3-2     | 5 | -0.2819183 | 3.21E-12 | 5.86E-08   | 0.015 | 0.239 |
| EIF3D      | 5 | -0.2820891 | 2.37E-08 | 0.00043217 | 0.663 | 0.838 |
| PRKCDBP    | 5 | -0.2826762 | 1.53E-08 | 0.00027974 | 0.302 | 0.542 |
| GADD45B    | 5 | -0.2830307 | 6.13E-07 | 0.01119028 | 0.151 | 0.352 |
| NME4       | 5 | -0.2841477 | 6.93E-10 | 1.26E-05   | 0.176 | 0.437 |
| LRP10      | 5 | -0.286167  | 1.33E-08 | 0.00024221 | 0.2   | 0.437 |
| ANG        | 5 | -0.2866684 | 1.53E-09 | 2.79E-05   | 0.22  | 0.482 |
| RPL35      | 5 | -0.286888  | 3.50E-23 | 6.39E-19   | 1     | 1     |
| NINJ1      | 5 | -0.2870235 | 2.03E-07 | 0.00369749 | 0.449 | 0.63  |
| ABHD14B    | 5 | -0.2871402 | 7.20E-09 | 0.00013136 | 0.215 | 0.458 |
| BGN        | 5 | -0.2881224 | 8.89E-09 | 0.00016221 | 1     | 1     |
| COX7A2L    | 5 | -0.288562  | 5.14E-10 | 9.38E-06   | 0.82  | 0.919 |
| HIST1H2AC  | 5 | -0.2891054 | 4.41E-10 | 8.05E-06   | 0.112 | 0.359 |
| NHP2       | 5 | -0.2895099 | 3.05E-10 | 5.57E-06   | 0.278 | 0.563 |
| PRKCSH     | 5 | -0.2899244 | 3.37E-08 | 0.00061463 | 0.259 | 0.489 |
| HOXB8      | 5 | -0.2901262 | 1.99E-14 | 3.63E-10   | 0.02  | 0.285 |
| SLC1A5     | 5 | -0.2920623 | 2.57E-12 | 4.69E-08   | 0.083 | 0.359 |
| UMAD1      | 5 | -0.2942762 | 3.95E-08 | 0.00072151 | 0.215 | 0.433 |
| CMPK1      | 5 | -0.2946796 | 5.90E-10 | 1.08E-05   | 0.639 | 0.863 |
| NFIC       | 5 | -0.295724  | 6.13E-10 | 1.12E-05   | 0.215 | 0.479 |
| CNPY3      | 5 | -0.2957969 | 1.58E-09 | 2.88E-05   | 0.205 | 0.458 |
| RBMX       | 5 | -0.2968509 | 2.29E-06 | 0.04172072 | 0.551 | 0.722 |
| TMEM59     | 5 | -0.2972551 | 2.76E-12 | 5.04E-08   | 0.971 | 0.996 |
| YBX1       | 5 | -0.2974044 | 1.90E-13 | 3.47E-09   | 0.966 | 0.993 |

|           |   |            |          |            |       |       |
|-----------|---|------------|----------|------------|-------|-------|
| MORF4L2   | 5 | -0.2975553 | 1.26E-08 | 0.00022953 | 0.532 | 0.729 |
| RPL18A    | 5 | -0.2977042 | 1.29E-30 | 2.35E-26   | 1     | 1     |
| NPM1      | 5 | -0.297708  | 4.00E-15 | 7.30E-11   | 0.995 | 0.996 |
| CREG1     | 5 | -0.3005409 | 2.14E-08 | 0.00039037 | 0.478 | 0.669 |
| IER2      | 5 | -0.3005589 | 1.24E-07 | 0.00225674 | 0.166 | 0.384 |
| TRPS1     | 5 | -0.3006222 | 7.61E-11 | 1.39E-06   | 0.205 | 0.493 |
| ETFB      | 5 | -0.3010719 | 3.90E-08 | 0.00071099 | 0.337 | 0.556 |
| OGFOD3    | 5 | -0.302921  | 1.54E-11 | 2.80E-07   | 0.156 | 0.437 |
| TXNIP     | 5 | -0.3029633 | 1.92E-14 | 3.50E-10   | 0.02  | 0.285 |
| ERGIC3    | 5 | -0.3040898 | 3.04E-09 | 5.55E-05   | 0.712 | 0.877 |
| GPAA1     | 5 | -0.3051309 | 5.11E-10 | 9.33E-06   | 0.161 | 0.412 |
| TP53I13   | 5 | -0.3066942 | 3.14E-12 | 5.72E-08   | 0.117 | 0.398 |
| DSEL      | 5 | -0.306705  | 1.57E-10 | 2.86E-06   | 0.039 | 0.254 |
| CD302     | 5 | -0.3068398 | 1.37E-13 | 2.50E-09   | 0.063 | 0.352 |
| VKORC1    | 5 | -0.3075447 | 1.43E-10 | 2.61E-06   | 0.912 | 0.979 |
| BTF3      | 5 | -0.3078741 | 3.52E-17 | 6.43E-13   | 1     | 1     |
| RPS4Y1    | 5 | -0.3088473 | 1.07E-14 | 1.95E-10   | 0.995 | 0.996 |
| CCDC8     | 5 | -0.3094746 | 2.68E-13 | 4.90E-09   | 0.039 | 0.303 |
| RPL37     | 5 | -0.3095065 | 4.99E-28 | 9.11E-24   | 1     | 1     |
| NAA38     | 5 | -0.3100245 | 3.42E-09 | 6.24E-05   | 0.459 | 0.697 |
| PTPRD-AS1 | 5 | -0.3111683 | 1.60E-09 | 2.92E-05   | 0.205 | 0.458 |
| RPS12     | 5 | -0.3119049 | 3.15E-24 | 5.74E-20   | 1     | 1     |
| GSTA4     | 5 | -0.3139222 | 1.16E-10 | 2.11E-06   | 0.151 | 0.415 |
| TMED10    | 5 | -0.3141012 | 3.21E-10 | 5.86E-06   | 0.854 | 0.915 |
| LDHB      | 5 | -0.3145653 | 5.20E-10 | 9.49E-06   | 0.717 | 0.866 |
| RPS19     | 5 | -0.3147406 | 9.23E-27 | 1.68E-22   | 1     | 1     |
| PRCP      | 5 | -0.3154067 | 8.26E-14 | 1.51E-09   | 0.059 | 0.342 |
| HMG3      | 5 | -0.3160993 | 9.54E-10 | 1.74E-05   | 0.171 | 0.426 |
| S100A4    | 5 | -0.3165293 | 5.02E-09 | 9.15E-05   | 0.585 | 0.806 |
| RPS9      | 5 | -0.3186044 | 1.82E-34 | 3.33E-30   | 1     | 1     |
| TNFRSF1A  | 5 | -0.3196002 | 1.94E-09 | 3.54E-05   | 0.22  | 0.475 |
| MIR99AHG  | 5 | -0.3204454 | 2.87E-12 | 5.23E-08   | 0.068 | 0.327 |
| 01-Sep    | 5 | -0.3227312 | 2.95E-11 | 5.39E-07   | 0.098 | 0.359 |
| TMEM219   | 5 | -0.322791  | 2.94E-09 | 5.36E-05   | 0.483 | 0.697 |
| CYBRD1    | 5 | -0.3228625 | 4.81E-08 | 0.00087712 | 0.449 | 0.644 |
| EIF3K     | 5 | -0.3247769 | 1.25E-11 | 2.29E-07   | 0.79  | 0.898 |
| TMEM230   | 5 | -0.3249406 | 2.60E-10 | 4.74E-06   | 0.566 | 0.778 |
| NMRK1     | 5 | -0.3253358 | 8.48E-11 | 1.55E-06   | 0.161 | 0.43  |
| UQCRH     | 5 | -0.3259262 | 9.26E-15 | 1.69E-10   | 0.932 | 0.986 |

|               |   |            |          |            |       |       |
|---------------|---|------------|----------|------------|-------|-------|
| TSPAN4        | 5 | -0.3264333 | 2.39E-09 | 4.35E-05   | 0.288 | 0.542 |
| RPS25         | 5 | -0.3269414 | 3.12E-36 | 5.70E-32   | 1     | 1     |
| FKBP10        | 5 | -0.3271047 | 5.54E-09 | 0.00010117 | 0.293 | 0.525 |
| MYLK          | 5 | -0.3272663 | 5.93E-11 | 1.08E-06   | 0.088 | 0.342 |
| RPL37A        | 5 | -0.3281878 | 4.18E-36 | 7.63E-32   | 1     | 1     |
| RPL7A         | 5 | -0.3283209 | 3.51E-27 | 6.41E-23   | 1     | 1     |
| H1FX          | 5 | -0.3290189 | 1.25E-11 | 2.28E-07   | 0.088 | 0.352 |
| ENAH          | 5 | -0.3306492 | 8.68E-15 | 1.58E-10   | 0.088 | 0.398 |
| RPL14         | 5 | -0.3312816 | 2.11E-32 | 3.85E-28   | 1     | 1     |
| DMKN          | 5 | -0.3313938 | 1.41E-09 | 2.58E-05   | 0.195 | 0.444 |
| RP5-1097P24.1 | 5 | -0.3343931 | 1.42E-15 | 2.59E-11   | 0.039 | 0.345 |
| RABAC1        | 5 | -0.3354917 | 2.88E-12 | 5.25E-08   | 0.746 | 0.894 |
| EIF2S3        | 5 | -0.3357966 | 3.98E-08 | 0.00072593 | 0.434 | 0.641 |
| MTDH          | 5 | -0.3360362 | 5.62E-10 | 1.03E-05   | 0.502 | 0.718 |
| POLR2L        | 5 | -0.3368201 | 2.00E-08 | 0.00036464 | 0.722 | 0.863 |
| KDELR2        | 5 | -0.3372278 | 1.71E-11 | 3.12E-07   | 0.771 | 0.933 |
| FAM200B       | 5 | -0.3375825 | 6.55E-12 | 1.20E-07   | 0.151 | 0.433 |
| TMEM98        | 5 | -0.3376017 | 1.12E-12 | 2.05E-08   | 0.083 | 0.356 |
| RPL29         | 5 | -0.3381607 | 4.55E-29 | 8.30E-25   | 1     | 1     |
| RPS4X         | 5 | -0.341086  | 5.31E-35 | 9.69E-31   | 1     | 1     |
| AC005152.3    | 5 | -0.3411459 | 4.08E-12 | 7.45E-08   | 0.039 | 0.282 |
| TSPAN3        | 5 | -0.3412074 | 7.34E-09 | 0.000134   | 0.366 | 0.581 |
| FAM46A        | 5 | -0.3417937 | 1.63E-08 | 0.00029823 | 0.376 | 0.634 |
| PNRC1         | 5 | -0.3435024 | 7.82E-14 | 1.43E-09   | 0.927 | 0.996 |
| HSPB1         | 5 | -0.3437027 | 6.13E-11 | 1.12E-06   | 0.576 | 0.82  |
| RP11-983P16.4 | 5 | -0.3453783 | 1.71E-11 | 3.11E-07   | 0.195 | 0.482 |
| RPS29         | 5 | -0.3460422 | 2.06E-32 | 3.75E-28   | 1     | 1     |
| RPS3          | 5 | -0.3471793 | 2.26E-36 | 4.13E-32   | 1     | 1     |
| RPL5          | 5 | -0.3508602 | 2.79E-32 | 5.10E-28   | 1     | 1     |
| ABHD14A       | 5 | -0.3512916 | 2.01E-15 | 3.66E-11   | 0.068 | 0.384 |
| RPL11         | 5 | -0.3521252 | 2.05E-41 | 3.74E-37   | 1     | 1     |
| TCEAL8        | 5 | -0.3528629 | 2.49E-11 | 4.55E-07   | 0.62  | 0.803 |
| PNISR         | 5 | -0.3554564 | 1.48E-10 | 2.70E-06   | 0.502 | 0.722 |
| RNASET2       | 5 | -0.3568416 | 2.63E-12 | 4.80E-08   | 0.156 | 0.444 |
| PGAM1         | 5 | -0.3573306 | 1.99E-12 | 3.64E-08   | 0.624 | 0.866 |
| PLD3          | 5 | -0.3578225 | 3.80E-11 | 6.93E-07   | 0.395 | 0.655 |
| ST13          | 5 | -0.3581603 | 2.12E-16 | 3.86E-12   | 0.966 | 0.975 |
| C7orf73       | 5 | -0.3607795 | 2.95E-11 | 5.38E-07   | 0.6   | 0.835 |
| SH3BGRL       | 5 | -0.3620503 | 2.43E-11 | 4.44E-07   | 0.322 | 0.606 |

|              |   |            |          |            |       |       |
|--------------|---|------------|----------|------------|-------|-------|
| C19orf43     | 5 | -0.3621904 | 1.91E-13 | 3.49E-09   | 0.702 | 0.912 |
| ASPN         | 5 | -0.362477  | 5.47E-07 | 0.00997816 | 0.024 | 0.165 |
| ATRAID       | 5 | -0.3627404 | 1.18E-12 | 2.14E-08   | 0.737 | 0.915 |
| COMMD6       | 5 | -0.3636748 | 6.48E-20 | 1.18E-15   | 0.995 | 1     |
| RPL6         | 5 | -0.363832  | 4.10E-31 | 7.49E-27   | 1     | 1     |
| ITM2B        | 5 | -0.3664074 | 1.56E-14 | 2.86E-10   | 0.971 | 1     |
| HERPUD1      | 5 | -0.3671829 | 8.24E-11 | 1.50E-06   | 0.278 | 0.546 |
| AC003090.1   | 5 | -0.3695058 | 2.74E-17 | 4.99E-13   | 0.034 | 0.359 |
| CMB9-22P13.1 | 5 | -0.3708527 | 1.11E-11 | 2.02E-07   | 0.263 | 0.542 |
| SLC44A1      | 5 | -0.3715213 | 2.46E-14 | 4.50E-10   | 0.107 | 0.419 |
| RPLP1        | 5 | -0.3719098 | 4.92E-42 | 8.98E-38   | 1     | 1     |
| PLPP1        | 5 | -0.373917  | 1.08E-10 | 1.96E-06   | 0.083 | 0.32  |
| RPS18        | 5 | -0.3747336 | 3.63E-38 | 6.62E-34   | 1     | 1     |
| NUCB2        | 5 | -0.3788206 | 1.39E-09 | 2.54E-05   | 0.307 | 0.553 |
| GNAS         | 5 | -0.3798147 | 5.05E-12 | 9.21E-08   | 0.498 | 0.715 |
| CRIP2        | 5 | -0.3817817 | 8.71E-11 | 1.59E-06   | 0.254 | 0.518 |
| RPS7         | 5 | -0.3821086 | 2.37E-31 | 4.33E-27   | 1     | 1     |
| EFNA1        | 5 | -0.3829313 | 3.42E-12 | 6.24E-08   | 0.171 | 0.468 |
| COL5A2       | 5 | -0.3829313 | 1.55E-11 | 2.83E-07   | 0.151 | 0.43  |
| ARHGAP29     | 5 | -0.3831195 | 1.63E-11 | 2.98E-07   | 0.151 | 0.433 |
| RPL22        | 5 | -0.3834098 | 9.55E-33 | 1.74E-28   | 1     | 1     |
| BHLHE41      | 5 | -0.3842774 | 2.32E-12 | 4.23E-08   | 0.102 | 0.38  |
| BRK1         | 5 | -0.3847787 | 4.33E-16 | 7.89E-12   | 0.722 | 0.905 |
| ANGPTL5      | 5 | -0.3875226 | 1.53E-18 | 2.79E-14   | 0.059 | 0.415 |
| GLTSCR2      | 5 | -0.3885665 | 1.73E-16 | 3.15E-12   | 0.834 | 0.961 |
| ATRNL1       | 5 | -0.3893568 | 1.06E-16 | 1.93E-12   | 0.078 | 0.412 |
| HDLBP        | 5 | -0.3896558 | 2.69E-11 | 4.91E-07   | 0.283 | 0.553 |
| ZBTB20       | 5 | -0.3907134 | 3.78E-16 | 6.89E-12   | 0.102 | 0.444 |
| VCAN         | 5 | -0.3912805 | 8.60E-09 | 0.00015695 | 0.268 | 0.496 |
| CTSK         | 5 | -0.3913334 | 1.38E-17 | 2.52E-13   | 0.073 | 0.426 |
| CCNG1        | 5 | -0.3930687 | 9.99E-13 | 1.82E-08   | 0.307 | 0.599 |
| RPL15        | 5 | -0.3931861 | 2.31E-50 | 4.21E-46   | 1     | 1     |
| RPS2         | 5 | -0.393987  | 7.84E-43 | 1.43E-38   | 1     | 1     |
| TCEA3        | 5 | -0.3941276 | 4.81E-13 | 8.77E-09   | 0.146 | 0.437 |
| RPS5         | 5 | -0.3964929 | 1.42E-36 | 2.58E-32   | 1     | 1     |
| CPE          | 5 | -0.3996182 | 3.23E-11 | 5.90E-07   | 0.605 | 0.789 |
| RPL13        | 5 | -0.4001116 | 6.56E-52 | 1.20E-47   | 1     | 1     |
| CALR         | 5 | -0.4003478 | 2.97E-09 | 5.43E-05   | 0.546 | 0.732 |
| NDUFA11      | 5 | -0.4004639 | 5.51E-15 | 1.00E-10   | 0.8   | 0.951 |

|          |   |            |          |          |       |       |
|----------|---|------------|----------|----------|-------|-------|
| TPD52L1  | 5 | -0.4049232 | 5.61E-10 | 1.02E-05 | 0.283 | 0.539 |
| ILF3-AS1 | 5 | -0.4100029 | 1.21E-16 | 2.21E-12 | 0.141 | 0.496 |
| HLA-C    | 5 | -0.4119923 | 1.31E-12 | 2.39E-08 | 0.888 | 0.965 |
| RCN2     | 5 | -0.4133958 | 1.91E-13 | 3.48E-09 | 0.459 | 0.715 |
| RPL3     | 5 | -0.4137119 | 1.16E-38 | 2.11E-34 | 1     | 1     |
| SRSF5    | 5 | -0.4161095 | 1.76E-11 | 3.22E-07 | 0.449 | 0.683 |
| PCBP2    | 5 | -0.4182381 | 1.45E-18 | 2.64E-14 | 0.824 | 0.958 |
| ENPP1    | 5 | -0.4193687 | 4.76E-17 | 8.69E-13 | 0.078 | 0.419 |
| RPSA     | 5 | -0.4195375 | 2.27E-30 | 4.15E-26 | 1     | 1     |
| DBP      | 5 | -0.4198822 | 1.45E-15 | 2.65E-11 | 0.107 | 0.433 |
| RPL13A   | 5 | -0.420591  | 1.08E-53 | 1.97E-49 | 1     | 1     |
| MYL6     | 5 | -0.4216428 | 3.53E-18 | 6.44E-14 | 0.863 | 0.972 |
| SSR2     | 5 | -0.4220722 | 7.02E-16 | 1.28E-11 | 0.815 | 0.93  |
| PTRF     | 5 | -0.4222427 | 3.65E-14 | 6.66E-10 | 0.239 | 0.553 |
| COL9A2   | 5 | -0.4224456 | 3.76E-12 | 6.86E-08 | 0.195 | 0.489 |
| SPON2    | 5 | -0.4231115 | 1.52E-13 | 2.78E-09 | 0.078 | 0.363 |
| PIK3R1   | 5 | -0.4251056 | 6.74E-12 | 1.23E-07 | 0.059 | 0.306 |
| ARL6IP5  | 5 | -0.4252782 | 8.37E-14 | 1.53E-09 | 0.385 | 0.683 |
| MFGE8    | 5 | -0.4278859 | 1.17E-10 | 2.13E-06 | 0.824 | 0.947 |
| PIM3     | 5 | -0.4287651 | 3.79E-11 | 6.91E-07 | 0.322 | 0.588 |
| TUBB     | 5 | -0.4292913 | 6.28E-14 | 1.15E-09 | 0.698 | 0.898 |
| RPL10    | 5 | -0.4314032 | 4.67E-55 | 8.52E-51 | 1     | 1     |
| TOMM7    | 5 | -0.4315069 | 1.28E-41 | 2.33E-37 | 1     | 1     |
| RPS27A   | 5 | -0.43199   | 4.03E-51 | 7.35E-47 | 1     | 1     |
| GRN      | 5 | -0.4335974 | 1.76E-17 | 3.20E-13 | 0.098 | 0.458 |
| SPINT2   | 5 | -0.434976  | 2.31E-11 | 4.21E-07 | 0.268 | 0.539 |
| RPL8     | 5 | -0.4353674 | 4.19E-48 | 7.64E-44 | 1     | 1     |
| FOS      | 5 | -0.4385399 | 5.69E-12 | 1.04E-07 | 0.317 | 0.623 |
| PPIA     | 5 | -0.4387494 | 3.41E-19 | 6.21E-15 | 0.888 | 0.982 |
| BAMBI    | 5 | -0.4406854 | 6.09E-10 | 1.11E-05 | 0.312 | 0.574 |
| RPS6     | 5 | -0.4407955 | 8.30E-53 | 1.51E-48 | 1     | 1     |
| PRELP    | 5 | -0.4417649 | 3.12E-13 | 5.69E-09 | 0.917 | 0.979 |
| CXXC5    | 5 | -0.443059  | 2.66E-16 | 4.86E-12 | 0.068 | 0.391 |
| EEF1B2   | 5 | -0.4438472 | 1.00E-22 | 1.83E-18 | 0.985 | 1     |
| SEC11A   | 5 | -0.4447412 | 8.99E-20 | 1.64E-15 | 0.766 | 0.954 |
| PDE4DIP  | 5 | -0.4455148 | 1.01E-13 | 1.85E-09 | 0.259 | 0.56  |
| CTGF     | 5 | -0.4472256 | 7.83E-12 | 1.43E-07 | 0.127 | 0.419 |
| RPS23    | 5 | -0.4477147 | 1.21E-45 | 2.22E-41 | 1     | 1     |
| FCGRT    | 5 | -0.4496895 | 1.05E-12 | 1.92E-08 | 0.454 | 0.669 |

|          |   |            |          |          |       |       |
|----------|---|------------|----------|----------|-------|-------|
| MAGED1   | 5 | -0.4534041 | 3.76E-15 | 6.87E-11 | 0.024 | 0.306 |
| RNF130   | 5 | -0.4552902 | 6.97E-15 | 1.27E-10 | 0.356 | 0.655 |
| RPS13    | 5 | -0.4570191 | 6.26E-46 | 1.14E-41 | 1     | 1     |
| RPN2     | 5 | -0.4571794 | 1.39E-19 | 2.53E-15 | 0.063 | 0.44  |
| RPL19    | 5 | -0.4575742 | 4.78E-55 | 8.73E-51 | 1     | 1     |
| CUTA     | 5 | -0.4584743 | 4.58E-16 | 8.35E-12 | 0.702 | 0.859 |
| RPL23    | 5 | -0.4598066 | 1.12E-32 | 2.04E-28 | 0.995 | 1     |
| MIA      | 5 | -0.4619872 | 3.62E-15 | 6.60E-11 | 0.961 | 0.996 |
| RPL34    | 5 | -0.4628553 | 3.46E-50 | 6.31E-46 | 1     | 1     |
| PPP1R3C  | 5 | -0.4638098 | 1.92E-12 | 3.50E-08 | 0.263 | 0.539 |
| GSN      | 5 | -0.4644613 | 5.92E-14 | 1.08E-09 | 0.376 | 0.676 |
| SEPP1    | 5 | -0.4645571 | 1.25E-17 | 2.28E-13 | 0.205 | 0.592 |
| PTMS     | 5 | -0.4652031 | 4.27E-18 | 7.79E-14 | 0.395 | 0.764 |
| PPIC     | 5 | -0.4652651 | 2.97E-13 | 5.41E-09 | 0.234 | 0.518 |
| RPL9     | 5 | -0.4670324 | 5.11E-50 | 9.33E-46 | 1     | 1     |
| HTRA1    | 5 | -0.4671719 | 9.99E-18 | 1.82E-13 | 0.551 | 0.891 |
| PSAP     | 5 | -0.4681088 | 7.90E-20 | 1.44E-15 | 0.844 | 0.972 |
| DNM3OS   | 5 | -0.4683681 | 1.16E-19 | 2.11E-15 | 0.044 | 0.405 |
| MKX      | 5 | -0.4691041 | 1.42E-20 | 2.59E-16 | 0.093 | 0.496 |
| ATPIF1   | 5 | -0.4707462 | 5.33E-18 | 9.73E-14 | 0.444 | 0.764 |
| PRUNE2   | 5 | -0.4719408 | 7.40E-16 | 1.35E-11 | 0.161 | 0.511 |
| HEXB     | 5 | -0.4728812 | 5.58E-15 | 1.02E-10 | 0.307 | 0.627 |
| PPT1     | 5 | -0.4729566 | 7.24E-19 | 1.32E-14 | 0.146 | 0.525 |
| AP2M1    | 5 | -0.4735633 | 5.45E-19 | 9.95E-15 | 0.317 | 0.687 |
| DCN      | 5 | -0.4747403 | 1.32E-25 | 2.41E-21 | 1     | 0.996 |
| LRPAP1   | 5 | -0.4754356 | 1.20E-14 | 2.18E-10 | 0.41  | 0.711 |
| RPLP2    | 5 | -0.4759606 | 1.32E-50 | 2.40E-46 | 1     | 1     |
| RPS17    | 5 | -0.4762367 | 4.34E-43 | 7.91E-39 | 1     | 1     |
| HMG2N2   | 5 | -0.4815716 | 2.98E-19 | 5.43E-15 | 0.795 | 0.965 |
| YBX3     | 5 | -0.4828381 | 3.96E-19 | 7.23E-15 | 0.717 | 0.933 |
| CTSD     | 5 | -0.4842036 | 2.69E-14 | 4.92E-10 | 0.776 | 0.944 |
| RPL30    | 5 | -0.4846686 | 3.45E-45 | 6.30E-41 | 1     | 1     |
| DUSP1    | 5 | -0.4867978 | 3.14E-13 | 5.73E-09 | 0.283 | 0.585 |
| PKM      | 5 | -0.4899077 | 3.61E-18 | 6.59E-14 | 0.815 | 0.951 |
| SERPINA5 | 5 | -0.4901724 | 1.69E-12 | 3.08E-08 | 0.332 | 0.602 |
| CYR61    | 5 | -0.490243  | 4.12E-10 | 7.51E-06 | 0.112 | 0.356 |
| FTL      | 5 | -0.4912289 | 8.71E-38 | 1.59E-33 | 1     | 1     |
| HLA-A    | 5 | -0.4968351 | 2.08E-17 | 3.80E-13 | 0.839 | 0.982 |
| NFIA     | 5 | -0.5001586 | 5.87E-22 | 1.07E-17 | 0.098 | 0.5   |

|          |   |            |          |           |       |       |
|----------|---|------------|----------|-----------|-------|-------|
| DDR2     | 5 | -0.5029845 | 3.44E-16 | 6.27E-12  | 0.244 | 0.592 |
| EID1     | 5 | -0.5056838 | 3.49E-26 | 6.37E-22  | 0.834 | 0.993 |
| RPL23A   | 5 | -0.5089438 | 2.27E-54 | 4.14E-50  | 1     | 1     |
| NAP1L1   | 5 | -0.5152248 | 1.19E-28 | 2.16E-24  | 0.927 | 0.986 |
| RPS16    | 5 | -0.5161266 | 1.12E-54 | 2.04E-50  | 1     | 1     |
| TTC3     | 5 | -0.5176639 | 2.93E-16 | 5.34E-12  | 0.42  | 0.725 |
| EIF4B    | 5 | -0.5253384 | 1.67E-20 | 3.05E-16  | 0.702 | 0.93  |
| RPS3A    | 5 | -0.5263663 | 1.42E-58 | 2.59E-54  | 1     | 1     |
| TSPO     | 5 | -0.5297529 | 2.01E-22 | 3.67E-18  | 0.663 | 0.908 |
| TCF4     | 5 | -0.5313525 | 1.73E-21 | 3.15E-17  | 0.098 | 0.496 |
| CST3     | 5 | -0.5319909 | 1.41E-22 | 2.58E-18  | 0.985 | 1     |
| SDC2     | 5 | -0.5325419 | 3.32E-20 | 6.05E-16  | 0.683 | 0.933 |
| PRDX4    | 5 | -0.539263  | 5.62E-21 | 1.03E-16  | 0.595 | 0.894 |
| CHID1    | 5 | -0.5419246 | 2.00E-23 | 3.64E-19  | 0.346 | 0.764 |
| RPL7     | 5 | -0.54304   | 9.68E-47 | 1.77E-42  | 1     | 1     |
| MDFI     | 5 | -0.5441136 | 9.39E-19 | 1.71E-14  | 0.239 | 0.616 |
| SSPN     | 5 | -0.5472083 | 3.25E-25 | 5.94E-21  | 0.044 | 0.486 |
| CCDC102B | 5 | -0.5474699 | 9.79E-27 | 1.79E-22  | 0     | 0.43  |
| SOD3     | 5 | -0.5475278 | 5.96E-13 | 1.09E-08  | 0.912 | 0.965 |
| RPL18    | 5 | -0.5477756 | 2.18E-55 | 3.98E-51  | 1     | 1     |
| FMOD     | 5 | -0.5515267 | 6.65E-25 | 1.21E-20  | 0.873 | 0.965 |
| PLXDC2   | 5 | -0.5559938 | 4.16E-22 | 7.59E-18  | 0.346 | 0.739 |
| APOD     | 5 | -0.5560694 | 4.94E-11 | 9.02E-07  | 0.244 | 0.511 |
| JUNB     | 5 | -0.5592359 | 2.19E-16 | 4.00E-12  | 0.405 | 0.746 |
| SLC14A1  | 5 | -0.5687846 | 7.64E-21 | 1.39E-16  | 0.166 | 0.563 |
| ACTG1    | 5 | -0.5755842 | 2.20E-24 | 4.01E-20  | 0.937 | 0.982 |
| MT-CO3   | 5 | -0.5783249 | 2.34E-06 | 0.0427071 | 0.8   | 0.778 |
| BSG      | 5 | -0.5801958 | 2.23E-26 | 4.07E-22  | 0.502 | 0.863 |
| PDIA3    | 5 | -0.5820383 | 1.72E-19 | 3.15E-15  | 0.376 | 0.725 |
| XAGE2    | 5 | -0.5874237 | 2.80E-10 | 5.10E-06  | 0.005 | 0.187 |
| MALAT1   | 5 | -0.589497  | 5.06E-23 | 9.24E-19  | 1     | 1     |
| SLC40A1  | 5 | -0.5903265 | 2.86E-24 | 5.21E-20  | 0.034 | 0.454 |
| CCNI     | 5 | -0.6047323 | 7.32E-37 | 1.34E-32  | 1     | 1     |
| COL11A1  | 5 | -0.6104001 | 1.59E-22 | 2.90E-18  | 0.556 | 0.866 |
| SDF4     | 5 | -0.6225502 | 2.06E-24 | 3.76E-20  | 0.454 | 0.799 |
| HIST1H4C | 5 | -0.6247632 | 2.20E-21 | 4.02E-17  | 0.224 | 0.63  |
| TPT1     | 5 | -0.6278653 | 5.71E-57 | 1.04E-52  | 1     | 1     |
| H3F3A    | 5 | -0.6339503 | 6.47E-38 | 1.18E-33  | 0.893 | 1     |
| RPLP0    | 5 | -0.6359304 | 1.65E-58 | 3.01E-54  | 1     | 1     |

|         |   |            |          |            |       |       |
|---------|---|------------|----------|------------|-------|-------|
| VIM     | 5 | -0.6389763 | 1.64E-35 | 3.00E-31   | 1     | 1     |
| ITM2A   | 5 | -0.6439699 | 3.94E-22 | 7.18E-18   | 0.327 | 0.729 |
| MT-ND1  | 5 | -0.6495879 | 3.02E-18 | 5.51E-14   | 0.185 | 0.574 |
| FXVD6   | 5 | -0.6518338 | 1.86E-30 | 3.39E-26   | 0.576 | 0.912 |
| MT-CYB  | 5 | -0.6520834 | 6.35E-12 | 1.16E-07   | 0.483 | 0.683 |
| GPX3    | 5 | -0.6544743 | 4.57E-25 | 8.33E-21   | 0.844 | 0.986 |
| ID4     | 5 | -0.6563476 | 1.75E-22 | 3.19E-18   | 0.293 | 0.708 |
| RBP4    | 5 | -0.6633845 | 8.41E-22 | 1.54E-17   | 0.585 | 0.905 |
| CTSC    | 5 | -0.6637169 | 6.13E-14 | 1.12E-09   | 0.137 | 0.437 |
| EIF3L   | 5 | -0.6663124 | 1.56E-35 | 2.85E-31   | 0.761 | 0.972 |
| MT-ND3  | 5 | -0.6666068 | 1.09E-13 | 1.99E-09   | 0.376 | 0.637 |
| PABPC1  | 5 | -0.6667525 | 7.67E-34 | 1.40E-29   | 0.722 | 0.961 |
| PEBP1   | 5 | -0.6670344 | 3.24E-32 | 5.92E-28   | 0.6   | 0.923 |
| RPL10A  | 5 | -0.6673183 | 1.52E-58 | 2.77E-54   | 1     | 1     |
| INHBA   | 5 | -0.6681102 | 9.69E-25 | 1.77E-20   | 0.073 | 0.511 |
| MT-ATP6 | 5 | -0.6692349 | 3.04E-08 | 0.00055386 | 0.644 | 0.718 |
| RPS8    | 5 | -0.6712991 | 1.31E-65 | 2.40E-61   | 1     | 1     |
| CRTAP   | 5 | -0.6895814 | 5.29E-33 | 9.65E-29   | 0.517 | 0.88  |
| SSR3    | 5 | -0.6923373 | 1.60E-33 | 2.93E-29   | 0.81  | 0.982 |
| NPC2    | 5 | -0.6929965 | 2.06E-46 | 3.77E-42   | 0.966 | 1     |
| RPS20   | 5 | -0.6930997 | 1.32E-58 | 2.41E-54   | 1     | 1     |
| RPS11   | 5 | -0.6970069 | 6.23E-55 | 1.14E-50   | 0.985 | 1     |
| NNMT    | 5 | -0.7079383 | 6.69E-26 | 1.22E-21   | 0.805 | 0.972 |
| GAS6    | 5 | -0.7084861 | 8.50E-31 | 1.55E-26   | 0.127 | 0.637 |
| FTH1    | 5 | -0.7114272 | 6.94E-47 | 1.27E-42   | 1     | 1     |
| ITM2C   | 5 | -0.7168256 | 2.92E-26 | 5.33E-22   | 0.229 | 0.669 |
| MGP     | 5 | -0.7239868 | 1.34E-23 | 2.45E-19   | 0.995 | 1     |
| CFH     | 5 | -0.7305365 | 7.10E-15 | 1.29E-10   | 0.156 | 0.489 |
| CEBPD   | 5 | -0.7324729 | 4.09E-26 | 7.46E-22   | 0.668 | 0.93  |
| CP      | 5 | -0.7364002 | 7.96E-26 | 1.45E-21   | 0.556 | 0.852 |
| NGFRAP1 | 5 | -0.7369299 | 4.10E-40 | 7.47E-36   | 0.659 | 0.972 |
| HNRNPA1 | 5 | -0.7434003 | 5.38E-45 | 9.83E-41   | 0.976 | 1     |
| ZFP36L2 | 5 | -0.7510089 | 9.62E-22 | 1.75E-17   | 0.063 | 0.451 |
| MT-CO2  | 5 | -0.7533633 | 1.17E-08 | 0.00021417 | 0.859 | 0.838 |
| CITED2  | 5 | -0.7618759 | 2.41E-27 | 4.40E-23   | 0.21  | 0.694 |
| RPL4    | 5 | -0.7646504 | 6.18E-62 | 1.13E-57   | 0.995 | 1     |
| CD9     | 5 | -0.7649683 | 3.82E-28 | 6.97E-24   | 0.327 | 0.764 |
| MT-ND2  | 5 | -0.772648  | 8.08E-16 | 1.47E-11   | 0.307 | 0.627 |
| ISLR    | 5 | -0.7970921 | 1.12E-33 | 2.04E-29   | 0.083 | 0.623 |



|          |         |            |          |           |       |       |
|----------|---------|------------|----------|-----------|-------|-------|
| SNAI2    | 5       | -0.8045918 | 6.53E-28 | 1.19E-23  | 0.18  | 0.669 |
| LECT1    | 5       | -0.807707  | 3.08E-24 | 5.62E-20  | 0.722 | 0.951 |
| PDIA6    | 5       | -0.8090157 | 6.02E-38 | 1.10E-33  | 0.42  | 0.884 |
| ID2      | 5       | -0.8095915 | 1.57E-20 | 2.86E-16  | 0.293 | 0.669 |
| SPARC    | 5       | -0.8315831 | 3.72E-32 | 6.78E-28  | 0.288 | 0.785 |
| EIF3H    | 5       | -0.8320643 | 7.36E-56 | 1.34E-51  | 0.961 | 0.996 |
| S100B    | 5       | -0.8366854 | 6.67E-38 | 1.22E-33  | 0.663 | 0.951 |
| C2orf82  | 5       | -0.8420913 | 2.44E-36 | 4.46E-32  | 0.976 | 1     |
| EEF2     | 5       | -0.8777646 | 2.07E-47 | 3.77E-43  | 0.985 | 1     |
| CD99     | 5       | -0.8787647 | 5.13E-48 | 9.36E-44  | 0.81  | 0.989 |
| ACAN     | 5       | -0.8804383 | 1.03E-45 | 1.89E-41  | 0.917 | 0.993 |
| FBXO2    | 5       | -0.8804645 | 3.24E-44 | 5.91E-40  | 0.478 | 0.919 |
| RHOBTB3  | 5       | -0.9253643 | 4.39E-42 | 8.01E-38  | 0.278 | 0.856 |
| NEAT1    | 5       | -0.9324608 | 2.86E-47 | 5.22E-43  | 0.985 | 1     |
| TSC22D1  | 5       | -0.9440376 | 1.36E-27 | 2.49E-23  | 0.532 | 0.877 |
| EEF1A1   | 5       | -0.9496478 | 1.04E-73 | 1.90E-69  | 1     | 1     |
| GREM1    | 5       | -1.0223586 | 4.60E-28 | 8.39E-24  | 0.01  | 0.465 |
| B2M      | 5       | -1.0365504 | 2.06E-60 | 3.76E-56  | 0.976 | 1     |
| COL2A1   | 5       | -1.0391091 | 3.72E-45 | 6.79E-41  | 0.317 | 0.901 |
| P4HB     | 5       | -1.0465292 | 2.56E-49 | 4.68E-45  | 0.605 | 0.975 |
| PAX1     | 5       | -1.0492277 | 1.52E-49 | 2.77E-45  | 0.366 | 0.901 |
| CHRD12   | 5       | -1.0593174 | 6.80E-31 | 1.24E-26  | 0.151 | 0.655 |
| ADIRF    | 5       | -1.0753092 | 3.46E-32 | 6.31E-28  | 0.337 | 0.817 |
| CRISPLD1 | 5       | -1.1009625 | 1.04E-42 | 1.89E-38  | 0.024 | 0.651 |
| COL9A3   | 5       | -1.1264335 | 4.43E-34 | 8.08E-30  | 0.488 | 0.884 |
| CAPS     | 5       | -1.1620519 | 2.32E-41 | 4.23E-37  | 0.61  | 0.958 |
| SLPI     | 5       | -1.1949452 | 3.85E-22 | 7.03E-18  | 0.976 | 1     |
| PLAC9    | 5       | -1.2044109 | 2.02E-52 | 3.69E-48  | 0.488 | 0.954 |
| ID1      | 5       | -1.3071634 | 4.47E-36 | 8.15E-32  | 0.22  | 0.757 |
| ID3      | 5       | -1.3939822 | 1.84E-47 | 3.35E-43  | 0.146 | 0.817 |
| OGN      | 5       | -1.4089503 | 6.10E-48 | 1.11E-43  | 0.722 | 0.975 |
| CLEC3A   | 5       | -1.9489993 | 1.70E-65 | 3.10E-61  | 0.215 | 0.947 |
| FRZB     | 5       | -1.9857645 | 7.34E-65 | 1.34E-60  | 0.629 | 0.993 |
| SPTSSB   | 5       | -2.0222614 | 7.11E-69 | 1.30E-64  | 0.024 | 0.884 |
| gene     | cluster | avg_logFC  | p_val    | p_val_adj | pct.1 | pct.2 |
| SPP1     | 6       | 2.54369566 | 5.05E-40 | 9.22E-36  | 0.827 | 0.162 |
| MT2A     | 6       | 2.07931677 | 3.58E-63 | 6.54E-59  | 1     | 0.994 |
| PRG4     | 6       | 1.76716136 | 7.62E-33 | 1.39E-28  | 0.632 | 0.06  |
| CTSL     | 6       | 1.50849939 | 5.95E-38 | 1.09E-33  | 0.906 | 0.527 |

|           |   |            |          |            |       |       |
|-----------|---|------------|----------|------------|-------|-------|
| UPP1      | 6 | 1.43079229 | 7.34E-53 | 1.34E-48   | 0.858 | 0.132 |
| IL11      | 6 | 1.4018953  | 3.49E-22 | 6.36E-18   | 0.421 | 0     |
| IGFBP3    | 6 | 1.37822556 | 4.21E-30 | 7.68E-26   | 0.723 | 0.18  |
| PTGS2     | 6 | 1.26029874 | 1.79E-40 | 3.26E-36   | 0.714 | 0.06  |
| CXCL8     | 6 | 1.24623442 | 2.26E-07 | 0.00413108 | 0.17  | 0.012 |
| MRPS6     | 6 | 1.24195197 | 1.20E-42 | 2.20E-38   | 0.987 | 0.91  |
| S100A2    | 6 | 1.22139207 | 1.73E-21 | 3.15E-17   | 0.808 | 0.437 |
| COMP      | 6 | 1.19568839 | 2.14E-22 | 3.91E-18   | 0.937 | 0.713 |
| MT1X      | 6 | 1.1922278  | 4.89E-28 | 8.93E-24   | 1     | 0.976 |
| SOD2      | 6 | 1.19129115 | 6.13E-33 | 1.12E-28   | 0.994 | 0.79  |
| BMP2      | 6 | 1.17314856 | 2.20E-37 | 4.02E-33   | 0.717 | 0.09  |
| STK17A    | 6 | 1.14842944 | 2.26E-42 | 4.13E-38   | 0.846 | 0.24  |
| TGFBI     | 6 | 1.14544711 | 8.98E-23 | 1.64E-18   | 0.648 | 0.228 |
| VEGFA     | 6 | 1.13484374 | 3.04E-41 | 5.54E-37   | 0.909 | 0.401 |
| C11orf96  | 6 | 1.09415686 | 1.41E-35 | 2.57E-31   | 0.676 | 0.072 |
| TM4SF1    | 6 | 1.07359393 | 4.56E-30 | 8.32E-26   | 0.915 | 0.593 |
| SMOX      | 6 | 1.04098752 | 2.46E-28 | 4.49E-24   | 0.701 | 0.198 |
| HMGA1     | 6 | 1.03386026 | 4.16E-33 | 7.59E-29   | 0.89  | 0.437 |
| CD55      | 6 | 1.02492856 | 1.61E-36 | 2.94E-32   | 0.925 | 0.497 |
| PHLDA1    | 6 | 0.96349177 | 1.11E-24 | 2.02E-20   | 0.579 | 0.096 |
| TNFRSF12A | 6 | 0.95851472 | 5.40E-38 | 9.85E-34   | 0.94  | 0.467 |
| CTHRC1    | 6 | 0.93967199 | 6.51E-25 | 1.19E-20   | 0.604 | 0.126 |
| PMP22     | 6 | 0.8800645  | 4.78E-33 | 8.73E-29   | 0.94  | 0.647 |
| SERPINE1  | 6 | 0.86313025 | 9.73E-17 | 1.77E-12   | 0.56  | 0.186 |
| BAALC     | 6 | 0.8446037  | 2.57E-23 | 4.69E-19   | 0.774 | 0.377 |
| SLC25A37  | 6 | 0.83850094 | 2.45E-32 | 4.47E-28   | 0.928 | 0.587 |
| CCDC85B   | 6 | 0.83404434 | 4.00E-23 | 7.30E-19   | 0.918 | 0.713 |
| IER3      | 6 | 0.83208505 | 7.48E-13 | 1.37E-08   | 0.553 | 0.246 |
| WTAP      | 6 | 0.7968952  | 8.25E-27 | 1.50E-22   | 0.865 | 0.455 |
| NRP2      | 6 | 0.78540896 | 3.55E-21 | 6.48E-17   | 0.588 | 0.162 |
| ERO1A     | 6 | 0.77472225 | 1.46E-26 | 2.67E-22   | 0.796 | 0.419 |
| SPRY2     | 6 | 0.76802091 | 1.93E-27 | 3.53E-23   | 0.629 | 0.114 |
| NDRG1     | 6 | 0.7614762  | 8.59E-23 | 1.57E-18   | 0.796 | 0.437 |
| GSTO1     | 6 | 0.75403402 | 2.62E-28 | 4.78E-24   | 0.868 | 0.533 |
| MIF       | 6 | 0.75180624 | 2.43E-48 | 4.44E-44   | 1     | 1     |
| SLC5A3    | 6 | 0.75004323 | 3.61E-20 | 6.59E-16   | 0.792 | 0.455 |
| EIF4A2    | 6 | 0.73938824 | 9.23E-36 | 1.68E-31   | 0.994 | 0.916 |
| SERPINE2  | 6 | 0.71205744 | 1.01E-18 | 1.85E-14   | 1     | 1     |
| BHLHE40   | 6 | 0.70368812 | 1.03E-14 | 1.87E-10   | 0.604 | 0.299 |

|           |   |            |          |            |       |       |
|-----------|---|------------|----------|------------|-------|-------|
| SNHG12    | 6 | 0.68379879 | 2.28E-22 | 4.15E-18   | 0.626 | 0.186 |
| LINC00152 | 6 | 0.66798583 | 3.18E-18 | 5.79E-14   | 0.733 | 0.401 |
| MT1E      | 6 | 0.66060962 | 5.68E-11 | 1.04E-06   | 0.994 | 0.982 |
| BTG1      | 6 | 0.66047084 | 1.06E-27 | 1.94E-23   | 0.987 | 0.844 |
| RABGGTB   | 6 | 0.64472825 | 6.58E-25 | 1.20E-20   | 0.862 | 0.491 |
| PPP1R15A  | 6 | 0.63890365 | 1.68E-20 | 3.06E-16   | 0.626 | 0.204 |
| CCND1     | 6 | 0.63769294 | 4.33E-19 | 7.89E-15   | 0.73  | 0.329 |
| FOSL1     | 6 | 0.63687628 | 4.78E-16 | 8.71E-12   | 0.472 | 0.102 |
| BZW1      | 6 | 0.63059682 | 3.71E-22 | 6.77E-18   | 0.915 | 0.623 |
| ISG20     | 6 | 0.62743643 | 3.22E-19 | 5.88E-15   | 0.752 | 0.407 |
| FN1       | 6 | 0.62611903 | 9.65E-21 | 1.76E-16   | 1     | 0.988 |
| TREM1     | 6 | 0.61963447 | 3.76E-23 | 6.86E-19   | 0.447 | 0.006 |
| PLAUR     | 6 | 0.61357751 | 6.72E-19 | 1.23E-14   | 0.648 | 0.24  |
| HLA-DRB1  | 6 | 0.60587254 | 1.07E-20 | 1.96E-16   | 0.585 | 0.156 |
| EIF1      | 6 | 0.60032156 | 1.07E-32 | 1.95E-28   | 1     | 1     |
| S100A16   | 6 | 0.59899134 | 2.52E-17 | 4.60E-13   | 0.698 | 0.341 |
| GBE1      | 6 | 0.59355359 | 1.89E-13 | 3.44E-09   | 0.723 | 0.461 |
| HMGA2     | 6 | 0.59270506 | 2.87E-27 | 5.23E-23   | 0.525 | 0.024 |
| NRN1      | 6 | 0.58755518 | 2.97E-11 | 5.42E-07   | 0.607 | 0.299 |
| VAPA      | 6 | 0.5809334  | 5.67E-25 | 1.04E-20   | 0.978 | 0.784 |
| ADSS      | 6 | 0.57328007 | 1.56E-16 | 2.85E-12   | 0.726 | 0.443 |
| PPP3CA    | 6 | 0.5706976  | 6.80E-13 | 1.24E-08   | 0.899 | 0.635 |
| SLC2A1    | 6 | 0.56605022 | 9.42E-15 | 1.72E-10   | 0.487 | 0.144 |
| MT1G      | 6 | 0.56507432 | 2.46E-12 | 4.50E-08   | 0.959 | 0.76  |
| ENO2      | 6 | 0.56198777 | 3.54E-18 | 6.46E-14   | 0.692 | 0.323 |
| PPP1CB    | 6 | 0.55696972 | 1.03E-10 | 1.88E-06   | 0.821 | 0.629 |
| CA9       | 6 | 0.55654417 | 1.29E-16 | 2.35E-12   | 0.525 | 0.156 |
| FAM162A   | 6 | 0.54822896 | 4.09E-19 | 7.46E-15   | 0.934 | 0.743 |
| TIMP3     | 6 | 0.54699428 | 1.49E-06 | 0.02726048 | 0.682 | 0.509 |
| SLC20A1   | 6 | 0.54636227 | 1.58E-15 | 2.89E-11   | 0.55  | 0.192 |
| RELB      | 6 | 0.53626827 | 2.34E-18 | 4.27E-14   | 0.484 | 0.096 |
| RNF114    | 6 | 0.53428845 | 1.18E-16 | 2.15E-12   | 0.692 | 0.371 |
| GDF15     | 6 | 0.53242209 | 3.73E-07 | 0.00680914 | 0.223 | 0.048 |
| GJA1      | 6 | 0.52118602 | 1.22E-17 | 2.22E-13   | 0.447 | 0.072 |
| DDIT3     | 6 | 0.51414682 | 1.03E-12 | 1.87E-08   | 0.692 | 0.359 |
| DDIT4L    | 6 | 0.51229306 | 2.84E-16 | 5.17E-12   | 0.824 | 0.467 |
| ZNF593    | 6 | 0.51209567 | 3.14E-20 | 5.72E-16   | 0.739 | 0.365 |
| ANGPTL4   | 6 | 0.50281311 | 5.98E-12 | 1.09E-07   | 0.412 | 0.114 |
| TFPI      | 6 | 0.50083547 | 1.08E-10 | 1.97E-06   | 0.377 | 0.108 |

|               |   |            |          |            |       |       |
|---------------|---|------------|----------|------------|-------|-------|
| CHI3L2        | 6 | 0.48892236 | 8.23E-07 | 0.01501012 | 0.597 | 0.407 |
| TMSB10        | 6 | 0.4886482  | 7.68E-15 | 1.40E-10   | 1     | 0.994 |
| RND3          | 6 | 0.48501393 | 4.42E-12 | 8.07E-08   | 0.374 | 0.084 |
| FABP5         | 6 | 0.47747836 | 1.23E-06 | 0.02251441 | 0.667 | 0.491 |
| AKAP12        | 6 | 0.47653363 | 3.24E-16 | 5.91E-12   | 0.406 | 0.054 |
| BNIP3         | 6 | 0.47346334 | 6.62E-18 | 1.21E-13   | 0.997 | 0.976 |
| PDLIM4        | 6 | 0.47088961 | 2.33E-14 | 4.26E-10   | 0.934 | 0.79  |
| RP11-367F23.2 | 6 | 0.47039663 | 1.81E-06 | 0.03301734 | 0.126 | 0     |
| CD44          | 6 | 0.46852143 | 1.58E-15 | 2.88E-11   | 0.921 | 0.659 |
| EVI2A         | 6 | 0.46736368 | 5.81E-17 | 1.06E-12   | 0.447 | 0.078 |
| PTGES         | 6 | 0.46232175 | 1.28E-15 | 2.33E-11   | 0.349 | 0.024 |
| SGIP1         | 6 | 0.45643619 | 1.50E-14 | 2.73E-10   | 0.374 | 0.054 |
| GPRC5A        | 6 | 0.45102115 | 2.06E-14 | 3.75E-10   | 0.437 | 0.096 |
| TNFSF11       | 6 | 0.45060214 | 8.09E-15 | 1.48E-10   | 0.308 | 0.006 |
| BCL2A1        | 6 | 0.45055471 | 7.77E-12 | 1.42E-07   | 0.239 | 0     |
| EIF4EBP1      | 6 | 0.45031563 | 5.32E-10 | 9.71E-06   | 0.789 | 0.635 |
| ARF6          | 6 | 0.44491609 | 2.62E-13 | 4.77E-09   | 0.72  | 0.431 |
| ENO1          | 6 | 0.44108238 | 3.69E-07 | 0.00673442 | 0.987 | 0.982 |
| CSGALNACT2    | 6 | 0.43905053 | 1.08E-13 | 1.97E-09   | 0.481 | 0.156 |
| PPFIBP1       | 6 | 0.43849508 | 5.09E-12 | 9.29E-08   | 0.689 | 0.401 |
| PDE4B         | 6 | 0.43704114 | 2.03E-11 | 3.70E-07   | 0.418 | 0.132 |
| VDAC1         | 6 | 0.43290885 | 3.50E-13 | 6.39E-09   | 0.887 | 0.784 |
| TMEM38B       | 6 | 0.43187801 | 1.59E-13 | 2.90E-09   | 0.594 | 0.269 |
| MT1M          | 6 | 0.43017516 | 3.30E-07 | 0.00601889 | 0.638 | 0.449 |
| LINC00493     | 6 | 0.42624713 | 4.01E-15 | 7.33E-11   | 0.921 | 0.719 |
| GRB10         | 6 | 0.4228689  | 2.41E-16 | 4.40E-12   | 0.362 | 0.024 |
| RNF126        | 6 | 0.41921535 | 6.00E-14 | 1.09E-09   | 0.475 | 0.144 |
| TFPI2         | 6 | 0.41612734 | 2.48E-07 | 0.00452281 | 0.157 | 0.006 |
| LTBP1         | 6 | 0.41571488 | 2.37E-14 | 4.33E-10   | 0.362 | 0.048 |
| EPS8          | 6 | 0.41428082 | 4.20E-12 | 7.67E-08   | 0.566 | 0.257 |
| PTGES3        | 6 | 0.41065277 | 2.07E-13 | 3.77E-09   | 0.94  | 0.916 |
| RNF145        | 6 | 0.41059159 | 2.80E-08 | 0.00051031 | 0.487 | 0.287 |
| FHL2          | 6 | 0.40554714 | 3.82E-10 | 6.97E-06   | 0.553 | 0.287 |
| COX17         | 6 | 0.39724737 | 1.21E-11 | 2.20E-07   | 0.855 | 0.623 |
| COPS2         | 6 | 0.39582943 | 8.70E-10 | 1.59E-05   | 0.638 | 0.419 |
| FAP           | 6 | 0.3911851  | 7.89E-12 | 1.44E-07   | 0.415 | 0.12  |
| ESD           | 6 | 0.39116214 | 1.83E-08 | 0.00033308 | 0.808 | 0.659 |
| MSANTD3       | 6 | 0.38851824 | 1.34E-11 | 2.45E-07   | 0.443 | 0.15  |
| EIF1B         | 6 | 0.3880452  | 2.43E-12 | 4.44E-08   | 0.78  | 0.527 |

|              |   |            |          |            |       |       |
|--------------|---|------------|----------|------------|-------|-------|
| SMS          | 6 | 0.38673212 | 3.66E-09 | 6.68E-05   | 0.711 | 0.497 |
| MIR4435-2HG  | 6 | 0.38271329 | 1.01E-08 | 0.00018441 | 0.5   | 0.251 |
| SAT2         | 6 | 0.38266749 | 4.21E-10 | 7.69E-06   | 0.799 | 0.569 |
| NBPF14       | 6 | 0.38044675 | 1.56E-11 | 2.85E-07   | 0.355 | 0.078 |
| FNIP2        | 6 | 0.37740409 | 5.05E-09 | 9.21E-05   | 0.469 | 0.228 |
| SPHK1        | 6 | 0.37345469 | 1.40E-10 | 2.56E-06   | 0.365 | 0.102 |
| EPB41L4A-AS1 | 6 | 0.37221008 | 8.15E-11 | 1.49E-06   | 0.887 | 0.754 |
| CAMK2D       | 6 | 0.37218372 | 3.67E-10 | 6.70E-06   | 0.497 | 0.222 |
| METAP2       | 6 | 0.37165463 | 3.89E-10 | 7.11E-06   | 0.799 | 0.569 |
| ARPP19       | 6 | 0.37139691 | 9.07E-09 | 0.00016547 | 0.635 | 0.407 |
| TBCA         | 6 | 0.37139454 | 3.31E-13 | 6.04E-09   | 0.969 | 0.868 |
| SQSTM1       | 6 | 0.37048061 | 2.95E-08 | 0.00053821 | 0.928 | 0.844 |
| ZNF385D      | 6 | 0.36948752 | 1.17E-08 | 0.00021395 | 0.72  | 0.497 |
| PTP4A1       | 6 | 0.36754334 | 2.31E-07 | 0.00422062 | 0.582 | 0.371 |
| WSB1         | 6 | 0.36705708 | 4.99E-08 | 0.00090968 | 0.761 | 0.611 |
| SH3BP5       | 6 | 0.36423208 | 9.45E-10 | 1.73E-05   | 0.522 | 0.263 |
| CLDND1       | 6 | 0.36227026 | 1.35E-10 | 2.46E-06   | 0.629 | 0.389 |
| KDM7A        | 6 | 0.36052577 | 4.95E-12 | 9.04E-08   | 0.377 | 0.09  |
| ABL2         | 6 | 0.35641868 | 2.08E-12 | 3.79E-08   | 0.437 | 0.132 |
| TMEM45A      | 6 | 0.35396408 | 1.30E-07 | 0.00237381 | 0.887 | 0.749 |
| PGK1         | 6 | 0.34831893 | 3.32E-07 | 0.00606107 | 0.918 | 0.916 |
| SLC3A2       | 6 | 0.34778674 | 5.44E-07 | 0.00993352 | 0.481 | 0.281 |
| SYF2         | 6 | 0.34704927 | 1.14E-09 | 2.09E-05   | 0.808 | 0.611 |
| SH3GLB1      | 6 | 0.34476716 | 1.83E-10 | 3.35E-06   | 0.783 | 0.527 |
| KLF3         | 6 | 0.34235309 | 5.31E-07 | 0.00968986 | 0.368 | 0.162 |
| TNC          | 6 | 0.341846   | 2.58E-10 | 4.71E-06   | 0.261 | 0.03  |
| ITGA5        | 6 | 0.34122603 | 9.32E-12 | 1.70E-07   | 0.428 | 0.12  |
| ATF4         | 6 | 0.33586383 | 1.17E-10 | 2.14E-06   | 0.95  | 0.82  |
| WDR45B       | 6 | 0.33376235 | 8.27E-09 | 0.00015087 | 0.459 | 0.21  |
| PFKP         | 6 | 0.3326649  | 1.01E-07 | 0.00185177 | 0.544 | 0.311 |
| SLC7A2       | 6 | 0.3312315  | 7.88E-10 | 1.44E-05   | 0.299 | 0.06  |
| PLIN2        | 6 | 0.33089507 | 9.97E-09 | 0.0001819  | 0.377 | 0.138 |
| RIPK2        | 6 | 0.32751848 | 7.75E-09 | 0.0001415  | 0.362 | 0.126 |
| SFT2D1       | 6 | 0.32457853 | 1.64E-09 | 3.00E-05   | 0.843 | 0.677 |
| EMP3         | 6 | 0.32340435 | 1.86E-09 | 3.40E-05   | 0.987 | 0.958 |
| CHMP4B       | 6 | 0.3219566  | 2.87E-08 | 0.00052372 | 0.73  | 0.533 |
| KCTD9        | 6 | 0.32154648 | 4.15E-10 | 7.58E-06   | 0.336 | 0.084 |
| NPR3         | 6 | 0.32102333 | 5.87E-11 | 1.07E-06   | 0.233 | 0.006 |
| EIF5         | 6 | 0.32089565 | 1.65E-07 | 0.00301246 | 0.792 | 0.605 |

|           |   |            |          |            |       |       |
|-----------|---|------------|----------|------------|-------|-------|
| UBE2B     | 6 | 0.3204999  | 7.35E-10 | 1.34E-05   | 0.836 | 0.635 |
| CYGB      | 6 | 0.31915939 | 1.05E-09 | 1.91E-05   | 0.305 | 0.066 |
| MEDAG     | 6 | 0.31865272 | 5.44E-08 | 0.00099309 | 0.28  | 0.072 |
| CLMP      | 6 | 0.31664292 | 8.25E-10 | 1.51E-05   | 0.459 | 0.192 |
| C11orf31  | 6 | 0.31659527 | 1.89E-07 | 0.00344917 | 0.821 | 0.695 |
| PPP1R14C  | 6 | 0.31462094 | 3.77E-08 | 0.00068861 | 0.365 | 0.138 |
| BTG3      | 6 | 0.31400257 | 4.82E-08 | 0.00087947 | 0.459 | 0.222 |
| LRRFIP1   | 6 | 0.31340292 | 3.50E-08 | 0.00063881 | 0.654 | 0.425 |
| HPCAL1    | 6 | 0.3133751  | 1.62E-06 | 0.02955109 | 0.371 | 0.18  |
| AK2       | 6 | 0.30795124 | 6.17E-07 | 0.01125103 | 0.761 | 0.629 |
| NDUFB4    | 6 | 0.30530103 | 7.72E-08 | 0.00140787 | 0.903 | 0.79  |
| CCT8      | 6 | 0.30358369 | 3.80E-07 | 0.00693613 | 0.711 | 0.563 |
| CLK1      | 6 | 0.30242956 | 1.57E-09 | 2.86E-05   | 0.619 | 0.377 |
| CAPZA2    | 6 | 0.29869557 | 9.10E-07 | 0.01660698 | 0.78  | 0.623 |
| AKIRIN2   | 6 | 0.29704833 | 9.17E-09 | 0.00016726 | 0.409 | 0.162 |
| ATP6V1C1  | 6 | 0.29508562 | 1.77E-10 | 3.22E-06   | 0.443 | 0.156 |
| FERMT2    | 6 | 0.29459007 | 9.00E-07 | 0.01642681 | 0.5   | 0.293 |
| ARRDC3    | 6 | 0.29388388 | 2.81E-07 | 0.00512021 | 0.531 | 0.293 |
| SMIM3     | 6 | 0.29351056 | 3.43E-09 | 6.26E-05   | 0.34  | 0.096 |
| TMEM18    | 6 | 0.29338199 | 5.43E-08 | 0.00099049 | 0.635 | 0.401 |
| CIRBP     | 6 | 0.29253843 | 1.32E-10 | 2.42E-06   | 0.987 | 0.964 |
| NOTCH2    | 6 | 0.29175958 | 3.98E-08 | 0.00072633 | 0.487 | 0.257 |
| RHOC      | 6 | 0.29115216 | 1.36E-07 | 0.0024774  | 0.909 | 0.796 |
| MRPL51    | 6 | 0.28529935 | 7.43E-08 | 0.00135524 | 0.874 | 0.76  |
| ERRFI1    | 6 | 0.28519231 | 4.81E-08 | 0.00087748 | 0.491 | 0.246 |
| C16orf13  | 6 | 0.2842973  | 4.12E-07 | 0.00752625 | 0.836 | 0.671 |
| TNS1      | 6 | 0.2839292  | 1.99E-09 | 3.62E-05   | 0.365 | 0.114 |
| CD58      | 6 | 0.28248966 | 1.73E-07 | 0.00315987 | 0.365 | 0.15  |
| C2orf49   | 6 | 0.27740113 | 1.37E-08 | 0.00025019 | 0.39  | 0.15  |
| MRPL54    | 6 | 0.27659047 | 2.96E-08 | 0.0005399  | 0.535 | 0.281 |
| RORA      | 6 | 0.27417303 | 5.20E-07 | 0.00948692 | 0.421 | 0.21  |
| PPP1R2    | 6 | 0.27403334 | 5.35E-08 | 0.00097703 | 0.522 | 0.281 |
| RHOD      | 6 | 0.27223316 | 5.50E-07 | 0.01004034 | 0.538 | 0.329 |
| ZNF581    | 6 | 0.27223316 | 4.19E-09 | 7.65E-05   | 0.522 | 0.246 |
| ZFYVE16   | 6 | 0.26894909 | 2.45E-09 | 4.47E-05   | 0.333 | 0.09  |
| PRR34-AS1 | 6 | 0.26782787 | 1.41E-06 | 0.02569854 | 0.267 | 0.09  |
| SAP18     | 6 | 0.26558862 | 2.65E-07 | 0.00484196 | 0.899 | 0.737 |
| IFRD1     | 6 | 0.26509311 | 1.19E-07 | 0.00217489 | 0.572 | 0.323 |
| SLC25A36  | 6 | 0.2648591  | 1.57E-06 | 0.02866147 | 0.538 | 0.323 |

|              |   |            |          |            |       |       |
|--------------|---|------------|----------|------------|-------|-------|
| AC090498.1   | 6 | 0.26392025 | 5.41E-13 | 9.88E-09   | 1     | 1     |
| GNPNAT1      | 6 | 0.26386491 | 8.79E-08 | 0.00160414 | 0.362 | 0.138 |
| TRMT112      | 6 | 0.26308397 | 6.21E-08 | 0.00113399 | 0.947 | 0.874 |
| SQRDL        | 6 | 0.26305411 | 7.60E-07 | 0.01387251 | 0.374 | 0.174 |
| LSM12        | 6 | 0.25934255 | 3.70E-08 | 0.00067566 | 0.412 | 0.168 |
| ARL4C        | 6 | 0.25214979 | 1.78E-09 | 3.25E-05   | 0.236 | 0.024 |
| CNIH1        | 6 | 0.25122188 | 5.87E-07 | 0.01071694 | 0.843 | 0.623 |
| CDKN2B       | 6 | 0.25111624 | 6.91E-07 | 0.01261198 | 0.343 | 0.138 |
| ERLEC1       | 6 | -0.2502266 | 8.65E-07 | 0.01579033 | 0.365 | 0.575 |
| IFT20        | 6 | -0.2502431 | 3.01E-08 | 0.00054956 | 0.179 | 0.401 |
| AFF3         | 6 | -0.2509003 | 5.52E-15 | 1.01E-10   | 0.016 | 0.228 |
| CHP1         | 6 | -0.251015  | 7.07E-07 | 0.01289363 | 0.22  | 0.419 |
| ANGPTL5      | 6 | -0.2512242 | 2.96E-09 | 5.40E-05   | 0.101 | 0.311 |
| ZCRB1        | 6 | -0.2540011 | 6.02E-08 | 0.00109828 | 0.393 | 0.629 |
| PRNP         | 6 | -0.2544755 | 6.07E-09 | 0.0001107  | 0.214 | 0.461 |
| ABHD14A      | 6 | -0.2547337 | 6.26E-12 | 1.14E-07   | 0.063 | 0.287 |
| SCP2         | 6 | -0.2558343 | 1.45E-08 | 0.00026468 | 0.333 | 0.587 |
| PRDX1        | 6 | -0.2560911 | 3.60E-07 | 0.00656585 | 0.836 | 0.922 |
| RPL31        | 6 | -0.2582605 | 5.82E-13 | 1.06E-08   | 1     | 1     |
| TMEM219      | 6 | -0.258486  | 1.02E-06 | 0.01867156 | 0.61  | 0.737 |
| MATN4        | 6 | -0.2589125 | 4.48E-08 | 0.00081727 | 0.053 | 0.216 |
| TSC22D3      | 6 | -0.259481  | 5.14E-08 | 0.000937   | 0.17  | 0.383 |
| CCDC88A      | 6 | -0.2605111 | 2.09E-11 | 3.82E-07   | 0.116 | 0.371 |
| CCNG1        | 6 | -0.2612179 | 3.94E-07 | 0.00719168 | 0.289 | 0.503 |
| FRMD4B       | 6 | -0.2612563 | 1.40E-10 | 2.55E-06   | 0.088 | 0.311 |
| MAGED1       | 6 | -0.2618493 | 1.19E-10 | 2.17E-06   | 0.066 | 0.275 |
| EFHD1        | 6 | -0.2618493 | 2.17E-10 | 3.96E-06   | 0.069 | 0.275 |
| CUTA         | 6 | -0.2620038 | 2.71E-07 | 0.00494694 | 0.695 | 0.856 |
| RPS25        | 6 | -0.2627162 | 1.28E-16 | 2.34E-12   | 1     | 1     |
| SNRPN        | 6 | -0.2628151 | 1.77E-06 | 0.03235746 | 0.503 | 0.701 |
| RP11-71N10.1 | 6 | -0.2631336 | 9.46E-15 | 1.73E-10   | 0.013 | 0.216 |
| GPAA1        | 6 | -0.2634076 | 4.39E-07 | 0.00801226 | 0.217 | 0.419 |
| CD63         | 6 | -0.263458  | 1.76E-06 | 0.0321417  | 1     | 1     |
| NDUFB11      | 6 | -0.2643509 | 2.68E-08 | 0.00048975 | 0.657 | 0.838 |
| C10orf54     | 6 | -0.2645679 | 2.68E-12 | 4.89E-08   | 0.069 | 0.305 |
| CTSC         | 6 | -0.2649792 | 2.07E-06 | 0.0376895  | 0.123 | 0.293 |
| BBX          | 6 | -0.2651595 | 6.71E-10 | 1.22E-05   | 0.201 | 0.455 |
| CREG1        | 6 | -0.2655371 | 2.54E-07 | 0.00463399 | 0.362 | 0.581 |
| CSGALNACT1   | 6 | -0.2666504 | 1.66E-08 | 0.00030309 | 0.135 | 0.347 |

|               |   |            |          |            |       |       |
|---------------|---|------------|----------|------------|-------|-------|
| FKBP11        | 6 | -0.2673419 | 8.74E-10 | 1.59E-05   | 0.119 | 0.347 |
| TCEB2         | 6 | -0.2674227 | 1.92E-09 | 3.50E-05   | 0.947 | 0.982 |
| HMG3          | 6 | -0.2685141 | 1.84E-09 | 3.36E-05   | 0.236 | 0.503 |
| PRUNE2        | 6 | -0.2686084 | 7.92E-08 | 0.00144497 | 0.123 | 0.317 |
| AC003090.1    | 6 | -0.2690826 | 7.82E-20 | 1.43E-15   | 0.016 | 0.287 |
| CYBRD1        | 6 | -0.2691979 | 4.33E-08 | 0.00079027 | 0.481 | 0.677 |
| ATP5A1        | 6 | -0.2695427 | 1.34E-07 | 0.00244938 | 0.437 | 0.635 |
| BTF3          | 6 | -0.2703636 | 1.79E-10 | 3.27E-06   | 0.991 | 1     |
| FAAP20        | 6 | -0.2705801 | 1.45E-08 | 0.00026416 | 0.443 | 0.701 |
| RPL27A        | 6 | -0.2715655 | 4.29E-22 | 7.83E-18   | 1     | 1     |
| RPL36A        | 6 | -0.2724612 | 5.44E-07 | 0.00993309 | 0.962 | 0.988 |
| CALM3         | 6 | -0.2725744 | 4.52E-08 | 0.00082535 | 0.519 | 0.731 |
| RPS24         | 6 | -0.272723  | 2.38E-15 | 4.34E-11   | 1     | 1     |
| TRPS1         | 6 | -0.2744753 | 4.27E-07 | 0.0078003  | 0.368 | 0.587 |
| RPL15         | 6 | -0.275137  | 1.32E-23 | 2.40E-19   | 1     | 1     |
| HINT2         | 6 | -0.2755234 | 3.69E-08 | 0.00067314 | 0.242 | 0.467 |
| MTDH          | 6 | -0.2758061 | 1.40E-06 | 0.02557388 | 0.566 | 0.713 |
| TSPAN3        | 6 | -0.2765652 | 2.60E-07 | 0.00475286 | 0.346 | 0.563 |
| COX6C         | 6 | -0.2769274 | 1.57E-07 | 0.00286881 | 0.83  | 0.934 |
| RP5-1097P24.1 | 6 | -0.2779234 | 3.94E-10 | 7.19E-06   | 0.088 | 0.305 |
| OST4          | 6 | -0.2783467 | 8.69E-13 | 1.59E-08   | 0.994 | 1     |
| EBPL          | 6 | -0.2785252 | 1.82E-09 | 3.32E-05   | 0.23  | 0.479 |
| RPS4Y1        | 6 | -0.2785978 | 1.85E-10 | 3.37E-06   | 0.991 | 0.988 |
| TCEAL3        | 6 | -0.2794959 | 2.05E-07 | 0.00374929 | 0.371 | 0.599 |
| RPL13         | 6 | -0.2800549 | 2.11E-22 | 3.84E-18   | 1     | 1     |
| RHOB          | 6 | -0.2809655 | 7.68E-13 | 1.40E-08   | 0.053 | 0.281 |
| ID1           | 6 | -0.2813174 | 4.62E-11 | 8.42E-07   | 0.151 | 0.419 |
| MPP6          | 6 | -0.2818012 | 6.36E-08 | 0.00116079 | 0.201 | 0.407 |
| S100A13       | 6 | -0.282059  | 1.93E-11 | 3.53E-07   | 0.991 | 0.994 |
| ZIC1          | 6 | -0.2827907 | 1.79E-10 | 3.27E-06   | 0.072 | 0.281 |
| TCEA2         | 6 | -0.2834757 | 2.26E-12 | 4.12E-08   | 0.201 | 0.515 |
| CMB9-22P13.1  | 6 | -0.284367  | 1.62E-08 | 0.00029508 | 0.261 | 0.497 |
| SLC26A2       | 6 | -0.2845296 | 7.82E-11 | 1.43E-06   | 0.085 | 0.311 |
| CTSD          | 6 | -0.2855925 | 6.06E-07 | 0.01106618 | 0.783 | 0.916 |
| RPL7A         | 6 | -0.2863525 | 3.94E-18 | 7.19E-14   | 1     | 1     |
| PKM           | 6 | -0.2875936 | 4.76E-07 | 0.00867792 | 0.871 | 0.976 |
| RNASET2       | 6 | -0.2896239 | 1.20E-10 | 2.18E-06   | 0.17  | 0.431 |
| SLC38A1       | 6 | -0.2897476 | 7.81E-11 | 1.43E-06   | 0.119 | 0.359 |
| DUT           | 6 | -0.2899304 | 6.66E-08 | 0.00121438 | 0.462 | 0.677 |



|          |   |            |          |            |       |       |
|----------|---|------------|----------|------------|-------|-------|
| TCEAL8   | 6 | -0.291837  | 2.39E-07 | 0.00436721 | 0.613 | 0.766 |
| SEC11C   | 6 | -0.2927844 | 9.53E-09 | 0.00017382 | 0.242 | 0.479 |
| WWP2     | 6 | -0.2933625 | 1.45E-08 | 0.00026535 | 0.318 | 0.581 |
| CALM2    | 6 | -0.2933891 | 1.78E-07 | 0.00324644 | 0.962 | 0.982 |
| ARPC1A   | 6 | -0.2934785 | 7.33E-09 | 0.00013373 | 0.447 | 0.671 |
| RPL5     | 6 | -0.2939056 | 1.31E-16 | 2.39E-12   | 1     | 1     |
| OTOS     | 6 | -0.294521  | 5.15E-16 | 9.39E-12   | 0.057 | 0.335 |
| CD81     | 6 | -0.2957509 | 1.36E-07 | 0.00247481 | 0.22  | 0.437 |
| GTF3A    | 6 | -0.2963113 | 1.13E-09 | 2.06E-05   | 0.311 | 0.569 |
| TIMP4    | 6 | -0.2964432 | 4.18E-12 | 7.63E-08   | 0.119 | 0.383 |
| COPZ2    | 6 | -0.2969141 | 1.71E-11 | 3.12E-07   | 0.116 | 0.365 |
| PPA1     | 6 | -0.2981339 | 1.09E-06 | 0.01981513 | 0.387 | 0.575 |
| C1orf122 | 6 | -0.2985559 | 3.20E-09 | 5.83E-05   | 0.302 | 0.557 |
| SOCS3    | 6 | -0.2988991 | 1.37E-06 | 0.02502371 | 0.135 | 0.311 |
| SSR3     | 6 | -0.2989434 | 2.52E-07 | 0.00459659 | 0.78  | 0.91  |
| CKAP4    | 6 | -0.3008791 | 2.46E-10 | 4.48E-06   | 0.204 | 0.455 |
| SOD1     | 6 | -0.3009289 | 1.47E-10 | 2.67E-06   | 0.925 | 0.988 |
| RPS21    | 6 | -0.3011128 | 9.49E-17 | 1.73E-12   | 1     | 1     |
| HMGB1    | 6 | -0.3014466 | 5.68E-09 | 0.00010361 | 0.708 | 0.874 |
| RPL21    | 6 | -0.3025989 | 4.34E-22 | 7.92E-18   | 1     | 1     |
| RPL22    | 6 | -0.3030177 | 1.89E-15 | 3.45E-11   | 1     | 1     |
| PLPP1    | 6 | -0.3030425 | 3.84E-07 | 0.00700163 | 0.11  | 0.281 |
| UQCRB    | 6 | -0.3037318 | 3.12E-07 | 0.00568561 | 0.956 | 0.964 |
| SLC44A1  | 6 | -0.3043191 | 1.09E-10 | 1.99E-06   | 0.142 | 0.389 |
| TMEM14A  | 6 | -0.3047511 | 5.57E-12 | 1.02E-07   | 0.258 | 0.569 |
| C9orf16  | 6 | -0.3055466 | 2.81E-07 | 0.00513225 | 0.358 | 0.581 |
| UGP2     | 6 | -0.3057786 | 1.45E-08 | 0.00026424 | 0.465 | 0.701 |
| NME4     | 6 | -0.30579   | 4.21E-09 | 7.69E-05   | 0.296 | 0.539 |
| NFIC     | 6 | -0.3061858 | 1.28E-06 | 0.02335513 | 0.283 | 0.467 |
| TOMM7    | 6 | -0.3082629 | 1.01E-19 | 1.84E-15   | 1     | 1     |
| ATRNL1   | 6 | -0.3093433 | 2.11E-14 | 3.85E-10   | 0.072 | 0.335 |
| UBA52    | 6 | -0.3098061 | 4.17E-22 | 7.62E-18   | 1     | 1     |
| SRM      | 6 | -0.30982   | 3.60E-09 | 6.58E-05   | 0.327 | 0.581 |
| C1orf21  | 6 | -0.3107549 | 6.92E-09 | 0.00012634 | 0.286 | 0.533 |
| COMMD6   | 6 | -0.3109014 | 9.47E-16 | 1.73E-11   | 0.991 | 1     |
| MYL12B   | 6 | -0.3112316 | 8.67E-08 | 0.00158212 | 0.591 | 0.743 |
| DMKN     | 6 | -0.3116495 | 7.51E-11 | 1.37E-06   | 0.305 | 0.587 |
| SSR2     | 6 | -0.3120949 | 4.27E-10 | 7.79E-06   | 0.796 | 0.934 |
| ERP29    | 6 | -0.3122043 | 3.70E-09 | 6.76E-05   | 0.616 | 0.778 |

|          |   |            |          |            |       |       |
|----------|---|------------|----------|------------|-------|-------|
| VIM      | 6 | -0.312259  | 4.41E-07 | 0.00805038 | 0.994 | 1     |
| LUC7L3   | 6 | -0.3122802 | 1.79E-10 | 3.26E-06   | 0.261 | 0.539 |
| RPL29    | 6 | -0.3128127 | 1.13E-24 | 2.05E-20   | 1     | 1     |
| GRN      | 6 | -0.312963  | 1.05E-12 | 1.92E-08   | 0.16  | 0.455 |
| RPS3     | 6 | -0.3142583 | 7.47E-26 | 1.36E-21   | 1     | 1     |
| CFL1     | 6 | -0.3151436 | 1.36E-07 | 0.00248187 | 0.833 | 0.88  |
| AK1      | 6 | -0.3153319 | 1.75E-07 | 0.00319934 | 0.739 | 0.898 |
| BHLHE41  | 6 | -0.3158413 | 2.11E-10 | 3.86E-06   | 0.151 | 0.407 |
| RRBP1    | 6 | -0.3169972 | 6.46E-09 | 0.00011779 | 0.236 | 0.485 |
| TMEM14C  | 6 | -0.3178165 | 1.38E-09 | 2.51E-05   | 0.516 | 0.76  |
| SSPN     | 6 | -0.3190577 | 2.27E-12 | 4.15E-08   | 0.119 | 0.389 |
| ARHGAP29 | 6 | -0.3213844 | 5.24E-10 | 9.56E-06   | 0.308 | 0.581 |
| FADS1    | 6 | -0.3222699 | 9.62E-17 | 1.75E-12   | 0.057 | 0.341 |
| RPL6     | 6 | -0.3234601 | 1.56E-20 | 2.84E-16   | 1     | 1     |
| LSP1     | 6 | -0.3247042 | 3.60E-07 | 0.00657132 | 0.214 | 0.413 |
| PPIA     | 6 | -0.3260131 | 3.39E-11 | 6.18E-07   | 0.943 | 1     |
| CP       | 6 | -0.3270712 | 3.77E-07 | 0.0068735  | 0.522 | 0.707 |
| C9orf3   | 6 | -0.3271051 | 6.46E-10 | 1.18E-05   | 0.211 | 0.467 |
| ERH      | 6 | -0.3274164 | 5.49E-10 | 1.00E-05   | 0.594 | 0.808 |
| C1QTNF8  | 6 | -0.3278603 | 2.42E-14 | 4.41E-10   | 0.044 | 0.281 |
| INHBA    | 6 | -0.3281401 | 2.20E-12 | 4.02E-08   | 0.179 | 0.479 |
| ENPP1    | 6 | -0.3283625 | 1.71E-12 | 3.12E-08   | 0.11  | 0.377 |
| RPS9     | 6 | -0.32931   | 1.49E-25 | 2.72E-21   | 1     | 1     |
| PPP1R3C  | 6 | -0.3297446 | 3.34E-07 | 0.00609624 | 0.327 | 0.545 |
| NREP     | 6 | -0.3304    | 1.67E-13 | 3.05E-09   | 0.116 | 0.401 |
| CDK2AP2  | 6 | -0.3305221 | 2.45E-07 | 0.00447414 | 0.255 | 0.461 |
| EIF3K    | 6 | -0.331037  | 1.43E-12 | 2.61E-08   | 0.802 | 0.934 |
| RNF130   | 6 | -0.331613  | 1.20E-08 | 0.00021826 | 0.374 | 0.587 |
| CETN2    | 6 | -0.3317697 | 3.12E-11 | 5.70E-07   | 0.189 | 0.455 |
| DSTN     | 6 | -0.3327439 | 2.22E-13 | 4.05E-09   | 1     | 1     |
| HINT1    | 6 | -0.3339557 | 8.54E-15 | 1.56E-10   | 0.972 | 1     |
| MYEOV2   | 6 | -0.3344176 | 2.75E-09 | 5.02E-05   | 0.632 | 0.808 |
| NDUFA3   | 6 | -0.3345937 | 1.46E-09 | 2.67E-05   | 0.421 | 0.659 |
| RPS10    | 6 | -0.3349614 | 1.72E-14 | 3.15E-10   | 0.981 | 1     |
| RPS7     | 6 | -0.3349996 | 4.13E-23 | 7.54E-19   | 1     | 1     |
| BRK1     | 6 | -0.3356984 | 1.13E-10 | 2.07E-06   | 0.805 | 0.97  |
| SLC14A1  | 6 | -0.3360146 | 1.53E-10 | 2.79E-06   | 0.248 | 0.527 |
| JUN      | 6 | -0.3377782 | 7.37E-08 | 0.00134394 | 0.182 | 0.389 |
| DST      | 6 | -0.338393  | 1.62E-10 | 2.95E-06   | 0.396 | 0.653 |

|             |   |            |          |            |       |       |
|-------------|---|------------|----------|------------|-------|-------|
| RPL35       | 6 | -0.3386632 | 7.90E-26 | 1.44E-21   | 1     | 1     |
| TMED2       | 6 | -0.3392691 | 3.61E-12 | 6.58E-08   | 0.843 | 0.946 |
| XAGE2       | 6 | -0.3395684 | 3.84E-09 | 7.00E-05   | 0.006 | 0.126 |
| CRELD2      | 6 | -0.3397166 | 2.52E-15 | 4.60E-11   | 0.079 | 0.359 |
| RCN3        | 6 | -0.3401289 | 2.09E-10 | 3.82E-06   | 0.195 | 0.449 |
| CALM1       | 6 | -0.340722  | 2.49E-10 | 4.55E-06   | 0.465 | 0.725 |
| RCN1        | 6 | -0.3408713 | 1.21E-10 | 2.21E-06   | 0.336 | 0.617 |
| MOXD1       | 6 | -0.3415024 | 2.21E-09 | 4.03E-05   | 0.261 | 0.503 |
| SERTAD4-AS1 | 6 | -0.3419452 | 8.85E-18 | 1.62E-13   | 0.088 | 0.413 |
| CCPG1       | 6 | -0.3436535 | 8.53E-09 | 0.00015559 | 0.371 | 0.611 |
| MALL        | 6 | -0.343953  | 2.29E-09 | 4.17E-05   | 0.204 | 0.449 |
| GAS6        | 6 | -0.3443375 | 7.82E-14 | 1.43E-09   | 0.179 | 0.491 |
| SPTLC3      | 6 | -0.3443661 | 6.15E-10 | 1.12E-05   | 0.123 | 0.347 |
| ARL2BP      | 6 | -0.3447673 | 2.96E-10 | 5.40E-06   | 0.403 | 0.665 |
| ITM2B       | 6 | -0.3452022 | 1.69E-08 | 0.00030874 | 0.94  | 0.988 |
| FCGRT       | 6 | -0.3465037 | 2.08E-09 | 3.80E-05   | 0.412 | 0.635 |
| DDOST       | 6 | -0.346806  | 2.28E-11 | 4.15E-07   | 0.261 | 0.545 |
| P4HA1       | 6 | -0.3484881 | 1.19E-06 | 0.02178682 | 0.572 | 0.701 |
| TSPAN4      | 6 | -0.3496596 | 1.19E-08 | 0.00021666 | 0.418 | 0.617 |
| CHID1       | 6 | -0.3507098 | 3.75E-10 | 6.84E-06   | 0.374 | 0.623 |
| TMED9       | 6 | -0.3513546 | 2.21E-09 | 4.04E-05   | 0.522 | 0.743 |
| VCAN        | 6 | -0.351388  | 1.25E-11 | 2.29E-07   | 0.176 | 0.461 |
| RPL37A      | 6 | -0.3521774 | 3.14E-29 | 5.73E-25   | 1     | 1     |
| ZBTB20      | 6 | -0.3527058 | 1.55E-15 | 2.82E-11   | 0.126 | 0.443 |
| DBI         | 6 | -0.352879  | 1.47E-08 | 0.00026872 | 0.66  | 0.832 |
| TMED3       | 6 | -0.3529473 | 3.46E-09 | 6.31E-05   | 0.406 | 0.611 |
| RPS4X       | 6 | -0.353448  | 1.39E-31 | 2.54E-27   | 1     | 1     |
| RPL18A      | 6 | -0.3541053 | 6.07E-28 | 1.11E-23   | 1     | 1     |
| RPL8        | 6 | -0.3544231 | 3.13E-28 | 5.71E-24   | 1     | 1     |
| CHPT1       | 6 | -0.3545523 | 1.89E-09 | 3.45E-05   | 0.465 | 0.701 |
| PNKD        | 6 | -0.3546646 | 4.54E-14 | 8.29E-10   | 0.189 | 0.503 |
| ATPIF1      | 6 | -0.3548335 | 6.87E-10 | 1.25E-05   | 0.566 | 0.778 |
| UQCRH       | 6 | -0.3552711 | 2.46E-15 | 4.48E-11   | 0.921 | 0.976 |
| HERPUD1     | 6 | -0.3563755 | 1.84E-09 | 3.36E-05   | 0.374 | 0.611 |
| RPS5        | 6 | -0.3565861 | 4.61E-26 | 8.42E-22   | 1     | 1     |
| EIF4B       | 6 | -0.3582154 | 2.17E-10 | 3.96E-06   | 0.714 | 0.874 |
| CMPK1       | 6 | -0.3587368 | 7.96E-13 | 1.45E-08   | 0.654 | 0.868 |
| PRDX5       | 6 | -0.3587856 | 5.76E-12 | 1.05E-07   | 0.836 | 0.952 |
| LMAN2       | 6 | -0.3615819 | 2.38E-10 | 4.34E-06   | 0.318 | 0.581 |

|           |   |            |          |            |       |       |
|-----------|---|------------|----------|------------|-------|-------|
| ENAH      | 6 | -0.3618251 | 8.34E-13 | 1.52E-08   | 0.129 | 0.401 |
| PRKCDBP   | 6 | -0.3619465 | 9.17E-10 | 1.67E-05   | 0.437 | 0.671 |
| RPL10     | 6 | -0.3638291 | 2.92E-32 | 5.33E-28   | 0.997 | 1     |
| SLC1A5    | 6 | -0.3647437 | 1.84E-14 | 3.36E-10   | 0.113 | 0.401 |
| RPS27A    | 6 | -0.3651281 | 5.63E-27 | 1.03E-22   | 1     | 1     |
| NDUFA4L2  | 6 | -0.3658861 | 2.44E-18 | 4.45E-14   | 1     | 0.994 |
| LITAF     | 6 | -0.3667383 | 4.13E-10 | 7.53E-06   | 0.403 | 0.659 |
| TMEM59    | 6 | -0.367482  | 2.04E-12 | 3.73E-08   | 0.956 | 0.994 |
| AP2M1     | 6 | -0.369089  | 1.05E-12 | 1.92E-08   | 0.387 | 0.677 |
| PDIA4     | 6 | -0.3704079 | 6.98E-12 | 1.27E-07   | 0.211 | 0.497 |
| RCN2      | 6 | -0.3708535 | 2.84E-09 | 5.18E-05   | 0.566 | 0.76  |
| CTSK      | 6 | -0.3709212 | 3.28E-16 | 5.98E-12   | 0.132 | 0.449 |
| RPS13     | 6 | -0.3711518 | 4.36E-24 | 7.96E-20   | 1     | 1     |
| TMEM230   | 6 | -0.3745029 | 1.04E-11 | 1.89E-07   | 0.607 | 0.832 |
| TIMP2     | 6 | -0.3760413 | 8.13E-12 | 1.48E-07   | 0.538 | 0.784 |
| RPL18     | 6 | -0.3762154 | 7.31E-27 | 1.33E-22   | 1     | 1     |
| PFN1      | 6 | -0.3772934 | 4.00E-12 | 7.31E-08   | 0.896 | 0.964 |
| HLA-C     | 6 | -0.3780281 | 1.23E-10 | 2.24E-06   | 0.802 | 0.904 |
| LUM       | 6 | -0.3785033 | 3.32E-16 | 6.07E-12   | 0.997 | 0.994 |
| JTB       | 6 | -0.3795784 | 4.47E-12 | 8.16E-08   | 0.629 | 0.838 |
| RPS29     | 6 | -0.380701  | 5.40E-26 | 9.86E-22   | 1     | 1     |
| NAA38     | 6 | -0.3816933 | 8.23E-12 | 1.50E-07   | 0.456 | 0.713 |
| BEX2      | 6 | -0.3827264 | 7.41E-09 | 0.00013527 | 0.176 | 0.395 |
| SEC61B    | 6 | -0.3857392 | 2.06E-12 | 3.75E-08   | 0.789 | 0.94  |
| MEG3      | 6 | -0.386969  | 2.15E-09 | 3.92E-05   | 0.192 | 0.425 |
| SEPP1     | 6 | -0.3895277 | 1.77E-17 | 3.23E-13   | 0.11  | 0.437 |
| NINJ1     | 6 | -0.389778  | 2.13E-13 | 3.89E-09   | 0.431 | 0.749 |
| KDEL3     | 6 | -0.3900368 | 3.40E-16 | 6.21E-12   | 0.126 | 0.455 |
| MLEC      | 6 | -0.3913849 | 1.66E-15 | 3.03E-11   | 0.264 | 0.611 |
| LINC01503 | 6 | -0.391985  | 1.30E-10 | 2.38E-06   | 0.157 | 0.401 |
| PSAP      | 6 | -0.3928949 | 3.20E-13 | 5.84E-09   | 0.777 | 0.94  |
| RPL23A    | 6 | -0.3932649 | 8.93E-31 | 1.63E-26   | 1     | 1     |
| OAF       | 6 | -0.3938331 | 7.48E-15 | 1.36E-10   | 0.176 | 0.497 |
| NENF      | 6 | -0.3940481 | 7.29E-17 | 1.33E-12   | 0.893 | 0.988 |
| RPS23     | 6 | -0.3990425 | 1.73E-32 | 3.16E-28   | 1     | 1     |
| RPL37     | 6 | -0.3999302 | 5.60E-31 | 1.02E-26   | 1     | 1     |
| PPT1      | 6 | -0.4006088 | 6.23E-17 | 1.14E-12   | 0.201 | 0.557 |
| SPINT2    | 6 | -0.4009315 | 2.10E-12 | 3.84E-08   | 0.242 | 0.539 |
| RPL19     | 6 | -0.401271  | 2.47E-36 | 4.51E-32   | 1     | 1     |

|          |   |            |          |            |       |       |
|----------|---|------------|----------|------------|-------|-------|
| CITED2   | 6 | -0.4015897 | 5.97E-10 | 1.09E-05   | 0.214 | 0.455 |
| PCBP2    | 6 | -0.4051014 | 3.29E-20 | 5.99E-16   | 0.877 | 0.976 |
| SRP14    | 6 | -0.4051657 | 4.63E-14 | 8.45E-10   | 0.953 | 1     |
| MYDGF    | 6 | -0.4063859 | 1.34E-10 | 2.44E-06   | 0.758 | 0.886 |
| PRSS23   | 6 | -0.4064312 | 6.34E-07 | 0.01157096 | 0.399 | 0.605 |
| SSR1     | 6 | -0.4065842 | 1.20E-10 | 2.19E-06   | 0.418 | 0.647 |
| RPS19    | 6 | -0.4075061 | 5.68E-25 | 1.04E-20   | 1     | 1     |
| CRISPLD1 | 6 | -0.4082956 | 1.97E-23 | 3.59E-19   | 0.003 | 0.293 |
| RPS6     | 6 | -0.4083023 | 1.04E-35 | 1.89E-31   | 1     | 1     |
| SCRG1    | 6 | -0.4108354 | 2.31E-09 | 4.22E-05   | 0.953 | 0.994 |
| IER2     | 6 | -0.4121548 | 4.03E-08 | 0.00073478 | 0.267 | 0.485 |
| RPS18    | 6 | -0.4135725 | 9.47E-35 | 1.73E-30   | 1     | 1     |
| CNPY2    | 6 | -0.4140725 | 6.76E-14 | 1.23E-09   | 0.456 | 0.754 |
| FTL      | 6 | -0.4147216 | 1.28E-27 | 2.34E-23   | 1     | 1     |
| HMG2     | 6 | -0.4158597 | 1.65E-13 | 3.01E-09   | 0.723 | 0.88  |
| SH3BGRL  | 6 | -0.4170001 | 2.96E-15 | 5.41E-11   | 0.286 | 0.635 |
| CCDC102B | 6 | -0.4170604 | 9.40E-25 | 1.72E-20   | 0.022 | 0.359 |
| C14orf1  | 6 | -0.4202453 | 1.88E-17 | 3.44E-13   | 0.151 | 0.497 |
| RPL9     | 6 | -0.4204674 | 2.17E-32 | 3.95E-28   | 1     | 1     |
| FKBP10   | 6 | -0.4220075 | 4.24E-11 | 7.74E-07   | 0.327 | 0.587 |
| NFIA     | 6 | -0.4230364 | 6.02E-21 | 1.10E-16   | 0.094 | 0.461 |
| C7orf73  | 6 | -0.4233689 | 3.05E-15 | 5.56E-11   | 0.607 | 0.898 |
| PDE4DIP  | 6 | -0.4264679 | 6.46E-15 | 1.18E-10   | 0.22  | 0.539 |
| HDLBP    | 6 | -0.4282236 | 2.43E-16 | 4.43E-12   | 0.296 | 0.635 |
| RPL27    | 6 | -0.4294897 | 1.36E-27 | 2.48E-23   | 1     | 1     |
| PLXDC2   | 6 | -0.4295401 | 2.15E-16 | 3.92E-12   | 0.208 | 0.551 |
| COL5A2   | 6 | -0.4300711 | 7.95E-14 | 1.45E-09   | 0.252 | 0.587 |
| SMIM14   | 6 | -0.4303704 | 1.85E-15 | 3.38E-11   | 0.252 | 0.587 |
| GSTP1    | 6 | -0.4307476 | 1.96E-15 | 3.57E-11   | 0.943 | 0.988 |
| SEC11A   | 6 | -0.4309213 | 3.02E-17 | 5.50E-13   | 0.792 | 0.958 |
| ASPN     | 6 | -0.4320459 | 1.68E-09 | 3.07E-05   | 0.035 | 0.198 |
| MORF4L2  | 6 | -0.432952  | 1.09E-13 | 1.99E-09   | 0.475 | 0.749 |
| RPS16    | 6 | -0.4338372 | 1.45E-31 | 2.64E-27   | 1     | 1     |
| ID4      | 6 | -0.4342752 | 5.97E-10 | 1.09E-05   | 0.368 | 0.623 |
| KDELR2   | 6 | -0.4414337 | 2.76E-16 | 5.04E-12   | 0.877 | 0.952 |
| GSN      | 6 | -0.4416256 | 1.06E-14 | 1.93E-10   | 0.283 | 0.617 |
| PPIB     | 6 | -0.4480406 | 4.44E-12 | 8.10E-08   | 0.865 | 0.94  |
| LRPAP1   | 6 | -0.4491005 | 1.29E-16 | 2.36E-12   | 0.314 | 0.647 |
| PEBP1    | 6 | -0.4497074 | 2.89E-16 | 5.28E-12   | 0.67  | 0.88  |

|          |   |            |          |            |       |       |
|----------|---|------------|----------|------------|-------|-------|
| RPL3     | 6 | -0.4512254 | 2.93E-33 | 5.35E-29   | 1     | 1     |
| RPL13A   | 6 | -0.4514293 | 1.69E-41 | 3.09E-37   | 1     | 1     |
| AHNAK    | 6 | -0.4524748 | 1.14E-14 | 2.07E-10   | 0.377 | 0.689 |
| GOLIM4   | 6 | -0.4536697 | 2.45E-13 | 4.47E-09   | 0.252 | 0.563 |
| RPS2     | 6 | -0.4539384 | 7.96E-37 | 1.45E-32   | 1     | 1     |
| TPM2     | 6 | -0.4539749 | 1.07E-15 | 1.96E-11   | 0.478 | 0.79  |
| VKORC1   | 6 | -0.4566165 | 1.07E-13 | 1.96E-09   | 0.947 | 0.982 |
| MSMO1    | 6 | -0.457074  | 1.98E-12 | 3.62E-08   | 0.186 | 0.461 |
| RPL23    | 6 | -0.4610786 | 2.69E-30 | 4.91E-26   | 1     | 1     |
| SNAI2    | 6 | -0.4613521 | 1.28E-12 | 2.34E-08   | 0.374 | 0.671 |
| MALAT1   | 6 | -0.4617399 | 3.75E-08 | 0.00068499 | 1     | 1     |
| NDUFA11  | 6 | -0.4647749 | 4.06E-17 | 7.41E-13   | 0.824 | 0.946 |
| H3F3A    | 6 | -0.4681417 | 1.97E-23 | 3.60E-19   | 0.943 | 0.994 |
| CCNI     | 6 | -0.4700262 | 5.58E-22 | 1.02E-17   | 0.987 | 1     |
| MT-ND5   | 6 | -0.4796174 | 5.29E-11 | 9.66E-07   | 0.421 | 0.641 |
| RPL34    | 6 | -0.484525  | 1.24E-35 | 2.26E-31   | 1     | 1     |
| GNAS     | 6 | -0.484564  | 8.59E-19 | 1.57E-14   | 0.506 | 0.808 |
| RPL30    | 6 | -0.4863418 | 6.13E-35 | 1.12E-30   | 1     | 1     |
| TPD52L1  | 6 | -0.4865512 | 1.02E-18 | 1.86E-14   | 0.204 | 0.581 |
| RPN2     | 6 | -0.4871634 | 3.55E-24 | 6.47E-20   | 0.126 | 0.545 |
| PABPC1   | 6 | -0.4935277 | 8.24E-19 | 1.50E-14   | 0.742 | 0.94  |
| TCF4     | 6 | -0.4939053 | 1.79E-15 | 3.27E-11   | 0.223 | 0.557 |
| ERGIC3   | 6 | -0.4942177 | 5.08E-21 | 9.28E-17   | 0.698 | 0.946 |
| FTH1     | 6 | -0.496065  | 3.67E-32 | 6.70E-28   | 1     | 1     |
| NOVA1    | 6 | -0.4972637 | 1.58E-09 | 2.88E-05   | 0.777 | 0.856 |
| COL11A2  | 6 | -0.4974541 | 2.42E-17 | 4.41E-13   | 0.299 | 0.641 |
| MYL6     | 6 | -0.4976589 | 6.21E-20 | 1.13E-15   | 0.921 | 0.988 |
| SDF4     | 6 | -0.4999086 | 6.01E-15 | 1.10E-10   | 0.465 | 0.707 |
| DDR2     | 6 | -0.5040443 | 8.12E-17 | 1.48E-12   | 0.208 | 0.551 |
| AHNAK2   | 6 | -0.5047683 | 3.88E-13 | 7.07E-09   | 0.236 | 0.533 |
| BSG      | 6 | -0.5062936 | 2.11E-16 | 3.86E-12   | 0.513 | 0.778 |
| RPS12    | 6 | -0.5123986 | 4.09E-37 | 7.47E-33   | 1     | 1     |
| SERPINA5 | 6 | -0.5136405 | 1.73E-17 | 3.16E-13   | 0.321 | 0.671 |
| RPLP2    | 6 | -0.5156029 | 1.20E-47 | 2.20E-43   | 1     | 1     |
| FHL1     | 6 | -0.5162242 | 5.13E-20 | 9.36E-16   | 0.201 | 0.587 |
| CD9      | 6 | -0.5165308 | 1.21E-13 | 2.21E-09   | 0.462 | 0.731 |
| CRYAB    | 6 | -0.5181123 | 1.32E-14 | 2.41E-10   | 0.619 | 0.874 |
| MT-ND4   | 6 | -0.5181911 | 2.20E-17 | 4.02E-13   | 0.953 | 0.976 |
| FAM46A   | 6 | -0.5207594 | 1.16E-07 | 0.0021185  | 0.374 | 0.545 |

|         |   |            |          |            |       |       |
|---------|---|------------|----------|------------|-------|-------|
| RHOBTB3 | 6 | -0.5226244 | 3.23E-18 | 5.88E-14   | 0.296 | 0.659 |
| RPS3A   | 6 | -0.5231907 | 1.05E-44 | 1.91E-40   | 1     | 1     |
| EID1    | 6 | -0.5234296 | 1.62E-20 | 2.96E-16   | 0.824 | 0.964 |
| RPLP1   | 6 | -0.5265939 | 1.34E-47 | 2.45E-43   | 1     | 1     |
| EEF1B2  | 6 | -0.5287061 | 3.37E-27 | 6.15E-23   | 0.959 | 0.994 |
| ARL6IP5 | 6 | -0.5300481 | 1.65E-17 | 3.02E-13   | 0.425 | 0.737 |
| CCDC80  | 6 | -0.533381  | 4.73E-11 | 8.63E-07   | 0.698 | 0.88  |
| ATRAID  | 6 | -0.5346512 | 4.70E-20 | 8.58E-16   | 0.66  | 0.904 |
| JUNB    | 6 | -0.536462  | 2.14E-11 | 3.90E-07   | 0.481 | 0.713 |
| ARPC1B  | 6 | -0.5405169 | 3.97E-17 | 7.24E-13   | 0.428 | 0.76  |
| NPC2    | 6 | -0.5409892 | 1.07E-23 | 1.95E-19   | 0.943 | 0.994 |
| NUPR1   | 6 | -0.544155  | 1.32E-14 | 2.41E-10   | 0.947 | 0.994 |
| PCOLCE2 | 6 | -0.5445393 | 1.44E-12 | 2.64E-08   | 0.792 | 0.934 |
| SDC2    | 6 | -0.5450975 | 1.96E-22 | 3.58E-18   | 0.635 | 0.934 |
| RPS17   | 6 | -0.5452898 | 3.64E-43 | 6.65E-39   | 1     | 1     |
| PDIA3   | 6 | -0.5461647 | 2.28E-13 | 4.16E-09   | 0.409 | 0.665 |
| CXXC5   | 6 | -0.5474307 | 1.81E-21 | 3.30E-17   | 0.164 | 0.557 |
| MYLK    | 6 | -0.5562269 | 4.91E-23 | 8.95E-19   | 0.047 | 0.389 |
| SLC40A1 | 6 | -0.5567647 | 9.55E-27 | 1.74E-22   | 0.016 | 0.365 |
| S100A1  | 6 | -0.5619224 | 2.21E-23 | 4.02E-19   | 0.991 | 1     |
| NUCB2   | 6 | -0.5654366 | 1.02E-21 | 1.86E-17   | 0.217 | 0.617 |
| TTC3    | 6 | -0.566528  | 1.05E-20 | 1.91E-16   | 0.472 | 0.814 |
| RABAC1  | 6 | -0.5711819 | 4.34E-27 | 7.92E-23   | 0.72  | 0.946 |
| CALR    | 6 | -0.5731058 | 1.74E-10 | 3.17E-06   | 0.575 | 0.766 |
| ZFP36L2 | 6 | -0.5745108 | 1.03E-12 | 1.87E-08   | 0.16  | 0.431 |
| MFGE8   | 6 | -0.574761  | 3.14E-19 | 5.72E-15   | 0.698 | 0.946 |
| RPL10A  | 6 | -0.5775313 | 2.28E-48 | 4.15E-44   | 1     | 1     |
| CTGF    | 6 | -0.5874539 | 1.33E-07 | 0.00242328 | 0.324 | 0.545 |
| SPON2   | 6 | -0.5906324 | 8.55E-24 | 1.56E-19   | 0.063 | 0.437 |
| PRDX4   | 6 | -0.5918718 | 7.60E-18 | 1.39E-13   | 0.597 | 0.874 |
| CEBPD   | 6 | -0.5945884 | 1.48E-12 | 2.70E-08   | 0.487 | 0.754 |
| CRIP2   | 6 | -0.5949406 | 2.87E-24 | 5.24E-20   | 0.314 | 0.743 |
| SOD3    | 6 | -0.5968134 | 1.89E-13 | 3.44E-09   | 0.94  | 0.994 |
| HNRNPA1 | 6 | -0.5970515 | 4.60E-24 | 8.39E-20   | 0.959 | 0.994 |
| HSP90B1 | 6 | -0.5991826 | 6.18E-19 | 1.13E-14   | 0.594 | 0.904 |
| TPT1    | 6 | -0.6020619 | 9.23E-46 | 1.68E-41   | 1     | 1     |
| POLR2L  | 6 | -0.6034016 | 2.66E-19 | 4.86E-15   | 0.814 | 0.952 |
| RPL7    | 6 | -0.6133927 | 3.41E-42 | 6.21E-38   | 1     | 1     |
| FGFBP2  | 6 | -0.6156054 | 3.46E-12 | 6.32E-08   | 0.855 | 0.94  |

|         |   |            |          |          |       |       |
|---------|---|------------|----------|----------|-------|-------|
| RPS8    | 6 | -0.6179191 | 3.97E-51 | 7.24E-47 | 1     | 1     |
| RPSA    | 6 | -0.6203072 | 7.29E-35 | 1.33E-30 | 0.994 | 1     |
| FXVD6   | 6 | -0.6313903 | 3.37E-28 | 6.15E-24 | 0.651 | 0.94  |
| FMOD    | 6 | -0.6321591 | 3.29E-28 | 6.00E-24 | 0.726 | 0.982 |
| SERF2   | 6 | -0.6343204 | 7.43E-36 | 1.36E-31 | 1     | 1     |
| SSR4    | 6 | -0.6375429 | 1.01E-29 | 1.84E-25 | 0.928 | 0.994 |
| FOS     | 6 | -0.6380635 | 5.88E-17 | 1.07E-12 | 0.336 | 0.683 |
| TMED10  | 6 | -0.6476016 | 8.29E-30 | 1.51E-25 | 0.758 | 0.988 |
| MDFI    | 6 | -0.6486979 | 1.78E-25 | 3.25E-21 | 0.286 | 0.695 |
| CRTAP   | 6 | -0.6536638 | 9.91E-28 | 1.81E-23 | 0.453 | 0.814 |
| TPM1    | 6 | -0.6580438 | 3.13E-13 | 5.72E-09 | 0.623 | 0.826 |
| DNM3OS  | 6 | -0.6690242 | 4.32E-33 | 7.89E-29 | 0.113 | 0.605 |
| HTRA1   | 6 | -0.6774972 | 4.53E-28 | 8.27E-24 | 0.588 | 0.946 |
| APOD    | 6 | -0.678459  | 6.77E-24 | 1.24E-19 | 0.148 | 0.575 |
| PTRF    | 6 | -0.6794595 | 4.08E-25 | 7.45E-21 | 0.299 | 0.707 |
| ITM2A   | 6 | -0.6797757 | 6.37E-24 | 1.16E-19 | 0.27  | 0.683 |
| RPLP0   | 6 | -0.6798361 | 5.94E-55 | 1.08E-50 | 1     | 1     |
| HSPB1   | 6 | -0.6809621 | 8.30E-22 | 1.52E-17 | 0.553 | 0.856 |
| EIF3L   | 6 | -0.6813112 | 1.35E-32 | 2.47E-28 | 0.654 | 0.916 |
| EIF3H   | 6 | -0.6819145 | 7.18E-37 | 1.31E-32 | 0.934 | 0.994 |
| THY1    | 6 | -0.6826549 | 2.02E-23 | 3.68E-19 | 0.236 | 0.659 |
| YBX1    | 6 | -0.6835783 | 2.65E-37 | 4.83E-33 | 0.962 | 0.994 |
| ID2     | 6 | -0.69517   | 4.30E-17 | 7.85E-13 | 0.39  | 0.707 |
| TSPO    | 6 | -0.7030088 | 2.57E-32 | 4.69E-28 | 0.686 | 0.946 |
| YBX3    | 6 | -0.7064585 | 3.70E-29 | 6.75E-25 | 0.642 | 0.94  |
| RPS11   | 6 | -0.7079202 | 7.94E-50 | 1.45E-45 | 0.991 | 1     |
| RPS20   | 6 | -0.7136477 | 4.11E-51 | 7.49E-47 | 1     | 1     |
| LECT1   | 6 | -0.7225529 | 1.87E-21 | 3.41E-17 | 0.519 | 0.898 |
| PTMS    | 6 | -0.7231762 | 6.64E-32 | 1.21E-27 | 0.469 | 0.886 |
| ITM2C   | 6 | -0.7257356 | 2.68E-27 | 4.90E-23 | 0.286 | 0.731 |
| S100A4  | 6 | -0.7275174 | 8.02E-11 | 1.46E-06 | 0.792 | 0.904 |
| ID1     | 6 | -0.7318846 | 1.58E-16 | 2.88E-12 | 0.415 | 0.76  |
| PRELP   | 6 | -0.7335212 | 5.19E-27 | 9.46E-23 | 0.777 | 0.964 |
| RPL4    | 6 | -0.7376979 | 3.68E-47 | 6.72E-43 | 0.997 | 1     |
| COL9A3  | 6 | -0.7434771 | 5.06E-19 | 9.24E-15 | 0.403 | 0.737 |
| MIA     | 6 | -0.7500958 | 5.14E-31 | 9.39E-27 | 0.95  | 1     |
| GPX3    | 6 | -0.7565635 | 1.17E-28 | 2.14E-24 | 0.858 | 0.994 |
| EEF2    | 6 | -0.7614578 | 3.42E-33 | 6.24E-29 | 0.969 | 1     |
| C2orf40 | 6 | -0.7665712 | 4.86E-22 | 8.87E-18 | 0.965 | 1     |



|         |   |            |          |           |       |       |
|---------|---|------------|----------|-----------|-------|-------|
| MT-CO3  | 6 | -0.7787997 | 3.29E-30 | 6.00E-26  | 0.862 | 0.976 |
| MT-CO1  | 6 | -0.7804137 | 7.29E-25 | 1.33E-20  | 0.969 | 0.988 |
| PDIA6   | 6 | -0.7871584 | 2.00E-34 | 3.66E-30  | 0.472 | 0.898 |
| MT-ND1  | 6 | -0.8140102 | 4.50E-31 | 8.21E-27  | 0.434 | 0.856 |
| DCN     | 6 | -0.8178152 | 2.63E-35 | 4.80E-31  | 1     | 1     |
| MT-ND3  | 6 | -0.8210244 | 6.66E-30 | 1.21E-25  | 0.557 | 0.892 |
| S100B   | 6 | -0.8214566 | 1.43E-29 | 2.61E-25  | 0.506 | 0.856 |
| COL11A1 | 6 | -0.8476201 | 4.16E-31 | 7.60E-27  | 0.437 | 0.91  |
| P4HB    | 6 | -0.849702  | 1.54E-33 | 2.82E-29  | 0.645 | 0.946 |
| PAX1    | 6 | -0.8565322 | 2.79E-33 | 5.09E-29  | 0.365 | 0.826 |
| IGFBP7  | 6 | -0.8570414 | 1.84E-27 | 3.36E-23  | 0.701 | 0.976 |
| EEF1A1  | 6 | -0.879861  | 7.98E-63 | 1.46E-58  | 1     | 1     |
| NGFRAP1 | 6 | -0.8828965 | 1.54E-40 | 2.81E-36  | 0.648 | 0.94  |
| CD99    | 6 | -0.8832873 | 3.00E-42 | 5.48E-38  | 0.789 | 0.994 |
| FBXO2   | 6 | -0.8835375 | 8.48E-39 | 1.55E-34  | 0.418 | 0.88  |
| MT-ND2  | 6 | -0.8972099 | 4.75E-32 | 8.66E-28  | 0.428 | 0.85  |
| ACAN    | 6 | -0.8975202 | 1.34E-34 | 2.45E-30  | 0.77  | 0.976 |
| CST3    | 6 | -0.9076478 | 1.96E-41 | 3.57E-37  | 0.969 | 1     |
| RBP4    | 6 | -0.9156288 | 2.01E-30 | 3.67E-26  | 0.497 | 0.892 |
| CYR61   | 6 | -0.9167716 | 3.15E-28 | 5.75E-24  | 0.198 | 0.677 |
| MT-CYB  | 6 | -0.9307922 | 1.22E-33 | 2.23E-29  | 0.566 | 0.904 |
| PPIC    | 6 | -0.9428715 | 1.47E-39 | 2.68E-35  | 0.186 | 0.743 |
| MT-CO2  | 6 | -0.9605992 | 1.35E-33 | 2.46E-29  | 0.934 | 0.982 |
| ISLR    | 6 | -0.9701938 | 5.78E-44 | 1.06E-39  | 0.167 | 0.754 |
| MT-ATP6 | 6 | -0.9770459 | 7.87E-35 | 1.44E-30  | 0.698 | 0.964 |
| B2M     | 6 | -0.9807483 | 8.96E-52 | 1.63E-47  | 0.972 | 1     |
| ID3     | 6 | -1.0768148 | 4.55E-33 | 8.30E-29  | 0.226 | 0.743 |
| TSC22D1 | 6 | -1.0982949 | 3.35E-22 | 6.11E-18  | 0.66  | 0.904 |
| NEAT1   | 6 | -1.100139  | 4.10E-36 | 7.48E-32  | 0.969 | 0.994 |
| IGFBP6  | 6 | -1.1012989 | 1.57E-33 | 2.86E-29  | 0.484 | 0.916 |
| ADIRF   | 6 | -1.2351996 | 5.93E-43 | 1.08E-38  | 0.333 | 0.892 |
| C2orf82 | 6 | -1.2365579 | 3.23E-36 | 5.90E-32  | 0.921 | 0.988 |
| MSMP    | 6 | -1.2632661 | 8.91E-08 | 0.0016256 | 0.425 | 0.659 |
| SPARC   | 6 | -1.2687518 | 4.86E-49 | 8.88E-45  | 0.321 | 0.94  |
| MGP     | 6 | -1.3277503 | 7.14E-29 | 1.30E-24  | 0.997 | 1     |
| OGN     | 6 | -1.3552551 | 2.24E-38 | 4.09E-34  | 0.777 | 0.97  |
| CAPS    | 6 | -1.3568132 | 6.18E-47 | 1.13E-42  | 0.447 | 0.934 |
| SPTSSB  | 6 | -1.5439648 | 1.58E-59 | 2.89E-55  | 0.006 | 0.671 |
| SLPI    | 6 | -1.5776213 | 1.79E-39 | 3.27E-35  | 0.783 | 0.982 |

|             |                |                  |              |                  |              |              |
|-------------|----------------|------------------|--------------|------------------|--------------|--------------|
| FRZB        | 6              | -1.5949723       | 4.90E-36     | 8.95E-32         | 0.123        | 0.629        |
| PLAC9       | 6              | -1.7172205       | 3.11E-66     | 5.68E-62         | 0.456        | 0.994        |
| CLEC3A      | 6              | -1.8823065       | 1.35E-68     | 2.46E-64         | 0.075        | 0.838        |
| COL2A1      | 6              | -1.9807193       | 2.87E-67     | 5.24E-63         | 0.248        | 0.964        |
| <b>gene</b> | <b>cluster</b> | <b>avg_logFC</b> | <b>p_val</b> | <b>p_val_adj</b> | <b>pct.1</b> | <b>pct.2</b> |
| MT2A        | 7              | 1.72269245       | 1.84E-43     | 3.36E-39         | 1            | 0.967        |
| COL1A1      | 7              | 1.70124395       | 4.12E-34     | 7.52E-30         | 0.72         | 0.203        |
| TGFB1       | 7              | 1.49108451       | 5.01E-54     | 9.15E-50         | 0.952        | 0.439        |
| PRG4        | 7              | 1.32761838       | 6.14E-18     | 1.12E-13         | 0.57         | 0.211        |
| IL11        | 7              | 1.23826226       | 3.34E-20     | 6.10E-16         | 0.357        | 0.028        |
| SPP1        | 7              | 1.22279844       | 5.24E-35     | 9.56E-31         | 0.599        | 0.065        |
| CTHRC1      | 7              | 1.21537295       | 4.32E-35     | 7.88E-31         | 0.831        | 0.423        |
| SOD2        | 7              | 1.1819939        | 3.12E-20     | 5.69E-16         | 0.763        | 0.374        |
| SERPINE2    | 7              | 1.04633559       | 3.53E-31     | 6.44E-27         | 1            | 1            |
| IGFBP3      | 7              | 1.0429048        | 5.87E-22     | 1.07E-17         | 0.821        | 0.459        |
| COL3A1      | 7              | 0.95662565       | 1.90E-15     | 3.46E-11         | 0.816        | 0.614        |
| PGF         | 7              | 0.90818064       | 7.57E-19     | 1.38E-14         | 0.502        | 0.138        |
| ENPP1       | 7              | 0.84033014       | 1.14E-11     | 2.08E-07         | 0.686        | 0.516        |
| POSTN       | 7              | 0.83590696       | 3.94E-13     | 7.19E-09         | 0.319        | 0.061        |
| IGFBP5      | 7              | 0.72075262       | 5.71E-07     | 0.01041161       | 0.57         | 0.382        |
| SOX4        | 7              | 0.71827593       | 1.68E-17     | 3.06E-13         | 0.531        | 0.179        |
| GJA1        | 7              | 0.71266022       | 6.95E-30     | 1.27E-25         | 0.729        | 0.24         |
| CTSL        | 7              | 0.6892608        | 4.41E-08     | 0.00080553       | 0.614        | 0.431        |
| COMP        | 7              | 0.68411957       | 3.12E-09     | 5.69E-05         | 0.729        | 0.524        |
| PMEPA1      | 7              | 0.68116951       | 1.20E-23     | 2.20E-19         | 0.744        | 0.321        |
| TM4SF1      | 7              | 0.67343828       | 2.44E-08     | 0.00044482       | 0.754        | 0.581        |
| TNC         | 7              | 0.66610145       | 2.47E-22     | 4.51E-18         | 0.758        | 0.394        |
| LTBP1       | 7              | 0.65465435       | 8.24E-36     | 1.50E-31         | 0.676        | 0.11         |
| VMP1        | 7              | 0.65354822       | 7.74E-18     | 1.41E-13         | 0.821        | 0.549        |
| H2AFZ       | 7              | 0.64937415       | 2.12E-08     | 0.00038691       | 0.826        | 0.805        |
| MT1X        | 7              | 0.63824637       | 2.87E-09     | 5.23E-05         | 1            | 0.955        |
| VEGFA       | 7              | 0.6092285        | 2.33E-11     | 4.25E-07         | 0.725        | 0.488        |
| PHLDA1      | 7              | 0.60322953       | 9.39E-12     | 1.71E-07         | 0.401        | 0.138        |
| UPP1        | 7              | 0.60137341       | 2.70E-08     | 0.00049248       | 0.391        | 0.191        |
| PTGES       | 7              | 0.59622717       | 6.39E-25     | 1.17E-20         | 0.531        | 0.102        |
| ADAMTS6     | 7              | 0.58688848       | 4.10E-19     | 7.48E-15         | 0.599        | 0.224        |
| RND3        | 7              | 0.57237333       | 3.39E-09     | 6.19E-05         | 0.377        | 0.154        |
| NRP2        | 7              | 0.56982471       | 2.77E-15     | 5.05E-11         | 0.676        | 0.341        |
| TMSB4X      | 7              | 0.56206612       | 4.00E-13     | 7.29E-09         | 0.995        | 0.988        |

|             |   |            |          |            |       |       |
|-------------|---|------------|----------|------------|-------|-------|
| COL1A2      | 7 | 0.5511175  | 2.46E-08 | 0.00044947 | 0.884 | 0.854 |
| TNFSF11     | 7 | 0.49870426 | 6.50E-20 | 1.19E-15   | 0.324 | 0.012 |
| PTGS2       | 7 | 0.4842591  | 1.26E-12 | 2.30E-08   | 0.343 | 0.085 |
| TMSB10      | 7 | 0.47577387 | 8.55E-21 | 1.56E-16   | 1     | 1     |
| CCND1       | 7 | 0.47392107 | 4.59E-13 | 8.38E-09   | 0.671 | 0.411 |
| FN1         | 7 | 0.47143666 | 8.83E-16 | 1.61E-11   | 1     | 0.996 |
| HNRNPH1     | 7 | 0.46907964 | 1.17E-06 | 0.02132686 | 0.671 | 0.488 |
| TNFRSF12A   | 7 | 0.46789941 | 2.23E-14 | 4.08E-10   | 0.865 | 0.577 |
| STK17A      | 7 | 0.46605852 | 2.15E-06 | 0.03917543 | 0.459 | 0.297 |
| CRLF1       | 7 | 0.4521976  | 2.61E-13 | 4.76E-09   | 0.705 | 0.423 |
| PLAUR       | 7 | 0.44679719 | 1.30E-13 | 2.37E-09   | 0.56  | 0.248 |
| GNG11       | 7 | 0.4464057  | 4.78E-10 | 8.72E-06   | 0.71  | 0.537 |
| SPOCK1      | 7 | 0.4357752  | 1.91E-17 | 3.48E-13   | 0.502 | 0.146 |
| AC090498.1  | 7 | 0.42983561 | 4.07E-26 | 7.44E-22   | 1     | 0.996 |
| MMP14       | 7 | 0.42684688 | 1.23E-09 | 2.25E-05   | 0.565 | 0.341 |
| BMP2        | 7 | 0.42565503 | 1.65E-13 | 3.01E-09   | 0.275 | 0.033 |
| MT1G        | 7 | 0.42058218 | 2.22E-06 | 0.04050794 | 0.729 | 0.577 |
| IVNS1ABP    | 7 | 0.41499854 | 1.31E-08 | 0.00023828 | 0.729 | 0.569 |
| MT1E        | 7 | 0.41285635 | 1.11E-07 | 0.00202414 | 0.976 | 0.939 |
| JAG1        | 7 | 0.41008612 | 3.78E-14 | 6.90E-10   | 0.478 | 0.171 |
| PPP1R14B    | 7 | 0.4000285  | 4.82E-07 | 0.00879369 | 0.778 | 0.683 |
| TREM1       | 7 | 0.39897691 | 1.77E-15 | 3.23E-11   | 0.251 | 0.008 |
| MIF         | 7 | 0.39276676 | 3.59E-20 | 6.55E-16   | 1     | 1     |
| MIR4435-2HG | 7 | 0.38779146 | 2.11E-09 | 3.85E-05   | 0.758 | 0.569 |
| FHL2        | 7 | 0.38642497 | 6.02E-08 | 0.0010982  | 0.469 | 0.26  |
| ERO1A       | 7 | 0.38144675 | 1.77E-06 | 0.03238585 | 0.565 | 0.39  |
| LINC00152   | 7 | 0.37722164 | 3.83E-07 | 0.00699285 | 0.778 | 0.687 |
| ACTB        | 7 | 0.37479117 | 3.36E-09 | 6.14E-05   | 0.99  | 0.931 |
| UBE2S       | 7 | 0.3744789  | 9.94E-08 | 0.00181458 | 0.411 | 0.207 |
| ARL4C       | 7 | 0.37158593 | 9.43E-13 | 1.72E-08   | 0.338 | 0.077 |
| APCDD1L     | 7 | 0.35927809 | 2.53E-15 | 4.62E-11   | 0.386 | 0.081 |
| WTAP        | 7 | 0.34960969 | 2.09E-06 | 0.03805353 | 0.604 | 0.455 |
| CYGB        | 7 | 0.34653593 | 1.20E-09 | 2.19E-05   | 0.343 | 0.114 |
| BCL2A1      | 7 | 0.3455193  | 1.06E-07 | 0.00193496 | 0.14  | 0.012 |
| SGIP1       | 7 | 0.33568502 | 7.97E-12 | 1.45E-07   | 0.353 | 0.098 |
| STMN1       | 7 | 0.33438735 | 3.82E-08 | 0.00069794 | 0.44  | 0.207 |
| TFPI2       | 7 | 0.33354311 | 2.60E-07 | 0.00474146 | 0.159 | 0.024 |
| FRMD6       | 7 | 0.32950691 | 1.41E-09 | 2.57E-05   | 0.488 | 0.236 |
| PDE4B       | 7 | 0.32729435 | 6.35E-14 | 1.16E-09   | 0.372 | 0.085 |

|            |   |            |          |            |       |       |
|------------|---|------------|----------|------------|-------|-------|
| MMP2       | 7 | 0.32327302 | 3.46E-10 | 6.32E-06   | 0.15  | 0     |
| MARCKS     | 7 | 0.32093929 | 1.14E-06 | 0.02076214 | 0.512 | 0.301 |
| TFPI       | 7 | 0.31748641 | 1.65E-07 | 0.00301291 | 0.232 | 0.065 |
| SNRPB      | 7 | 0.31150225 | 5.71E-08 | 0.00104277 | 0.58  | 0.382 |
| PSMA7      | 7 | 0.30562099 | 3.05E-08 | 0.00055737 | 0.894 | 0.776 |
| SLC20A1    | 7 | 0.28509073 | 2.32E-06 | 0.04234735 | 0.57  | 0.362 |
| ANPEP      | 7 | 0.28478454 | 2.38E-11 | 4.34E-07   | 0.367 | 0.106 |
| SMIM3      | 7 | 0.2829608  | 3.65E-10 | 6.67E-06   | 0.444 | 0.183 |
| RPL41      | 7 | 0.28167743 | 6.16E-20 | 1.12E-15   | 1     | 1     |
| CXCL8      | 7 | 0.27478092 | 1.31E-06 | 0.02385433 | 0.14  | 0.02  |
| PCSK1      | 7 | 0.26664169 | 1.25E-06 | 0.02285813 | 0.319 | 0.142 |
| FBLN1      | 7 | 0.26620618 | 4.29E-11 | 7.82E-07   | 0.304 | 0.069 |
| EVI2A      | 7 | 0.26422606 | 2.68E-07 | 0.00488754 | 0.271 | 0.093 |
| FGF1       | 7 | 0.26096191 | 4.16E-16 | 7.59E-12   | 0.271 | 0.012 |
| MEDAG      | 7 | 0.26058152 | 1.37E-08 | 0.00025034 | 0.246 | 0.061 |
| CENPW      | 7 | 0.2557055  | 5.20E-07 | 0.00948287 | 0.28  | 0.102 |
| GADD45GIP1 | 7 | 0.25351938 | 4.88E-07 | 0.00890525 | 0.932 | 0.866 |
| HMGA2      | 7 | 0.25236513 | 5.33E-11 | 9.72E-07   | 0.285 | 0.057 |
| YIPF2      | 7 | -0.2504603 | 3.15E-07 | 0.00574062 | 0.396 | 0.622 |
| PRPSAP1    | 7 | -0.2505279 | 8.91E-09 | 0.00016265 | 0.155 | 0.394 |
| C9orf16    | 7 | -0.2510017 | 2.84E-07 | 0.00518986 | 0.512 | 0.715 |
| SMAD9      | 7 | -0.2515984 | 8.11E-10 | 1.48E-05   | 0.097 | 0.337 |
| SHISA4     | 7 | -0.2518792 | 1.91E-06 | 0.03491293 | 0.343 | 0.545 |
| RPS4Y1     | 7 | -0.2525799 | 3.08E-07 | 0.00561436 | 0.87  | 0.955 |
| NDUFA4     | 7 | -0.2529595 | 4.49E-08 | 0.00081857 | 0.932 | 0.967 |
| BTF3       | 7 | -0.2531206 | 1.18E-10 | 2.16E-06   | 0.986 | 0.992 |
| CAPN2      | 7 | -0.2539058 | 2.78E-08 | 0.00050676 | 0.304 | 0.549 |
| COPZ2      | 7 | -0.2549353 | 2.23E-07 | 0.0040601  | 0.575 | 0.785 |
| RPL9       | 7 | -0.2551385 | 1.57E-15 | 2.86E-11   | 1     | 1     |
| PPDPF      | 7 | -0.256933  | 3.79E-12 | 6.92E-08   | 1     | 1     |
| ARL6IP5    | 7 | -0.2572438 | 1.79E-09 | 3.26E-05   | 0.652 | 0.841 |
| GPRC5C     | 7 | -0.2572438 | 2.97E-08 | 0.00054258 | 0.256 | 0.5   |
| SYNGR1     | 7 | -0.2575771 | 1.36E-08 | 0.00024846 | 0.213 | 0.451 |
| HEBP2      | 7 | -0.2577717 | 1.63E-06 | 0.02970901 | 0.676 | 0.841 |
| NPC2       | 7 | -0.2593418 | 1.65E-06 | 0.03003266 | 0.87  | 0.967 |
| SLC25A3    | 7 | -0.2611584 | 6.69E-08 | 0.0012207  | 0.874 | 0.923 |
| EDF1       | 7 | -0.2614257 | 1.95E-09 | 3.55E-05   | 0.928 | 0.98  |
| MRAP2      | 7 | -0.2629895 | 1.50E-13 | 2.74E-09   | 0     | 0.232 |
| RPL7A      | 7 | -0.2641674 | 2.31E-14 | 4.21E-10   | 1     | 1     |

|           |   |            |          |            |       |       |
|-----------|---|------------|----------|------------|-------|-------|
| TCEAL5    | 7 | -0.2653515 | 6.27E-12 | 1.14E-07   | 0.063 | 0.325 |
| MT-ND4    | 7 | -0.2664648 | 9.95E-10 | 1.82E-05   | 0.99  | 0.984 |
| RBM3      | 7 | -0.2665813 | 2.99E-07 | 0.00545423 | 0.768 | 0.87  |
| DBP       | 7 | -0.2667539 | 2.76E-08 | 0.0005034  | 0.111 | 0.325 |
| YBX3      | 7 | -0.2677818 | 1.56E-06 | 0.0284081  | 0.715 | 0.854 |
| VGLL4     | 7 | -0.2683097 | 3.00E-07 | 0.00548048 | 0.396 | 0.61  |
| SND1      | 7 | -0.2694958 | 3.08E-10 | 5.62E-06   | 0.222 | 0.508 |
| KMT2E     | 7 | -0.2698576 | 8.95E-09 | 0.00016325 | 0.411 | 0.679 |
| LINC01420 | 7 | -0.2699298 | 6.17E-08 | 0.0011264  | 0.667 | 0.87  |
| ANXA1     | 7 | -0.2701238 | 6.30E-08 | 0.00114992 | 0.618 | 0.817 |
| CST3      | 7 | -0.2713186 | 9.32E-07 | 0.01699879 | 0.961 | 0.976 |
| RPL31     | 7 | -0.2726177 | 4.15E-15 | 7.58E-11   | 1     | 1     |
| CRTAP     | 7 | -0.2726983 | 1.44E-06 | 0.02631075 | 0.667 | 0.78  |
| RPS9      | 7 | -0.2729092 | 2.11E-17 | 3.86E-13   | 1     | 1     |
| HOOK2     | 7 | -0.2744463 | 1.36E-08 | 0.00024747 | 0.237 | 0.472 |
| RPL5      | 7 | -0.2745539 | 4.44E-12 | 8.10E-08   | 0.995 | 1     |
| SNRPN     | 7 | -0.2764355 | 3.70E-09 | 6.75E-05   | 0.609 | 0.837 |
| SERF2     | 7 | -0.2765072 | 1.66E-10 | 3.04E-06   | 1     | 1     |
| CCSER2    | 7 | -0.2768527 | 6.33E-09 | 0.00011551 | 0.319 | 0.565 |
| MAPK10    | 7 | -0.2769124 | 3.96E-14 | 7.22E-10   | 0.072 | 0.374 |
| CP        | 7 | -0.2769772 | 2.07E-07 | 0.00377403 | 0.145 | 0.358 |
| HOXA10    | 7 | -0.277636  | 3.24E-08 | 0.00059097 | 0.232 | 0.467 |
| AFF3      | 7 | -0.2778038 | 1.36E-08 | 0.00024893 | 0.111 | 0.329 |
| ST13      | 7 | -0.2784629 | 5.30E-08 | 0.00096757 | 0.696 | 0.85  |
| PFN2      | 7 | -0.2800422 | 1.37E-06 | 0.02502055 | 0.599 | 0.756 |
| PIM3      | 7 | -0.2801491 | 1.45E-07 | 0.00264355 | 0.13  | 0.333 |
| N4BP2L2   | 7 | -0.28077   | 1.39E-08 | 0.00025438 | 0.643 | 0.837 |
| OTOS      | 7 | -0.2810017 | 4.51E-11 | 8.22E-07   | 0.058 | 0.301 |
| GSN       | 7 | -0.2811304 | 1.07E-06 | 0.01958698 | 0.386 | 0.573 |
| NR3C1     | 7 | -0.2827795 | 3.25E-07 | 0.00592281 | 0.333 | 0.545 |
| TMEM230   | 7 | -0.2837686 | 6.63E-09 | 0.0001209  | 0.85  | 0.935 |
| DHRS3     | 7 | -0.2845244 | 3.94E-09 | 7.18E-05   | 0.227 | 0.476 |
| KHDRBS3   | 7 | -0.2852204 | 5.78E-09 | 0.00010547 | 0.048 | 0.244 |
| PLXDC2    | 7 | -0.2870856 | 2.98E-07 | 0.00543049 | 0.391 | 0.598 |
| QARS      | 7 | -0.2873037 | 1.21E-10 | 2.21E-06   | 0.266 | 0.561 |
| TALDO1    | 7 | -0.2880596 | 1.31E-06 | 0.02384118 | 0.406 | 0.593 |
| RAMP1     | 7 | -0.2880681 | 7.70E-10 | 1.41E-05   | 0.077 | 0.309 |
| RPL13A    | 7 | -0.2893776 | 4.70E-20 | 8.58E-16   | 1     | 1     |
| HOXC10    | 7 | -0.2904426 | 6.26E-08 | 0.00114279 | 0.469 | 0.687 |

|          |   |            |          |            |       |       |
|----------|---|------------|----------|------------|-------|-------|
| PGM1     | 7 | -0.2908106 | 1.78E-09 | 3.25E-05   | 0.415 | 0.675 |
| SRSF8    | 7 | -0.2914003 | 2.16E-12 | 3.94E-08   | 0.329 | 0.646 |
| CDC42EP5 | 7 | -0.2914003 | 1.21E-10 | 2.21E-06   | 0.324 | 0.63  |
| LDHB     | 7 | -0.293099  | 8.76E-08 | 0.00159788 | 0.671 | 0.793 |
| NKX3-2   | 7 | -0.2935626 | 6.02E-10 | 1.10E-05   | 0.097 | 0.337 |
| AP2M1    | 7 | -0.2939682 | 1.77E-08 | 0.00032252 | 0.715 | 0.846 |
| ATP5A1   | 7 | -0.2945779 | 1.25E-08 | 0.00022879 | 0.507 | 0.72  |
| UGP2     | 7 | -0.2946918 | 5.97E-08 | 0.00109015 | 0.502 | 0.74  |
| MPC2     | 7 | -0.2947628 | 1.18E-08 | 0.00021451 | 0.589 | 0.785 |
| ERP29    | 7 | -0.2950947 | 5.60E-08 | 0.00102139 | 0.671 | 0.809 |
| CKAP4    | 7 | -0.296691  | 8.29E-08 | 0.00151327 | 0.691 | 0.841 |
| TIMP4    | 7 | -0.2973909 | 4.10E-10 | 7.47E-06   | 0.135 | 0.386 |
| GARS     | 7 | -0.2978487 | 8.53E-07 | 0.01556621 | 0.28  | 0.484 |
| MKX      | 7 | -0.2978753 | 7.06E-08 | 0.00128767 | 0.213 | 0.439 |
| PERP     | 7 | -0.299823  | 1.11E-08 | 0.00020309 | 0.372 | 0.614 |
| PRR7     | 7 | -0.3032659 | 1.10E-07 | 0.0020138  | 0.353 | 0.565 |
| EIF3F    | 7 | -0.3035532 | 1.69E-09 | 3.08E-05   | 0.778 | 0.927 |
| TENM3    | 7 | -0.3036784 | 6.90E-15 | 1.26E-10   | 0.053 | 0.354 |
| HNRNPA1  | 7 | -0.3039854 | 2.99E-07 | 0.00545151 | 0.986 | 0.98  |
| C1orf21  | 7 | -0.3042065 | 4.83E-08 | 0.0008814  | 0.478 | 0.679 |
| SSR2     | 7 | -0.304229  | 2.01E-11 | 3.68E-07   | 0.957 | 0.963 |
| AGR2     | 7 | -0.3047836 | 2.19E-07 | 0.0039988  | 0.039 | 0.199 |
| SCIN     | 7 | -0.3052649 | 8.80E-09 | 0.00016051 | 0.198 | 0.435 |
| RPS4X    | 7 | -0.306072  | 2.15E-17 | 3.93E-13   | 1     | 1     |
| BEX4     | 7 | -0.3061945 | 3.10E-09 | 5.66E-05   | 0.338 | 0.622 |
| APLN     | 7 | -0.3069603 | 3.19E-07 | 0.00581679 | 0.058 | 0.228 |
| PEBP1    | 7 | -0.3107197 | 4.17E-10 | 7.61E-06   | 0.725 | 0.886 |
| NENF     | 7 | -0.3113656 | 2.49E-13 | 4.55E-09   | 0.899 | 0.967 |
| RHOA     | 7 | -0.3114581 | 7.45E-11 | 1.36E-06   | 0.903 | 0.963 |
| CYBRD1   | 7 | -0.314131  | 4.11E-09 | 7.50E-05   | 0.396 | 0.634 |
| SPON2    | 7 | -0.3146287 | 4.53E-09 | 8.27E-05   | 0.155 | 0.411 |
| TCEAL8   | 7 | -0.3153111 | 1.32E-08 | 0.00024104 | 0.691 | 0.882 |
| RPL23    | 7 | -0.3156811 | 1.05E-19 | 1.92E-15   | 0.995 | 1     |
| FOS      | 7 | -0.3160513 | 2.07E-07 | 0.00378006 | 0.213 | 0.447 |
| TMEM258  | 7 | -0.3173263 | 1.36E-14 | 2.49E-10   | 0.981 | 0.996 |
| RPS8     | 7 | -0.3174334 | 4.11E-25 | 7.51E-21   | 1     | 1     |
| MAP7D3   | 7 | -0.3176756 | 1.04E-06 | 0.01902012 | 0.377 | 0.569 |
| TPM2     | 7 | -0.320282  | 1.81E-06 | 0.0330377  | 0.87  | 0.923 |
| PAPSS2   | 7 | -0.3209596 | 3.81E-08 | 0.000696   | 0.353 | 0.585 |

|              |   |            |          |            |       |       |
|--------------|---|------------|----------|------------|-------|-------|
| CTSD         | 7 | -0.3212498 | 4.16E-08 | 0.00075957 | 0.758 | 0.874 |
| PDLIM2       | 7 | -0.3213729 | 7.10E-10 | 1.30E-05   | 0.778 | 0.878 |
| CKB          | 7 | -0.3216836 | 2.56E-09 | 4.67E-05   | 0.135 | 0.378 |
| OSBPL9       | 7 | -0.3217999 | 3.46E-07 | 0.00630641 | 0.217 | 0.419 |
| LPP          | 7 | -0.3221679 | 7.56E-10 | 1.38E-05   | 0.324 | 0.585 |
| ARHGAP29     | 7 | -0.3232364 | 1.17E-07 | 0.00213041 | 0.338 | 0.561 |
| LPIN1        | 7 | -0.3262264 | 8.36E-13 | 1.53E-08   | 0.13  | 0.427 |
| EIF4B        | 7 | -0.3272151 | 2.11E-10 | 3.84E-06   | 0.551 | 0.776 |
| COMMD6       | 7 | -0.3285546 | 4.69E-17 | 8.56E-13   | 0.971 | 1     |
| RPS3A        | 7 | -0.329202  | 3.15E-24 | 5.74E-20   | 1     | 1     |
| CLU          | 7 | -0.3295852 | 3.27E-11 | 5.96E-07   | 0.87  | 0.992 |
| RCN1         | 7 | -0.3308464 | 6.35E-09 | 0.00011583 | 0.449 | 0.65  |
| RPLP0        | 7 | -0.3311445 | 1.84E-27 | 3.36E-23   | 1     | 1     |
| MMP24-AS1    | 7 | -0.3314246 | 3.99E-10 | 7.27E-06   | 0.667 | 0.866 |
| RPL10A       | 7 | -0.3330355 | 9.03E-21 | 1.65E-16   | 1     | 1     |
| TNS2         | 7 | -0.3338932 | 2.53E-14 | 4.61E-10   | 0.111 | 0.431 |
| HDLBP        | 7 | -0.3340549 | 6.67E-11 | 1.22E-06   | 0.725 | 0.902 |
| DAP          | 7 | -0.3373429 | 2.40E-11 | 4.38E-07   | 0.652 | 0.886 |
| NFIC         | 7 | -0.3377455 | 3.02E-10 | 5.51E-06   | 0.589 | 0.833 |
| HSP90AB1     | 7 | -0.33937   | 6.93E-10 | 1.27E-05   | 0.807 | 0.955 |
| TSC22D4      | 7 | -0.3396988 | 7.39E-13 | 1.35E-08   | 0.261 | 0.581 |
| SH3BGRL      | 7 | -0.3406669 | 6.23E-10 | 1.14E-05   | 0.599 | 0.805 |
| TCF4         | 7 | -0.3414596 | 6.09E-09 | 0.00011109 | 0.517 | 0.736 |
| PLCD3        | 7 | -0.3426672 | 8.36E-17 | 1.53E-12   | 0.082 | 0.427 |
| RPL30        | 7 | -0.3440253 | 3.49E-24 | 6.37E-20   | 1     | 1     |
| TSPAN4       | 7 | -0.3443953 | 8.38E-10 | 1.53E-05   | 0.527 | 0.76  |
| ERGIC3       | 7 | -0.3451654 | 4.19E-10 | 7.65E-06   | 0.754 | 0.866 |
| GPX3         | 7 | -0.3467417 | 2.82E-07 | 0.00515306 | 0.831 | 0.955 |
| ATRNL1       | 7 | -0.3467966 | 3.45E-14 | 6.29E-10   | 0.106 | 0.423 |
| DDR2         | 7 | -0.3474991 | 3.96E-10 | 7.23E-06   | 0.469 | 0.699 |
| TUBB2B       | 7 | -0.3490489 | 5.18E-08 | 0.00094443 | 0.169 | 0.398 |
| CMB9-22P13.1 | 7 | -0.3491914 | 6.84E-09 | 0.00012476 | 0.386 | 0.614 |
| RPL18        | 7 | -0.349294  | 1.34E-25 | 2.44E-21   | 1     | 1     |
| NDUFA4L2     | 7 | -0.3528543 | 8.29E-13 | 1.51E-08   | 0.986 | 1     |
| C19orf60     | 7 | -0.3531015 | 2.71E-12 | 4.94E-08   | 0.517 | 0.789 |
| SRP14        | 7 | -0.3545046 | 4.37E-15 | 7.97E-11   | 0.976 | 0.996 |
| SMIM14       | 7 | -0.3553165 | 8.17E-11 | 1.49E-06   | 0.536 | 0.764 |
| MALL         | 7 | -0.3574948 | 3.87E-07 | 0.00706531 | 0.585 | 0.76  |
| CSDE1        | 7 | -0.3577257 | 1.47E-13 | 2.68E-09   | 0.638 | 0.878 |

|          |   |            |          |            |       |       |
|----------|---|------------|----------|------------|-------|-------|
| ACTG1    | 7 | -0.3597965 | 1.31E-07 | 0.00239612 | 0.932 | 0.98  |
| TTC3     | 7 | -0.3623488 | 9.12E-12 | 1.66E-07   | 0.845 | 0.976 |
| FXVD6    | 7 | -0.3655973 | 4.51E-12 | 8.22E-08   | 0.816 | 0.959 |
| LITAF    | 7 | -0.3656119 | 1.16E-12 | 2.11E-08   | 0.425 | 0.72  |
| SERPINA5 | 7 | -0.3658963 | 2.15E-07 | 0.00393096 | 0.415 | 0.614 |
| VCAN     | 7 | -0.3670333 | 1.70E-07 | 0.00310434 | 0.681 | 0.837 |
| TMED10   | 7 | -0.3752727 | 4.05E-13 | 7.39E-09   | 0.797 | 0.959 |
| GNB2L1   | 7 | -0.375962  | 1.33E-15 | 2.43E-11   | 0.99  | 1     |
| SLC14A1  | 7 | -0.3779203 | 8.52E-15 | 1.56E-10   | 0.121 | 0.451 |
| AHNAK    | 7 | -0.3784598 | 1.61E-12 | 2.93E-08   | 0.691 | 0.898 |
| FTH1     | 7 | -0.3801504 | 1.16E-26 | 2.12E-22   | 1     | 1     |
| COL5A2   | 7 | -0.3805859 | 2.91E-08 | 0.00053049 | 0.865 | 0.972 |
| HSPB6    | 7 | -0.3807725 | 5.44E-12 | 9.92E-08   | 0.242 | 0.545 |
| PPP1R3C  | 7 | -0.381698  | 9.14E-08 | 0.00166814 | 0.353 | 0.589 |
| CRISPLD1 | 7 | -0.3817947 | 7.01E-07 | 0.01278367 | 0.063 | 0.224 |
| DDIT4    | 7 | -0.3831506 | 1.67E-08 | 0.0003054  | 0.415 | 0.679 |
| VAMP5    | 7 | -0.3873819 | 7.58E-13 | 1.38E-08   | 0.556 | 0.793 |
| KAZALD1  | 7 | -0.3920721 | 4.54E-15 | 8.28E-11   | 0.193 | 0.537 |
| ITGA11   | 7 | -0.3934982 | 1.48E-11 | 2.70E-07   | 0.304 | 0.581 |
| AOC2     | 7 | -0.3947651 | 3.08E-13 | 5.62E-09   | 0.063 | 0.337 |
| MEF2C    | 7 | -0.395892  | 9.46E-11 | 1.73E-06   | 0.193 | 0.459 |
| DNAJC22  | 7 | -0.3959717 | 2.14E-09 | 3.90E-05   | 0.068 | 0.28  |
| SIX1     | 7 | -0.3982449 | 1.24E-11 | 2.26E-07   | 0.246 | 0.549 |
| PKM      | 7 | -0.3995558 | 4.64E-12 | 8.47E-08   | 0.947 | 0.988 |
| HSPA8    | 7 | -0.4025915 | 4.04E-10 | 7.37E-06   | 0.517 | 0.74  |
| MAGED1   | 7 | -0.403518  | 2.63E-10 | 4.79E-06   | 0.425 | 0.687 |
| TSC22D3  | 7 | -0.4057589 | 1.71E-11 | 3.12E-07   | 0.174 | 0.451 |
| NFIA     | 7 | -0.4064211 | 1.27E-13 | 2.31E-09   | 0.372 | 0.663 |
| RPL3     | 7 | -0.4072275 | 1.39E-24 | 2.53E-20   | 1     | 1     |
| ID3      | 7 | -0.4091264 | 1.11E-06 | 0.02025896 | 0.739 | 0.911 |
| PNISR    | 7 | -0.4104167 | 1.23E-15 | 2.24E-11   | 0.623 | 0.866 |
| TKT      | 7 | -0.4107948 | 1.50E-09 | 2.73E-05   | 0.444 | 0.703 |
| ID4      | 7 | -0.410802  | 1.36E-07 | 0.00248145 | 0.512 | 0.728 |
| C1QTNF8  | 7 | -0.4142197 | 1.41E-18 | 2.57E-14   | 0.116 | 0.496 |
| GPC6     | 7 | -0.4165239 | 4.08E-16 | 7.45E-12   | 0.415 | 0.756 |
| TBL1XR1  | 7 | -0.4178442 | 1.16E-07 | 0.00212336 | 0.522 | 0.699 |
| CRYAB    | 7 | -0.4191916 | 1.08E-12 | 1.97E-08   | 0.787 | 0.923 |
| CD68     | 7 | -0.422896  | 5.75E-13 | 1.05E-08   | 0.488 | 0.772 |
| RSPO2    | 7 | -0.4276024 | 2.86E-11 | 5.22E-07   | 0.101 | 0.362 |



|           |   |            |          |           |       |       |
|-----------|---|------------|----------|-----------|-------|-------|
| FAM46A    | 7 | -0.4304626 | 5.27E-09 | 9.62E-05  | 0.599 | 0.785 |
| P4HB      | 7 | -0.4305927 | 2.60E-11 | 4.75E-07  | 0.928 | 0.984 |
| CCDC102B  | 7 | -0.4376468 | 9.37E-20 | 1.71E-15  | 0.058 | 0.431 |
| B3GNT7    | 7 | -0.4380134 | 5.16E-07 | 0.0094088 | 0.275 | 0.484 |
| RPL4      | 7 | -0.4382423 | 1.52E-28 | 2.77E-24  | 0.99  | 1     |
| CXXC5     | 7 | -0.4418349 | 7.59E-14 | 1.39E-09  | 0.58  | 0.829 |
| LINC01503 | 7 | -0.4455714 | 6.73E-11 | 1.23E-06  | 0.271 | 0.533 |
| DMKN      | 7 | -0.4464265 | 4.07E-18 | 7.43E-14  | 0.155 | 0.541 |
| DNM3OS    | 7 | -0.4482739 | 5.32E-11 | 9.70E-07  | 0.58  | 0.768 |
| DSTN      | 7 | -0.4498884 | 4.77E-22 | 8.71E-18  | 1     | 1     |
| TPT1      | 7 | -0.4512573 | 1.50E-33 | 2.73E-29  | 1     | 1     |
| NPDC1     | 7 | -0.4567924 | 6.34E-19 | 1.16E-14  | 0.169 | 0.565 |
| ENAH      | 7 | -0.4572854 | 2.90E-18 | 5.28E-14  | 0.406 | 0.752 |
| SMIM5     | 7 | -0.4574505 | 4.61E-18 | 8.41E-14  | 0.092 | 0.459 |
| SLC38A1   | 7 | -0.4580771 | 4.45E-21 | 8.13E-17  | 0.213 | 0.638 |
| HRCT1     | 7 | -0.4613715 | 2.11E-10 | 3.85E-06  | 0.116 | 0.366 |
| ZBTB20    | 7 | -0.4640442 | 4.81E-20 | 8.78E-16  | 0.246 | 0.638 |
| GAPDH     | 7 | -0.4722883 | 3.61E-21 | 6.60E-17  | 1     | 1     |
| S100A4    | 7 | -0.475819  | 6.59E-12 | 1.20E-07  | 0.971 | 0.988 |
| RPL7      | 7 | -0.4786017 | 2.37E-32 | 4.32E-28  | 1     | 1     |
| S100A6    | 7 | -0.4797065 | 9.97E-17 | 1.82E-12  | 1     | 1     |
| CRIP2     | 7 | -0.4844384 | 5.34E-15 | 9.75E-11  | 0.575 | 0.841 |
| MOXD1     | 7 | -0.4856877 | 2.07E-21 | 3.79E-17  | 0.053 | 0.447 |
| HIST1H1C  | 7 | -0.486776  | 2.51E-12 | 4.58E-08  | 0.15  | 0.439 |
| PTRF      | 7 | -0.4882736 | 1.69E-17 | 3.09E-13  | 0.744 | 0.919 |
| AHNAK2    | 7 | -0.4882736 | 5.71E-16 | 1.04E-11  | 0.184 | 0.533 |
| METRNL    | 7 | -0.4899866 | 4.85E-17 | 8.85E-13  | 0.44  | 0.78  |
| S100A13   | 7 | -0.4912187 | 4.76E-23 | 8.68E-19  | 0.986 | 1     |
| MT-CO1    | 7 | -0.4925959 | 6.19E-21 | 1.13E-16  | 1     | 0.984 |
| NINJ1     | 7 | -0.4929465 | 1.66E-17 | 3.04E-13  | 0.242 | 0.638 |
| MT-CO3    | 7 | -0.494933  | 8.91E-24 | 1.63E-19  | 0.976 | 0.98  |
| SEPP1     | 7 | -0.4976501 | 1.31E-20 | 2.38E-16  | 0.053 | 0.439 |
| MT-ATP6   | 7 | -0.5010322 | 3.49E-21 | 6.36E-17  | 0.952 | 0.984 |
| LECT1     | 7 | -0.5024155 | 4.30E-10 | 7.85E-06  | 0.348 | 0.626 |
| OAF       | 7 | -0.505476  | 1.24E-19 | 2.26E-15  | 0.488 | 0.821 |
| MT-ND1    | 7 | -0.5055865 | 2.96E-17 | 5.40E-13  | 0.87  | 0.963 |
| EIF3L     | 7 | -0.5080861 | 1.74E-19 | 3.17E-15  | 0.705 | 0.886 |
| LOXL1     | 7 | -0.5082212 | 3.16E-13 | 5.77E-09  | 0.309 | 0.606 |
| LIMCH1    | 7 | -0.5105243 | 1.42E-14 | 2.59E-10  | 0.188 | 0.504 |

|         |   |            |          |            |       |       |
|---------|---|------------|----------|------------|-------|-------|
| PNRC1   | 7 | -0.5111093 | 3.91E-16 | 7.13E-12   | 0.662 | 0.894 |
| SDC2    | 7 | -0.5155291 | 1.17E-18 | 2.13E-14   | 0.816 | 0.967 |
| C6orf48 | 7 | -0.517098  | 3.69E-13 | 6.73E-09   | 0.758 | 0.923 |
| SCRG1   | 7 | -0.5176672 | 6.20E-08 | 0.00113188 | 0.942 | 0.967 |
| COL14A1 | 7 | -0.5183676 | 2.01E-13 | 3.67E-09   | 0.097 | 0.39  |
| FRZB    | 7 | -0.5183954 | 4.55E-10 | 8.30E-06   | 0.077 | 0.305 |
| FXYD1   | 7 | -0.5184832 | 1.66E-16 | 3.03E-12   | 0.155 | 0.508 |
| CCDC80  | 7 | -0.5205344 | 1.07E-07 | 0.00195769 | 0.831 | 0.931 |
| RHOBTB3 | 7 | -0.5263824 | 2.18E-16 | 3.98E-12   | 0.469 | 0.764 |
| PRSS23  | 7 | -0.5279037 | 1.37E-06 | 0.02508817 | 0.768 | 0.833 |
| RPS20   | 7 | -0.5298829 | 2.22E-38 | 4.05E-34   | 1     | 1     |
| B2M     | 7 | -0.5333179 | 5.52E-27 | 1.01E-22   | 0.99  | 1     |
| DCN     | 7 | -0.5339575 | 6.41E-17 | 1.17E-12   | 0.942 | 0.996 |
| TPM1    | 7 | -0.5371942 | 1.43E-12 | 2.60E-08   | 0.865 | 0.972 |
| HCFC1R1 | 7 | -0.5392048 | 4.90E-19 | 8.93E-15   | 0.841 | 0.976 |
| SNAI2   | 7 | -0.5413324 | 6.34E-11 | 1.16E-06   | 0.715 | 0.85  |
| DAB2    | 7 | -0.5455174 | 2.26E-18 | 4.12E-14   | 0.425 | 0.776 |
| ZFP36L2 | 7 | -0.5462593 | 8.28E-08 | 0.00151024 | 0.319 | 0.533 |
| PDE4DIP | 7 | -0.5480339 | 1.87E-23 | 3.42E-19   | 0.242 | 0.683 |
| SPTLC3  | 7 | -0.5485475 | 2.57E-16 | 4.70E-12   | 0.203 | 0.557 |
| RPS11   | 7 | -0.5566394 | 3.76E-46 | 6.86E-42   | 1     | 1     |
| COL11A1 | 7 | -0.5596318 | 3.06E-12 | 5.59E-08   | 0.836 | 0.959 |
| MIA     | 7 | -0.5603439 | 3.31E-16 | 6.04E-12   | 0.739 | 0.927 |
| PLPP1   | 7 | -0.5646298 | 1.76E-17 | 3.21E-13   | 0.159 | 0.524 |
| ISM1    | 7 | -0.565385  | 6.39E-23 | 1.17E-18   | 0.053 | 0.463 |
| SOX9    | 7 | -0.5690934 | 3.24E-18 | 5.91E-14   | 0.498 | 0.833 |
| ITM2C   | 7 | -0.5699679 | 4.35E-18 | 7.95E-14   | 0.599 | 0.846 |
| SPTSSB  | 7 | -0.5700145 | 1.03E-15 | 1.88E-11   | 0     | 0.268 |
| CHI3L1  | 7 | -0.5714045 | 9.09E-10 | 1.66E-05   | 0.454 | 0.736 |
| MT-ND3  | 7 | -0.5722557 | 8.39E-30 | 1.53E-25   | 0.894 | 0.972 |
| MT-ND2  | 7 | -0.5735589 | 3.52E-24 | 6.43E-20   | 0.845 | 0.967 |
| MFGE8   | 7 | -0.5758752 | 8.57E-17 | 1.56E-12   | 0.517 | 0.797 |
| THY1    | 7 | -0.580819  | 2.25E-14 | 4.11E-10   | 0.85  | 0.976 |
| TPD52L1 | 7 | -0.5885129 | 6.19E-25 | 1.13E-20   | 0.237 | 0.691 |
| NGFRAP1 | 7 | -0.5905725 | 6.97E-25 | 1.27E-20   | 0.85  | 0.976 |
| ISLR    | 7 | -0.6034372 | 2.98E-22 | 5.43E-18   | 0.512 | 0.821 |
| MT-CYB  | 7 | -0.6035037 | 7.14E-25 | 1.30E-20   | 0.894 | 0.98  |
| COL11A2 | 7 | -0.6059886 | 1.33E-17 | 2.44E-13   | 0.126 | 0.488 |
| WWP2    | 7 | -0.6278268 | 2.11E-19 | 3.86E-15   | 0.43  | 0.776 |

|         |   |            |          |          |       |       |
|---------|---|------------|----------|----------|-------|-------|
| MYLK    | 7 | -0.6326812 | 3.14E-19 | 5.73E-15 | 0.193 | 0.573 |
| SOD3    | 7 | -0.6337505 | 1.41E-17 | 2.58E-13 | 0.541 | 0.878 |
| MALAT1  | 7 | -0.6357287 | 1.99E-33 | 3.63E-29 | 1     | 1     |
| PAX1    | 7 | -0.6390045 | 1.19E-19 | 2.18E-15 | 0.643 | 0.894 |
| CYR61   | 7 | -0.639161  | 1.78E-07 | 0.003256 | 0.614 | 0.752 |
| COL9A3  | 7 | -0.6425377 | 1.19E-10 | 2.18E-06 | 0.275 | 0.512 |
| S100A10 | 7 | -0.6434171 | 8.80E-27 | 1.61E-22 | 1     | 1     |
| GREM1   | 7 | -0.6619461 | 4.06E-09 | 7.41E-05 | 0.063 | 0.268 |
| MEG3    | 7 | -0.7039969 | 8.02E-15 | 1.46E-10 | 0.44  | 0.683 |
| FTL     | 7 | -0.7086002 | 1.10E-41 | 2.01E-37 | 1     | 1     |
| NUPR1   | 7 | -0.7225764 | 5.51E-16 | 1.01E-11 | 0.749 | 0.935 |
| EIF3H   | 7 | -0.7366416 | 9.07E-31 | 1.65E-26 | 0.749 | 0.947 |
| HAPLN1  | 7 | -0.7562568 | 5.17E-15 | 9.44E-11 | 0.522 | 0.789 |
| NOVA1   | 7 | -0.760258  | 1.29E-11 | 2.35E-07 | 0.377 | 0.614 |
| IGFBP6  | 7 | -0.7665718 | 1.38E-29 | 2.52E-25 | 0.647 | 0.919 |
| EEF1A1  | 7 | -0.8043419 | 4.62E-50 | 8.42E-46 | 1     | 1     |
| CITED2  | 7 | -0.8176871 | 1.24E-20 | 2.26E-16 | 0.266 | 0.646 |
| ID2     | 7 | -0.8497162 | 2.80E-19 | 5.12E-15 | 0.594 | 0.841 |
| ID1     | 7 | -0.856571  | 2.13E-18 | 3.89E-14 | 0.763 | 0.955 |
| FGFBP2  | 7 | -0.8583893 | 1.05E-15 | 1.92E-11 | 0.43  | 0.699 |
| PLAC9   | 7 | -0.8615236 | 4.12E-35 | 7.52E-31 | 0.734 | 0.976 |
| FHL1    | 7 | -0.8649119 | 3.75E-29 | 6.84E-25 | 0.261 | 0.732 |
| TSC22D1 | 7 | -0.8784208 | 5.86E-22 | 1.07E-17 | 0.56  | 0.882 |
| OGN     | 7 | -0.9052004 | 4.13E-20 | 7.54E-16 | 0.473 | 0.825 |
| EEF2    | 7 | -0.9283671 | 1.17E-37 | 2.13E-33 | 0.894 | 0.976 |
| FBXO2   | 7 | -0.9306345 | 1.05E-31 | 1.91E-27 | 0.309 | 0.772 |
| S100B   | 7 | -0.9400103 | 5.27E-28 | 9.62E-24 | 0.386 | 0.825 |
| VIM     | 7 | -0.9400161 | 1.09E-25 | 1.99E-21 | 1     | 1     |
| NEAT1   | 7 | -0.9490675 | 1.17E-40 | 2.13E-36 | 1     | 1     |
| CLEC3A  | 7 | -0.9802986 | 6.51E-23 | 1.19E-18 | 0.068 | 0.484 |
| C2orf40 | 7 | -0.9924035 | 1.53E-20 | 2.78E-16 | 0.618 | 0.85  |
| CTGF    | 7 | -1.1409723 | 7.65E-10 | 1.40E-05 | 0.604 | 0.797 |
| ACAN    | 7 | -1.2210077 | 2.25E-40 | 4.10E-36 | 0.705 | 0.967 |
| S100A1  | 7 | -1.3273355 | 1.00E-47 | 1.83E-43 | 0.787 | 0.976 |
| ADIRF   | 7 | -1.3657137 | 8.57E-38 | 1.56E-33 | 0.372 | 0.862 |
| MGP     | 7 | -1.3806844 | 5.32E-35 | 9.71E-31 | 0.923 | 1     |
| CAPS    | 7 | -1.4188485 | 1.27E-49 | 2.32E-45 | 0.353 | 0.923 |
| C2orf82 | 7 | -1.5195248 | 4.50E-31 | 8.21E-27 | 0.662 | 0.919 |
| SLPI    | 7 | -1.6363984 | 1.78E-41 | 3.25E-37 | 0.444 | 0.931 |

|             |                |                  |              |                  |              |              |
|-------------|----------------|------------------|--------------|------------------|--------------|--------------|
| COL2A1      | 7              | -1.7319334       | 1.95E-37     | 3.56E-33         | 0.425        | 0.907        |
| MSMP        | 7              | -1.9292835       | 2.11E-29     | 3.86E-25         | 0.169        | 0.683        |
| <b>gene</b> | <b>cluster</b> | <b>avg_logFC</b> | <b>p_val</b> | <b>p_val_adj</b> | <b>pct.1</b> | <b>pct.2</b> |
| MT2A        | 8              | 2.14090465       | 5.30E-33     | 9.68E-29         | 1            | 0.97         |
| SPP1        | 8              | 2.0048262        | 1.72E-46     | 3.13E-42         | 0.805        | 0.045        |
| FN1         | 8              | 1.75653579       | 9.66E-37     | 1.76E-32         | 1            | 0.985        |
| TGFBI       | 8              | 1.42944845       | 4.99E-33     | 9.11E-29         | 0.805        | 0.174        |
| SOD2        | 8              | 1.20016016       | 2.74E-21     | 5.00E-17         | 0.963        | 0.617        |
| CTHRC1      | 8              | 1.13897545       | 4.66E-27     | 8.50E-23         | 0.659        | 0.117        |
| S100A2      | 8              | 1.10532605       | 3.96E-08     | 0.00072319       | 0.573        | 0.299        |
| COL1A2      | 8              | 1.08145424       | 3.32E-11     | 6.05E-07         | 0.659        | 0.386        |
| MT1G        | 8              | 1.04792749       | 5.32E-08     | 0.00097124       | 0.927        | 0.826        |
| PRG4        | 8              | 1.04630302       | 3.45E-33     | 6.29E-29         | 0.537        | 0.015        |
| IGFBP3      | 8              | 1.00615757       | 8.50E-15     | 1.55E-10         | 0.488        | 0.106        |
| SERPINE2    | 8              | 0.96935943       | 1.09E-17     | 1.99E-13         | 1            | 0.996        |
| ADAMTS6     | 8              | 0.95038739       | 9.72E-25     | 1.77E-20         | 0.585        | 0.091        |
| AEBP1       | 8              | 0.94339451       | 3.09E-17     | 5.64E-13         | 0.805        | 0.428        |
| VEGFA       | 8              | 0.85604002       | 9.19E-14     | 1.68E-09         | 0.793        | 0.42         |
| MT1X        | 8              | 0.83608541       | 3.74E-10     | 6.82E-06         | 0.988        | 0.985        |
| SLC25A37    | 8              | 0.82203366       | 6.08E-18     | 1.11E-13         | 0.878        | 0.504        |
| MT1E        | 8              | 0.803218         | 1.28E-08     | 0.00023377       | 0.988        | 0.939        |
| IL11        | 8              | 0.77128358       | 4.20E-13     | 7.66E-09         | 0.207        | 0.004        |
| TMSB10      | 8              | 0.76186661       | 4.01E-17     | 7.31E-13         | 1            | 0.977        |
| HMGA1       | 8              | 0.75446236       | 1.59E-07     | 0.0029014        | 0.402        | 0.159        |
| TNFRSF12A   | 8              | 0.73097492       | 6.12E-09     | 0.00011176       | 0.537        | 0.269        |
| BMP2        | 8              | 0.72781007       | 5.62E-26     | 1.02E-21         | 0.451        | 0.019        |
| PTGS2       | 8              | 0.71116876       | 1.97E-21     | 3.60E-17         | 0.5          | 0.064        |
| CTSL        | 8              | 0.70590246       | 1.59E-06     | 0.02902062       | 0.585        | 0.383        |
| LTBP1       | 8              | 0.70220685       | 2.74E-31     | 4.99E-27         | 0.512        | 0.015        |
| PPP3CA      | 8              | 0.70013905       | 2.65E-12     | 4.84E-08         | 0.915        | 0.625        |
| ABI3BP      | 8              | 0.69626619       | 1.21E-10     | 2.21E-06         | 0.707        | 0.364        |
| BAALC       | 8              | 0.69302145       | 3.06E-14     | 5.58E-10         | 0.707        | 0.318        |
| CRLF1       | 8              | 0.69230578       | 2.02E-17     | 3.69E-13         | 0.61         | 0.163        |
| TMSB4X      | 8              | 0.6751539        | 1.96E-08     | 0.00035708       | 0.915        | 0.777        |
| MT1M        | 8              | 0.61879509       | 5.44E-09     | 9.93E-05         | 0.732        | 0.5          |
| CTNNB1      | 8              | 0.61085708       | 4.76E-09     | 8.69E-05         | 0.61         | 0.311        |
| BTG1        | 8              | 0.60639086       | 1.70E-11     | 3.11E-07         | 0.988        | 0.879        |
| NRP2        | 8              | 0.59424229       | 6.62E-19     | 1.21E-14         | 0.537        | 0.098        |
| WTAP        | 8              | 0.59074558       | 2.88E-09     | 5.26E-05         | 0.695        | 0.405        |

|           |   |            |          |            |       |       |
|-----------|---|------------|----------|------------|-------|-------|
| CCND1     | 8 | 0.58551652 | 3.94E-11 | 7.19E-07   | 0.402 | 0.102 |
| SLC5A3    | 8 | 0.56582896 | 2.00E-09 | 3.65E-05   | 0.695 | 0.367 |
| SLC20A1   | 8 | 0.56474831 | 3.20E-10 | 5.84E-06   | 0.402 | 0.114 |
| TNC       | 8 | 0.56064006 | 3.49E-25 | 6.36E-21   | 0.476 | 0.03  |
| S100A16   | 8 | 0.5554677  | 3.50E-11 | 6.39E-07   | 0.598 | 0.239 |
| UPP1      | 8 | 0.5439601  | 6.49E-09 | 0.00011844 | 0.39  | 0.121 |
| STK17A    | 8 | 0.54104057 | 2.64E-11 | 4.81E-07   | 0.415 | 0.106 |
| TM4SF1    | 8 | 0.53719066 | 4.01E-07 | 0.00732175 | 0.549 | 0.292 |
| MIF       | 8 | 0.53097094 | 1.66E-17 | 3.02E-13   | 1     | 1     |
| CD44      | 8 | 0.52224472 | 6.61E-11 | 1.21E-06   | 0.854 | 0.47  |
| COMP      | 8 | 0.50268642 | 5.23E-07 | 0.00953972 | 0.902 | 0.689 |
| BZW1      | 8 | 0.50116951 | 4.17E-08 | 0.00076132 | 0.707 | 0.443 |
| PHLDA1    | 8 | 0.49806158 | 1.87E-17 | 3.42E-13   | 0.305 | 0.011 |
| LOX       | 8 | 0.49616943 | 4.22E-13 | 7.70E-09   | 0.634 | 0.231 |
| SLC39A14  | 8 | 0.48788919 | 9.46E-11 | 1.73E-06   | 0.732 | 0.436 |
| TGM2      | 8 | 0.4659303  | 9.53E-12 | 1.74E-07   | 0.415 | 0.098 |
| C11orf96  | 8 | 0.45898824 | 8.49E-11 | 1.55E-06   | 0.341 | 0.068 |
| WWTR1     | 8 | 0.44433398 | 2.29E-10 | 4.19E-06   | 0.671 | 0.311 |
| FAP       | 8 | 0.43935067 | 1.72E-16 | 3.15E-12   | 0.561 | 0.133 |
| TREM1     | 8 | 0.42956266 | 4.02E-18 | 7.34E-14   | 0.268 | 0     |
| COL5A1    | 8 | 0.41545805 | 4.26E-07 | 0.00776462 | 0.573 | 0.314 |
| DNER      | 8 | 0.41134513 | 3.22E-08 | 0.00058841 | 0.488 | 0.205 |
| ERO1A     | 8 | 0.41069992 | 1.73E-06 | 0.03165783 | 0.622 | 0.386 |
| LARP6     | 8 | 0.40646984 | 2.64E-06 | 0.04817188 | 0.707 | 0.447 |
| SH3BGRL3  | 8 | 0.40402936 | 3.60E-08 | 0.00065775 | 1     | 0.992 |
| NT5E      | 8 | 0.39270107 | 2.99E-07 | 0.00545699 | 0.524 | 0.254 |
| SGIP1     | 8 | 0.38975459 | 1.11E-17 | 2.03E-13   | 0.293 | 0.008 |
| DUSP6     | 8 | 0.38215086 | 9.14E-07 | 0.01668176 | 0.293 | 0.087 |
| CCDC109B  | 8 | 0.38139535 | 2.02E-11 | 3.69E-07   | 0.549 | 0.182 |
| PHLDA2    | 8 | 0.37870851 | 4.54E-08 | 0.00082783 | 0.329 | 0.091 |
| PLAUR     | 8 | 0.37566393 | 2.26E-07 | 0.0041236  | 0.415 | 0.167 |
| NGF       | 8 | 0.37482894 | 4.66E-12 | 8.50E-08   | 0.256 | 0.023 |
| LINC00152 | 8 | 0.37389173 | 1.18E-06 | 0.02153161 | 0.512 | 0.254 |
| RNF145    | 8 | 0.3735038  | 1.07E-07 | 0.00195561 | 0.598 | 0.303 |
| SMOX      | 8 | 0.36921953 | 2.10E-10 | 3.83E-06   | 0.415 | 0.114 |
| IER3      | 8 | 0.36664883 | 4.54E-07 | 0.008281   | 0.439 | 0.174 |
| ITGB1     | 8 | 0.36545305 | 2.73E-06 | 0.04974186 | 0.817 | 0.614 |
| EPS8      | 8 | 0.36485704 | 1.16E-10 | 2.11E-06   | 0.451 | 0.133 |
| MMP3      | 8 | 0.36207323 | 2.51E-08 | 0.0004589  | 0.707 | 0.367 |

|            |   |            |          |            |       |       |
|------------|---|------------|----------|------------|-------|-------|
| SMOC1      | 8 | 0.34687094 | 2.62E-06 | 0.0477682  | 0.463 | 0.212 |
| C4orf3     | 8 | 0.33978961 | 6.71E-10 | 1.22E-05   | 0.988 | 0.97  |
| TYMP       | 8 | 0.33531012 | 3.41E-11 | 6.23E-07   | 0.427 | 0.106 |
| SEMA3A     | 8 | 0.32795248 | 1.80E-15 | 3.29E-11   | 0.366 | 0.042 |
| STK38L     | 8 | 0.32644159 | 1.38E-09 | 2.52E-05   | 0.378 | 0.102 |
| PDE4B      | 8 | 0.31153329 | 5.65E-11 | 1.03E-06   | 0.39  | 0.091 |
| FNIP2      | 8 | 0.30963447 | 3.25E-08 | 0.00059335 | 0.378 | 0.117 |
| KITLG      | 8 | 0.30738628 | 5.02E-11 | 9.16E-07   | 0.305 | 0.049 |
| PODNL1     | 8 | 0.29486548 | 1.75E-06 | 0.03199105 | 0.573 | 0.288 |
| F13A1      | 8 | 0.27217049 | 3.53E-07 | 0.00644744 | 0.378 | 0.129 |
| FZD8       | 8 | 0.27069585 | 3.35E-08 | 0.00061157 | 0.415 | 0.136 |
| RUNX1      | 8 | 0.2651344  | 1.46E-06 | 0.02667984 | 0.451 | 0.197 |
| AC090498.1 | 8 | 0.26472129 | 1.36E-08 | 0.00024735 | 1     | 1     |
| CLMP       | 8 | 0.26298946 | 8.09E-07 | 0.01475793 | 0.329 | 0.106 |
| CDKN2B     | 8 | 0.2603741  | 3.00E-11 | 5.48E-07   | 0.22  | 0.015 |
| PRRX2      | 8 | 0.25826301 | 2.04E-08 | 0.0003731  | 0.268 | 0.053 |
| PPP1R14C   | 8 | 0.25826301 | 8.27E-08 | 0.00150821 | 0.256 | 0.053 |
| GJA1       | 8 | 0.25459338 | 1.22E-06 | 0.02220494 | 0.366 | 0.133 |
| KDM7A      | 8 | 0.25293912 | 3.82E-11 | 6.97E-07   | 0.293 | 0.042 |
| CRYL1      | 8 | -0.2513536 | 2.58E-06 | 0.04716086 | 0.049 | 0.303 |
| RPL18A     | 8 | -0.2520051 | 2.35E-13 | 4.29E-09   | 1     | 1     |
| RPS5       | 8 | -0.2563959 | 1.15E-10 | 2.10E-06   | 1     | 1     |
| RPL23      | 8 | -0.2565689 | 1.34E-08 | 0.00024479 | 1     | 0.996 |
| SRP14      | 8 | -0.2621492 | 5.77E-07 | 0.01052312 | 0.988 | 1     |
| RPS19      | 8 | -0.2639272 | 1.55E-12 | 2.83E-08   | 1     | 1     |
| BTF3       | 8 | -0.2641901 | 4.79E-08 | 0.00087343 | 1     | 1     |
| TPT1       | 8 | -0.2688804 | 2.94E-11 | 5.37E-07   | 1     | 1     |
| TOMM7      | 8 | -0.2702371 | 1.54E-09 | 2.81E-05   | 1     | 1     |
| RPS9       | 8 | -0.2742005 | 2.09E-13 | 3.82E-09   | 1     | 1     |
| RPL14      | 8 | -0.2764811 | 9.12E-11 | 1.66E-06   | 1     | 1     |
| RPS12      | 8 | -0.2770668 | 2.14E-13 | 3.90E-09   | 1     | 1     |
| RPS23      | 8 | -0.2807657 | 1.25E-14 | 2.28E-10   | 1     | 1     |
| RARRES3    | 8 | -0.2876821 | 3.40E-07 | 0.00620503 | 0     | 0.258 |
| GPX4       | 8 | -0.2902154 | 6.38E-07 | 0.01163985 | 0.988 | 0.992 |
| RPL8       | 8 | -0.2918459 | 3.06E-16 | 5.59E-12   | 1     | 1     |
| RPS7       | 8 | -0.2924122 | 1.16E-12 | 2.11E-08   | 1     | 1     |
| RPL37      | 8 | -0.2926984 | 4.85E-16 | 8.86E-12   | 1     | 1     |
| COX7A2L    | 8 | -0.3013899 | 3.50E-07 | 0.00638916 | 0.841 | 0.939 |
| COMMD6     | 8 | -0.3030852 | 3.41E-09 | 6.23E-05   | 0.988 | 1     |

|          |   |            |          |            |       |       |
|----------|---|------------|----------|------------|-------|-------|
| RPL13    | 8 | -0.3062595 | 2.16E-19 | 3.94E-15   | 1     | 1     |
| RPL22    | 8 | -0.3124198 | 1.39E-12 | 2.54E-08   | 1     | 1     |
| UQCRB    | 8 | -0.3149251 | 6.66E-07 | 0.01215624 | 0.976 | 0.989 |
| RPS25    | 8 | -0.3158783 | 6.65E-17 | 1.21E-12   | 1     | 1     |
| RPS6     | 8 | -0.3159356 | 2.26E-19 | 4.12E-15   | 1     | 1     |
| PRUNE2   | 8 | -0.3174125 | 1.92E-06 | 0.0350824  | 0.085 | 0.36  |
| RPL19    | 8 | -0.3183727 | 6.89E-21 | 1.26E-16   | 1     | 1     |
| RPL21    | 8 | -0.3247526 | 2.22E-18 | 4.04E-14   | 1     | 1     |
| COX7C    | 8 | -0.3258862 | 4.55E-11 | 8.31E-07   | 1     | 1     |
| RPL13A   | 8 | -0.3287674 | 2.25E-21 | 4.10E-17   | 1     | 1     |
| CCDC102B | 8 | -0.3324292 | 2.45E-06 | 0.04463219 | 0.11  | 0.383 |
| NDUFA11  | 8 | -0.3326665 | 8.66E-08 | 0.00158009 | 0.89  | 0.97  |
| PRDX6    | 8 | -0.3369617 | 5.80E-08 | 0.0010576  | 0.78  | 0.909 |
| RPS27    | 8 | -0.3377268 | 1.67E-18 | 3.05E-14   | 1     | 1     |
| CRTAP    | 8 | -0.3399314 | 2.17E-07 | 0.00396802 | 0.793 | 0.909 |
| RPS17    | 8 | -0.3400225 | 3.90E-17 | 7.11E-13   | 1     | 1     |
| CALM2    | 8 | -0.3412828 | 4.47E-07 | 0.00815719 | 0.963 | 0.973 |
| ST13     | 8 | -0.3419501 | 1.74E-07 | 0.00317092 | 0.866 | 0.951 |
| RPL23A   | 8 | -0.3420657 | 3.85E-18 | 7.03E-14   | 1     | 1     |
| HSP90AB1 | 8 | -0.3457068 | 4.93E-08 | 0.00089957 | 0.951 | 0.981 |
| TMEM98   | 8 | -0.3487739 | 2.08E-07 | 0.00380021 | 0.232 | 0.545 |
| RPL34    | 8 | -0.3500223 | 3.94E-18 | 7.19E-14   | 1     | 1     |
| UBC      | 8 | -0.3513768 | 5.04E-08 | 0.00091979 | 0.817 | 0.936 |
| TSPO     | 8 | -0.3523611 | 6.07E-08 | 0.00110786 | 0.841 | 0.962 |
| CCNI     | 8 | -0.3558094 | 1.96E-08 | 0.00035685 | 1     | 0.992 |
| C2orf40  | 8 | -0.3590105 | 1.38E-06 | 0.02518553 | 0.963 | 1     |
| RPL10A   | 8 | -0.3611715 | 6.45E-16 | 1.18E-11   | 1     | 1     |
| RPS13    | 8 | -0.3644324 | 3.67E-17 | 6.70E-13   | 1     | 1     |
| CLU      | 8 | -0.365099  | 5.70E-07 | 0.01040087 | 0.988 | 1     |
| SOD1     | 8 | -0.369236  | 1.73E-08 | 0.00031504 | 0.866 | 0.973 |
| SPCS2    | 8 | -0.3700624 | 5.98E-08 | 0.0010918  | 0.61  | 0.83  |
| RPL18    | 8 | -0.3721546 | 3.39E-18 | 6.18E-14   | 1     | 1     |
| TXNIP    | 8 | -0.3729349 | 3.80E-07 | 0.00693464 | 0.012 | 0.277 |
| PLXDC2   | 8 | -0.373763  | 6.14E-07 | 0.01120598 | 0.549 | 0.739 |
| KHDRBS3  | 8 | -0.373763  | 3.67E-07 | 0.00669536 | 0.024 | 0.295 |
| EDF1     | 8 | -0.3781936 | 3.17E-11 | 5.78E-07   | 0.902 | 0.981 |
| TMED9    | 8 | -0.3813676 | 1.09E-06 | 0.01982271 | 0.561 | 0.795 |
| BEX2     | 8 | -0.3813676 | 1.45E-06 | 0.02639802 | 0.146 | 0.443 |
| SNHG8    | 8 | -0.3861408 | 7.94E-07 | 0.01449487 | 0.732 | 0.905 |

|          |   |            |          |            |       |       |
|----------|---|------------|----------|------------|-------|-------|
| RPS3A    | 8 | -0.3904186 | 5.26E-24 | 9.59E-20   | 1     | 1     |
| LDHB     | 8 | -0.3917627 | 1.02E-07 | 0.00185679 | 0.707 | 0.864 |
| PSMA7    | 8 | -0.392006  | 1.25E-07 | 0.00227913 | 0.829 | 0.894 |
| SSR3     | 8 | -0.3940904 | 9.80E-10 | 1.79E-05   | 0.902 | 0.973 |
| CTSD     | 8 | -0.3951654 | 1.71E-08 | 0.00031275 | 0.78  | 0.936 |
| EID1     | 8 | -0.39688   | 2.80E-09 | 5.10E-05   | 0.854 | 0.985 |
| CRIP2    | 8 | -0.3970359 | 5.06E-07 | 0.00923399 | 0.488 | 0.716 |
| TUBB     | 8 | -0.3983439 | 2.64E-06 | 0.04809499 | 0.622 | 0.856 |
| SEC11A   | 8 | -0.3986943 | 3.10E-09 | 5.65E-05   | 0.841 | 0.955 |
| RPL9     | 8 | -0.4006914 | 3.21E-22 | 5.85E-18   | 1     | 1     |
| RCN1     | 8 | -0.4030291 | 1.62E-06 | 0.02947349 | 0.512 | 0.705 |
| RPS16    | 8 | -0.4047896 | 5.64E-22 | 1.03E-17   | 1     | 1     |
| ARL2BP   | 8 | -0.4052283 | 2.34E-07 | 0.00427677 | 0.415 | 0.659 |
| ATRNL1   | 8 | -0.4066619 | 5.20E-07 | 0.00949542 | 0.171 | 0.466 |
| MORF4L2  | 8 | -0.4066733 | 1.14E-07 | 0.00207427 | 0.695 | 0.852 |
| PSAP     | 8 | -0.4086656 | 3.45E-08 | 0.00062949 | 0.793 | 0.924 |
| RPS27A   | 8 | -0.4090684 | 4.12E-25 | 7.51E-21   | 1     | 1     |
| MT-ND3   | 8 | -0.4095658 | 3.84E-07 | 0.00700016 | 0.793 | 0.962 |
| LAPTM4A  | 8 | -0.4100274 | 3.45E-08 | 0.00062964 | 0.89  | 0.977 |
| RPS8     | 8 | -0.4109458 | 7.09E-25 | 1.29E-20   | 1     | 1     |
| ANXA5    | 8 | -0.4118299 | 5.73E-07 | 0.01044738 | 0.634 | 0.837 |
| CST3     | 8 | -0.4221846 | 3.35E-10 | 6.11E-06   | 0.988 | 1     |
| SLC14A1  | 8 | -0.4230811 | 2.03E-07 | 0.00369654 | 0.268 | 0.557 |
| ATRAID   | 8 | -0.4238142 | 2.58E-09 | 4.70E-05   | 0.78  | 0.947 |
| GAS6     | 8 | -0.4277598 | 6.53E-08 | 0.00119143 | 0.146 | 0.473 |
| NPC2     | 8 | -0.4407042 | 2.60E-11 | 4.75E-07   | 0.976 | 0.989 |
| COL11A2  | 8 | -0.4446427 | 3.03E-09 | 5.52E-05   | 0.634 | 0.864 |
| RPL30    | 8 | -0.4495213 | 1.10E-23 | 2.02E-19   | 1     | 1     |
| CREG1    | 8 | -0.4516181 | 4.00E-09 | 7.30E-05   | 0.354 | 0.686 |
| GSTP1    | 8 | -0.4539257 | 6.70E-10 | 1.22E-05   | 0.915 | 0.992 |
| PEBP1    | 8 | -0.4569975 | 1.07E-09 | 1.95E-05   | 0.683 | 0.898 |
| PRDX4    | 8 | -0.4581592 | 2.74E-10 | 5.00E-06   | 0.817 | 0.966 |
| C6orf48  | 8 | -0.4602512 | 4.23E-09 | 7.71E-05   | 0.902 | 0.97  |
| HSP90AA1 | 8 | -0.46233   | 7.38E-08 | 0.00134741 | 0.5   | 0.769 |
| TMED10   | 8 | -0.4635036 | 6.50E-11 | 1.19E-06   | 0.841 | 0.966 |
| APOD     | 8 | -0.4635885 | 1.47E-07 | 0.00269026 | 0.098 | 0.409 |
| FCGRT    | 8 | -0.464342  | 3.15E-09 | 5.75E-05   | 0.427 | 0.739 |
| CHID1    | 8 | -0.4724937 | 5.82E-09 | 0.00010621 | 0.415 | 0.705 |
| EEF2     | 8 | -0.474226  | 3.49E-08 | 0.00063767 | 0.988 | 1     |



|         |   |            |          |            |       |       |
|---------|---|------------|----------|------------|-------|-------|
| RPL7    | 8 | -0.4777712 | 1.50E-22 | 2.74E-18   | 1     | 1     |
| MSMO1   | 8 | -0.4780783 | 2.01E-07 | 0.00366161 | 0.244 | 0.58  |
| COL9A2  | 8 | -0.47828   | 7.29E-07 | 0.0132935  | 0.488 | 0.697 |
| EIF3L   | 8 | -0.4785737 | 5.03E-12 | 9.18E-08   | 0.744 | 0.951 |
| RPS11   | 8 | -0.4811673 | 1.11E-19 | 2.02E-15   | 1     | 1     |
| RHOBTB3 | 8 | -0.4825104 | 8.80E-08 | 0.00160653 | 0.524 | 0.765 |
| ITM2B   | 8 | -0.4886814 | 1.85E-11 | 3.38E-07   | 0.988 | 0.992 |
| PLAC9   | 8 | -0.4900426 | 2.34E-11 | 4.27E-07   | 0.878 | 1     |
| SPON2   | 8 | -0.4919094 | 2.76E-09 | 5.03E-05   | 0.122 | 0.492 |
| CCPG1   | 8 | -0.4940185 | 2.29E-07 | 0.00418741 | 0.402 | 0.648 |
| COL2A1  | 8 | -0.4957399 | 2.95E-09 | 5.38E-05   | 0.951 | 1     |
| ISLR    | 8 | -0.4963219 | 3.10E-09 | 5.65E-05   | 0.415 | 0.739 |
| NUCB2   | 8 | -0.503153  | 2.31E-08 | 0.00042157 | 0.549 | 0.792 |
| RPL4    | 8 | -0.505718  | 8.69E-20 | 1.59E-15   | 1     | 1     |
| NAP1L1  | 8 | -0.5112255 | 3.03E-14 | 5.52E-10   | 0.854 | 0.962 |
| DDR2    | 8 | -0.5222453 | 6.92E-10 | 1.26E-05   | 0.402 | 0.727 |
| MT-ND2  | 8 | -0.5230603 | 7.88E-07 | 0.01438469 | 0.756 | 0.886 |
| CP      | 8 | -0.5235897 | 2.33E-08 | 0.00042503 | 0.378 | 0.693 |
| ACAN    | 8 | -0.5323327 | 4.93E-16 | 8.99E-12   | 0.976 | 1     |
| INSIG1  | 8 | -0.5329541 | 2.10E-07 | 0.00382882 | 0.354 | 0.674 |
| MIA     | 8 | -0.5351212 | 5.41E-14 | 9.87E-10   | 0.988 | 0.996 |
| PDIA6   | 8 | -0.5425503 | 2.90E-10 | 5.29E-06   | 0.756 | 0.902 |
| MYLK    | 8 | -0.5589916 | 4.48E-07 | 0.00817326 | 0.268 | 0.545 |
| RPLP0   | 8 | -0.5607529 | 2.00E-29 | 3.65E-25   | 1     | 1     |
| ITM2A   | 8 | -0.5653712 | 5.93E-09 | 0.00010816 | 0.439 | 0.727 |
| CPE     | 8 | -0.5681034 | 5.25E-09 | 9.58E-05   | 0.366 | 0.697 |
| HLA-C   | 8 | -0.5687684 | 4.44E-12 | 8.11E-08   | 0.829 | 0.962 |
| CITED2  | 8 | -0.5773653 | 3.25E-09 | 5.93E-05   | 0.317 | 0.648 |
| NGFRAP1 | 8 | -0.5818972 | 1.53E-17 | 2.78E-13   | 0.841 | 0.985 |
| IGFBP7  | 8 | -0.5938295 | 2.05E-11 | 3.74E-07   | 0.854 | 0.955 |
| EEF1A1  | 8 | -0.5966622 | 2.05E-28 | 3.74E-24   | 1     | 1     |
| ID3     | 8 | -0.5974656 | 1.29E-08 | 0.00023619 | 0.622 | 0.879 |
| ID4     | 8 | -0.6059729 | 9.84E-10 | 1.79E-05   | 0.598 | 0.841 |
| FTL     | 8 | -0.6080659 | 1.18E-23 | 2.15E-19   | 1     | 1     |
| FHL1    | 8 | -0.6107944 | 1.65E-11 | 3.00E-07   | 0.207 | 0.606 |
| PLPP1   | 8 | -0.6190147 | 2.32E-11 | 4.24E-07   | 0.159 | 0.557 |
| HLA-B   | 8 | -0.6396585 | 3.25E-13 | 5.92E-09   | 0.561 | 0.852 |
| DDIT4   | 8 | -0.6428531 | 2.08E-06 | 0.03789463 | 0.329 | 0.606 |
| RPS20   | 8 | -0.6432799 | 2.20E-29 | 4.02E-25   | 1     | 1     |

| NUPR1    | 8       | -0.6445331 | 1.83E-11 | 3.34E-07   | 0.963 | 0.996 |
|----------|---------|------------|----------|------------|-------|-------|
| MFGE8    | 8       | -0.6489629 | 7.33E-12 | 1.34E-07   | 0.732 | 0.913 |
| ID2      | 8       | -0.6588007 | 5.03E-09 | 9.18E-05   | 0.561 | 0.792 |
| PAX1     | 8       | -0.6734777 | 3.13E-13 | 5.72E-09   | 0.561 | 0.871 |
| ZFAS1    | 8       | -0.6773151 | 9.31E-19 | 1.70E-14   | 0.939 | 0.996 |
| PKM      | 8       | -0.681905  | 7.03E-15 | 1.28E-10   | 0.915 | 0.958 |
| HLA-A    | 8       | -0.6951222 | 6.65E-14 | 1.21E-09   | 0.78  | 0.924 |
| B2M      | 8       | -0.6972409 | 4.01E-20 | 7.32E-16   | 0.963 | 1     |
| ID1      | 8       | -0.7098716 | 3.66E-07 | 0.00667705 | 0.732 | 0.864 |
| CHRD2    | 8       | -0.7142684 | 2.31E-10 | 4.22E-06   | 0.037 | 0.413 |
| EIF3H    | 8       | -0.7257871 | 6.84E-24 | 1.25E-19   | 0.951 | 0.992 |
| TMEM59   | 8       | -0.7307678 | 4.56E-19 | 8.32E-15   | 0.915 | 0.985 |
| SDC2     | 8       | -0.7390773 | 2.03E-19 | 3.70E-15   | 0.817 | 0.981 |
| SNAI2    | 8       | -0.7859906 | 6.72E-10 | 1.23E-05   | 0.488 | 0.765 |
| CD9      | 8       | -0.805106  | 3.89E-13 | 7.10E-09   | 0.293 | 0.678 |
| DCN      | 8       | -0.8082969 | 7.00E-23 | 1.28E-18   | 1     | 1     |
| FBXO2    | 8       | -0.8707371 | 1.77E-23 | 3.23E-19   | 0.646 | 0.985 |
| IGFBP6   | 8       | -0.8788818 | 1.68E-15 | 3.07E-11   | 0.695 | 0.928 |
| MGP      | 8       | -0.8842117 | 1.34E-15 | 2.45E-11   | 0.988 | 1     |
| ADIRF    | 8       | -0.9371631 | 9.25E-17 | 1.69E-12   | 0.354 | 0.807 |
| FTH1     | 8       | -0.9698113 | 5.67E-31 | 1.04E-26   | 1     | 1     |
| CAPS     | 8       | -0.9931827 | 5.09E-21 | 9.29E-17   | 0.683 | 0.977 |
| COL9A3   | 8       | -1.0212242 | 1.68E-20 | 3.07E-16   | 0.634 | 0.951 |
| C2orf82  | 8       | -1.1068023 | 8.87E-26 | 1.62E-21   | 0.927 | 1     |
| LECT1    | 8       | -1.1132151 | 3.15E-24 | 5.75E-20   | 0.841 | 0.985 |
| OGN      | 8       | -1.1484734 | 1.12E-23 | 2.03E-19   | 0.805 | 0.996 |
| CLEC3A   | 8       | -1.2313356 | 2.21E-23 | 4.04E-19   | 0.537 | 0.943 |
| CRISPLD1 | 8       | -1.3869398 | 3.71E-24 | 6.78E-20   | 0.061 | 0.742 |
| FRZB     | 8       | -1.4765016 | 7.95E-20 | 1.45E-15   | 0.207 | 0.784 |
| SLPI     | 8       | -1.600589  | 4.60E-18 | 8.39E-14   | 0.854 | 1     |
| SPTSSB   | 8       | -1.7198785 | 4.34E-27 | 7.93E-23   | 0.049 | 0.784 |
| gene     | cluster | avg_logFC  | p_val    | p_val_adj  | pct.1 | pct.2 |
| COL1A1   | 9       | 1.98487474 | 6.94E-18 | 1.27E-13   | 0.682 | 0.108 |
| TGFBI    | 9       | 1.95399427 | 2.34E-29 | 4.28E-25   | 1     | 0.541 |
| MT2A     | 9       | 1.79699428 | 2.82E-18 | 5.14E-14   | 1     | 0.955 |
| PRG4     | 9       | 1.56820125 | 5.22E-14 | 9.53E-10   | 0.761 | 0.297 |
| CTHRC1   | 9       | 1.52363759 | 4.37E-24 | 7.98E-20   | 0.886 | 0.306 |
| SPP1     | 9       | 1.4508406  | 1.31E-16 | 2.38E-12   | 0.557 | 0.036 |
| IL11     | 9       | 1.12001244 | 1.07E-09 | 1.96E-05   | 0.352 | 0.027 |

|             |   |            |          |            |       |       |
|-------------|---|------------|----------|------------|-------|-------|
| POSTN       | 9 | 1.1094336  | 5.65E-10 | 1.03E-05   | 0.386 | 0.036 |
| TNC         | 9 | 1.00244296 | 1.26E-19 | 2.30E-15   | 0.739 | 0.135 |
| CYTL1       | 9 | 0.90379872 | 1.30E-13 | 2.38E-09   | 0.784 | 0.279 |
| CTSL        | 9 | 0.84837953 | 2.95E-08 | 0.00053886 | 0.886 | 0.757 |
| MT1X        | 9 | 0.83641406 | 7.49E-08 | 0.00136754 | 0.989 | 0.982 |
| IGFBP3      | 9 | 0.8211677  | 6.45E-09 | 0.00011766 | 0.773 | 0.396 |
| LTBP1       | 9 | 0.76517182 | 1.37E-19 | 2.51E-15   | 0.716 | 0.108 |
| COL1A2      | 9 | 0.76466887 | 2.54E-06 | 0.04628643 | 0.864 | 0.775 |
| SERPINE2    | 9 | 0.74880671 | 5.71E-12 | 1.04E-07   | 1     | 1     |
| PHLDA1      | 9 | 0.70699319 | 1.71E-08 | 0.00031261 | 0.455 | 0.117 |
| ENPP1       | 9 | 0.65075503 | 1.40E-06 | 0.02555158 | 0.693 | 0.387 |
| FAP         | 9 | 0.60964546 | 6.07E-12 | 1.11E-07   | 0.83  | 0.378 |
| VMP1        | 9 | 0.59955865 | 1.48E-09 | 2.69E-05   | 0.83  | 0.541 |
| TFPI2       | 9 | 0.59545814 | 8.30E-07 | 0.01514951 | 0.318 | 0.054 |
| SMOC1       | 9 | 0.55913373 | 3.45E-08 | 0.00062947 | 0.841 | 0.613 |
| LINC00152   | 9 | 0.55100638 | 3.56E-07 | 0.00650377 | 0.818 | 0.595 |
| GNG11       | 9 | 0.54862487 | 1.32E-06 | 0.02401254 | 0.693 | 0.414 |
| PLAUR       | 9 | 0.54002003 | 2.63E-08 | 0.00048074 | 0.705 | 0.342 |
| GJA1        | 9 | 0.53651478 | 1.37E-07 | 0.00250173 | 0.591 | 0.243 |
| MIF         | 9 | 0.5060195  | 9.97E-17 | 1.82E-12   | 1     | 1     |
| CLEC11A     | 9 | 0.49634496 | 5.53E-07 | 0.01009447 | 0.909 | 0.784 |
| TMSB4X      | 9 | 0.47317181 | 2.28E-07 | 0.0041528  | 0.977 | 0.874 |
| PTGES       | 9 | 0.47214406 | 2.68E-11 | 4.89E-07   | 0.443 | 0.045 |
| FBLN1       | 9 | 0.46318012 | 5.83E-10 | 1.06E-05   | 0.523 | 0.126 |
| COL6A3      | 9 | 0.46147193 | 1.22E-06 | 0.02231186 | 0.864 | 0.577 |
| FN1         | 9 | 0.45419081 | 1.52E-09 | 2.78E-05   | 1     | 0.991 |
| TMSB10      | 9 | 0.44676533 | 2.26E-08 | 0.00041292 | 1     | 0.991 |
| SOX4        | 9 | 0.44511538 | 2.38E-08 | 0.00043496 | 0.364 | 0.054 |
| MIR4435-2HG | 9 | 0.43852982 | 2.55E-06 | 0.04661852 | 0.761 | 0.468 |
| CD44        | 9 | 0.42771646 | 3.98E-07 | 0.00726156 | 0.92  | 0.685 |
| BMP2        | 9 | 0.4263494  | 1.43E-06 | 0.02612129 | 0.216 | 0.009 |
| SPOCK1      | 9 | 0.42000946 | 1.69E-10 | 3.08E-06   | 0.477 | 0.081 |
| ADAMTS6     | 9 | 0.41585813 | 9.76E-09 | 0.00017809 | 0.466 | 0.117 |
| CRLF1       | 9 | 0.39924747 | 1.41E-06 | 0.02581144 | 0.659 | 0.351 |
| TMEM59L     | 9 | 0.39727314 | 2.02E-08 | 0.00036885 | 0.352 | 0.045 |
| TREM1       | 9 | 0.37350692 | 9.26E-10 | 1.69E-05   | 0.318 | 0.009 |
| MMP14       | 9 | 0.36744743 | 1.82E-06 | 0.03324805 | 0.568 | 0.261 |
| EVI2A       | 9 | 0.36140512 | 3.66E-07 | 0.00666977 | 0.295 | 0.036 |
| JAG1        | 9 | 0.35355424 | 1.85E-06 | 0.03384495 | 0.386 | 0.108 |

|              |   |            |          |            |       |       |
|--------------|---|------------|----------|------------|-------|-------|
| SLC38A5      | 9 | 0.34905773 | 3.93E-07 | 0.00717758 | 0.386 | 0.09  |
| TNFSF11      | 9 | 0.34200825 | 2.65E-08 | 0.00048312 | 0.273 | 0.009 |
| SGIP1        | 9 | 0.3162765  | 4.09E-08 | 0.00074677 | 0.307 | 0.027 |
| SRPX2        | 9 | 0.29673191 | 2.02E-06 | 0.03686423 | 0.568 | 0.243 |
| LAMA4        | 9 | 0.28020261 | 2.06E-06 | 0.03757081 | 0.341 | 0.072 |
| PLCD3        | 9 | -0.2584295 | 2.39E-06 | 0.04363635 | 0.023 | 0.27  |
| RPL37        | 9 | -0.2606483 | 7.51E-07 | 0.01369636 | 1     | 1     |
| RPLP2        | 9 | -0.2627266 | 6.05E-07 | 0.01104672 | 1     | 1     |
| RPL13A       | 9 | -0.2646556 | 8.36E-07 | 0.01524681 | 1     | 1     |
| KHDRBS3      | 9 | -0.2719432 | 1.38E-06 | 0.02521356 | 0.023 | 0.279 |
| CSTB         | 9 | -0.291566  | 2.38E-06 | 0.04338322 | 0.989 | 0.991 |
| RPL10A       | 9 | -0.2956243 | 1.85E-06 | 0.03375941 | 1     | 1     |
| RPS17        | 9 | -0.2982527 | 2.42E-07 | 0.0044179  | 1     | 1     |
| RP11-71N10.1 | 9 | -0.3030508 | 1.05E-06 | 0.01918506 | 0.011 | 0.261 |
| CD8B         | 9 | -0.3108015 | 1.96E-06 | 0.03580328 | 0.159 | 0.477 |
| ARFGAP3      | 9 | -0.3119979 | 2.54E-06 | 0.04633493 | 0.227 | 0.559 |
| ITGB5        | 9 | -0.317853  | 1.74E-06 | 0.03183668 | 0.159 | 0.486 |
| RPS25        | 9 | -0.319942  | 7.42E-07 | 0.01354178 | 1     | 1     |
| TENM3        | 9 | -0.3211919 | 1.70E-07 | 0.00310755 | 0.045 | 0.351 |
| KAZALD1      | 9 | -0.3219127 | 1.44E-06 | 0.02633302 | 0.17  | 0.486 |
| RPL23A       | 9 | -0.3224779 | 1.42E-07 | 0.00259511 | 1     | 1     |
| TMED10       | 9 | -0.3271028 | 7.22E-07 | 0.01318037 | 0.955 | 0.982 |
| SEC11C       | 9 | -0.3344696 | 1.14E-06 | 0.02079805 | 0.114 | 0.432 |
| RHOA         | 9 | -0.3400223 | 8.73E-07 | 0.01593633 | 0.943 | 0.991 |
| TMEM59       | 9 | -0.3451962 | 5.60E-07 | 0.0102225  | 0.989 | 1     |
| HLA-A        | 9 | -0.3460962 | 2.54E-06 | 0.04629875 | 0.989 | 0.991 |
| SRSF8        | 9 | -0.3486865 | 1.53E-06 | 0.02787112 | 0.216 | 0.55  |
| TXNIP        | 9 | -0.3494013 | 1.35E-06 | 0.0246549  | 0.023 | 0.279 |
| RPLP1        | 9 | -0.3555031 | 1.30E-10 | 2.38E-06   | 1     | 1     |
| ISM1         | 9 | -0.35675   | 2.66E-06 | 0.04855941 | 0.08  | 0.36  |
| RPS27        | 9 | -0.3627618 | 1.18E-07 | 0.00215901 | 1     | 1     |
| RPL4         | 9 | -0.3645747 | 1.38E-07 | 0.00251496 | 1     | 1     |
| C1QTNF8      | 9 | -0.3711838 | 1.88E-06 | 0.03431337 | 0.114 | 0.414 |
| RPL7         | 9 | -0.3865184 | 6.93E-09 | 0.00012646 | 1     | 1     |
| RPL9         | 9 | -0.3895603 | 1.97E-10 | 3.60E-06   | 1     | 1     |
| AFF3         | 9 | -0.3908442 | 2.76E-07 | 0.00502903 | 0.08  | 0.396 |
| SMIM5        | 9 | -0.3919609 | 3.95E-09 | 7.21E-05   | 0.023 | 0.369 |
| COMMD6       | 9 | -0.3929389 | 1.53E-07 | 0.00279435 | 0.943 | 0.973 |
| A2M          | 9 | -0.3971641 | 3.45E-07 | 0.00630375 | 0.011 | 0.279 |

|          |   |            |          |            |       |       |
|----------|---|------------|----------|------------|-------|-------|
| ARL2BP   | 9 | -0.4018061 | 1.07E-06 | 0.01958525 | 0.511 | 0.784 |
| JTB      | 9 | -0.4059949 | 1.98E-07 | 0.00360472 | 0.648 | 0.883 |
| AHNAK2   | 9 | -0.4101815 | 8.58E-07 | 0.01566399 | 0.125 | 0.441 |
| OSBPL9   | 9 | -0.4144338 | 1.55E-06 | 0.02821037 | 0.307 | 0.604 |
| LPP      | 9 | -0.4210372 | 1.32E-06 | 0.02416763 | 0.25  | 0.55  |
| HLA-C    | 9 | -0.4214887 | 1.13E-06 | 0.02066762 | 0.966 | 0.991 |
| ATRAID   | 9 | -0.4244756 | 4.30E-08 | 0.00078409 | 0.943 | 0.955 |
| RPS8     | 9 | -0.4295999 | 6.97E-13 | 1.27E-08   | 1     | 1     |
| COL14A1  | 9 | -0.433998  | 2.32E-07 | 0.00423061 | 0.068 | 0.378 |
| TIMP4    | 9 | -0.434567  | 8.56E-09 | 0.00015626 | 0.091 | 0.459 |
| ATRNL1   | 9 | -0.4399004 | 7.67E-09 | 0.00014003 | 0.091 | 0.459 |
| RPS11    | 9 | -0.4413837 | 8.02E-12 | 1.46E-07   | 0.989 | 1     |
| SCIN     | 9 | -0.4417224 | 1.51E-06 | 0.02762172 | 0.182 | 0.486 |
| ZBTB20   | 9 | -0.4511976 | 1.27E-07 | 0.00231697 | 0.148 | 0.486 |
| SLC14A1  | 9 | -0.4516514 | 1.23E-07 | 0.00223909 | 0.17  | 0.523 |
| SLC40A1  | 9 | -0.4609538 | 2.60E-06 | 0.04752438 | 0.125 | 0.414 |
| CXXC5    | 9 | -0.4644442 | 2.26E-07 | 0.00412902 | 0.477 | 0.73  |
| RPLP0    | 9 | -0.4684165 | 6.97E-14 | 1.27E-09   | 1     | 1     |
| TBL1XR1  | 9 | -0.4746526 | 1.16E-06 | 0.02120354 | 0.455 | 0.721 |
| RPL30    | 9 | -0.4766668 | 6.31E-13 | 1.15E-08   | 1     | 1     |
| DNM3OS   | 9 | -0.4775931 | 2.91E-07 | 0.00530431 | 0.466 | 0.73  |
| GPC1     | 9 | -0.4786534 | 6.52E-11 | 1.19E-06   | 0.227 | 0.685 |
| C1S      | 9 | -0.4809323 | 5.53E-07 | 0.01008899 | 0.636 | 0.892 |
| ARL6IP5  | 9 | -0.4869293 | 2.04E-09 | 3.73E-05   | 0.727 | 0.901 |
| CCDC102B | 9 | -0.4874805 | 4.16E-10 | 7.59E-06   | 0.045 | 0.441 |
| SPINT2   | 9 | -0.4892385 | 4.82E-07 | 0.00879466 | 0.295 | 0.613 |
| MT-ND3   | 9 | -0.4901956 | 4.79E-08 | 0.00087492 | 0.83  | 0.91  |
| PNRC1    | 9 | -0.4908068 | 8.13E-07 | 0.0148393  | 0.648 | 0.919 |
| TSPAN4   | 9 | -0.5019618 | 4.28E-09 | 7.80E-05   | 0.807 | 0.901 |
| B2M      | 9 | -0.5113682 | 1.72E-11 | 3.13E-07   | 1     | 1     |
| TPT1     | 9 | -0.5128256 | 1.09E-11 | 1.98E-07   | 1     | 1     |
| PLXDC2   | 9 | -0.5132533 | 1.00E-07 | 0.00183137 | 0.489 | 0.739 |
| HERPUD1  | 9 | -0.5285119 | 3.45E-07 | 0.00629234 | 0.636 | 0.829 |
| CHI3L1   | 9 | -0.5449192 | 1.11E-07 | 0.00201996 | 0.511 | 0.892 |
| EEF2     | 9 | -0.5514678 | 8.08E-10 | 1.47E-05   | 0.955 | 0.982 |
| MYLK     | 9 | -0.5649977 | 4.09E-08 | 0.00074667 | 0.239 | 0.604 |
| SLC38A1  | 9 | -0.5677838 | 4.43E-12 | 8.08E-08   | 0.148 | 0.622 |
| C2orf40  | 9 | -0.5740731 | 1.72E-07 | 0.00314119 | 0.83  | 0.955 |
| COL9A2   | 9 | -0.581033  | 1.21E-06 | 0.02215533 | 0.352 | 0.676 |

|          |   |            |          |            |       |       |
|----------|---|------------|----------|------------|-------|-------|
| CRIP2    | 9 | -0.5810981 | 6.09E-08 | 0.00111204 | 0.398 | 0.73  |
| SDC2     | 9 | -0.5840865 | 1.58E-11 | 2.89E-07   | 0.852 | 0.991 |
| FXVD6    | 9 | -0.5873249 | 2.71E-12 | 4.95E-08   | 0.773 | 0.937 |
| MALAT1   | 9 | -0.5911339 | 2.04E-08 | 0.00037187 | 1     | 1     |
| NOV      | 9 | -0.5964993 | 8.34E-07 | 0.01521147 | 0.057 | 0.342 |
| FMOD     | 9 | -0.6008292 | 1.24E-08 | 0.00022628 | 0.864 | 0.946 |
| FTL      | 9 | -0.6008527 | 3.47E-13 | 6.34E-09   | 1     | 1     |
| NINJ1    | 9 | -0.6065938 | 3.24E-12 | 5.91E-08   | 0.216 | 0.712 |
| SERPINA5 | 9 | -0.6066343 | 1.65E-06 | 0.03007842 | 0.693 | 0.865 |
| PDE4DIP  | 9 | -0.617463  | 2.44E-11 | 4.45E-07   | 0.33  | 0.73  |
| RPS20    | 9 | -0.6190717 | 1.03E-15 | 1.88E-11   | 0.989 | 1     |
| SPTSSB   | 9 | -0.6215045 | 1.04E-07 | 0.00189409 | 0.011 | 0.297 |
| NGFRAP1  | 9 | -0.6231205 | 1.43E-15 | 2.61E-11   | 0.886 | 0.991 |
| CST3     | 9 | -0.6316183 | 1.29E-14 | 2.36E-10   | 0.977 | 1     |
| MATN4    | 9 | -0.6414422 | 4.54E-07 | 0.0082768  | 0.023 | 0.297 |
| EEF1A1   | 9 | -0.6423597 | 3.10E-17 | 5.66E-13   | 1     | 1     |
| ITM2A    | 9 | -0.6473322 | 4.16E-09 | 7.60E-05   | 0.545 | 0.838 |
| FTH1     | 9 | -0.648118  | 2.81E-16 | 5.13E-12   | 1     | 1     |
| ISLR     | 9 | -0.6482782 | 5.54E-12 | 1.01E-07   | 0.705 | 0.946 |
| PSAP     | 9 | -0.6660036 | 2.03E-12 | 3.71E-08   | 0.818 | 0.982 |
| PAX1     | 9 | -0.6874068 | 2.83E-11 | 5.16E-07   | 0.625 | 0.883 |
| MT-ND2   | 9 | -0.6923278 | 2.69E-09 | 4.91E-05   | 0.784 | 0.901 |
| CP       | 9 | -0.7117489 | 7.74E-07 | 0.01411899 | 0.398 | 0.73  |
| CLU      | 9 | -0.7130899 | 9.54E-09 | 0.000174   | 0.955 | 0.991 |
| ZFAS1    | 9 | -0.72305   | 1.19E-08 | 0.00021765 | 0.795 | 0.91  |
| APOD     | 9 | -0.7271568 | 2.74E-09 | 5.00E-05   | 0.136 | 0.514 |
| CRISPLD1 | 9 | -0.7523056 | 7.86E-07 | 0.01433362 | 0.148 | 0.45  |
| ID4      | 9 | -0.7707362 | 7.96E-08 | 0.00145282 | 0.511 | 0.757 |
| CPE      | 9 | -0.7712832 | 2.52E-12 | 4.60E-08   | 0.523 | 0.865 |
| MIA      | 9 | -0.78026   | 1.75E-11 | 3.20E-07   | 0.83  | 0.973 |
| MOXD1    | 9 | -0.7874757 | 9.61E-14 | 1.75E-09   | 0.136 | 0.64  |
| SOD3     | 9 | -0.804061  | 8.19E-11 | 1.49E-06   | 0.739 | 0.982 |
| ID2      | 9 | -0.8098861 | 2.53E-07 | 0.004614   | 0.557 | 0.775 |
| DCN      | 9 | -0.8182076 | 4.44E-14 | 8.09E-10   | 1     | 1     |
| EIF3H    | 9 | -0.8508544 | 1.01E-16 | 1.84E-12   | 0.83  | 0.982 |
| NUPR1    | 9 | -0.8707667 | 1.64E-09 | 2.99E-05   | 0.807 | 0.937 |
| ADIRF    | 9 | -0.8943092 | 2.06E-11 | 3.76E-07   | 0.307 | 0.766 |
| CRYAB    | 9 | -0.9240317 | 5.17E-12 | 9.43E-08   | 0.852 | 0.955 |
| MFGE8    | 9 | -0.9260696 | 3.43E-15 | 6.25E-11   | 0.807 | 0.964 |

| LECT1    | 9       | -0.9404783 | 4.24E-10 | 7.73E-06   | 0.625 | 0.892 |
|----------|---------|------------|----------|------------|-------|-------|
| FGFBP2   | 9       | -0.9589062 | 4.35E-09 | 7.94E-05   | 0.58  | 0.874 |
| PLPP1    | 9       | -0.9649237 | 1.70E-14 | 3.10E-10   | 0.511 | 0.865 |
| COL9A3   | 9       | -1.0138506 | 1.32E-10 | 2.40E-06   | 0.42  | 0.802 |
| CITED2   | 9       | -1.0291615 | 5.12E-08 | 0.00093345 | 0.443 | 0.694 |
| COL11A2  | 9       | -1.029599  | 7.99E-14 | 1.46E-09   | 0.261 | 0.721 |
| IGFBP6   | 9       | -1.0487405 | 4.31E-19 | 7.87E-15   | 0.636 | 0.973 |
| S100A1   | 9       | -1.0596004 | 1.86E-16 | 3.39E-12   | 0.83  | 0.964 |
| MGP      | 9       | -1.0901704 | 2.33E-13 | 4.26E-09   | 0.977 | 1     |
| PLAC9    | 9       | -1.0911871 | 2.27E-18 | 4.13E-14   | 0.75  | 0.964 |
| FRZB     | 9       | -1.160896  | 1.97E-10 | 3.60E-06   | 0.159 | 0.577 |
| TSC22D1  | 9       | -1.1928155 | 4.93E-12 | 8.99E-08   | 0.432 | 0.784 |
| OGN      | 9       | -1.2046262 | 1.20E-12 | 2.18E-08   | 0.636 | 0.937 |
| ACAN     | 9       | -1.2279623 | 6.33E-17 | 1.15E-12   | 0.83  | 0.964 |
| FBXO2    | 9       | -1.2482882 | 1.08E-22 | 1.96E-18   | 0.432 | 0.937 |
| CLEC3A   | 9       | -1.2867305 | 7.81E-13 | 1.42E-08   | 0.102 | 0.586 |
| FHL1     | 9       | -1.3438816 | 3.60E-20 | 6.57E-16   | 0.307 | 0.856 |
| COL2A1   | 9       | -1.4173024 | 1.96E-16 | 3.58E-12   | 0.511 | 0.946 |
| C2orf82  | 9       | -1.429542  | 1.65E-16 | 3.01E-12   | 0.739 | 0.928 |
| CAPS     | 9       | -1.6254376 | 3.77E-24 | 6.89E-20   | 0.443 | 0.946 |
| SLPI     | 9       | -1.6937446 | 4.22E-18 | 7.69E-14   | 0.648 | 0.964 |
| gene     | cluster | avg_logFC  | p_val    | p_val_adj  | pct.1 | pct.2 |
| SPP1     | 10      | 2.74826017 | 2.77E-20 | 5.06E-16   | 0.876 | 0.125 |
| PRG4     | 10      | 2.11408356 | 3.16E-15 | 5.76E-11   | 0.703 | 0.036 |
| MT2A     | 10      | 2.11088645 | 8.26E-23 | 1.51E-18   | 1     | 0.982 |
| SOD2     | 10      | 1.49006915 | 3.82E-18 | 6.97E-14   | 1     | 0.804 |
| HMGA1    | 10      | 1.44781108 | 3.80E-19 | 6.94E-15   | 0.862 | 0.196 |
| UPP1     | 10      | 1.41526068 | 5.56E-21 | 1.01E-16   | 0.883 | 0.161 |
| CTSL     | 10      | 1.38441171 | 1.28E-15 | 2.33E-11   | 0.841 | 0.232 |
| IGFBP3   | 10      | 1.36720338 | 5.74E-12 | 1.05E-07   | 0.641 | 0.107 |
| COMP     | 10      | 1.35891967 | 1.65E-16 | 3.01E-12   | 0.945 | 0.643 |
| PTGS2    | 10      | 1.29262374 | 1.05E-17 | 1.91E-13   | 0.759 | 0.036 |
| CD55     | 10      | 1.19586118 | 5.01E-19 | 9.14E-15   | 0.966 | 0.446 |
| C11orf96 | 10      | 1.18385085 | 4.63E-13 | 8.44E-09   | 0.655 | 0.071 |
| VEGFA    | 10      | 1.12260989 | 2.42E-14 | 4.41E-10   | 0.862 | 0.339 |
| MT1X     | 10      | 1.11771814 | 5.78E-08 | 0.00105503 | 1     | 1     |
| WTAP     | 10      | 1.11620945 | 2.89E-14 | 5.27E-10   | 0.972 | 0.804 |
| NRP2     | 10      | 1.07799899 | 1.71E-13 | 3.12E-09   | 0.697 | 0.089 |
| S100A2   | 10      | 1.07033531 | 4.75E-12 | 8.67E-08   | 0.779 | 0.286 |

|            |    |            |          |            |       |       |
|------------|----|------------|----------|------------|-------|-------|
| SERPINE2   | 10 | 1.05752477 | 2.82E-10 | 5.14E-06   | 1     | 1     |
| CTNNB1     | 10 | 1.01853309 | 3.39E-15 | 6.18E-11   | 0.959 | 0.75  |
| MRPS6      | 10 | 0.98963213 | 7.57E-11 | 1.38E-06   | 0.966 | 0.893 |
| STK17A     | 10 | 0.96554056 | 1.02E-14 | 1.86E-10   | 0.745 | 0.107 |
| DDIT4L     | 10 | 0.91919838 | 9.01E-10 | 1.64E-05   | 0.862 | 0.482 |
| PPP3CA     | 10 | 0.90874631 | 2.90E-15 | 5.28E-11   | 0.993 | 0.929 |
| ERO1A      | 10 | 0.89753583 | 1.16E-13 | 2.12E-09   | 0.848 | 0.304 |
| VAPA       | 10 | 0.88454864 | 2.23E-18 | 4.07E-14   | 0.993 | 0.875 |
| TIMP3      | 10 | 0.88420564 | 3.28E-08 | 0.00059817 | 0.738 | 0.411 |
| TNFRSF12A  | 10 | 0.87043748 | 3.98E-10 | 7.27E-06   | 0.634 | 0.143 |
| CCDC85B    | 10 | 0.86489703 | 7.28E-10 | 1.33E-05   | 0.931 | 0.732 |
| TM4SF1     | 10 | 0.85893083 | 1.07E-09 | 1.96E-05   | 0.731 | 0.268 |
| FN1        | 10 | 0.85790189 | 3.39E-12 | 6.19E-08   | 1     | 1     |
| DNAJB9     | 10 | 0.85461253 | 7.64E-13 | 1.39E-08   | 0.869 | 0.429 |
| BZW1       | 10 | 0.83682502 | 1.14E-12 | 2.09E-08   | 0.89  | 0.393 |
| SMOX       | 10 | 0.83560414 | 4.09E-09 | 7.47E-05   | 0.641 | 0.214 |
| SNHG12     | 10 | 0.82963618 | 2.23E-13 | 4.06E-09   | 0.8   | 0.25  |
| ARF6       | 10 | 0.82639118 | 7.15E-14 | 1.30E-09   | 0.89  | 0.446 |
| MIF        | 10 | 0.82424635 | 1.09E-21 | 1.99E-17   | 1     | 1     |
| RABGGTB    | 10 | 0.81220654 | 8.96E-16 | 1.63E-11   | 0.924 | 0.571 |
| GOLT1B     | 10 | 0.81131328 | 3.77E-11 | 6.88E-07   | 0.641 | 0.143 |
| SELK       | 10 | 0.80818429 | 5.05E-14 | 9.21E-10   | 0.972 | 0.661 |
| PPP1CB     | 10 | 0.78986756 | 1.33E-19 | 2.42E-15   | 1     | 0.964 |
| ISG20      | 10 | 0.78791385 | 4.44E-12 | 8.10E-08   | 0.759 | 0.286 |
| NDRG1      | 10 | 0.78675633 | 3.25E-10 | 5.93E-06   | 0.745 | 0.357 |
| CSGALNACT2 | 10 | 0.77138455 | 2.90E-10 | 5.29E-06   | 0.559 | 0.071 |
| GSTO1      | 10 | 0.76380092 | 1.76E-13 | 3.22E-09   | 0.924 | 0.536 |
| DNER       | 10 | 0.76016108 | 1.40E-09 | 2.55E-05   | 0.717 | 0.268 |
| BHLHE40    | 10 | 0.75758546 | 9.96E-08 | 0.00181657 | 0.731 | 0.393 |
| BMP2       | 10 | 0.75176987 | 2.06E-09 | 3.75E-05   | 0.476 | 0.018 |
| BAALC      | 10 | 0.74700335 | 5.86E-07 | 0.01069239 | 0.662 | 0.339 |
| CTHRC1     | 10 | 0.74357803 | 1.96E-09 | 3.58E-05   | 0.455 | 0     |
| PMP22      | 10 | 0.72971185 | 3.98E-13 | 7.26E-09   | 0.959 | 0.75  |
| EIF4EBP1   | 10 | 0.72411761 | 3.45E-08 | 0.00062974 | 0.69  | 0.304 |
| PPP1R15A   | 10 | 0.7177751  | 1.79E-07 | 0.00325924 | 0.655 | 0.268 |
| RELB       | 10 | 0.71449717 | 1.40E-09 | 2.55E-05   | 0.559 | 0.089 |
| ARPP19     | 10 | 0.68725502 | 8.03E-10 | 1.46E-05   | 0.738 | 0.304 |
| DDIT3      | 10 | 0.68496331 | 1.87E-09 | 3.42E-05   | 0.752 | 0.25  |
| TMSB10     | 10 | 0.67896593 | 3.42E-10 | 6.24E-06   | 0.993 | 1     |



|          |    |            |          |            |       |       |
|----------|----|------------|----------|------------|-------|-------|
| RNF145   | 10 | 0.67436057 | 1.06E-07 | 0.00194256 | 0.6   | 0.214 |
| ENO2     | 10 | 0.66880865 | 2.51E-09 | 4.58E-05   | 0.69  | 0.286 |
| SLC25A37 | 10 | 0.66292205 | 1.36E-10 | 2.47E-06   | 0.966 | 0.661 |
| CCND1    | 10 | 0.66108158 | 8.20E-09 | 0.00014963 | 0.586 | 0.143 |
| SLC2A1   | 10 | 0.65178625 | 6.84E-08 | 0.00124776 | 0.538 | 0.143 |
| EPS8     | 10 | 0.65136687 | 1.74E-10 | 3.18E-06   | 0.572 | 0.071 |
| PPFIBP1  | 10 | 0.64481063 | 9.82E-08 | 0.00179109 | 0.655 | 0.321 |
| EIF1     | 10 | 0.64420876 | 3.31E-19 | 6.04E-15   | 1     | 1     |
| SLC7A2   | 10 | 0.64096143 | 1.39E-08 | 0.00025401 | 0.483 | 0.054 |
| XBP1     | 10 | 0.63807739 | 1.09E-07 | 0.00198454 | 0.745 | 0.446 |
| HLA-DRB1 | 10 | 0.62101459 | 1.51E-08 | 0.00027639 | 0.572 | 0.143 |
| GRB10    | 10 | 0.61869479 | 1.43E-08 | 0.0002614  | 0.441 | 0.018 |
| DNAJB1   | 10 | 0.6137556  | 1.18E-06 | 0.02154589 | 0.428 | 0.071 |
| RNF114   | 10 | 0.60553783 | 1.19E-08 | 0.00021663 | 0.745 | 0.375 |
| ZNF593   | 10 | 0.60342589 | 3.97E-09 | 7.25E-05   | 0.697 | 0.25  |
| HMGA2    | 10 | 0.60299608 | 2.83E-11 | 5.16E-07   | 0.524 | 0     |
| COX17    | 10 | 0.60248601 | 5.11E-10 | 9.32E-06   | 0.89  | 0.554 |
| SLC3A2   | 10 | 0.60074852 | 6.67E-08 | 0.00121645 | 0.607 | 0.196 |
| SGIP1    | 10 | 0.59764673 | 3.44E-08 | 0.00062759 | 0.448 | 0.036 |
| ENO1     | 10 | 0.59435961 | 2.11E-07 | 0.00385023 | 0.993 | 0.964 |
| PHLDA1   | 10 | 0.59281534 | 5.23E-07 | 0.00954034 | 0.372 | 0.018 |
| ZNF385D  | 10 | 0.59259282 | 7.01E-09 | 0.00012782 | 0.834 | 0.482 |
| AK2      | 10 | 0.59122515 | 3.20E-08 | 0.00058302 | 0.807 | 0.446 |
| TGM2     | 10 | 0.57726661 | 2.95E-08 | 0.00053837 | 0.593 | 0.179 |
| EIF1B    | 10 | 0.5767425  | 1.47E-09 | 2.68E-05   | 0.89  | 0.554 |
| ATP6V1G1 | 10 | 0.57397274 | 6.08E-11 | 1.11E-06   | 1     | 0.946 |
| PPP1R14C | 10 | 0.56412404 | 2.23E-08 | 0.00040736 | 0.455 | 0.036 |
| PTGES3   | 10 | 0.56390443 | 1.41E-09 | 2.57E-05   | 0.979 | 0.964 |
| VDAC1    | 10 | 0.56120603 | 6.56E-08 | 0.00119702 | 0.952 | 0.661 |
| TREM1    | 10 | 0.55852627 | 3.02E-08 | 0.00055085 | 0.428 | 0.018 |
| NPR3     | 10 | 0.55269535 | 5.80E-07 | 0.01057445 | 0.345 | 0     |
| FAM162A  | 10 | 0.55112917 | 2.05E-07 | 0.00373794 | 0.938 | 0.661 |
| VIMP     | 10 | 0.54979259 | 4.08E-08 | 0.00074374 | 0.903 | 0.589 |
| ANXA5    | 10 | 0.54700196 | 7.57E-09 | 0.00013821 | 0.938 | 0.679 |
| TFPI     | 10 | 0.54683023 | 4.35E-08 | 0.00079441 | 0.421 | 0.018 |
| WDR45B   | 10 | 0.54065737 | 3.99E-07 | 0.00728572 | 0.524 | 0.143 |
| PLAUR    | 10 | 0.54027283 | 8.80E-07 | 0.01606336 | 0.462 | 0.089 |
| NBPF14   | 10 | 0.53825466 | 9.21E-08 | 0.00167996 | 0.503 | 0.107 |
| SVIP     | 10 | 0.53796754 | 5.78E-07 | 0.0105547  | 0.641 | 0.268 |

|            |    |            |          |            |       |       |
|------------|----|------------|----------|------------|-------|-------|
| GADD45GIP1 | 10 | 0.53699644 | 1.64E-08 | 0.00029927 | 0.862 | 0.5   |
| CISD2      | 10 | 0.53451303 | 1.10E-08 | 0.00020009 | 0.676 | 0.268 |
| TMEM38B    | 10 | 0.53335238 | 3.89E-08 | 0.00071026 | 0.745 | 0.393 |
| TRMT112    | 10 | 0.52261789 | 3.03E-08 | 0.00055213 | 0.966 | 0.804 |
| LRRFIP1    | 10 | 0.5191044  | 1.53E-06 | 0.02789329 | 0.593 | 0.25  |
| EIF4A2     | 10 | 0.51478886 | 1.88E-12 | 3.43E-08   | 1     | 1     |
| TVP23B     | 10 | 0.51035202 | 1.80E-07 | 0.00327954 | 0.572 | 0.179 |
| CDC37L1    | 10 | 0.50852413 | 2.16E-06 | 0.03934515 | 0.586 | 0.25  |
| EVI2A      | 10 | 0.50273491 | 6.30E-08 | 0.0011499  | 0.414 | 0.018 |
| CD44       | 10 | 0.49862812 | 1.68E-06 | 0.0306428  | 0.862 | 0.607 |
| PFKP       | 10 | 0.49463154 | 7.28E-08 | 0.0013281  | 0.538 | 0.107 |
| PPP1R2     | 10 | 0.48972055 | 1.47E-07 | 0.00268371 | 0.621 | 0.232 |
| NDUFB8     | 10 | 0.48210055 | 1.47E-06 | 0.02687554 | 0.897 | 0.661 |
| GPRC5A     | 10 | 0.46824873 | 4.79E-07 | 0.00874318 | 0.421 | 0.054 |
| BTG3       | 10 | 0.46794284 | 5.08E-07 | 0.00927559 | 0.552 | 0.179 |
| EIF5       | 10 | 0.46770213 | 8.73E-08 | 0.00159304 | 0.814 | 0.482 |
| DDX21      | 10 | 0.46770213 | 5.50E-08 | 0.00100296 | 0.483 | 0.071 |
| GPX1       | 10 | 0.46606748 | 1.08E-06 | 0.01974146 | 0.917 | 0.75  |
| FAP        | 10 | 0.46463849 | 1.46E-07 | 0.00266703 | 0.421 | 0.036 |
| SAP18      | 10 | 0.46454411 | 2.50E-07 | 0.00456198 | 0.917 | 0.643 |
| BNIP3      | 10 | 0.45989874 | 5.99E-08 | 0.00109341 | 0.986 | 1     |
| SH3BGRL3   | 10 | 0.45368801 | 4.71E-08 | 0.0008598  | 0.986 | 0.964 |
| SNRPG      | 10 | 0.44652684 | 2.00E-06 | 0.03653731 | 0.848 | 0.571 |
| NXT1       | 10 | 0.44638471 | 2.14E-06 | 0.03896792 | 0.497 | 0.143 |
| RNF126     | 10 | 0.44335118 | 7.33E-07 | 0.01338391 | 0.414 | 0.054 |
| SQSTM1     | 10 | 0.44242711 | 8.31E-07 | 0.0151688  | 0.972 | 0.893 |
| SPHK1      | 10 | 0.43928868 | 1.44E-06 | 0.02628959 | 0.352 | 0.018 |
| COX7A2     | 10 | 0.43287772 | 1.81E-09 | 3.31E-05   | 0.979 | 0.964 |
| CCDC59     | 10 | 0.42148929 | 2.57E-06 | 0.04692614 | 0.621 | 0.268 |
| ATP6V0E1   | 10 | 0.41945605 | 1.57E-06 | 0.02867889 | 0.952 | 0.786 |
| CSNK2A2    | 10 | 0.41001476 | 2.50E-06 | 0.04556257 | 0.434 | 0.089 |
| TBCA       | 10 | 0.40165509 | 4.76E-08 | 0.00086936 | 1     | 1     |
| OAZ1       | 10 | 0.37306765 | 8.87E-08 | 0.0016184  | 1     | 0.982 |
| AC090498.1 | 10 | 0.36360328 | 2.94E-12 | 5.36E-08   | 1     | 1     |
| ZFHX4      | 10 | -0.2515008 | 6.85E-07 | 0.01250387 | 0.028 | 0.25  |
| RPL39      | 10 | -0.2534405 | 3.75E-09 | 6.85E-05   | 1     | 1     |
| UBA52      | 10 | -0.2543924 | 1.70E-07 | 0.00310928 | 1     | 1     |
| MKX        | 10 | -0.2582349 | 9.94E-07 | 0.01814199 | 0.069 | 0.339 |
| RPL18A     | 10 | -0.2598134 | 1.84E-09 | 3.36E-05   | 1     | 1     |

|               |    |            |          |            |       |       |
|---------------|----|------------|----------|------------|-------|-------|
| SPTLC3        | 10 | -0.2646658 | 2.41E-07 | 0.0043922  | 0.069 | 0.357 |
| RP11-71N10.1  | 10 | -0.2651078 | 1.01E-08 | 0.00018464 | 0     | 0.214 |
| RP11-798M19.6 | 10 | -0.2700693 | 2.66E-06 | 0.04855226 | 0.11  | 0.411 |
| RPL7A         | 10 | -0.2755897 | 4.54E-08 | 0.00082795 | 1     | 1     |
| RPS7          | 10 | -0.2772108 | 9.06E-08 | 0.00165403 | 1     | 1     |
| CLDN11        | 10 | -0.2784376 | 2.78E-08 | 0.00050775 | 0.014 | 0.25  |
| HOXB8         | 10 | -0.2784376 | 1.25E-07 | 0.00228638 | 0.014 | 0.232 |
| RPSA          | 10 | -0.2830149 | 6.55E-07 | 0.01194323 | 1     | 1     |
| RPL11         | 10 | -0.286462  | 4.34E-11 | 7.92E-07   | 1     | 1     |
| DPYSL3        | 10 | -0.2950488 | 8.31E-08 | 0.00151648 | 0.076 | 0.393 |
| HACD4         | 10 | -0.2964561 | 1.93E-08 | 0.0003522  | 0.062 | 0.375 |
| RPL30         | 10 | -0.2988511 | 2.93E-09 | 5.35E-05   | 1     | 1     |
| RPL13         | 10 | -0.3016178 | 3.24E-13 | 5.91E-09   | 1     | 1     |
| RPS3          | 10 | -0.3021244 | 1.54E-12 | 2.82E-08   | 1     | 1     |
| RPLP1         | 10 | -0.3076872 | 1.58E-14 | 2.89E-10   | 1     | 1     |
| CA11          | 10 | -0.3161288 | 7.89E-09 | 0.00014394 | 0.041 | 0.339 |
| NKX3-2        | 10 | -0.3184537 | 4.98E-10 | 9.10E-06   | 0     | 0.25  |
| RPS17         | 10 | -0.322106  | 5.45E-11 | 9.95E-07   | 1     | 1     |
| MAGEF1        | 10 | -0.32354   | 3.25E-07 | 0.00592825 | 0.097 | 0.411 |
| AFF3          | 10 | -0.3244843 | 1.89E-08 | 0.00034539 | 0.007 | 0.232 |
| RPL6          | 10 | -0.3248356 | 4.59E-10 | 8.37E-06   | 1     | 1     |
| PPP1R16A      | 10 | -0.3251291 | 1.23E-07 | 0.00225272 | 0.083 | 0.393 |
| SNHG19        | 10 | -0.3251291 | 4.95E-07 | 0.00903493 | 0.083 | 0.375 |
| SNHG18        | 10 | -0.3256762 | 4.89E-07 | 0.00892733 | 0.159 | 0.5   |
| RPS18         | 10 | -0.3268084 | 8.25E-13 | 1.51E-08   | 1     | 1     |
| BTG2          | 10 | -0.3285514 | 1.70E-09 | 3.10E-05   | 0.041 | 0.357 |
| RPL23         | 10 | -0.3287487 | 1.23E-08 | 0.00022409 | 1     | 1     |
| RPS29         | 10 | -0.3302084 | 3.48E-11 | 6.35E-07   | 1     | 1     |
| ENAH          | 10 | -0.3305555 | 7.51E-08 | 0.00136985 | 0.09  | 0.411 |
| RP11-553L6.5  | 10 | -0.3331979 | 1.31E-06 | 0.02397962 | 0.138 | 0.446 |
| RPL14         | 10 | -0.3338939 | 2.29E-12 | 4.18E-08   | 1     | 1     |
| RP5-1097P24.1 | 10 | -0.3342208 | 3.42E-07 | 0.00624692 | 0.048 | 0.304 |
| NPM1          | 10 | -0.3388793 | 3.41E-07 | 0.00622947 | 1     | 1     |
| RPS13         | 10 | -0.3425035 | 1.27E-09 | 2.32E-05   | 1     | 1     |
| AC005152.3    | 10 | -0.3440962 | 2.32E-11 | 4.23E-07   | 0     | 0.286 |
| RPL8          | 10 | -0.3446407 | 6.43E-14 | 1.17E-09   | 1     | 1     |
| RP11-983P16.4 | 10 | -0.3462036 | 1.80E-06 | 0.03284803 | 0.166 | 0.482 |
| RPL9          | 10 | -0.3465573 | 2.23E-10 | 4.06E-06   | 1     | 1     |
| RPL5          | 10 | -0.3480441 | 3.18E-11 | 5.80E-07   | 1     | 1     |

|          |    |            |          |            |       |       |
|----------|----|------------|----------|------------|-------|-------|
| EIF3K    | 10 | -0.3482105 | 1.62E-06 | 0.0295586  | 0.766 | 0.982 |
| RPL15    | 10 | -0.349786  | 1.26E-17 | 2.30E-13   | 1     | 1     |
| CPQ      | 10 | -0.3513253 | 5.19E-07 | 0.00946726 | 0.117 | 0.429 |
| RPS5     | 10 | -0.3538077 | 8.74E-14 | 1.59E-09   | 1     | 1     |
| GSTA4    | 10 | -0.3577645 | 1.47E-06 | 0.02688702 | 0.159 | 0.464 |
| CCDC8    | 10 | -0.3595874 | 9.46E-09 | 0.00017264 | 0.028 | 0.304 |
| KDEL3    | 10 | -0.3598147 | 1.04E-07 | 0.00189408 | 0.083 | 0.393 |
| H1FX     | 10 | -0.3598147 | 1.12E-06 | 0.0204899  | 0.083 | 0.357 |
| RPS4X    | 10 | -0.3599019 | 2.82E-13 | 5.15E-09   | 1     | 1     |
| CCDC102B | 10 | -0.360889  | 3.63E-10 | 6.63E-06   | 0.021 | 0.321 |
| RPS9     | 10 | -0.3613791 | 1.09E-14 | 1.99E-10   | 1     | 1     |
| ANGPTL5  | 10 | -0.3648446 | 1.73E-07 | 0.00315325 | 0.09  | 0.393 |
| RPS6     | 10 | -0.3663867 | 1.46E-16 | 2.66E-12   | 1     | 1     |
| RPS23    | 10 | -0.3673468 | 2.53E-14 | 4.61E-10   | 1     | 1     |
| LRR2     | 10 | -0.3687767 | 7.27E-07 | 0.01327062 | 0.062 | 0.321 |
| C17orf89 | 10 | -0.3689004 | 1.91E-06 | 0.03490555 | 0.234 | 0.571 |
| RPS16    | 10 | -0.3711294 | 8.39E-12 | 1.53E-07   | 1     | 1     |
| PDGFRA   | 10 | -0.3724731 | 4.64E-08 | 0.00084726 | 0.069 | 0.375 |
| PYCARD   | 10 | -0.3733042 | 3.27E-07 | 0.00596477 | 0.103 | 0.411 |
| TOMM7    | 10 | -0.3742764 | 5.25E-12 | 9.58E-08   | 1     | 1     |
| SOCS3    | 10 | -0.3746452 | 2.06E-06 | 0.03760608 | 0.097 | 0.375 |
| RPL13A   | 10 | -0.3747202 | 3.94E-17 | 7.19E-13   | 1     | 1     |
| ERGIC3   | 10 | -0.3750568 | 6.25E-07 | 0.01140902 | 0.69  | 0.946 |
| TMEM98   | 10 | -0.3753602 | 1.67E-06 | 0.03050888 | 0.145 | 0.446 |
| RPL10    | 10 | -0.3764008 | 3.81E-19 | 6.94E-15   | 1     | 1     |
| RPS4Y1   | 10 | -0.3782781 | 4.82E-09 | 8.79E-05   | 0.993 | 1     |
| ABHD14A  | 10 | -0.383398  | 6.60E-09 | 0.00012044 | 0.034 | 0.321 |
| FGF7     | 10 | -0.3837726 | 5.63E-07 | 0.01027357 | 0.069 | 0.339 |
| RBM3     | 10 | -0.3894271 | 1.29E-06 | 0.0234706  | 0.352 | 0.714 |
| PIGP     | 10 | -0.3907241 | 1.15E-06 | 0.02092395 | 0.441 | 0.768 |
| RPLP2    | 10 | -0.3914107 | 2.86E-16 | 5.22E-12   | 1     | 1     |
| DNM3OS   | 10 | -0.3948104 | 2.82E-07 | 0.00513902 | 0.103 | 0.411 |
| 01-Sep   | 10 | -0.3965933 | 2.36E-10 | 4.30E-06   | 0.062 | 0.429 |
| EIF2A    | 10 | -0.3973064 | 1.19E-06 | 0.02167373 | 0.614 | 0.857 |
| SPON2    | 10 | -0.3982809 | 1.33E-09 | 2.44E-05   | 0.048 | 0.375 |
| ILF3-AS1 | 10 | -0.4002051 | 7.13E-07 | 0.01301493 | 0.193 | 0.518 |
| RPL18    | 10 | -0.4021146 | 1.02E-11 | 1.87E-07   | 1     | 1     |
| SEPP1    | 10 | -0.4021291 | 1.68E-07 | 0.00306037 | 0.138 | 0.464 |
| RPS2     | 10 | -0.4023099 | 1.16E-15 | 2.11E-11   | 1     | 1     |

|            |    |            |          |            |       |       |
|------------|----|------------|----------|------------|-------|-------|
| ANKRD35    | 10 | -0.4048383 | 1.23E-11 | 2.25E-07   | 0.048 | 0.429 |
| DMKN       | 10 | -0.4048383 | 3.93E-07 | 0.00717687 | 0.159 | 0.482 |
| ST13       | 10 | -0.4068293 | 3.38E-09 | 6.17E-05   | 0.945 | 1     |
| AC003090.1 | 10 | -0.4085171 | 3.03E-10 | 5.52E-06   | 0.021 | 0.321 |
| EIF3E      | 10 | -0.410195  | 6.50E-09 | 0.00011858 | 1     | 1     |
| NAP1L1     | 10 | -0.4102928 | 1.58E-08 | 0.00028806 | 0.945 | 0.982 |
| DBP        | 10 | -0.4105756 | 8.43E-11 | 1.54E-06   | 0.083 | 0.482 |
| PLPP1      | 10 | -0.4123856 | 6.18E-08 | 0.00112739 | 0.138 | 0.482 |
| RPS27A     | 10 | -0.4151757 | 4.90E-18 | 8.94E-14   | 1     | 1     |
| CTGF       | 10 | -0.4162391 | 7.55E-08 | 0.00137784 | 0.207 | 0.607 |
| MIR99AHG   | 10 | -0.4207538 | 5.52E-09 | 0.00010065 | 0.048 | 0.357 |
| PRKCZ      | 10 | -0.4257139 | 1.74E-07 | 0.00316752 | 0.2   | 0.554 |
| RPL19      | 10 | -0.4268144 | 7.17E-20 | 1.31E-15   | 1     | 1     |
| RABAC1     | 10 | -0.4302471 | 2.43E-07 | 0.00442584 | 0.662 | 0.946 |
| SPINT2     | 10 | -0.4315066 | 1.44E-06 | 0.02635542 | 0.221 | 0.536 |
| BTF3       | 10 | -0.4356476 | 1.55E-12 | 2.84E-08   | 0.993 | 1     |
| TSPO       | 10 | -0.4395043 | 8.05E-08 | 0.00146832 | 0.614 | 0.929 |
| BGN        | 10 | -0.4405564 | 1.99E-07 | 0.00362294 | 0.966 | 1     |
| PNKD       | 10 | -0.4405564 | 1.31E-08 | 0.00023917 | 0.172 | 0.554 |
| ATPIF1     | 10 | -0.4496297 | 1.81E-07 | 0.00330474 | 0.455 | 0.804 |
| RPL3       | 10 | -0.450594  | 4.24E-17 | 7.73E-13   | 1     | 1     |
| NDUFA11    | 10 | -0.4537269 | 1.01E-07 | 0.00184319 | 0.71  | 0.929 |
| COL11A2    | 10 | -0.4598722 | 3.62E-08 | 0.00066044 | 0.193 | 0.589 |
| MYLK       | 10 | -0.460101  | 3.12E-13 | 5.69E-09   | 0.028 | 0.429 |
| RPL23A     | 10 | -0.4604567 | 1.06E-19 | 1.94E-15   | 1     | 1     |
| SSR4       | 10 | -0.4616237 | 7.50E-08 | 0.00136883 | 0.89  | 0.982 |
| EEF1B2     | 10 | -0.4632048 | 4.17E-12 | 7.61E-08   | 0.986 | 1     |
| PRDX4      | 10 | -0.4658742 | 2.17E-07 | 0.00396226 | 0.545 | 0.821 |
| CHID1      | 10 | -0.4683587 | 4.86E-07 | 0.0088682  | 0.276 | 0.607 |
| PPP1R3C    | 10 | -0.4690579 | 8.89E-08 | 0.00162257 | 0.248 | 0.625 |
| MPP6       | 10 | -0.4754437 | 1.44E-08 | 0.0002635  | 0.145 | 0.5   |
| FTL        | 10 | -0.4758201 | 1.59E-11 | 2.90E-07   | 1     | 1     |
| HDLBP      | 10 | -0.4804023 | 8.18E-09 | 0.00014934 | 0.31  | 0.696 |
| PRCP       | 10 | -0.4879791 | 1.66E-13 | 3.03E-09   | 0.034 | 0.446 |
| SDF4       | 10 | -0.4882513 | 9.11E-07 | 0.01663111 | 0.386 | 0.714 |
| VKORC1     | 10 | -0.4905109 | 1.13E-10 | 2.06E-06   | 0.855 | 0.982 |
| HIST1H4C   | 10 | -0.4932732 | 1.12E-08 | 0.00020444 | 0.338 | 0.75  |
| RPL34      | 10 | -0.4940854 | 4.30E-20 | 7.85E-16   | 1     | 1     |
| FTH1       | 10 | -0.4961562 | 2.23E-11 | 4.07E-07   | 1     | 1     |

|          |    |            |          |            |       |       |
|----------|----|------------|----------|------------|-------|-------|
| ATRN1    | 10 | -0.5003064 | 6.08E-11 | 1.11E-06   | 0.076 | 0.464 |
| YBX1     | 10 | -0.5027177 | 1.20E-11 | 2.20E-07   | 0.972 | 0.982 |
| PCOLCE2  | 10 | -0.5047987 | 7.80E-09 | 0.00014231 | 0.71  | 1     |
| FCGRT    | 10 | -0.5047987 | 3.05E-08 | 0.0005565  | 0.331 | 0.696 |
| PLXDC2   | 10 | -0.506071  | 1.45E-08 | 0.00026478 | 0.276 | 0.643 |
| IGFBP6   | 10 | -0.5065418 | 2.26E-06 | 0.04131048 | 0.428 | 0.75  |
| RPS3A    | 10 | -0.5086969 | 2.30E-19 | 4.20E-15   | 1     | 1     |
| PCBP2    | 10 | -0.5097956 | 6.33E-11 | 1.15E-06   | 0.855 | 1     |
| AHNAK    | 10 | -0.5114308 | 3.50E-09 | 6.38E-05   | 0.186 | 0.571 |
| TPT1     | 10 | -0.5153335 | 4.32E-17 | 7.89E-13   | 1     | 1     |
| H3F3A    | 10 | -0.5169788 | 1.21E-09 | 2.21E-05   | 0.924 | 1     |
| ZBTB20   | 10 | -0.5243445 | 2.23E-08 | 0.00040717 | 0.131 | 0.464 |
| TCEA3    | 10 | -0.5254783 | 2.93E-11 | 5.35E-07   | 0.159 | 0.607 |
| ARHGAP29 | 10 | -0.5304128 | 1.27E-07 | 0.00232231 | 0.241 | 0.589 |
| ITM2C    | 10 | -0.5378197 | 1.78E-08 | 0.00032538 | 0.2   | 0.589 |
| ENPP1    | 10 | -0.5459169 | 2.12E-13 | 3.87E-09   | 0.076 | 0.536 |
| TRPS1    | 10 | -0.5459169 | 2.52E-09 | 4.60E-05   | 0.234 | 0.625 |
| SSPN     | 10 | -0.5490371 | 2.11E-12 | 3.85E-08   | 0.09  | 0.536 |
| CTSC     | 10 | -0.5554864 | 7.60E-08 | 0.00138633 | 0.062 | 0.357 |
| XAGE2    | 10 | -0.5596158 | 1.02E-08 | 0.00018618 | 0     | 0.214 |
| SSR3     | 10 | -0.5659845 | 1.69E-09 | 3.08E-05   | 0.828 | 0.982 |
| ITM2A    | 10 | -0.5663258 | 2.84E-08 | 0.00051847 | 0.248 | 0.607 |
| PDIA6    | 10 | -0.5701739 | 5.30E-08 | 0.00096712 | 0.338 | 0.714 |
| BRK1     | 10 | -0.5714502 | 4.84E-11 | 8.83E-07   | 0.662 | 0.982 |
| NFIA     | 10 | -0.5728244 | 1.32E-12 | 2.40E-08   | 0.124 | 0.589 |
| PTRF     | 10 | -0.573873  | 3.42E-09 | 6.25E-05   | 0.248 | 0.661 |
| SUMF2    | 10 | -0.5740878 | 1.05E-06 | 0.01924953 | 0.441 | 0.732 |
| VIM      | 10 | -0.5849747 | 5.45E-12 | 9.95E-08   | 1     | 1     |
| MDFI     | 10 | -0.5878079 | 6.25E-09 | 0.00011407 | 0.241 | 0.607 |
| HMG2     | 10 | -0.5887806 | 1.01E-09 | 1.84E-05   | 0.766 | 0.946 |
| CXXC5    | 10 | -0.5892674 | 9.58E-12 | 1.75E-07   | 0.09  | 0.5   |
| SLC44A1  | 10 | -0.5913793 | 3.05E-12 | 5.56E-08   | 0.159 | 0.625 |
| HLA-A    | 10 | -0.5958616 | 4.00E-08 | 0.00073019 | 0.738 | 0.964 |
| EID1     | 10 | -0.5959818 | 1.36E-13 | 2.48E-09   | 0.862 | 0.982 |
| RPL7     | 10 | -0.5963637 | 1.44E-19 | 2.63E-15   | 1     | 1     |
| RPLP0    | 10 | -0.5978305 | 2.80E-23 | 5.11E-19   | 1     | 1     |
| S100A4   | 10 | -0.6080487 | 1.04E-07 | 0.00190045 | 0.497 | 0.875 |
| IGFBP7   | 10 | -0.6083308 | 1.22E-06 | 0.02217088 | 0.676 | 0.893 |
| BHLHE41  | 10 | -0.611222  | 1.23E-10 | 2.24E-06   | 0.124 | 0.518 |

|          |    |            |          |          |       |       |
|----------|----|------------|----------|----------|-------|-------|
| TXNIP    | 10 | -0.6121663 | 9.53E-10 | 1.74E-05 | 0.007 | 0.268 |
| S100A13  | 10 | -0.6142713 | 5.97E-15 | 1.09E-10 | 0.979 | 1     |
| EIF3L    | 10 | -0.6182939 | 2.94E-11 | 5.37E-07 | 0.766 | 0.982 |
| SLC14A1  | 10 | -0.618372  | 4.66E-12 | 8.51E-08 | 0.172 | 0.625 |
| PTMS     | 10 | -0.6340242 | 2.99E-09 | 5.45E-05 | 0.372 | 0.732 |
| MIA      | 10 | -0.636731  | 3.30E-11 | 6.02E-07 | 0.931 | 1     |
| CUTA     | 10 | -0.638242  | 3.50E-14 | 6.39E-10 | 0.634 | 0.946 |
| THY1     | 10 | -0.6412271 | 3.80E-13 | 6.94E-09 | 0.131 | 0.607 |
| CCDC80   | 10 | -0.6439782 | 3.14E-09 | 5.72E-05 | 0.676 | 0.946 |
| S100A1   | 10 | -0.6450824 | 2.19E-12 | 3.99E-08 | 1     | 1     |
| INHBA    | 10 | -0.6460004 | 5.35E-11 | 9.76E-07 | 0.131 | 0.554 |
| APOD     | 10 | -0.6484325 | 1.72E-10 | 3.13E-06 | 0.145 | 0.571 |
| PEBP1    | 10 | -0.6511212 | 1.07E-11 | 1.96E-07 | 0.634 | 0.929 |
| HSP90AB1 | 10 | -0.6524816 | 2.81E-13 | 5.12E-09 | 0.986 | 1     |
| RPS20    | 10 | -0.6530461 | 1.42E-21 | 2.60E-17 | 1     | 1     |
| CCNI     | 10 | -0.6544454 | 3.70E-17 | 6.76E-13 | 1     | 1     |
| GAS6     | 10 | -0.6637    | 1.02E-14 | 1.86E-10 | 0.131 | 0.643 |
| HTRA1    | 10 | -0.6656474 | 1.08E-11 | 1.97E-07 | 0.524 | 0.929 |
| RPS8     | 10 | -0.6664253 | 1.95E-23 | 3.57E-19 | 1     | 1     |
| VCAN     | 10 | -0.6872305 | 1.53E-12 | 2.79E-08 | 0.11  | 0.571 |
| NPC2     | 10 | -0.6915745 | 2.53E-17 | 4.62E-13 | 0.938 | 1     |
| RPL10A   | 10 | -0.6996296 | 1.82E-23 | 3.32E-19 | 1     | 1     |
| RPL4     | 10 | -0.7147178 | 2.41E-21 | 4.40E-17 | 0.993 | 1     |
| RPS11    | 10 | -0.7183748 | 8.06E-21 | 1.47E-16 | 0.979 | 1     |
| ID4      | 10 | -0.7216667 | 1.81E-11 | 3.31E-07 | 0.31  | 0.786 |
| FBXO2    | 10 | -0.7219236 | 1.66E-13 | 3.02E-09 | 0.559 | 0.964 |
| SERPINA5 | 10 | -0.7225405 | 8.11E-13 | 1.48E-08 | 0.172 | 0.643 |
| SPARC    | 10 | -0.737808  | 4.96E-14 | 9.05E-10 | 0.186 | 0.714 |
| CRTAP    | 10 | -0.7413678 | 6.45E-16 | 1.18E-11 | 0.421 | 0.893 |
| NNMT     | 10 | -0.7433815 | 5.69E-10 | 1.04E-05 | 0.717 | 0.982 |
| PABPC1   | 10 | -0.7495827 | 5.91E-14 | 1.08E-09 | 0.731 | 0.982 |
| MT-ND4   | 10 | -0.7512228 | 6.74E-11 | 1.23E-06 | 0.91  | 1     |
| COL9A3   | 10 | -0.7532682 | 1.09E-13 | 1.99E-09 | 0.241 | 0.786 |
| HNRNPA1  | 10 | -0.7549758 | 4.85E-20 | 8.85E-16 | 0.979 | 1     |
| JUNB     | 10 | -0.7666479 | 2.21E-11 | 4.03E-07 | 0.352 | 0.821 |
| YBX3     | 10 | -0.7734706 | 1.10E-15 | 2.01E-11 | 0.655 | 0.964 |
| GOLIM4   | 10 | -0.7754914 | 7.19E-15 | 1.31E-10 | 0.717 | 0.964 |
| CRISPLD1 | 10 | -0.7868327 | 2.22E-21 | 4.06E-17 | 0     | 0.536 |
| ID2      | 10 | -0.7956798 | 2.02E-10 | 3.69E-06 | 0.303 | 0.714 |

|         |    |            |          |          |       |       |
|---------|----|------------|----------|----------|-------|-------|
| MALAT1  | 10 | -0.7959471 | 1.62E-15 | 2.96E-11 | 1     | 1     |
| SNAI2   | 10 | -0.7964336 | 1.75E-11 | 3.20E-07 | 0.276 | 0.732 |
| S100B   | 10 | -0.803408  | 4.15E-15 | 7.57E-11 | 0.462 | 0.946 |
| SLC40A1 | 10 | -0.8072482 | 9.68E-17 | 1.77E-12 | 0.028 | 0.5   |
| TCF4    | 10 | -0.8082812 | 3.02E-14 | 5.52E-10 | 0.221 | 0.696 |
| CD99    | 10 | -0.8171325 | 2.83E-14 | 5.17E-10 | 0.786 | 0.982 |
| DDR2    | 10 | -0.8280588 | 4.28E-13 | 7.82E-09 | 0.214 | 0.679 |
| P4HB    | 10 | -0.8305772 | 3.69E-14 | 6.74E-10 | 0.51  | 0.929 |
| RHOBTB3 | 10 | -0.8421828 | 4.46E-15 | 8.14E-11 | 0.276 | 0.786 |
| COL11A1 | 10 | -0.8478414 | 6.73E-14 | 1.23E-09 | 0.372 | 0.875 |
| EEF1A1  | 10 | -0.8546167 | 1.13E-26 | 2.06E-22 | 1     | 1     |
| EIF3H   | 10 | -0.8549422 | 3.85E-21 | 7.03E-17 | 0.952 | 1     |
| RBP4    | 10 | -0.855154  | 1.41E-12 | 2.58E-08 | 0.338 | 0.804 |
| FOS     | 10 | -0.8575633 | 6.79E-16 | 1.24E-11 | 0.262 | 0.804 |
| FXVD6   | 10 | -0.8591181 | 3.67E-18 | 6.69E-14 | 0.572 | 0.982 |
| ISLR    | 10 | -0.8680004 | 8.80E-21 | 1.60E-16 | 0.034 | 0.607 |
| CST3    | 10 | -0.8786628 | 3.34E-16 | 6.10E-12 | 0.945 | 1     |
| CP      | 10 | -0.8844114 | 6.62E-18 | 1.21E-13 | 0.393 | 0.929 |
| DCN     | 10 | -0.9088061 | 4.31E-20 | 7.87E-16 | 1     | 1     |
| EEF2    | 10 | -0.9230931 | 7.79E-19 | 1.42E-14 | 0.986 | 1     |
| CYR61   | 10 | -0.940146  | 4.46E-12 | 8.14E-08 | 0.103 | 0.536 |
| C2orf40 | 10 | -0.9652786 | 4.98E-16 | 9.09E-12 | 0.945 | 1     |
| B2M     | 10 | -0.9662976 | 3.51E-19 | 6.40E-15 | 0.959 | 1     |
| NGFRAP1 | 10 | -0.9749919 | 6.26E-19 | 1.14E-14 | 0.545 | 0.982 |
| FMOD    | 10 | -0.9757405 | 8.14E-19 | 1.49E-14 | 0.621 | 0.982 |
| PRELP   | 10 | -0.9808961 | 1.08E-17 | 1.97E-13 | 0.676 | 0.982 |
| MT-ND3  | 10 | -0.9995314 | 4.45E-22 | 8.11E-18 | 0.255 | 0.964 |
| MT-CO3  | 10 | -1.0409942 | 3.82E-17 | 6.97E-13 | 0.814 | 1     |
| ID1     | 10 | -1.0571717 | 1.29E-14 | 2.36E-10 | 0.269 | 0.804 |
| MT-ND1  | 10 | -1.0647107 | 2.83E-18 | 5.16E-14 | 0.331 | 0.893 |
| MT-CO1  | 10 | -1.0649909 | 3.31E-16 | 6.04E-12 | 0.924 | 1     |
| MT-ND2  | 10 | -1.1389217 | 2.47E-19 | 4.50E-15 | 0.331 | 0.929 |
| ADIRF   | 10 | -1.1399732 | 3.82E-17 | 6.98E-13 | 0.269 | 0.857 |
| ACAN    | 10 | -1.140909  | 8.42E-19 | 1.54E-14 | 0.752 | 0.982 |
| ZFP36L2 | 10 | -1.1593826 | 6.62E-15 | 1.21E-10 | 0.159 | 0.661 |
| PAX1    | 10 | -1.1678684 | 2.68E-23 | 4.89E-19 | 0.31  | 0.946 |
| LECT1   | 10 | -1.1886513 | 3.00E-21 | 5.47E-17 | 0.31  | 0.964 |
| GPX3    | 10 | -1.190399  | 1.17E-21 | 2.13E-17 | 0.766 | 1     |
| C2orf82 | 10 | -1.2403605 | 2.30E-17 | 4.19E-13 | 0.945 | 0.982 |



| MT-ATP6 | 10      | -1.2486336 | 1.58E-19 | 2.89E-15   | 0.641 | 0.982 |
|---------|---------|------------|----------|------------|-------|-------|
| MT-CYB  | 10      | -1.2676516 | 1.29E-20 | 2.36E-16   | 0.421 | 0.964 |
| NEAT1   | 10      | -1.2696433 | 2.15E-23 | 3.92E-19   | 0.979 | 1     |
| MT-CO2  | 10      | -1.281732  | 1.69E-18 | 3.08E-14   | 0.855 | 1     |
| CAPS    | 10      | -1.2840878 | 7.16E-19 | 1.31E-14   | 0.462 | 0.946 |
| TSC22D1 | 10      | -1.3033185 | 3.69E-17 | 6.73E-13   | 0.421 | 0.893 |
| SLPI    | 10      | -1.3284582 | 1.01E-18 | 1.84E-14   | 0.71  | 1     |
| PLAC9   | 10      | -1.3313139 | 3.82E-24 | 6.98E-20   | 0.345 | 0.982 |
| MGP     | 10      | -1.4137439 | 1.65E-18 | 3.01E-14   | 0.993 | 1     |
| CITED2  | 10      | -1.4213857 | 2.89E-14 | 5.28E-10   | 0.152 | 0.643 |
| SPTSSB  | 10      | -1.4256868 | 2.28E-29 | 4.16E-25   | 0     | 0.714 |
| ID3     | 10      | -1.592039  | 2.50E-31 | 4.56E-27   | 0.11  | 0.946 |
| COL2A1  | 10      | -1.5998291 | 2.21E-26 | 4.03E-22   | 0.159 | 0.893 |
| FRZB    | 10      | -1.7994913 | 3.23E-25 | 5.90E-21   | 0.117 | 0.839 |
| CLEC3A  | 10      | -2.1071528 | 1.17E-37 | 2.13E-33   | 0.041 | 0.946 |
| OGN     | 10      | -2.2179229 | 1.24E-27 | 2.25E-23   | 0.559 | 1     |
| gene    | cluster | avg_logFC  | p_val    | p_val_adj  | pct.1 | pct.2 |
| SPP1    | 11      | 2.32285066 | 4.43E-20 | 8.09E-16   | 0.808 | 0.128 |
| SOD2    | 11      | 1.55849003 | 5.45E-20 | 9.95E-16   | 0.986 | 0.743 |
| COMP    | 11      | 1.33567376 | 4.94E-11 | 9.02E-07   | 0.822 | 0.56  |
| CXCL8   | 11      | 1.2508041  | 2.14E-06 | 0.03899892 | 0.192 | 0     |
| PRG4    | 11      | 1.12070387 | 3.36E-14 | 6.14E-10   | 0.479 | 0.018 |
| DNAJB9  | 11      | 1.08346949 | 1.75E-15 | 3.19E-11   | 0.932 | 0.679 |
| MT2A    | 11      | 1.08336918 | 6.09E-10 | 1.11E-05   | 1     | 1     |
| UPP1    | 11      | 1.005002   | 2.55E-15 | 4.65E-11   | 0.726 | 0.193 |
| WTAP    | 11      | 0.99125575 | 5.49E-16 | 1.00E-11   | 0.945 | 0.532 |
| CD55    | 11      | 0.97453408 | 9.92E-17 | 1.81E-12   | 0.89  | 0.468 |
| FN1     | 11      | 0.91785533 | 1.31E-09 | 2.39E-05   | 1     | 0.991 |
| SLC3A2  | 11      | 0.90893242 | 2.96E-12 | 5.40E-08   | 0.849 | 0.569 |
| ARF4    | 11      | 0.88639626 | 6.15E-17 | 1.12E-12   | 0.973 | 0.725 |
| VEGFA   | 11      | 0.81862364 | 9.67E-11 | 1.76E-06   | 0.616 | 0.202 |
| SMOX    | 11      | 0.79060519 | 3.29E-11 | 6.00E-07   | 0.589 | 0.156 |
| RABGGTB | 11      | 0.78775623 | 1.35E-13 | 2.46E-09   | 0.849 | 0.532 |
| MIF     | 11      | 0.78197311 | 1.53E-13 | 2.79E-09   | 1     | 1     |
| HMGA1   | 11      | 0.77726059 | 1.07E-08 | 0.00019605 | 0.658 | 0.312 |
| CTSL    | 11      | 0.77474821 | 8.42E-08 | 0.00153715 | 0.836 | 0.468 |
| SNHG12  | 11      | 0.76959265 | 3.99E-11 | 7.28E-07   | 0.712 | 0.275 |
| VIMP    | 11      | 0.74919514 | 2.08E-11 | 3.79E-07   | 0.973 | 0.807 |
| NRP2    | 11      | 0.74181503 | 5.91E-07 | 0.01078858 | 0.452 | 0.147 |

|          |    |            |          |            |       |       |
|----------|----|------------|----------|------------|-------|-------|
| ARF6     | 11 | 0.74056581 | 7.34E-13 | 1.34E-08   | 0.808 | 0.45  |
| TRMT112  | 11 | 0.69922781 | 1.15E-17 | 2.09E-13   | 1     | 0.917 |
| SELK     | 11 | 0.68784771 | 2.14E-08 | 0.00038998 | 0.945 | 0.826 |
| XBP1     | 11 | 0.68699198 | 4.64E-10 | 8.46E-06   | 0.932 | 0.798 |
| GOLT1B   | 11 | 0.68527562 | 1.11E-07 | 0.00203007 | 0.63  | 0.303 |
| TAF1D    | 11 | 0.68156278 | 3.50E-09 | 6.39E-05   | 0.753 | 0.44  |
| PTGS2    | 11 | 0.66325271 | 3.26E-10 | 5.95E-06   | 0.342 | 0.009 |
| BHLHE40  | 11 | 0.65070024 | 2.49E-06 | 0.04542386 | 0.548 | 0.257 |
| DDIT3    | 11 | 0.64656111 | 1.47E-08 | 0.00026791 | 0.945 | 0.807 |
| STK17A   | 11 | 0.64043803 | 4.99E-08 | 0.00091025 | 0.548 | 0.202 |
| NDRG1    | 11 | 0.61620927 | 2.74E-10 | 5.00E-06   | 0.712 | 0.312 |
| MGST1    | 11 | 0.61044315 | 6.33E-07 | 0.01155814 | 0.589 | 0.239 |
| SAR1A    | 11 | 0.60964325 | 2.38E-07 | 0.00435188 | 0.699 | 0.413 |
| VAPA     | 11 | 0.60538964 | 4.65E-13 | 8.48E-09   | 0.986 | 0.927 |
| ERO1A    | 11 | 0.59255586 | 1.48E-09 | 2.69E-05   | 0.63  | 0.22  |
| ZNF593   | 11 | 0.58629166 | 1.15E-09 | 2.11E-05   | 0.726 | 0.367 |
| GDF15    | 11 | 0.58321    | 1.42E-06 | 0.02599629 | 0.603 | 0.275 |
| WDR33    | 11 | 0.56073714 | 9.23E-10 | 1.68E-05   | 0.699 | 0.312 |
| GSTO1    | 11 | 0.5496337  | 7.29E-07 | 0.01330883 | 0.808 | 0.606 |
| RND3     | 11 | 0.54787063 | 1.53E-09 | 2.79E-05   | 0.411 | 0.046 |
| ADSS     | 11 | 0.54749192 | 4.10E-07 | 0.00747311 | 0.767 | 0.477 |
| RNF114   | 11 | 0.54320466 | 7.96E-10 | 1.45E-05   | 0.753 | 0.394 |
| CCND1    | 11 | 0.54097723 | 8.35E-07 | 0.01523366 | 0.438 | 0.128 |
| PMP22    | 11 | 0.53045943 | 1.64E-06 | 0.02993205 | 0.849 | 0.651 |
| NXT1     | 11 | 0.52730237 | 1.48E-07 | 0.00270147 | 0.589 | 0.257 |
| ENO2     | 11 | 0.52518616 | 1.08E-06 | 0.01979109 | 0.507 | 0.202 |
| GBE1     | 11 | 0.51680754 | 6.68E-07 | 0.01219579 | 0.726 | 0.459 |
| COPS2    | 11 | 0.51545501 | 3.78E-07 | 0.00689854 | 0.726 | 0.394 |
| C11orf96 | 11 | 0.51391183 | 1.91E-08 | 0.00034885 | 0.384 | 0.055 |
| OSER1    | 11 | 0.50962164 | 1.16E-07 | 0.00211094 | 0.63  | 0.294 |
| SPRY2    | 11 | 0.50952228 | 5.95E-07 | 0.01084881 | 0.411 | 0.11  |
| RELB     | 11 | 0.49852691 | 4.30E-09 | 7.84E-05   | 0.425 | 0.073 |
| TRAM1    | 11 | 0.49648356 | 6.33E-09 | 0.00011543 | 0.986 | 0.771 |
| BZW1     | 11 | 0.49572254 | 1.59E-07 | 0.00290008 | 0.753 | 0.422 |
| NOL7     | 11 | 0.48830038 | 2.52E-06 | 0.04598008 | 0.822 | 0.624 |
| CTHRC1   | 11 | 0.48358016 | 5.60E-09 | 0.00010223 | 0.397 | 0.055 |
| SYF2     | 11 | 0.47645805 | 1.43E-09 | 2.62E-05   | 0.986 | 0.752 |
| PLAUR    | 11 | 0.47611186 | 2.08E-06 | 0.03792303 | 0.411 | 0.11  |
| TGFBI    | 11 | 0.46542696 | 2.18E-07 | 0.00398074 | 0.397 | 0.092 |

|            |    |            |          |            |       |       |
|------------|----|------------|----------|------------|-------|-------|
| TREM1      | 11 | 0.46313075 | 3.16E-09 | 5.77E-05   | 0.288 | 0     |
| PTGES3     | 11 | 0.46057892 | 2.47E-09 | 4.51E-05   | 0.986 | 0.954 |
| EIF4A2     | 11 | 0.46031186 | 1.09E-07 | 0.00199227 | 0.973 | 0.936 |
| NAMPT      | 11 | 0.45972894 | 9.05E-07 | 0.01651527 | 0.685 | 0.33  |
| AK2        | 11 | 0.45688271 | 7.55E-07 | 0.01378247 | 0.767 | 0.523 |
| ZFAS1      | 11 | 0.44227366 | 8.73E-10 | 1.59E-05   | 1     | 0.991 |
| ZNF581     | 11 | 0.43597976 | 3.82E-08 | 0.00069646 | 0.616 | 0.239 |
| CCDC174    | 11 | 0.43052024 | 3.22E-08 | 0.00058724 | 0.562 | 0.183 |
| EIF1       | 11 | 0.43038762 | 2.48E-11 | 4.52E-07   | 1     | 1     |
| CLDND1     | 11 | 0.42136697 | 1.73E-06 | 0.03159824 | 0.603 | 0.284 |
| SLC7A2     | 11 | 0.41843275 | 1.70E-07 | 0.00309342 | 0.315 | 0.037 |
| ZFAND2A    | 11 | 0.41592632 | 2.55E-07 | 0.00465322 | 0.479 | 0.138 |
| CD44       | 11 | 0.40088844 | 1.96E-06 | 0.03580629 | 0.849 | 0.615 |
| AC090498.1 | 11 | 0.36375276 | 1.19E-10 | 2.17E-06   | 1     | 1     |
| HMGA2      | 11 | 0.35436843 | 2.93E-07 | 0.00534245 | 0.247 | 0.009 |
| C2orf49    | 11 | 0.35363556 | 4.67E-07 | 0.00851826 | 0.507 | 0.165 |
| FAP        | 11 | 0.32942948 | 1.49E-07 | 0.00271078 | 0.37  | 0.064 |
| EMC9       | 11 | 0.30953866 | 2.04E-06 | 0.03713938 | 0.452 | 0.138 |
| NPR3       | 11 | 0.27388875 | 8.68E-07 | 0.01584719 | 0.205 | 0     |
| RPL11      | 11 | -0.2546833 | 1.71E-07 | 0.00312917 | 1     | 1     |
| RPS29      | 11 | -0.2563402 | 9.95E-09 | 0.00018148 | 1     | 1     |
| RPL15      | 11 | -0.2616234 | 6.64E-10 | 1.21E-05   | 1     | 1     |
| RPS27A     | 11 | -0.2669315 | 1.69E-09 | 3.09E-05   | 1     | 1     |
| RPL37      | 11 | -0.2722409 | 1.61E-08 | 0.00029359 | 1     | 1     |
| RPLP1      | 11 | -0.2733152 | 4.32E-11 | 7.88E-07   | 1     | 1     |
| RPS4X      | 11 | -0.274206  | 6.07E-07 | 0.01108205 | 1     | 1     |
| RPL27      | 11 | -0.2765294 | 3.85E-07 | 0.00702141 | 1     | 1     |
| RPS23      | 11 | -0.2833168 | 1.96E-08 | 0.00035678 | 1     | 1     |
| COA5       | 11 | -0.2922587 | 1.62E-06 | 0.02962292 | 0.096 | 0.431 |
| SERF2      | 11 | -0.2984354 | 6.98E-07 | 0.01272849 | 1     | 1     |
| RPL13      | 11 | -0.3026666 | 1.41E-10 | 2.57E-06   | 1     | 1     |
| HOXB8      | 11 | -0.3120614 | 1.42E-06 | 0.02596714 | 0.027 | 0.321 |
| AC003090.1 | 11 | -0.3123263 | 1.03E-06 | 0.01877188 | 0.014 | 0.303 |
| RPS6       | 11 | -0.3129144 | 8.26E-12 | 1.51E-07   | 1     | 1     |
| RPS5       | 11 | -0.3261603 | 3.02E-09 | 5.52E-05   | 0.986 | 1     |
| RPS12      | 11 | -0.3271915 | 5.08E-10 | 9.28E-06   | 1     | 1     |
| RPS7       | 11 | -0.3352707 | 2.69E-10 | 4.92E-06   | 1     | 1     |
| RPL29      | 11 | -0.3359102 | 6.64E-12 | 1.21E-07   | 1     | 1     |
| RPL30      | 11 | -0.3381383 | 3.43E-11 | 6.26E-07   | 1     | 1     |

|             |    |            |          |            |       |       |
|-------------|----|------------|----------|------------|-------|-------|
| RPS16       | 11 | -0.3436451 | 2.06E-11 | 3.75E-07   | 1     | 1     |
| RPL18       | 11 | -0.3453238 | 2.25E-11 | 4.10E-07   | 1     | 1     |
| RPL23A      | 11 | -0.3472131 | 4.83E-11 | 8.82E-07   | 1     | 1     |
| RPL5        | 11 | -0.3484272 | 6.69E-09 | 0.00012209 | 1     | 1     |
| RPL34       | 11 | -0.3534426 | 2.50E-11 | 4.55E-07   | 1     | 1     |
| RPS18       | 11 | -0.3580359 | 3.54E-14 | 6.46E-10   | 1     | 1     |
| ZSCAN16-AS1 | 11 | -0.360467  | 7.82E-07 | 0.01426039 | 0.151 | 0.505 |
| TOMM7       | 11 | -0.3631428 | 4.16E-11 | 7.59E-07   | 1     | 1     |
| RPL37A      | 11 | -0.3631938 | 1.30E-13 | 2.37E-09   | 1     | 1     |
| SLC40A1     | 11 | -0.3639507 | 1.01E-06 | 0.01842724 | 0.014 | 0.303 |
| RNASSET2    | 11 | -0.3645794 | 2.25E-06 | 0.04096707 | 0.096 | 0.413 |
| RPLP2       | 11 | -0.3778194 | 2.17E-15 | 3.96E-11   | 1     | 1     |
| C17orf89    | 11 | -0.3788268 | 6.78E-07 | 0.01236406 | 0.26  | 0.606 |
| SSPN        | 11 | -0.380366  | 9.90E-07 | 0.01806173 | 0.041 | 0.349 |
| ERGIC3      | 11 | -0.3858413 | 3.84E-07 | 0.00700051 | 0.671 | 0.917 |
| EEF1B2      | 11 | -0.3890902 | 6.49E-08 | 0.00118444 | 0.973 | 0.991 |
| TMEM98      | 11 | -0.3898972 | 8.32E-08 | 0.00151882 | 0.068 | 0.431 |
| RPL9        | 11 | -0.3911161 | 2.17E-13 | 3.96E-09   | 1     | 1     |
| RPL6        | 11 | -0.3918776 | 2.43E-12 | 4.43E-08   | 1     | 1     |
| PPIA        | 11 | -0.3993845 | 2.15E-06 | 0.03929766 | 0.932 | 0.972 |
| HMGN3       | 11 | -0.4010616 | 2.65E-06 | 0.04828189 | 0.178 | 0.505 |
| DBP         | 11 | -0.4031594 | 1.13E-07 | 0.00206191 | 0.11  | 0.477 |
| LRP10       | 11 | -0.4055874 | 1.40E-06 | 0.02562998 | 0.342 | 0.67  |
| HNRNPM      | 11 | -0.4076749 | 9.27E-07 | 0.01691997 | 0.247 | 0.587 |
| RPS19       | 11 | -0.4087665 | 5.23E-14 | 9.54E-10   | 1     | 1     |
| ANAPC16     | 11 | -0.4094776 | 3.57E-07 | 0.00652061 | 0.753 | 0.899 |
| RPL3        | 11 | -0.4143481 | 1.20E-12 | 2.19E-08   | 1     | 1     |
| TUBB        | 11 | -0.4145161 | 1.58E-06 | 0.02890436 | 0.795 | 0.927 |
| PRDX4       | 11 | -0.4148611 | 5.76E-07 | 0.01051125 | 0.575 | 0.835 |
| FTL         | 11 | -0.4160959 | 2.62E-09 | 4.77E-05   | 1     | 1     |
| PCBP2       | 11 | -0.4187186 | 7.09E-08 | 0.00129438 | 0.74  | 0.936 |
| DYNLT1      | 11 | -0.4188914 | 8.43E-08 | 0.00153783 | 0.26  | 0.679 |
| GRN         | 11 | -0.4200921 | 1.16E-07 | 0.00211288 | 0.11  | 0.505 |
| TSPAN4      | 11 | -0.4217928 | 4.44E-07 | 0.00809805 | 0.205 | 0.578 |
| RPL19       | 11 | -0.4231321 | 1.07E-17 | 1.95E-13   | 1     | 1     |
| ARL6IP5     | 11 | -0.423287  | 1.37E-06 | 0.02498362 | 0.411 | 0.743 |
| IER2        | 11 | -0.4257901 | 1.95E-08 | 0.00035553 | 0.123 | 0.541 |
| AHNAK       | 11 | -0.4278042 | 2.29E-06 | 0.04173772 | 0.247 | 0.578 |
| IFI27L2     | 11 | -0.4285038 | 1.86E-06 | 0.03395798 | 0.589 | 0.844 |

|          |    |            |          |            |       |       |
|----------|----|------------|----------|------------|-------|-------|
| NUPR1    | 11 | -0.4309224 | 8.47E-07 | 0.01546223 | 1     | 0.991 |
| S100A1   | 11 | -0.4311535 | 8.99E-07 | 0.01640308 | 0.986 | 0.991 |
| RPS3A    | 11 | -0.4314642 | 1.54E-15 | 2.80E-11   | 1     | 1     |
| ZBTB20   | 11 | -0.4464094 | 3.16E-08 | 0.00057695 | 0.137 | 0.532 |
| MYL6     | 11 | -0.4464094 | 6.41E-07 | 0.01169947 | 0.822 | 0.954 |
| PRKCDBP  | 11 | -0.4478228 | 1.25E-06 | 0.02288459 | 0.329 | 0.661 |
| CRISPLD1 | 11 | -0.4501618 | 1.57E-06 | 0.02867612 | 0.041 | 0.339 |
| SH3BGRL  | 11 | -0.45116   | 2.06E-07 | 0.00374984 | 0.192 | 0.569 |
| PRDX5    | 11 | -0.4532481 | 1.66E-08 | 0.00030266 | 0.795 | 0.972 |
| RPSA     | 11 | -0.4538032 | 9.10E-12 | 1.66E-07   | 0.986 | 1     |
| RPS17    | 11 | -0.4667259 | 2.04E-16 | 3.72E-12   | 1     | 1     |
| VKORC1   | 11 | -0.4679671 | 5.38E-07 | 0.0098117  | 0.63  | 0.917 |
| ARHGAP29 | 11 | -0.4681494 | 5.47E-07 | 0.00998174 | 0.178 | 0.55  |
| RPS2     | 11 | -0.4713958 | 3.06E-16 | 5.58E-12   | 1     | 1     |
| GNAS     | 11 | -0.4732567 | 1.17E-08 | 0.00021265 | 0.466 | 0.826 |
| PCOLCE2  | 11 | -0.4793432 | 1.31E-07 | 0.00239831 | 0.699 | 0.936 |
| NDUFA11  | 11 | -0.4813257 | 3.98E-08 | 0.00072668 | 0.753 | 0.927 |
| RPL23    | 11 | -0.4887758 | 1.78E-12 | 3.25E-08   | 1     | 1     |
| NAP1L1   | 11 | -0.4911729 | 5.85E-09 | 0.00010671 | 0.945 | 0.982 |
| EIF3L    | 11 | -0.4922508 | 5.59E-10 | 1.02E-05   | 0.795 | 0.936 |
| ATPIF1   | 11 | -0.5055175 | 5.90E-09 | 0.00010767 | 0.479 | 0.789 |
| B2M      | 11 | -0.508631  | 3.17E-10 | 5.78E-06   | 0.986 | 1     |
| ARPC1A   | 11 | -0.5090665 | 5.07E-08 | 0.00092517 | 0.26  | 0.633 |
| SPON2    | 11 | -0.5127321 | 2.07E-06 | 0.03785205 | 0.027 | 0.312 |
| TSPO     | 11 | -0.5224363 | 5.37E-09 | 9.81E-05   | 0.658 | 0.917 |
| RPL7     | 11 | -0.5264141 | 6.82E-18 | 1.24E-13   | 1     | 1     |
| GAS6     | 11 | -0.5273785 | 1.63E-08 | 0.00029716 | 0.11  | 0.514 |
| CP       | 11 | -0.5327271 | 3.29E-08 | 0.00059988 | 0.247 | 0.661 |
| PPT1     | 11 | -0.5334208 | 2.48E-10 | 4.53E-06   | 0.178 | 0.642 |
| LITAF    | 11 | -0.5346842 | 1.15E-08 | 0.00021004 | 0.397 | 0.752 |
| RPN2     | 11 | -0.5389328 | 2.25E-08 | 0.00041038 | 0.137 | 0.532 |
| VCAN     | 11 | -0.5406137 | 9.62E-09 | 0.00017561 | 0.164 | 0.596 |
| YBX3     | 11 | -0.5432712 | 6.82E-10 | 1.24E-05   | 0.726 | 0.936 |
| EIF3H    | 11 | -0.5519502 | 1.91E-09 | 3.49E-05   | 0.904 | 0.991 |
| RPLP0    | 11 | -0.5525946 | 1.68E-19 | 3.07E-15   | 1     | 1     |
| ITM2C    | 11 | -0.5537384 | 1.13E-10 | 2.06E-06   | 0.178 | 0.642 |
| EID1     | 11 | -0.5549758 | 4.55E-11 | 8.30E-07   | 0.753 | 1     |
| TPT1     | 11 | -0.5568566 | 2.72E-18 | 4.95E-14   | 1     | 1     |
| SCRG1    | 11 | -0.5636321 | 1.28E-08 | 0.00023271 | 0.904 | 0.945 |

|         |    |            |          |            |       |       |
|---------|----|------------|----------|------------|-------|-------|
| MALAT1  | 11 | -0.5713539 | 8.92E-09 | 0.00016274 | 1     | 1     |
| MDFI    | 11 | -0.5734767 | 1.15E-07 | 0.00210454 | 0.247 | 0.606 |
| CYR61   | 11 | -0.5783161 | 2.67E-06 | 0.04872412 | 0.055 | 0.349 |
| JUNB    | 11 | -0.5789862 | 2.67E-09 | 4.87E-05   | 0.342 | 0.771 |
| H3F3A   | 11 | -0.583965  | 2.87E-13 | 5.23E-09   | 0.918 | 0.991 |
| PEBP1   | 11 | -0.5856065 | 2.27E-10 | 4.14E-06   | 0.644 | 0.936 |
| C7orf73 | 11 | -0.5871462 | 3.83E-08 | 0.00069953 | 0.438 | 0.752 |
| HMG2    | 11 | -0.5915637 | 3.59E-10 | 6.55E-06   | 0.877 | 0.982 |
| PTRF    | 11 | -0.5935836 | 8.62E-09 | 0.00015726 | 0.192 | 0.606 |
| PABPC1  | 11 | -0.6000084 | 1.35E-11 | 2.46E-07   | 0.795 | 0.972 |
| TTC3    | 11 | -0.6012636 | 2.05E-09 | 3.74E-05   | 0.452 | 0.807 |
| THY1    | 11 | -0.6061567 | 7.92E-08 | 0.00144586 | 0.096 | 0.45  |
| CITED2  | 11 | -0.609713  | 2.04E-06 | 0.03720078 | 0.205 | 0.532 |
| VIM     | 11 | -0.6157448 | 2.50E-09 | 4.56E-05   | 0.986 | 1     |
| ITM2A   | 11 | -0.6160458 | 1.12E-10 | 2.04E-06   | 0.137 | 0.606 |
| PDIA6   | 11 | -0.6229826 | 5.84E-09 | 0.00010649 | 0.616 | 0.881 |
| S100A13 | 11 | -0.6266279 | 4.87E-14 | 8.88E-10   | 0.932 | 1     |
| YBX1    | 11 | -0.6320797 | 7.76E-16 | 1.42E-11   | 0.973 | 1     |
| BRK1    | 11 | -0.63542   | 8.53E-14 | 1.56E-09   | 0.589 | 0.945 |
| PKM     | 11 | -0.6363068 | 4.76E-08 | 0.00086797 | 0.849 | 0.982 |
| ZFP36L2 | 11 | -0.6376199 | 1.58E-08 | 0.00028874 | 0.096 | 0.486 |
| FBXO2   | 11 | -0.6390751 | 1.67E-08 | 0.00030427 | 0.548 | 0.807 |
| INHBA   | 11 | -0.6412116 | 2.31E-07 | 0.00421518 | 0.178 | 0.541 |
| RPS11   | 11 | -0.6472691 | 2.44E-19 | 4.45E-15   | 1     | 1     |
| DNM3OS  | 11 | -0.6501987 | 2.16E-08 | 0.00039364 | 0.082 | 0.459 |
| TPM1    | 11 | -0.6536843 | 2.03E-08 | 0.00036966 | 0.493 | 0.835 |
| PLXDC2  | 11 | -0.6559842 | 6.96E-09 | 0.00012698 | 0.301 | 0.688 |
| RPL10A  | 11 | -0.6561249 | 8.70E-18 | 1.59E-13   | 0.986 | 1     |
| ISLR    | 11 | -0.6673527 | 2.29E-10 | 4.19E-06   | 0.068 | 0.514 |
| RPS8    | 11 | -0.6718561 | 1.84E-22 | 3.36E-18   | 1     | 1     |
| SDC2    | 11 | -0.67834   | 5.14E-12 | 9.37E-08   | 0.616 | 0.963 |
| HNRNPA1 | 11 | -0.7029071 | 2.80E-13 | 5.11E-09   | 0.959 | 0.991 |
| RHOBTB3 | 11 | -0.7044353 | 1.80E-14 | 3.29E-10   | 0.233 | 0.817 |
| FXD6    | 11 | -0.707699  | 6.84E-13 | 1.25E-08   | 0.479 | 0.89  |
| FOS     | 11 | -0.7094199 | 4.76E-11 | 8.69E-07   | 0.137 | 0.606 |
| CRTAP   | 11 | -0.7159062 | 6.49E-14 | 1.18E-09   | 0.342 | 0.844 |
| IGFBP6  | 11 | -0.7242506 | 8.90E-09 | 0.0001624  | 0.384 | 0.743 |
| NPC2    | 11 | -0.7322717 | 4.77E-14 | 8.70E-10   | 0.877 | 0.982 |
| RPS20   | 11 | -0.7423327 | 8.20E-25 | 1.50E-20   | 1     | 1     |

|         |    |            |          |            |       |       |
|---------|----|------------|----------|------------|-------|-------|
| IGFBP7  | 11 | -0.7534658 | 2.72E-11 | 4.96E-07   | 0.507 | 0.881 |
| P4HB    | 11 | -0.7540125 | 2.62E-13 | 4.77E-09   | 0.849 | 0.982 |
| SPARC   | 11 | -0.7585791 | 6.48E-14 | 1.18E-09   | 0.123 | 0.697 |
| PRELP   | 11 | -0.7607368 | 7.68E-09 | 0.00014011 | 0.63  | 0.908 |
| COL11A1 | 11 | -0.7622624 | 1.04E-10 | 1.89E-06   | 0.205 | 0.679 |
| NEAT1   | 11 | -0.7701109 | 1.28E-12 | 2.33E-08   | 0.986 | 1     |
| COL9A3  | 11 | -0.7750155 | 3.44E-10 | 6.28E-06   | 0.288 | 0.734 |
| EEF2    | 11 | -0.792375  | 3.00E-15 | 5.48E-11   | 0.973 | 1     |
| EEF1A1  | 11 | -0.7966586 | 1.45E-17 | 2.65E-13   | 1     | 1     |
| SNAI2   | 11 | -0.8030844 | 1.01E-07 | 0.00184399 | 0.288 | 0.615 |
| GPX3    | 11 | -0.8065626 | 4.55E-14 | 8.31E-10   | 0.795 | 0.991 |
| CD99    | 11 | -0.8105431 | 2.12E-19 | 3.87E-15   | 0.753 | 0.991 |
| CCNI    | 11 | -0.8133589 | 1.36E-19 | 2.47E-15   | 0.986 | 1     |
| FMOD    | 11 | -0.8217019 | 1.19E-12 | 2.17E-08   | 0.548 | 0.881 |
| MIA     | 11 | -0.8239185 | 6.59E-13 | 1.20E-08   | 0.781 | 0.954 |
| RPL4    | 11 | -0.8299918 | 7.25E-25 | 1.32E-20   | 0.986 | 1     |
| DCN     | 11 | -0.8471372 | 1.57E-12 | 2.87E-08   | 1     | 1     |
| PTMS    | 11 | -0.8482048 | 6.98E-17 | 1.27E-12   | 0.37  | 0.89  |
| MYLK    | 11 | -0.8565474 | 4.51E-10 | 8.23E-06   | 0.301 | 0.734 |
| LECT1   | 11 | -0.8628036 | 9.04E-10 | 1.65E-05   | 0.26  | 0.706 |
| CST3    | 11 | -0.8699219 | 6.96E-16 | 1.27E-11   | 0.918 | 0.991 |
| ACAN    | 11 | -0.8743474 | 2.29E-12 | 4.18E-08   | 0.521 | 0.908 |
| S100B   | 11 | -0.8795261 | 1.08E-11 | 1.97E-07   | 0.315 | 0.734 |
| HTRA1   | 11 | -0.8968525 | 1.68E-15 | 3.06E-11   | 0.37  | 0.881 |
| NGFRAP1 | 11 | -0.9026    | 6.39E-17 | 1.17E-12   | 0.562 | 0.945 |
| ID2     | 11 | -0.9446947 | 1.35E-11 | 2.46E-07   | 0.164 | 0.651 |
| ADIRF   | 11 | -0.9478505 | 4.90E-14 | 8.94E-10   | 0.438 | 0.936 |
| RBP4    | 11 | -1.0198921 | 1.11E-16 | 2.03E-12   | 0.288 | 0.872 |
| C2orf40 | 11 | -1.0361414 | 5.70E-13 | 1.04E-08   | 0.781 | 0.972 |
| CAPS    | 11 | -1.037924  | 8.81E-14 | 1.61E-09   | 0.534 | 0.899 |
| MGP     | 11 | -1.0613715 | 1.62E-11 | 2.95E-07   | 0.986 | 1     |
| C2orf82 | 11 | -1.0777961 | 6.66E-13 | 1.21E-08   | 0.836 | 0.991 |
| PAX1    | 11 | -1.0975232 | 1.33E-21 | 2.43E-17   | 0.356 | 0.972 |
| COL2A1  | 11 | -1.1932151 | 3.96E-18 | 7.22E-14   | 0.205 | 0.835 |
| ID3     | 11 | -1.2943448 | 1.26E-14 | 2.31E-10   | 0.178 | 0.734 |
| PLAC9   | 11 | -1.3355209 | 5.11E-22 | 9.32E-18   | 0.438 | 0.963 |
| ID1     | 11 | -1.3405007 | 1.19E-12 | 2.16E-08   | 0.164 | 0.67  |
| CLEC3A  | 11 | -1.5309864 | 1.38E-20 | 2.52E-16   | 0.068 | 0.807 |
| FRZB    | 11 | -1.5599474 | 4.96E-14 | 9.05E-10   | 0.137 | 0.725 |

|             |                |                  |              |                  |              |              |
|-------------|----------------|------------------|--------------|------------------|--------------|--------------|
| SPTSSB      | 11             | -1.6249253       | 6.53E-19     | 1.19E-14         | 0.055        | 0.743        |
| OGN         | 11             | -1.6508851       | 1.94E-20     | 3.55E-16         | 0.274        | 0.954        |
| SLPI        | 11             | -2.3110037       | 4.43E-20     | 8.08E-16         | 0.685        | 1            |
| <b>gene</b> | <b>cluster</b> | <b>avg_logFC</b> | <b>p_val</b> | <b>p_val_adj</b> | <b>pct.1</b> | <b>pct.2</b> |
| SPP1        | 12             | 3.88156734       | 6.84E-21     | 1.25E-16         | 0.964        | 0.022        |
| PRG4        | 12             | 2.62280181       | 1.88E-15     | 3.44E-11         | 0.786        | 0.022        |
| COMP        | 12             | 1.928703         | 6.30E-20     | 1.15E-15         | 1            | 0.8          |
| MT2A        | 12             | 1.57115537       | 1.70E-13     | 3.10E-09         | 1            | 1            |
| PTGS2       | 12             | 1.53991806       | 1.81E-17     | 3.30E-13         | 0.848        | 0.022        |
| UPP1        | 12             | 1.5252796        | 2.98E-18     | 5.44E-14         | 0.893        | 0.089        |
| IGFBP3      | 12             | 1.51089302       | 8.39E-12     | 1.53E-07         | 0.67         | 0.044        |
| FN1         | 12             | 1.37764383       | 9.04E-19     | 1.65E-14         | 1            | 1            |
| CHI3L2      | 12             | 1.25403767       | 1.81E-06     | 0.0330434        | 0.786        | 0.556        |
| VEGFA       | 12             | 1.20842715       | 4.52E-15     | 8.24E-11         | 0.911        | 0.244        |
| BHLHE40     | 12             | 1.20484933       | 2.26E-13     | 4.13E-09         | 0.804        | 0.156        |
| BZW1        | 12             | 1.17318657       | 9.07E-15     | 1.65E-10         | 0.911        | 0.378        |
| SOD2        | 12             | 1.17306641       | 2.53E-11     | 4.62E-07         | 1            | 0.867        |
| TIMP1       | 12             | 1.16316147       | 9.83E-12     | 1.79E-07         | 1            | 1            |
| TM4SF1      | 12             | 1.1518568        | 1.30E-07     | 0.00236362       | 0.83         | 0.444        |
| ABI3BP      | 12             | 1.14801803       | 1.63E-12     | 2.98E-08         | 0.795        | 0.222        |
| ERO1A       | 12             | 1.13426874       | 7.67E-13     | 1.40E-08         | 0.821        | 0.267        |
| DDIT4L      | 12             | 1.11974914       | 2.96E-13     | 5.40E-09         | 0.964        | 0.333        |
| TIMP3       | 12             | 1.11602578       | 5.95E-09     | 0.00010854       | 0.83         | 0.422        |
| SLC3A2      | 12             | 1.07346617       | 1.32E-14     | 2.41E-10         | 0.884        | 0.311        |
| NRP2        | 12             | 1.06989849       | 2.52E-11     | 4.61E-07         | 0.652        | 0.044        |
| CTSL        | 12             | 1.06224464       | 1.02E-08     | 0.00018574       | 0.884        | 0.511        |
| WTAP        | 12             | 1.0611757        | 1.42E-13     | 2.59E-09         | 0.938        | 0.444        |
| S100A2      | 12             | 1.03407377       | 6.77E-08     | 0.00123501       | 0.75         | 0.356        |
| PTP4A1      | 12             | 1.01268258       | 1.72E-13     | 3.13E-09         | 0.812        | 0.156        |
| CD55        | 12             | 1.01089618       | 4.48E-13     | 8.18E-09         | 0.982        | 0.556        |
| SLC2A1      | 12             | 1.00692278       | 8.49E-12     | 1.55E-07         | 0.688        | 0.067        |
| CD44        | 12             | 0.98410644       | 5.11E-15     | 9.32E-11         | 0.991        | 0.422        |
| ENO2        | 12             | 0.98215371       | 1.90E-14     | 3.47E-10         | 0.777        | 0.067        |
| STK17A      | 12             | 0.96747898       | 3.13E-09     | 5.71E-05         | 0.634        | 0.133        |
| TMEM45A     | 12             | 0.96423019       | 1.27E-10     | 2.33E-06         | 0.938        | 0.578        |
| SMOX        | 12             | 0.96303799       | 1.58E-07     | 0.00288781       | 0.545        | 0.111        |
| MMP3        | 12             | 0.9446856        | 3.82E-08     | 0.00069743       | 1            | 0.956        |
| NDRG1       | 12             | 0.92222547       | 5.68E-11     | 1.04E-06         | 0.723        | 0.111        |
| RGCC        | 12             | 0.91167179       | 2.53E-07     | 0.00462338       | 0.973        | 0.756        |



|            |    |            |          |            |       |       |
|------------|----|------------|----------|------------|-------|-------|
| C11orf96   | 12 | 0.88361995 | 5.62E-08 | 0.00102479 | 0.464 | 0     |
| DNER       | 12 | 0.86893397 | 7.25E-10 | 1.32E-05   | 0.759 | 0.244 |
| PPP1CB     | 12 | 0.86311597 | 1.66E-08 | 0.00030322 | 0.893 | 0.511 |
| PPP3CA     | 12 | 0.85237314 | 4.12E-10 | 7.53E-06   | 0.929 | 0.467 |
| PPFIBP1    | 12 | 0.85121298 | 1.18E-08 | 0.00021505 | 0.634 | 0.156 |
| PLCG2      | 12 | 0.83547133 | 1.83E-07 | 0.00334232 | 0.464 | 0.022 |
| RABGGTB    | 12 | 0.80545893 | 1.20E-11 | 2.19E-07   | 0.884 | 0.356 |
| DDIT3      | 12 | 0.80167089 | 1.81E-07 | 0.00330899 | 0.679 | 0.289 |
| VAPA       | 12 | 0.79417354 | 6.95E-14 | 1.27E-09   | 0.982 | 0.867 |
| MIF        | 12 | 0.78134526 | 1.23E-16 | 2.25E-12   | 1     | 1     |
| ATP6V1G1   | 12 | 0.77764424 | 2.55E-13 | 4.65E-09   | 0.991 | 0.978 |
| HMGA1      | 12 | 0.77217023 | 6.53E-08 | 0.00119084 | 0.696 | 0.222 |
| IFRD1      | 12 | 0.7717095  | 6.10E-08 | 0.00111229 | 0.723 | 0.333 |
| TGFBI      | 12 | 0.76100304 | 2.20E-06 | 0.04019776 | 0.562 | 0.178 |
| RNF114     | 12 | 0.7592951  | 3.12E-07 | 0.0056993  | 0.696 | 0.356 |
| GBE1       | 12 | 0.75658669 | 8.02E-09 | 0.00014628 | 0.848 | 0.422 |
| RNF145     | 12 | 0.74248086 | 1.56E-07 | 0.00284985 | 0.661 | 0.2   |
| AK2        | 12 | 0.74061892 | 3.10E-10 | 5.66E-06   | 0.884 | 0.556 |
| TREM1      | 12 | 0.7282385  | 8.30E-08 | 0.00151383 | 0.455 | 0     |
| WSB1       | 12 | 0.72639643 | 3.54E-09 | 6.45E-05   | 0.902 | 0.467 |
| SGIP1      | 12 | 0.71958044 | 6.59E-09 | 0.00012017 | 0.509 | 0     |
| CCDC85B    | 12 | 0.71509469 | 6.76E-07 | 0.01233031 | 0.92  | 0.578 |
| FAP        | 12 | 0.71447957 | 1.97E-09 | 3.59E-05   | 0.58  | 0.044 |
| PMP22      | 12 | 0.71114576 | 7.32E-08 | 0.00133495 | 0.902 | 0.533 |
| PPP1R15A   | 12 | 0.70590033 | 2.19E-08 | 0.00039953 | 0.554 | 0.067 |
| TNFRSF12A  | 12 | 0.70498164 | 8.90E-08 | 0.0016244  | 0.598 | 0.111 |
| CSGALNACT2 | 12 | 0.70203613 | 2.68E-07 | 0.00489153 | 0.429 | 0     |
| AIMP1      | 12 | 0.69760153 | 3.08E-09 | 5.62E-05   | 0.795 | 0.267 |
| EIF5       | 12 | 0.68642823 | 6.40E-08 | 0.00116773 | 0.786 | 0.356 |
| PGK1       | 12 | 0.67577413 | 1.72E-10 | 3.14E-06   | 0.973 | 0.956 |
| NPR3       | 12 | 0.67562262 | 8.41E-07 | 0.01534631 | 0.429 | 0.022 |
| ENO1       | 12 | 0.67270956 | 4.66E-11 | 8.50E-07   | 1     | 0.978 |
| SBDS       | 12 | 0.67036838 | 4.83E-08 | 0.00088151 | 0.75  | 0.311 |
| SNRNP27    | 12 | 0.6598612  | 1.21E-07 | 0.00221363 | 0.607 | 0.156 |
| CRLF1      | 12 | 0.65260416 | 1.67E-06 | 0.03056338 | 0.491 | 0.089 |
| MED21      | 12 | 0.65108152 | 2.78E-07 | 0.00506522 | 0.732 | 0.333 |
| WDR45B     | 12 | 0.64841129 | 1.17E-08 | 0.00021273 | 0.607 | 0.111 |
| ARPP19     | 12 | 0.63834583 | 4.05E-08 | 0.00073955 | 0.795 | 0.422 |
| CCND1      | 12 | 0.63480063 | 8.89E-07 | 0.01621995 | 0.429 | 0.022 |

|          |    |            |          |            |       |       |
|----------|----|------------|----------|------------|-------|-------|
| RBM39    | 12 | 0.63480063 | 7.05E-07 | 0.01285639 | 0.714 | 0.333 |
| CRTAC1   | 12 | 0.63306301 | 7.81E-07 | 0.01425528 | 0.482 | 0.067 |
| GOLT1B   | 12 | 0.62463251 | 1.63E-06 | 0.02967142 | 0.571 | 0.178 |
| WDR33    | 12 | 0.62273665 | 1.12E-07 | 0.00204269 | 0.696 | 0.289 |
| CCT8     | 12 | 0.61835216 | 5.97E-07 | 0.01089779 | 0.804 | 0.444 |
| SQSTM1   | 12 | 0.61702104 | 7.12E-09 | 0.00012995 | 1     | 0.956 |
| GPX1     | 12 | 0.61531541 | 1.05E-08 | 0.00019232 | 0.964 | 0.667 |
| PDE4B    | 12 | 0.61512531 | 1.25E-06 | 0.02282425 | 0.473 | 0.067 |
| DNAJB9   | 12 | 0.61039033 | 3.32E-07 | 0.00604994 | 0.884 | 0.533 |
| XBP1     | 12 | 0.60834043 | 1.15E-07 | 0.00209559 | 0.884 | 0.422 |
| SMS      | 12 | 0.60745043 | 7.61E-07 | 0.01389317 | 0.625 | 0.244 |
| CTTN     | 12 | 0.59807194 | 2.31E-06 | 0.04214898 | 0.598 | 0.2   |
| RELB     | 12 | 0.59450602 | 1.17E-07 | 0.0021286  | 0.518 | 0.044 |
| SLC25A37 | 12 | 0.59224102 | 8.97E-08 | 0.00163632 | 0.902 | 0.533 |
| RNMT     | 12 | 0.58840224 | 1.02E-06 | 0.01857144 | 0.634 | 0.222 |
| CD68     | 12 | 0.58427285 | 6.37E-07 | 0.01162968 | 0.607 | 0.178 |
| NBPF14   | 12 | 0.58035027 | 4.15E-07 | 0.00756878 | 0.473 | 0.044 |
| EIF4A2   | 12 | 0.57997977 | 3.62E-12 | 6.61E-08   | 1     | 1     |
| METAP2   | 12 | 0.57717076 | 1.57E-07 | 0.00286644 | 0.92  | 0.533 |
| RAB1A    | 12 | 0.56831643 | 2.00E-06 | 0.03654263 | 0.857 | 0.556 |
| COX7A2   | 12 | 0.56484204 | 2.12E-11 | 3.87E-07   | 1     | 0.978 |
| ARF6     | 12 | 0.55690165 | 2.70E-06 | 0.04924246 | 0.679 | 0.289 |
| CCDC174  | 12 | 0.55450069 | 5.52E-07 | 0.01006561 | 0.491 | 0.067 |
| BTG3     | 12 | 0.5530203  | 1.48E-06 | 0.02698829 | 0.554 | 0.156 |
| HMGA2    | 12 | 0.5285252  | 1.64E-06 | 0.02984975 | 0.384 | 0     |
| SYF2     | 12 | 0.51908226 | 6.62E-07 | 0.01207499 | 0.955 | 0.667 |
| NOL7     | 12 | 0.50077529 | 2.19E-06 | 0.03994288 | 0.786 | 0.378 |
| FAM162A  | 12 | 0.49964823 | 1.12E-06 | 0.02043217 | 0.955 | 0.8   |
| SPRY2    | 12 | 0.49643689 | 2.34E-06 | 0.04269209 | 0.375 | 0     |
| GAPDH    | 12 | 0.4208271  | 2.57E-07 | 0.00469282 | 1     | 1     |
| OAZ1     | 12 | 0.36599548 | 1.93E-06 | 0.03527826 | 1     | 0.978 |
| AGT      | 12 | -0.2537805 | 2.86E-07 | 0.00521978 | 0     | 0.222 |
| MALL     | 12 | -0.2612488 | 9.18E-07 | 0.01674849 | 0.027 | 0.289 |
| RPS4X    | 12 | -0.2722518 | 1.18E-07 | 0.00216012 | 1     | 1     |
| RPL5     | 12 | -0.2788938 | 5.30E-07 | 0.0096783  | 1     | 1     |
| RPLP1    | 12 | -0.2859181 | 1.45E-09 | 2.65E-05   | 1     | 1     |
| RPL27A   | 12 | -0.2867147 | 1.16E-08 | 0.00021155 | 1     | 1     |
| KHDRBS3  | 12 | -0.2876821 | 1.50E-08 | 0.00027329 | 0     | 0.267 |
| RPL7A    | 12 | -0.2884525 | 8.03E-07 | 0.01464503 | 1     | 1     |

|            |    |            |          |            |       |       |
|------------|----|------------|----------|------------|-------|-------|
| RPL37      | 12 | -0.2926375 | 8.65E-09 | 0.00015777 | 1     | 1     |
| RPL22      | 12 | -0.295628  | 3.04E-07 | 0.00555435 | 1     | 1     |
| TXNIP      | 12 | -0.3115829 | 6.30E-09 | 0.0001149  | 0.009 | 0.311 |
| RPL37A     | 12 | -0.3117796 | 1.45E-10 | 2.64E-06   | 1     | 1     |
| RPL15      | 12 | -0.3154444 | 4.09E-11 | 7.46E-07   | 1     | 1     |
| ABHD14A    | 12 | -0.3204719 | 3.37E-09 | 6.15E-05   | 0     | 0.289 |
| RPS3       | 12 | -0.3219582 | 1.68E-10 | 3.06E-06   | 1     | 1     |
| RPL35A     | 12 | -0.327089  | 1.79E-10 | 3.26E-06   | 1     | 1     |
| RPL35      | 12 | -0.3277368 | 2.73E-09 | 4.97E-05   | 1     | 1     |
| RPL18A     | 12 | -0.3312909 | 1.08E-09 | 1.97E-05   | 1     | 1     |
| RPL29      | 12 | -0.3343871 | 4.18E-08 | 0.00076292 | 1     | 1     |
| RPL3       | 12 | -0.3347264 | 1.16E-09 | 2.11E-05   | 1     | 1     |
| RPL11      | 12 | -0.3357421 | 2.68E-13 | 4.90E-09   | 1     | 1     |
| RPL6       | 12 | -0.3427255 | 4.70E-10 | 8.57E-06   | 1     | 1     |
| CTSA       | 12 | -0.3479009 | 4.44E-08 | 0.00081059 | 0.036 | 0.356 |
| SMIM14     | 12 | -0.3481473 | 1.61E-06 | 0.02937895 | 0.08  | 0.4   |
| RPS23      | 12 | -0.3518826 | 2.51E-10 | 4.57E-06   | 1     | 1     |
| AC003090.1 | 12 | -0.3522206 | 1.61E-10 | 2.95E-06   | 0     | 0.333 |
| HOXB8      | 12 | -0.3522206 | 7.49E-10 | 1.37E-05   | 0     | 0.311 |
| RPN2       | 12 | -0.3543551 | 1.86E-07 | 0.00339374 | 0.045 | 0.356 |
| HTATIP2    | 12 | -0.3629388 | 7.61E-10 | 1.39E-05   | 0.027 | 0.4   |
| RPS27      | 12 | -0.3654042 | 1.09E-14 | 1.99E-10   | 1     | 1     |
| CXXC5      | 12 | -0.3677248 | 3.40E-09 | 6.21E-05   | 0     | 0.289 |
| RPL30      | 12 | -0.370516  | 3.00E-10 | 5.47E-06   | 1     | 1     |
| TOMM7      | 12 | -0.3749991 | 5.15E-08 | 0.00093979 | 1     | 1     |
| RPL13A     | 12 | -0.3780493 | 8.42E-14 | 1.54E-09   | 1     | 1     |
| RPS6       | 12 | -0.3836302 | 7.37E-14 | 1.34E-09   | 1     | 1     |
| NFIA       | 12 | -0.3870245 | 1.05E-06 | 0.01916721 | 0.071 | 0.378 |
| RPS18      | 12 | -0.3896058 | 4.55E-13 | 8.31E-09   | 1     | 1     |
| ENPP1      | 12 | -0.3953928 | 2.33E-07 | 0.00424863 | 0.045 | 0.356 |
| PTRF       | 12 | -0.3960232 | 1.07E-06 | 0.01950224 | 0.143 | 0.511 |
| RPS25      | 12 | -0.3996719 | 1.66E-12 | 3.02E-08   | 1     | 1     |
| C14orf1    | 12 | -0.4065053 | 2.12E-06 | 0.03864507 | 0.08  | 0.378 |
| RPL23      | 12 | -0.4080038 | 1.98E-08 | 0.00036103 | 0.991 | 1     |
| RPS3A      | 12 | -0.4130777 | 6.97E-14 | 1.27E-09   | 1     | 1     |
| RPL9       | 12 | -0.4136332 | 3.07E-12 | 5.60E-08   | 1     | 1     |
| PIGT       | 12 | -0.4263286 | 2.95E-09 | 5.38E-05   | 0.036 | 0.4   |
| RPL19      | 12 | -0.4265985 | 1.04E-16 | 1.90E-12   | 1     | 1     |
| RPL10      | 12 | -0.4274643 | 7.61E-16 | 1.39E-11   | 1     | 1     |

|         |    |            |          |            |       |       |
|---------|----|------------|----------|------------|-------|-------|
| RPL14   | 12 | -0.4283128 | 7.56E-14 | 1.38E-09   | 1     | 1     |
| RPS2    | 12 | -0.4344979 | 1.51E-12 | 2.75E-08   | 1     | 1     |
| RPS9    | 12 | -0.4374649 | 1.17E-12 | 2.14E-08   | 1     | 1     |
| RPS17   | 12 | -0.439622  | 6.91E-11 | 1.26E-06   | 1     | 1     |
| S100A13 | 12 | -0.4397472 | 5.18E-08 | 0.00094498 | 0.973 | 1     |
| EFNA1   | 12 | -0.4403279 | 2.16E-06 | 0.03935588 | 0.143 | 0.489 |
| GREM1   | 12 | -0.4418328 | 6.66E-08 | 0.00121575 | 0     | 0.244 |
| RPL13   | 12 | -0.4428113 | 6.32E-16 | 1.15E-11   | 1     | 1     |
| TMEM98  | 12 | -0.4464731 | 4.06E-09 | 7.40E-05   | 0.107 | 0.556 |
| RPS29   | 12 | -0.4476599 | 1.27E-14 | 2.31E-10   | 1     | 1     |
| PCBP2   | 12 | -0.4478029 | 3.47E-07 | 0.0063398  | 0.804 | 0.978 |
| COMMD6  | 12 | -0.4481575 | 9.45E-08 | 0.00172373 | 1     | 1     |
| RPL18   | 12 | -0.4494705 | 3.14E-13 | 5.73E-09   | 1     | 1     |
| ANXA2   | 12 | -0.4505919 | 2.68E-06 | 0.04883063 | 0.804 | 0.978 |
| RPS7    | 12 | -0.4519411 | 1.13E-10 | 2.05E-06   | 1     | 1     |
| SSR2    | 12 | -0.4540033 | 1.33E-06 | 0.02434791 | 0.723 | 0.956 |
| RPS5    | 12 | -0.459356  | 1.59E-13 | 2.90E-09   | 1     | 1     |
| RPS27A  | 12 | -0.4599586 | 1.03E-16 | 1.88E-12   | 1     | 1     |
| PNKD    | 12 | -0.4641385 | 4.68E-08 | 0.00085308 | 0.161 | 0.578 |
| FMOD    | 12 | -0.4655493 | 5.74E-07 | 0.01046935 | 0.848 | 1     |
| DYNLT1  | 12 | -0.4674559 | 6.45E-08 | 0.00117756 | 0.116 | 0.511 |
| RPS16   | 12 | -0.4693864 | 9.54E-14 | 1.74E-09   | 1     | 1     |
| SSPN    | 12 | -0.4718851 | 9.83E-09 | 0.00017929 | 0.045 | 0.4   |
| PRUNE2  | 12 | -0.4735815 | 3.05E-07 | 0.00556709 | 0.08  | 0.422 |
| RPL8    | 12 | -0.479576  | 9.30E-15 | 1.70E-10   | 1     | 1     |
| TCEB2   | 12 | -0.4803343 | 4.42E-08 | 0.00080669 | 0.92  | 0.978 |
| RPL34   | 12 | -0.4847324 | 4.05E-16 | 7.38E-12   | 1     | 1     |
| CST3    | 12 | -0.4866468 | 4.16E-07 | 0.00759178 | 0.982 | 1     |
| PRCP    | 12 | -0.4894217 | 5.94E-08 | 0.00108429 | 0.062 | 0.4   |
| GNAS    | 12 | -0.4914679 | 5.55E-07 | 0.01012825 | 0.321 | 0.711 |
| HMG2    | 12 | -0.4926411 | 5.81E-07 | 0.01061037 | 0.777 | 0.956 |
| HNRNPA1 | 12 | -0.4976376 | 1.44E-09 | 2.63E-05   | 0.991 | 1     |
| ATRNL1  | 12 | -0.4978606 | 3.41E-08 | 0.00062271 | 0.045 | 0.378 |
| PIM3    | 12 | -0.4997267 | 2.60E-07 | 0.00473654 | 0.214 | 0.622 |
| IER2    | 12 | -0.5022645 | 1.25E-07 | 0.00228733 | 0.08  | 0.422 |
| SLC14A1 | 12 | -0.5063713 | 4.82E-08 | 0.00087861 | 0.08  | 0.444 |
| RPLP2   | 12 | -0.5073379 | 4.37E-16 | 7.97E-12   | 1     | 1     |
| FTL     | 12 | -0.5086868 | 1.39E-12 | 2.53E-08   | 1     | 1     |
| MT-ND4  | 12 | -0.5209701 | 2.56E-06 | 0.04663177 | 0.946 | 0.978 |

|         |    |            |          |            |       |       |
|---------|----|------------|----------|------------|-------|-------|
| PRELP   | 12 | -0.5225321 | 2.52E-06 | 0.04602773 | 0.982 | 1     |
| RPL7    | 12 | -0.5239016 | 6.29E-16 | 1.15E-11   | 1     | 1     |
| RABAC1  | 12 | -0.5240709 | 1.98E-07 | 0.00360603 | 0.67  | 0.889 |
| TPT1    | 12 | -0.5248262 | 1.12E-14 | 2.05E-10   | 1     | 1     |
| PRDX5   | 12 | -0.5249686 | 3.01E-09 | 5.50E-05   | 0.795 | 0.978 |
| DCN     | 12 | -0.5273567 | 1.60E-10 | 2.93E-06   | 1     | 1     |
| EEF1B2  | 12 | -0.5290709 | 2.98E-09 | 5.44E-05   | 0.946 | 1     |
| EEF2    | 12 | -0.5293278 | 2.08E-06 | 0.03787782 | 0.991 | 1     |
| RPL23A  | 12 | -0.5309558 | 3.33E-19 | 6.08E-15   | 1     | 1     |
| RPS13   | 12 | -0.5349926 | 4.19E-16 | 7.65E-12   | 1     | 1     |
| SEC11A  | 12 | -0.5359915 | 1.29E-08 | 0.00023525 | 0.795 | 0.933 |
| SARAF   | 12 | -0.5382119 | 7.00E-07 | 0.01278123 | 0.339 | 0.689 |
| C7orf73 | 12 | -0.5389965 | 3.46E-07 | 0.00630633 | 0.384 | 0.8   |
| FBXO2   | 12 | -0.5406603 | 7.58E-09 | 0.00013828 | 0.598 | 0.933 |
| INHBA   | 12 | -0.5498564 | 3.38E-07 | 0.00616627 | 0.089 | 0.444 |
| PEBP1   | 12 | -0.5768612 | 2.52E-07 | 0.00459431 | 0.634 | 0.911 |
| IFITM2  | 12 | -0.5787578 | 1.57E-06 | 0.02862687 | 0.759 | 0.978 |
| GAS6    | 12 | -0.5851522 | 3.18E-10 | 5.80E-06   | 0.08  | 0.511 |
| CTSD    | 12 | -0.5910139 | 3.91E-07 | 0.00713005 | 0.732 | 0.956 |
| TMED2   | 12 | -0.5933827 | 7.36E-10 | 1.34E-05   | 0.616 | 0.933 |
| RPS11   | 12 | -0.5992023 | 2.15E-12 | 3.92E-08   | 1     | 1     |
| SSR3    | 12 | -0.6013891 | 2.44E-09 | 4.45E-05   | 0.804 | 0.956 |
| MDFI    | 12 | -0.6031009 | 3.28E-08 | 0.00059842 | 0.089 | 0.467 |
| NEAT1   | 12 | -0.6077766 | 3.26E-09 | 5.96E-05   | 0.991 | 1     |
| CCNI    | 12 | -0.6078214 | 1.84E-08 | 0.00033555 | 0.982 | 1     |
| FCGRT   | 12 | -0.608529  | 2.41E-09 | 4.39E-05   | 0.312 | 0.778 |
| BSG     | 12 | -0.6131392 | 4.28E-09 | 7.82E-05   | 0.473 | 0.867 |
| TSPO    | 12 | -0.613497  | 6.41E-10 | 1.17E-05   | 0.589 | 1     |
| ID4     | 12 | -0.6151045 | 1.71E-07 | 0.00312232 | 0.17  | 0.556 |
| PRSS23  | 12 | -0.6158555 | 3.03E-11 | 5.52E-07   | 0.071 | 0.533 |
| PPIA    | 12 | -0.6233268 | 2.01E-10 | 3.66E-06   | 0.893 | 1     |
| ITM2C   | 12 | -0.6241543 | 3.68E-08 | 0.00067204 | 0.179 | 0.578 |
| LRPAP1  | 12 | -0.6262752 | 6.95E-09 | 0.00012687 | 0.286 | 0.711 |
| BRK1    | 12 | -0.6322515 | 4.01E-12 | 7.32E-08   | 0.661 | 1     |
| PABPC1  | 12 | -0.6343585 | 5.62E-09 | 0.0001025  | 0.652 | 1     |
| RNF130  | 12 | -0.6344531 | 1.48E-09 | 2.71E-05   | 0.304 | 0.756 |
| YBX1    | 12 | -0.6396242 | 2.96E-13 | 5.41E-09   | 0.938 | 1     |
| SNAI2   | 12 | -0.6523252 | 1.04E-07 | 0.00190486 | 0.17  | 0.556 |
| RPS8    | 12 | -0.65537   | 1.54E-17 | 2.81E-13   | 1     | 1     |

|          |    |            |          |            |       |       |
|----------|----|------------|----------|------------|-------|-------|
| KDEL2    | 12 | -0.6562162 | 1.23E-09 | 2.25E-05   | 0.625 | 0.978 |
| SLC40A1  | 12 | -0.6617854 | 8.56E-14 | 1.56E-09   | 0.009 | 0.467 |
| RPL4     | 12 | -0.6639659 | 2.17E-13 | 3.96E-09   | 0.991 | 1     |
| HLA-C    | 12 | -0.6691265 | 3.02E-10 | 5.50E-06   | 0.938 | 1     |
| NGFRAP1  | 12 | -0.6706743 | 1.10E-10 | 2.00E-06   | 0.589 | 1     |
| RPL10A   | 12 | -0.671537  | 1.34E-16 | 2.44E-12   | 1     | 1     |
| ATPIF1   | 12 | -0.6726067 | 4.30E-08 | 0.00078444 | 0.438 | 0.756 |
| NDUFA11  | 12 | -0.6772204 | 9.31E-12 | 1.70E-07   | 0.705 | 0.978 |
| DUSP1    | 12 | -0.6820483 | 5.28E-08 | 0.0009637  | 0.223 | 0.622 |
| PTMS     | 12 | -0.6828277 | 1.64E-11 | 2.98E-07   | 0.295 | 0.844 |
| SPON2    | 12 | -0.6842582 | 2.20E-12 | 4.02E-08   | 0.009 | 0.422 |
| RPS20    | 12 | -0.6875184 | 1.82E-15 | 3.32E-11   | 1     | 1     |
| RPLP0    | 12 | -0.6877145 | 1.23E-18 | 2.24E-14   | 1     | 1     |
| CCNG1    | 12 | -0.6905994 | 2.76E-09 | 5.04E-05   | 0.17  | 0.578 |
| HLA-B    | 12 | -0.7019381 | 3.87E-10 | 7.07E-06   | 0.786 | 0.933 |
| COL2A1   | 12 | -0.7073047 | 1.60E-15 | 2.92E-11   | 0.268 | 0.933 |
| POLR2L   | 12 | -0.7083724 | 2.81E-12 | 5.13E-08   | 0.652 | 1     |
| NPC2     | 12 | -0.7119869 | 1.01E-13 | 1.84E-09   | 0.955 | 1     |
| FXVD6    | 12 | -0.7159619 | 1.09E-12 | 2.00E-08   | 0.482 | 0.956 |
| EIF3H    | 12 | -0.7174029 | 1.08E-12 | 1.97E-08   | 0.964 | 1     |
| ITM2A    | 12 | -0.7275899 | 5.06E-09 | 9.23E-05   | 0.491 | 0.822 |
| EEF1A1   | 12 | -0.7307085 | 1.12E-18 | 2.05E-14   | 1     | 1     |
| ISLR     | 12 | -0.7440429 | 5.68E-12 | 1.04E-07   | 0.098 | 0.578 |
| C2orf40  | 12 | -0.7462366 | 4.68E-11 | 8.55E-07   | 1     | 1     |
| GRN      | 12 | -0.7576857 | 3.53E-15 | 6.44E-11   | 0.045 | 0.6   |
| MT-ND1   | 12 | -0.7703368 | 1.96E-14 | 3.57E-10   | 0.179 | 0.8   |
| S100B    | 12 | -0.7777446 | 8.71E-12 | 1.59E-07   | 0.598 | 0.978 |
| H3F3A    | 12 | -0.7926114 | 1.99E-15 | 3.62E-11   | 0.866 | 1     |
| HLA-A    | 12 | -0.7950548 | 2.55E-11 | 4.66E-07   | 0.902 | 1     |
| CRISPLD1 | 12 | -0.7995691 | 1.66E-14 | 3.02E-10   | 0.009 | 0.489 |
| CRTAP    | 12 | -0.8064759 | 1.64E-11 | 2.99E-07   | 0.357 | 0.844 |
| PDIA6    | 12 | -0.8086521 | 9.41E-13 | 1.72E-08   | 0.277 | 0.8   |
| COL11A1  | 12 | -0.8104839 | 1.78E-14 | 3.25E-10   | 0.268 | 0.911 |
| LECT1    | 12 | -0.8200815 | 6.51E-10 | 1.19E-05   | 0.732 | 1     |
| CTSC     | 12 | -0.8216853 | 1.37E-09 | 2.51E-05   | 0.036 | 0.4   |
| CITED2   | 12 | -0.8412188 | 9.13E-14 | 1.67E-09   | 0.116 | 0.667 |
| IGFBP6   | 12 | -0.8434726 | 1.73E-07 | 0.00315268 | 0.482 | 0.844 |
| RHOBTB3  | 12 | -0.8438857 | 2.03E-13 | 3.70E-09   | 0.188 | 0.733 |
| FOS      | 12 | -0.849961  | 1.33E-09 | 2.42E-05   | 0.214 | 0.644 |

|          |    |            |          |          |       |       |
|----------|----|------------|----------|----------|-------|-------|
| PNRC1    | 12 | -0.8692768 | 2.49E-14 | 4.54E-10 | 0.866 | 1     |
| P4HB     | 12 | -0.8731842 | 1.47E-11 | 2.68E-07 | 0.482 | 0.933 |
| RBP4     | 12 | -0.8740961 | 3.10E-11 | 5.67E-07 | 0.527 | 0.911 |
| ID2      | 12 | -0.8972376 | 3.81E-11 | 6.96E-07 | 0.179 | 0.667 |
| YBX3     | 12 | -0.8982922 | 2.00E-12 | 3.64E-08 | 0.518 | 0.956 |
| SPARC    | 12 | -0.918854  | 4.74E-15 | 8.65E-11 | 0.152 | 0.778 |
| ZFP36L2  | 12 | -0.9353669 | 1.71E-13 | 3.12E-09 | 0.071 | 0.6   |
| JUNB     | 12 | -0.9728309 | 1.80E-12 | 3.28E-08 | 0.223 | 0.756 |
| CD99     | 12 | -0.9864472 | 5.62E-15 | 1.03E-10 | 0.768 | 0.978 |
| COL9A3   | 12 | -0.9942074 | 3.81E-13 | 6.95E-09 | 0.384 | 0.911 |
| MT-ND2   | 12 | -1.0109273 | 7.29E-17 | 1.33E-12 | 0.17  | 0.844 |
| HIST1H1C | 12 | -1.0159766 | 2.93E-10 | 5.35E-06 | 0.232 | 0.711 |
| CP       | 12 | -1.0177287 | 9.17E-14 | 1.67E-09 | 0.366 | 0.867 |
| CEBPD    | 12 | -1.0243912 | 1.73E-14 | 3.16E-10 | 0.616 | 0.978 |
| FTH1     | 12 | -1.0265911 | 1.88E-19 | 3.42E-15 | 1     | 1     |
| ID1      | 12 | -1.030318  | 1.55E-16 | 2.83E-12 | 0.161 | 0.822 |
| C2orf82  | 12 | -1.0331468 | 1.18E-12 | 2.15E-08 | 0.929 | 1     |
| EID1     | 12 | -1.0389369 | 1.89E-17 | 3.44E-13 | 0.661 | 1     |
| B2M      | 12 | -1.0575482 | 4.73E-19 | 8.63E-15 | 0.991 | 1     |
| MT-CO3   | 12 | -1.0579002 | 1.85E-13 | 3.37E-09 | 0.777 | 0.978 |
| MT-ATP6  | 12 | -1.0605473 | 1.83E-14 | 3.35E-10 | 0.554 | 0.978 |
| MT-ND3   | 12 | -1.0659871 | 1.51E-20 | 2.76E-16 | 0.205 | 0.956 |
| TSC22D1  | 12 | -1.0659871 | 2.83E-13 | 5.16E-09 | 0.357 | 0.889 |
| MT-CO1   | 12 | -1.0919625 | 1.84E-12 | 3.36E-08 | 0.929 | 0.978 |
| MT-CYB   | 12 | -1.1046392 | 6.74E-15 | 1.23E-10 | 0.312 | 0.911 |
| NNMT     | 12 | -1.1119626 | 2.12E-17 | 3.87E-13 | 0.777 | 1     |
| PAX1     | 12 | -1.175127  | 1.81E-19 | 3.30E-15 | 0.33  | 0.956 |
| SLPI     | 12 | -1.1826446 | 5.05E-10 | 9.21E-06 | 0.92  | 1     |
| ACAN     | 12 | -1.1882824 | 4.89E-16 | 8.93E-12 | 0.75  | 1     |
| CD9      | 12 | -1.189262  | 8.38E-18 | 1.53E-13 | 0.241 | 0.867 |
| ID3      | 12 | -1.2623857 | 3.70E-22 | 6.75E-18 | 0.107 | 0.889 |
| MGP      | 12 | -1.2845456 | 6.35E-14 | 1.16E-09 | 1     | 1     |
| CAPS     | 12 | -1.3279968 | 1.65E-14 | 3.01E-10 | 0.473 | 0.978 |
| GPX3     | 12 | -1.3729246 | 8.49E-19 | 1.55E-14 | 0.821 | 1     |
| ADIRF    | 12 | -1.4650827 | 1.75E-15 | 3.19E-11 | 0.348 | 0.889 |
| PLAC9    | 12 | -1.5788724 | 1.40E-21 | 2.55E-17 | 0.357 | 1     |
| MT-CO2   | 12 | -1.5907806 | 4.13E-19 | 7.53E-15 | 0.812 | 1     |
| CLEC3A   | 12 | -1.6562769 | 9.46E-25 | 1.73E-20 | 0.107 | 0.956 |
| OGN      | 12 | -1.7588296 | 2.89E-18 | 5.27E-14 | 0.759 | 1     |

|             |                |                  |              |                  |              |              |
|-------------|----------------|------------------|--------------|------------------|--------------|--------------|
| SPTSSB      | 12             | -1.7791599       | 2.08E-28     | 3.80E-24         | 0.009        | 0.867        |
| FRZB        | 12             | -1.9401718       | 9.41E-19     | 1.72E-14         | 0.223        | 0.911        |
| <b>gene</b> | <b>cluster</b> | <b>avg_logFC</b> | <b>p_val</b> | <b>p_val_adj</b> | <b>pct.1</b> | <b>pct.2</b> |
| TGFBI       | 13             | 1.22776807       | 2.91E-16     | 5.31E-12         | 0.897        | 0.216        |
| SPP1        | 13             | 1.12172313       | 3.26E-10     | 5.96E-06         | 0.598        | 0.039        |
| MT1X        | 13             | 1.08531551       | 3.86E-10     | 7.04E-06         | 1            | 0.922        |
| MT2A        | 13             | 0.95630946       | 5.75E-12     | 1.05E-07         | 1            | 1            |
| HMOX1       | 13             | 0.92440695       | 9.35E-08     | 0.00170629       | 0.619        | 0.176        |
| NRP2        | 13             | 0.69645203       | 2.76E-08     | 0.00050343       | 0.938        | 0.608        |
| FN1         | 13             | 0.63094089       | 1.58E-09     | 2.89E-05         | 1            | 1            |
| GJA1        | 13             | 0.54369572       | 1.65E-06     | 0.03016796       | 0.515        | 0.118        |
| SERPINE2    | 13             | 0.49209459       | 1.63E-06     | 0.02974397       | 1            | 1            |
| PTGES       | 13             | 0.46188081       | 1.10E-06     | 0.02015457       | 0.433        | 0.039        |
| MIF         | 13             | 0.30844324       | 1.70E-06     | 0.03104937       | 1            | 1            |
| NPDC1       | 13             | -0.3335641       | 2.43E-06     | 0.04434323       | 0.113        | 0.451        |
| RPLP0       | 13             | -0.3599503       | 1.14E-08     | 0.00020777       | 1            | 1            |
| SUMO2       | 13             | -0.3632613       | 2.88E-08     | 0.00052538       | 1            | 1            |
| TPT1        | 13             | -0.3843114       | 4.17E-08     | 0.0007601        | 1            | 1            |
| CKAP4       | 13             | -0.4059756       | 2.18E-06     | 0.03980482       | 0.639        | 1            |
| ENAH        | 13             | -0.4135753       | 2.19E-06     | 0.03994926       | 0.216        | 0.588        |
| MT-ND4      | 13             | -0.4153203       | 1.62E-06     | 0.0294743        | 0.959        | 0.941        |
| B2M         | 13             | -0.4184269       | 9.01E-07     | 0.01643954       | 1            | 1            |
| RPL4        | 13             | -0.4258208       | 7.01E-08     | 0.00127991       | 0.99         | 1            |
| GPAA1       | 13             | -0.4312362       | 2.67E-06     | 0.04873465       | 0.567        | 0.863        |
| CSDE1       | 13             | -0.4324808       | 2.36E-07     | 0.00431122       | 0.711        | 0.941        |
| HNRNPA2B1   | 13             | -0.4363168       | 1.98E-06     | 0.03608211       | 0.856        | 1            |
| MOXD1       | 13             | -0.4466054       | 2.65E-08     | 0.00048288       | 0.041        | 0.392        |
| YBX1        | 13             | -0.4544382       | 6.83E-08     | 0.00124552       | 1            | 1            |
| S100A13     | 13             | -0.4577692       | 3.81E-07     | 0.00694846       | 0.969        | 1            |
| ITGB1BP1    | 13             | -0.4813979       | 1.56E-06     | 0.02842178       | 0.742        | 0.902        |
| SRP9        | 13             | -0.4827999       | 2.41E-08     | 0.00043991       | 0.897        | 1            |
| BCL7C       | 13             | -0.484415        | 4.49E-07     | 0.00819876       | 0.691        | 0.922        |
| AHNAK       | 13             | -0.4857935       | 6.75E-07     | 0.01231405       | 0.67         | 0.961        |
| RPS20       | 13             | -0.4907098       | 5.97E-10     | 1.09E-05         | 1            | 1            |
| CALM3       | 13             | -0.4991538       | 5.15E-09     | 9.41E-05         | 0.887        | 0.98         |
| AES         | 13             | -0.5013858       | 7.95E-09     | 0.00014514       | 0.423        | 0.824        |
| TPM3        | 13             | -0.5033559       | 4.12E-07     | 0.00751944       | 0.67         | 0.941        |
| RPS11       | 13             | -0.5039599       | 7.98E-11     | 1.46E-06         | 0.979        | 1            |
| MYL6        | 13             | -0.5270122       | 8.35E-08     | 0.00152319       | 1            | 1            |



|          |    |            |          |            |       |       |
|----------|----|------------|----------|------------|-------|-------|
| NGFRAP1  | 13 | -0.5490192 | 8.36E-08 | 0.00152504 | 0.856 | 0.961 |
| PABPC1   | 13 | -0.5497949 | 1.35E-08 | 0.00024675 | 0.866 | 0.98  |
| TMEM106C | 13 | -0.5886225 | 4.66E-09 | 8.49E-05   | 0.784 | 0.961 |
| LMNA     | 13 | -0.5903339 | 1.88E-07 | 0.00342412 | 0.794 | 0.961 |
| CAV1     | 13 | -0.617352  | 2.16E-06 | 0.03932262 | 0.845 | 0.98  |
| HSPB1    | 13 | -0.6241348 | 3.32E-08 | 0.00060493 | 0.876 | 1     |
| EEF1A1   | 13 | -0.6370148 | 4.86E-08 | 0.00088624 | 1     | 1     |
| NFIC     | 13 | -0.637636  | 4.94E-10 | 9.01E-06   | 0.608 | 0.882 |
| ARPC1B   | 13 | -0.6403885 | 3.55E-08 | 0.00064695 | 0.794 | 0.961 |
| MT-ND3   | 13 | -0.6428853 | 7.08E-08 | 0.00129197 | 0.691 | 0.882 |
| MT-CO1   | 13 | -0.6484255 | 1.86E-09 | 3.39E-05   | 0.938 | 0.922 |
| PTMS     | 13 | -0.6571917 | 5.69E-08 | 0.00103853 | 0.845 | 1     |
| DYNLL1   | 13 | -0.6647309 | 1.24E-08 | 0.00022592 | 0.979 | 0.98  |
| SH3BGRL3 | 13 | -0.6680482 | 8.74E-07 | 0.0159429  | 0.99  | 1     |
| S100A10  | 13 | -0.6694827 | 1.44E-10 | 2.63E-06   | 1     | 1     |
| PRKCDBP  | 13 | -0.6754808 | 3.69E-07 | 0.0067343  | 0.784 | 0.98  |
| MT-ATP6  | 13 | -0.6822384 | 3.25E-08 | 0.000593   | 0.907 | 0.941 |
| MT-CO3   | 13 | -0.6854108 | 1.05E-08 | 0.00019174 | 0.918 | 0.941 |
| THY1     | 13 | -0.686656  | 8.12E-08 | 0.00148179 | 0.68  | 0.961 |
| S100A6   | 13 | -0.7066888 | 2.91E-10 | 5.32E-06   | 1     | 1     |
| PAX1     | 13 | -0.7135029 | 9.14E-09 | 0.00016682 | 0.495 | 0.824 |
| S100A1   | 13 | -0.7572957 | 1.26E-06 | 0.02308039 | 0.804 | 0.941 |
| MALL     | 13 | -0.7595222 | 3.03E-09 | 5.53E-05   | 0.485 | 0.882 |
| MT-ND1   | 13 | -0.7786869 | 2.97E-10 | 5.42E-06   | 0.711 | 0.922 |
| MT-CYB   | 13 | -0.7920485 | 4.22E-09 | 7.69E-05   | 0.763 | 0.922 |
| CAPS     | 13 | -0.7952923 | 1.84E-06 | 0.03355371 | 0.34  | 0.706 |
| FTH1     | 13 | -0.7955116 | 2.08E-15 | 3.79E-11   | 1     | 1     |
| PTRF     | 13 | -0.7963952 | 7.31E-12 | 1.33E-07   | 0.732 | 0.961 |
| IGFBP6   | 13 | -0.805925  | 6.74E-08 | 0.00122998 | 0.526 | 0.824 |
| MT-ND2   | 13 | -0.8338153 | 2.85E-09 | 5.21E-05   | 0.763 | 0.922 |
| SLC9A3R2 | 13 | -0.8377251 | 3.88E-07 | 0.00708539 | 0.526 | 0.765 |
| PLAC9    | 13 | -0.8428371 | 1.03E-08 | 0.00018739 | 0.526 | 0.941 |
| LOXL1    | 13 | -0.8812964 | 2.61E-11 | 4.77E-07   | 0.258 | 0.745 |
| CITED2   | 13 | -0.8858315 | 1.27E-06 | 0.02314792 | 0.196 | 0.549 |
| PRSS23   | 13 | -1.1640738 | 2.55E-09 | 4.66E-05   | 0.701 | 0.902 |
| ADIRF    | 13 | -1.3739637 | 5.73E-16 | 1.05E-11   | 0.433 | 0.941 |
| MSMP     | 13 | -1.8072689 | 6.26E-10 | 1.14E-05   | 0.134 | 0.608 |
