# Supplementary material for: Single-Cell RNA-Seq Analysis of Cells from Degenerating and Non-Degenerating Intervertebral Discs from the Same Individual Reveals New Biomarkers for Intervertebral Disc Degeneration
Source: MDPI journal article supplement (doi:10.3390/ijms23073993), 2022-04-03
Supplement: s1 [file s1]

**Table S10:** Differentially expressed genes between NPnD and AFnD per cluster.

| gene          | cluster  | avg_logFC         | p_val           | p_val_adj       | pct.1        | pct.2        |
|---------------|----------|-------------------|-----------------|-----------------|--------------|--------------|
| <b>MGP</b>    | <b>0</b> | <b>0.25179672</b> | <b>2.17E-11</b> | <b>3.96E-07</b> | <b>1</b>     | <b>1</b>     |
| MT1G          | 0        | -0.2522361        | 1.81E-07        | 3.31E-03        | 0.846        | 0.898        |
| MT-ND4        | 0        | -0.2527034        | 4.45E-07        | 8.12E-03        | 0.892        | 0.905        |
| HLA-C         | 0        | -0.254313         | 3.66E-14        | 6.69E-10        | 0.932        | 0.966        |
| ALDOA         | 0        | -0.2575857        | 1.30E-20        | 2.37E-16        | 0.997        | 0.997        |
| MT-CO1        | 0        | -0.2599458        | 4.34E-07        | 7.91E-03        | 0.913        | 0.909        |
| PLK2          | 0        | -0.2631184        | 6.80E-10        | 1.24E-05        | 0.095        | 0.213        |
| COL6A2        | 0        | -0.2748108        | 6.74E-11        | 1.23E-06        | 0.521        | 0.654        |
| ACTG1         | 0        | -0.2749259        | 9.35E-14        | 1.71E-09        | 0.996        | 0.998        |
| CHRD12        | 0        | -0.2771136        | 6.49E-07        | 1.19E-02        | 0.288        | 0.403        |
| HOXC10        | 0        | -0.2791711        | 7.67E-18        | 1.40E-13        | 0.659        | 0.847        |
| BNIP3         | 0        | -0.2818963        | 3.22E-15        | 5.88E-11        | 0.985        | 0.997        |
| MT-CO2        | 0        | -0.2820203        | 8.29E-09        | 1.51E-04        | 0.919        | 0.917        |
| HLA-B         | 0        | -0.2998163        | 3.28E-17        | 5.98E-13        | 0.826        | 0.919        |
| MT1E          | 0        | -0.3061218        | 4.38E-11        | 7.99E-07        | 0.935        | 0.964        |
| ENO1          | 0        | -0.3173622        | 5.51E-18        | 1.01E-13        | 0.972        | 0.983        |
| SQSTM1        | 0        | -0.3204348        | 1.34E-13        | 2.45E-09        | 0.909        | 0.957        |
| PGK1          | 0        | -0.3306687        | 7.39E-18        | 1.35E-13        | 0.778        | 0.878        |
| HLA-A         | 0        | -0.354205         | 1.10E-20        | 2.01E-16        | 0.949        | 0.981        |
| MT-ND3        | 0        | -0.4309323        | 2.71E-16        | 4.95E-12        | 0.752        | 0.809        |
| SOD2          | 0        | -0.5273723        | 1.23E-10        | 2.24E-06        | 0.932        | 0.966        |
| MMP3          | 0        | -0.5289701        | 7.08E-20        | 1.29E-15        | 0.554        | 0.785        |
| gene          | cluster  | avg_logFC         | p_val           | p_val_adj       | pct.1        | pct.2        |
| <b>MSMP</b>   | <b>1</b> | <b>0.53596609</b> | <b>3.42E-11</b> | <b>6.25E-07</b> | <b>0.4</b>   | <b>0.246</b> |
| <b>MGP</b>    | <b>1</b> | <b>0.39342773</b> | <b>1.81E-21</b> | <b>3.31E-17</b> | <b>1</b>     | <b>1</b>     |
| <b>CHI3L1</b> | <b>1</b> | <b>0.31733529</b> | <b>4.36E-09</b> | <b>7.96E-05</b> | <b>0.963</b> | <b>0.949</b> |
| OGN           | 1        | -0.2516232        | 6.83E-15        | 1.25E-10        | 0.994        | 1            |
| MT-CO3        | 1        | -0.2530107        | 6.26E-11        | 1.14E-06        | 0.938        | 0.948        |
| MT-ND2        | 1        | -0.2565422        | 9.68E-08        | 1.77E-03        | 0.855        | 0.857        |
| MT-CO2        | 1        | -0.2645567        | 6.49E-12        | 1.18E-07        | 0.963        | 0.972        |
| MT1F          | 1        | -0.2684973        | 6.78E-07        | 1.24E-02        | 0.889        | 0.937        |
| SCRG1         | 1        | -0.2685539        | 5.19E-13        | 9.46E-09        | 0.997        | 1            |
| SOD2          | 1        | -0.271484         | 2.31E-06        | 4.21E-02        | 0.811        | 0.894        |
| MT-CO1        | 1        | -0.277389         | 1.62E-13        | 2.95E-09        | 0.963        | 0.969        |
| HOXC10        | 1        | -0.2801914        | 9.93E-18        | 1.81E-13        | 0.712        | 0.84         |
| PGK1          | 1        | -0.3106968        | 1.20E-19        | 2.19E-15        | 0.842        | 0.934        |

| MT1G    | 1       | -0.3193095 | 2.17E-08 | 3.96E-04   | 0.855 | 0.932 |
|---------|---------|------------|----------|------------|-------|-------|
| LECT1   | 1       | -0.3367349 | 1.54E-18 | 2.82E-14   | 0.978 | 0.988 |
| MT1E    | 1       | -0.345454  | 2.10E-15 | 3.83E-11   | 0.959 | 0.982 |
| COL2A1  | 1       | -0.3747145 | 3.82E-07 | 6.97E-03   | 0.952 | 0.969 |
| MMP3    | 1       | -0.3875493 | 4.11E-14 | 7.50E-10   | 0.643 | 0.826 |
| MT-ND3  | 1       | -0.432511  | 1.18E-25 | 2.15E-21   | 0.873 | 0.897 |
| gene    | cluster | avg_logFC  | p_val    | p_val_adj  | pct.1 | pct.2 |
| MGP     | 2       | 0.33751931 | 3.14E-08 | 5.72E-04   | 1     | 1     |
| C2orf40 | 2       | 0.26541059 | 2.37E-06 | 4.32E-02   | 1     | 0.997 |
| MT1X    | 2       | -0.2695427 | 6.58E-10 | 1.20E-05   | 1     | 1     |
| RPS11   | 2       | -0.2734398 | 1.52E-30 | 2.78E-26   | 1     | 1     |
| MT-ND3  | 2       | -0.3111312 | 1.28E-08 | 2.34E-04   | 0.925 | 0.91  |
| MT1E    | 2       | -0.3132891 | 2.90E-16 | 5.29E-12   | 1     | 1     |
| CP      | 2       | -0.3142365 | 6.97E-13 | 1.27E-08   | 0.837 | 0.963 |
| CTGF    | 2       | -0.4243629 | 2.92E-10 | 5.32E-06   | 0.429 | 0.641 |
| gene    | cluster | avg_logFC  | p_val    | p_val_adj  | pct.1 | pct.2 |
| ID3     | 3       | 0.38643431 | 1.16E-07 | 2.12E-03   | 0.774 | 0.625 |
| ID1     | 3       | 0.36510218 | 9.12E-08 | 1.66E-03   | 0.77  | 0.566 |
| TMED2   | 3       | 0.31422054 | 7.62E-10 | 1.39E-05   | 0.871 | 0.73  |
| ACTG1   | 3       | -0.2572653 | 5.65E-07 | 1.03E-02   | 0.997 | 0.992 |
| TPI1    | 3       | -0.2580728 | 5.32E-10 | 9.71E-06   | 0.979 | 0.984 |
| AIMP1   | 3       | -0.2684555 | 8.01E-07 | 1.46E-02   | 0.491 | 0.633 |
| GAPDH   | 3       | -0.2711251 | 1.28E-15 | 2.33E-11   | 1     | 1     |
| ANKRD12 | 3       | -0.2726962 | 1.54E-07 | 2.81E-03   | 0.397 | 0.586 |
| WSB1    | 3       | -0.2731992 | 1.58E-06 | 2.88E-02   | 0.69  | 0.824 |
| RNF114  | 3       | -0.2778101 | 7.46E-08 | 0.00136106 | 0.446 | 0.621 |
| ACTB    | 3       | -0.2802378 | 4.71E-07 | 0.00859642 | 0.937 | 0.988 |
| PMP22   | 3       | -0.2815847 | 9.97E-07 | 0.01818905 | 0.666 | 0.777 |
| ZNF385D | 3       | -0.2922713 | 4.94E-08 | 0.00090227 | 0.627 | 0.754 |
| LDHA    | 3       | -0.2989846 | 2.77E-10 | 5.05E-06   | 0.997 | 1     |
| CRTAC1  | 3       | -0.3028959 | 9.87E-07 | 0.0180035  | 0.216 | 0.395 |
| EIF4A2  | 3       | -0.3068387 | 5.63E-09 | 1.03E-04   | 0.962 | 0.996 |
| WBP2    | 3       | -0.3102784 | 4.16E-08 | 7.58E-04   | 0.481 | 0.633 |
| MT-ND4  | 3       | -0.3107791 | 6.75E-08 | 1.23E-03   | 0.972 | 0.977 |
| EIF1    | 3       | -0.3148073 | 7.74E-19 | 1.41E-14   | 1     | 1     |
| SH3BP5  | 3       | -0.3272633 | 1.23E-10 | 2.25E-06   | 0.244 | 0.488 |
| PTX3    | 3       | -0.3340527 | 9.23E-07 | 1.68E-02   | 0.105 | 0.266 |
| CCDC85B | 3       | -0.3365896 | 6.49E-08 | 1.18E-03   | 0.666 | 0.797 |
| BNIP3   | 3       | -0.3406309 | 1.98E-09 | 3.61E-05   | 0.958 | 0.988 |

| PSAP     | 3       | -0.3415155 | 2.51E-12 | 4.58E-08   | 0.937 | 0.977 |
|----------|---------|------------|----------|------------|-------|-------|
| ALDOA    | 3       | -0.3478536 | 3.74E-16 | 6.82E-12   | 0.99  | 0.992 |
| MT-ND3   | 3       | -0.3503084 | 7.92E-09 | 1.45E-04   | 0.889 | 0.93  |
| HLA-C    | 3       | -0.3523517 | 1.08E-09 | 1.96E-05   | 0.909 | 0.961 |
| HNRNPC   | 3       | -0.3572758 | 7.99E-13 | 1.46E-08   | 0.805 | 0.91  |
| SLC3A2   | 3       | -0.3689898 | 7.61E-11 | 1.39E-06   | 0.202 | 0.438 |
| MMP3     | 3       | -0.3764307 | 5.74E-09 | 1.05E-04   | 0.822 | 0.949 |
| HLA-A    | 3       | -0.3792713 | 9.05E-10 | 1.65E-05   | 0.909 | 0.977 |
| S100A4   | 3       | -0.3931186 | 1.00E-06 | 1.83E-02   | 0.721 | 0.867 |
| HIF-1a   | 3       | -0.4019868 | 4.57E-12 | 8.33E-08   | 0.749 | 0.879 |
| HSD17B14 | 3       | -0.4057964 | 6.98E-11 | 1.27E-06   | 0.303 | 0.52  |
| PRELP    | 3       | -0.4114668 | 2.08E-07 | 3.79E-03   | 0.951 | 0.977 |
| NR1D1    | 3       | -0.4117812 | 5.28E-10 | 9.63E-06   | 0.247 | 0.48  |
| CTSL     | 3       | -0.4181372 | 1.11E-09 | 2.03E-05   | 0.422 | 0.613 |
| HLA-B    | 3       | -0.4224948 | 7.47E-12 | 1.36E-07   | 0.742 | 0.898 |
| PKM      | 3       | -0.4257168 | 3.71E-12 | 6.77E-08   | 0.913 | 0.98  |
| MIF      | 3       | -0.4274285 | 2.82E-23 | 5.14E-19   | 0.997 | 1     |
| MRPS6    | 3       | -0.4521581 | 4.39E-08 | 0.00080182 | 0.878 | 0.93  |
| MT1E     | 3       | -0.4524023 | 1.79E-07 | 0.00327009 | 1     | 1     |
| FBXO32   | 3       | -0.4645763 | 2.51E-10 | 4.59E-06   | 0.111 | 0.324 |
| ENO1     | 3       | -0.5330728 | 8.35E-18 | 1.52E-13   | 0.93  | 0.988 |
| PGK1     | 3       | -0.5593427 | 6.94E-20 | 1.27E-15   | 0.76  | 0.938 |
| SQSTM1   | 3       | -0.5995085 | 2.50E-17 | 4.56E-13   | 0.93  | 0.973 |
| SOD2     | 3       | -0.6077706 | 1.23E-16 | 2.24E-12   | 0.993 | 0.996 |
| WTAP     | 3       | -0.612426  | 5.62E-09 | 1.03E-04   | 0.774 | 0.84  |
| ADM      | 3       | -0.6196359 | 1.85E-06 | 3.38E-02   | 0.564 | 0.68  |
| ZFP36L1  | 3       | -0.7304534 | 2.76E-07 | 5.04E-03   | 0.436 | 0.59  |
| LCN2     | 3       | -0.8512432 | 9.01E-10 | 1.64E-05   | 0.627 | 0.781 |
| gene     | cluster | avg_logFC  | p_val    | p_val_adj  | pct.1 | pct.2 |
| MSMP     | 4       | 0.59206369 | 5.62E-08 | 1.03E-03   | 0.495 | 0.297 |
| SH3BGRL3 | 4       | 0.30376821 | 1.79E-09 | 3.28E-05   | 0.976 | 0.932 |
| CP       | 4       | -0.2504612 | 2.31E-07 | 4.21E-03   | 0.841 | 0.919 |
| NNMT     | 4       | -0.2530077 | 7.05E-08 | 1.29E-03   | 0.949 | 0.98  |
| RPS11    | 4       | -0.2596472 | 4.17E-24 | 7.61E-20   | 1     | 1     |
| PRELP    | 4       | -0.2723925 | 7.04E-07 | 1.29E-02   | 0.962 | 0.98  |
| MT1E     | 4       | -0.3202198 | 1.96E-06 | 3.57E-02   | 0.957 | 0.99  |
| HLA-A    | 4       | -0.329627  | 6.54E-13 | 1.19E-08   | 0.911 | 0.966 |
| HLA-B    | 4       | -0.3485507 | 1.61E-14 | 2.94E-10   | 0.789 | 0.939 |
| OGN      | 4       | -0.3694091 | 1.01E-10 | 1.84E-06   | 0.997 | 1     |

| MT-ND3  | 4       | -0.4252319 | 4.77E-20 | 8.70E-16  | 0.949 | 0.932 |
|---------|---------|------------|----------|-----------|-------|-------|
| LECT1   | 4       | -0.4377333 | 5.45E-14 | 9.95E-10  | 0.914 | 0.97  |
| gene    | cluster | avg_logFC  | p_val    | p_val_adj | pct.1 | pct.2 |
| MGP     | 5       | 0.43998162 | 1.63E-10 | 2.97E-06  | 1     | 1     |
| RPS11   | 5       | -0.2553599 | 3.74E-20 | 6.83E-16  | 1     | 1     |
| CP      | 5       | -0.2624913 | 3.08E-07 | 5.63E-03  | 0.852 | 0.93  |
| MIF     | 5       | -0.2627767 | 2.64E-10 | 4.81E-06  | 0.996 | 1     |
| FMOD    | 5       | -0.2660912 | 1.02E-09 | 1.86E-05  | 0.965 | 0.996 |
| PGK1    | 5       | -0.2927694 | 6.56E-07 | 1.20E-02  | 0.831 | 0.934 |
| BNIP3   | 5       | -0.2986971 | 2.50E-08 | 4.56E-04  | 1     | 0.996 |
| WSB1    | 5       | -0.3182608 | 2.18E-09 | 3.98E-05  | 0.623 | 0.797 |
| CCDC80  | 5       | -0.3331481 | 2.03E-08 | 3.71E-04  | 0.965 | 0.973 |
| CTGF    | 5       | -0.4279264 | 6.09E-07 | 1.11E-02  | 0.419 | 0.617 |
| MT-ND1  | 5       | -0.4530368 | 1.87E-10 | 3.42E-06  | 0.574 | 0.781 |
| MT-ATP6 | 5       | -0.4587192 | 1.10E-11 | 2.01E-07  | 0.718 | 0.898 |
| MT-ND2  | 5       | -0.4635159 | 4.68E-09 | 8.54E-05  | 0.627 | 0.785 |
| MT-CO3  | 5       | -0.4667023 | 5.76E-12 | 1.05E-07  | 0.778 | 0.934 |
| MT-ND4  | 5       | -0.5260146 | 2.26E-14 | 4.12E-10  | 0.831 | 0.953 |
| MT-CYB  | 5       | -0.5748444 | 2.47E-15 | 4.51E-11  | 0.683 | 0.875 |
| MT-CO2  | 5       | -0.6003844 | 2.23E-16 | 4.06E-12  | 0.838 | 0.965 |
| MT-CO1  | 5       | -0.6137221 | 2.25E-16 | 4.11E-12  | 0.842 | 0.969 |
| MT-ND3  | 5       | -0.6397894 | 5.57E-17 | 1.02E-12  | 0.637 | 0.871 |
| gene    | cluster | avg_logFC  | p_val    | p_val_adj | pct.1 | pct.2 |
| ENO1    | 6       | -0.4568745 | 2.06E-06 | 3.75E-02  | 0.982 | 1     |
| gene    | cluster | avg_logFC  | p_val    | p_val_adj | pct.1 | pct.2 |
| MT-CO2  | 7       | -0.2576745 | 2.85E-07 | 5.20E-03  | 0.984 | 0.988 |
| VKORC1  | 7       | -0.2578301 | 1.41E-06 | 2.57E-02  | 0.996 | 1     |
| PDIA3   | 7       | -0.2788365 | 2.39E-06 | 4.36E-02  | 0.589 | 0.734 |
| ITM2B   | 7       | -0.2840279 | 2.09E-06 | 3.81E-02  | 0.837 | 0.925 |
| TMEM59  | 7       | -0.3041115 | 5.68E-07 | 1.04E-02  | 0.825 | 0.896 |
| PPIC    | 7       | -0.316072  | 1.84E-08 | 3.36E-04  | 0.894 | 0.965 |
| CD63    | 7       | -0.3311561 | 8.18E-09 | 1.49E-04  | 0.996 | 1     |
| HLA-C   | 7       | -0.338294  | 7.55E-07 | 1.38E-02  | 0.671 | 0.827 |
| PRELP   | 7       | -0.3403027 | 6.72E-07 | 1.23E-02  | 0.78  | 0.884 |
| MT-ND2  | 7       | -0.3420792 | 5.42E-11 | 9.88E-07  | 0.967 | 0.988 |
| HLA-B   | 7       | -0.3565343 | 3.56E-07 | 6.50E-03  | 0.492 | 0.682 |
| SPARC   | 7       | -0.3743277 | 2.60E-10 | 4.74E-06  | 0.992 | 0.994 |
| COL3A1  | 7       | -0.4226575 | 2.31E-06 | 4.22E-02  | 0.614 | 0.775 |
| IGFBP7  | 7       | -0.4227234 | 1.52E-08 | 2.78E-04  | 0.915 | 0.983 |

|             |                |                  |              |                  |              |              |
|-------------|----------------|------------------|--------------|------------------|--------------|--------------|
| SCRG1       | 7              | -0.449223        | 1.09E-07     | 1.99E-03         | 0.967        | 0.994        |
| HLA-A       | 7              | -0.4515007       | 8.62E-11     | 1.57E-06         | 0.671        | 0.855        |
| MT-ND3      | 7              | -0.4578881       | 1.99E-23     | 3.63E-19         | 0.972        | 0.988        |
| COL9A3      | 7              | -0.5284739       | 4.95E-07     | 9.04E-03         | 0.512        | 0.711        |
| <b>gene</b> | <b>cluster</b> | <b>avg_logFC</b> | <b>p_val</b> | <b>p_val_adj</b> | <b>pct.1</b> | <b>pct.2</b> |
| RPS11       | 8              | -0.2716817       | 3.31E-18     | 6.03E-14         | 1            | 1            |
| SPARC       | 8              | -0.2899288       | 1.69E-06     | 3.08E-02         | 0.962        | 1            |
| CCDC80      | 8              | -0.3016224       | 1.34E-07     | 2.44E-03         | 0.837        | 0.939        |
| COL11A1     | 8              | -0.3104508       | 7.70E-09     | 1.40E-04         | 0.989        | 1            |
| MT-CYB      | 8              | -0.3112126       | 2.09E-06     | 3.81E-02         | 0.97         | 0.949        |
| COL9A2      | 8              | -0.3174083       | 1.10E-06     | 2.01E-02         | 0.697        | 0.838        |
| MT-ND3      | 8              | -0.3306738       | 4.22E-08     | 7.70E-04         | 0.962        | 0.949        |
| COL2A1      | 8              | -0.4068242       | 2.85E-09     | 5.20E-05         | 1            | 1            |
| <b>gene</b> | <b>cluster</b> | <b>avg_logFC</b> | <b>p_val</b> | <b>p_val_adj</b> | <b>pct.1</b> | <b>pct.2</b> |
| MT-CO3      | 9              | -0.4564641       | 4.47E-07     | 8.16E-03         | 0.955        | 0.976        |
| MT-ND3      | 9              | -0.5405621       | 6.49E-08     | 1.18E-03         | 0.91         | 0.964        |
| <b>gene</b> | <b>cluster</b> | <b>avg_logFC</b> | <b>p_val</b> | <b>p_val_adj</b> | <b>pct.1</b> | <b>pct.2</b> |
| EIF4B       | 10             | -0.5040037       | 7.42E-07     | 1.35E-02         | 0.929        | 0.98         |
| <b>gene</b> | <b>cluster</b> | <b>avg_logFC</b> | <b>p_val</b> | <b>p_val_adj</b> | <b>pct.1</b> | <b>pct.2</b> |
| MT-ND3      | 11             | -0.9650522       | 4.12E-07     | 7.51E-03         | 0.193        | 0.545        |
| MT-ND2      | 11             | -1.2057694       | 5.41E-08     | 9.88E-04         | 0.239        | 0.621        |

**Table S11:** Differentially expressed genes between NPD and AFD per cluster.

| gene         | cluster | avg_logFC  | p_val    | p_val_adj  | pct.1 | pct.2 |
|--------------|---------|------------|----------|------------|-------|-------|
| HMGA1        | 0       | 0.87400514 | 5.82E-78 | 1.06E-73   | 0.858 | 0.404 |
| CD55         | 0       | 0.71161478 | 1.28E-61 | 2.34E-57   | 0.922 | 0.662 |
| CXCL8        | 0       | 0.6888357  | 8.20E-13 | 1.50E-08   | 0.182 | 0.051 |
| TIMP3        | 0       | 0.57563956 | 5.21E-25 | 9.50E-21   | 0.749 | 0.52  |
| C11orf96     | 0       | 0.54331093 | 4.16E-24 | 7.59E-20   | 0.528 | 0.285 |
| MT2A         | 0       | 0.52415206 | 3.11E-25 | 5.68E-21   | 1     | 1     |
| TM4SF1       | 0       | 0.49871341 | 1.08E-26 | 1.97E-22   | 0.777 | 0.484 |
| NRP2         | 0       | 0.49745642 | 5.95E-19 | 1.09E-14   | 0.606 | 0.403 |
| SMOX         | 0       | 0.46728082 | 7.60E-18 | 1.39E-13   | 0.581 | 0.404 |
| RGCC         | 0       | 0.45226257 | 6.48E-20 | 1.18E-15   | 0.911 | 0.751 |
| UPP1         | 0       | 0.41786366 | 1.14E-27 | 2.09E-23   | 0.875 | 0.621 |
| GSTO1        | 0       | 0.36269994 | 4.82E-27 | 8.80E-23   | 0.906 | 0.738 |
| TMSB4X       | 0       | 0.35804218 | 3.97E-07 | 0.00725004 | 0.841 | 0.726 |
| SPP1         | 0       | 0.35356897 | 2.68E-06 | 0.04895527 | 0.897 | 0.753 |
| SNHG12       | 0       | 0.34435728 | 3.36E-17 | 6.13E-13   | 0.743 | 0.605 |
| S100A10      | 0       | 0.33748103 | 1.07E-16 | 1.95E-12   | 0.987 | 0.939 |
| TMSB10       | 0       | 0.32759749 | 2.65E-20 | 4.84E-16   | 0.996 | 0.993 |
| NBEAL1       | 0       | 0.31576574 | 2.72E-28 | 4.96E-24   | 0.996 | 0.986 |
| TGM2         | 0       | 0.30043324 | 1.69E-15 | 3.09E-11   | 0.504 | 0.312 |
| EPB41L4A-AS1 | 0       | 0.29836863 | 2.50E-24 | 4.56E-20   | 0.964 | 0.897 |
| ANXA1        | 0       | 0.28346429 | 1.32E-08 | 0.00024075 | 0.716 | 0.63  |
| ZFAS1        | 0       | 0.28289146 | 2.49E-35 | 4.55E-31   | 1     | 0.996 |
| CTSL         | 0       | 0.28283214 | 9.45E-08 | 0.00172482 | 0.809 | 0.659 |
| PDLIM4       | 0       | 0.27474884 | 4.58E-15 | 8.35E-11   | 0.87  | 0.76  |
| AC090498.1   | 0       | 0.26079516 | 1.25E-48 | 2.27E-44   | 1     | 1     |
| TAF1D        | 0       | 0.26062799 | 1.43E-12 | 2.61E-08   | 0.706 | 0.599 |
| CCND1        | 0       | 0.25723181 | 1.57E-09 | 2.87E-05   | 0.424 | 0.283 |
| RELB         | 0       | 0.25441688 | 3.17E-10 | 5.78E-06   | 0.566 | 0.417 |
| GPX4         | 0       | 0.25281092 | 3.16E-18 | 5.77E-14   | 0.997 | 0.978 |
| SH3BGRL3     | 0       | 0.25151785 | 5.75E-17 | 1.05E-12   | 0.991 | 0.977 |
| PKM          | 0       | -0.2511766 | 5.55E-13 | 1.01E-08   | 0.861 | 0.908 |
| CALM2        | 0       | -0.2545043 | 4.56E-16 | 8.32E-12   | 0.938 | 0.975 |
| HAPLN1       | 0       | -0.2550567 | 1.61E-09 | 2.94E-05   | 0.44  | 0.59  |
| MDFI         | 0       | -0.2553418 | 4.31E-11 | 7.87E-07   | 0.15  | 0.287 |
| CDK5RAP2     | 0       | -0.2562409 | 1.71E-09 | 3.11E-05   | 0.166 | 0.305 |
| FCGRT        | 0       | -0.2565341 | 1.28E-17 | 2.33E-13   | 0.286 | 0.507 |

|         |   |            |          |            |       |       |
|---------|---|------------|----------|------------|-------|-------|
| SNRPN   | 0 | -0.2583813 | 1.58E-15 | 2.89E-11   | 0.565 | 0.731 |
| DYNLL1  | 0 | -0.2624758 | 6.71E-15 | 1.22E-10   | 0.743 | 0.884 |
| ID4     | 0 | -0.2651441 | 8.84E-07 | 0.01612431 | 0.288 | 0.401 |
| DDR2    | 0 | -0.2656216 | 1.80E-18 | 3.28E-14   | 0.184 | 0.397 |
| MT-ND2  | 0 | -0.2688783 | 1.57E-13 | 2.87E-09   | 0.31  | 0.502 |
| MT-ND3  | 0 | -0.269583  | 1.95E-11 | 3.56E-07   | 0.314 | 0.489 |
| CCNG2   | 0 | -0.2714739 | 1.34E-12 | 2.45E-08   | 0.39  | 0.558 |
| CDO1    | 0 | -0.2732633 | 1.19E-17 | 2.17E-13   | 0.093 | 0.269 |
| TPM2    | 0 | -0.2734079 | 1.09E-19 | 1.99E-15   | 0.269 | 0.509 |
| CALR    | 0 | -0.273456  | 7.10E-17 | 1.30E-12   | 0.391 | 0.594 |
| B2M     | 0 | -0.2737571 | 1.27E-21 | 2.31E-17   | 0.958 | 0.995 |
| NT5C3A  | 0 | -0.2737897 | 5.54E-10 | 1.01E-05   | 0.316 | 0.46  |
| CTHRC1  | 0 | -0.2779223 | 3.59E-11 | 6.56E-07   | 0.314 | 0.484 |
| LSP1    | 0 | -0.2781954 | 3.38E-22 | 6.16E-18   | 0.092 | 0.296 |
| MT-CYB  | 0 | -0.2784171 | 5.03E-12 | 9.17E-08   | 0.361 | 0.527 |
| NNMT    | 0 | -0.2812719 | 1.23E-10 | 2.25E-06   | 0.782 | 0.854 |
| FTL     | 0 | -0.28467   | 3.00E-34 | 5.48E-30   | 1     | 1     |
| PTMS    | 0 | -0.2851974 | 1.67E-12 | 3.05E-08   | 0.332 | 0.502 |
| EPYC    | 0 | -0.2861632 | 2.09E-25 | 3.82E-21   | 0.029 | 0.206 |
| PABPC1  | 0 | -0.2900105 | 5.77E-17 | 1.05E-12   | 0.755 | 0.877 |
| TPI1    | 0 | -0.2904195 | 4.72E-20 | 8.61E-16   | 0.983 | 0.998 |
| CRIP1   | 0 | -0.2906448 | 1.12E-24 | 2.05E-20   | 0.146 | 0.392 |
| CALD1   | 0 | -0.2919546 | 2.00E-16 | 3.64E-12   | 0.369 | 0.592 |
| COL11A2 | 0 | -0.2924296 | 9.39E-19 | 1.71E-14   | 0.198 | 0.408 |
| MT1E    | 0 | -0.2928024 | 1.24E-08 | 0.0002264  | 0.934 | 0.94  |
| P4HA1   | 0 | -0.2934236 | 2.86E-17 | 5.22E-13   | 0.462 | 0.666 |
| FGF7    | 0 | -0.2934463 | 1.59E-07 | 0.00289272 | 0.09  | 0.188 |
| FOSL1   | 0 | -0.2949119 | 3.25E-08 | 0.00059319 | 0.284 | 0.417 |
| PPP1R3C | 0 | -0.2967752 | 8.44E-13 | 1.54E-08   | 0.221 | 0.381 |
| HLA-A   | 0 | -0.2973082 | 3.09E-18 | 5.63E-14   | 0.764 | 0.87  |
| MMP3    | 0 | -0.2982117 | 6.33E-10 | 1.15E-05   | 0.79  | 0.883 |
| SAT1    | 0 | -0.300481  | 6.88E-20 | 1.25E-15   | 0.943 | 0.98  |
| EEF2    | 0 | -0.3021791 | 7.21E-25 | 1.32E-20   | 0.979 | 0.998 |
| TMEM59  | 0 | -0.3023766 | 2.59E-21 | 4.72E-17   | 0.955 | 0.982 |
| MAOB    | 0 | -0.3071898 | 1.07E-19 | 1.96E-15   | 0.2   | 0.422 |
| CD320   | 0 | -0.3093058 | 6.13E-27 | 1.12E-22   | 0.186 | 0.451 |
| IGFBP6  | 0 | -0.3107711 | 3.25E-09 | 5.93E-05   | 0.302 | 0.442 |
| PNRC1   | 0 | -0.3114555 | 2.20E-14 | 4.02E-10   | 0.923 | 0.955 |
| GSN     | 0 | -0.3141919 | 1.14E-22 | 2.08E-18   | 0.235 | 0.482 |

|          |   |            |          |            |       |       |
|----------|---|------------|----------|------------|-------|-------|
| EEF1A1   | 0 | -0.3143059 | 2.46E-57 | 4.48E-53   | 1     | 1     |
| COL6A2   | 0 | -0.3151065 | 1.53E-19 | 2.78E-15   | 0.344 | 0.561 |
| MT-ND1   | 0 | -0.3177474 | 3.55E-10 | 6.47E-06   | 0.272 | 0.417 |
| SLC16A3  | 0 | -0.3178981 | 7.42E-16 | 1.35E-11   | 0.306 | 0.505 |
| PLD3     | 0 | -0.3180703 | 7.25E-24 | 1.32E-19   | 0.237 | 0.495 |
| FAM162A  | 0 | -0.3190679 | 1.35E-18 | 2.47E-14   | 0.927 | 0.957 |
| BTG1     | 0 | -0.3206918 | 9.91E-12 | 1.81E-07   | 0.968 | 0.989 |
| PPP3CA   | 0 | -0.3237946 | 1.49E-15 | 2.73E-11   | 0.858 | 0.93  |
| ID2      | 0 | -0.3244189 | 3.56E-13 | 6.49E-09   | 0.306 | 0.484 |
| C4orf3   | 0 | -0.3259735 | 2.18E-29 | 3.97E-25   | 0.968 | 0.991 |
| PGK1     | 0 | -0.3308867 | 1.88E-19 | 3.43E-15   | 0.958 | 0.953 |
| NAMPT    | 0 | -0.3345797 | 4.76E-15 | 8.68E-11   | 0.537 | 0.697 |
| CTSF     | 0 | -0.3347353 | 8.36E-39 | 1.53E-34   | 0.073 | 0.357 |
| S100A4   | 0 | -0.3354836 | 3.03E-09 | 5.52E-05   | 0.533 | 0.65  |
| BNIP3    | 0 | -0.3377216 | 1.10E-18 | 2.00E-14   | 0.995 | 0.998 |
| SERPINA1 | 0 | -0.3380581 | 1.06E-16 | 1.93E-12   | 0.924 | 0.975 |
| AEBP1    | 0 | -0.3428151 | 9.89E-19 | 1.80E-14   | 0.455 | 0.668 |
| RHOBTB3  | 0 | -0.3463275 | 7.85E-17 | 1.43E-12   | 0.249 | 0.451 |
| DDIT4    | 0 | -0.3467532 | 1.26E-20 | 2.29E-16   | 0.308 | 0.558 |
| SDC2     | 0 | -0.3513917 | 1.87E-22 | 3.41E-18   | 0.577 | 0.778 |
| IFITM1   | 0 | -0.3514496 | 7.84E-20 | 1.43E-15   | 0.282 | 0.514 |
| TMEM45A  | 0 | -0.3531612 | 7.17E-16 | 1.31E-11   | 0.847 | 0.917 |
| MT-ATP6  | 0 | -0.3535826 | 1.03E-12 | 1.88E-08   | 0.562 | 0.699 |
| NUCB1    | 0 | -0.3578246 | 1.55E-27 | 2.83E-23   | 0.345 | 0.612 |
| SOX9     | 0 | -0.3591661 | 6.12E-17 | 1.12E-12   | 0.488 | 0.659 |
| PRDX4    | 0 | -0.3628861 | 2.42E-23 | 4.41E-19   | 0.443 | 0.671 |
| EID1     | 0 | -0.3648638 | 2.30E-32 | 4.19E-28   | 0.744 | 0.919 |
| ARRDC3   | 0 | -0.364906  | 1.15E-07 | 0.00210413 | 0.422 | 0.532 |
| VKORC1   | 0 | -0.3675923 | 4.05E-31 | 7.39E-27   | 0.847 | 0.942 |
| PSAP     | 0 | -0.3685248 | 8.67E-31 | 1.58E-26   | 0.743 | 0.899 |
| FXVD6    | 0 | -0.3715788 | 1.32E-20 | 2.41E-16   | 0.497 | 0.702 |
| FBXO2    | 0 | -0.3726228 | 1.34E-26 | 2.45E-22   | 0.418 | 0.659 |
| MT1X     | 0 | -0.3749812 | 6.18E-09 | 0.00011268 | 0.996 | 1     |
| SPON2    | 0 | -0.3796866 | 1.62E-43 | 2.96E-39   | 0.036 | 0.312 |
| IER2     | 0 | -0.3819612 | 1.16E-12 | 2.11E-08   | 0.184 | 0.343 |
| CLEC3A   | 0 | -0.3828544 | 5.32E-24 | 9.72E-20   | 0.066 | 0.264 |
| COL2A1   | 0 | -0.3835107 | 1.60E-21 | 2.91E-17   | 0.194 | 0.415 |
| CD99     | 0 | -0.3870086 | 2.53E-30 | 4.61E-26   | 0.711 | 0.883 |
| TSC22D1  | 0 | -0.3879285 | 2.10E-14 | 3.83E-10   | 0.398 | 0.579 |



|          |   |            |          |          |       |       |
|----------|---|------------|----------|----------|-------|-------|
| ITM2B    | 0 | -0.3892783 | 1.09E-31 | 1.99E-27 | 0.952 | 0.982 |
| SLC39A8  | 0 | -0.3930242 | 2.19E-29 | 4.00E-25 | 0.249 | 0.525 |
| MGP      | 0 | -0.3947381 | 9.92E-13 | 1.81E-08 | 0.997 | 0.998 |
| TGFBI    | 0 | -0.3948773 | 4.88E-16 | 8.90E-12 | 0.513 | 0.677 |
| NDUFA4L2 | 0 | -0.396054  | 3.18E-66 | 5.81E-62 | 1     | 1     |
| EGLN3    | 0 | -0.4057408 | 1.55E-21 | 2.83E-17 | 0.284 | 0.525 |
| ATRAID   | 0 | -0.4084843 | 2.91E-34 | 5.31E-30 | 0.601 | 0.843 |
| LUM      | 0 | -0.4121172 | 2.62E-28 | 4.78E-24 | 1     | 1     |
| MFGE8    | 0 | -0.4177442 | 1.21E-23 | 2.21E-19 | 0.699 | 0.829 |
| EGR1     | 0 | -0.4189965 | 1.58E-28 | 2.88E-24 | 0.139 | 0.403 |
| GPX3     | 0 | -0.4193587 | 8.33E-26 | 1.52E-21 | 0.769 | 0.912 |
| IFITM3   | 0 | -0.4334142 | 5.75E-33 | 1.05E-28 | 0.808 | 0.931 |
| FAM46A   | 0 | -0.442953  | 5.87E-27 | 1.07E-22 | 0.326 | 0.585 |
| HIF1A    | 0 | -0.4442862 | 2.55E-33 | 4.65E-29 | 0.639 | 0.868 |
| NGFRAP1  | 0 | -0.4466207 | 3.25E-34 | 5.94E-30 | 0.492 | 0.764 |
| GLRX     | 0 | -0.4478171 | 7.88E-18 | 1.44E-13 | 0.219 | 0.422 |
| PAM      | 0 | -0.4481937 | 1.51E-37 | 2.75E-33 | 0.279 | 0.603 |
| BAMBI    | 0 | -0.4523121 | 1.11E-17 | 2.02E-13 | 0.375 | 0.576 |
| IFITM2   | 0 | -0.453165  | 1.43E-28 | 2.61E-24 | 0.775 | 0.89  |
| DUSP1    | 0 | -0.4536711 | 7.98E-20 | 1.46E-15 | 0.267 | 0.484 |
| CFD      | 0 | -0.4547764 | 1.74E-32 | 3.18E-28 | 0.062 | 0.307 |
| C10orf10 | 0 | -0.4590114 | 7.50E-20 | 1.37E-15 | 0.444 | 0.65  |
| SERPING1 | 0 | -0.4643116 | 1.72E-37 | 3.13E-33 | 0.418 | 0.711 |
| IGFBP7   | 0 | -0.4682824 | 3.22E-32 | 5.87E-28 | 0.599 | 0.841 |
| COL9A3   | 0 | -0.4692735 | 3.03E-29 | 5.52E-25 | 0.22  | 0.504 |
| NOVA1    | 0 | -0.4738627 | 3.83E-11 | 6.98E-07 | 0.794 | 0.847 |
| ADM      | 0 | -0.4880969 | 1.64E-19 | 3.00E-15 | 0.757 | 0.854 |
| CA9      | 0 | -0.489323  | 5.61E-33 | 1.02E-28 | 0.268 | 0.563 |
| MALAT1   | 0 | -0.4920693 | 2.26E-53 | 4.13E-49 | 1     | 1     |
| ID1      | 0 | -0.4952113 | 7.85E-13 | 1.43E-08 | 0.231 | 0.395 |
| C1S      | 0 | -0.4984667 | 2.99E-39 | 5.46E-35 | 0.408 | 0.72  |
| CCDC85B  | 0 | -0.4985777 | 2.56E-25 | 4.67E-21 | 0.899 | 0.949 |
| COL11A1  | 0 | -0.5000618 | 1.00E-36 | 1.83E-32 | 0.279 | 0.596 |
| HTRA1    | 0 | -0.5129422 | 5.29E-38 | 9.65E-34 | 0.418 | 0.729 |
| SOD3     | 0 | -0.5222278 | 1.58E-26 | 2.88E-22 | 0.867 | 0.933 |
| PCOLCE2  | 0 | -0.5241619 | 3.51E-51 | 6.41E-47 | 0.72  | 0.94  |
| ID3      | 0 | -0.5276835 | 5.86E-17 | 1.07E-12 | 0.143 | 0.323 |
| MT-CO2   | 0 | -0.5334273 | 4.02E-22 | 7.33E-18 | 0.85  | 0.917 |
| WWP2     | 0 | -0.5365451 | 8.07E-36 | 1.47E-31 | 0.427 | 0.713 |

| PHLDA1  | 0       | -0.5478882 | 9.81E-13  | 1.79E-08   | 0.301 | 0.469 |
|---------|---------|------------|-----------|------------|-------|-------|
| LCN2    | 0       | -0.5543773 | 3.24E-21  | 5.92E-17   | 0.261 | 0.48  |
| GAPDH   | 0       | -0.5583981 | 2.24E-48  | 4.09E-44   | 1     | 1     |
| FOS     | 0       | -0.5640224 | 2.26E-30  | 4.12E-26   | 0.297 | 0.569 |
| S100B   | 0       | -0.564042  | 4.43E-30  | 8.08E-26   | 0.436 | 0.673 |
| FMOD    | 0       | -0.5710339 | 7.11E-56  | 1.30E-51   | 0.627 | 0.912 |
| FGFBP2  | 0       | -0.5769326 | 2.55E-30  | 4.66E-26   | 0.891 | 0.966 |
| CP      | 0       | -0.6038779 | 1.01E-28  | 1.84E-24   | 0.357 | 0.599 |
| RBP4    | 0       | -0.6149579 | 6.31E-38  | 1.15E-33   | 0.312 | 0.617 |
| OGN     | 0       | -0.6286272 | 2.06E-44  | 3.75E-40   | 0.537 | 0.857 |
| IGFBP5  | 0       | -0.6368556 | 1.54E-30  | 2.81E-26   | 0.154 | 0.428 |
| CST3    | 0       | -0.6520033 | 2.54E-73  | 4.64E-69   | 0.954 | 0.995 |
| PLAC9   | 0       | -0.6651449 | 4.03E-38  | 7.36E-34   | 0.34  | 0.653 |
| G0S2    | 0       | -0.6737991 | 3.27E-07  | 0.00597518 | 0.265 | 0.395 |
| MT1F    | 0       | -0.6931354 | 1.68E-33  | 3.06E-29   | 0.773 | 0.91  |
| MT1G    | 0       | -0.6971816 | 3.11E-21  | 5.68E-17   | 0.936 | 0.958 |
| ACAN    | 0       | -0.7135483 | 7.63E-52  | 1.39E-47   | 0.71  | 0.924 |
| LECT1   | 0       | -0.7309481 | 7.58E-66  | 1.38E-61   | 0.334 | 0.783 |
| CLU     | 0       | -0.7597861 | 7.48E-61  | 1.36E-56   | 0.996 | 1     |
| JUNB    | 0       | -0.7682042 | 3.31E-32  | 6.05E-28   | 0.334 | 0.616 |
| DCN     | 0       | -0.80842   | 3.53E-109 | 6.44E-105  | 0.999 | 1     |
| C2orf40 | 0       | -0.8092448 | 1.49E-62  | 2.71E-58   | 0.93  | 0.993 |
| PRELP   | 0       | -0.9267468 | 2.63E-85  | 4.80E-81   | 0.771 | 0.98  |
| CCDC80  | 0       | -0.9669301 | 1.16E-85  | 2.11E-81   | 0.706 | 0.964 |
| CHI3L2  | 0       | -0.9767206 | 7.96E-68  | 1.45E-63   | 0.554 | 0.912 |
| CHI3L1  | 0       | -1.1404299 | 3.64E-70  | 6.65E-66   | 0.886 | 0.975 |
| PLA2G2A | 0       | -1.1549015 | 2.08E-82  | 3.80E-78   | 0.198 | 0.7   |
| SLPI    | 0       | -1.2244489 | 2.89E-75  | 5.27E-71   | 0.735 | 0.957 |
| CTSD    | 0       | -1.3158617 | 4.78E-97  | 8.72E-93   | 0.721 | 0.969 |
| gene    | cluster | avg_logFC  | p_val     | p_val_adj  | pct.1 | pct.2 |
| PRG4    | 1       | 1.01243342 | 3.16E-11  | 5.76E-07   | 0.651 | 0.479 |
| HMGA1   | 1       | 0.90349513 | 4.67E-49  | 8.53E-45   | 0.725 | 0.299 |
| MT2A    | 1       | 0.90163191 | 2.72E-37  | 4.96E-33   | 1     | 1     |
| UPP1    | 1       | 0.86651142 | 1.45E-49  | 2.65E-45   | 0.804 | 0.42  |
| SPP1    | 1       | 0.85278565 | 1.38E-15  | 2.52E-11   | 0.891 | 0.717 |
| TM4SF1  | 1       | 0.84445325 | 7.19E-41  | 1.31E-36   | 0.748 | 0.347 |
| TIMP3   | 1       | 0.78009287 | 2.43E-26  | 4.43E-22   | 0.766 | 0.498 |
| CD55    | 1       | 0.75206725 | 7.74E-48  | 1.41E-43   | 0.926 | 0.648 |
| NRP2    | 1       | 0.74867343 | 6.90E-35  | 1.26E-30   | 0.597 | 0.247 |

|              |   |            |          |            |       |       |
|--------------|---|------------|----------|------------|-------|-------|
| CTSL         | 1 | 0.73419897 | 6.04E-27 | 1.10E-22   | 0.795 | 0.507 |
| RGCC         | 1 | 0.67608743 | 9.59E-33 | 1.75E-28   | 0.95  | 0.781 |
| SMOX         | 1 | 0.642074   | 1.45E-26 | 2.65E-22   | 0.601 | 0.299 |
| C11orf96     | 1 | 0.63014832 | 5.55E-24 | 1.01E-19   | 0.533 | 0.235 |
| SOD2         | 1 | 0.56237724 | 2.68E-27 | 4.90E-23   | 1     | 0.982 |
| IGFBP3       | 1 | 0.54409884 | 2.21E-12 | 4.04E-08   | 0.605 | 0.379 |
| TMSB10       | 1 | 0.4877596  | 6.16E-26 | 1.12E-21   | 0.992 | 0.989 |
| EPB41L4A-AS1 | 1 | 0.47396886 | 7.09E-35 | 1.29E-30   | 0.932 | 0.742 |
| GSTO1        | 1 | 0.47370446 | 6.68E-31 | 1.22E-26   | 0.857 | 0.607 |
| EIF1         | 1 | 0.46951081 | 1.01E-50 | 1.83E-46   | 1     | 1     |
| MSMP         | 1 | 0.44287471 | 1.14E-06 | 0.02083911 | 0.244 | 0.123 |
| TGM2         | 1 | 0.42430131 | 5.38E-25 | 9.81E-21   | 0.494 | 0.196 |
| ZFAS1        | 1 | 0.41799223 | 3.06E-37 | 5.58E-33   | 1     | 0.982 |
| SNHG12       | 1 | 0.41465075 | 2.66E-20 | 4.86E-16   | 0.626 | 0.388 |
| ANXA1        | 1 | 0.41318715 | 1.82E-12 | 3.33E-08   | 0.822 | 0.717 |
| GYPC         | 1 | 0.41118004 | 1.10E-17 | 2.01E-13   | 0.535 | 0.306 |
| STK17A       | 1 | 0.40353612 | 4.40E-18 | 8.02E-14   | 0.647 | 0.402 |
| CCND1        | 1 | 0.39572793 | 1.01E-15 | 1.85E-11   | 0.477 | 0.249 |
| BZW1         | 1 | 0.38240136 | 3.51E-16 | 6.40E-12   | 0.857 | 0.655 |
| ABI3BP       | 1 | 0.38119569 | 3.57E-08 | 0.00065199 | 0.659 | 0.553 |
| FAP          | 1 | 0.36775408 | 1.90E-15 | 3.47E-11   | 0.459 | 0.24  |
| VMP1         | 1 | 0.33850275 | 2.08E-09 | 3.79E-05   | 0.651 | 0.523 |
| RGS16        | 1 | 0.33795183 | 1.42E-11 | 2.59E-07   | 0.382 | 0.187 |
| SYF2         | 1 | 0.33547334 | 3.64E-20 | 6.64E-16   | 0.913 | 0.795 |
| LGALS1       | 1 | 0.3271778  | 2.61E-09 | 4.77E-05   | 0.986 | 0.957 |
| AIMP1        | 1 | 0.32577682 | 1.20E-14 | 2.19E-10   | 0.698 | 0.5   |
| TPM1         | 1 | 0.32272775 | 6.47E-10 | 1.18E-05   | 0.539 | 0.381 |
| MIF          | 1 | 0.31466901 | 4.28E-27 | 7.81E-23   | 1     | 1     |
| SERPINE1     | 1 | 0.31080905 | 5.41E-11 | 9.88E-07   | 0.341 | 0.162 |
| BHLHE40      | 1 | 0.30581355 | 5.09E-11 | 9.29E-07   | 0.754 | 0.582 |
| NT5E         | 1 | 0.30135489 | 2.83E-11 | 5.17E-07   | 0.424 | 0.24  |
| PMP22        | 1 | 0.29839011 | 2.98E-18 | 5.43E-14   | 0.934 | 0.772 |
| RHOC         | 1 | 0.29782971 | 7.94E-11 | 1.45E-06   | 0.872 | 0.753 |
| RNF114       | 1 | 0.29733707 | 1.24E-13 | 2.25E-09   | 0.734 | 0.541 |
| SGIP1        | 1 | 0.29387675 | 1.57E-08 | 0.00028624 | 0.359 | 0.205 |
| DNER         | 1 | 0.29294177 | 2.08E-11 | 3.79E-07   | 0.694 | 0.527 |
| AC090498.1   | 1 | 0.29283715 | 1.26E-37 | 2.31E-33   | 1     | 1     |
| NBEAL1       | 1 | 0.2886867  | 1.99E-21 | 3.63E-17   | 0.998 | 0.977 |
| NBPF14       | 1 | 0.28735427 | 6.22E-12 | 1.13E-07   | 0.471 | 0.272 |

|            |   |            |          |            |       |       |
|------------|---|------------|----------|------------|-------|-------|
| ISG20      | 1 | 0.28587751 | 2.30E-10 | 4.20E-06   | 0.657 | 0.507 |
| PRDX6      | 1 | 0.28284715 | 4.22E-15 | 7.70E-11   | 0.911 | 0.756 |
| KLF3       | 1 | 0.27407642 | 2.50E-08 | 0.00045549 | 0.444 | 0.292 |
| S100A10    | 1 | 0.27313106 | 1.88E-09 | 3.43E-05   | 0.996 | 0.984 |
| RPL36      | 1 | 0.27282491 | 6.12E-39 | 1.12E-34   | 1     | 1     |
| S100A16    | 1 | 0.26484041 | 1.00E-07 | 0.00183108 | 0.405 | 0.263 |
| RELB       | 1 | 0.26239992 | 6.08E-10 | 1.11E-05   | 0.448 | 0.276 |
| HMGA2      | 1 | 0.26152002 | 2.10E-13 | 3.83E-09   | 0.331 | 0.135 |
| CSGALNACT2 | 1 | 0.26018986 | 2.98E-08 | 0.00054417 | 0.417 | 0.269 |
| AKAP12     | 1 | 0.25926431 | 1.53E-13 | 2.79E-09   | 0.225 | 0.057 |
| DAB2       | 1 | 0.25654013 | 2.36E-08 | 0.00043022 | 0.422 | 0.274 |
| RAN        | 1 | 0.25642979 | 2.26E-11 | 4.13E-07   | 0.824 | 0.678 |
| FXVD5      | 1 | 0.25535158 | 4.48E-13 | 8.17E-09   | 0.942 | 0.852 |
| LINC00493  | 1 | 0.2544324  | 5.54E-14 | 1.01E-09   | 0.93  | 0.815 |
| KRT18      | 1 | 0.25384735 | 7.05E-12 | 1.29E-07   | 0.345 | 0.158 |
| PIM3       | 1 | -0.2502261 | 5.08E-11 | 9.27E-07   | 0.304 | 0.498 |
| RPN2       | 1 | -0.2503091 | 9.95E-15 | 1.82E-10   | 0.083 | 0.267 |
| IFITM2     | 1 | -0.2503167 | 1.17E-07 | 0.00213307 | 0.816 | 0.858 |
| HNRNPA1    | 1 | -0.2511896 | 3.47E-13 | 6.34E-09   | 0.973 | 0.986 |
| MYL6B      | 1 | -0.2512263 | 2.10E-10 | 3.83E-06   | 0.589 | 0.717 |
| MYEOV2     | 1 | -0.2513269 | 5.73E-10 | 1.05E-05   | 0.517 | 0.683 |
| SUMO2      | 1 | -0.2517413 | 4.14E-17 | 7.56E-13   | 0.965 | 0.986 |
| ROMO1      | 1 | -0.2521707 | 4.96E-13 | 9.05E-09   | 0.773 | 0.893 |
| COL6A2     | 1 | -0.252237  | 6.54E-08 | 0.00119329 | 0.498 | 0.632 |
| CUTA       | 1 | -0.2533044 | 9.34E-13 | 1.70E-08   | 0.721 | 0.829 |
| COL5A2     | 1 | -0.2534561 | 1.89E-11 | 3.45E-07   | 0.18  | 0.372 |
| TMEM219    | 1 | -0.2536525 | 3.68E-10 | 6.72E-06   | 0.508 | 0.662 |
| HMG3       | 1 | -0.2554957 | 6.83E-15 | 1.25E-10   | 0.136 | 0.349 |
| IFI6       | 1 | -0.2555641 | 6.66E-13 | 1.21E-08   | 0.242 | 0.452 |
| NOL3       | 1 | -0.2557831 | 2.43E-09 | 4.44E-05   | 0.36  | 0.53  |
| VAMP2      | 1 | -0.2596295 | 1.45E-11 | 2.64E-07   | 0.711 | 0.813 |
| C1orf21    | 1 | -0.2604036 | 5.65E-11 | 1.03E-06   | 0.39  | 0.582 |
| ZFR        | 1 | -0.2609336 | 1.11E-11 | 2.03E-07   | 0.184 | 0.365 |
| STK26      | 1 | -0.2627801 | 2.45E-10 | 4.47E-06   | 0.324 | 0.505 |
| PDIA4      | 1 | -0.2633674 | 3.06E-15 | 5.58E-11   | 0.184 | 0.406 |
| H3F3B      | 1 | -0.2634249 | 5.92E-15 | 1.08E-10   | 1     | 1     |
| FKBP9      | 1 | -0.263649  | 1.61E-17 | 2.93E-13   | 0.112 | 0.34  |
| IFITM3     | 1 | -0.2658528 | 3.10E-10 | 5.66E-06   | 0.829 | 0.87  |
| EEF2       | 1 | -0.26639   | 2.22E-13 | 4.06E-09   | 0.973 | 0.975 |

|               |   |            |          |            |       |       |
|---------------|---|------------|----------|------------|-------|-------|
| RP5-1097P24.1 | 1 | -0.2671737 | 6.91E-12 | 1.26E-07   | 0.109 | 0.276 |
| CMPK1         | 1 | -0.2676716 | 2.65E-11 | 4.84E-07   | 0.607 | 0.76  |
| GPX3          | 1 | -0.2680835 | 3.61E-13 | 6.58E-09   | 0.857 | 0.959 |
| CALM2         | 1 | -0.2686565 | 2.34E-15 | 4.27E-11   | 0.932 | 0.986 |
| MT-ND5        | 1 | -0.2694756 | 1.06E-09 | 1.93E-05   | 0.397 | 0.587 |
| PSAP          | 1 | -0.2695778 | 7.91E-11 | 1.44E-06   | 0.853 | 0.936 |
| DUT           | 1 | -0.2696992 | 1.06E-11 | 1.94E-07   | 0.471 | 0.648 |
| H1F0          | 1 | -0.2698288 | 5.36E-12 | 9.78E-08   | 0.209 | 0.416 |
| SARAF         | 1 | -0.2699735 | 1.52E-12 | 2.77E-08   | 0.51  | 0.692 |
| WFDC2         | 1 | -0.2701825 | 4.90E-22 | 8.94E-18   | 0.033 | 0.242 |
| BSG           | 1 | -0.2710012 | 4.67E-10 | 8.52E-06   | 0.547 | 0.701 |
| N4BP2L2       | 1 | -0.2716541 | 1.61E-12 | 2.94E-08   | 0.616 | 0.795 |
| FKBP10        | 1 | -0.2718472 | 1.32E-11 | 2.41E-07   | 0.37  | 0.562 |
| NUCB1         | 1 | -0.2749493 | 4.90E-12 | 8.94E-08   | 0.496 | 0.68  |
| ATPIF1        | 1 | -0.2758406 | 3.15E-11 | 5.75E-07   | 0.564 | 0.724 |
| PCOLCE        | 1 | -0.2759802 | 5.73E-12 | 1.05E-07   | 0.14  | 0.317 |
| CLU           | 1 | -0.2759968 | 6.72E-07 | 0.01226316 | 1     | 1     |
| PPIC          | 1 | -0.2767204 | 9.37E-14 | 1.71E-09   | 0.223 | 0.45  |
| BRK1          | 1 | -0.2770195 | 3.35E-14 | 6.11E-10   | 0.678 | 0.852 |
| PLXDC2        | 1 | -0.2782285 | 5.00E-14 | 9.12E-10   | 0.331 | 0.555 |
| MAGED1        | 1 | -0.2808712 | 9.66E-17 | 1.76E-12   | 0.056 | 0.242 |
| CTSA          | 1 | -0.2812697 | 3.52E-21 | 6.43E-17   | 0.066 | 0.295 |
| SRP9          | 1 | -0.2813842 | 1.92E-15 | 3.50E-11   | 0.632 | 0.811 |
| MIA           | 1 | -0.2829209 | 1.24E-16 | 2.27E-12   | 0.988 | 0.998 |
| TOB1          | 1 | -0.2836891 | 5.45E-16 | 9.94E-12   | 0.186 | 0.422 |
| BTG1          | 1 | -0.284334  | 1.68E-10 | 3.07E-06   | 0.965 | 0.986 |
| NME4          | 1 | -0.2846164 | 1.36E-13 | 2.48E-09   | 0.242 | 0.452 |
| OS9           | 1 | -0.2851735 | 2.24E-11 | 4.08E-07   | 0.347 | 0.525 |
| PRKAR1A       | 1 | -0.2854726 | 1.23E-09 | 2.25E-05   | 0.568 | 0.71  |
| HSPB6         | 1 | -0.2855484 | 6.30E-20 | 1.15E-15   | 0.085 | 0.317 |
| CDK5RAP2      | 1 | -0.2858289 | 1.76E-08 | 0.0003208  | 0.124 | 0.263 |
| SGCB          | 1 | -0.2862348 | 3.64E-15 | 6.64E-11   | 0.316 | 0.562 |
| SUMO1         | 1 | -0.2866472 | 8.93E-15 | 1.63E-10   | 0.531 | 0.735 |
| IFITM1        | 1 | -0.2876736 | 2.24E-09 | 4.09E-05   | 0.324 | 0.5   |
| TMED10        | 1 | -0.2878057 | 1.46E-14 | 2.67E-10   | 0.82  | 0.9   |
| MORF4L2       | 1 | -0.2888536 | 9.35E-13 | 1.71E-08   | 0.444 | 0.637 |
| MT1X          | 1 | -0.2894924 | 7.45E-09 | 0.00013599 | 0.996 | 1     |
| IGFBP7        | 1 | -0.2897636 | 5.85E-10 | 1.07E-05   | 0.82  | 0.911 |
| PNKD          | 1 | -0.291118  | 1.38E-20 | 2.51E-16   | 0.14  | 0.395 |

|          |   |            |          |            |       |       |
|----------|---|------------|----------|------------|-------|-------|
| HMGN2    | 1 | -0.2932952 | 3.35E-16 | 6.11E-12   | 0.828 | 0.893 |
| SLC16A3  | 1 | -0.2952618 | 3.23E-10 | 5.89E-06   | 0.329 | 0.509 |
| H3F3A    | 1 | -0.2964453 | 1.26E-14 | 2.29E-10   | 0.882 | 0.934 |
| NEAT1    | 1 | -0.2969495 | 4.23E-13 | 7.71E-09   | 0.986 | 0.986 |
| ITM2A    | 1 | -0.2977798 | 2.90E-08 | 0.00052869 | 0.465 | 0.621 |
| AEBP1    | 1 | -0.2998435 | 1.59E-10 | 2.90E-06   | 0.628 | 0.767 |
| SNRPN    | 1 | -0.3009782 | 3.04E-15 | 5.55E-11   | 0.614 | 0.788 |
| RNASET2  | 1 | -0.301089  | 6.21E-21 | 1.13E-16   | 0.207 | 0.486 |
| B2M      | 1 | -0.3023766 | 2.61E-19 | 4.77E-15   | 0.977 | 0.993 |
| CEBPD    | 1 | -0.3037404 | 4.04E-07 | 0.00737928 | 0.638 | 0.712 |
| FGFRL1   | 1 | -0.3037887 | 1.41E-16 | 2.57E-12   | 0.163 | 0.393 |
| SERPING1 | 1 | -0.3045689 | 1.47E-08 | 0.00026798 | 0.519 | 0.628 |
| PABPC1   | 1 | -0.3059602 | 6.55E-16 | 1.20E-11   | 0.694 | 0.854 |
| TCF4     | 1 | -0.3061024 | 1.07E-19 | 1.96E-15   | 0.12  | 0.368 |
| HSP90B1  | 1 | -0.3089463 | 4.74E-16 | 8.65E-12   | 0.725 | 0.884 |
| AP3S1    | 1 | -0.3089617 | 6.95E-12 | 1.27E-07   | 0.661 | 0.806 |
| PCSK1N   | 1 | -0.3106219 | 6.29E-08 | 0.00114715 | 0.221 | 0.365 |
| EEF1A1   | 1 | -0.3133508 | 1.59E-34 | 2.89E-30   | 1     | 1     |
| CYR61    | 1 | -0.3160974 | 4.16E-11 | 7.59E-07   | 0.141 | 0.311 |
| OMD      | 1 | -0.3163039 | 8.66E-15 | 1.58E-10   | 0.087 | 0.274 |
| CANX     | 1 | -0.3180385 | 4.51E-18 | 8.22E-14   | 0.583 | 0.799 |
| NAA38    | 1 | -0.3209497 | 1.99E-16 | 3.64E-12   | 0.531 | 0.749 |
| TMEM230  | 1 | -0.3232514 | 3.78E-16 | 6.90E-12   | 0.527 | 0.715 |
| LAGE3    | 1 | -0.3233549 | 4.28E-18 | 7.81E-14   | 0.366 | 0.626 |
| UGP2     | 1 | -0.3242305 | 1.76E-14 | 3.20E-10   | 0.448 | 0.648 |
| DNM3OS   | 1 | -0.3244886 | 4.19E-15 | 7.64E-11   | 0.095 | 0.285 |
| RCN2     | 1 | -0.3245784 | 8.29E-13 | 1.51E-08   | 0.486 | 0.669 |
| SDC2     | 1 | -0.3253113 | 3.21E-15 | 5.86E-11   | 0.703 | 0.863 |
| P4HA1    | 1 | -0.3261272 | 2.50E-16 | 4.57E-12   | 0.562 | 0.758 |
| SLC39A8  | 1 | -0.3267634 | 8.30E-18 | 1.51E-13   | 0.25  | 0.514 |
| SUMF2    | 1 | -0.3273409 | 3.33E-17 | 6.07E-13   | 0.324 | 0.562 |
| PPP3CA   | 1 | -0.3311043 | 6.66E-11 | 1.21E-06   | 0.864 | 0.929 |
| CDO1     | 1 | -0.3324818 | 2.03E-15 | 3.70E-11   | 0.12  | 0.324 |
| PEBP1    | 1 | -0.334822  | 4.47E-17 | 8.16E-13   | 0.638 | 0.808 |
| NDUFA4L2 | 1 | -0.3372088 | 2.36E-40 | 4.31E-36   | 1     | 1     |
| CHID1    | 1 | -0.3401035 | 1.56E-20 | 2.85E-16   | 0.374 | 0.653 |
| AK1      | 1 | -0.3408888 | 3.87E-19 | 7.06E-15   | 0.736 | 0.906 |
| TTC3     | 1 | -0.3414086 | 1.03E-17 | 1.88E-13   | 0.415 | 0.671 |
| RNF130   | 1 | -0.3415982 | 2.18E-17 | 3.97E-13   | 0.382 | 0.619 |

|         |   |            |          |            |       |       |
|---------|---|------------|----------|------------|-------|-------|
| PKM     | 1 | -0.343078  | 1.97E-12 | 3.60E-08   | 0.874 | 0.925 |
| MALAT1  | 1 | -0.3431912 | 5.51E-24 | 1.01E-19   | 1     | 1     |
| BHLHE41 | 1 | -0.3441655 | 1.34E-18 | 2.45E-14   | 0.178 | 0.429 |
| TRPS1   | 1 | -0.3469879 | 1.27E-20 | 2.32E-16   | 0.172 | 0.438 |
| CTSF    | 1 | -0.348894  | 1.09E-21 | 2.00E-17   | 0.172 | 0.441 |
| PPP1R3C | 1 | -0.3490105 | 2.45E-14 | 4.47E-10   | 0.269 | 0.489 |
| TM2D1   | 1 | -0.3499901 | 6.18E-18 | 1.13E-13   | 0.432 | 0.664 |
| SLC26A2 | 1 | -0.3516295 | 1.47E-19 | 2.69E-15   | 0.062 | 0.272 |
| LUM     | 1 | -0.3525187 | 8.78E-10 | 1.60E-05   | 1     | 1     |
| PRDX1   | 1 | -0.353205  | 2.12E-17 | 3.86E-13   | 0.733 | 0.847 |
| MT1E    | 1 | -0.3535783 | 5.71E-13 | 1.04E-08   | 0.934 | 0.966 |
| FKBP2   | 1 | -0.3536685 | 5.34E-21 | 9.75E-17   | 0.483 | 0.765 |
| FTL     | 1 | -0.3542422 | 1.56E-37 | 2.84E-33   | 1     | 1     |
| PRDX4   | 1 | -0.3545486 | 3.67E-18 | 6.70E-14   | 0.709 | 0.87  |
| SNAI2   | 1 | -0.3555209 | 4.76E-13 | 8.68E-09   | 0.207 | 0.409 |
| ITM2B   | 1 | -0.3568961 | 3.48E-17 | 6.34E-13   | 0.971 | 0.991 |
| PCOLCE2 | 1 | -0.3587698 | 3.80E-23 | 6.93E-19   | 0.907 | 0.977 |
| DYNLL1  | 1 | -0.3606226 | 2.46E-17 | 4.49E-13   | 0.752 | 0.877 |
| INHBA   | 1 | -0.3614335 | 1.25E-15 | 2.28E-11   | 0.126 | 0.336 |
| LSP1    | 1 | -0.3615881 | 2.46E-20 | 4.49E-16   | 0.141 | 0.39  |
| GAS6    | 1 | -0.3629015 | 4.96E-27 | 9.05E-23   | 0.134 | 0.441 |
| IER2    | 1 | -0.3651374 | 4.68E-15 | 8.54E-11   | 0.14  | 0.349 |
| SMOC2   | 1 | -0.3658495 | 2.90E-24 | 5.28E-20   | 0.066 | 0.32  |
| ID2     | 1 | -0.3695119 | 2.98E-11 | 5.44E-07   | 0.24  | 0.42  |
| ISLR    | 1 | -0.3719431 | 8.23E-25 | 1.50E-20   | 0.13  | 0.416 |
| CAPS    | 1 | -0.3743494 | 7.43E-11 | 1.36E-06   | 0.618 | 0.733 |
| SAT1    | 1 | -0.3778584 | 2.23E-17 | 4.06E-13   | 0.965 | 0.991 |
| HIF1A   | 1 | -0.3792654 | 3.80E-21 | 6.94E-17   | 0.808 | 0.945 |
| SDF4    | 1 | -0.3817543 | 2.25E-21 | 4.11E-17   | 0.463 | 0.719 |
| GSN     | 1 | -0.3835165 | 1.33E-16 | 2.43E-12   | 0.364 | 0.596 |
| LCN2    | 1 | -0.3835969 | 1.20E-07 | 0.00219419 | 0.49  | 0.626 |
| SERF2   | 1 | -0.3858703 | 6.74E-36 | 1.23E-31   | 1     | 1     |
| GRN     | 1 | -0.3873744 | 7.67E-23 | 1.40E-18   | 0.105 | 0.363 |
| SOX9    | 1 | -0.3897396 | 1.91E-14 | 3.49E-10   | 0.566 | 0.756 |
| MT-CO3  | 1 | -0.3908667 | 2.04E-13 | 3.73E-09   | 0.781 | 0.84  |
| EGLN3   | 1 | -0.3935631 | 1.39E-12 | 2.54E-08   | 0.281 | 0.482 |
| MT-ND4  | 1 | -0.3958562 | 2.17E-19 | 3.97E-15   | 0.915 | 0.963 |
| CD59    | 1 | -0.3962369 | 4.94E-25 | 9.01E-21   | 0.905 | 0.968 |
| PLD3    | 1 | -0.397293  | 3.86E-21 | 7.05E-17   | 0.36  | 0.632 |

|         |   |            |          |            |       |       |
|---------|---|------------|----------|------------|-------|-------|
| FGFBP2  | 1 | -0.3978831 | 3.12E-13 | 5.70E-09   | 0.988 | 1     |
| TSPAN3  | 1 | -0.3986957 | 6.62E-20 | 1.21E-15   | 0.318 | 0.566 |
| CALR    | 1 | -0.4006963 | 1.58E-16 | 2.88E-12   | 0.502 | 0.721 |
| SPON2   | 1 | -0.4018261 | 2.23E-24 | 4.07E-20   | 0.083 | 0.345 |
| ID4     | 1 | -0.4042367 | 8.20E-17 | 1.50E-12   | 0.221 | 0.459 |
| FCGRT   | 1 | -0.405476  | 3.70E-22 | 6.75E-18   | 0.434 | 0.678 |
| ANGPTL2 | 1 | -0.4064283 | 6.37E-21 | 1.16E-16   | 0.277 | 0.55  |
| CRIP1   | 1 | -0.4083239 | 6.34E-26 | 1.16E-21   | 0.221 | 0.546 |
| P4HB    | 1 | -0.4090103 | 5.65E-21 | 1.03E-16   | 0.62  | 0.813 |
| RHOBTB3 | 1 | -0.4115224 | 1.16E-22 | 2.12E-18   | 0.264 | 0.553 |
| CA9     | 1 | -0.4117492 | 1.80E-10 | 3.28E-06   | 0.428 | 0.58  |
| TMED2   | 1 | -0.4143042 | 3.64E-23 | 6.65E-19   | 0.576 | 0.813 |
| GAPDH   | 1 | -0.4158157 | 3.77E-10 | 6.87E-06   | 1     | 1     |
| FXYP1   | 1 | -0.4208413 | 4.81E-22 | 8.78E-18   | 0.293 | 0.564 |
| MT-ND3  | 1 | -0.4227111 | 1.66E-18 | 3.02E-14   | 0.331 | 0.587 |
| POLR2L  | 1 | -0.4291621 | 2.80E-25 | 5.10E-21   | 0.758 | 0.884 |
| EID1    | 1 | -0.4292744 | 4.52E-33 | 8.25E-29   | 0.767 | 0.92  |
| DDR2    | 1 | -0.4321518 | 2.32E-25 | 4.24E-21   | 0.262 | 0.559 |
| CD320   | 1 | -0.4372985 | 9.59E-30 | 1.75E-25   | 0.314 | 0.653 |
| EGR1    | 1 | -0.437438  | 1.60E-19 | 2.92E-15   | 0.182 | 0.438 |
| SRGN    | 1 | -0.4440567 | 1.98E-22 | 3.61E-18   | 0.207 | 0.484 |
| TPD52   | 1 | -0.4468798 | 1.92E-24 | 3.51E-20   | 0.601 | 0.817 |
| TGFBI   | 1 | -0.4513802 | 5.91E-09 | 0.00010784 | 0.556 | 0.699 |
| C1S     | 1 | -0.4538892 | 4.28E-23 | 7.81E-19   | 0.49  | 0.733 |
| SCRG1   | 1 | -0.4557968 | 8.27E-20 | 1.51E-15   | 0.994 | 1     |
| COL9A2  | 1 | -0.4567341 | 2.26E-22 | 4.12E-18   | 0.229 | 0.505 |
| PDPN    | 1 | -0.4572842 | 2.17E-15 | 3.95E-11   | 0.471 | 0.664 |
| LY6E    | 1 | -0.4575282 | 3.93E-29 | 7.17E-25   | 0.32  | 0.637 |
| DCN     | 1 | -0.4595617 | 5.51E-35 | 1.01E-30   | 1     | 1     |
| CNPY2   | 1 | -0.4604392 | 1.26E-27 | 2.30E-23   | 0.444 | 0.731 |
| MDFI    | 1 | -0.4652836 | 1.82E-23 | 3.32E-19   | 0.2   | 0.491 |
| DDIT4   | 1 | -0.4688271 | 1.34E-14 | 2.45E-10   | 0.32  | 0.534 |
| MT-CYB  | 1 | -0.4708893 | 3.27E-18 | 5.97E-14   | 0.372 | 0.619 |
| MT-CO1  | 1 | -0.478909  | 1.01E-19 | 1.84E-15   | 0.895 | 0.947 |
| MGP     | 1 | -0.4823187 | 6.17E-13 | 1.13E-08   | 0.994 | 0.998 |
| VCAN    | 1 | -0.4896295 | 1.37E-20 | 2.50E-16   | 0.231 | 0.489 |
| CST3    | 1 | -0.4937845 | 8.53E-42 | 1.56E-37   | 0.99  | 1     |
| LRPAP1  | 1 | -0.4943231 | 1.45E-27 | 2.65E-23   | 0.366 | 0.664 |
| HTTRA1  | 1 | -0.5006409 | 7.34E-32 | 1.34E-27   | 0.665 | 0.897 |



|         |   |            |          |          |       |       |
|---------|---|------------|----------|----------|-------|-------|
| PAX1    | 1 | -0.5036897 | 2.05E-23 | 3.74E-19 | 0.32  | 0.594 |
| IGF2    | 1 | -0.5145889 | 9.80E-16 | 1.79E-11 | 0.136 | 0.347 |
| COL11A2 | 1 | -0.5153307 | 2.93E-33 | 5.35E-29 | 0.36  | 0.712 |
| C7orf73 | 1 | -0.5191111 | 1.99E-27 | 3.63E-23 | 0.504 | 0.76  |
| PDIA3   | 1 | -0.519566  | 3.51E-31 | 6.40E-27 | 0.362 | 0.687 |
| PNRC1   | 1 | -0.5282422 | 5.90E-26 | 1.08E-21 | 0.868 | 0.934 |
| VKORC1  | 1 | -0.5327779 | 2.14E-46 | 3.90E-42 | 0.934 | 0.993 |
| FBXO2   | 1 | -0.534584  | 2.58E-40 | 4.71E-36 | 0.541 | 0.858 |
| FMOD    | 1 | -0.5349739 | 5.28E-40 | 9.64E-36 | 0.88  | 0.979 |
| PDIA6   | 1 | -0.5353691 | 3.31E-36 | 6.04E-32 | 0.38  | 0.726 |
| CHI3L2  | 1 | -0.5372534 | 1.19E-20 | 2.17E-16 | 0.628 | 0.865 |
| ATRAID  | 1 | -0.5377865 | 6.26E-44 | 1.14E-39 | 0.707 | 0.936 |
| MT-ATP6 | 1 | -0.5417496 | 3.36E-20 | 6.13E-16 | 0.558 | 0.756 |
| NGFRAP1 | 1 | -0.54749   | 2.74E-40 | 5.00E-36 | 0.694 | 0.909 |
| DUSP1   | 1 | -0.5537798 | 7.40E-21 | 1.35E-16 | 0.269 | 0.53  |
| MT-ND1  | 1 | -0.5549901 | 6.18E-29 | 1.13E-24 | 0.242 | 0.584 |
| OGN     | 1 | -0.5651329 | 1.36E-18 | 2.49E-14 | 0.841 | 0.938 |
| MT-ND2  | 1 | -0.5756701 | 7.00E-29 | 1.28E-24 | 0.266 | 0.603 |
| FOS     | 1 | -0.5879382 | 9.45E-27 | 1.72E-22 | 0.372 | 0.653 |
| S100A4  | 1 | -0.5974765 | 8.38E-20 | 1.53E-15 | 0.671 | 0.813 |
| MT1H    | 1 | -0.5984093 | 2.40E-10 | 4.37E-06 | 0.634 | 0.76  |
| CFD     | 1 | -0.6015319 | 2.97E-18 | 5.41E-14 | 0.095 | 0.308 |
| COL9A3  | 1 | -0.6040655 | 1.27E-22 | 2.31E-18 | 0.455 | 0.724 |
| WWP2    | 1 | -0.6050547 | 2.95E-35 | 5.38E-31 | 0.545 | 0.82  |
| FAM46A  | 1 | -0.6150434 | 3.44E-36 | 6.28E-32 | 0.391 | 0.735 |
| FXVD6   | 1 | -0.6152286 | 1.43E-43 | 2.62E-39 | 0.554 | 0.868 |
| ID1     | 1 | -0.615388  | 2.23E-21 | 4.07E-17 | 0.211 | 0.484 |
| PAM     | 1 | -0.6242629 | 9.22E-50 | 1.68E-45 | 0.403 | 0.806 |
| GOLIM4  | 1 | -0.6304335 | 1.17E-23 | 2.14E-19 | 0.215 | 0.495 |
| NOVA1   | 1 | -0.6305609 | 1.37E-21 | 2.51E-17 | 0.816 | 0.916 |
| CD99    | 1 | -0.6743575 | 1.49E-67 | 2.71E-63 | 0.839 | 0.989 |
| C2orf82 | 1 | -0.6786551 | 8.35E-14 | 1.52E-09 | 0.973 | 0.984 |
| CHI3L1  | 1 | -0.6869478 | 1.29E-16 | 2.36E-12 | 0.944 | 0.977 |
| JUNB    | 1 | -0.6883931 | 3.59E-27 | 6.54E-23 | 0.331 | 0.651 |
| MT-CO2  | 1 | -0.7257773 | 4.49E-35 | 8.19E-31 | 0.824 | 0.945 |
| BAMBI   | 1 | -0.727267  | 7.23E-37 | 1.32E-32 | 0.428 | 0.779 |
| IBSP    | 1 | -0.7322221 | 1.44E-14 | 2.63E-10 | 0.012 | 0.139 |
| ITM2C   | 1 | -0.7394345 | 1.15E-55 | 2.10E-51 | 0.234 | 0.694 |
| LECT1   | 1 | -0.7457296 | 9.93E-42 | 1.81E-37 | 0.736 | 0.95  |

| PRELP    | 1       | -0.7731635 | 2.25E-52 | 4.11E-48   | 0.948 | 0.995 |
|----------|---------|------------|----------|------------|-------|-------|
| COL11A1  | 1       | -0.782567  | 5.67E-50 | 1.03E-45   | 0.496 | 0.877 |
| S100B    | 1       | -0.7921066 | 2.08E-41 | 3.79E-37   | 0.634 | 0.847 |
| ID3      | 1       | -0.7948066 | 4.20E-24 | 7.66E-20   | 0.147 | 0.422 |
| RBP4     | 1       | -0.8130182 | 5.42E-43 | 9.90E-39   | 0.655 | 0.906 |
| IGFBP6   | 1       | -0.8284032 | 6.27E-36 | 1.14E-31   | 0.541 | 0.815 |
| CP       | 1       | -0.8294788 | 1.41E-40 | 2.58E-36   | 0.359 | 0.721 |
| CLEC3A   | 1       | -0.842016  | 8.94E-33 | 1.63E-28   | 0.233 | 0.587 |
| C2orf40  | 1       | -0.8611738 | 5.02E-44 | 9.16E-40   | 0.986 | 1     |
| MT1F     | 1       | -0.8722134 | 2.69E-38 | 4.91E-34   | 0.839 | 0.957 |
| COL2A1   | 1       | -0.8800457 | 3.38E-43 | 6.16E-39   | 0.326 | 0.717 |
| TSC22D1  | 1       | -0.8880453 | 3.84E-39 | 7.00E-35   | 0.45  | 0.779 |
| CYTL1    | 1       | -0.8949876 | 1.46E-23 | 2.67E-19   | 0.159 | 0.443 |
| PLA2G2A  | 1       | -0.9150473 | 4.49E-25 | 8.19E-21   | 0.388 | 0.708 |
| MT1G     | 1       | -0.9739522 | 2.17E-33 | 3.96E-29   | 0.93  | 0.977 |
| ACAN     | 1       | -0.9765802 | 6.43E-74 | 1.17E-69   | 0.847 | 0.991 |
| EPYC     | 1       | -0.9798985 | 2.00E-54 | 3.65E-50   | 0.093 | 0.539 |
| PLAC9    | 1       | -0.9943381 | 9.76E-60 | 1.78E-55   | 0.517 | 0.886 |
| CCDC80   | 1       | -1.0314464 | 5.73E-65 | 1.05E-60   | 0.876 | 0.995 |
| SLPI     | 1       | -1.4488676 | 1.38E-37 | 2.51E-33   | 0.891 | 0.993 |
| CTSD     | 1       | -1.5330578 | 3.31E-85 | 6.04E-81   | 0.767 | 0.989 |
| gene     | cluster | avg_logFC  | p_val    | p_val_adj  | pct.1 | pct.2 |
| HMGA1    | 2       | 0.99486752 | 9.36E-63 | 1.71E-58   | 0.831 | 0.353 |
| SPP1     | 2       | 0.94264852 | 4.56E-17 | 8.33E-13   | 0.862 | 0.638 |
| CD55     | 2       | 0.73743895 | 3.03E-46 | 5.53E-42   | 0.892 | 0.611 |
| MT2A     | 2       | 0.71945726 | 1.00E-47 | 1.83E-43   | 1     | 1     |
| RGCC     | 2       | 0.62089395 | 6.88E-32 | 1.26E-27   | 0.939 | 0.724 |
| TM4SF1   | 2       | 0.58690281 | 1.01E-33 | 1.84E-29   | 0.818 | 0.443 |
| CTSL     | 2       | 0.54333226 | 1.57E-22 | 2.87E-18   | 0.877 | 0.622 |
| UPP1     | 2       | 0.44800959 | 2.52E-26 | 4.60E-22   | 0.809 | 0.468 |
| TIMP3    | 2       | 0.44688912 | 6.22E-14 | 1.14E-09   | 0.689 | 0.486 |
| C11orf96 | 2       | 0.43376593 | 2.07E-17 | 3.78E-13   | 0.492 | 0.231 |
| C15orf48 | 2       | 0.43003336 | 1.56E-09 | 2.86E-05   | 0.256 | 0.106 |
| GSTO1    | 2       | 0.42849938 | 5.17E-22 | 9.44E-18   | 0.845 | 0.615 |
| TMSB10   | 2       | 0.42022589 | 7.26E-20 | 1.32E-15   | 0.998 | 0.993 |
| NT5E     | 2       | 0.4061562  | 4.48E-20 | 8.17E-16   | 0.532 | 0.26  |
| SNHG12   | 2       | 0.37193817 | 1.53E-15 | 2.80E-11   | 0.678 | 0.466 |
| S100A16  | 2       | 0.36347184 | 1.63E-14 | 2.98E-10   | 0.502 | 0.283 |
| NRP2     | 2       | 0.35636856 | 1.48E-08 | 0.00027047 | 0.519 | 0.369 |

|              |   |            |          |            |       |       |
|--------------|---|------------|----------|------------|-------|-------|
| S100A10      | 2 | 0.34467236 | 8.72E-16 | 1.59E-11   | 0.981 | 0.955 |
| TNFRSF12A    | 2 | 0.34373302 | 8.15E-19 | 1.49E-14   | 0.71  | 0.4   |
| TGM2         | 2 | 0.3354576  | 1.03E-15 | 1.87E-11   | 0.511 | 0.274 |
| EIF1         | 2 | 0.33143017 | 1.06E-25 | 1.94E-21   | 1     | 1     |
| ZFAS1        | 2 | 0.3142574  | 3.48E-21 | 6.35E-17   | 0.996 | 0.998 |
| STK17A       | 2 | 0.30854346 | 4.16E-13 | 7.58E-09   | 0.638 | 0.396 |
| FNIP2        | 2 | 0.3082838  | 4.28E-14 | 7.80E-10   | 0.468 | 0.253 |
| SH3BGRL3     | 2 | 0.29792724 | 6.63E-19 | 1.21E-14   | 0.996 | 0.989 |
| IER3         | 2 | 0.2973654  | 6.73E-09 | 0.0001228  | 0.445 | 0.274 |
| RGS10        | 2 | 0.29390401 | 1.60E-11 | 2.93E-07   | 0.612 | 0.446 |
| SMOX         | 2 | 0.29196692 | 2.96E-11 | 5.40E-07   | 0.504 | 0.321 |
| VIMP         | 2 | 0.28868879 | 9.20E-12 | 1.68E-07   | 0.79  | 0.643 |
| LRRFIP1      | 2 | 0.28453333 | 3.50E-12 | 6.38E-08   | 0.494 | 0.292 |
| AKAP12       | 2 | 0.28251322 | 2.07E-14 | 3.78E-10   | 0.246 | 0.066 |
| AC090498.1   | 2 | 0.28096012 | 1.88E-35 | 3.43E-31   | 1     | 1     |
| S100A6       | 2 | 0.28076771 | 7.01E-09 | 0.00012783 | 1     | 1     |
| EPB41L4A-AS1 | 2 | 0.28026944 | 4.78E-13 | 8.73E-09   | 0.915 | 0.819 |
| GYPC         | 2 | 0.27248679 | 5.22E-08 | 0.00095302 | 0.576 | 0.437 |
| PSMA7        | 2 | 0.27104751 | 1.54E-11 | 2.82E-07   | 0.858 | 0.747 |
| PLP2         | 2 | 0.26091108 | 2.99E-09 | 5.45E-05   | 0.799 | 0.681 |
| FXVD5        | 2 | 0.25078022 | 1.33E-12 | 2.42E-08   | 0.93  | 0.792 |
| LINC00152    | 2 | 0.25038942 | 2.99E-07 | 0.00545743 | 0.388 | 0.247 |
| FKBP10       | 2 | -0.2507879 | 4.19E-14 | 7.65E-10   | 0.191 | 0.421 |
| HLA-C        | 2 | -0.2508644 | 1.28E-08 | 0.00023285 | 0.725 | 0.835 |
| TTC3         | 2 | -0.2530032 | 4.09E-10 | 7.46E-06   | 0.403 | 0.595 |
| CNPY2        | 2 | -0.2535177 | 1.86E-10 | 3.40E-06   | 0.483 | 0.661 |
| N4BP2L2      | 2 | -0.2563859 | 8.98E-10 | 1.64E-05   | 0.585 | 0.742 |
| WFDC2        | 2 | -0.2564581 | 1.51E-21 | 2.76E-17   | 0.028 | 0.24  |
| NME4         | 2 | -0.2575863 | 1.02E-11 | 1.85E-07   | 0.222 | 0.423 |
| WSB1         | 2 | -0.2600481 | 4.58E-12 | 8.35E-08   | 0.722 | 0.837 |
| DUT          | 2 | -0.2601222 | 6.67E-12 | 1.22E-07   | 0.441 | 0.629 |
| SH3BGRL      | 2 | -0.2618515 | 3.03E-14 | 5.54E-10   | 0.216 | 0.448 |
| WBP5         | 2 | -0.2618798 | 9.24E-10 | 1.69E-05   | 0.644 | 0.765 |
| CHID1        | 2 | -0.2619806 | 1.12E-14 | 2.04E-10   | 0.244 | 0.486 |
| HSP90B1      | 2 | -0.2620135 | 3.50E-09 | 6.39E-05   | 0.608 | 0.74  |
| ID4          | 2 | -0.2623794 | 7.65E-07 | 0.0139506  | 0.278 | 0.419 |
| SUMF2        | 2 | -0.2635364 | 4.67E-14 | 8.52E-10   | 0.22  | 0.45  |
| NAMPT        | 2 | -0.2642356 | 5.35E-10 | 9.76E-06   | 0.481 | 0.633 |
| NT5C3A       | 2 | -0.2657474 | 2.98E-10 | 5.45E-06   | 0.214 | 0.398 |

|          |   |            |          |            |       |       |
|----------|---|------------|----------|------------|-------|-------|
| ISLR     | 2 | -0.2666949 | 5.59E-20 | 1.02E-15   | 0.07  | 0.303 |
| TPD52L1  | 2 | -0.2676104 | 4.73E-13 | 8.63E-09   | 0.169 | 0.373 |
| STK26    | 2 | -0.2679824 | 3.04E-13 | 5.55E-09   | 0.138 | 0.335 |
| TPI1     | 2 | -0.269277  | 2.20E-12 | 4.02E-08   | 0.987 | 0.993 |
| PABPC1   | 2 | -0.2701021 | 8.43E-13 | 1.54E-08   | 0.735 | 0.846 |
| IFI6     | 2 | -0.2711621 | 1.73E-09 | 3.16E-05   | 0.148 | 0.312 |
| PAPSS2   | 2 | -0.2732237 | 1.71E-10 | 3.11E-06   | 0.364 | 0.561 |
| RAB1A    | 2 | -0.2735368 | 3.66E-10 | 6.67E-06   | 0.646 | 0.769 |
| FAM162A  | 2 | -0.2736069 | 1.02E-10 | 1.85E-06   | 0.915 | 0.959 |
| NOL3     | 2 | -0.2741953 | 1.61E-10 | 2.95E-06   | 0.254 | 0.437 |
| BTG1     | 2 | -0.2747505 | 9.40E-09 | 0.00017154 | 0.977 | 0.982 |
| ATPIF1   | 2 | -0.2757784 | 6.30E-11 | 1.15E-06   | 0.445 | 0.622 |
| FXVD1    | 2 | -0.2769782 | 1.35E-14 | 2.47E-10   | 0.146 | 0.357 |
| AVPI1    | 2 | -0.2773879 | 1.45E-14 | 2.64E-10   | 0.161 | 0.385 |
| IFRD1    | 2 | -0.2778935 | 3.10E-10 | 5.65E-06   | 0.462 | 0.629 |
| NDUFA5   | 2 | -0.2787252 | 4.72E-13 | 8.62E-09   | 0.447 | 0.654 |
| SRGN     | 2 | -0.2792432 | 9.61E-12 | 1.75E-07   | 0.148 | 0.33  |
| C7orf73  | 2 | -0.2798754 | 2.80E-07 | 0.00510102 | 0.578 | 0.686 |
| COL9A2   | 2 | -0.2803051 | 1.71E-13 | 3.13E-09   | 0.11  | 0.303 |
| TPD52    | 2 | -0.2805714 | 2.06E-10 | 3.76E-06   | 0.534 | 0.676 |
| POLR2L   | 2 | -0.2807805 | 6.08E-10 | 1.11E-05   | 0.701 | 0.842 |
| HMG2     | 2 | -0.2809938 | 3.30E-15 | 6.02E-11   | 0.758 | 0.891 |
| IGF2     | 2 | -0.2836915 | 7.15E-10 | 1.31E-05   | 0.057 | 0.188 |
| CD320    | 2 | -0.2839227 | 1.05E-13 | 1.91E-09   | 0.246 | 0.459 |
| H3F3B    | 2 | -0.2847878 | 6.53E-17 | 1.19E-12   | 0.996 | 1     |
| PLXDC2   | 2 | -0.2863095 | 1.05E-13 | 1.92E-09   | 0.256 | 0.475 |
| SEPP1    | 2 | -0.2870285 | 4.07E-16 | 7.43E-12   | 0.144 | 0.373 |
| TCEAL8   | 2 | -0.287204  | 2.75E-14 | 5.02E-10   | 0.47  | 0.695 |
| GPX3     | 2 | -0.2876661 | 3.99E-10 | 7.29E-06   | 0.841 | 0.93  |
| PRDX2    | 2 | -0.2898549 | 6.73E-12 | 1.23E-07   | 0.559 | 0.71  |
| UBC      | 2 | -0.2900971 | 4.91E-08 | 0.00089518 | 0.841 | 0.923 |
| HNRNPA1  | 2 | -0.2916168 | 8.47E-16 | 1.55E-11   | 0.975 | 0.989 |
| CALD1    | 2 | -0.2948391 | 4.95E-13 | 9.03E-09   | 0.379 | 0.595 |
| PPP3CA   | 2 | -0.2956348 | 4.49E-09 | 8.19E-05   | 0.881 | 0.934 |
| SERPINA5 | 2 | -0.2959422 | 7.21E-18 | 1.32E-13   | 0.189 | 0.448 |
| MT-ND1   | 2 | -0.2973116 | 3.40E-07 | 0.00620037 | 0.419 | 0.563 |
| CCNG2    | 2 | -0.2984295 | 3.81E-11 | 6.95E-07   | 0.297 | 0.484 |
| CRTAC1   | 2 | -0.2998267 | 5.07E-13 | 9.25E-09   | 0.214 | 0.425 |
| FTL      | 2 | -0.3012558 | 1.67E-28 | 3.04E-24   | 1     | 1     |

|          |   |            |          |            |       |       |
|----------|---|------------|----------|------------|-------|-------|
| PNRC1    | 2 | -0.3013109 | 3.19E-10 | 5.82E-06   | 0.913 | 0.971 |
| MT-ND2   | 2 | -0.3013582 | 5.76E-11 | 1.05E-06   | 0.411 | 0.6   |
| BHLHE41  | 2 | -0.3044693 | 1.55E-16 | 2.83E-12   | 0.131 | 0.355 |
| SPON2    | 2 | -0.3054073 | 3.42E-17 | 6.23E-13   | 0.055 | 0.251 |
| CDO1     | 2 | -0.3080549 | 4.03E-17 | 7.35E-13   | 0.091 | 0.308 |
| TMEM59   | 2 | -0.3091202 | 5.52E-14 | 1.01E-09   | 0.949 | 0.977 |
| MT-CO2   | 2 | -0.3099461 | 3.59E-07 | 0.00654898 | 0.919 | 0.946 |
| CTSF     | 2 | -0.3101224 | 2.12E-22 | 3.87E-18   | 0.085 | 0.344 |
| PRDX4    | 2 | -0.3136859 | 2.43E-12 | 4.43E-08   | 0.553 | 0.706 |
| PTP4A1   | 2 | -0.3136923 | 4.94E-07 | 0.00901103 | 0.451 | 0.586 |
| MT-ATP6  | 2 | -0.3137998 | 1.46E-07 | 0.00266622 | 0.71  | 0.794 |
| ID2      | 2 | -0.3147163 | 2.32E-09 | 4.23E-05   | 0.324 | 0.502 |
| LRPAP1   | 2 | -0.3164585 | 3.49E-14 | 6.38E-10   | 0.265 | 0.482 |
| BNIP3    | 2 | -0.3201605 | 4.04E-11 | 7.37E-07   | 0.998 | 0.998 |
| PGK1     | 2 | -0.3205727 | 5.06E-13 | 9.24E-09   | 0.909 | 0.966 |
| GSN      | 2 | -0.3211779 | 2.52E-16 | 4.60E-12   | 0.227 | 0.466 |
| PEBP1    | 2 | -0.3215362 | 1.91E-15 | 3.48E-11   | 0.523 | 0.744 |
| HLA-A    | 2 | -0.3220492 | 2.66E-11 | 4.85E-07   | 0.754 | 0.851 |
| SNRPN    | 2 | -0.3257204 | 2.74E-17 | 5.00E-13   | 0.504 | 0.731 |
| NEAT1    | 2 | -0.3280959 | 3.06E-12 | 5.58E-08   | 0.972 | 0.977 |
| IFITM2   | 2 | -0.3312123 | 1.30E-13 | 2.38E-09   | 0.769 | 0.891 |
| ITM2B    | 2 | -0.3354813 | 1.04E-17 | 1.90E-13   | 0.917 | 0.984 |
| COL6A2   | 2 | -0.3382809 | 4.47E-16 | 8.16E-12   | 0.309 | 0.545 |
| PPP1R3C  | 2 | -0.340993  | 7.05E-13 | 1.29E-08   | 0.25  | 0.45  |
| SERPING1 | 2 | -0.3442315 | 8.30E-17 | 1.51E-12   | 0.32  | 0.575 |
| SERPINA1 | 2 | -0.3448295 | 6.00E-20 | 1.10E-15   | 0.919 | 0.989 |
| EEF1A1   | 2 | -0.3490571 | 6.30E-42 | 1.15E-37   | 1     | 1     |
| PSAP     | 2 | -0.3502027 | 2.30E-19 | 4.19E-15   | 0.761 | 0.923 |
| EID1     | 2 | -0.3504568 | 1.44E-22 | 2.62E-18   | 0.797 | 0.932 |
| TGFBI    | 2 | -0.3517776 | 8.62E-12 | 1.57E-07   | 0.443 | 0.64  |
| EEF2     | 2 | -0.3528421 | 2.43E-19 | 4.44E-15   | 0.962 | 0.98  |
| IFITM1   | 2 | -0.3603491 | 2.70E-13 | 4.93E-09   | 0.311 | 0.525 |
| P4HB     | 2 | -0.3630106 | 9.24E-17 | 1.69E-12   | 0.508 | 0.729 |
| ATRAID   | 2 | -0.3640149 | 1.65E-18 | 3.01E-14   | 0.636 | 0.819 |
| CRIP1    | 2 | -0.365585  | 2.71E-22 | 4.95E-18   | 0.157 | 0.448 |
| DUSP1    | 2 | -0.3704346 | 3.71E-12 | 6.76E-08   | 0.328 | 0.529 |
| SERF2    | 2 | -0.3713748 | 9.12E-28 | 1.66E-23   | 0.998 | 1     |
| CEBPD    | 2 | -0.3740063 | 8.68E-10 | 1.58E-05   | 0.619 | 0.731 |
| FAM46A   | 2 | -0.3774249 | 2.28E-15 | 4.16E-11   | 0.364 | 0.584 |

|          |   |            |          |            |       |       |
|----------|---|------------|----------|------------|-------|-------|
| MMP3     | 2 | -0.3776968 | 5.20E-13 | 9.48E-09   | 0.814 | 0.921 |
| LSP1     | 2 | -0.3785707 | 3.26E-25 | 5.94E-21   | 0.059 | 0.326 |
| MFGE8    | 2 | -0.3835727 | 2.76E-16 | 5.04E-12   | 0.608 | 0.79  |
| NAA38    | 2 | -0.3928239 | 6.38E-22 | 1.16E-17   | 0.434 | 0.695 |
| NUCB1    | 2 | -0.3935287 | 1.60E-23 | 2.91E-19   | 0.318 | 0.606 |
| B2M      | 2 | -0.3946481 | 1.06E-24 | 1.94E-20   | 0.96  | 0.977 |
| LY6E     | 2 | -0.3950908 | 1.84E-25 | 3.36E-21   | 0.208 | 0.525 |
| NNMT     | 2 | -0.3962421 | 1.68E-13 | 3.06E-09   | 0.807 | 0.916 |
| PRKAR1A  | 2 | -0.3989658 | 3.50E-21 | 6.38E-17   | 0.407 | 0.686 |
| PKM      | 2 | -0.3990706 | 2.27E-18 | 4.15E-14   | 0.818 | 0.914 |
| CA9      | 2 | -0.4011556 | 2.27E-16 | 4.13E-12   | 0.316 | 0.543 |
| S100A4   | 2 | -0.4016938 | 4.36E-15 | 7.95E-11   | 0.547 | 0.749 |
| DDIT4    | 2 | -0.4038703 | 1.70E-12 | 3.10E-08   | 0.32  | 0.52  |
| MT1G     | 2 | -0.4053098 | 1.74E-23 | 3.18E-19   | 1     | 1     |
| IFITM3   | 2 | -0.4062538 | 1.32E-18 | 2.41E-14   | 0.803 | 0.928 |
| VKORC1   | 2 | -0.4065957 | 1.73E-23 | 3.16E-19   | 0.862 | 0.971 |
| RHOBTB3  | 2 | -0.4065957 | 3.48E-15 | 6.35E-11   | 0.307 | 0.527 |
| CAPS     | 2 | -0.4084772 | 5.53E-09 | 0.00010092 | 0.468 | 0.624 |
| DDR2     | 2 | -0.4123629 | 3.99E-20 | 7.28E-16   | 0.195 | 0.455 |
| PLD3     | 2 | -0.416326  | 1.23E-25 | 2.25E-21   | 0.197 | 0.509 |
| SDC2     | 2 | -0.4165404 | 1.17E-21 | 2.13E-17   | 0.54  | 0.787 |
| PAX1     | 2 | -0.4231002 | 2.81E-18 | 5.12E-14   | 0.28  | 0.529 |
| FBXO2    | 2 | -0.4237079 | 2.00E-22 | 3.65E-18   | 0.426 | 0.692 |
| C1S      | 2 | -0.4237697 | 2.49E-22 | 4.55E-18   | 0.386 | 0.665 |
| MDFI     | 2 | -0.424837  | 9.90E-16 | 1.81E-11   | 0.248 | 0.466 |
| ITM2C    | 2 | -0.426364  | 2.49E-23 | 4.54E-19   | 0.155 | 0.439 |
| SLC39A8  | 2 | -0.4278473 | 7.06E-24 | 1.29E-19   | 0.201 | 0.493 |
| VCAN     | 2 | -0.429697  | 3.00E-26 | 5.47E-22   | 0.106 | 0.405 |
| NDUFA4L2 | 2 | -0.4326996 | 4.99E-58 | 9.11E-54   | 1     | 1     |
| EGLN3    | 2 | -0.4331445 | 1.26E-17 | 2.31E-13   | 0.235 | 0.475 |
| ID1      | 2 | -0.4391688 | 1.78E-07 | 0.00324002 | 0.347 | 0.491 |
| EGR1     | 2 | -0.4402676 | 5.25E-11 | 9.57E-07   | 0.233 | 0.416 |
| IGFBP7   | 2 | -0.4409393 | 1.87E-24 | 3.42E-20   | 0.585 | 0.855 |
| TSC22D1  | 2 | -0.4420342 | 1.12E-08 | 0.00020403 | 0.5   | 0.647 |
| SAT1     | 2 | -0.4424844 | 5.77E-23 | 1.05E-18   | 0.839 | 0.977 |
| CD99     | 2 | -0.4501471 | 9.23E-29 | 1.68E-24   | 0.727 | 0.912 |
| COL11A2  | 2 | -0.4515257 | 1.80E-22 | 3.29E-18   | 0.218 | 0.505 |
| HTRA1    | 2 | -0.4623665 | 2.05E-23 | 3.75E-19   | 0.487 | 0.756 |
| PAM      | 2 | -0.4818295 | 8.47E-28 | 1.55E-23   | 0.324 | 0.64  |

|         |   |            |          |          |       |       |
|---------|---|------------|----------|----------|-------|-------|
| NGFRAP1 | 2 | -0.4907737 | 4.73E-29 | 8.63E-25 | 0.572 | 0.837 |
| IGFBP6  | 2 | -0.4923011 | 8.56E-10 | 1.56E-05 | 0.39  | 0.554 |
| FOS     | 2 | -0.4987636 | 1.11E-18 | 2.03E-14 | 0.407 | 0.636 |
| CFD     | 2 | -0.5063629 | 3.18E-25 | 5.81E-21 | 0.044 | 0.299 |
| MALAT1  | 2 | -0.5106556 | 3.26E-40 | 5.95E-36 | 1     | 1     |
| HIF1A   | 2 | -0.5132044 | 3.94E-34 | 7.19E-30 | 0.659 | 0.928 |
| GAPDH   | 2 | -0.5132542 | 3.57E-24 | 6.51E-20 | 1     | 1     |
| PCOLCE2 | 2 | -0.5140652 | 1.79E-33 | 3.27E-29 | 0.744 | 0.939 |
| CLEC3A  | 2 | -0.5198424 | 2.32E-18 | 4.24E-14 | 0.112 | 0.355 |
| ADM     | 2 | -0.5201476 | 1.82E-12 | 3.32E-08 | 0.699 | 0.803 |
| CP      | 2 | -0.53686   | 8.25E-15 | 1.51E-10 | 0.485 | 0.658 |
| SCRG1   | 2 | -0.5448685 | 9.32E-19 | 1.70E-14 | 0.913 | 0.975 |
| FXVD6   | 2 | -0.5468005 | 5.93E-28 | 1.08E-23 | 0.498 | 0.758 |
| NOVA1   | 2 | -0.5485681 | 1.63E-15 | 2.98E-11 | 0.748 | 0.878 |
| JUNB    | 2 | -0.5545899 | 3.44E-14 | 6.28E-10 | 0.481 | 0.656 |
| COL9A3  | 2 | -0.57057   | 4.42E-30 | 8.07E-26 | 0.227 | 0.59  |
| WWP2    | 2 | -0.5806964 | 4.43E-29 | 8.08E-25 | 0.383 | 0.683 |
| CST3    | 2 | -0.5939968 | 4.70E-48 | 8.58E-44 | 0.947 | 0.998 |
| IGFBP5  | 2 | -0.5994842 | 1.29E-27 | 2.35E-23 | 0.061 | 0.344 |
| CLU     | 2 | -0.6029546 | 2.84E-32 | 5.18E-28 | 0.996 | 1     |
| BAMBI   | 2 | -0.6098398 | 1.85E-25 | 3.38E-21 | 0.324 | 0.618 |
| MT1F    | 2 | -0.6178799 | 1.62E-26 | 2.95E-22 | 0.975 | 0.995 |
| COL2A1  | 2 | -0.6247497 | 9.38E-23 | 1.71E-18 | 0.254 | 0.541 |
| ID3     | 2 | -0.635848  | 2.41E-13 | 4.39E-09 | 0.214 | 0.414 |
| EPYC    | 2 | -0.6359494 | 6.53E-34 | 1.19E-29 | 0.04  | 0.351 |
| COL11A1 | 2 | -0.6385128 | 5.50E-39 | 1.00E-34 | 0.297 | 0.706 |
| LUM     | 2 | -0.6407837 | 7.97E-35 | 1.45E-30 | 1     | 1     |
| FGFBP2  | 2 | -0.6472095 | 1.61E-28 | 2.93E-24 | 0.883 | 0.968 |
| FMOD    | 2 | -0.6543969 | 5.41E-48 | 9.88E-44 | 0.627 | 0.923 |
| LCN2    | 2 | -0.6783307 | 5.69E-18 | 1.04E-13 | 0.337 | 0.593 |
| RBP4    | 2 | -0.6827018 | 5.07E-26 | 9.25E-22 | 0.413 | 0.722 |
| CHI3L1  | 2 | -0.7039159 | 6.28E-26 | 1.15E-21 | 0.886 | 0.986 |
| PLAC9   | 2 | -0.7042281 | 2.87E-30 | 5.23E-26 | 0.511 | 0.796 |
| C2orf40 | 2 | -0.7267669 | 3.79E-40 | 6.92E-36 | 0.928 | 0.998 |
| S100B   | 2 | -0.7471072 | 1.10E-35 | 2.01E-31 | 0.436 | 0.749 |
| DCN     | 2 | -0.7597277 | 3.73E-69 | 6.81E-65 | 1     | 1     |
| ACAN    | 2 | -0.7691965 | 1.18E-40 | 2.15E-36 | 0.752 | 0.946 |
| OGN     | 2 | -0.7928418 | 6.10E-31 | 1.11E-26 | 0.606 | 0.894 |
| LECT1   | 2 | -0.9203668 | 7.32E-58 | 1.34E-53 | 0.394 | 0.86  |

|             |                |                  |              |                  |              |              |
|-------------|----------------|------------------|--------------|------------------|--------------|--------------|
| PRELP       | 2              | -0.9640905       | 2.48E-64     | 4.53E-60         | 0.771        | 0.975        |
| CHI3L2      | 2              | -0.9926551       | 3.73E-54     | 6.81E-50         | 0.544        | 0.928        |
| CCDC80      | 2              | -1.1889475       | 2.41E-71     | 4.39E-67         | 0.72         | 0.982        |
| PLA2G2A     | 2              | -1.2164005       | 3.92E-45     | 7.16E-41         | 0.288        | 0.749        |
| CTSD        | 2              | -1.2603706       | 8.52E-77     | 1.56E-72         | 0.682        | 0.991        |
| SLPI        | 2              | -1.5795046       | 2.06E-47     | 3.76E-43         | 0.824        | 0.98         |
| <b>gene</b> | <b>cluster</b> | <b>avg_logFC</b> | <b>p_val</b> | <b>p_val_adj</b> | <b>pct.1</b> | <b>pct.2</b> |
| CXCL8       | 3              | 1.27483819       | 2.15E-12     | 3.93E-08         | 0.409        | 0.173        |
| TFPI2       | 3              | 0.7575551        | 2.12E-08     | 0.00038654       | 0.276        | 0.114        |
| CD55        | 3              | 0.70548193       | 1.54E-31     | 2.81E-27         | 0.919        | 0.697        |
| HMGA1       | 3              | 0.66518018       | 1.03E-23     | 1.89E-19         | 0.838        | 0.596        |
| C11orf96    | 3              | 0.60821777       | 1.57E-17     | 2.86E-13         | 0.684        | 0.42         |
| PRG4        | 3              | 0.59553837       | 2.81E-08     | 0.0005122        | 0.722        | 0.537        |
| RGCC        | 3              | 0.54921235       | 3.84E-16     | 7.01E-12         | 0.862        | 0.651        |
| IER3        | 3              | 0.53878941       | 6.90E-09     | 0.00012582       | 0.691        | 0.511        |
| TIMP3       | 3              | 0.46167471       | 1.26E-10     | 2.30E-06         | 0.67         | 0.479        |
| NRP2        | 3              | 0.42074561       | 9.69E-07     | 0.01769043       | 0.679        | 0.573        |
| TMSB4X      | 3              | 0.39671274       | 8.84E-08     | 0.00161316       | 0.85         | 0.687        |
| SLC7A2      | 3              | 0.31508244       | 9.64E-08     | 0.00175829       | 0.698        | 0.518        |
| FNIP2       | 3              | 0.31504333       | 2.02E-12     | 3.69E-08         | 0.587        | 0.339        |
| MT2A        | 3              | 0.31159267       | 1.31E-10     | 2.39E-06         | 1            | 1            |
| TIMP2       | 3              | 0.29198604       | 1.33E-09     | 2.42E-05         | 0.715        | 0.544        |
| FAP         | 3              | 0.28548114       | 2.20E-11     | 4.02E-07         | 0.435        | 0.202        |
| GPX4        | 3              | 0.27320178       | 2.80E-12     | 5.11E-08         | 0.998        | 0.99         |
| RHOC        | 3              | 0.26673729       | 6.29E-08     | 0.00114859       | 0.836        | 0.678        |
| AKAP12      | 3              | 0.25389723       | 1.77E-06     | 0.0323761        | 0.259        | 0.124        |
| RABGGTB     | 3              | 0.25281605       | 7.01E-09     | 0.00012797       | 0.874        | 0.818        |
| CTSF        | 3              | -0.2516606       | 6.86E-11     | 1.25E-06         | 0.133        | 0.322        |
| CALR        | 3              | -0.2565085       | 5.29E-07     | 0.00965683       | 0.411        | 0.567        |
| GLTSCR2     | 3              | -0.2567217       | 2.48E-12     | 4.53E-08         | 0.85         | 0.935        |
| SNRPN       | 3              | -0.259933        | 2.95E-09     | 5.39E-05         | 0.575        | 0.71         |
| TPI1        | 3              | -0.2608663       | 4.83E-10     | 8.81E-06         | 0.974        | 0.987        |
| FBXO2       | 3              | -0.2613198       | 6.31E-07     | 0.01151963       | 0.435        | 0.573        |
| EEF1A1      | 3              | -0.262415        | 4.64E-21     | 8.47E-17         | 1            | 1            |
| ITM2B       | 3              | -0.2638664       | 2.66E-09     | 4.85E-05         | 0.952        | 0.964        |
| B2M         | 3              | -0.2650457       | 1.44E-12     | 2.63E-08         | 0.988        | 0.993        |
| IGFBP7      | 3              | -0.2656178       | 5.06E-09     | 9.23E-05         | 0.641        | 0.831        |
| PRDX2       | 3              | -0.2668813       | 1.66E-07     | 0.00302263       | 0.575        | 0.697        |
| EID1        | 3              | -0.2712945       | 2.92E-10     | 5.32E-06         | 0.781        | 0.876        |



|          |   |            |          |            |       |       |
|----------|---|------------|----------|------------|-------|-------|
| COL6A2   | 3 | -0.2718399 | 1.26E-09 | 2.30E-05   | 0.359 | 0.557 |
| CALD1    | 3 | -0.2724766 | 2.66E-09 | 4.85E-05   | 0.461 | 0.648 |
| PGK1     | 3 | -0.2812905 | 2.12E-08 | 0.00038618 | 0.905 | 0.958 |
| ATRAID   | 3 | -0.2815205 | 5.91E-11 | 1.08E-06   | 0.656 | 0.837 |
| LUM      | 3 | -0.28213   | 1.17E-09 | 2.14E-05   | 1     | 1     |
| IFITM1   | 3 | -0.2845582 | 7.26E-09 | 0.00013253 | 0.278 | 0.466 |
| SDF4     | 3 | -0.2847622 | 2.21E-11 | 4.04E-07   | 0.368 | 0.58  |
| SNAI2    | 3 | -0.2882351 | 2.43E-07 | 0.00444181 | 0.228 | 0.388 |
| VKORC1   | 3 | -0.2892882 | 1.08E-10 | 1.96E-06   | 0.812 | 0.893 |
| EEF2     | 3 | -0.2905992 | 3.40E-12 | 6.20E-08   | 0.964 | 0.99  |
| TGFBI    | 3 | -0.2916552 | 5.81E-07 | 0.01060176 | 0.42  | 0.58  |
| GSN      | 3 | -0.2932701 | 3.45E-11 | 6.29E-07   | 0.219 | 0.436 |
| WSB1     | 3 | -0.294884  | 2.55E-10 | 4.65E-06   | 0.746 | 0.906 |
| FAM46A   | 3 | -0.2987172 | 3.24E-08 | 0.0005909  | 0.366 | 0.528 |
| WFDC2    | 3 | -0.2998212 | 6.21E-17 | 1.13E-12   | 0.045 | 0.257 |
| FXVD6    | 3 | -0.3004395 | 6.82E-10 | 1.24E-05   | 0.494 | 0.684 |
| PPP1R3C  | 3 | -0.3064654 | 1.42E-12 | 2.59E-08   | 0.204 | 0.436 |
| HTRA1    | 3 | -0.3072328 | 4.31E-08 | 0.00078666 | 0.466 | 0.655 |
| SOD3     | 3 | -0.3092115 | 7.69E-09 | 0.0001403  | 0.907 | 0.967 |
| BNIP3    | 3 | -0.3107619 | 2.55E-11 | 4.65E-07   | 0.995 | 1     |
| SERPINA1 | 3 | -0.3120775 | 2.08E-09 | 3.79E-05   | 0.924 | 0.967 |
| FGFBP2   | 3 | -0.313862  | 1.21E-06 | 0.02202533 | 0.872 | 0.958 |
| NAMPT    | 3 | -0.3225256 | 4.51E-12 | 8.23E-08   | 0.651 | 0.808 |
| CDO1     | 3 | -0.3238496 | 1.30E-09 | 2.37E-05   | 0.133 | 0.306 |
| HMG2     | 3 | -0.3261389 | 2.32E-13 | 4.23E-09   | 0.748 | 0.886 |
| SERP1    | 3 | -0.3272138 | 6.40E-11 | 1.17E-06   | 0.423 | 0.632 |
| MFGE8    | 3 | -0.3331768 | 1.69E-10 | 3.09E-06   | 0.615 | 0.795 |
| COL11A1  | 3 | -0.3364399 | 1.58E-10 | 2.88E-06   | 0.235 | 0.45  |
| NDUFA4L2 | 3 | -0.3369415 | 5.58E-27 | 1.02E-22   | 1     | 1     |
| PKM      | 3 | -0.3373531 | 6.40E-13 | 1.17E-08   | 0.822 | 0.899 |
| ID2      | 3 | -0.3395392 | 3.21E-08 | 0.00058658 | 0.489 | 0.632 |
| DDIT4L   | 3 | -0.3445284 | 7.32E-07 | 0.01335268 | 0.817 | 0.899 |
| NGFRAP1  | 3 | -0.3445986 | 6.21E-11 | 1.13E-06   | 0.513 | 0.691 |
| HLA-A    | 3 | -0.34777   | 1.79E-11 | 3.27E-07   | 0.781 | 0.883 |
| MAOB     | 3 | -0.3491772 | 3.31E-13 | 6.04E-09   | 0.285 | 0.528 |
| MT1G     | 3 | -0.3534027 | 1.83E-06 | 0.03346782 | 0.981 | 0.99  |
| CA9      | 3 | -0.3541945 | 3.40E-11 | 6.20E-07   | 0.318 | 0.534 |
| COL2A1   | 3 | -0.3587255 | 1.20E-11 | 2.19E-07   | 0.2   | 0.42  |
| COL9A3   | 3 | -0.3637091 | 5.73E-12 | 1.04E-07   | 0.185 | 0.404 |

|         |         |            |          |            |       |       |
|---------|---------|------------|----------|------------|-------|-------|
| C1S     | 3       | -0.3669534 | 1.21E-14 | 2.21E-10   | 0.527 | 0.73  |
| NNMT    | 3       | -0.3738927 | 1.77E-10 | 3.23E-06   | 0.781 | 0.863 |
| IFITM3  | 3       | -0.382432  | 7.70E-15 | 1.40E-10   | 0.8   | 0.925 |
| CFD     | 3       | -0.3943754 | 2.20E-12 | 4.01E-08   | 0.095 | 0.29  |
| PLAC9   | 3       | -0.4136301 | 2.02E-11 | 3.69E-07   | 0.42  | 0.645 |
| ADM     | 3       | -0.4209936 | 3.00E-12 | 5.48E-08   | 0.72  | 0.87  |
| HIF1A   | 3       | -0.4220157 | 7.05E-18 | 1.29E-13   | 0.542 | 0.795 |
| EGR1    | 3       | -0.4501523 | 2.73E-09 | 4.99E-05   | 0.247 | 0.433 |
| MALAT1  | 3       | -0.4550185 | 1.48E-26 | 2.71E-22   | 1     | 1     |
| GAPDH   | 3       | -0.4614092 | 1.18E-23 | 2.15E-19   | 1     | 1     |
| SLC39A8 | 3       | -0.4628927 | 1.17E-19 | 2.13E-15   | 0.361 | 0.648 |
| FOS     | 3       | -0.4711255 | 5.97E-11 | 1.09E-06   | 0.371 | 0.557 |
| ACAN    | 3       | -0.4724019 | 1.81E-16 | 3.30E-12   | 0.646 | 0.857 |
| S100B   | 3       | -0.473642  | 6.19E-16 | 1.13E-11   | 0.392 | 0.655 |
| CCDC85B | 3       | -0.4773248 | 3.09E-12 | 5.64E-08   | 0.895 | 0.948 |
| PCOLCE2 | 3       | -0.4819292 | 2.01E-24 | 3.67E-20   | 0.732 | 0.928 |
| IFITM2  | 3       | -0.4891425 | 3.06E-19 | 5.58E-15   | 0.743 | 0.896 |
| JUNB    | 3       | -0.5017376 | 3.33E-07 | 0.00607245 | 0.534 | 0.658 |
| OGN     | 3       | -0.5033247 | 9.62E-14 | 1.76E-09   | 0.42  | 0.681 |
| FMOD    | 3       | -0.5082797 | 2.60E-26 | 4.75E-22   | 0.501 | 0.824 |
| CST3    | 3       | -0.5439275 | 2.05E-26 | 3.75E-22   | 0.931 | 0.984 |
| MT1F    | 3       | -0.5529759 | 1.16E-12 | 2.11E-08   | 0.929 | 0.974 |
| RBP4    | 3       | -0.5672658 | 7.38E-22 | 1.35E-17   | 0.34  | 0.648 |
| LECT1   | 3       | -0.6187715 | 8.37E-28 | 1.53E-23   | 0.259 | 0.638 |
| CLU     | 3       | -0.6330888 | 2.35E-26 | 4.28E-22   | 0.995 | 1     |
| G0S2    | 3       | -0.6502804 | 6.36E-11 | 1.16E-06   | 0.496 | 0.707 |
| C2orf40 | 3       | -0.6619168 | 2.67E-26 | 4.87E-22   | 0.886 | 0.98  |
| IGFBP5  | 3       | -0.667489  | 3.45E-22 | 6.29E-18   | 0.074 | 0.358 |
| DCN     | 3       | -0.6931783 | 1.94E-40 | 3.54E-36   | 0.995 | 1     |
| LCN2    | 3       | -0.7061518 | 1.88E-10 | 3.42E-06   | 0.475 | 0.642 |
| PLA2G2A | 3       | -0.7454265 | 1.59E-26 | 2.90E-22   | 0.278 | 0.678 |
| CHI3L1  | 3       | -0.7460432 | 2.76E-24 | 5.03E-20   | 0.857 | 0.984 |
| PRELP   | 3       | -0.8379369 | 8.35E-35 | 1.52E-30   | 0.67  | 0.928 |
| CCDC80  | 3       | -0.8629784 | 2.23E-28 | 4.07E-24   | 0.618 | 0.866 |
| CHI3L2  | 3       | -0.959927  | 2.71E-35 | 4.95E-31   | 0.705 | 0.964 |
| CTSD    | 3       | -0.9976897 | 1.55E-41 | 2.83E-37   | 0.72  | 0.951 |
| SLPI    | 3       | -1.0157929 | 6.78E-30 | 1.24E-25   | 0.765 | 0.951 |
| gene    | cluster | avg_logFC  | p_val    | p_val_adj  | pct.1 | pct.2 |
| MT2A    | 4       | 1.20009219 | 6.22E-17 | 1.13E-12   | 1     | 1     |

|             |   |            |          |            |       |       |
|-------------|---|------------|----------|------------|-------|-------|
| LINC00152   | 4 | 0.89844905 | 7.46E-16 | 1.36E-11   | 0.846 | 0.559 |
| IGFBP3      | 4 | 0.84354733 | 4.49E-10 | 8.19E-06   | 0.615 | 0.332 |
| MSMP        | 4 | 0.76446186 | 1.65E-06 | 0.03008542 | 0.25  | 0.077 |
| TM4SF1      | 4 | 0.71879562 | 6.61E-15 | 1.21E-10   | 0.763 | 0.409 |
| SERPINE2    | 4 | 0.65290243 | 7.29E-15 | 1.33E-10   | 1     | 1     |
| MIR4435-2HG | 4 | 0.62012205 | 3.73E-12 | 6.81E-08   | 0.673 | 0.377 |
| TPM1        | 4 | 0.61555872 | 4.23E-11 | 7.72E-07   | 0.821 | 0.65  |
| LGALS1      | 4 | 0.61236611 | 3.34E-15 | 6.10E-11   | 0.994 | 0.991 |
| RND3        | 4 | 0.5915209  | 1.06E-07 | 0.00193966 | 0.436 | 0.214 |
| NT5E        | 4 | 0.55160086 | 7.52E-15 | 1.37E-10   | 0.679 | 0.323 |
| IER3        | 4 | 0.54184145 | 2.30E-07 | 0.00419949 | 0.449 | 0.214 |
| HMGA1       | 4 | 0.53466633 | 2.81E-10 | 5.13E-06   | 0.423 | 0.145 |
| CTSL        | 4 | 0.50251993 | 3.22E-07 | 0.0058698  | 0.622 | 0.395 |
| GSTO1       | 4 | 0.49337676 | 1.18E-08 | 0.00021607 | 0.686 | 0.445 |
| TNFRSF12A   | 4 | 0.48164133 | 7.33E-10 | 1.34E-05   | 0.673 | 0.373 |
| FHL2        | 4 | 0.48067562 | 1.38E-10 | 2.52E-06   | 0.429 | 0.159 |
| UPP1        | 4 | 0.47238892 | 1.18E-07 | 0.00214836 | 0.513 | 0.273 |
| VMP1        | 4 | 0.46804471 | 4.52E-09 | 8.24E-05   | 0.821 | 0.659 |
| TMSB10      | 4 | 0.44698209 | 1.12E-08 | 0.0002044  | 1     | 0.995 |
| FN1         | 4 | 0.42687964 | 7.25E-12 | 1.32E-07   | 1     | 1     |
| TGM2        | 4 | 0.39742425 | 1.27E-08 | 0.00023127 | 0.353 | 0.123 |
| TNC         | 4 | 0.39469163 | 1.11E-10 | 2.03E-06   | 0.455 | 0.164 |
| STK17A      | 4 | 0.38875664 | 2.83E-07 | 0.00516482 | 0.474 | 0.236 |
| GYPC        | 4 | 0.38690491 | 7.85E-08 | 0.00143296 | 0.628 | 0.382 |
| COL6A3      | 4 | 0.37094712 | 1.87E-07 | 0.00340647 | 0.622 | 0.405 |
| PLAUR       | 4 | 0.37043979 | 1.14E-07 | 0.00208372 | 0.494 | 0.241 |
| EIF1        | 4 | 0.35601404 | 5.48E-10 | 1.00E-05   | 1     | 1     |
| FAP         | 4 | 0.35035051 | 1.30E-09 | 2.36E-05   | 0.558 | 0.273 |
| PMEPA1      | 4 | 0.32983403 | 2.12E-06 | 0.03868377 | 0.455 | 0.245 |
| BRI3        | 4 | 0.32129868 | 5.65E-09 | 0.0001031  | 0.955 | 0.864 |
| SPP1        | 4 | 0.30977393 | 1.40E-06 | 0.02556322 | 0.769 | 0.582 |
| SLC25A6     | 4 | 0.2760128  | 1.09E-08 | 0.0001985  | 0.994 | 0.964 |
| KIFC3       | 4 | 0.27062066 | 1.92E-09 | 3.50E-05   | 0.333 | 0.091 |
| SGIP1       | 4 | 0.26602279 | 1.32E-07 | 0.00240319 | 0.346 | 0.123 |
| STK26       | 4 | -0.2507605 | 1.36E-06 | 0.02479049 | 0.186 | 0.427 |
| ANAPC13     | 4 | -0.2652925 | 2.35E-06 | 0.04285267 | 0.301 | 0.523 |
| IFI16       | 4 | -0.271989  | 1.09E-06 | 0.0198245  | 0.179 | 0.409 |
| IFITM10     | 4 | -0.2761252 | 1.01E-06 | 0.01851559 | 0.385 | 0.645 |
| LBH         | 4 | -0.2793318 | 1.10E-08 | 0.00020016 | 0.064 | 0.309 |

|          |   |            |          |            |       |       |
|----------|---|------------|----------|------------|-------|-------|
| N4BP2L2  | 4 | -0.2819344 | 2.64E-06 | 0.04819604 | 0.763 | 0.868 |
| HMG2     | 4 | -0.2849671 | 3.50E-07 | 0.00638967 | 0.795 | 0.877 |
| LY6E     | 4 | -0.2859439 | 5.83E-07 | 0.01064228 | 0.506 | 0.723 |
| PFN2     | 4 | -0.2943159 | 7.77E-07 | 0.01418399 | 0.41  | 0.645 |
| PCOLCE2  | 4 | -0.2952552 | 1.25E-06 | 0.02272063 | 0.872 | 0.914 |
| SMIM5    | 4 | -0.2962658 | 2.18E-08 | 0.00039839 | 0.077 | 0.323 |
| TMEM230  | 4 | -0.301216  | 2.09E-07 | 0.00381963 | 0.776 | 0.886 |
| POLR2L   | 4 | -0.3022436 | 4.85E-07 | 0.00884869 | 0.942 | 0.982 |
| SERPINA1 | 4 | -0.3038486 | 1.17E-09 | 2.14E-05   | 0.84  | 0.973 |
| CNPY2    | 4 | -0.3045007 | 3.61E-07 | 0.00658415 | 0.647 | 0.832 |
| SRP9     | 4 | -0.3081738 | 7.61E-09 | 0.00013885 | 0.705 | 0.873 |
| TSPAN3   | 4 | -0.308738  | 8.42E-07 | 0.01536648 | 0.327 | 0.568 |
| TCEA1    | 4 | -0.3114486 | 2.82E-07 | 0.00515471 | 0.583 | 0.768 |
| H3F3B    | 4 | -0.3132271 | 2.34E-10 | 4.27E-06   | 1     | 1     |
| NDUFA4L2 | 4 | -0.3170412 | 5.52E-16 | 1.01E-11   | 1     | 1     |
| SNRPN    | 4 | -0.3257658 | 7.09E-08 | 0.00129333 | 0.564 | 0.782 |
| TMEM59   | 4 | -0.3269549 | 1.82E-07 | 0.00331552 | 0.878 | 0.973 |
| MGP      | 4 | -0.3379242 | 2.51E-07 | 0.00457532 | 0.994 | 1     |
| NNMT     | 4 | -0.3384704 | 4.01E-09 | 7.32E-05   | 0.91  | 0.982 |
| TMED10   | 4 | -0.3446363 | 8.68E-10 | 1.58E-05   | 0.763 | 0.9   |
| CST3     | 4 | -0.3470812 | 3.98E-11 | 7.26E-07   | 0.994 | 0.991 |
| SPON2    | 4 | -0.3493756 | 7.02E-09 | 0.00012811 | 0.071 | 0.318 |
| C7orf73  | 4 | -0.3493756 | 1.95E-08 | 0.00035519 | 0.84  | 0.959 |
| FMOD     | 4 | -0.3587324 | 1.79E-10 | 3.26E-06   | 0.904 | 0.982 |
| RHOBTB3  | 4 | -0.3762831 | 8.23E-08 | 0.00150207 | 0.494 | 0.677 |
| ISLR     | 4 | -0.3858213 | 9.17E-09 | 0.0001673  | 0.301 | 0.582 |
| PAX1     | 4 | -0.3869869 | 3.23E-07 | 0.00589096 | 0.474 | 0.673 |
| AK1      | 4 | -0.3950018 | 1.68E-09 | 3.07E-05   | 0.699 | 0.845 |
| FRZB     | 4 | -0.4040341 | 7.52E-08 | 0.00137191 | 0.103 | 0.336 |
| PRELP    | 4 | -0.4067487 | 8.79E-11 | 1.60E-06   | 0.891 | 0.986 |
| UGP2     | 4 | -0.4171483 | 1.25E-09 | 2.29E-05   | 0.59  | 0.8   |
| DNM3OS   | 4 | -0.4208941 | 4.94E-08 | 0.00090136 | 0.462 | 0.686 |
| RBP4     | 4 | -0.4274822 | 2.32E-06 | 0.04232588 | 0.654 | 0.841 |
| B2M      | 4 | -0.4284967 | 3.69E-12 | 6.74E-08   | 0.987 | 0.995 |
| ID4      | 4 | -0.4376682 | 2.01E-07 | 0.00367505 | 0.494 | 0.705 |
| SOX9     | 4 | -0.4389878 | 1.19E-08 | 0.00021717 | 0.654 | 0.809 |
| FXD6     | 4 | -0.4393885 | 9.80E-12 | 1.79E-07   | 0.782 | 0.941 |
| S100A1   | 4 | -0.4432281 | 5.25E-14 | 9.58E-10   | 0.981 | 1     |
| PNRC1    | 4 | -0.4463679 | 2.43E-13 | 4.43E-09   | 0.923 | 0.977 |

|         |   |            |          |            |       |       |
|---------|---|------------|----------|------------|-------|-------|
| MIA     | 4 | -0.4526779 | 2.80E-12 | 5.11E-08   | 0.962 | 0.995 |
| FTL     | 4 | -0.4576785 | 2.67E-21 | 4.87E-17   | 1     | 1     |
| ITM2C   | 4 | -0.4650333 | 2.16E-09 | 3.93E-05   | 0.513 | 0.764 |
| PAM     | 4 | -0.4681133 | 6.62E-14 | 1.21E-09   | 0.647 | 0.864 |
| WWP2    | 4 | -0.4745388 | 3.99E-10 | 7.29E-06   | 0.494 | 0.723 |
| FBXO2   | 4 | -0.4774662 | 1.47E-12 | 2.68E-08   | 0.526 | 0.805 |
| SNAI2   | 4 | -0.4855078 | 2.08E-06 | 0.03796247 | 0.564 | 0.718 |
| CAPS    | 4 | -0.4860942 | 1.56E-07 | 0.00284717 | 0.583 | 0.732 |
| BAMBI   | 4 | -0.4871889 | 8.00E-10 | 1.46E-05   | 0.506 | 0.768 |
| NGFRAP1 | 4 | -0.4900126 | 4.10E-15 | 7.49E-11   | 0.692 | 0.932 |
| DCN     | 4 | -0.4933819 | 5.81E-15 | 1.06E-10   | 1     | 1     |
| PPP1R3C | 4 | -0.5133106 | 3.32E-11 | 6.07E-07   | 0.365 | 0.659 |
| ID1     | 4 | -0.5218385 | 7.66E-10 | 1.40E-05   | 0.647 | 0.886 |
| CRYAB   | 4 | -0.5278266 | 2.58E-10 | 4.72E-06   | 0.744 | 0.895 |
| CLEC3A  | 4 | -0.5350928 | 4.13E-08 | 0.00075302 | 0.167 | 0.409 |
| FOS     | 4 | -0.5435317 | 6.71E-08 | 0.00122453 | 0.372 | 0.595 |
| COL11A1 | 4 | -0.5624213 | 6.25E-09 | 0.00011405 | 0.821 | 0.945 |
| CFD     | 4 | -0.5679109 | 5.94E-08 | 0.00108339 | 0.083 | 0.314 |
| IGFBP6  | 4 | -0.5745789 | 2.32E-08 | 0.00042346 | 0.481 | 0.673 |
| COL2A1  | 4 | -0.5908466 | 1.78E-10 | 3.24E-06   | 0.647 | 0.895 |
| IGF2    | 4 | -0.5918955 | 8.95E-08 | 0.00163357 | 0.128 | 0.359 |
| PLAC9   | 4 | -0.5938373 | 6.40E-15 | 1.17E-10   | 0.744 | 0.95  |
| IFI6    | 4 | -0.6058849 | 5.41E-07 | 0.00987955 | 0.333 | 0.545 |
| COL9A2  | 4 | -0.6260807 | 3.34E-16 | 6.09E-12   | 0.314 | 0.691 |
| TSC22D1 | 4 | -0.6672191 | 3.90E-09 | 7.11E-05   | 0.455 | 0.673 |
| C2orf40 | 4 | -0.6728229 | 1.23E-15 | 2.24E-11   | 0.974 | 1     |
| OGN     | 4 | -0.6990433 | 2.41E-17 | 4.40E-13   | 0.917 | 1     |
| CHI3L1  | 4 | -0.7141984 | 1.18E-12 | 2.15E-08   | 0.872 | 0.977 |
| CHI3L2  | 4 | -0.7165805 | 3.65E-19 | 6.66E-15   | 0.577 | 0.914 |
| FGFBP2  | 4 | -0.7345936 | 2.58E-13 | 4.71E-09   | 0.814 | 0.977 |
| S100B   | 4 | -0.7348    | 7.40E-12 | 1.35E-07   | 0.635 | 0.818 |
| NOVA1   | 4 | -0.7826099 | 4.42E-17 | 8.07E-13   | 0.667 | 0.918 |
| CP      | 4 | -0.7848672 | 7.82E-16 | 1.43E-11   | 0.487 | 0.795 |
| CCDC80  | 4 | -0.8014993 | 3.03E-23 | 5.53E-19   | 0.878 | 0.986 |
| CTSD    | 4 | -0.8184881 | 1.97E-16 | 3.59E-12   | 0.897 | 0.995 |
| COL11A2 | 4 | -0.8227311 | 5.74E-23 | 1.05E-18   | 0.34  | 0.777 |
| SCRG1   | 4 | -0.8291632 | 3.04E-19 | 5.55E-15   | 0.987 | 1     |
| COL9A3  | 4 | -0.8818169 | 7.19E-19 | 1.31E-14   | 0.5   | 0.864 |
| C2orf82 | 4 | -0.9023762 | 8.51E-09 | 0.00015531 | 0.885 | 0.955 |

|              |                |                  |              |                  |              |              |
|--------------|----------------|------------------|--------------|------------------|--------------|--------------|
| LECT1        | 4              | -0.9889699       | 5.30E-27     | 9.67E-23         | 0.641        | 0.968        |
| EPYC         | 4              | -1.0028102       | 2.69E-23     | 4.91E-19         | 0.224        | 0.718        |
| ACAN         | 4              | -1.0353047       | 4.47E-31     | 8.15E-27         | 0.885        | 0.991        |
| PLA2G2A      | 4              | -1.0970194       | 4.80E-16     | 8.76E-12         | 0.462        | 0.841        |
| SLPI         | 4              | -1.7701439       | 6.37E-29     | 1.16E-24         | 0.821        | 0.991        |
| <b>gene</b>  | <b>cluster</b> | <b>avg_logFC</b> | <b>p_val</b> | <b>p_val_adj</b> | <b>pct.1</b> | <b>pct.2</b> |
| SPP1         | 5              | 1.331687         | 1.29E-12     | 2.35E-08         | 0.907        | 0.743        |
| HMGA1        | 5              | 0.97106643       | 2.04E-30     | 3.72E-26         | 0.79         | 0.289        |
| MT2A         | 5              | 0.87360808       | 2.62E-14     | 4.77E-10         | 1            | 1            |
| CD55         | 5              | 0.80606444       | 5.54E-25     | 1.01E-20         | 0.917        | 0.587        |
| TM4SF1       | 5              | 0.77987905       | 1.41E-17     | 2.57E-13         | 0.746        | 0.39         |
| TIMP3        | 5              | 0.75302584       | 2.02E-13     | 3.68E-09         | 0.82         | 0.532        |
| UPP1         | 5              | 0.64810147       | 3.40E-18     | 6.20E-14         | 0.834        | 0.472        |
| CTSL         | 5              | 0.63919024       | 5.57E-15     | 1.02E-10         | 0.868        | 0.628        |
| SMOX         | 5              | 0.55229184       | 1.94E-11     | 3.54E-07         | 0.571        | 0.307        |
| IGFBP3       | 5              | 0.52324508       | 1.15E-08     | 0.00020965       | 0.61         | 0.344        |
| RGCC         | 5              | 0.52224366       | 1.77E-10     | 3.22E-06         | 0.917        | 0.729        |
| C11orf96     | 5              | 0.51227646       | 4.13E-09     | 7.53E-05         | 0.551        | 0.294        |
| EIF1         | 5              | 0.50948054       | 1.89E-30     | 3.45E-26         | 1            | 1            |
| SOD2         | 5              | 0.50328541       | 5.30E-11     | 9.68E-07         | 1            | 0.991        |
| SNHG12       | 5              | 0.48398638       | 3.66E-14     | 6.68E-10         | 0.737        | 0.427        |
| BZW1         | 5              | 0.45889954       | 7.48E-12     | 1.36E-07         | 0.878        | 0.628        |
| ZFAS1        | 5              | 0.4473573        | 1.77E-16     | 3.23E-12         | 1            | 0.991        |
| FAP          | 5              | 0.44061782       | 5.36E-14     | 9.78E-10         | 0.595        | 0.257        |
| TMSB10       | 5              | 0.43712357       | 2.98E-08     | 0.0005432        | 1            | 0.968        |
| GYPC         | 5              | 0.41120821       | 9.29E-12     | 1.70E-07         | 0.639        | 0.344        |
| FNIP2        | 5              | 0.39248603       | 9.40E-09     | 0.00017152       | 0.483        | 0.243        |
| EPB41L4A-AS1 | 5              | 0.39163486       | 4.81E-13     | 8.77E-09         | 0.966        | 0.766        |
| GSTO1        | 5              | 0.38934895       | 2.12E-09     | 3.87E-05         | 0.829        | 0.628        |
| PDLIM4       | 5              | 0.38149604       | 3.76E-09     | 6.86E-05         | 0.907        | 0.761        |
| TGM2         | 5              | 0.37922274       | 7.59E-10     | 1.39E-05         | 0.395        | 0.147        |
| TAGLN2       | 5              | 0.37778596       | 4.50E-08     | 0.00082126       | 0.761        | 0.569        |
| S100A10      | 5              | 0.37222736       | 9.58E-09     | 0.00017487       | 1            | 0.986        |
| PRDX6        | 5              | 0.35859539       | 3.91E-11     | 7.13E-07         | 0.907        | 0.752        |
| ADSS         | 5              | 0.3503889        | 2.13E-08     | 0.00038886       | 0.717        | 0.491        |
| TREM1        | 5              | 0.34771261       | 7.82E-07     | 0.01426417       | 0.546        | 0.33         |
| VIMP         | 5              | 0.34424435       | 7.12E-10     | 1.30E-05         | 0.893        | 0.72         |
| PSMA7        | 5              | 0.34106995       | 2.45E-09     | 4.46E-05         | 0.917        | 0.729        |
| PMP22        | 5              | 0.30893922       | 3.29E-07     | 0.00600872       | 0.932        | 0.826        |

|               |   |            |          |            |       |       |
|---------------|---|------------|----------|------------|-------|-------|
| SH3GLB1       | 5 | 0.30152544 | 2.46E-08 | 0.00044924 | 0.795 | 0.601 |
| RHOD          | 5 | 0.29933478 | 8.18E-08 | 0.00149277 | 0.566 | 0.321 |
| SYF2          | 5 | 0.29390875 | 1.75E-07 | 0.00319398 | 0.912 | 0.766 |
| AC090498.1    | 5 | 0.29369019 | 7.54E-17 | 1.38E-12   | 1     | 1     |
| SH3BGRL3      | 5 | 0.28902425 | 7.15E-09 | 0.0001304  | 1     | 0.982 |
| GPX4          | 5 | 0.28613883 | 4.60E-08 | 0.00083866 | 0.99  | 0.982 |
| LRRFIP1       | 5 | 0.27761106 | 9.85E-07 | 0.01797795 | 0.42  | 0.216 |
| HDAC2         | 5 | 0.27338554 | 6.47E-07 | 0.01180505 | 0.541 | 0.33  |
| HINT1         | 5 | 0.26712089 | 9.59E-09 | 0.00017494 | 0.961 | 0.959 |
| MIF           | 5 | 0.26375438 | 6.72E-13 | 1.23E-08   | 1     | 1     |
| TATDN1        | 5 | 0.25938185 | 2.42E-06 | 0.04411865 | 0.62  | 0.44  |
| RAC1          | 5 | 0.25838609 | 3.07E-07 | 0.00559397 | 0.971 | 0.876 |
| NBEAL1        | 5 | 0.253388   | 1.23E-08 | 0.00022383 | 1     | 0.977 |
| SGCB          | 5 | -0.2559976 | 1.69E-06 | 0.03086427 | 0.268 | 0.482 |
| TCEA3         | 5 | -0.262302  | 1.06E-09 | 1.93E-05   | 0.146 | 0.408 |
| TSPAN4        | 5 | -0.2645159 | 4.79E-07 | 0.00873185 | 0.288 | 0.518 |
| PSAP          | 5 | -0.2652475 | 1.71E-07 | 0.00311227 | 0.844 | 0.94  |
| FKBP10        | 5 | -0.2673047 | 2.40E-06 | 0.04382472 | 0.293 | 0.486 |
| FTL           | 5 | -0.2709647 | 8.66E-15 | 1.58E-10   | 1     | 1     |
| FCGRT         | 5 | -0.2724851 | 2.74E-06 | 0.04992408 | 0.454 | 0.642 |
| ENAH          | 5 | -0.2743463 | 1.31E-07 | 0.00238647 | 0.088 | 0.28  |
| DUT           | 5 | -0.2757718 | 3.85E-07 | 0.00702395 | 0.459 | 0.683 |
| NDUFA1        | 5 | -0.2773306 | 1.67E-07 | 0.00305238 | 0.771 | 0.872 |
| CALD1         | 5 | -0.2790924 | 5.36E-08 | 0.00097757 | 0.439 | 0.679 |
| SLC26A2       | 5 | -0.2794415 | 1.14E-07 | 0.00208642 | 0.073 | 0.266 |
| WFDC2         | 5 | -0.2829659 | 6.30E-11 | 1.15E-06   | 0.029 | 0.257 |
| FGFRL1        | 5 | -0.2838761 | 1.61E-08 | 0.00029384 | 0.141 | 0.381 |
| C4orf3        | 5 | -0.2850996 | 1.28E-09 | 2.34E-05   | 0.985 | 1     |
| RNASET2       | 5 | -0.2860951 | 7.12E-08 | 0.00129828 | 0.156 | 0.376 |
| H3F3A         | 5 | -0.287205  | 2.70E-07 | 0.00491828 | 0.893 | 0.954 |
| TCF4          | 5 | -0.2881164 | 2.80E-10 | 5.11E-06   | 0.098 | 0.353 |
| P4HA1         | 5 | -0.2886026 | 1.59E-06 | 0.02903372 | 0.537 | 0.702 |
| TMED2         | 5 | -0.2892241 | 3.16E-07 | 0.00576901 | 0.712 | 0.807 |
| GAS6          | 5 | -0.2917943 | 5.11E-08 | 0.00093282 | 0.127 | 0.349 |
| PABPC1        | 5 | -0.2921166 | 3.55E-07 | 0.00647808 | 0.722 | 0.862 |
| CCDC151       | 5 | -0.2932525 | 1.91E-06 | 0.03479213 | 0.346 | 0.555 |
| RP11-983P16.4 | 5 | -0.2944052 | 3.68E-09 | 6.71E-05   | 0.195 | 0.463 |
| SUMO1         | 5 | -0.2981705 | 1.34E-08 | 0.00024401 | 0.59  | 0.752 |
| EEF2          | 5 | -0.2990847 | 1.21E-09 | 2.21E-05   | 0.985 | 1     |

|         |   |            |          |            |       |       |
|---------|---|------------|----------|------------|-------|-------|
| MRPL33  | 5 | -0.3035251 | 1.25E-06 | 0.02289863 | 0.595 | 0.78  |
| TPI1    | 5 | -0.3036688 | 8.36E-08 | 0.00152491 | 0.98  | 0.995 |
| CD59    | 5 | -0.3047873 | 2.56E-07 | 0.00467896 | 0.917 | 0.977 |
| TCTN1   | 5 | -0.3062397 | 2.66E-10 | 4.86E-06   | 0.088 | 0.335 |
| PAPSS2  | 5 | -0.3062397 | 1.20E-06 | 0.02190333 | 0.473 | 0.679 |
| TRPS1   | 5 | -0.3079864 | 1.49E-07 | 0.00272792 | 0.205 | 0.44  |
| RCN2    | 5 | -0.3091461 | 1.28E-06 | 0.02336653 | 0.459 | 0.642 |
| BNIP3   | 5 | -0.3092428 | 2.27E-07 | 0.0041358  | 1     | 0.995 |
| STK26   | 5 | -0.309513  | 1.30E-06 | 0.02366652 | 0.302 | 0.509 |
| MIA     | 5 | -0.3114683 | 1.36E-08 | 0.00024815 | 0.961 | 0.991 |
| ATPIF1  | 5 | -0.3121719 | 3.24E-09 | 5.91E-05   | 0.444 | 0.688 |
| CRIP1   | 5 | -0.315591  | 5.08E-08 | 0.00092607 | 0.2   | 0.436 |
| PNISR   | 5 | -0.3159572 | 5.36E-07 | 0.00977823 | 0.502 | 0.683 |
| SNRPN   | 5 | -0.3165415 | 3.79E-08 | 0.00069225 | 0.644 | 0.826 |
| CHID1   | 5 | -0.316641  | 2.79E-08 | 0.00050891 | 0.346 | 0.587 |
| COL5A2  | 5 | -0.3198825 | 1.92E-07 | 0.00350284 | 0.151 | 0.367 |
| PEBP1   | 5 | -0.3201602 | 2.03E-07 | 0.00371219 | 0.6   | 0.748 |
| SRP9    | 5 | -0.323523  | 3.36E-09 | 6.13E-05   | 0.62  | 0.803 |
| LRPAP1  | 5 | -0.3275862 | 1.91E-06 | 0.03493722 | 0.41  | 0.583 |
| DNM3OS  | 5 | -0.3284276 | 1.09E-10 | 1.99E-06   | 0.044 | 0.275 |
| LAGE3   | 5 | -0.3287126 | 8.86E-08 | 0.00161732 | 0.351 | 0.583 |
| PCOLCE2 | 5 | -0.3291503 | 1.90E-11 | 3.47E-07   | 0.932 | 0.982 |
| SRSF5   | 5 | -0.3295498 | 9.75E-08 | 0.00177977 | 0.449 | 0.638 |
| TSPAN3  | 5 | -0.3310766 | 5.26E-07 | 0.00959048 | 0.366 | 0.569 |
| IFITM10 | 5 | -0.3321104 | 2.17E-11 | 3.96E-07   | 0.068 | 0.33  |
| HNRNPA1 | 5 | -0.3353815 | 7.11E-11 | 1.30E-06   | 0.976 | 0.986 |
| HIF1A   | 5 | -0.3354451 | 2.87E-07 | 0.00523539 | 0.81  | 0.899 |
| EEF1A1  | 5 | -0.3357451 | 3.45E-20 | 6.30E-16   | 1     | 1     |
| CD320   | 5 | -0.3360927 | 4.34E-09 | 7.91E-05   | 0.288 | 0.573 |
| FAM162A | 5 | -0.33692   | 1.03E-08 | 0.00018772 | 0.941 | 0.982 |
| UGP2    | 5 | -0.3387581 | 6.90E-07 | 0.01259797 | 0.561 | 0.693 |
| ISLR    | 5 | -0.3396037 | 1.10E-12 | 2.01E-08   | 0.083 | 0.376 |
| INSIG2  | 5 | -0.3417404 | 1.70E-06 | 0.03098038 | 0.541 | 0.711 |
| IGFBP7  | 5 | -0.3424463 | 1.98E-07 | 0.00361804 | 0.78  | 0.917 |
| SAT1    | 5 | -0.3445626 | 5.65E-08 | 0.00103161 | 0.941 | 0.991 |
| HMG2    | 5 | -0.3477183 | 2.60E-10 | 4.75E-06   | 0.795 | 0.945 |
| SOX9    | 5 | -0.3523134 | 8.18E-07 | 0.01492016 | 0.576 | 0.739 |
| AEBP1   | 5 | -0.3534272 | 8.34E-07 | 0.0152251  | 0.727 | 0.812 |
| POLR2L  | 5 | -0.3545162 | 7.53E-08 | 0.00137371 | 0.722 | 0.872 |



|          |   |            |          |            |       |       |
|----------|---|------------|----------|------------|-------|-------|
| EID1     | 5 | -0.3555075 | 1.71E-11 | 3.13E-07   | 0.834 | 0.959 |
| N4BP2L2  | 5 | -0.355644  | 3.59E-08 | 0.00065503 | 0.668 | 0.812 |
| DDR2     | 5 | -0.3596147 | 5.27E-08 | 0.00096245 | 0.244 | 0.482 |
| PNRC1    | 5 | -0.360347  | 4.78E-08 | 0.00087247 | 0.927 | 0.977 |
| ITM2B    | 5 | -0.3619062 | 1.03E-08 | 0.00018856 | 0.971 | 0.991 |
| SEPP1    | 5 | -0.3639807 | 8.88E-09 | 0.00016201 | 0.205 | 0.468 |
| SPON2    | 5 | -0.3644187 | 6.42E-11 | 1.17E-06   | 0.078 | 0.33  |
| IFITM3   | 5 | -0.3649375 | 1.48E-09 | 2.70E-05   | 0.829 | 0.95  |
| DYNLL1   | 5 | -0.3683327 | 4.99E-10 | 9.10E-06   | 0.78  | 0.899 |
| MT-ND4   | 5 | -0.3688776 | 1.10E-07 | 0.00201516 | 0.917 | 0.972 |
| PDIA6    | 5 | -0.3690054 | 2.91E-09 | 5.32E-05   | 0.42  | 0.651 |
| CTSF     | 5 | -0.371379  | 3.82E-12 | 6.97E-08   | 0.127 | 0.427 |
| BHLHE41  | 5 | -0.3723105 | 7.56E-11 | 1.38E-06   | 0.102 | 0.367 |
| IFITM1   | 5 | -0.3742064 | 5.16E-09 | 9.41E-05   | 0.283 | 0.555 |
| SDC2     | 5 | -0.3746961 | 5.36E-09 | 9.78E-05   | 0.683 | 0.862 |
| S100A4   | 5 | -0.3768679 | 1.30E-06 | 0.02363326 | 0.585 | 0.743 |
| GRN      | 5 | -0.3791207 | 1.32E-12 | 2.41E-08   | 0.098 | 0.394 |
| NME4     | 5 | -0.3817695 | 5.38E-13 | 9.82E-09   | 0.176 | 0.5   |
| CDO1     | 5 | -0.3832007 | 1.34E-12 | 2.45E-08   | 0.078 | 0.362 |
| TTC3     | 5 | -0.387647  | 1.01E-10 | 1.84E-06   | 0.42  | 0.697 |
| ANGPTL2  | 5 | -0.3881512 | 2.93E-09 | 5.34E-05   | 0.341 | 0.615 |
| MALAT1   | 5 | -0.3881966 | 5.27E-14 | 9.61E-10   | 1     | 1     |
| IFI6     | 5 | -0.3888926 | 5.20E-07 | 0.00949468 | 0.215 | 0.436 |
| SERF2    | 5 | -0.3914069 | 3.70E-16 | 6.75E-12   | 1     | 1     |
| B2M      | 5 | -0.3957998 | 6.02E-13 | 1.10E-08   | 0.976 | 1     |
| PDIA3    | 5 | -0.3965424 | 2.88E-08 | 0.00052625 | 0.376 | 0.592 |
| P4HB     | 5 | -0.3980472 | 1.88E-10 | 3.43E-06   | 0.605 | 0.789 |
| CNPY2    | 5 | -0.3994098 | 4.75E-11 | 8.66E-07   | 0.571 | 0.775 |
| SRGN     | 5 | -0.4012809 | 3.83E-10 | 6.98E-06   | 0.19  | 0.463 |
| IER2     | 5 | -0.4021507 | 1.61E-07 | 0.00293444 | 0.166 | 0.381 |
| NDUFA4L2 | 5 | -0.404242  | 9.46E-27 | 1.73E-22   | 1     | 1     |
| SMOC2    | 5 | -0.4046046 | 3.87E-10 | 7.07E-06   | 0.068 | 0.303 |
| TPD52    | 5 | -0.4077772 | 2.94E-11 | 5.37E-07   | 0.698 | 0.853 |
| CA9      | 5 | -0.4096577 | 6.92E-08 | 0.00126224 | 0.346 | 0.578 |
| PKM      | 5 | -0.41467   | 8.77E-11 | 1.60E-06   | 0.815 | 0.927 |
| SCRG1    | 5 | -0.414917  | 2.33E-08 | 0.00042498 | 0.985 | 1     |
| ID2      | 5 | -0.4185487 | 5.72E-09 | 0.00010432 | 0.293 | 0.546 |
| MT-ND3   | 5 | -0.4205846 | 8.36E-10 | 1.52E-05   | 0.376 | 0.647 |
| SDF4     | 5 | -0.4226723 | 1.26E-11 | 2.30E-07   | 0.454 | 0.697 |

|          |   |            |          |            |       |       |
|----------|---|------------|----------|------------|-------|-------|
| ID4      | 5 | -0.4265304 | 2.81E-08 | 0.00051329 | 0.293 | 0.541 |
| LY6E     | 5 | -0.4283867 | 3.37E-14 | 6.14E-10   | 0.307 | 0.638 |
| CHRD2    | 5 | -0.4305415 | 5.73E-09 | 0.00010453 | 0.151 | 0.394 |
| C7orf73  | 5 | -0.4321727 | 5.20E-08 | 0.00094842 | 0.6   | 0.748 |
| NAA38    | 5 | -0.4376053 | 1.60E-13 | 2.92E-09   | 0.459 | 0.757 |
| ATRAID   | 5 | -0.4397199 | 2.25E-15 | 4.11E-11   | 0.737 | 0.945 |
| PAM      | 5 | -0.4400669 | 2.31E-10 | 4.22E-06   | 0.546 | 0.72  |
| PLD3     | 5 | -0.4480975 | 6.11E-12 | 1.11E-07   | 0.395 | 0.67  |
| DCN      | 5 | -0.4504172 | 7.77E-18 | 1.42E-13   | 1     | 1     |
| C1S      | 5 | -0.4509652 | 1.32E-12 | 2.40E-08   | 0.454 | 0.748 |
| MT-CO1   | 5 | -0.4626992 | 1.36E-08 | 0.00024862 | 0.902 | 0.963 |
| PPP1R3C  | 5 | -0.4665823 | 3.15E-10 | 5.74E-06   | 0.263 | 0.528 |
| PRDX4    | 5 | -0.4670861 | 8.16E-12 | 1.49E-07   | 0.595 | 0.803 |
| FAM46A   | 5 | -0.4719248 | 4.23E-13 | 7.71E-09   | 0.376 | 0.711 |
| LCN2     | 5 | -0.4735452 | 6.04E-08 | 0.00110253 | 0.332 | 0.564 |
| MT-ND2   | 5 | -0.4752222 | 3.93E-11 | 7.18E-07   | 0.307 | 0.619 |
| MT-CYB   | 5 | -0.4857082 | 5.26E-08 | 0.00096    | 0.483 | 0.656 |
| EGR1     | 5 | -0.4858743 | 4.00E-09 | 7.30E-05   | 0.156 | 0.408 |
| CHI3L1   | 5 | -0.4983437 | 6.49E-09 | 0.0001184  | 0.98  | 1     |
| HTRA1    | 5 | -0.5116444 | 1.75E-14 | 3.20E-10   | 0.551 | 0.844 |
| MT-CO3   | 5 | -0.5165072 | 1.68E-10 | 3.06E-06   | 0.8   | 0.922 |
| CFD      | 5 | -0.517373  | 8.15E-09 | 0.00014871 | 0.112 | 0.349 |
| GOLIM4   | 5 | -0.5220635 | 1.08E-06 | 0.01972372 | 0.244 | 0.436 |
| C10orf10 | 5 | -0.5297859 | 9.81E-09 | 0.00017891 | 0.39  | 0.633 |
| COL11A2  | 5 | -0.5317961 | 1.90E-14 | 3.46E-10   | 0.415 | 0.734 |
| COL9A2   | 5 | -0.5363519 | 5.96E-17 | 1.09E-12   | 0.195 | 0.578 |
| CYTL1    | 5 | -0.5398545 | 7.93E-10 | 1.45E-05   | 0.078 | 0.312 |
| MT-ND1   | 5 | -0.5475174 | 3.63E-13 | 6.62E-09   | 0.185 | 0.518 |
| CST3     | 5 | -0.5520099 | 2.57E-22 | 4.70E-18   | 0.985 | 1     |
| FMOD     | 5 | -0.5596282 | 4.20E-22 | 7.66E-18   | 0.873 | 0.977 |
| LSP1     | 5 | -0.5629852 | 6.90E-18 | 1.26E-13   | 0.093 | 0.459 |
| VKORC1   | 5 | -0.5664216 | 3.12E-20 | 5.70E-16   | 0.912 | 0.986 |
| MT-ATP6  | 5 | -0.5682925 | 2.68E-10 | 4.89E-06   | 0.644 | 0.807 |
| DUSP1    | 5 | -0.5721713 | 3.44E-11 | 6.28E-07   | 0.283 | 0.546 |
| SNAI2    | 5 | -0.5738425 | 2.69E-11 | 4.91E-07   | 0.18  | 0.468 |
| BTG1     | 5 | -0.5787749 | 2.23E-15 | 4.06E-11   | 0.985 | 0.995 |
| CD99     | 5 | -0.5796519 | 1.29E-20 | 2.36E-16   | 0.81  | 0.972 |
| NGFRAP1  | 5 | -0.5875452 | 3.16E-18 | 5.77E-14   | 0.659 | 0.853 |
| FBXO2    | 5 | -0.5997371 | 2.32E-22 | 4.23E-18   | 0.478 | 0.849 |

| MDFI    | 5       | -0.6044125 | 4.96E-15 | 9.05E-11  | 0.239 | 0.569 |
|---------|---------|------------|----------|-----------|-------|-------|
| RHOBTB3 | 5       | -0.6096832 | 7.00E-19 | 1.28E-14  | 0.278 | 0.683 |
| OGN     | 5       | -0.6401547 | 6.05E-13 | 1.10E-08  | 0.722 | 0.908 |
| NOVA1   | 5       | -0.6532986 | 4.91E-14 | 8.96E-10  | 0.878 | 0.945 |
| FOS     | 5       | -0.6608187 | 3.96E-15 | 7.23E-11  | 0.317 | 0.661 |
| ITM2C   | 5       | -0.6651848 | 1.96E-19 | 3.57E-15  | 0.229 | 0.619 |
| BAMBI   | 5       | -0.6785672 | 2.16E-19 | 3.93E-15  | 0.312 | 0.725 |
| PRELP   | 5       | -0.7021288 | 6.05E-22 | 1.10E-17  | 0.917 | 1     |
| FXYP6   | 5       | -0.7174621 | 6.60E-26 | 1.20E-21  | 0.576 | 0.885 |
| MT1H    | 5       | -0.7198619 | 1.54E-07 | 0.0028116 | 0.654 | 0.789 |
| CHI3L2  | 5       | -0.7262611 | 7.21E-19 | 1.32E-14  | 0.756 | 0.968 |
| RBP4    | 5       | -0.7301543 | 1.01E-14 | 1.84E-10  | 0.585 | 0.853 |
| CP      | 5       | -0.7505233 | 7.82E-10 | 1.43E-05  | 0.556 | 0.725 |
| MT-CO2  | 5       | -0.7600291 | 3.04E-13 | 5.55E-09  | 0.859 | 0.936 |
| MT1G    | 5       | -0.7615072 | 6.28E-15 | 1.15E-10  | 0.932 | 0.977 |
| LECT1   | 5       | -0.7646652 | 3.17E-22 | 5.78E-18  | 0.722 | 0.954 |
| JUNB    | 5       | -0.7905392 | 4.57E-14 | 8.35E-10  | 0.405 | 0.683 |
| TSC22D1 | 5       | -0.7973383 | 1.62E-17 | 2.95E-13  | 0.532 | 0.812 |
| WWP2    | 5       | -0.799858  | 8.61E-25 | 1.57E-20  | 0.527 | 0.858 |
| COL9A3  | 5       | -0.8076997 | 7.58E-20 | 1.38E-15  | 0.488 | 0.826 |
| C2orf40 | 5       | -0.8214116 | 9.67E-25 | 1.77E-20  | 0.98  | 1     |
| MT1F    | 5       | -0.8464629 | 4.19E-20 | 7.64E-16  | 0.824 | 0.959 |
| ID1     | 5       | -0.8602701 | 6.12E-13 | 1.12E-08  | 0.22  | 0.514 |
| CCDC80  | 5       | -0.8866482 | 1.37E-28 | 2.51E-24  | 0.946 | 0.995 |
| ACAN    | 5       | -0.9202126 | 4.16E-36 | 7.58E-32  | 0.917 | 0.995 |
| ID3     | 5       | -0.9260421 | 2.33E-14 | 4.25E-10  | 0.146 | 0.468 |
| S100B   | 5       | -0.9300581 | 9.53E-29 | 1.74E-24  | 0.663 | 0.917 |
| COL2A1  | 5       | -0.9330296 | 2.93E-22 | 5.34E-18  | 0.317 | 0.725 |
| COL11A1 | 5       | -0.9412792 | 1.19E-26 | 2.17E-22  | 0.556 | 0.881 |
| EPYC    | 5       | -0.944896  | 3.19E-28 | 5.81E-24  | 0.078 | 0.573 |
| PLA2G2A | 5       | -0.9659868 | 5.58E-18 | 1.02E-13  | 0.766 | 0.927 |
| PLAC9   | 5       | -1.0423924 | 1.32E-28 | 2.40E-24  | 0.488 | 0.867 |
| CLEC3A  | 5       | -1.1240495 | 1.90E-26 | 3.47E-22  | 0.215 | 0.693 |
| CTSD    | 5       | -1.2496984 | 1.70E-32 | 3.10E-28  | 0.776 | 0.986 |
| SLPI    | 5       | -1.3748608 | 7.35E-21 | 1.34E-16  | 0.976 | 0.995 |
| TMSB4X  | 6       | 0.87683199 | 1.12E-15 | 2.04E-11  | 0.903 | 0.712 |
| gene    | cluster | avg_logFC  | p_val    | p_val_adj | pct.1 | pct.2 |
| MT2A    | 6       | 0.76158514 | 2.78E-31 | 5.07E-27  | 1     | 1     |
| CD55    | 6       | 0.66638106 | 1.05E-23 | 1.91E-19  | 0.925 | 0.712 |

|          |   |            |          |            |       |       |
|----------|---|------------|----------|------------|-------|-------|
| TM4SF1   | 6 | 0.64118796 | 3.65E-19 | 6.66E-15   | 0.915 | 0.737 |
| LGALS1   | 6 | 0.54421922 | 6.15E-16 | 1.12E-11   | 0.994 | 0.979 |
| TIMP3    | 6 | 0.51060876 | 7.10E-07 | 0.01294673 | 0.682 | 0.523 |
| TMSB10   | 6 | 0.50062258 | 4.88E-19 | 8.90E-15   | 1     | 0.996 |
| HMGA1    | 6 | 0.43291793 | 9.51E-11 | 1.74E-06   | 0.89  | 0.7   |
| GSTO1    | 6 | 0.41404436 | 1.66E-13 | 3.03E-09   | 0.868 | 0.708 |
| AKAP12   | 6 | 0.40620344 | 2.87E-13 | 5.24E-09   | 0.406 | 0.136 |
| NRP2     | 6 | 0.40325056 | 1.46E-06 | 0.02656543 | 0.588 | 0.444 |
| C11orf96 | 6 | 0.35366264 | 8.16E-08 | 0.00148958 | 0.676 | 0.461 |
| S100A6   | 6 | 0.33090679 | 2.20E-09 | 4.01E-05   | 1     | 1     |
| FHL2     | 6 | 0.32429125 | 1.99E-08 | 0.00036228 | 0.553 | 0.354 |
| EIF1     | 6 | 0.30178743 | 8.36E-15 | 1.53E-10   | 1     | 1     |
| NBEAL1   | 6 | 0.27675418 | 1.71E-11 | 3.12E-07   | 0.997 | 0.979 |
| LRRFIP1  | 6 | 0.26861671 | 8.54E-07 | 0.01557483 | 0.654 | 0.506 |
| EGLN1    | 6 | -0.2534168 | 1.22E-07 | 0.00223192 | 0.33  | 0.523 |
| ARMCX3   | 6 | -0.2541749 | 3.32E-07 | 0.00605385 | 0.384 | 0.564 |
| NAA38    | 6 | -0.2542295 | 1.93E-07 | 0.00351394 | 0.456 | 0.642 |
| H3F3B    | 6 | -0.2552777 | 1.24E-08 | 0.00022628 | 0.994 | 0.996 |
| LAMP1    | 6 | -0.2556564 | 1.04E-06 | 0.01903838 | 0.314 | 0.498 |
| EEF2     | 6 | -0.2556988 | 1.00E-06 | 0.01832497 | 0.969 | 0.979 |
| SLC39A8  | 6 | -0.2575873 | 2.07E-09 | 3.77E-05   | 0.286 | 0.519 |
| CD320    | 6 | -0.2579887 | 1.71E-07 | 0.00312134 | 0.362 | 0.543 |
| IFI6     | 6 | -0.2596441 | 1.30E-06 | 0.02363617 | 0.211 | 0.383 |
| P4HB     | 6 | -0.2638748 | 5.30E-08 | 0.00096767 | 0.645 | 0.852 |
| FCGRT    | 6 | -0.2650529 | 1.93E-08 | 0.00035249 | 0.412 | 0.617 |
| EEF1A1   | 6 | -0.2669596 | 7.10E-20 | 1.30E-15   | 1     | 1     |
| HNRNPA1  | 6 | -0.2684229 | 7.45E-10 | 1.36E-05   | 0.959 | 0.988 |
| TPD52L1  | 6 | -0.2764994 | 3.80E-08 | 0.00069349 | 0.204 | 0.403 |
| CRIP1    | 6 | -0.2770383 | 4.73E-07 | 0.00862677 | 0.286 | 0.481 |
| CHID1    | 6 | -0.2774288 | 5.31E-09 | 9.69E-05   | 0.374 | 0.593 |
| PNRC1    | 6 | -0.2803465 | 1.35E-07 | 0.0024716  | 0.909 | 0.963 |
| SOX9     | 6 | -0.2826141 | 5.52E-07 | 0.01007777 | 0.604 | 0.774 |
| SAT1     | 6 | -0.2830535 | 3.60E-07 | 0.00657105 | 0.912 | 0.979 |
| ME1      | 6 | -0.2856769 | 9.14E-07 | 0.01667304 | 0.239 | 0.412 |
| DDR2     | 6 | -0.286425  | 7.71E-10 | 1.41E-05   | 0.208 | 0.432 |
| NOL3     | 6 | -0.2900433 | 3.83E-08 | 0.00069802 | 0.358 | 0.56  |
| SDC2     | 6 | -0.2901219 | 6.20E-11 | 1.13E-06   | 0.635 | 0.852 |
| TMEM45A  | 6 | -0.2914628 | 8.56E-08 | 0.00156189 | 0.887 | 0.947 |
| FOXA3    | 6 | -0.2930231 | 3.44E-11 | 6.29E-07   | 0.116 | 0.342 |

|          |   |            |          |            |       |       |
|----------|---|------------|----------|------------|-------|-------|
| PDIA6    | 6 | -0.2960919 | 1.77E-09 | 3.22E-05   | 0.472 | 0.663 |
| SERPING1 | 6 | -0.296229  | 3.53E-07 | 0.00644876 | 0.418 | 0.58  |
| NT5C3A   | 6 | -0.2995111 | 6.78E-07 | 0.01237722 | 0.343 | 0.523 |
| MEF2A    | 6 | -0.3007386 | 4.13E-08 | 0.0007539  | 0.346 | 0.543 |
| LY6E     | 6 | -0.300806  | 1.45E-10 | 2.65E-06   | 0.308 | 0.56  |
| TPD52    | 6 | -0.3016338 | 6.75E-10 | 1.23E-05   | 0.575 | 0.786 |
| HSD17B14 | 6 | -0.3071625 | 2.26E-08 | 0.00041167 | 0.425 | 0.601 |
| FXVD6    | 6 | -0.3074034 | 2.37E-07 | 0.00432837 | 0.651 | 0.778 |
| IGF2     | 6 | -0.3076688 | 3.39E-08 | 0.00061883 | 0.088 | 0.259 |
| PLD3     | 6 | -0.3134417 | 3.40E-07 | 0.0062094  | 0.403 | 0.588 |
| PDIA3    | 6 | -0.3136142 | 2.11E-09 | 3.84E-05   | 0.409 | 0.63  |
| CYTL1    | 6 | -0.3144141 | 4.89E-08 | 0.00089268 | 0.179 | 0.383 |
| PKM      | 6 | -0.3186941 | 2.30E-08 | 0.00041888 | 0.871 | 0.955 |
| PPP1R3C  | 6 | -0.3195568 | 8.26E-09 | 0.00015078 | 0.327 | 0.551 |
| MMP3     | 6 | -0.3206106 | 2.13E-08 | 0.00038933 | 0.774 | 0.881 |
| CTSF     | 6 | -0.3233371 | 5.76E-14 | 1.05E-09   | 0.16  | 0.436 |
| FOS      | 6 | -0.3251518 | 3.01E-07 | 0.00549698 | 0.336 | 0.519 |
| MDFI     | 6 | -0.3255022 | 9.44E-07 | 0.01723245 | 0.286 | 0.453 |
| HMG2     | 6 | -0.3277288 | 2.84E-11 | 5.18E-07   | 0.723 | 0.872 |
| SPON2    | 6 | -0.3306341 | 6.90E-14 | 1.26E-09   | 0.063 | 0.296 |
| IFRD1    | 6 | -0.3307379 | 7.93E-07 | 0.01447146 | 0.572 | 0.695 |
| LUM      | 6 | -0.3312785 | 4.15E-09 | 7.58E-05   | 0.997 | 1     |
| P4HA1    | 6 | -0.3341596 | 1.57E-10 | 2.86E-06   | 0.572 | 0.745 |
| LSP1     | 6 | -0.3451513 | 2.24E-09 | 4.10E-05   | 0.214 | 0.428 |
| EGLN3    | 6 | -0.3454484 | 7.59E-08 | 0.00138502 | 0.343 | 0.547 |
| CNPY2    | 6 | -0.3493123 | 2.08E-12 | 3.80E-08   | 0.456 | 0.7   |
| B2M      | 6 | -0.3502479 | 6.66E-15 | 1.21E-10   | 0.972 | 0.988 |
| SDF4     | 6 | -0.3529161 | 6.79E-12 | 1.24E-07   | 0.465 | 0.675 |
| PRDX4    | 6 | -0.3542342 | 2.24E-10 | 4.09E-06   | 0.597 | 0.794 |
| HTRA1    | 6 | -0.354636  | 4.02E-13 | 7.33E-09   | 0.588 | 0.802 |
| PAM      | 6 | -0.3578212 | 1.07E-14 | 1.95E-10   | 0.481 | 0.741 |
| SLC16A3  | 6 | -0.3578775 | 1.83E-07 | 0.00333669 | 0.579 | 0.737 |
| ADM      | 6 | -0.3581776 | 2.51E-08 | 0.00045784 | 0.673 | 0.848 |
| MALAT1   | 6 | -0.3603078 | 1.75E-15 | 3.19E-11   | 1     | 1     |
| PSAP     | 6 | -0.3622693 | 1.01E-11 | 1.84E-07   | 0.777 | 0.918 |
| FAM162A  | 6 | -0.3661304 | 8.92E-14 | 1.63E-09   | 0.934 | 0.984 |
| HSP90B1  | 6 | -0.3664738 | 1.23E-11 | 2.24E-07   | 0.594 | 0.827 |
| VKORC1   | 6 | -0.3668758 | 2.93E-13 | 5.35E-09   | 0.947 | 0.963 |
| INSIG2   | 6 | -0.3687572 | 9.46E-09 | 0.00017264 | 0.613 | 0.774 |

|          |   |            |          |            |       |       |
|----------|---|------------|----------|------------|-------|-------|
| PGK1     | 6 | -0.3710174 | 2.58E-11 | 4.71E-07   | 0.918 | 0.984 |
| ANGPTL2  | 6 | -0.3713013 | 4.43E-11 | 8.08E-07   | 0.252 | 0.498 |
| CP       | 6 | -0.3721454 | 5.24E-08 | 0.00095549 | 0.522 | 0.695 |
| NDUFA4L2 | 6 | -0.3806962 | 1.37E-30 | 2.50E-26   | 1     | 1     |
| BNIP3    | 6 | -0.382419  | 1.73E-15 | 3.16E-11   | 0.997 | 1     |
| MIA      | 6 | -0.3858578 | 4.38E-15 | 8.00E-11   | 0.95  | 0.988 |
| TMEM59   | 6 | -0.3873455 | 6.04E-15 | 1.10E-10   | 0.956 | 0.992 |
| GSN      | 6 | -0.3942862 | 7.93E-12 | 1.45E-07   | 0.283 | 0.535 |
| VCAN     | 6 | -0.3950307 | 3.23E-13 | 5.90E-09   | 0.176 | 0.453 |
| C1S      | 6 | -0.3963094 | 6.96E-10 | 1.27E-05   | 0.415 | 0.634 |
| AK2      | 6 | -0.4003259 | 1.64E-09 | 3.00E-05   | 0.761 | 0.852 |
| IGFBP6   | 6 | -0.4043313 | 1.18E-09 | 2.15E-05   | 0.484 | 0.704 |
| CAPS     | 6 | -0.4160434 | 7.06E-11 | 1.29E-06   | 0.447 | 0.683 |
| CD99     | 6 | -0.4321093 | 3.87E-15 | 7.06E-11   | 0.789 | 0.93  |
| SERPINA1 | 6 | -0.4400844 | 4.53E-14 | 8.27E-10   | 0.865 | 0.975 |
| ITM2C    | 6 | -0.4406162 | 5.38E-20 | 9.82E-16   | 0.286 | 0.663 |
| SNRPN    | 6 | -0.4422219 | 1.13E-19 | 2.06E-15   | 0.503 | 0.794 |
| DDIT4L   | 6 | -0.4425545 | 1.21E-10 | 2.20E-06   | 0.824 | 0.914 |
| ATRAID   | 6 | -0.4528805 | 4.61E-20 | 8.41E-16   | 0.66  | 0.893 |
| IGFBP7   | 6 | -0.4538654 | 2.21E-14 | 4.03E-10   | 0.701 | 0.914 |
| FBXO2    | 6 | -0.4594482 | 6.09E-16 | 1.11E-11   | 0.418 | 0.691 |
| LRPAP1   | 6 | -0.4620903 | 2.60E-17 | 4.74E-13   | 0.314 | 0.626 |
| CA9      | 6 | -0.464252  | 2.53E-08 | 0.00046105 | 0.525 | 0.691 |
| COL11A2  | 6 | -0.4719308 | 2.38E-13 | 4.33E-09   | 0.299 | 0.551 |
| TSC22D1  | 6 | -0.4778264 | 2.79E-07 | 0.0050965  | 0.66  | 0.765 |
| WWP2     | 6 | -0.4782978 | 5.31E-15 | 9.70E-11   | 0.318 | 0.626 |
| COL11A1  | 6 | -0.4826706 | 1.04E-13 | 1.90E-09   | 0.437 | 0.757 |
| COL9A2   | 6 | -0.4872909 | 5.03E-11 | 9.18E-07   | 0.189 | 0.432 |
| FAM46A   | 6 | -0.4905322 | 1.41E-14 | 2.57E-10   | 0.374 | 0.646 |
| NGFRAP1  | 6 | -0.4910029 | 5.32E-17 | 9.70E-13   | 0.648 | 0.84  |
| ITM2B    | 6 | -0.498778  | 6.75E-20 | 1.23E-15   | 0.94  | 0.992 |
| CLU      | 6 | -0.5113047 | 4.06E-15 | 7.40E-11   | 1     | 1     |
| CCDC85B  | 6 | -0.5217112 | 2.98E-13 | 5.43E-09   | 0.918 | 0.975 |
| LCN2     | 6 | -0.5308935 | 7.17E-08 | 0.00130782 | 0.283 | 0.477 |
| ARRDC3   | 6 | -0.5346439 | 1.78E-12 | 3.24E-08   | 0.531 | 0.741 |
| PCOLCE2  | 6 | -0.5401793 | 2.96E-22 | 5.40E-18   | 0.792 | 0.951 |
| CLEC3A   | 6 | -0.542158  | 9.16E-20 | 1.67E-15   | 0.075 | 0.383 |
| CFD      | 6 | -0.5483732 | 3.64E-13 | 6.64E-09   | 0.091 | 0.329 |
| SCRG1    | 6 | -0.5571383 | 1.37E-14 | 2.50E-10   | 0.953 | 0.992 |

| IGFBP5    | 6       | -0.5930754 | 7.87E-14 | 1.44E-09   | 0.182 | 0.469 |
|-----------|---------|------------|----------|------------|-------|-------|
| GAPDH     | 6       | -0.60482   | 1.65E-22 | 3.00E-18   | 1     | 1     |
| EGR1      | 6       | -0.6054622 | 6.26E-14 | 1.14E-09   | 0.226 | 0.486 |
| MT1F      | 6       | -0.6076368 | 4.51E-08 | 0.00082254 | 0.849 | 0.893 |
| HIF1A     | 6       | -0.6193953 | 5.49E-22 | 1.00E-17   | 0.692 | 0.905 |
| FMOD      | 6       | -0.6199497 | 1.19E-23 | 2.16E-19   | 0.726 | 0.926 |
| OGN       | 6       | -0.655709  | 7.71E-15 | 1.41E-10   | 0.777 | 0.901 |
| CST3      | 6       | -0.6618683 | 4.77E-33 | 8.71E-29   | 0.969 | 1     |
| COL9A3    | 6       | -0.6860025 | 3.09E-13 | 5.64E-09   | 0.403 | 0.634 |
| DCN       | 6       | -0.7154734 | 1.01E-38 | 1.85E-34   | 1     | 1     |
| PLAC9     | 6       | -0.727388  | 1.07E-15 | 1.95E-11   | 0.456 | 0.733 |
| S100B     | 6       | -0.7355213 | 2.51E-20 | 4.58E-16   | 0.506 | 0.741 |
| CHI3L1    | 6       | -0.7480705 | 4.66E-12 | 8.50E-08   | 0.89  | 0.984 |
| EPYC      | 6       | -0.7492392 | 4.84E-26 | 8.82E-22   | 0.079 | 0.453 |
| CHI3L2    | 6       | -0.7852064 | 1.14E-24 | 2.08E-20   | 0.597 | 0.901 |
| C2orf82   | 6       | -0.7998335 | 7.37E-14 | 1.35E-09   | 0.921 | 0.963 |
| FGFBP2    | 6       | -0.801238  | 4.63E-26 | 8.45E-22   | 0.855 | 0.984 |
| C2orf40   | 6       | -0.8017192 | 2.47E-20 | 4.51E-16   | 0.965 | 1     |
| COL2A1    | 6       | -0.8186313 | 5.08E-17 | 9.27E-13   | 0.248 | 0.568 |
| ACAN      | 6       | -0.8674719 | 4.80E-37 | 8.75E-33   | 0.77  | 0.963 |
| RBP4      | 6       | -0.9764932 | 9.05E-24 | 1.65E-19   | 0.497 | 0.798 |
| LECT1     | 6       | -1.0206904 | 4.22E-31 | 7.70E-27   | 0.519 | 0.926 |
| PRELP     | 6       | -1.066544  | 2.49E-46 | 4.54E-42   | 0.777 | 0.988 |
| CCDC80    | 6       | -1.1139139 | 1.09E-43 | 1.99E-39   | 0.698 | 0.971 |
| PLA2G2A   | 6       | -1.2838713 | 6.41E-26 | 1.17E-21   | 0.311 | 0.712 |
| SLPI      | 6       | -1.3055529 | 4.70E-31 | 8.58E-27   | 0.783 | 0.984 |
| CTSD      | 6       | -1.4583018 | 3.06E-36 | 5.59E-32   | 0.783 | 0.979 |
| gene      | cluster | avg_logFC  | p_val    | p_val_adj  | pct.1 | pct.2 |
| MT2A      | 7       | 0.93481962 | 9.32E-20 | 1.70E-15   | 1     | 0.991 |
| TMSB4X    | 7       | 0.80481004 | 3.54E-14 | 6.46E-10   | 0.995 | 1     |
| IGFBP3    | 7       | 0.77611107 | 4.37E-10 | 7.98E-06   | 0.821 | 0.573 |
| LGALS1    | 7       | 0.73070547 | 3.41E-21 | 6.23E-17   | 1     | 1     |
| KIAA0101  | 7       | 0.70016475 | 4.62E-09 | 8.43E-05   | 0.415 | 0.111 |
| PMEPA1    | 7       | 0.69853449 | 1.59E-16 | 2.90E-12   | 0.744 | 0.308 |
| C12orf75  | 7       | 0.671355   | 2.45E-11 | 4.48E-07   | 0.773 | 0.513 |
| PGF       | 7       | 0.65386976 | 1.29E-06 | 0.02355048 | 0.502 | 0.239 |
| PPP1R14B  | 7       | 0.61851733 | 4.49E-09 | 8.18E-05   | 0.778 | 0.59  |
| LINC00152 | 7       | 0.59560364 | 9.60E-12 | 1.75E-07   | 0.778 | 0.453 |
| CCND1     | 7       | 0.55860415 | 4.37E-08 | 0.00079672 | 0.671 | 0.427 |

|             |   |            |          |            |       |       |
|-------------|---|------------|----------|------------|-------|-------|
| SCX         | 7 | 0.5568464  | 1.10E-08 | 0.00020004 | 0.415 | 0.12  |
| MIR4435-2HG | 7 | 0.5433349  | 5.09E-12 | 9.28E-08   | 0.758 | 0.402 |
| TM4SF1      | 7 | 0.53310522 | 2.52E-07 | 0.00459159 | 0.754 | 0.496 |
| TPM1        | 7 | 0.52277641 | 2.87E-09 | 5.24E-05   | 0.865 | 0.718 |
| NRP2        | 7 | 0.51707831 | 3.34E-08 | 0.00060975 | 0.676 | 0.41  |
| PFN1        | 7 | 0.45538488 | 5.65E-07 | 0.01030182 | 0.995 | 0.966 |
| AXL         | 7 | 0.44327089 | 2.35E-06 | 0.04287582 | 0.787 | 0.581 |
| UBE2S       | 7 | 0.42109531 | 1.21E-06 | 0.02206715 | 0.411 | 0.171 |
| GNG11       | 7 | 0.41261812 | 4.25E-07 | 0.007747   | 0.71  | 0.479 |
| SPOCK1      | 7 | 0.39619966 | 1.41E-09 | 2.57E-05   | 0.502 | 0.171 |
| ACTB        | 7 | 0.39458901 | 1.99E-07 | 0.00363891 | 0.99  | 0.957 |
| MT-CO1      | 7 | 0.37736073 | 1.00E-06 | 0.01833154 | 1     | 0.949 |
| STMN1       | 7 | 0.3713883  | 1.65E-07 | 0.00300428 | 0.44  | 0.154 |
| JAG1        | 7 | 0.34303951 | 1.06E-07 | 0.00193919 | 0.478 | 0.179 |
| HINT1       | 7 | 0.33197905 | 9.30E-07 | 0.01696866 | 0.986 | 0.94  |
| MT-ND4      | 7 | 0.33158942 | 8.69E-07 | 0.01585103 | 0.99  | 0.949 |
| FAM89B      | 7 | 0.32327302 | 2.76E-07 | 0.00503635 | 0.473 | 0.188 |
| PLP2        | 7 | 0.31716254 | 1.06E-06 | 0.01940111 | 0.87  | 0.701 |
| ARL4C       | 7 | 0.31414053 | 2.48E-06 | 0.0452978  | 0.338 | 0.103 |
| BIRC5       | 7 | 0.29662508 | 7.48E-08 | 0.00136578 | 0.251 | 0.017 |
| TMSB10      | 7 | 0.29594142 | 6.02E-07 | 0.01097746 | 1     | 1     |
| TK1         | 7 | 0.27786845 | 1.96E-06 | 0.03579048 | 0.29  | 0.068 |
| SMAD9       | 7 | -0.2548167 | 8.96E-07 | 0.01634848 | 0.097 | 0.308 |
| EBF1        | 7 | -0.259267  | 7.56E-07 | 0.0138019  | 0.145 | 0.385 |
| COMMD6      | 7 | -0.2635776 | 1.92E-08 | 0.00034974 | 0.971 | 1     |
| CTSA        | 7 | -0.2664999 | 1.45E-07 | 0.00265179 | 0.222 | 0.504 |
| KAZALD1     | 7 | -0.2735973 | 2.35E-07 | 0.00428877 | 0.193 | 0.453 |
| FAM134B     | 7 | -0.2965429 | 1.00E-08 | 0.00018302 | 0.145 | 0.419 |
| DYNLT3      | 7 | -0.2999991 | 3.84E-07 | 0.00700179 | 0.575 | 0.812 |
| ATP6V1G1    | 7 | -0.3023737 | 1.64E-06 | 0.02992762 | 0.937 | 0.974 |
| NENF        | 7 | -0.3068552 | 8.90E-08 | 0.00162331 | 0.899 | 0.974 |
| MALAT1      | 7 | -0.3087621 | 5.90E-08 | 0.00107683 | 1     | 1     |
| IGF2        | 7 | -0.3192304 | 1.76E-07 | 0.0032096  | 0.039 | 0.222 |
| SSR4        | 7 | -0.3253121 | 1.64E-07 | 0.00299048 | 0.937 | 0.991 |
| FXD1        | 7 | -0.330872  | 2.31E-08 | 0.00042188 | 0.155 | 0.419 |
| FTL         | 7 | -0.3460857 | 3.06E-12 | 5.59E-08   | 1     | 1     |
| NDUFA4L2    | 7 | -0.3461759 | 1.63E-10 | 2.97E-06   | 0.986 | 1     |
| FCGRT       | 7 | -0.3474013 | 6.72E-07 | 0.01226299 | 0.377 | 0.632 |
| SPON2       | 7 | -0.3483407 | 3.31E-07 | 0.00604092 | 0.155 | 0.41  |



|          |   |            |          |            |       |       |
|----------|---|------------|----------|------------|-------|-------|
| SMIM5    | 7 | -0.3517586 | 6.38E-10 | 1.16E-05   | 0.092 | 0.368 |
| N4BP2L2  | 7 | -0.3528808 | 2.56E-07 | 0.0046761  | 0.643 | 0.829 |
| CST3     | 7 | -0.357904  | 9.27E-09 | 0.00016919 | 0.961 | 1     |
| SELM     | 7 | -0.3677984 | 3.25E-11 | 5.93E-07   | 0.957 | 1     |
| C6orf48  | 7 | -0.3719684 | 6.54E-08 | 0.00119328 | 0.758 | 0.915 |
| SRGN     | 7 | -0.3794896 | 2.57E-08 | 0.00046857 | 0.309 | 0.607 |
| PCOLCE2  | 7 | -0.3839975 | 1.16E-06 | 0.02112466 | 0.802 | 0.897 |
| PPIC     | 7 | -0.3862069 | 2.64E-07 | 0.00482613 | 0.778 | 0.897 |
| PPP1R3C  | 7 | -0.3882233 | 2.57E-06 | 0.04693993 | 0.353 | 0.59  |
| SOD3     | 7 | -0.3970173 | 5.34E-08 | 0.00097378 | 0.541 | 0.846 |
| SERPINA1 | 7 | -0.404681  | 1.23E-06 | 0.0225041  | 0.473 | 0.726 |
| PAM      | 7 | -0.4140239 | 2.07E-09 | 3.78E-05   | 0.473 | 0.735 |
| SEPP1    | 7 | -0.4246556 | 6.79E-13 | 1.24E-08   | 0.053 | 0.359 |
| UGP2     | 7 | -0.4350863 | 5.44E-09 | 9.93E-05   | 0.502 | 0.769 |
| C1S      | 7 | -0.4436142 | 7.91E-09 | 0.00014426 | 0.261 | 0.564 |
| VKORC1   | 7 | -0.4480874 | 4.44E-10 | 8.11E-06   | 0.995 | 1     |
| TIMP1    | 7 | -0.4508196 | 2.67E-09 | 4.88E-05   | 0.995 | 1     |
| ATRAID   | 7 | -0.4523262 | 2.81E-11 | 5.13E-07   | 0.787 | 0.94  |
| CD99     | 7 | -0.4524322 | 1.44E-14 | 2.62E-10   | 0.961 | 1     |
| IFI6     | 7 | -0.4589309 | 1.75E-07 | 0.00319973 | 0.357 | 0.632 |
| ID4      | 7 | -0.4608125 | 1.00E-06 | 0.01823814 | 0.512 | 0.718 |
| MFGE8    | 7 | -0.4740233 | 7.33E-08 | 0.00133723 | 0.517 | 0.752 |
| CEBPD    | 7 | -0.4752347 | 3.88E-10 | 7.08E-06   | 0.43  | 0.752 |
| PPP3CA   | 7 | -0.4781715 | 1.22E-06 | 0.02218957 | 0.749 | 0.897 |
| CLEC3A   | 7 | -0.4831329 | 2.28E-12 | 4.16E-08   | 0.068 | 0.376 |
| LUM      | 7 | -0.5026133 | 2.39E-15 | 4.36E-11   | 0.99  | 1     |
| ITM2C    | 7 | -0.5054056 | 2.54E-08 | 0.00046334 | 0.599 | 0.752 |
| WWP2     | 7 | -0.5078463 | 2.07E-09 | 3.78E-05   | 0.43  | 0.709 |
| TMEM59   | 7 | -0.5086695 | 1.79E-12 | 3.27E-08   | 0.816 | 0.957 |
| NUPR1    | 7 | -0.5281493 | 7.50E-09 | 0.00013692 | 0.749 | 0.915 |
| FMOD     | 7 | -0.5348799 | 1.18E-10 | 2.16E-06   | 0.734 | 0.923 |
| BAMBI    | 7 | -0.5511268 | 4.74E-08 | 0.00086576 | 0.29  | 0.556 |
| CP       | 7 | -0.5742972 | 1.96E-13 | 3.58E-09   | 0.145 | 0.513 |
| CAPS     | 7 | -0.5904602 | 1.45E-06 | 0.02645484 | 0.353 | 0.573 |
| IGFBP6   | 7 | -0.5913789 | 2.88E-07 | 0.00526032 | 0.647 | 0.769 |
| HIF1A    | 7 | -0.592561  | 1.85E-11 | 3.37E-07   | 0.763 | 0.897 |
| DCN      | 7 | -0.5956937 | 1.67E-16 | 3.05E-12   | 0.942 | 1     |
| FBXO2    | 7 | -0.598038  | 8.08E-13 | 1.47E-08   | 0.309 | 0.641 |
| MGP      | 7 | -0.6009583 | 5.11E-11 | 9.32E-07   | 0.923 | 0.991 |

| PNRC1     | 7       | -0.6109915 | 8.66E-14 | 1.58E-09   | 0.662 | 0.923 |
|-----------|---------|------------|----------|------------|-------|-------|
| SOX9      | 7       | -0.6133067 | 8.56E-12 | 1.56E-07   | 0.498 | 0.803 |
| ID3       | 7       | -0.6160072 | 1.13E-08 | 0.00020687 | 0.739 | 0.906 |
| COL9A2    | 7       | -0.6298215 | 3.39E-18 | 6.19E-14   | 0.203 | 0.658 |
| SAT1      | 7       | -0.6405208 | 2.22E-08 | 0.00040516 | 0.947 | 0.974 |
| CHI3L2    | 7       | -0.6441249 | 7.67E-10 | 1.40E-05   | 0.382 | 0.65  |
| B2M       | 7       | -0.6530138 | 1.64E-25 | 3.00E-21   | 0.99  | 1     |
| TNFRSF11B | 7       | -0.6642508 | 9.66E-09 | 0.00017618 | 0.401 | 0.684 |
| ITM2B     | 7       | -0.6647567 | 2.63E-17 | 4.81E-13   | 0.899 | 0.983 |
| FGFBP2    | 7       | -0.7208834 | 4.90E-14 | 8.94E-10   | 0.43  | 0.803 |
| HAPLN1    | 7       | -0.7336965 | 1.64E-12 | 3.00E-08   | 0.522 | 0.795 |
| EPYC      | 7       | -0.8015867 | 3.79E-22 | 6.91E-18   | 0.058 | 0.521 |
| COL11A1   | 7       | -0.8091503 | 3.08E-13 | 5.62E-09   | 0.836 | 0.932 |
| S100B     | 7       | -0.8115179 | 1.31E-12 | 2.39E-08   | 0.386 | 0.718 |
| OGN       | 7       | -0.8517318 | 1.92E-13 | 3.50E-09   | 0.473 | 0.803 |
| COL11A2   | 7       | -0.8695731 | 2.13E-25 | 3.89E-21   | 0.126 | 0.667 |
| MIA       | 7       | -0.878656  | 4.31E-20 | 7.86E-16   | 0.739 | 0.94  |
| CTSD      | 7       | -0.8972075 | 7.81E-17 | 1.42E-12   | 0.758 | 0.983 |
| PLAC9     | 7       | -0.9160307 | 1.67E-19 | 3.05E-15   | 0.734 | 0.966 |
| NOVA1     | 7       | -0.9219427 | 5.71E-16 | 1.04E-11   | 0.377 | 0.718 |
| S100A1    | 7       | -0.9604368 | 6.39E-17 | 1.17E-12   | 0.787 | 0.949 |
| SCRG1     | 7       | -1.0193068 | 2.35E-19 | 4.29E-15   | 0.942 | 0.966 |
| C2orf40   | 7       | -1.1129423 | 5.99E-19 | 1.09E-14   | 0.618 | 0.932 |
| COL9A3    | 7       | -1.1266944 | 1.92E-24 | 3.51E-20   | 0.275 | 0.778 |
| ACAN      | 7       | -1.2100741 | 2.53E-25 | 4.62E-21   | 0.705 | 0.932 |
| LECT1     | 7       | -1.3291797 | 1.00E-27 | 1.82E-23   | 0.348 | 0.855 |
| CHI3L1    | 7       | -1.3578476 | 9.43E-21 | 1.72E-16   | 0.454 | 0.897 |
| COL2A1    | 7       | -1.4072325 | 7.16E-23 | 1.31E-18   | 0.425 | 0.897 |
| SLPI      | 7       | -1.4965332 | 9.01E-25 | 1.64E-20   | 0.444 | 0.889 |
| PLA2G2A   | 7       | -1.7524335 | 9.40E-21 | 1.72E-16   | 0.266 | 0.718 |
| gene      | cluster | avg_logFC  | p_val    | p_val_adj  | pct.1 | pct.2 |
| MT2A      | 8       | 1.31271711 | 5.66E-16 | 1.03E-11   | 1     | 1     |
| SERPINE2  | 8       | 0.79079465 | 5.76E-12 | 1.05E-07   | 1     | 1     |
| LGALS1    | 8       | 0.73069656 | 6.59E-12 | 1.20E-07   | 1     | 0.994 |
| ABI3BP    | 8       | 0.6223593  | 1.91E-06 | 0.03482323 | 0.707 | 0.448 |
| RGCC      | 8       | 0.57330742 | 8.72E-09 | 0.00015918 | 0.878 | 0.61  |
| FN1       | 8       | 0.56409956 | 4.45E-12 | 8.12E-08   | 1     | 1     |
| COL6A3    | 8       | 0.51706927 | 2.16E-08 | 0.00039358 | 0.683 | 0.364 |
| NRP2      | 8       | 0.51111253 | 2.24E-10 | 4.10E-06   | 0.537 | 0.156 |

|            |   |            |          |            |       |       |
|------------|---|------------|----------|------------|-------|-------|
| TNC        | 8 | 0.50348165 | 1.57E-12 | 2.86E-08   | 0.476 | 0.084 |
| TGM2       | 8 | 0.50267213 | 1.64E-10 | 2.99E-06   | 0.415 | 0.078 |
| SLC20A1    | 8 | 0.49973687 | 2.45E-06 | 0.04471562 | 0.402 | 0.149 |
| ARPC1B     | 8 | 0.49722511 | 2.38E-07 | 0.00434807 | 0.768 | 0.461 |
| NT5E       | 8 | 0.4805291  | 3.41E-09 | 6.22E-05   | 0.524 | 0.175 |
| TM4SF1     | 8 | 0.47755652 | 2.06E-06 | 0.03752351 | 0.549 | 0.24  |
| SH3BGRL3   | 8 | 0.46849843 | 8.85E-09 | 0.00016146 | 1     | 0.987 |
| BMP2       | 8 | 0.46051497 | 2.94E-07 | 0.00536361 | 0.451 | 0.156 |
| FXYD5      | 8 | 0.4502293  | 2.75E-07 | 0.00502523 | 0.939 | 0.753 |
| S100A16    | 8 | 0.43052006 | 2.48E-06 | 0.04518416 | 0.598 | 0.305 |
| GYPC       | 8 | 0.42843399 | 8.26E-07 | 0.01506506 | 0.512 | 0.234 |
| LTBP1      | 8 | 0.42632117 | 2.58E-06 | 0.04711921 | 0.512 | 0.24  |
| LINC00152  | 8 | 0.41982883 | 4.64E-08 | 0.00084682 | 0.512 | 0.175 |
| WWTR1      | 8 | 0.41790072 | 9.37E-08 | 0.00171057 | 0.671 | 0.344 |
| SLC25A5    | 8 | 0.4138542  | 3.26E-09 | 5.94E-05   | 0.732 | 0.351 |
| TMSB10     | 8 | 0.41357054 | 2.25E-06 | 0.04097836 | 1     | 1     |
| PLP2       | 8 | 0.4102197  | 3.22E-08 | 0.00058721 | 0.866 | 0.506 |
| CCDC109B   | 8 | 0.39890422 | 7.17E-10 | 1.31E-05   | 0.549 | 0.169 |
| VDAC2      | 8 | 0.39166533 | 1.38E-07 | 0.00252385 | 0.72  | 0.403 |
| IER3       | 8 | 0.38955733 | 2.46E-07 | 0.00449609 | 0.439 | 0.136 |
| PPP1R14B   | 8 | 0.36786909 | 2.27E-06 | 0.04144134 | 0.427 | 0.169 |
| NBEAL1     | 8 | 0.34825743 | 7.69E-09 | 0.00014037 | 0.988 | 1     |
| FAP        | 8 | 0.32736112 | 6.70E-08 | 0.00122208 | 0.561 | 0.214 |
| F13A1      | 8 | 0.30745996 | 6.68E-08 | 0.0012191  | 0.378 | 0.091 |
| MIF        | 8 | 0.30223851 | 1.85E-06 | 0.03379039 | 1     | 1     |
| AC090498.1 | 8 | 0.25097494 | 5.24E-07 | 0.00956791 | 1     | 1     |
| FTL        | 8 | -0.2715407 | 2.42E-07 | 0.00442234 | 1     | 1     |
| NDUFA4L2   | 8 | -0.3309727 | 6.26E-11 | 1.14E-06   | 1     | 1     |
| H3F3B      | 8 | -0.3455344 | 3.89E-07 | 0.00708938 | 1     | 1     |
| CST3       | 8 | -0.3683667 | 2.41E-06 | 0.04405357 | 0.988 | 1     |
| B2M        | 8 | -0.3705566 | 1.49E-07 | 0.00271111 | 0.963 | 1     |
| PNRC1      | 8 | -0.3902565 | 1.20E-06 | 0.02192492 | 0.951 | 0.994 |
| PAM        | 8 | -0.4014643 | 5.14E-07 | 0.00938037 | 0.817 | 0.87  |
| TMEM59     | 8 | -0.4059515 | 2.33E-07 | 0.00424281 | 0.915 | 0.994 |
| EID1       | 8 | -0.4324038 | 2.19E-08 | 0.00040021 | 0.854 | 0.968 |
| FXYD1      | 8 | -0.4518105 | 1.65E-06 | 0.03003618 | 0.488 | 0.708 |
| CD59       | 8 | -0.4559233 | 7.66E-08 | 0.00139844 | 0.939 | 0.974 |
| SOX9       | 8 | -0.4603468 | 8.81E-08 | 0.00160725 | 0.768 | 0.883 |
| SMOC2      | 8 | -0.4747687 | 8.51E-07 | 0.01552111 | 0.146 | 0.455 |

| PRELP    | 8       | -0.4814939 | 1.48E-07 | 0.00270601 | 0.927 | 0.994 |
|----------|---------|------------|----------|------------|-------|-------|
| LUM      | 8       | -0.4882483 | 1.74E-06 | 0.03180573 | 1     | 1     |
| SPON2    | 8       | -0.4919094 | 5.85E-07 | 0.01068281 | 0.122 | 0.435 |
| OGN      | 8       | -0.5173398 | 3.56E-07 | 0.00649598 | 0.805 | 0.961 |
| COL11A1  | 8       | -0.520912  | 1.88E-08 | 0.0003427  | 0.951 | 0.994 |
| FGFBP2   | 8       | -0.5665503 | 2.51E-07 | 0.00457567 | 0.927 | 0.994 |
| SNAI2    | 8       | -0.6157036 | 5.61E-07 | 0.01023765 | 0.488 | 0.747 |
| ID1      | 8       | -0.6736771 | 8.10E-08 | 0.00147723 | 0.732 | 0.864 |
| DCN      | 8       | -0.6750162 | 7.18E-14 | 1.31E-09   | 1     | 1     |
| SCRG1    | 8       | -0.6947551 | 8.22E-12 | 1.50E-07   | 1     | 1     |
| WWP2     | 8       | -0.7096718 | 3.34E-11 | 6.10E-07   | 0.585 | 0.857 |
| ID3      | 8       | -0.7764782 | 2.84E-09 | 5.17E-05   | 0.622 | 0.831 |
| COL9A2   | 8       | -0.7926951 | 1.27E-13 | 2.31E-09   | 0.488 | 0.812 |
| COL11A2  | 8       | -0.796883  | 5.26E-17 | 9.59E-13   | 0.634 | 0.929 |
| CP       | 8       | -0.8038154 | 1.32E-07 | 0.00240781 | 0.378 | 0.649 |
| CCDC80   | 8       | -0.9337075 | 5.65E-17 | 1.03E-12   | 0.902 | 0.994 |
| CTSD     | 8       | -0.9935417 | 1.06E-12 | 1.93E-08   | 0.78  | 0.968 |
| LECT1    | 8       | -1.0381677 | 8.56E-19 | 1.56E-14   | 0.841 | 0.994 |
| COL9A3   | 8       | -1.0770878 | 1.07E-15 | 1.95E-11   | 0.634 | 0.916 |
| CHI3L2   | 8       | -1.0772329 | 4.24E-13 | 7.73E-09   | 0.537 | 0.87  |
| ACAN     | 8       | -1.1256622 | 1.68E-29 | 3.07E-25   | 0.976 | 1     |
| PLA2G2A  | 8       | -1.1393716 | 6.48E-09 | 0.0001183  | 0.537 | 0.838 |
| EPYC     | 8       | -1.232519  | 3.61E-19 | 6.58E-15   | 0.195 | 0.792 |
| SLPI     | 8       | -2.1891482 | 1.33E-21 | 2.42E-17   | 0.854 | 1     |
| gene     | cluster | avg_logFC  | p_val    | p_val_adj  | pct.1 | pct.2 |
| COL1A1   | 9       | 1.39798857 | 8.24E-12 | 1.50E-07   | 0.682 | 0.218 |
| LGALS1   | 9       | 1.09960113 | 1.46E-13 | 2.67E-09   | 1     | 1     |
| TMSB4X   | 9       | 0.85065271 | 3.30E-08 | 0.00060272 | 0.977 | 0.941 |
| IGFBP3   | 9       | 0.74293088 | 5.65E-07 | 0.01031221 | 0.773 | 0.465 |
| MT2A     | 9       | 0.69799691 | 2.55E-06 | 0.04653782 | 1     | 1     |
| TPM1     | 9       | 0.69214646 | 3.12E-08 | 0.0005688  | 0.943 | 0.752 |
| PFN1     | 9       | 0.65176639 | 8.07E-08 | 0.00147264 | 0.977 | 0.941 |
| TNC      | 9       | 0.64156704 | 4.60E-09 | 8.40E-05   | 0.739 | 0.366 |
| TMSB10   | 9       | 0.63346019 | 4.80E-10 | 8.76E-06   | 1     | 1     |
| CFL1     | 9       | 0.60663193 | 8.06E-07 | 0.01469958 | 0.943 | 0.911 |
| KIAA0101 | 9       | 0.50488794 | 1.28E-06 | 0.02342925 | 0.364 | 0.069 |
| SERPINE2 | 9       | 0.48623384 | 1.83E-07 | 0.00333949 | 1     | 1     |
| COL8A1   | 9       | 0.44734849 | 4.31E-07 | 0.00786033 | 0.398 | 0.089 |
| YBX1     | 9       | 0.43054451 | 1.29E-07 | 0.00235703 | 0.989 | 0.96  |

|          |   |            |          |            |       |       |
|----------|---|------------|----------|------------|-------|-------|
| SLC25A5  | 9 | 0.41781463 | 1.94E-06 | 0.03540033 | 0.716 | 0.436 |
| UBA52    | 9 | 0.26718949 | 4.72E-08 | 0.00086171 | 1     | 1     |
| SMIM5    | 9 | -0.2750615 | 1.80E-06 | 0.03279382 | 0.023 | 0.277 |
| B2M      | 9 | -0.3083427 | 1.04E-06 | 0.01903614 | 1     | 1     |
| FTL      | 9 | -0.3237178 | 2.67E-07 | 0.00487642 | 1     | 1     |
| ATRAID   | 9 | -0.3813654 | 1.41E-06 | 0.0257879  | 0.943 | 0.99  |
| FCGRT    | 9 | -0.3986188 | 2.10E-06 | 0.03832051 | 0.659 | 0.842 |
| HLA-C    | 9 | -0.4003638 | 3.35E-08 | 0.000611   | 0.966 | 0.98  |
| ECM2     | 9 | -0.4063279 | 1.49E-06 | 0.02711172 | 0.352 | 0.663 |
| CTSF     | 9 | -0.4137999 | 6.63E-07 | 0.01209523 | 0.318 | 0.653 |
| TPD52    | 9 | -0.4282083 | 2.63E-06 | 0.04796181 | 0.352 | 0.653 |
| HLA-A    | 9 | -0.4346465 | 2.26E-08 | 0.00041227 | 0.989 | 1     |
| COL11A1  | 9 | -0.4674691 | 1.46E-06 | 0.02659627 | 0.932 | 0.98  |
| GRN      | 9 | -0.4676883 | 2.74E-07 | 0.00500705 | 0.795 | 0.941 |
| TMEM59   | 9 | -0.4707853 | 7.91E-13 | 1.44E-08   | 0.989 | 1     |
| HLA-B    | 9 | -0.4846041 | 1.47E-06 | 0.02682092 | 0.841 | 0.931 |
| PAM      | 9 | -0.5085874 | 3.88E-10 | 7.08E-06   | 0.557 | 0.921 |
| HAPLN1   | 9 | -0.5193235 | 6.68E-07 | 0.01219247 | 0.784 | 0.98  |
| CST3     | 9 | -0.5319118 | 2.36E-11 | 4.32E-07   | 0.977 | 1     |
| BAMBI    | 9 | -0.5326065 | 1.79E-06 | 0.03263368 | 0.409 | 0.743 |
| ITM2B    | 9 | -0.5333631 | 3.24E-13 | 5.92E-09   | 1     | 1     |
| FRZB     | 9 | -0.546231  | 1.59E-06 | 0.02907769 | 0.159 | 0.485 |
| PSAP     | 9 | -0.5467054 | 6.86E-11 | 1.25E-06   | 0.818 | 1     |
| ITM2A    | 9 | -0.5504735 | 5.23E-09 | 9.55E-05   | 0.545 | 0.881 |
| PCOLCE2  | 9 | -0.5624954 | 1.34E-11 | 2.45E-07   | 0.955 | 0.99  |
| C1R      | 9 | -0.5639472 | 9.95E-09 | 0.00018149 | 0.636 | 0.931 |
| LUM      | 9 | -0.5699103 | 2.79E-10 | 5.09E-06   | 1     | 1     |
| MFGE8    | 9 | -0.5729386 | 1.39E-07 | 0.00252778 | 0.807 | 0.931 |
| PLD3     | 9 | -0.5897016 | 2.08E-10 | 3.79E-06   | 0.784 | 0.97  |
| HIF1A    | 9 | -0.5974347 | 1.11E-08 | 0.00020327 | 0.886 | 0.97  |
| PNRC1    | 9 | -0.5998152 | 1.50E-08 | 0.00027288 | 0.648 | 0.931 |
| IFITM1   | 9 | -0.6181644 | 2.20E-06 | 0.04015896 | 0.42  | 0.723 |
| SOD3     | 9 | -0.6317179 | 5.07E-10 | 9.25E-06   | 0.739 | 0.98  |
| FMOD     | 9 | -0.6331945 | 1.73E-12 | 3.16E-08   | 0.864 | 0.99  |
| SERPING1 | 9 | -0.6387451 | 2.75E-10 | 5.02E-06   | 0.523 | 0.871 |
| OMD      | 9 | -0.6447086 | 3.34E-07 | 0.006095   | 0.17  | 0.495 |
| SERPINA5 | 9 | -0.6669775 | 6.61E-08 | 0.00120589 | 0.693 | 0.891 |
| CRYAB    | 9 | -0.7099523 | 1.67E-06 | 0.03039921 | 0.852 | 0.931 |
| IFI6     | 9 | -0.7145317 | 1.85E-06 | 0.03381844 | 0.455 | 0.693 |

| SERPINA1   | 9       | -0.7234854 | 4.14E-09 | 7.56E-05   | 0.727 | 0.911 |
|------------|---------|------------|----------|------------|-------|-------|
| PRELP      | 9       | -0.7317149 | 5.94E-09 | 0.00010848 | 0.943 | 0.97  |
| CLU        | 9       | -0.7790291 | 1.49E-09 | 2.71E-05   | 0.955 | 1     |
| S100A1     | 9       | -0.7841069 | 1.95E-11 | 3.56E-07   | 0.83  | 0.96  |
| MIA        | 9       | -0.7908137 | 2.88E-14 | 5.25E-10   | 0.83  | 0.99  |
| C1S        | 9       | -0.798925  | 3.92E-16 | 7.16E-12   | 0.636 | 0.97  |
| PLAC9      | 9       | -0.8049827 | 4.48E-11 | 8.18E-07   | 0.75  | 0.96  |
| FBXO2      | 9       | -0.8172528 | 1.07E-13 | 1.95E-09   | 0.432 | 0.881 |
| DCN        | 9       | -0.8240009 | 1.69E-16 | 3.09E-12   | 1     | 1     |
| COL2A1     | 9       | -0.8757948 | 7.44E-10 | 1.36E-05   | 0.511 | 0.871 |
| SCRG1      | 9       | -0.9289418 | 2.94E-16 | 5.37E-12   | 0.966 | 1     |
| CP         | 9       | -0.9403715 | 7.17E-12 | 1.31E-07   | 0.398 | 0.842 |
| COL11A2    | 9       | -0.9971962 | 9.86E-15 | 1.80E-10   | 0.261 | 0.772 |
| COL9A2     | 9       | -1.0424615 | 1.54E-15 | 2.81E-11   | 0.352 | 0.842 |
| ACAN       | 9       | -1.0614819 | 6.73E-16 | 1.23E-11   | 0.83  | 0.98  |
| C2orf40    | 9       | -1.0629174 | 1.15E-12 | 2.09E-08   | 0.83  | 0.99  |
| CHI3L1     | 9       | -1.0723743 | 1.56E-11 | 2.84E-07   | 0.511 | 0.921 |
| CTSD       | 9       | -1.0928467 | 9.07E-15 | 1.65E-10   | 0.955 | 1     |
| FGFBP2     | 9       | -1.1347167 | 9.00E-12 | 1.64E-07   | 0.58  | 0.97  |
| OGN        | 9       | -1.1534404 | 6.40E-14 | 1.17E-09   | 0.636 | 0.96  |
| CFD        | 9       | -1.1572019 | 3.42E-11 | 6.23E-07   | 0.125 | 0.574 |
| C2orf82    | 9       | -1.2214605 | 3.63E-07 | 0.00661673 | 0.739 | 0.881 |
| PLA2G2A    | 9       | -1.355084  | 4.33E-08 | 0.00078961 | 0.443 | 0.752 |
| CHI3L2     | 9       | -1.3609886 | 5.48E-13 | 1.00E-08   | 0.625 | 0.901 |
| COL9A3     | 9       | -1.3928477 | 1.02E-17 | 1.86E-13   | 0.42  | 0.911 |
| MATN4      | 9       | -1.398729  | 3.05E-11 | 5.56E-07   | 0.023 | 0.446 |
| LECT1      | 9       | -1.6831382 | 8.88E-20 | 1.62E-15   | 0.625 | 0.95  |
| EPYC       | 9       | -1.8643891 | 3.76E-20 | 6.86E-16   | 0.307 | 0.901 |
| SLPI       | 9       | -1.9370569 | 1.02E-13 | 1.86E-09   | 0.648 | 0.931 |
| gene       | cluster | avg_logFC  | p_val    | p_val_adj  | pct.1 | pct.2 |
| CD55       | 10      | 0.89802673 | 9.35E-19 | 1.71E-14   | 0.966 | 0.663 |
| HMGA1      | 10      | 0.77945856 | 1.00E-12 | 1.83E-08   | 0.862 | 0.49  |
| GSTO1      | 10      | 0.52538989 | 2.34E-11 | 4.28E-07   | 0.924 | 0.633 |
| GYPC       | 10      | 0.48157707 | 1.44E-07 | 0.00262608 | 0.683 | 0.418 |
| SNHG12     | 10      | 0.40842271 | 3.47E-07 | 0.00633494 | 0.8   | 0.561 |
| EIF1       | 10      | 0.33623053 | 1.48E-09 | 2.71E-05   | 1     | 1     |
| ZFAS1      | 10      | 0.33161637 | 2.14E-08 | 0.00039013 | 1     | 0.99  |
| CSNK2B     | 10      | 0.30763745 | 1.52E-06 | 0.02768885 | 0.876 | 0.694 |
| AC090498.1 | 10      | 0.30283124 | 1.50E-12 | 2.74E-08   | 1     | 1     |

|          |    |            |          |            |       |       |
|----------|----|------------|----------|------------|-------|-------|
| EEF1A1   | 10 | -0.2923275 | 2.70E-09 | 4.92E-05   | 1     | 1     |
| FTL      | 10 | -0.3217065 | 2.18E-08 | 0.00039756 | 1     | 1     |
| RTN4     | 10 | -0.3331979 | 1.31E-07 | 0.00239461 | 0.683 | 0.918 |
| RNF152   | 10 | -0.347595  | 7.19E-08 | 0.00131227 | 0.103 | 0.388 |
| SMOC2    | 10 | -0.350381  | 2.63E-07 | 0.0047957  | 0.021 | 0.224 |
| CTSF     | 10 | -0.3530518 | 2.97E-10 | 5.42E-06   | 0.083 | 0.418 |
| FXYD1    | 10 | -0.3540259 | 1.23E-06 | 0.02244548 | 0.11  | 0.357 |
| PGK1     | 10 | -0.3553986 | 2.23E-06 | 0.04067402 | 0.91  | 0.98  |
| FKBP9    | 10 | -0.3558343 | 1.53E-06 | 0.02791304 | 0.138 | 0.398 |
| ISLR     | 10 | -0.3578647 | 3.71E-10 | 6.77E-06   | 0.034 | 0.327 |
| SPON2    | 10 | -0.3652746 | 2.62E-08 | 0.00047834 | 0.048 | 0.306 |
| ANGPTL2  | 10 | -0.369419  | 3.37E-07 | 0.0061503  | 0.214 | 0.5   |
| LY6E     | 10 | -0.3709322 | 9.57E-07 | 0.01745575 | 0.276 | 0.551 |
| NUCB1    | 10 | -0.378222  | 9.42E-08 | 0.00171957 | 0.379 | 0.673 |
| NDUFA4L2 | 10 | -0.3843359 | 4.97E-13 | 9.06E-09   | 1     | 1     |
| DDR2     | 10 | -0.3862261 | 9.80E-08 | 0.00178824 | 0.214 | 0.52  |
| SAT1     | 10 | -0.3942477 | 7.10E-07 | 0.0129486  | 0.931 | 0.969 |
| COL11A2  | 10 | -0.4075977 | 3.53E-07 | 0.00643405 | 0.193 | 0.5   |
| MALAT1   | 10 | -0.4142152 | 6.56E-09 | 0.00011979 | 1     | 1     |
| IFITM2   | 10 | -0.4178094 | 1.01E-06 | 0.01849511 | 0.683 | 0.878 |
| LSP1     | 10 | -0.4285802 | 1.46E-08 | 0.00026604 | 0.09  | 0.388 |
| CFD      | 10 | -0.4288075 | 5.08E-08 | 0.00092709 | 0.062 | 0.327 |
| B2M      | 10 | -0.4319323 | 1.94E-09 | 3.54E-05   | 0.959 | 1     |
| HSP90B1  | 10 | -0.4322072 | 4.98E-08 | 0.00090961 | 0.593 | 0.847 |
| HTRA1    | 10 | -0.4374885 | 1.88E-06 | 0.03437545 | 0.524 | 0.776 |
| AHNAK    | 10 | -0.4413632 | 6.71E-09 | 0.00012239 | 0.186 | 0.52  |
| PPP3CA   | 10 | -0.4423493 | 1.11E-10 | 2.02E-06   | 0.993 | 1     |
| CDK5RAP2 | 10 | -0.4548244 | 2.30E-06 | 0.0419928  | 0.11  | 0.357 |
| CA9      | 10 | -0.4619705 | 1.59E-06 | 0.02906921 | 0.338 | 0.592 |
| VCAN     | 10 | -0.4662993 | 3.48E-08 | 0.00063474 | 0.11  | 0.408 |
| CLU      | 10 | -0.4724588 | 1.65E-07 | 0.00300457 | 0.993 | 1     |
| CD99     | 10 | -0.4737398 | 3.18E-08 | 0.0005794  | 0.786 | 0.929 |
| AEBP1    | 10 | -0.476232  | 6.15E-07 | 0.01122729 | 0.476 | 0.724 |
| FGFBP2   | 10 | -0.4776013 | 9.14E-07 | 0.01668133 | 0.945 | 1     |
| COL9A3   | 10 | -0.4841396 | 3.09E-08 | 0.00056451 | 0.241 | 0.582 |
| PCOLCE2  | 10 | -0.4866455 | 1.39E-08 | 0.00025417 | 0.71  | 0.918 |
| HIF1A    | 10 | -0.5103886 | 3.27E-09 | 5.97E-05   | 0.724 | 0.939 |
| FXYD6    | 10 | -0.5129334 | 3.27E-08 | 0.0005972  | 0.572 | 0.806 |
| CCDC85B  | 10 | -0.5132589 | 5.28E-08 | 0.00096282 | 0.931 | 0.99  |

| EPYC       | 10      | -0.5227945 | 5.16E-11 | 9.42E-07   | 0.034 | 0.347 |
|------------|---------|------------|----------|------------|-------|-------|
| SUMF2      | 10      | -0.535955  | 3.24E-09 | 5.91E-05   | 0.441 | 0.735 |
| WWP2       | 10      | -0.5394701 | 1.80E-09 | 3.28E-05   | 0.49  | 0.806 |
| PAM        | 10      | -0.5419408 | 4.04E-09 | 7.37E-05   | 0.352 | 0.673 |
| PHKG1      | 10      | -0.5428466 | 1.33E-08 | 0.00024358 | 0.414 | 0.714 |
| GAPDH      | 10      | -0.5449471 | 1.42E-08 | 0.00025899 | 1     | 1     |
| LCN2       | 10      | -0.5716217 | 1.32E-06 | 0.02402527 | 0.248 | 0.52  |
| C10orf10   | 10      | -0.5836004 | 1.23E-06 | 0.02243663 | 0.414 | 0.684 |
| NGFRAP1    | 10      | -0.5837114 | 1.51E-10 | 2.75E-06   | 0.545 | 0.796 |
| VKORC1     | 10      | -0.60939   | 8.04E-13 | 1.47E-08   | 0.855 | 0.969 |
| SCRG1      | 10      | -0.6168635 | 5.45E-07 | 0.00993646 | 0.959 | 1     |
| DCN        | 10      | -0.6185831 | 5.54E-17 | 1.01E-12   | 1     | 1     |
| CLEC3A     | 10      | -0.6188237 | 9.61E-09 | 0.00017533 | 0.041 | 0.306 |
| FMOD       | 10      | -0.6530762 | 3.90E-11 | 7.13E-07   | 0.621 | 0.827 |
| CST3       | 10      | -0.6587792 | 2.66E-15 | 4.86E-11   | 0.945 | 1     |
| MT1F       | 10      | -0.8127184 | 2.31E-10 | 4.21E-06   | 0.814 | 0.929 |
| IGFBP5     | 10      | -0.8128161 | 1.03E-09 | 1.89E-05   | 0.2   | 0.551 |
| S100B      | 10      | -0.8156481 | 5.76E-14 | 1.05E-09   | 0.462 | 0.827 |
| ID3        | 10      | -0.8197042 | 1.75E-08 | 0.00031885 | 0.11  | 0.408 |
| COL11A1    | 10      | -0.8530227 | 2.47E-12 | 4.51E-08   | 0.372 | 0.765 |
| CHI3L1     | 10      | -0.8661591 | 1.78E-11 | 3.25E-07   | 0.814 | 0.969 |
| C2orf40    | 10      | -0.8688759 | 3.88E-15 | 7.08E-11   | 0.945 | 0.99  |
| OGN        | 10      | -0.881907  | 4.83E-12 | 8.82E-08   | 0.559 | 0.878 |
| RBP4       | 10      | -0.912633  | 2.93E-16 | 5.34E-12   | 0.338 | 0.786 |
| COL2A1     | 10      | -0.9316731 | 6.34E-11 | 1.16E-06   | 0.159 | 0.531 |
| PLAC9      | 10      | -0.9405189 | 1.02E-13 | 1.86E-09   | 0.345 | 0.755 |
| MT1G       | 10      | -0.9410638 | 4.88E-10 | 8.90E-06   | 0.931 | 0.969 |
| LECT1      | 10      | -0.9411687 | 1.77E-16 | 3.23E-12   | 0.31  | 0.816 |
| CHI3L2     | 10      | -0.9994682 | 4.82E-16 | 8.80E-12   | 0.497 | 0.888 |
| ACAN       | 10      | -1.0890372 | 1.49E-20 | 2.72E-16   | 0.752 | 0.99  |
| SLPI       | 10      | -1.1112803 | 7.89E-17 | 1.44E-12   | 0.71  | 0.98  |
| PRELP      | 10      | -1.2103476 | 3.05E-26 | 5.57E-22   | 0.676 | 1     |
| CCDC80     | 10      | -1.3027906 | 6.12E-20 | 1.12E-15   | 0.676 | 0.98  |
| PLA2G2A    | 10      | -1.3047457 | 2.47E-15 | 4.50E-11   | 0.255 | 0.724 |
| CTSD       | 10      | -1.5622504 | 2.56E-21 | 4.66E-17   | 0.738 | 0.959 |
| gene       | cluster | avg_logFC  | p_val    | p_val_adj  | pct.1 | pct.2 |
| HMGA1      | 11      | 0.79798069 | 1.92E-06 | 0.03506226 | 0.658 | 0.329 |
| NBEAL1     | 11      | 0.50571889 | 1.62E-09 | 2.96E-05   | 0.973 | 0.943 |
| AC090498.1 | 11      | 0.45632901 | 1.12E-11 | 2.04E-07   | 1     | 1     |



|              |         |            |          |            |       |       |
|--------------|---------|------------|----------|------------|-------|-------|
| ZFAS1        | 11      | 0.45100381 | 9.85E-09 | 0.00017981 | 1     | 0.986 |
| RPS27        | 11      | 0.38525666 | 2.28E-10 | 4.17E-06   | 1     | 1     |
| RPL10        | 11      | 0.31408661 | 4.93E-07 | 0.00900054 | 1     | 1     |
| RPL27A       | 11      | 0.3020781  | 5.01E-07 | 0.00913497 | 1     | 1     |
| RPL37        | 11      | 0.29405514 | 1.64E-06 | 0.0298854  | 1     | 1     |
| RPL41        | 11      | 0.28949612 | 1.04E-07 | 0.00190414 | 1     | 1     |
| BSG          | 11      | -0.4453307 | 8.63E-07 | 0.01575029 | 0.575 | 0.857 |
| CD99         | 11      | -0.4841788 | 2.07E-06 | 0.03774976 | 0.753 | 0.943 |
| SAT1         | 11      | -0.530885  | 1.56E-06 | 0.02843739 | 0.945 | 1     |
| PKM          | 11      | -0.6415108 | 1.76E-08 | 0.00032196 | 0.849 | 0.971 |
| CST3         | 11      | -0.7107374 | 6.98E-08 | 0.00127399 | 0.918 | 0.957 |
| RBP4         | 11      | -0.9261666 | 1.04E-07 | 0.00189056 | 0.288 | 0.686 |
| CTSD         | 11      | -1.0821183 | 7.13E-08 | 0.0013005  | 0.836 | 0.957 |
| gene         | cluster | avg_logFC  | p_val    | p_val_adj  | pct.1 | pct.2 |
| SPP1         | 12      | 1.5785977  | 1.10E-07 | 0.00200131 | 0.964 | 0.75  |
| RGCC         | 12      | 0.94321239 | 3.90E-13 | 7.12E-09   | 0.973 | 0.68  |
| UPP1         | 12      | 0.8020883  | 7.68E-15 | 1.40E-10   | 0.893 | 0.48  |
| SMOX         | 12      | 0.7037554  | 2.64E-07 | 0.00480914 | 0.545 | 0.25  |
| C11orf96     | 12      | 0.69299959 | 1.22E-07 | 0.00223203 | 0.464 | 0.16  |
| TIMP3        | 12      | 0.66800106 | 2.49E-07 | 0.0045489  | 0.83  | 0.55  |
| TM4SF1       | 12      | 0.65108152 | 7.69E-07 | 0.01403156 | 0.83  | 0.53  |
| HMGA1        | 12      | 0.62890811 | 3.04E-09 | 5.55E-05   | 0.696 | 0.34  |
| NRP2         | 12      | 0.59458981 | 1.30E-07 | 0.00237112 | 0.652 | 0.35  |
| CD55         | 12      | 0.57294562 | 8.14E-10 | 1.48E-05   | 0.982 | 0.82  |
| RGS16        | 12      | 0.5285252  | 7.57E-07 | 0.01381685 | 0.402 | 0.1   |
| HMGA2        | 12      | 0.40630757 | 3.54E-07 | 0.00646541 | 0.384 | 0.08  |
| EPB41L4A-AS1 | 12      | 0.38901955 | 1.05E-06 | 0.01916744 | 0.946 | 0.75  |
| EIF1         | 12      | 0.25342743 | 1.38E-06 | 0.02523355 | 1     | 1     |
| CLEC3A       | 12      | -0.3205568 | 5.75E-07 | 0.01048898 | 0.107 | 0.41  |
| NDUFA4L2     | 12      | -0.3412137 | 3.26E-10 | 5.94E-06   | 1     | 1     |
| SMOC2        | 12      | -0.3557542 | 4.05E-07 | 0.00739017 | 0.009 | 0.23  |
| EID1         | 12      | -0.3646431 | 9.94E-08 | 0.00181424 | 0.661 | 0.93  |
| ITM2B        | 12      | -0.3841854 | 1.03E-07 | 0.00187683 | 0.982 | 1     |
| BSG          | 12      | -0.3939436 | 1.11E-06 | 0.02029951 | 0.473 | 0.76  |
| SPON2        | 12      | -0.3965762 | 9.39E-08 | 0.00171304 | 0.009 | 0.25  |
| TPM2         | 12      | -0.4072027 | 2.07E-06 | 0.03770118 | 0.321 | 0.62  |
| FKBP9        | 12      | -0.4072413 | 6.25E-09 | 0.00011406 | 0.062 | 0.39  |
| BHLHE41      | 12      | -0.4131321 | 1.08E-08 | 0.0001974  | 0.071 | 0.4   |
| HSP90B1      | 12      | -0.4209162 | 4.03E-07 | 0.00735289 | 0.679 | 0.89  |

|          |    |            |          |            |       |      |
|----------|----|------------|----------|------------|-------|------|
| PRSS23   | 12 | -0.4234836 | 2.61E-06 | 0.04767754 | 0.071 | 0.32 |
| NGFRAP1  | 12 | -0.4389715 | 9.45E-07 | 0.01724834 | 0.589 | 0.84 |
| CTSF     | 12 | -0.4584872 | 2.84E-10 | 5.18E-06   | 0.143 | 0.54 |
| GPX3     | 12 | -0.4640689 | 1.47E-06 | 0.02674746 | 0.821 | 0.92 |
| IFITM3   | 12 | -0.4643997 | 2.26E-08 | 0.00041168 | 0.795 | 0.94 |
| GSN      | 12 | -0.4647266 | 3.23E-07 | 0.00589657 | 0.339 | 0.62 |
| PRDX2    | 12 | -0.4651727 | 2.64E-07 | 0.00481944 | 0.625 | 0.79 |
| HLA-A    | 12 | -0.5005931 | 4.42E-09 | 8.06E-05   | 0.902 | 0.99 |
| PRDX4    | 12 | -0.5032896 | 3.94E-08 | 0.00071932 | 0.679 | 0.87 |
| CST3     | 12 | -0.5164763 | 2.37E-10 | 4.32E-06   | 0.982 | 1    |
| VKORC1   | 12 | -0.5170917 | 7.26E-12 | 1.32E-07   | 0.875 | 0.99 |
| GAPDH    | 12 | -0.5184145 | 1.21E-11 | 2.22E-07   | 1     | 1    |
| PSAP     | 12 | -0.5211663 | 1.38E-09 | 2.52E-05   | 0.902 | 0.95 |
| CLU      | 12 | -0.5275094 | 1.43E-06 | 0.02618343 | 1     | 1    |
| CD99     | 12 | -0.5397005 | 8.86E-12 | 1.62E-07   | 0.768 | 0.92 |
| LRPAP1   | 12 | -0.5418798 | 1.26E-09 | 2.30E-05   | 0.286 | 0.65 |
| ATRAID   | 12 | -0.5428334 | 3.08E-10 | 5.61E-06   | 0.714 | 0.87 |
| TGFBI    | 12 | -0.5446234 | 1.84E-06 | 0.0336277  | 0.562 | 0.82 |
| PKM      | 12 | -0.5543996 | 6.95E-13 | 1.27E-08   | 0.964 | 0.99 |
| SERPING1 | 12 | -0.577861  | 9.94E-10 | 1.81E-05   | 0.58  | 0.88 |
| DCN      | 12 | -0.6014961 | 7.59E-18 | 1.39E-13   | 1     | 1    |
| FMOD     | 12 | -0.6080249 | 9.20E-12 | 1.68E-07   | 0.848 | 0.98 |
| WWP2     | 12 | -0.6241543 | 1.72E-08 | 0.00031437 | 0.5   | 0.74 |
| BAMBI    | 12 | -0.6251588 | 1.53E-07 | 0.0027901  | 0.339 | 0.69 |
| HIF1A    | 12 | -0.6493446 | 2.70E-08 | 0.000493   | 0.821 | 0.98 |
| C1S      | 12 | -0.6644386 | 3.59E-11 | 6.55E-07   | 0.589 | 0.85 |
| ACAN     | 12 | -0.6785155 | 3.51E-10 | 6.40E-06   | 0.75  | 0.96 |
| S100B    | 12 | -0.6835325 | 1.07E-07 | 0.00195981 | 0.598 | 0.75 |
| CA9      | 12 | -0.7000715 | 3.04E-10 | 5.55E-06   | 0.5   | 0.77 |
| COL11A1  | 12 | -0.7084512 | 9.73E-13 | 1.78E-08   | 0.268 | 0.73 |
| CCDC80   | 12 | -0.7298994 | 1.03E-08 | 0.00018852 | 0.875 | 0.98 |
| PLAC9    | 12 | -0.7453679 | 1.35E-08 | 0.00024646 | 0.357 | 0.72 |
| RBP4     | 12 | -0.7471364 | 2.67E-11 | 4.88E-07   | 0.527 | 0.86 |
| CHI3L2   | 12 | -0.7474423 | 1.37E-07 | 0.00249313 | 0.786 | 0.96 |
| C2orf40  | 12 | -0.755014  | 2.38E-14 | 4.35E-10   | 1     | 1    |
| LECT1    | 12 | -0.8037324 | 3.20E-11 | 5.84E-07   | 0.732 | 0.95 |
| PRELP    | 12 | -0.830346  | 1.12E-16 | 2.05E-12   | 0.982 | 0.99 |
| LCN2     | 12 | -0.8498634 | 4.57E-08 | 0.00083344 | 0.554 | 0.84 |
| PLA2G2A  | 12 | -0.9210331 | 1.58E-09 | 2.88E-05   | 0.348 | 0.77 |

|             |                |                  |              |                  |              |              |
|-------------|----------------|------------------|--------------|------------------|--------------|--------------|
| IGFBP6      | 12             | -0.9612557       | 5.07E-10     | 9.25E-06         | 0.482        | 0.79         |
| MT1F        | 12             | -0.9905928       | 8.81E-08     | 0.00160729       | 0.759        | 0.92         |
| MT1G        | 12             | -1.0912614       | 4.17E-08     | 0.00076155       | 0.911        | 1            |
| CTSD        | 12             | -1.6742918       | 4.57E-23     | 8.34E-19         | 0.732        | 0.98         |
| <b>gene</b> | <b>cluster</b> | <b>avg_logFC</b> | <b>p_val</b> | <b>p_val_adj</b> | <b>pct.1</b> | <b>pct.2</b> |
| MT2A        | 13             | 0.82780234       | 7.55E-07     | 0.01377231       | 1            | 1            |
| PAPSS1      | 13             | -0.4560737       | 1.50E-06     | 0.02728784       | 0.227        | 0.7          |
| NDUFA4L2    | 13             | -0.4627149       | 2.19E-06     | 0.03988547       | 0.979        | 1            |
| EBF1        | 13             | -0.4900283       | 1.71E-09     | 3.12E-05         | 0.062        | 0.533        |
| B2M         | 13             | -0.6233797       | 1.34E-07     | 0.00244962       | 1            | 1            |
| COL9A2      | 13             | -0.6446695       | 4.85E-08     | 0.00088559       | 0.134        | 0.6          |
| COL11A2     | 13             | -0.7365852       | 1.64E-06     | 0.02999717       | 0.134        | 0.5          |
| HAPLN1      | 13             | -0.7864822       | 9.93E-07     | 0.01811648       | 0.495        | 0.9          |
| C1S         | 13             | -0.8121438       | 7.95E-09     | 0.00014512       | 0.216        | 0.7          |
| CFD         | 13             | -0.9111493       | 6.69E-07     | 0.01221458       | 0.052        | 0.4          |
| BAMBI       | 13             | -0.9927656       | 3.80E-08     | 0.00069353       | 0.196        | 0.667        |
| DCN         | 13             | -1.0638704       | 6.82E-08     | 0.00124502       | 0.918        | 1            |
| COL9A3      | 13             | -1.0971406       | 7.00E-10     | 1.28E-05         | 0.216        | 0.767        |
| SCRG1       | 13             | -1.2424167       | 7.68E-08     | 0.0014013        | 0.918        | 0.967        |
| CHI3L1      | 13             | -1.2895858       | 3.26E-08     | 0.00059478       | 0.299        | 0.8          |
| COL2A1      | 13             | -1.2999444       | 6.58E-07     | 0.01201391       | 0.433        | 0.833        |
| C2orf40     | 13             | -1.3046669       | 1.26E-09     | 2.30E-05         | 0.577        | 0.967        |
| ACAN        | 13             | -1.3304183       | 4.23E-11     | 7.72E-07         | 0.68         | 0.933        |
| EPYC        | 13             | -1.4634658       | 1.01E-09     | 1.83E-05         | 0.062        | 0.533        |
| CTSD        | 13             | -1.542369        | 1.39E-12     | 2.53E-08         | 0.608        | 1            |
| LECT1       | 13             | -1.5692981       | 1.29E-09     | 2.35E-05         | 0.402        | 0.833        |
| PLA2G2A     | 13             | -1.6608087       | 3.69E-10     | 6.74E-06         | 0.361        | 0.867        |
| CHI3L2      | 13             | -1.6996067       | 9.85E-13     | 1.80E-08         | 0.33         | 0.933        |
| SLPI        | 13             | -1.8486423       | 7.38E-10     | 1.35E-05         | 0.423        | 0.9          |
