# Supplementary material for: Single-Cell RNA-Seq Analysis of Cells from Degenerating and Non-Degenerating Intervertebral Discs from the Same Individual Reveals New Biomarkers for Intervertebral Disc Degeneration
Source: MDPI journal article supplement (doi:10.3390/ijms23073993), 2022-04-03
Supplement: s1 [file s1]

**Table S25.** Classification of selected genes according to their expression pattern.

|         | nD vs D    |    |    | scRNA-seq/<br>qPCR results<br>Correlation |    |
|---------|------------|----|----|-------------------------------------------|----|
|         | Genes      | NP | AF | NP                                        | AF |
| Group 1 | UPP1       |    |    | -                                         | -  |
|         | PRG4       |    |    | -                                         | -  |
|         | MT1G       |    |    | -                                         | -  |
|         | MT2A       |    |    | +                                         | -  |
|         | FRZB       |    |    | -                                         | -  |
|         | ADIRF      |    |    | -                                         | +  |
|         | Vimentin   |    |    | +                                         | +  |
|         | MT-ND2     |    |    | -                                         | -  |
|         | MT-CYB     |    |    | -                                         | -  |
|         | CAPS       |    |    | -                                         | -  |
|         | SYF2 (p29) |    |    | +                                         | +  |
|         | MGST1      |    |    | -                                         | +  |
|         | TAF1D      |    |    | +                                         | +  |
|         | MT1F       |    |    | +                                         | +  |
|         | TNFRSF11B  |    |    | -                                         | -  |
|         | S100A2     |    |    | +                                         | -  |
|         | MSMP       |    |    | -                                         | -  |
|         | SPTSSB     |    |    | -                                         | -  |
|         | HMGA1      |    |    | -                                         | -  |
|         | FGFBP2     |    |    | -                                         | -  |
| Group 2 | SOD2       |    |    | -                                         | +  |
|         | IGFBP3     |    |    | -                                         | -  |
|         | SLPI       |    |    | -                                         | -  |
|         | C2orf40    |    |    | -                                         | -  |
|         | S100B      |    |    | -                                         | -  |
|         | Col2A1     |    |    | -                                         | -  |
|         | FBXO2      |    |    | -                                         | -  |
|         | S100A1     |    |    | +                                         | -  |
|         | CLEC3A     |    |    | -                                         | -  |

|         |  |  |   |   |
|---------|--|--|---|---|
| CHI3L2  |  |  | - | - |
| PLA2G2A |  |  | - | - |
| CTGF    |  |  | - | - |
| EPYC    |  |  | - | - |

### Legend

|                                           |
|-------------------------------------------|
| Homogenous Expression<br>in 14 Clusters   |
| Opposite expression<br>within 14 clusters |

(+): scRNA-seq result **validated** by qPCR

(-): scRNA-seq result **not validated** by qPCR

**Group 1:** Similar pattern of expression between NP and AF

**Group 2:** Opposite pattern of expression between NP and AF
