# Supplementary material for: Single-Cell RNA-Seq Analysis of Cells from Degenerating and Non-Degenerating Intervertebral Discs from the Same Individual Reveals New Biomarkers for Intervertebral Disc Degeneration
Source: MDPI journal article supplement (doi:10.3390/ijms23073993), 2022-04-03
Supplement: s1 [file s1]

**Table S8.** NPnD vs iAFnD in total cell analysis.

| Gene       | logFC.AF     | Pval.AF   | Fdr.AF    | logFC.NP  | Pval.NP   | Fdr.NP    |
|------------|--------------|-----------|-----------|-----------|-----------|-----------|
| A4GALT     | 0.259909053  | 1.84E-120 | 3.35E-116 | 0.162967  | 4.15E-89  | 7.57E-85  |
| ABHD14A    | -0.1259594   | 1.38E-23  | 2.52E-19  | -0.27304  | 3.30E-154 | 6.03E-150 |
| ABI3BP     | 0.117949862  | 4.67E-07  | 8.51E-03  | 4.46E-01  | 5.97E-81  | 1.09E-76  |
| AC003090.1 | -0.29652262  | 5.26E-128 | 9.60E-124 | -3.60E-01 | 9.58E-276 | 1.75E-271 |
| AC005152.3 | -0.237572752 | 2.37E-94  | 4.33E-90  | -2.85E-01 | 4.48E-175 | 8.17E-171 |
| AC090498.1 | -0.045082659 | 5.13E-07  | 9.37E-03  | 3.07E-01  | 1.39E-259 | 2.53E-255 |
| ACAN       | -0.242208226 | 3.61E-86  | 6.59E-82  | -1.06304  | 0         | 0         |
| ACTG1      | -0.738803033 | 0.00E+00  | 0.00E+00  | -0.42731  | 2.52E-189 | 4.60E-185 |
| ADAMTS6    | 0.358049185  | 1.80E-102 | 3.29E-98  | 0.234479  | 3.79E-54  | 6.92E-50  |
| ADIRF      | -1.159908787 | 0.00E+00  | 0.00E+00  | -1.13737  | 0         | 0         |
| ADM        | 0.634712081  | 1.49E-124 | 2.72E-120 | 0.278125  | 1.22E-19  | 2.22E-15  |
| ADSS       | 0.244699737  | 2.31E-40  | 4.22E-36  | 0.429081  | 6.01E-139 | 1.10E-134 |
| AEBP1      | 0.389886874  | 1.90E-83  | 3.47E-79  | 0.190889  | 5.25E-13  | 9.57E-09  |
| AFF3       | -0.287261958 | 9.58E-133 | 1.75E-128 | -0.28413  | 1.98E-196 | 3.62E-192 |
| AHNAK      | -0.209314149 | 3.79E-43  | 6.91E-39  | -0.35713  | 1.54E-144 | 2.81E-140 |
| AHNAK2     | -0.266978893 | 2.72E-62  | 4.96E-58  | -0.28105  | 4.24E-94  | 7.74E-90  |
| AIMP1      | 0.064144662  | 7.18E-03  | 1.00E+00  | 0.293913  | 2.97E-71  | 5.41E-67  |
| AK2        | 0.454154678  | 1.39E-112 | 2.53E-108 | 0.46028   | 3.68E-148 | 6.72E-144 |
| AKAP12     | 0            | NA        | NA        | 0.290599  | 7.05E-122 | 1.29E-117 |
| ANGPTL4    | 0.290228624  | 2.20E-50  | 4.01E-46  | 0.166131  | 1.88E-22  | 3.42E-18  |
| ANGPTL5    | -0.179909676 | 2.44E-38  | 4.45E-34  | -0.25481  | 1.05E-118 | 1.91E-114 |
| ANXA5      | 0.039381562  | 1.22E-01  | 1.00E+00  | 0.2854    | 1.58E-92  | 2.89E-88  |
| AP2M1      | -0.313852914 | 5.77E-93  | 1.05E-88  | -0.39382  | 2.66E-180 | 4.85E-176 |
| APOD       | -0.842829333 | 1.41E-222 | 2.57E-218 | -0.70612  | 1.10E-231 | 2.00E-227 |
| ARF4       | 0.305211542  | 8.63E-66  | 1.57E-61  | 0.26348   | 3.97E-66  | 7.25E-62  |
| ARF6       | 0.55047121   | 2.24E-176 | 4.09E-172 | 0.525656  | 4.75E-251 | 8.67E-247 |
| ARHGAP29   | -0.462284385 | 6.40E-142 | 1.17E-137 | -4.77E-01 | 1.51E-209 | 2.76E-205 |
| ARL2BP     | -0.30685546  | 8.76E-89  | 1.60E-84  | -0.33779  | 3.71E-126 | 6.78E-122 |
| ARL6IP4    | -0.211094794 | 7.14E-62  | 1.30E-57  | -0.2694   | 1.17E-126 | 2.13E-122 |
| ARL6IP5    | -0.260517764 | 1.97E-66  | 3.59E-62  | -0.37882  | 1.65E-168 | 3.00E-164 |
| ARPC1A     | -0.270898981 | 9.64E-79  | 1.76E-74  | -0.30391  | 4.51E-127 | 8.24E-123 |
| ARPC1B     | -0.305487112 | 1.54E-50  | 2.80E-46  | -0.22583  | 2.90E-41  | 5.29E-37  |
| ARPP19     | 0.36008382   | 1.09E-100 | 2.00E-96  | 0.456979  | 8.80E-179 | 1.61E-174 |
| ARRDC3     | 0.514501097  | 8.80E-90  | 1.61E-85  | 0.201655  | 1.77E-24  | 3.22E-20  |
| ASPN       | -0.137186971 | 2.29E-18  | 4.17E-14  | -0.39804  | 2.47E-99  | 4.51E-95  |
| ATF4       | 0.059800302  | 3.52E-05  | 6.43E-01  | 0.255941  | 7.75E-79  | 1.41E-74  |

|          |              |           |           |          |           |           |
|----------|--------------|-----------|-----------|----------|-----------|-----------|
| ATP5A1   | -0.304315905 | 3.39E-90  | 6.18E-86  | -0.2845  | 2.08E-100 | 3.80E-96  |
| ATP5D    | -0.277876275 | 3.78E-99  | 6.90E-95  | -0.24584 | 7.47E-94  | 1.36E-89  |
| ATP5G2   | -0.337399853 | 2.74E-159 | 4.99E-155 | -0.11939 | 1.43E-24  | 2.61E-20  |
| ATP5L    | -0.286929692 | 5.83E-119 | 1.06E-114 | -0.13226 | 1.03E-37  | 1.88E-33  |
| ATP5O    | -0.354268263 | 1.71E-140 | 3.12E-136 | -0.20492 | 4.65E-62  | 8.48E-58  |
| ATP6V0B  | 0.158154502  | 4.44E-20  | 8.11E-16  | 0.250298 | 2.31E-60  | 4.21E-56  |
| ATP6V0E1 | 0.253021236  | 1.43E-69  | 2.60E-65  | 2.02E-01 | 6.61E-56  | 1.21E-51  |
| ATP6V1G1 | 0.356440025  | 2.06E-143 | 3.75E-139 | 4.37E-01 | 1.73E-191 | 3.15E-187 |
| ATPIF1   | -0.172431368 | 2.86E-36  | 5.22E-32  | -0.38303 | 4.18E-179 | 7.63E-175 |
| ATRAID   | -0.060894672 | 1.84E-05  | 3.37E-01  | -0.43285 | 4.95E-200 | 9.03E-196 |
| ATRNL1   | -0.445437016 | 1.42E-206 | 2.59E-202 | -0.42987 | 5.22E-260 | 9.53E-256 |
| B2M      | -0.677733435 | 0.00E+00  | 0.00E+00  | -0.86962 | 0         | 0         |
| BAALC    | 0.386405941  | 5.07E-95  | 9.25E-91  | 0.536672 | 3.75E-131 | 6.84E-127 |
| BAMBI    | 0.001226699  | 1.95E-02  | 1.00E+00  | -0.44419 | 7.16E-116 | 1.3E-111  |
| BEX2     | -0.276439393 | 2.55E-83  | 4.66E-79  | -0.28003 | 4.03E-98  | 7.36E-94  |
| BEX4     | -0.147808338 | 7.64E-28  | 1.39E-23  | -0.30838 | 1.63E-117 | 2.98E-113 |
| BGN      | -0.262315957 | 2.37E-93  | 4.32E-89  | -0.28996 | 8.45E-127 | 1.54E-122 |
| BHLHE40  | 0.545672004  | 2.06E-106 | 3.76E-102 | 0.70973  | 1.11E-226 | 2.03E-222 |
| BHLHE41  | -0.085668066 | 8.65E-10  | 1.58E-05  | -0.36344 | 1.46E-162 | 2.67E-158 |
| BMP2     | 0.804177334  | 1.47E-268 | 2.68E-264 | 0.828155 | 0         | 0         |
| BNIP3    | 0.261735351  | 1.63E-53  | 2.98E-49  | 0.199448 | 1.39E-48  | 2.53E-44  |
| BRK1     | -0.277301277 | 3.90E-110 | 7.11E-106 | -0.42734 | 1.86E-264 | 3.39E-260 |
| BSG      | -0.250477711 | 9.83E-73  | 1.79E-68  | -0.38986 | 5.37E-177 | 9.80E-173 |
| BTF3     | -0.395372955 | 1.29E-277 | 2.35E-273 | -0.33176 | 1.98E-246 | 3.61E-242 |
| BTG1     | 0.537765777  | 3.57E-202 | 6.51E-198 | 0.343597 | 8.21E-116 | 1.50E-111 |
| BTG3     | 0.190606173  | 4.93E-33  | 9.00E-29  | 0.324586 | 8.45E-117 | 1.54E-112 |
| BZW1     | 0.550532917  | 1.33E-185 | 2.43E-181 | 0.750769 | 0         | 0         |
| C10orf10 | 0.302770071  | 1.28E-34  | 2.34E-30  | -0.09743 | 5.718E-07 | 0.010434  |
| C11orf31 | 0.281188806  | 9.14E-80  | 1.67E-75  | 0.309476 | 3.07E-114 | 5.60E-110 |
| C11orf96 | 0.37649005   | 1.96E-99  | 3.58E-95  | 0.915627 | 0         | 0         |
| C12orf57 | -0.254024498 | 3.05E-99  | 5.56E-95  | -0.23663 | 7.86E-101 | 1.43E-96  |
| C14orf1  | -0.259998899 | 1.58E-76  | 2.89E-72  | -0.27384 | 7.85E-112 | 1.43E-107 |
| C15orf48 | 0.272177486  | 6.89E-47  | 1.26E-42  | 0.565112 | 2.99E-153 | 5.45E-149 |
| C19orf43 | -0.279473316 | 1.50E-98  | 2.74E-94  | -0.23828 | 2.28E-87  | 4.17E-83  |
| C1orf21  | -0.16354735  | 1.69E-31  | 3.08E-27  | -0.2972  | 7.55E-109 | 1.38E-104 |
| C1S      | 0.0050643    | 3.64E-01  | 1.00E+00  | -0.27177 | 4.952E-83 | 9.04E-79  |
| C2orf40  | 0.209268514  | 1.59E-06  | 2.90E-02  | -0.80392 | 0         | 0         |
| C2orf49  | 0.138206019  | 3.26E-27  | 5.96E-23  | 0.25093  | 3.56E-92  | 6.49E-88  |
| C2orf82  | -0.637108273 | 3.32E-218 | 6.06E-214 | -1.22501 | 0         | 0         |

|                 |              |           |           |
|-----------------|--------------|-----------|-----------|
| <b>C4orf48</b>  | 0.333726798  | 6.31E-102 | 1.15E-97  |
| <b>C6orf48</b>  | -0.253295849 | 1.58E-48  | 2.89E-44  |
| <b>C7orf73</b>  | 0.021609485  | 4.74E-06  | 8.64E-02  |
| <b>CA9</b>      | 0.573847564  | 3.30E-167 | 6.03E-163 |
| <b>CALM3</b>    | -0.215594521 | 6.60E-47  | 1.20E-42  |
| <b>CALR</b>     | -0.183506038 | 9.31E-17  | 1.70E-12  |
| <b>CANX</b>     | -0.095414107 | 1.31E-11  | 2.39E-07  |
| <b>CAPS</b>     | -1.010981402 | 0.00E+00  | 0         |
| <b>CAPZA2</b>   | 0.257756899  | 1.26E-58  | 2.29E-54  |
| <b>CCDC102B</b> | -0.552779497 | 0.00E+00  | 0.00E+00  |
| <b>CCDC8</b>    | -0.273445129 | 8.49E-112 | 1.55E-107 |
| <b>CCDC80</b>   | 0.33012088   | 1.06E-29  | 1.94E-25  |
| <b>CCDC85B</b>  | 0.90509136   | 1.33E-280 | 2.42E-276 |
| <b>CCDC88A</b>  | -0.157652237 | 2.56E-30  | 4.66E-26  |
| <b>CCL20</b>    | 0            | NA        | NA        |
| <b>CCND1</b>    | 0.264639775  | 4.74E-84  | 8.65E-80  |
| <b>CCNG1</b>    | -0.220716717 | 1.84E-52  | 3.36E-48  |
| <b>CCNG2</b>    | 0.269956889  | 3.20E-44  | 5.84E-40  |
| <b>CCNI</b>     | -0.62124171  | 0.00E+00  | 0.00E+00  |
| <b>CCT8</b>     | 0.110936367  | 2.22E-09  | 4.04E-05  |
| <b>CD320</b>    | -0.049616363 | 2.47E-04  | 1         |
| <b>CD44</b>     | 0.432968968  | 1.70E-154 | 3.11E-150 |
| <b>CD55</b>     | 0.34000849   | 6.76E-79  | 1.23E-74  |
| <b>CD63</b>     | -0.190533957 | 1.61E-47  | 2.94E-43  |
| <b>CD9</b>      | -0.576632467 | 1.62E-209 | 2.96E-205 |
| <b>CD99</b>     | -0.321060618 | 1.07E-141 | 1.96E-137 |
| <b>CDC37L1</b>  | 0.220069752  | 2.04E-49  | 3.71E-45  |
| <b>CDK5RAP2</b> | 0.312299946  | 7.72E-37  | 1.41E-32  |
| <b>CEBPD</b>    | -0.312331417 | 4.62E-49  | 8.44E-45  |
| <b>CFD</b>      | 0.468305237  | 2.31E-113 | 4.22E-109 |
| <b>CFH</b>      | -0.28708416  | 4.10E-40  | 7.48E-36  |
| <b>CHD2</b>     | 0.139974956  | 1.31E-14  | 2.39E-10  |
| <b>CHI3L1</b>   | 0.416970778  | 5.73E-58  | 1.04E-53  |
| <b>CHI3L2</b>   | 1.242716698  | 0         | 0         |
| <b>CHID1</b>    | -0.2771385   | 1.31E-73  | 2.39E-69  |
| <b>CHMP4B</b>   | 0.152752216  | 1.11E-19  | 2.02E-15  |
| <b>CHPT1</b>    | -0.178986308 | 1.04E-34  | 1.90E-30  |
| <b>CHRD12</b>   | -0.478539659 | 1.80E-106 | 3.28E-102 |
| <b>CITED2</b>   | -0.61830128  | 1.28E-194 | 2.33E-190 |

|          |           |           |
|----------|-----------|-----------|
| 0.181019 | 1.49E-46  | 2.72E-42  |
| -0.16477 | 2.04E-25  | 3.72E-21  |
| -0.27222 | 5.41E-126 | 9.88E-122 |
| 0.267099 | 1.76E-66  | 3.22E-62  |
| -0.26422 | 1.48E-79  | 2.71E-75  |
| -0.39138 | 1.14E-119 | 2.09E-115 |
| -0.28461 | 1.65E-98  | 3.01E-94  |
| -1.32832 | 0         | 0         |
| 0.283186 | 5.81E-82  | 1.06E-77  |
| -0.43519 | 0         | 0         |
| -0.23551 | 1.17E-134 | 2.14E-130 |
| -0.46874 | 3.66E-170 | 6.67E-166 |
| 0.684452 | 8.54E-255 | 1.56E-250 |
| -0.27069 | 7.20E-121 | 1.31E-116 |
| 0.505346 | 3.67E-83  | 6.70E-79  |
| 0.549957 | 3.07E-258 | 5.61E-254 |
| -0.39061 | 1.40E-187 | 2.55E-183 |
| 0.087943 | 1.53E-05  | 0.279731  |
| -0.5978  | 0         | 0         |
| 0.292136 | 4.68E-76  | 8.53E-72  |
| -0.30361 | 5.78E-114 | 1.05E-109 |
| 0.4654   | 4.22E-233 | 7.70E-229 |
| 0.993607 | 0         | 0         |
| -0.2634  | 4.21E-94  | 7.68E-90  |
| -0.61648 | 2.18E-283 | 3.98E-279 |
| -0.72987 | 0         | 0         |
| 0.280352 | 5.84E-80  | 1.07E-75  |
| 0.092342 | 7.87E-05  | 1         |
| -0.6641  | 3.07E-250 | 5.60E-246 |
| 0        | NA        | NA        |
| -0.3546  | 3.00E-64  | 5.47E-60  |
| 0.250606 | 1.48E-38  | 2.71E-34  |
| -0.49678 | 1.63E-82  | 2.97E-78  |
| 0.518394 | 1.35E-81  | 2.46E-77  |
| -0.42356 | 1.26E-198 | 2.30E-194 |
| 0.27108  | 5.39E-74  | 9.84E-70  |
| -0.25872 | 6.08E-76  | 1.11E-71  |
| -0.42287 | 7.28E-146 | 1.33E-141 |
| -0.74605 | 0         | 0         |

|              |              |           |           |
|--------------|--------------|-----------|-----------|
| CKAP4        | -0.269859021 | 1.37E-65  | 2.51E-61  |
| CLDND1       | 0.304492273  | 4.29E-99  | 7.84E-95  |
| CLEC2B       | 0.238602568  | 3.98E-26  | 7.27E-22  |
| CLEC3A       | -1.101842308 | 0         | 0         |
| CLK1         | 0.361879422  | 5.03E-103 | 9.18E-99  |
| CMB9-22P13.1 | -0.22372045  | 5.47E-47  | 9.98E-43  |
| CMPK1        | -0.074179299 | 5.68E-09  | 0.000104  |
| CNIH1        | 0.191873189  | 4.39E-38  | 8.01E-34  |
| COL11A1      | -0.078043876 | 7.36E-25  | 1.34E-20  |
| COL11A2      | -0.062861466 | 4.47E-07  | 0.008156  |
| COL1A1       | 0            | NA        | NA        |
| COL2A1       | -0.812915384 | 9.33E-187 | 1.70E-182 |
| COL5A2       | -0.274405993 | 2.59E-33  | 4.73E-29  |
| COL9A2       | -0.065094935 | 1.38E-09  | 2.51E-05  |
| COL9A3       | -0.339422645 | 4.13E-73  | 7.54E-69  |
| COMMD6       | -0.311252765 | 1.55E-189 | 2.83E-185 |
| COMP         | 1.198002554  | 0         | 0         |
| COX17        | 0.346679387  | 4.24E-111 | 7.74E-107 |
| COX7A2       | 0.142240428  | 8.74E-40  | 1.60E-35  |
| COX7C        | -0.266719328 | 4.12E-152 | 7.52E-148 |
| CP           | -0.370041985 | 5.01E-138 | 9.14E-134 |
| CPE          | -0.30556084  | 3.50E-80  | 6.39E-76  |
| CREG1        | -0.205893105 | 1.25E-40  | 2.27E-36  |
| CRIP2        | -0.484322769 | 1.12E-166 | 2.04E-162 |
| CRISPLD1     | -0.905225098 | 9.46E-275 | 1.73E-270 |
| CRLF1        | 0.282360545  | 1.76E-86  | 3.21E-82  |
| CRTAC1       | 0.364271752  | 6.34E-119 | 1.16E-114 |
| CRTAP        | -0.737970474 | 0         | 0         |
| CRYAB        | -0.353058867 | 1.22E-47  | 2.23E-43  |
| CSGALNACT2   | 0.280733673  | 2.22E-66  | 4.04E-62  |
| CST3         | -0.223397466 | 7.27E-54  | 1.33E-49  |
| CTGF         | -0.866074275 | 7.15E-134 | 1.30E-129 |
| CTHRC1       | 0.843182592  | 0         | 0         |
| CTNNB1       | 0.386522095  | 5.54E-48  | 1.01E-43  |
| CTSC         | -0.321659155 | 3.81E-39  | 6.96E-35  |
| CTSD         | 0.798865369  | 3.20E-129 | 5.84E-125 |
| CTSK         | -0.213986806 | 1.64E-58  | 2.99E-54  |
| CTSL         | 0.757536233  | 7.88E-102 | 1.44E-97  |

|          |           |           |
|----------|-----------|-----------|
| -0.26501 | 6.54E-92  | 1.19E-87  |
| 0.311427 | 3.73E-113 | 6.81E-109 |
| 0.406686 | 2.77E-70  | 5.06E-66  |
| -1.80123 | 0         | 0         |
| 0.381247 | 9.97E-129 | 1.82E-124 |
| -0.33944 | 2.66E-134 | 4.85E-130 |
| -0.27267 | 5.39E-103 | 9.84E-99  |
| 0.295286 | 6.35E-95  | 1.16E-90  |
| -0.63755 | 0         | 0         |
| -0.49439 | 6.24E-205 | 1.14E-200 |
| 0.550273 | 4.91E-38  | 8.96E-34  |
| -1.36708 | 0         | 0         |
| -0.32683 | 7.34E-92  | 1.34E-87  |
| -0.38549 | 4.85E-154 | 8.84E-150 |
| -0.9621  | 0         | 0         |
| -0.31465 | 9.32E-232 | 1.70E-227 |
| 1.23287  | 0         | 0         |
| 0.41746  | 6.41E-177 | 1.17E-172 |
| 0.325129 | 2.35E-202 | 4.29E-198 |
| -0.14659 | 2.35E-64  | 4.28E-60  |
| -0.76308 | 0         | 0         |
| -0.32012 | 4.56E-96  | 8.32E-92  |
| -0.34075 | 3.61E-136 | 6.59E-132 |
| -0.40384 | 3.84E-160 | 7.01E-156 |
| -0.79239 | 0         | 0         |
| 0.373145 | 1.82E-140 | 3.32E-136 |
| 0.3038   | 2.46E-106 | 4.49E-102 |
| -0.67345 | 0         | 0         |
| -0.33924 | 1.32E-75  | 2.41E-71  |
| 0.450878 | 1.07E-208 | 1.95E-204 |
| -0.71614 | 0         | 0         |
| -0.7487  | 5.81E-104 | 1.06E-99  |
| 0.7076   | 4.49E-247 | 8.19E-243 |
| 0.515906 | 2.11E-89  | 3.85E-85  |
| -0.50056 | 1.78E-143 | 3.25E-139 |
| -0.42878 | 1.37E-195 | 2.50E-191 |
| -0.32788 | 4.41E-186 | 8.05E-182 |
| 1.251541 | 0         | 0         |

|        |              |           |           |
|--------|--------------|-----------|-----------|
| CUTA   | -0.2567633   | 6.16E-74  | 1.12E-69  |
| CXCL8  | 0            | NA        | NA        |
| CXXC5  | -0.363800126 | 4.75E-110 | 8.66E-106 |
| CYBRD1 | -0.308054    | 9.48E-95  | 1.73E-90  |
| CYP1B1 | 0.378808849  | 1.31E-21  | 2.39E-17  |
| CYR61  | -0.617464094 | 8.29E-123 | 1.51E-118 |
| CYSTM1 | -0.279761208 | 4.34E-73  | 7.91E-69  |
| CYTL1  | 0.349312952  | 2.27E-61  | 4.14E-57  |
| DBP    | -0.302270841 | 6.84E-86  | 1.25E-81  |
| DCN    | -0.227907345 | 4.10E-63  | 7.49E-59  |
| DDIT3  | 0.483737221  | 2.19E-114 | 4.00E-110 |
| DDIT4  | 0.13068525   | 7.77E-17  | 1.42E-12  |
| DDIT4L | 0.794520392  | 2.05E-266 | 3.73E-262 |
| DDOST  | -0.153807269 | 9.44E-22  | 1.72E-17  |
| DDR2   | -0.287904719 | 2.61E-64  | 4.76E-60  |
| DMKN   | -0.303592155 | 1.32E-100 | 2.40E-96  |
| DNAJB1 | 0.150315439  | 7.67E-09  | 0.00014   |
| DNAJB9 | 0.404172612  | 5.68E-88  | 1.04E-83  |
| DNER   | 0.342563303  | 3.47E-70  | 6.33E-66  |
| DNM3OS | -0.297344125 | 2.94E-78  | 5.37E-74  |
| DSEL   | -0.302288723 | 8.07E-79  | 1.47E-74  |
| DUSP1  | 0.004863469  | 0.004482  | 1         |
| EBPL   | -0.208066468 | 1.22E-51  | 2.22E-47  |
| EDF1   | -0.273561081 | 1.33E-127 | 2.44E-123 |
| EEF1A1 | -0.665422984 | 0         | 0         |
| EEF1B2 | -0.503276276 | 0         | 0         |
| EEF2   | -0.631231384 | 0         | 0         |
| EFNA1  | -0.163478827 | 1.60E-32  | 2.92E-28  |
| EGLN3  | 0.483817658  | 7.66E-139 | 1.40E-134 |
| EGR1   | 0.383555074  | 7.02E-54  | 1.28E-49  |
| EID1   | -0.336486583 | 2.04E-166 | 3.72E-162 |
| EIF1   | -0.023088268 | 0.047079  | 1         |
| EIF1B  | 0.198592273  | 2.20E-36  | 4.02E-32  |
| EIF2A  | -0.360150702 | 6.31E-113 | 1.15E-108 |
| EIF2S3 | -0.252045148 | 5.22E-59  | 9.52E-55  |
| EIF3D  | -0.32443765  | 6.96E-96  | 1.27E-91  |
| EIF3E  | -0.242266542 | 1.26E-81  | 2.31E-77  |
| EIF3F  | -0.291056917 | 2.18E-98  | 3.99E-94  |
| EIF3H  | -0.831105398 | 0         | 0         |

|          |           |           |
|----------|-----------|-----------|
| -0.34505 | 3.99E-155 | 7.28E-151 |
| 0.889855 | 1.03E-151 | 1.89E-147 |
| -0.50595 | 9.91E-284 | 1.81E-279 |
| -0.34063 | 6.85E-140 | 1.25E-135 |
| 0.078351 | 0.412547  | 1         |
| -0.61439 | 5.76E-185 | 1.05E-180 |
| -0.11654 | 1.28E-18  | 2.33E-14  |
| 0.057582 | 2.64E-06  | 0.048214  |
| -0.34735 | 4.65E-176 | 8.48E-172 |
| -0.75614 | 0         | 0         |
| 0.435109 | 1.15E-123 | 2.10E-119 |
| -0.31586 | 4.79E-65  | 8.75E-61  |
| 0.840644 | 3.44E-282 | 6.27E-278 |
| -0.26382 | 8.64E-81  | 1.58E-76  |
| -0.53247 | 9.04E-283 | 1.65E-278 |
| -0.33869 | 1.37E-154 | 2.50E-150 |
| 0.380069 | 1.50E-60  | 2.73E-56  |
| 0.488258 | 6.00E-145 | 1.10E-140 |
| 0.494635 | 8.02E-176 | 1.46E-171 |
| -0.49211 | 2.74E-234 | 5.00E-230 |
| -0.22789 | 1.40E-92  | 2.56E-88  |
| -0.3847  | 3.12E-124 | 5.69E-120 |
| -0.28165 | 1.22E-120 | 2.22E-116 |
| -0.18484 | 1.61E-78  | 2.94E-74  |
| -0.86024 | 0         | 0         |
| -0.437   | 0         | 0         |
| -0.81748 | 0         | 0         |
| -0.32363 | 4.61E-133 | 8.42E-129 |
| 0.1368   | 1.97E-16  | 3.60E-12  |
| -0.01361 | 0.0123146 | 1         |
| -0.58167 | 0         | 0         |
| 0.488611 | 0         | 0         |
| 0.387931 | 1.40E-154 | 2.55E-150 |
| -0.28251 | 1.92E-79  | 3.50E-75  |
| -0.28277 | 6.09E-75  | 1.11E-70  |
| -0.27212 | 5.63E-83  | 1.03E-78  |
| -0.26691 | 3.28E-98  | 5.99E-94  |
| -0.17517 | 1.00E-44  | 1.83E-40  |
| -0.7591  | 0         | 0         |

|                 |              |           |           |
|-----------------|--------------|-----------|-----------|
| <b>EIF3K</b>    | -0.351774765 | 1.96E-145 | 3.58E-141 |
| <b>EIF3L</b>    | -0.540784852 | 1.26E-306 | 2.30E-302 |
| <b>EIF3M</b>    | -0.252648717 | 7.12E-65  | 1.30E-60  |
| <b>EIF4A2</b>   | 0.270111092  | 2.79E-69  | 5.08E-65  |
| <b>EIF4B</b>    | -0.530532656 | 2.35E-229 | 4.28E-225 |
| <b>EIF4EBP1</b> | 0.24911843   | 1.34E-35  | 2.45E-31  |
| <b>EIF5</b>     | 0.046800612  | 0.008275  | 1         |
| <b>EMP3</b>     | 0.339230826  | 5.37E-97  | 9.80E-93  |
| <b>ENAH</b>     | -0.174032587 | 1.91E-38  | 3.49E-34  |
| <b>ENO1</b>     | 0.260547029  | 1.05E-24  | 1.91E-20  |
| <b>ENO2</b>     | 0.559899514  | 1.41E-181 | 2.57E-177 |
| <b>ENPP1</b>    | -0.276526369 | 2.44E-92  | 4.46E-88  |
| <b>EPS8</b>     | 0.302613612  | 3.03E-83  | 5.53E-79  |
| <b>EPYC</b>     | 0.805758755  | 1.78E-174 | 3.25E-170 |
| <b>ERGIC3</b>   | -0.346893494 | 2.14E-128 | 3.90E-124 |
| <b>ERO1A</b>    | 0.717084589  | 1.07E-230 | 1.95E-226 |
| <b>ERP29</b>    | -0.206806241 | 5.32E-47  | 9.70E-43  |
| <b>ERRFI1</b>   | 0.388005596  | 1.09E-72  | 1.99E-68  |
| <b>ESD</b>      | 0.060474646  | 0.584716  | 1         |
| <b>EVI2A</b>    | 0.306739564  | 1.23E-124 | 2.25E-120 |
| <b>FABP5</b>    | 0.514626255  | 6.73E-17  | 1.23E-12  |
| <b>FAM162A</b>  | 0.493578667  | 1.32E-185 | 2.41E-181 |
| <b>FAM46A</b>   | -0.109896446 | 1.47E-05  | 0.26827   |
| <b>FAP</b>      | 0.165360643  | 1.72E-35  | 3.14E-31  |
| <b>FBXO2</b>    | -0.412630374 | 6.62E-144 | 1.21E-139 |
| <b>FCGRT</b>    | -0.240092081 | 6.75E-55  | 1.23E-50  |
| <b>FGFBP2</b>   | 0.065406456  | 1.25E-06  | 0.022786  |
| <b>FHL1</b>     | -0.550626366 | 1.39E-149 | 2.54E-145 |
| <b>FHL2</b>     | 0.013595601  | 0.021966  | 1         |
| <b>FIS1</b>     | -0.165946965 | 1.40E-30  | 2.56E-26  |
| <b>FKBP10</b>   | -0.148985161 | 1.95E-20  | 3.55E-16  |
| <b>FMOD</b>     | -0.262846734 | 2.45E-80  | 4.47E-76  |
| <b>FN1</b>      | 0.701163854  | 0         | 0         |
| <b>FNIP2</b>    | 0.045987076  | 7.24E-05  | 1         |
| <b>FOS</b>      | -0.039445246 | 3.81E-09  | 6.95E-05  |
| <b>FOSL1</b>    | 0.679148411  | 1.08E-205 | 1.98E-201 |
| <b>FRZB</b>     | -1.838581404 | 0         | 0         |
| <b>FTH1</b>     | -0.700432726 | 0         | 0         |
| <b>FTL</b>      | -0.259786279 | 4.53E-142 | 8.26E-138 |

|          |           |           |
|----------|-----------|-----------|
| -0.2129  | 2.32E-77  | 4.24E-73  |
| -0.59001 | 0         | 0         |
| -0.09439 | 5.68E-13  | 1.04E-08  |
| 0.427465 | 7.98E-207 | 1.46E-202 |
| -0.48024 | 9.40E-238 | 1.72E-233 |
| 0.371279 | 9.68E-89  | 1.77E-84  |
| 0.292287 | 4.33E-90  | 7.90E-86  |
| 0.399299 | 8.28E-147 | 1.51E-142 |
| -0.38046 | 3.64E-205 | 6.64E-201 |
| 0.348543 | 3.41E-84  | 6.23E-80  |
| 0.52463  | 4.74E-248 | 8.64E-244 |
| -0.13934 | 3.11E-128 | 5.67E-124 |
| 0.389791 | 8.03E-176 | 1.47E-171 |
| -0.05459 | 7.04E-09  | 0.000128  |
| -0.41541 | 3.65E-211 | 6.66E-207 |
| 0.794649 | 0         | 0         |
| -0.25923 | 4.38E-88  | 8.00E-84  |
| 0.318599 | 1.66E-59  | 3.03E-55  |
| 0.256515 | 2.38E-38  | 4.35E-34  |
| 0.363436 | 1.10E-196 | 2.01E-192 |
| 0.396332 | 9.24E-26  | 1.69E-21  |
| 0.350376 | 5.58E-124 | 1.02E-119 |
| -0.44166 | 1.33E-125 | 2.43E-121 |
| 0.423061 | 8.90E-211 | 1.62E-206 |
| -0.81174 | 0         | 0         |
| -0.44205 | 1.02E-199 | 1.86E-195 |
| -0.37073 | 2.00E-61  | 3.65E-57  |
| -0.50738 | 2.55E-187 | 4.65E-183 |
| 0.281161 | 1.67E-99  | 3.05E-95  |
| -0.27279 | 8.93E-97  | 1.63E-92  |
| -0.30353 | 4.69E-93  | 8.56E-89  |
| -0.64325 | 0         | 0         |
| 0.864219 | 0         | 0         |
| 0.343229 | 2.22E-112 | 4.05E-108 |
| -0.58727 | 1.35E-274 | 2.47E-270 |
| 0.447072 | 4.21E-208 | 7.68E-204 |
| -1.73719 | 0         | 0         |
| -0.64642 | 0         | 0         |
| -0.52324 | 0         | 0         |

|                   |              |           |           |
|-------------------|--------------|-----------|-----------|
| <b>FXYD1</b>      | 0.020384998  | 3.86E-05  | 0.705024  |
| <b>FXYD6</b>      | -0.259850564 | 8.03E-90  | 1.47E-85  |
| <b>G0S2</b>       | 0.912798042  | 7.39E-55  | 1.35E-50  |
| <b>GADD45B</b>    | -0.232659873 | 1.25E-32  | 2.29E-28  |
| <b>GADD45GIP1</b> | 0.103133193  | 1.41E-11  | 2.58E-07  |
| <b>GAPDH</b>      | 0.372905986  | 3.47E-64  | 6.33E-60  |
| <b>GAS6</b>       | -0.43085833  | 4.12E-143 | 7.52E-139 |
| <b>GBE1</b>       | 0.423336832  | 5.79E-83  | 1.06E-78  |
| <b>GDF15</b>      | 0.182630224  | 2.34E-31  | 4.27E-27  |
| <b>GJA1</b>       | 0.151401637  | 7.56E-40  | 1.38E-35  |
| <b>GLTSCR2</b>    | -0.300356046 | 7.23E-106 | 1.32E-101 |
| <b>GNAS</b>       | -0.414733817 | 1.08E-161 | 1.96E-157 |
| <b>GOLIM4</b>     | -0.079304106 | 3.70E-17  | 6.75E-13  |
| <b>GOLT1B</b>     | 0.295756127  | 4.97E-77  | 9.06E-73  |
| <b>GPAA1</b>      | -0.172034437 | 9.80E-33  | 1.79E-28  |
| <b>GPRC5A</b>     | 0.256538167  | 1.08E-81  | 1.97E-77  |
| <b>GPX1</b>       | 0.305472938  | 2.09E-79  | 3.81E-75  |
| <b>GPX3</b>       | -0.552780703 | 5.68E-225 | 1.04E-220 |
| <b>GRB10</b>      | 0.242653477  | 5.66E-89  | 1.03E-84  |
| <b>GREM1</b>      | -0.52166636  | 1.43E-103 | 2.61E-99  |
| <b>GRN</b>        | -0.126044847 | 4.41E-34  | 8.04E-30  |
| <b>GSN</b>        | -0.163429737 | 1.64E-24  | 2.99E-20  |
| <b>GSTA4</b>      | -0.142989052 | 9.09E-31  | 1.66E-26  |
| <b>GSTO1</b>      | 0.135302748  | 1.69E-11  | 3.08E-07  |
| <b>GSTP1</b>      | -0.300744354 | 3.12E-120 | 5.69E-116 |
| <b>H1FX</b>       | -0.22970855  | 5.18E-61  | 9.45E-57  |
| <b>H3F3A</b>      | -0.475573049 | 1.80E-289 | 3.29E-285 |
| <b>HADHA</b>      | -0.238829042 | 1.37E-61  | 2.50E-57  |
| <b>HDLBP</b>      | -0.416852472 | 3.47E-139 | 6.33E-135 |
| <b>HERPUD1</b>    | -0.307291011 | 8.63E-79  | 1.57E-74  |
| <b>HEXB</b>       | -0.193757668 | 4.74E-31  | 8.66E-27  |
| <b>HIF1A</b>      | 0.251163061  | 2.92E-39  | 5.32E-35  |
| <b>HILPDA</b>     | 0.620157536  | 1.07E-161 | 1.95E-157 |
| <b>HINT1</b>      | -0.460551505 | 5.37E-308 | 9.79E-304 |
| <b>HIST1H1C</b>   | -0.608653279 | 8.25E-140 | 1.51E-135 |
| <b>HIST1H4C</b>   | -0.379684761 | 3.55E-129 | 6.49E-125 |
| <b>HLA-A</b>      | -0.421367417 | 6.84E-140 | 1.25E-135 |
| <b>HLA-B</b>      | -0.433264205 | 2.56E-143 | 4.67E-139 |
| <b>HLA-C</b>      | -0.473123052 | 9.16E-176 | 1.67E-171 |

|          |           |           |
|----------|-----------|-----------|
| -0.29932 | 6.93E-74  | 1.27E-69  |
| -0.66714 | 0         | 0         |
| 0.650508 | 3.29E-30  | 6.00E-26  |
| -0.27765 | 1.34E-79  | 2.45E-75  |
| 0.284097 | 3.56E-101 | 6.49E-97  |
| 0.056261 | 1.61E-06  | 0.029302  |
| -0.50619 | 3.06E-274 | 5.59E-270 |
| 0.478605 | 5.33E-139 | 9.73E-135 |
| 0.275085 | 2.22E-72  | 4.04E-68  |
| 0.350957 | 5.51E-144 | 1.01E-139 |
| -0.29294 | 4.65E-118 | 8.48E-114 |
| -0.39978 | 4.37E-188 | 7.98E-184 |
| -0.37367 | 6.36E-99  | 1.16E-94  |
| 0.437263 | 2.62E-175 | 4.78E-171 |
| -0.25191 | 2.42E-100 | 4.42E-96  |
| 0.323618 | 2.18E-156 | 3.98E-152 |
| 0.369747 | 3.28E-138 | 5.99E-134 |
| -0.81213 | 0         | 0         |
| 0.379731 | 2.56E-232 | 4.68E-228 |
| -0.446   | 1.33E-157 | 2.44E-153 |
| -0.3564  | 2.47E-185 | 4.51E-181 |
| -0.45228 | 1.10E-190 | 2.01E-186 |
| -0.28407 | 1.90E-133 | 3.47E-129 |
| 0.601756 | 4.20E-290 | 7.67E-286 |
| -0.27934 | 1.36E-111 | 2.48E-107 |
| -0.28598 | 2.48E-110 | 4.52E-106 |
| -0.50736 | 0         | 0         |
| -0.25901 | 1.50E-100 | 2.73E-96  |
| -0.39985 | 9.52E-175 | 1.74E-170 |
| -0.29942 | 1.28E-103 | 2.34E-99  |
| -0.3337  | 1.24E-115 | 2.26E-111 |
| -0.0147  | 2.13E-05  | 0.389002  |
| 0.325549 | 4.78E-40  | 8.72E-36  |
| -0.2434  | 1.51E-134 | 2.75E-130 |
| -0.33284 | 3.81E-60  | 6.95E-56  |
| -0.13015 | 7.89E-155 | 1.44E-150 |
| -0.4498  | 4.85E-175 | 8.84E-171 |
| -0.32255 | 1.75E-85  | 3.20E-81  |
| -0.46337 | 1.09E-179 | 1.99E-175 |

|          |              |           |           |          |           |           |
|----------|--------------|-----------|-----------|----------|-----------|-----------|
| HLA-DRB1 | 0.463897887  | 3.15E-143 | 5.75E-139 | 0.500159 | 1.56E-239 | 2.85E-235 |
| HMGA1    | 0.388423289  | 1.61E-53  | 2.94E-49  | 1.129443 | 0         | 0         |
| HMGA2    | 0.280445332  | 1.12E-149 | 2.04E-145 | 0.441018 | 0         | 0         |
| HMG2N    | -0.253702472 | 2.43E-89  | 4.43E-85  | -0.37878 | 1.69E-243 | 3.09E-239 |
| HMG2N3   | -0.132278861 | 1.30E-25  | 2.38E-21  | -0.28122 | 1.21E-136 | 2.21E-132 |
| HNRNPA1  | -0.452287252 | 2.26E-253 | 4.13E-249 | -0.5943  | 0         | 0         |
| HOXB6    | -0.256334854 | 6.78E-69  | 1.24E-64  | -0.21712 | 3.76E-60  | 6.86E-56  |
| HOXB8    | -0.238580197 | 2.63E-99  | 4.80E-95  | -0.27475 | 6.17E-186 | 1.13E-181 |
| HOXC10   | -0.380329177 | 1.46E-123 | 2.66E-119 | -0.24942 | 8.71E-64  | 1.59E-59  |
| HSP90AB1 | -0.316062883 | 9.46E-95  | 1.73E-90  | -0.32803 | 3.66E-147 | 6.68E-143 |
| HSP90B1  | -0.114985285 | 1.27E-06  | 0.023208  | -0.34244 | 8.13E-93  | 1.48E-88  |
| HSPA8    | -0.221835645 | 4.70E-41  | 8.57E-37  | -0.2662  | 2.32E-65  | 4.24E-61  |
| HSPB1    | -0.301633343 | 4.75E-74  | 8.66E-70  | -0.36405 | 2.74E-134 | 5.01E-130 |
| HTRA1    | -0.083361814 | 2.55E-14  | 4.65E-10  | -0.45086 | 7.02E-253 | 1.28E-248 |
| ID1      | -0.428335671 | 1.99E-55  | 3.62E-51  | -0.95704 | 0         | 0         |
| ID2      | -0.340493964 | 1.68E-40  | 3.07E-36  | -0.76025 | 9.76E-292 | 1.78E-287 |
| ID3      | -0.324858919 | 4.90E-90  | 8.93E-86  | -1.009   | 0         | 0         |
| ID4      | -0.283779068 | 1.47E-57  | 2.69E-53  | -0.64784 | 5.08E-289 | 9.27E-285 |
| IER2     | -0.041602381 | 1.48E-11  | 2.71E-07  | -0.30538 | 8.18E-92  | 1.49E-87  |
| IER3     | 0.261771782  | 1.12E-39  | 2.05E-35  | 0.536152 | 6.13E-139 | 1.12E-134 |
| IFI27L2  | -0.227645139 | 5.58E-64  | 1.02E-59  | -0.26469 | 2.75E-98  | 5.02E-94  |
| IFITM2   | -0.091965467 | 5.23E-09  | 9.55E-05  | -0.26793 | 2.07E-77  | 3.77E-73  |
| IFRD1    | 0.384678343  | 1.01E-95  | 1.84E-91  | 0.345254 | 6.79E-83  | 1.24E-78  |
| IGBP1    | -0.259591499 | 1.00E-58  | 1.82E-54  | -0.15853 | 2.04E-26  | 3.72E-22  |
| IGFBP3   | 0.726318985  | 7.53E-184 | 1.37E-179 | 1.185738 | 0         | 0         |
| IGFBP5   | 0.527778205  | 7.46E-115 | 1.36E-110 | 0.282887 | 1.39E-21  | 2.54E-17  |
| IGFBP6   | -0.268792833 | 1.63E-44  | 2.97E-40  | -0.74637 | 1.01E-237 | 1.85E-233 |
| IGFBP7   | -0.239182436 | 6.63E-29  | 1.21E-24  | -0.45524 | 3.46E-155 | 6.31E-151 |
| IL11     | 0.374415286  | 5.45E-104 | 9.94E-100 | 0.64615  | 1.18E-171 | 2.15E-167 |
| ILF3-AS1 | -0.255671861 | 3.68E-77  | 6.71E-73  | -0.3325  | 6.09E-158 | 1.11E-153 |
| INHBA    | -0.344140632 | 1.05E-90  | 1.91E-86  | -0.47236 | 2.95E-219 | 5.38E-215 |
| INSIG1   | -0.318837875 | 5.94E-39  | 1.08E-34  | -0.26384 | 1.83E-40  | 3.34E-36  |
| INSIG2   | 0.365054518  | 4.90E-66  | 8.95E-62  | 0.116902 | 3.62E-06  | 0.066035  |
| ISG20    | 0.43537636   | 2.79E-110 | 5.09E-106 | 0.575614 | 1.33E-239 | 2.43E-235 |
| ISLR     | -0.643902092 | 4.44E-246 | 8.11E-242 | -0.81498 | 0         | 0         |
| ISM1     | -0.24300764  | 4.75E-84  | 8.67E-80  | -0.25457 | 1.61E-155 | 2.93E-151 |
| ITM2A    | -0.404370438 | 1.12E-108 | 2.03E-104 | -0.57602 | 1.23E-254 | 2.24E-250 |
| ITM2B    | 0.076385364  | 0.211905  | 1         | -0.32983 | 2.73E-123 | 4.98E-119 |
| ITM2C    | -0.306435229 | 1.59E-67  | 2.89E-63  | -0.71269 | 0         | 0         |



|           |              |           |           |          |           |           |
|-----------|--------------|-----------|-----------|----------|-----------|-----------|
| JUNB      | 0.039095944  | 1.43E-06  | 0.026066  | -0.55778 | 6.09E-224 | 1.11E-219 |
| KDELR2    | -0.279442088 | 3.67E-76  | 6.69E-72  | -0.32364 | 3.57E-140 | 6.52E-136 |
| KDELR3    | -0.193870739 | 2.63E-50  | 4.80E-46  | -0.29861 | 7.66E-130 | 1.40E-125 |
| KDM7A     | 0.165116696  | 3.52E-53  | 6.42E-49  | 0.253656 | 1.09E-126 | 1.98E-122 |
| KHDRBS3   | -0.30551581  | 2.35E-161 | 4.29E-157 | -0.21711 | 9.90E-116 | 1.81E-111 |
| KLF3      | 0.23603232   | 7.49E-33  | 1.37E-28  | 0.379022 | 1.86E-90  | 3.40E-86  |
| KMT2E-AS1 | 0.135697875  | 2.92E-41  | 5.33E-37  | 0.265346 | 3.07E-87  | 5.61E-83  |
| KRT8      | -0.264177346 | 4.26E-67  | 7.77E-63  | -0.21267 | 1.75E-59  | 3.19E-55  |
| LDHB      | -0.34888117  | 5.70E-128 | 1.04E-123 | -0.34823 | 3.75E-151 | 6.84E-147 |
| LECT1     | -0.336815455 | 1.46E-64  | 2.66E-60  | -1.01953 | 0         | 0         |
| LGALS1    | -0.335409178 | 2.88E-53  | 5.26E-49  | 0.120207 | 0.9493502 | 1         |
| LINC00152 | 0.05949318   | 0.030501  | 1         | 0.414252 | 2.55E-83  | 4.66E-79  |
| LINC00493 | 0.082543339  | 3.72E-08  | 0.000679  | 0.289634 | 9.95E-105 | 1.82E-100 |
| LINC01503 | -0.324963244 | 6.06E-54  | 1.11E-49  | -0.34435 | 5.78E-103 | 1.05E-98  |
| LITAF     | -0.285594293 | 9.93E-83  | 1.81E-78  | -0.34747 | 3.79E-145 | 6.92E-141 |
| LRPAP1    | -0.070674363 | 2.39E-07  | 0.004361  | -0.35162 | 8.91E-126 | 1.63E-121 |
| LRRC2     | -0.306582053 | 3.24E-112 | 5.92E-108 | -0.28383 | 6.22E-147 | 1.13E-142 |
| LTBP1     | 0.272063035  | 1.78E-138 | 3.26E-134 | 0.334075 | 9.42E-203 | 1.72E-198 |
| LUC7L3    | -0.17876329  | 4.82E-37  | 8.79E-33  | -0.266   | 5.75E-102 | 1.05E-97  |
| MAGED1    | -0.453063413 | 1.15E-79  | 2.10E-75  | -0.48345 | 4.98E-158 | 9.09E-154 |
| MALAT1    | -0.345618927 | 1.67E-109 | 3.05E-105 | -0.61874 | 0         | 0         |
| MDFI      | -0.212544412 | 1.29E-43  | 2.35E-39  | -0.51144 | 8.91E-249 | 1.63E-244 |
| MED21     | 0.301386268  | 4.01E-78  | 7.32E-74  | 0.370046 | 5.14E-108 | 9.38E-104 |
| MEG3      | -0.279160677 | 4.57E-41  | 8.34E-37  | -0.32886 | 1.51E-83  | 2.76E-79  |
| METAP2    | 0.236448491  | 1.10E-54  | 2.01E-50  | 0.291276 | 2.25E-98  | 4.10E-94  |
| MFGE8     | -0.176097089 | 9.60E-24  | 1.75E-19  | -0.41084 | 6.72E-137 | 1.23E-132 |
| MGP       | -0.431110363 | 1.55E-115 | 2.82E-111 | -1.02934 | 0         | 0         |
| MGST1     | 0.262566951  | 7.04E-60  | 1.28E-55  | 0.242936 | 7.31E-44  | 1.33E-39  |
| MIA       | -0.291775154 | 5.43E-54  | 9.91E-50  | -0.5882  | 2.49E-248 | 4.54E-244 |
| MIF       | 0.297741047  | 1.53E-154 | 2.80E-150 | 0.731694 | 0         | 0         |
| MIR99AHG  | -0.187881633 | 7.93E-62  | 1.45E-57  | -0.25621 | 6.37E-158 | 1.16E-153 |
| MKX       | -0.217517028 | 4.60E-54  | 8.40E-50  | -0.32263 | 2.65E-166 | 4.84E-162 |
| MMP3      | 0.392312277  | 5.71E-63  | 1.04E-58  | 0.679387 | 3.41E-109 | 6.23E-105 |
| MORF4L2   | -0.12978875  | 2.14E-20  | 3.91E-16  | -0.34713 | 3.09E-133 | 5.64E-129 |
| MOXD1     | -0.395904977 | 1.71E-138 | 3.12E-134 | -0.37415 | 2.89E-155 | 5.27E-151 |
| MPP6      | -0.291827045 | 5.39E-116 | 9.83E-112 | -0.26567 | 7.33E-118 | 1.34E-113 |
| MRPS6     | 0.772335405  | 1.83E-126 | 3.34E-122 | 0.79218  | 3.19E-213 | 5.82E-209 |
| MSANTD3   | 0.195122215  | 3.29E-54  | 6.00E-50  | 0.291504 | 1.11E-115 | 2.03E-111 |
| MSMO1     | -0.226384949 | 8.53E-27  | 1.56E-22  | -0.25512 | 5.81E-55  | 1.06E-50  |

|         |              |           |           |          |           |           |
|---------|--------------|-----------|-----------|----------|-----------|-----------|
| MSMP    | -0.722180457 | 1.56E-73  | 2.84E-69  | -0.79703 | 1.67E-82  | 3.05E-78  |
| MT-ATP6 | -0.839727465 | 3.61E-278 | 6.59E-274 | -0.87972 | 0         | 0         |
| MT-CO1  | -0.856561051 | 1.04E-275 | 1.90E-271 | -0.73119 | 1.61E-273 | 2.93E-269 |
| MT-CO2  | -0.738865014 | 1.15E-238 | 2.09E-234 | -0.75754 | 0         | 0         |
| MT-CO3  | -0.820046739 | 3.31E-260 | 6.05E-256 | -0.73769 | 4.47E-303 | 8.15E-299 |
| MT-CYB  | -0.991686987 | 0         | 0         | -0.89712 | 0         | 0         |
| MT-ND1  | -0.758908781 | 1.46E-255 | 2.67E-251 | -0.78626 | 0         | 0         |
| MT-ND2  | -0.952916953 | 7.72E-303 | 1.41E-298 | -0.93057 | 0         | 0         |
| MT-ND3  | -1.040498693 | 0         | 0         | -0.84782 | 0         | 0         |
| MT-ND4  | -0.594189094 | 1.27E-189 | 2.31E-185 | -0.49082 | 8.63E-171 | 1.57E-166 |
| MT-ND5  | -0.32805583  | 3.32E-57  | 6.05E-53  | -0.37088 | 2.43E-99  | 4.43E-95  |
| MT1E    | 0.175536194  | 1.46E-07  | 0.002663  | 0.430335 | 2.31E-28  | 4.22E-24  |
| MT1F    | 0.388752241  | 2.64E-47  | 4.81E-43  | -0.0527  | 0.0027746 | 1         |
| MT1G    | 0.870051473  | 4.56E-149 | 8.32E-145 | 0.636863 | 2.91E-78  | 5.31E-74  |
| MT1H    | 0.640489767  | 3.26E-68  | 5.94E-64  | 0.522455 | 3.31E-43  | 6.05E-39  |
| MT1M    | 0.264765417  | 5.32E-26  | 9.71E-22  | 0.405756 | 1.24E-54  | 2.26E-50  |
| MT1X    | 0.94011814   | 6.13E-221 | 1.12E-216 | 0.97663  | 5.90E-238 | 1.08E-233 |
| MT2A    | 0.979258309  | 3.70E-217 | 6.75E-213 | 1.856842 | 0         | 0         |
| MTDH    | -0.28366825  | 3.82E-79  | 6.96E-75  | -0.2803  | 1.23E-87  | 2.24E-83  |
| MYL12B  | -0.299047751 | 3.55E-85  | 6.48E-81  | -0.19951 | 6.60E-50  | 1.20E-45  |
| MYL6    | -0.416169768 | 1.36E-184 | 2.48E-180 | -0.3447  | 2.09E-162 | 3.82E-158 |
| MYLK    | -0.371129229 | 3.57E-105 | 6.52E-101 | -0.46966 | 1.46E-220 | 2.66E-216 |
| MZT2B   | -0.276078954 | 1.24E-123 | 2.26E-119 | -0.14807 | 1.65E-52  | 3.01E-48  |
| NACA    | -0.268202496 | 3.41E-178 | 6.23E-174 | -0.21487 | 7.55E-146 | 1.38E-141 |
| NAMPT   | 0.415128479  | 2.89E-127 | 5.26E-123 | 0.250267 | 1.10E-60  | 2.01E-56  |
| NAP1L1  | -0.40967988  | 1.08E-199 | 1.97E-195 | -0.39303 | 2.54E-217 | 4.64E-213 |
| NBEAL1  | -0.260849408 | 6.98E-112 | 1.27E-107 | 0.043653 | 0.0034794 | 1         |
| NBPF14  | 0.198524562  | 4.68E-60  | 8.55E-56  | 0.386182 | 1.45E-196 | 2.65E-192 |
| NDRG1   | 0.457039683  | 5.69E-117 | 1.04E-112 | 0.678279 | 0         | 0         |
| NDUFA11 | -0.400336014 | 4.54E-189 | 8.28E-185 | -0.40808 | 1.98E-229 | 3.61E-225 |
| NDUFB8  | 0.066192547  | 0.000683  | 1         | 0.260752 | 5.31E-60  | 9.68E-56  |
| NEAT1   | -0.796160042 | 0         | 0         | -0.94106 | 0         | 0         |
| NENF    | -0.136956847 | 2.69E-30  | 4.91E-26  | -0.27225 | 7.39E-124 | 1.35E-119 |
| NFIA    | -0.390475603 | 3.65E-156 | 6.66E-152 | -0.48899 | 0         | 0         |
| NFIC    | -0.293819013 | 1.53E-79  | 2.79E-75  | -0.29248 | 1.02E-100 | 1.86E-96  |
| NFKBIA  | 0.102219684  | 2.25E-12  | 4.10E-08  | 0.270574 | 7.51E-32  | 1.37E-27  |
| NGFRAP1 | -0.396595902 | 7.36E-163 | 1.34E-158 | -0.81782 | 0         | 0         |
| NINJ1   | -0.297232679 | 1.15E-89  | 2.09E-85  | -0.24215 | 3.31E-95  | 6.05E-91  |
| NKX3-2  | -0.31906555  | 8.88E-112 | 1.62E-107 | -0.27554 | 9.55E-153 | 1.74E-148 |

|         |              |           |           |
|---------|--------------|-----------|-----------|
| NME4    | -0.092680447 | 2.97E-12  | 5.42E-08  |
| NMRK1   | -0.270085709 | 3.95E-80  | 7.21E-76  |
| NNMT    | -0.379006291 | 1.79E-109 | 3.27E-105 |
| NOL7    | 0.200199227  | 8.88E-30  | 1.62E-25  |
| NOVA1   | 0.186444544  | 4.55E-09  | 8.30E-05  |
| NPC2    | -0.547508189 | 0         | 0         |
| NPM1    | -0.340699168 | 1.02E-117 | 1.85E-113 |
| NPR3    | 0.28304238   | 3.14E-148 | 5.74E-144 |
| NRN1    | 0.372515651  | 2.33E-35  | 4.25E-31  |
| NRP2    | 0.389938487  | 1.92E-112 | 3.51E-108 |
| NT5C3A  | 0.379480961  | 8.52E-98  | 1.56E-93  |
| NT5E    | 0.066154529  | 1.44E-07  | 0.00262   |
| NTMT1   | 0.256162582  | 1.24E-64  | 2.25E-60  |
| NUCB1   | -0.024461981 | 0.161962  | 1         |
| NUCB2   | -0.326035717 | 4.88E-69  | 8.90E-65  |
| NUPR1   | -0.244007185 | 1.52E-43  | 2.77E-39  |
| OAF     | -0.280432546 | 1.03E-73  | 1.89E-69  |
| OGN     | -1.078087937 | 0         | 0         |
| ORM1    | 0.474674845  | 3.29E-46  | 6.00E-42  |
| ORM2    | 0.145793632  | 1.58E-11  | 2.89E-07  |
| OS9     | -0.127449476 | 1.41E-19  | 2.58E-15  |
| OSBPL9  | -0.250663295 | 8.26E-54  | 1.51E-49  |
| OXA1L   | -0.356925375 | 4.10E-115 | 7.49E-111 |
| P4HB    | -0.570607535 | 1.49E-243 | 2.73E-239 |
| PABPC1  | -0.460574462 | 1.03E-231 | 1.89E-227 |
| PAM     | 0.196305144  | 1.41E-28  | 2.57E-24  |
| PAX1    | -0.812142646 | 0         | 0         |
| PCBP2   | -0.40973104  | 1.81E-218 | 3.30E-214 |
| PCOLCE2 | -0.036591022 | 0.025366  | 1         |
| PDE4B   | 0.435873712  | 1.64E-183 | 2.99E-179 |
| PDE4DIP | -0.35474254  | 2.33E-121 | 4.25E-117 |
| PDIA3   | -0.233138353 | 1.48E-41  | 2.70E-37  |
| PDIA6   | -0.40303167  | 4.19E-126 | 7.65E-122 |
| PEBP1   | -0.425279972 | 1.12E-205 | 2.04E-201 |
| PFDN2   | 0.183872715  | 2.27E-28  | 4.13E-24  |
| PGAM1   | -0.259094944 | 1.44E-69  | 2.64E-65  |
| PGK1    | 0.380349906  | 1.05E-97  | 1.91E-93  |
| PHLDA1  | 0.869958322  | 1.57E-244 | 2.86E-240 |
| PID1    | 0.203109864  | 2.51E-24  | 4.57E-20  |

|          |           |           |
|----------|-----------|-----------|
| -0.27343 | 1.02E-94  | 1.86E-90  |
| -0.28336 | 1.19E-118 | 2.17E-114 |
| -0.56703 | 3.31E-220 | 6.04E-216 |
| 0.317616 | 5.24E-96  | 9.56E-92  |
| -0.33522 | 3.08E-60  | 5.61E-56  |
| -0.57538 | 0         | 0         |
| -0.22266 | 4.97E-66  | 9.07E-62  |
| 0.370328 | 5.47E-232 | 9.99E-228 |
| 0.239571 | 1.62E-34  | 2.95E-30  |
| 0.896849 | 0         | 0         |
| 0.177167 | 7.04E-42  | 1.29E-37  |
| 0.31035  | 1.29E-98  | 2.36E-94  |
| 0.352127 | 2.19E-137 | 4.00E-133 |
| -0.27534 | 8.87E-87  | 1.62E-82  |
| -0.40914 | 1.44E-154 | 2.63E-150 |
| -0.36249 | 2.35E-137 | 4.30E-133 |
| -0.32375 | 5.66E-136 | 1.03E-131 |
| -1.55808 | 0         | 0         |
| 0.43969  | 3.22E-30  | 5.87E-26  |
| 0.273606 | 4.58E-26  | 8.35E-22  |
| -0.26038 | 2.67E-87  | 4.86E-83  |
| -0.21343 | 1.82E-65  | 3.33E-61  |
| -0.24631 | 3.17E-67  | 5.79E-63  |
| -0.78829 | 0         | 0         |
| -0.56531 | 0         | 0         |
| -0.25098 | 6.86E-80  | 1.25E-75  |
| -1.00815 | 0         | 0         |
| -0.43098 | 1.61E-276 | 2.94E-272 |
| -0.42227 | 8.06E-169 | 1.47E-164 |
| 0.397643 | 2.49E-182 | 4.54E-178 |
| -0.42978 | 9.22E-221 | 1.68E-216 |
| -0.44664 | 1.39E-176 | 2.54E-172 |
| -0.65016 | 0         | 0         |
| -0.55665 | 0         | 0         |
| 0.369926 | 1.98E-144 | 3.61E-140 |
| -0.25301 | 1.47E-90  | 2.68E-86  |
| 0.418274 | 1.59E-146 | 2.90E-142 |
| 0.6237   | 2.81E-255 | 5.12E-251 |
| 0.303355 | 4.46E-61  | 8.14E-57  |

|          |              |           |           |
|----------|--------------|-----------|-----------|
| PIK3R1   | -0.164332366 | 9.35E-22  | 1.71E-17  |
| PIM3     | -0.134714195 | 8.77E-13  | 1.60E-08  |
| PKM      | -0.217721915 | 4.40E-32  | 8.03E-28  |
| PLA2G16  | -0.314801484 | 5.16E-99  | 9.42E-95  |
| PLA2G2A  | 1.370606499  | 0         | 0         |
| PLA2G4A  | 0.327739529  | 2.30E-116 | 4.19E-112 |
| PLAC9    | -0.423987588 | 2.82E-133 | 5.14E-129 |
| PLAUR    | 0.343950481  | 3.49E-93  | 6.38E-89  |
| PLCG2    | 0.133604367  | 4.34E-24  | 7.91E-20  |
| PLD3     | -0.043599125 | 1.16E-08  | 0.000211  |
| PLP2     | -0.250071972 | 1.43E-68  | 2.61E-64  |
| PLPP1    | -0.486484433 | 2.13E-131 | 3.89E-127 |
| PLXDC2   | -0.370895384 | 1.39E-108 | 2.53E-104 |
| PMP22    | 0.51733219   | 3.28E-137 | 5.98E-133 |
| PNISR    | -0.228026145 | 2.87E-52  | 5.23E-48  |
| PNKD     | -0.093776692 | 9.71E-15  | 1.77E-10  |
| PNRC1    | 0.059033604  | 0.829217  | 1         |
| POLR2L   | -0.140835779 | 7.73E-16  | 1.41E-11  |
| PPFIBP1  | 0.394367815  | 2.25E-83  | 4.10E-79  |
| PPIA     | -0.340137456 | 4.58E-171 | 8.36E-167 |
| PIIB     | -0.199311708 | 4.35E-37  | 7.94E-33  |
| PPIC     | -0.351470832 | 2.07E-80  | 3.77E-76  |
| PPP1CB   | 0.546811979  | 2.70E-116 | 4.93E-112 |
| PPP1R14C | 0.196454822  | 8.05E-74  | 1.47E-69  |
| PPP1R15A | 0.42355969   | 4.56E-125 | 8.32E-121 |
| PPP1R3C  | 0.07031931   | 0.000616  | 1         |
| PPP3CA   | 0.895530043  | 0         | 0         |
| PPT1     | -0.282680136 | 8.64E-82  | 1.58E-77  |
| PRCP     | -0.259463286 | 7.75E-86  | 1.41E-81  |
| PRDX4    | -0.183932027 | 4.44E-34  | 8.11E-30  |
| PRDX5    | -0.270865933 | 8.73E-102 | 1.59E-97  |
| PRELP    | 0.074196163  | 0.069956  | 1         |
| PRG4     | 1.357437599  | 0         | 0         |
| PRSS23   | -0.286324437 | 1.02E-15  | 1.86E-11  |
| PRUNE2   | -0.44340507  | 1.24E-135 | 2.26E-131 |
| PSAP     | -0.282556266 | 9.04E-87  | 1.65E-82  |
| PSMA7    | -0.346093411 | 8.46E-123 | 1.54E-118 |
| PTGES    | 0.214775527  | 6.90E-95  | 1.26E-90  |
| PTGES3   | 0.324783234  | 4.73E-112 | 8.62E-108 |

|          |           |           |
|----------|-----------|-----------|
| -0.25189 | 3.81E-89  | 6.95E-85  |
| -0.32985 | 1.23E-102 | 2.24E-98  |
| -0.37436 | 8.30E-143 | 1.51E-138 |
| -0.2594  | 2.37E-96  | 4.32E-92  |
| 0.126266 | 0.0084414 | 1         |
| 0.211714 | 1.00E-73  | 1.83E-69  |
| -1.28233 | 0         | 0         |
| 0.520776 | 5.92E-245 | 1.08E-240 |
| 0.470338 | 2.15E-104 | 3.92E-100 |
| -0.29713 | 2.33E-116 | 4.26E-112 |
| -0.06329 | 1.54E-08  | 0.000281  |
| -0.50353 | 1.85E-206 | 3.38E-202 |
| -0.46294 | 4.12E-226 | 7.51E-222 |
| 0.74764  | 0         | 0         |
| -0.33643 | 1.73E-133 | 3.16E-129 |
| -0.27103 | 6.91E-123 | 1.26E-118 |
| -0.26635 | 7.21E-116 | 1.32E-111 |
| -0.34664 | 3.52E-126 | 6.42E-122 |
| 0.432862 | 9.27E-138 | 1.69E-133 |
| -0.26948 | 1.14E-139 | 2.08E-135 |
| -0.3102  | 2.03E-103 | 3.71E-99  |
| -0.5053  | 1.80E-213 | 3.28E-209 |
| 0.545931 | 7.70E-161 | 1.40E-156 |
| 0.321433 | 7.08E-178 | 1.29E-173 |
| 0.565643 | 9.42E-244 | 1.72E-239 |
| -0.40155 | 3.65E-138 | 6.67E-134 |
| 0.621868 | 1.04E-216 | 1.90E-212 |
| -0.38217 | 9.55E-184 | 1.74E-179 |
| -0.30823 | 2.01E-171 | 3.68E-167 |
| -0.43837 | 3.02E-174 | 5.52E-170 |
| -0.32704 | 2.05E-163 | 3.75E-159 |
| -0.59135 | 5.83E-262 | 1.06E-257 |
| 1.997413 | 0         | 0         |
| -0.27661 | 2.56E-26  | 4.68E-22  |
| -0.41492 | 4.55E-201 | 8.30E-197 |
| -0.42044 | 1.21E-203 | 2.20E-199 |
| -0.01005 | 0.3378195 | 1         |
| 0.27336  | 6.56E-156 | 1.20E-151 |
| 0.379671 | 2.89E-173 | 5.28E-169 |

|               |              |           |           |
|---------------|--------------|-----------|-----------|
| PTGS2         | 1.11478136   | 0         | 0         |
| PTMS          | -0.376605247 | 3.15E-135 | 5.75E-131 |
| PTP4A1        | 0.536434095  | 1.58E-126 | 2.89E-122 |
| PTPRD-AS1     | -0.2254385   | 1.40E-56  | 2.56E-52  |
| PTRF          | -0.495446008 | 2.16E-182 | 3.95E-178 |
| RAB13         | 0.268377603  | 1.23E-52  | 2.24E-48  |
| RAB1A         | 0.27671385   | 2.26E-65  | 4.13E-61  |
| RABAC1        | -0.363523813 | 4.53E-153 | 8.27E-149 |
| RABGGTB       | 0.399869235  | 6.65E-132 | 1.21E-127 |
| RARRES3       | -0.262226806 | 5.00E-111 | 9.12E-107 |
| RBM3          | -0.248216709 | 2.30E-53  | 4.19E-49  |
| RBP4          | -0.084257377 | 1.90E-27  | 3.46E-23  |
| RCN1          | -0.163560822 | 1.42E-24  | 2.59E-20  |
| RELB          | 0.284116965  | 2.56E-83  | 4.68E-79  |
| RGCC          | -0.122823966 | 0.125307  | 1         |
| RGS10         | -0.314814699 | 6.40E-91  | 1.17E-86  |
| RGS16         | 0.239005653  | 1.58E-15  | 2.89E-11  |
| RGS2          | 0.14626965   | 2.56E-29  | 4.68E-25  |
| RHOBTB3       | -0.530301361 | 1.55E-197 | 2.82E-193 |
| RIPK2         | 0.135405785  | 4.27E-25  | 7.79E-21  |
| RNASET2       | -0.11005092  | 2.10E-16  | 3.83E-12  |
| RND3          | 0.207229247  | 1.06E-48  | 1.93E-44  |
| RNF114        | 0.177533484  | 2.45E-19  | 4.47E-15  |
| RNF126        | 0.250328024  | 3.24E-68  | 5.91E-64  |
| RNF130        | -0.203023328 | 2.08E-45  | 3.80E-41  |
| RNF145        | 0.441947215  | 5.02E-132 | 9.15E-128 |
| RNMT          | 0.328772294  | 5.03E-82  | 9.18E-78  |
| RP11-553L6.5  | -0.190659703 | 4.99E-45  | 9.10E-41  |
| RP11-71N10.1  | -0.259891993 | 3.73E-121 | 6.80E-117 |
| RP11-983P16.4 | -0.203744686 | 5.79E-46  | 1.06E-41  |
| RP5-1097P24.1 | -0.215130415 | 2.24E-63  | 4.09E-59  |
| RPA3          | -0.25951939  | 1.29E-73  | 2.35E-69  |
| RPL10         | -0.399052674 | 0         | 0         |
| RPL10A        | -0.600013881 | 0         | 0         |
| RPL11         | -0.291537797 | 5.09E-291 | 9.29E-287 |
| RPL13         | -0.335580039 | 0         | 0         |
| RPL13A        | -0.4240303   | 0         | 0         |
| RPL14         | -0.415023066 | 0         | 0         |
| RPL15         | -0.278245026 | 0         | 0         |

|          |           |           |
|----------|-----------|-----------|
| 1.189169 | 0         | 0         |
| -0.47495 | 3.63E-282 | 6.62E-278 |
| 0.44409  | 2.72E-137 | 4.96E-133 |
| -0.3002  | 1.89E-129 | 3.44E-125 |
| -0.53925 | 1.12E-269 | 2.04E-265 |
| 0.231329 | 1.31E-51  | 2.40E-47  |
| 0.163201 | 3.25E-26  | 5.93E-22  |
| -0.36007 | 7.45E-184 | 1.36E-179 |
| 0.638346 | 0         | 0         |
| -0.26378 | 1.13E-176 | 2.06E-172 |
| -0.2644  | 6.52E-79  | 1.19E-74  |
| -0.7101  | 0         | 0         |
| -0.28617 | 2.39E-91  | 4.35E-87  |
| 0.530461 | 4.34E-287 | 7.91E-283 |
| 0.434918 | 3.71E-121 | 6.76E-117 |
| -0.0722  | 1.36E-11  | 2.49E-07  |
| 0.404056 | 3.35E-51  | 6.10E-47  |
| 0.376537 | 8.12E-54  | 1.48E-49  |
| -0.77459 | 0         | 0         |
| 0.299301 | 1.26E-127 | 2.30E-123 |
| -0.25175 | 7.19E-106 | 1.31E-101 |
| 0.477802 | 1.83E-167 | 3.35E-163 |
| 0.466091 | 7.06E-170 | 1.29E-165 |
| 0.270064 | 2.92E-95  | 5.33E-91  |
| -0.36818 | 1.52E-150 | 2.77E-146 |
| 0.528494 | 1.55E-199 | 2.84E-195 |
| 0.259755 | 7.16E-58  | 1.31E-53  |
| -0.26309 | 3.19E-127 | 5.82E-123 |
| -0.23785 | 8.11E-163 | 1.48E-158 |
| -0.32001 | 3.43E-150 | 6.25E-146 |
| -0.34165 | 7.55E-181 | 1.38E-176 |
| -0.16398 | 4.28E-37  | 7.82E-33  |
| -0.33251 | 0         | 0         |
| -0.58749 | 0         | 0         |
| -0.24152 | 1.94E-265 | 3.55E-261 |
| -0.29511 | 0         | 0         |
| -0.35161 | 0         | 0         |
| -0.28396 | 1.34E-278 | 2.45E-274 |
| -0.28651 | 0         | 0         |

|         |              |           |           |
|---------|--------------|-----------|-----------|
| RPL18   | -0.560658654 | 0         | 0         |
| RPL18A  | -0.361013653 | 0         | 0         |
| RPL19   | -0.377446596 | 0         | 0         |
| RPL21   | -0.367858429 | 0         | 0         |
| RPL22   | -0.311641152 | 5.29E-237 | 9.65E-233 |
| RPL23   | -0.502072008 | 0         | 0         |
| RPL23A  | -0.491563689 | 0         | 0         |
| RPL27   | -0.362528094 | 1.02E-303 | 1.86E-299 |
| RPL27A  | -0.295372093 | 6.47E-281 | 1.18E-276 |
| RPL28   | -0.271941912 | 2.35E-252 | 4.29E-248 |
| RPL29   | -0.366443184 | 0         | 0         |
| RPL3    | -0.368806953 | 0         | 0         |
| RPL30   | -0.46893798  | 0         | 0         |
| RPL31   | -0.388772276 | 0         | 0         |
| RPL34   | -0.501580745 | 0         | 0         |
| RPL35   | -0.324073533 | 0         | 0         |
| RPL35A  | -0.328356236 | 0         | 0         |
| RPL36AL | -0.257852895 | 1.75E-112 | 3.20E-108 |
| RPL37   | -0.430016787 | 0         | 0         |
| RPL37A  | -0.344437927 | 0         | 0         |
| RPL39   | -0.30553987  | 1.73E-253 | 3.16E-249 |
| RPL4    | -0.603032179 | 0         | 0         |
| RPL5    | -0.250473411 | 3.62E-150 | 6.60E-146 |
| RPL6    | -0.224920895 | 7.03E-146 | 1.28E-141 |
| RPL7    | -0.569407136 | 0         | 0         |
| RPL7A   | -0.29003522  | 5.24E-249 | 9.55E-245 |
| RPL8    | -0.387690008 | 0         | 0         |
| RPL9    | -0.419501355 | 0         | 0         |
| RPLP0   | -0.735199464 | 0         | 0         |
| RPLP1   | -0.373397583 | 0         | 0         |
| RPLP2   | -0.52177402  | 0         | 0         |
| RPN2    | -0.211585734 | 4.37E-52  | 7.98E-48  |
| RPS11   | -0.996321936 | 0         | 0         |
| RPS12   | -0.321608688 | 1.06E-291 | 1.94E-287 |
| RPS13   | -0.430611059 | 0         | 0         |
| RPS14   | -0.256522044 | 2.05E-260 | 3.74E-256 |
| RPS15A  | -0.267163197 | 4.69E-237 | 8.55E-233 |
| RPS16   | -0.540914761 | 0         | 0         |
| RPS17   | -0.531098443 | 0         | 0         |

|          |           |           |
|----------|-----------|-----------|
| -0.39718 | 0         | 0         |
| -0.23731 | 4.38E-250 | 7.99E-246 |
| -0.36404 | 0         | 0         |
| -0.21813 | 1.97E-220 | 3.59E-216 |
| -0.26272 | 2.86E-208 | 5.22E-204 |
| -0.37561 | 0         | 0         |
| -0.41789 | 0         | 0         |
| -0.21471 | 2.93E-151 | 5.35E-147 |
| -0.1821  | 4.70E-162 | 8.57E-158 |
| -0.16079 | 6.24E-134 | 1.14E-129 |
| -0.23241 | 2.11E-223 | 3.85E-219 |
| -0.43298 | 0         | 0         |
| -0.38014 | 0         | 0         |
| -0.18681 | 2.48E-136 | 4.52E-132 |
| -0.43144 | 0         | 0         |
| -0.19545 | 1.91E-172 | 3.48E-168 |
| -0.1883  | 5.84E-151 | 1.07E-146 |
| -0.13732 | 1.85E-40  | 3.38E-36  |
| -0.27035 | 1.59E-290 | 2.90E-286 |
| -0.2519  | 0         | 0         |
| -0.1597  | 1.69E-100 | 3.09E-96  |
| -0.67059 | 0         | 0         |
| -0.31593 | 2.08E-277 | 3.79E-273 |
| -0.28609 | 8.89E-281 | 1.62E-276 |
| -0.52936 | 0         | 0         |
| -0.27743 | 3.18E-289 | 5.81E-285 |
| -0.31745 | 0         | 0         |
| -0.37862 | 0         | 0         |
| -0.57104 | 0         | 0         |
| -0.29514 | 0         | 0         |
| -0.38167 | 0         | 0         |
| -0.33094 | 8.68E-156 | 1.58E-151 |
| -0.67142 | 0         | 0         |
| -0.27011 | 1.22E-272 | 2.22E-268 |
| -0.32814 | 0         | 0         |
| -0.18167 | 1.96E-182 | 3.57E-178 |
| -0.07521 | 5.31E-34  | 9.69E-30  |
| -0.40861 | 0         | 0         |
| -0.36662 | 0         | 0         |

|          |              |           |           |
|----------|--------------|-----------|-----------|
| RPS18    | -0.390598893 | 0         | 0         |
| RPS19    | -0.268172186 | 1.58E-228 | 2.89E-224 |
| RPS2     | -0.411142258 | 0         | 0         |
| RPS20    | -0.989254592 | 0         | 0         |
| RPS21    | -0.288315569 | 4.97E-220 | 9.07E-216 |
| RPS23    | -0.386972626 | 0         | 0         |
| RPS24    | -0.284117856 | 3.01E-219 | 5.49E-215 |
| RPS25    | -0.290318986 | 6.45E-243 | 1.18E-238 |
| RPS27    | -0.32760625  | 9.94E-293 | 1.81E-288 |
| RPS27A   | -0.431504219 | 0         | 0         |
| RPS29    | -0.467745767 | 0         | 0         |
| RPS3     | -0.283168784 | 5.21E-285 | 9.51E-281 |
| RPS3A    | -0.511330521 | 0         | 0         |
| RPS4X    | -0.263612511 | 2.54E-239 | 4.64E-235 |
| RPS4Y1   | -0.23473409  | 4.59E-100 | 8.37E-96  |
| RPS5     | -0.367780398 | 0         | 0         |
| RPS6     | -0.313071371 | 0         | 0         |
| RPS7     | -0.374114298 | 0         | 0         |
| RPS8     | -0.637925867 | 0         | 0         |
| RPS9     | -0.299823187 | 7.46E-278 | 1.36E-273 |
| RPSA     | -0.453682315 | 0         | 0         |
| S100A1   | -0.296795191 | 1.12E-114 | 2.05E-110 |
| S100A13  | -0.237534744 | 4.10E-107 | 7.48E-103 |
| S100A16  | 0.099340413  | 1.55E-06  | 0.028353  |
| S100A2   | 0.985003003  | 2.41E-174 | 4.41E-170 |
| S100A4   | -0.345899812 | 4.90E-38  | 8.93E-34  |
| S100B    | -0.051730395 | 4.12E-15  | 7.51E-11  |
| SAR1A    | 0.283855111  | 6.41E-67  | 1.17E-62  |
| SARAF    | -0.095110849 | 8.92E-12  | 1.63E-07  |
| SAT1     | 0.253304341  | 5.14E-53  | 9.38E-49  |
| SCRG1    | 0.082860694  | 0.013475  | 1         |
| SDC2     | -0.332100401 | 1.48E-87  | 2.71E-83  |
| SDF4     | -0.283235366 | 1.57E-85  | 2.87E-81  |
| SEC11A   | -0.475524619 | 4.62E-259 | 8.44E-255 |
| SELK     | 0.285640658  | 4.87E-73  | 8.89E-69  |
| SEPP1    | -0.192352728 | 3.83E-49  | 6.99E-45  |
| SERF2    | -0.056523476 | 1.53E-06  | 0.027863  |
| SERPINA5 | -0.460785663 | 1.06E-145 | 1.94E-141 |
| SERPINE1 | 0.291447657  | 5.46E-88  | 9.97E-84  |

|          |           |           |
|----------|-----------|-----------|
| -0.29434 | 0         | 0         |
| -0.21834 | 1.54E-185 | 2.81E-181 |
| -0.35477 | 0         | 0         |
| -0.66435 | 0         | 0         |
| -0.11658 | 8.21E-55  | 1.50E-50  |
| -0.31687 | 0         | 0         |
| -0.18546 | 6.91E-132 | 1.26E-127 |
| -0.2403  | 1.31E-202 | 2.40E-198 |
| -0.17803 | 4.15E-120 | 7.57E-116 |
| -0.34714 | 0         | 0         |
| -0.28703 | 0         | 0         |
| -0.26529 | 0         | 0         |
| -0.45149 | 0         | 0         |
| -0.30781 | 0         | 0         |
| -0.28762 | 2.89E-162 | 5.28E-158 |
| -0.32009 | 0         | 0         |
| -0.32879 | 0         | 0         |
| -0.31652 | 0         | 0         |
| -0.61223 | 0         | 0         |
| -0.29039 | 0         | 0         |
| -0.34579 | 5.49E-275 | 1.00E-270 |
| -0.49437 | 0         | 0         |
| -0.38199 | 9.21E-284 | 1.68E-279 |
| 0.346662 | 1.81E-89  | 3.30E-85  |
| 1.126137 | 0         | 0         |
| -0.48364 | 3.19E-106 | 5.83E-102 |
| -0.78257 | 0         | 0         |
| 0.305322 | 2.93E-90  | 5.35E-86  |
| -0.25676 | 2.62E-84  | 4.79E-80  |
| 0.017158 | 0.3346245 | 1         |
| -0.30437 | 1.877E-79 | 3.43E-75  |
| -0.53649 | 3.41E-274 | 6.22E-270 |
| -0.46365 | 8.07E-232 | 1.47E-227 |
| -0.41467 | 3.13E-257 | 5.72E-253 |
| 0.378225 | 9.62E-141 | 1.76E-136 |
| -0.396   | 6.57E-196 | 1.20E-191 |
| -0.30604 | 1.00E-163 | 1.83E-159 |
| -0.53898 | 5.85E-227 | 1.07E-222 |
| 0.482349 | 1.56E-182 | 2.84E-178 |

|          |              |           |           |
|----------|--------------|-----------|-----------|
| SERPINE2 | 0.686987933  | 3.68E-186 | 6.71E-182 |
| SFT2D1   | 0.203116495  | 8.37E-39  | 1.53E-34  |
| SGIP1    | 0.372898096  | 2.57E-173 | 4.70E-169 |
| SH3BGRL  | -0.220492437 | 1.53E-56  | 2.79E-52  |
| SH3BP5   | 0.281808366  | 1.19E-42  | 2.17E-38  |
| SH3GLB1  | 0.005662482  | 0.911977  | 1         |
| SLC14A1  | -0.559160275 | 5.60E-223 | 1.02E-218 |
| SLC1A5   | -0.128711153 | 1.71E-22  | 3.11E-18  |
| SLC20A1  | 0.271628319  | 7.55E-68  | 1.38E-63  |
| SLC25A3  | -0.407225694 | 1.57E-195 | 2.86E-191 |
| SLC25A36 | 0.296803911  | 9.64E-77  | 1.76E-72  |
| SLC25A37 | 0.585658652  | 2.34E-218 | 4.27E-214 |
| SLC29A1  | -0.260938801 | 1.56E-78  | 2.84E-74  |
| SLC2A1   | 0.546497282  | 1.10E-155 | 2.00E-151 |
| SLC38A1  | -0.253385768 | 3.53E-78  | 6.44E-74  |
| SLC39A8  | 0.351690559  | 7.96E-107 | 1.45E-102 |
| SLC3A2   | 0.515566623  | 1.47E-97  | 2.68E-93  |
| SLC40A1  | -0.786406252 | 1.77E-287 | 3.24E-283 |
| SLC44A1  | -0.34242341  | 5.20E-111 | 9.49E-107 |
| SLC5A3   | 0.351336296  | 2.68E-45  | 4.89E-41  |
| SLC7A2   | 0.19064044   | 2.40E-53  | 4.37E-49  |
| SLPI     | -0.118154094 | 7.37E-25  | 1.35E-20  |
| SMIM14   | -0.131479983 | 1.24E-22  | 2.26E-18  |
| SMIM3    | 0.297005171  | 1.23E-125 | 2.25E-121 |
| SMOX     | 0.316539717  | 8.83E-54  | 1.61E-49  |
| SMS      | 0.165691709  | 1.27E-17  | 2.32E-13  |
| SNAI2    | -0.222412539 | 1.20E-36  | 2.19E-32  |
| SNHG12   | 0.242920247  | 4.41E-42  | 8.05E-38  |
| SNRNP27  | 0.26091916   | 2.05E-71  | 3.74E-67  |
| SOCS3    | -0.187395917 | 2.05E-34  | 3.73E-30  |
| SOD1     | -0.165076722 | 5.38E-45  | 9.82E-41  |
| SOD2     | 0.554512124  | 4.82E-160 | 8.80E-156 |
| SOD3     | -0.142208546 | 4.03E-08  | 0.000735  |
| SOX9     | 0.105780382  | 8.31E-08  | 0.001517  |
| SPARC    | -0.794579106 | 7.12E-253 | 1.30E-248 |
| SPINT2   | -0.388831955 | 1.63E-131 | 2.97E-127 |
| SPON2    | -0.216316552 | 1.01E-34  | 1.84E-30  |
| SPP1     | 1.967115816  | 0         | 0         |
| SPRY2    | 0.420645313  | 9.16E-154 | 1.67E-149 |

|          |           |           |
|----------|-----------|-----------|
| 0.775334 | 1.42E-241 | 2.59E-237 |
| 0.255385 | 1.73E-78  | 3.16E-74  |
| 0.480338 | 3.88E-289 | 7.08E-285 |
| -0.40485 | 7.96E-196 | 1.45E-191 |
| 0.356151 | 1.98E-102 | 3.62E-98  |
| 0.255229 | 8.98E-71  | 1.64E-66  |
| -0.53924 | 1.28E-300 | 2.34E-296 |
| -0.27594 | 1.63E-130 | 2.98E-126 |
| 0.41148  | 6.07E-169 | 1.11E-164 |
| -0.26565 | 5.20E-114 | 9.48E-110 |
| 0.26363  | 6.94E-68  | 1.27E-63  |
| 0.614924 | 0         | 0         |
| -0.18663 | 3.18E-59  | 5.81E-55  |
| 0.617201 | 2.13E-284 | 3.89E-280 |
| -0.31405 | 8.57E-156 | 1.56E-151 |
| 0.053007 | 0.0003806 | 1         |
| 0.607648 | 1.44E-203 | 2.64E-199 |
| -0.6631  | 0         | 0         |
| -0.31791 | 1.15E-134 | 2.10E-130 |
| 0.371444 | 3.84E-63  | 7.01E-59  |
| 0.440427 | 1.42E-192 | 2.59E-188 |
| -1.53355 | 0         | 0         |
| -0.25416 | 1.19E-87  | 2.18E-83  |
| 0.196389 | 1.79E-78  | 3.27E-74  |
| 0.760869 | 8.93E-293 | 1.63E-288 |
| 0.314466 | 8.30E-74  | 1.51E-69  |
| -0.65739 | 3.94E-247 | 7.19E-243 |
| 0.643826 | 2.70E-288 | 4.93E-284 |
| 0.275948 | 2.01E-79  | 3.68E-75  |
| -0.26309 | 4.12E-88  | 7.53E-84  |
| -0.26493 | 8.84E-109 | 1.61E-104 |
| 1.278455 | 0         | 0         |
| -0.54831 | 3.15E-169 | 5.76E-165 |
| -0.26217 | 1.36E-65  | 2.48E-61  |
| -0.63089 | 0         | 0         |
| -0.39017 | 4.13E-170 | 7.54E-166 |
| -0.498   | 3.50E-272 | 6.39E-268 |
| 2.760795 | 0         | 0         |
| 0.532124 | 1.79E-295 | 3.26E-291 |



|                  |              |           |           |
|------------------|--------------|-----------|-----------|
| <b>SPTLC3</b>    | -0.334604693 | 3.73E-74  | 6.80E-70  |
| <b>SPTSSB</b>    | -1.439238522 | 0         | 0         |
| <b>SQSTM1</b>    | 0.081289696  | 1.59E-06  | 0.029064  |
| <b>SRGN</b>      | 0.276315096  | 1.76E-55  | 3.21E-51  |
| <b>SRSF5</b>     | -0.125072284 | 5.95E-19  | 1.09E-14  |
| <b>SSPN</b>      | -0.373958685 | 2.21E-135 | 4.03E-131 |
| <b>SSR2</b>      | -0.458879589 | 6.71E-232 | 1.23E-227 |
| <b>SSR3</b>      | -0.503695353 | 5.38E-214 | 9.82E-210 |
| <b>SSR4</b>      | -0.304516646 | 3.09E-97  | 5.64E-93  |
| <b>ST13</b>      | -0.272378054 | 7.20E-98  | 1.31E-93  |
| <b>STK17A</b>    | 0.67305458   | 9.52E-180 | 1.74E-175 |
| <b>SVIP</b>      | 0.053532502  | 0.007189  | 1         |
| <b>SYF2</b>      | 0.063708267  | 0.000741  | 1         |
| <b>TBCA</b>      | 0.143695969  | 1.57E-28  | 2.86E-24  |
| <b>TCEA3</b>     | -0.185657665 | 1.63E-42  | 2.98E-38  |
| <b>TCEAL8</b>    | -0.221173872 | 1.88E-59  | 3.43E-55  |
| <b>TCF4</b>      | -0.555353189 | 8.84E-206 | 1.61E-201 |
| <b>TFPI</b>      | 0.253117224  | 5.46E-87  | 9.96E-83  |
| <b>TFPI2</b>     | 0            | NA        | NA        |
| <b>TGFBI</b>     | 1.115436889  | 0         | 0         |
| <b>TGM2</b>      | 0.098732655  | 4.02E-11  | 7.34E-07  |
| <b>THY1</b>      | -0.723040339 | 5.32E-165 | 9.71E-161 |
| <b>TIMP1</b>     | 0.643646611  | 1.82E-75  | 3.32E-71  |
| <b>TIMP2</b>     | -0.260358731 | 3.65E-66  | 6.66E-62  |
| <b>TIMP3</b>     | 0.098902165  | 0.012343  | 1         |
| <b>TM4SF1</b>    | 0.326338148  | 1.72E-20  | 3.14E-16  |
| <b>TMED10</b>    | -0.240675012 | 3.23E-60  | 5.89E-56  |
| <b>TMED2</b>     | -0.046658795 | 0.000226  | 1         |
| <b>TMEM219</b>   | -0.19856927  | 1.84E-50  | 3.36E-46  |
| <b>TMEM230</b>   | -0.08148184  | 2.48E-11  | 4.52E-07  |
| <b>TMEM38B</b>   | 0.304631861  | 5.04E-67  | 9.19E-63  |
| <b>TMEM45A</b>   | 0.540571774  | 4.31E-159 | 7.86E-155 |
| <b>TMEM59</b>    | -0.043239496 | 8.25E-06  | 0.150486  |
| <b>TMEM98</b>    | -0.163830055 | 1.02E-37  | 1.86E-33  |
| <b>TMSB10</b>    | 0.187980108  | 1.99E-35  | 3.62E-31  |
| <b>TMSB4X</b>    | 0.104848561  | 1.38E-14  | 2.52E-10  |
| <b>TNC</b>       | 0            | NA        | NA        |
| <b>TNFAIP6</b>   | 0.308085839  | 3.58E-96  | 6.54E-92  |
| <b>TNFRSF11B</b> | 0.226396661  | 2.57E-26  | 4.70E-22  |

|          |           |           |
|----------|-----------|-----------|
| -0.27506 | 3.35E-85  | 6.11E-81  |
| -1.46735 | 0         | 0         |
| 0.36613  | 2.71E-99  | 4.94E-95  |
| 0.03765  | 0.569085  | 1         |
| -0.2817  | 2.20E-94  | 4.02E-90  |
| -0.43388 | 5.28E-251 | 9.63E-247 |
| -0.39392 | 8.66E-207 | 1.58E-202 |
| -0.47655 | 3.19E-256 | 5.81E-252 |
| -0.39563 | 7.70E-190 | 1.41E-185 |
| -0.3048  | 9.54E-140 | 1.74E-135 |
| 0.893491 | 0         | 0         |
| 0.275301 | 2.39E-65  | 4.37E-61  |
| 0.305108 | 2.00E-92  | 3.65E-88  |
| 0.253669 | 1.25E-103 | 2.28E-99  |
| -0.3059  | 4.61E-132 | 8.42E-128 |
| -0.35364 | 1.91E-157 | 3.48E-153 |
| -0.61326 | 0         | 0         |
| 0.409543 | 4.11E-175 | 7.50E-171 |
| 0.341522 | 1.78E-102 | 3.24E-98  |
| 0.943265 | 6.97E-308 | 1.27E-303 |
| 0.439775 | 2.00E-202 | 3.65E-198 |
| -0.63183 | 3.93E-214 | 7.17E-210 |
| 0.78624  | 1.04E-83  | 1.90E-79  |
| -0.1057  | 1.14E-19  | 2.08E-15  |
| 0.759801 | 2.68E-181 | 4.89E-177 |
| 1.00172  | 0         | 0         |
| -0.44035 | 4.03E-210 | 7.36E-206 |
| -0.29723 | 1.91E-123 | 3.48E-119 |
| -0.29544 | 1.35E-116 | 2.46E-112 |
| -0.33432 | 2.03E-131 | 3.71E-127 |
| 0.413674 | 4.04E-153 | 7.37E-149 |
| 0.387245 | 7.51E-90  | 1.37E-85  |
| -0.32401 | 2.84E-119 | 5.18E-115 |
| -0.29725 | 2.35E-145 | 4.29E-141 |
| 0.528432 | 3.46E-212 | 6.31E-208 |
| 0.425685 | 1.39E-50  | 2.53E-46  |
| 0.260979 | 2.78E-87  | 5.07E-83  |
| 0.204247 | 2.61E-64  | 4.77E-60  |
| 0.279503 | 6.90E-21  | 1.26E-16  |

|                  |              |           |           |
|------------------|--------------|-----------|-----------|
| <b>TNFRSF12A</b> | 0.622308688  | 1.81E-112 | 3.31E-108 |
| <b>TNFRSF1A</b>  | -0.194998369 | 9.43E-40  | 1.72E-35  |
| <b>TNFSF11</b>   | 0.272281382  | 5.72E-138 | 1.04E-133 |
| <b>TNS1</b>      | 0.20195313   | 8.51E-64  | 1.55E-59  |
| <b>TOMM7</b>     | -0.370034314 | 0         | 0         |
| <b>TPD52</b>     | 0.309333344  | 2.67E-76  | 4.88E-72  |
| <b>TPD52L1</b>   | -0.165266308 | 3.26E-27  | 5.94E-23  |
| <b>TPM1</b>      | -0.60815029  | 9.76E-116 | 1.78E-111 |
| <b>TPM2</b>      | -0.222271274 | 5.84E-37  | 1.07E-32  |
| <b>TPT1</b>      | -0.55679477  | 0         | 0         |
| <b>TREM1</b>     | 0.54984536   | 9.81E-299 | 1.79E-294 |
| <b>TRMT112</b>   | 0.227436813  | 5.79E-61  | 1.06E-56  |
| <b>TRPS1</b>     | -0.236692745 | 6.64E-52  | 1.21E-47  |
| <b>TSC22D1</b>   | -0.632081354 | 1.76E-144 | 3.20E-140 |
| <b>TSHZ2</b>     | 0.256886588  | 5.17E-123 | 9.43E-119 |
| <b>TSPAN3</b>    | -0.159744055 | 4.21E-33  | 7.68E-29  |
| <b>TSPAN4</b>    | -0.255235332 | 3.80E-50  | 6.94E-46  |
| <b>TSPO</b>      | -0.374581658 | 4.28E-153 | 7.82E-149 |
| <b>TTC3</b>      | -0.341866508 | 8.81E-115 | 1.61E-110 |
| <b>TUBB</b>      | -0.441982163 | 1.67E-185 | 3.05E-181 |
| <b>TUBB2B</b>    | -0.427682451 | 3.72E-76  | 6.79E-72  |
| <b>TVP23B</b>    | 0.207261806  | 2.53E-47  | 4.61E-43  |
| <b>TXNIP</b>     | -0.299283363 | 1.19E-140 | 2.17E-136 |
| <b>TYMP</b>      | 0.095233346  | 2.23E-12  | 4.07E-08  |
| <b>UBA52</b>     | -0.375740064 | 0         | 0         |
| <b>UBE2B</b>     | 0.105531061  | 4.76E-12  | 8.69E-08  |
| <b>UGP2</b>      | -0.031055494 | 0.006753  | 1         |
| <b>UMAD1</b>     | -0.25094252  | 2.74E-54  | 5.00E-50  |
| <b>UPP1</b>      | 0.779818858  | 1.26E-256 | 2.31E-252 |
| <b>UQCRB</b>     | -0.479797226 | 1.80E-279 | 3.28E-275 |
| <b>UQCRH</b>     | -0.37673204  | 1.09E-211 | 1.98E-207 |
| <b>USMG5</b>     | 0.008052511  | 0.419184  | 1         |
| <b>VAMP5</b>     | -0.109590341 | 4.19E-15  | 7.64E-11  |
| <b>VAPA</b>      | 0.413583535  | 1.27E-150 | 2.31E-146 |
| <b>VCAN</b>      | -0.215304819 | 8.36E-35  | 1.53E-30  |
| <b>VDAC1</b>     | 0.257269171  | 4.09E-44  | 7.46E-40  |
| <b>VEGFA</b>     | 1.135044052  | 0         | 0         |
| <b>VIM</b>       | -0.606059102 | 2.69E-271 | 4.91E-267 |
| <b>VIMP</b>      | 0.113215159  | 1.39E-11  | 2.54E-07  |

|          |           |           |
|----------|-----------|-----------|
| 0.800967 | 0         | 0         |
| -0.26836 | 9.07E-86  | 1.65E-81  |
| 0.216884 | 2.38E-121 | 4.35E-117 |
| 0.276067 | 1.35E-131 | 2.46E-127 |
| -0.31597 | 6.82E-307 | 1.24E-302 |
| 0.040003 | 0.1263158 | 1         |
| -0.37745 | 4.82E-153 | 8.80E-149 |
| -0.41675 | 5.44E-77  | 9.92E-73  |
| -0.3334  | 3.12E-127 | 5.70E-123 |
| -0.55298 | 0         | 0         |
| 0.629349 | 0         | 0         |
| 0.381174 | 8.79E-173 | 1.60E-168 |
| -0.32428 | 2.86E-126 | 5.22E-122 |
| -1.0115  | 0         | 0         |
| 0.161631 | 1.37E-82  | 2.51E-78  |
| -0.34476 | 3.67E-148 | 6.70E-144 |
| -0.38808 | 1.47E-159 | 2.68E-155 |
| -0.48163 | 1.99E-281 | 3.62E-277 |
| -0.49969 | 1.54E-251 | 2.81E-247 |
| -0.27873 | 2.33E-109 | 4.25E-105 |
| -0.31117 | 2.72E-50  | 4.96E-46  |
| 0.278767 | 1.78E-86  | 3.24E-82  |
| -0.29632 | 4.92E-203 | 8.98E-199 |
| 0.297859 | 2.30E-83  | 4.19E-79  |
| -0.22431 | 5.52E-222 | 1.01E-217 |
| 0.26761  | 4.92E-90  | 8.97E-86  |
| -0.25854 | 3.32E-84  | 6.05E-80  |
| -0.28387 | 1.59E-109 | 2.90E-105 |
| 1.272814 | 0         | 0         |
| -0.25177 | 2.60E-100 | 4.74E-96  |
| -0.26468 | 1.49E-145 | 2.72E-141 |
| 0.265916 | 1.01E-116 | 1.84E-112 |
| -0.27354 | 4.13E-93  | 7.54E-89  |
| 0.577676 | 0         | 0         |
| -0.44699 | 4.91E-162 | 8.97E-158 |
| 0.336878 | 9.71E-115 | 1.77E-110 |
| 1.027389 | 0         | 0         |
| -0.56591 | 0         | 0         |
| 0.337029 | 2.86E-118 | 5.22E-114 |

|                |              |           |           |          |           |           |
|----------------|--------------|-----------|-----------|----------|-----------|-----------|
| <b>VKORC1</b>  | -0.112391436 | 2.10E-15  | 3.83E-11  | -0.38707 | 5.24E-179 | 9.57E-175 |
| <b>VMP1</b>    | 0.223207265  | 2.40E-27  | 4.39E-23  | 0.416965 | 4.82E-92  | 8.80E-88  |
| <b>WDR33</b>   | 0.281001819  | 1.40E-53  | 2.56E-49  | 0.352184 | 3.88E-100 | 7.08E-96  |
| <b>WDR45B</b>  | 0.37695991   | 3.96E-116 | 7.23E-112 | 0.352001 | 1.61E-135 | 2.94E-131 |
| <b>WSB1</b>    | 0.285670978  | 7.79E-75  | 1.42E-70  | 0.30563  | 3.44E-69  | 6.28E-65  |
| <b>WTAP</b>    | 0.782914133  | 2.67E-213 | 4.87E-209 | 1.010374 | 0         | 0         |
| <b>WWP2</b>    | 0.307214884  | 7.9E-46   | 1.44E-41  | -0.26672 | 2.142E-59 | 3.91E-55  |
| <b>XAGE2</b>   | -0.673552506 | 2.32E-144 | 4.23E-140 | -0.51369 | 1.60E-139 | 2.91E-135 |
| <b>XBP1</b>    | 0.283093056  | 1.42E-48  | 2.59E-44  | 0.292176 | 1.99E-60  | 3.64E-56  |
| <b>YBX1</b>    | -0.399728116 | 1.53E-233 | 2.80E-229 | -0.44095 | 0         | 0         |
| <b>YBX3</b>    | -0.613452969 | 0         | 0         | -0.62471 | 0         | 0         |
| <b>ZBTB20</b>  | -0.38546287  | 1.01E-147 | 1.84E-143 | -0.40969 | 1.39E-238 | 2.54E-234 |
| <b>ZFAND5</b>  | 0.158420143  | 2.23E-19  | 4.06E-15  | 0.304339 | 4.53E-74  | 8.27E-70  |
| <b>ZFAS1</b>   | -0.291533576 | 3.06E-94  | 5.58E-90  | 0.069741 | 2.16E-09  | 3.94E-05  |
| <b>ZFP36L2</b> | -0.962161339 | 0         | 0         | -0.84876 | 0         | 0         |
| <b>ZIC1</b>    | -0.268645915 | 2.80E-63  | 5.12E-59  | -0.23816 | 6.31E-96  | 1.15E-91  |
| <b>ZNF385D</b> | 0.292309231  | 3.86E-60  | 7.04E-56  | 0.434037 | 9.24E-153 | 1.69E-148 |
| <b>ZNF593</b>  | 0.209237054  | 1.16E-43  | 2.11E-39  | 0.452242 | 9.99E-217 | 1.82E-212 |
| <b>ZNF90</b>   | -0.272972744 | 1.12E-77  | 2.04E-73  | -0.00679 | 0.1956773 | 1         |
